# Supplementary material for: Prenatal and childhood exposure to per-/polyfluoroalkyl substances (PFASs) and its associations with childhood overweight and/or obesity: a systematic review with meta-analyses
Source: PubMed Central journal article supplement (PMC10424367; doi:10.1186/s12940-023-01006-6), 2023-08-14

# **Prenatal and childhood exposure to per-/polyfluoroalkyl substances (PFASs) and its associations with childhood overweight and/or obesity: a systematic review with meta-analyses**

Gianfranco Frigerio, Chiara Matilde Ferrari, and Silvia Fustinoni

## **Supplementary figures**

For each meta-analysis, three figures are reported:

- a forest plot pooling the estimates with the generic invariance method
- a forest plot pooling the estimates weighting by sample size
- a funnel plot evaluating the bias for included studies

Prenatal and childhood exposure to per-/polyfluoroalkyl substances (PFASs) and its associations with childhood overweight and/or obesity: a systematic review with meta-analyses

Gianfranco Frigerio, Chiara Matilde Ferrari, and Silvia Fustinoni

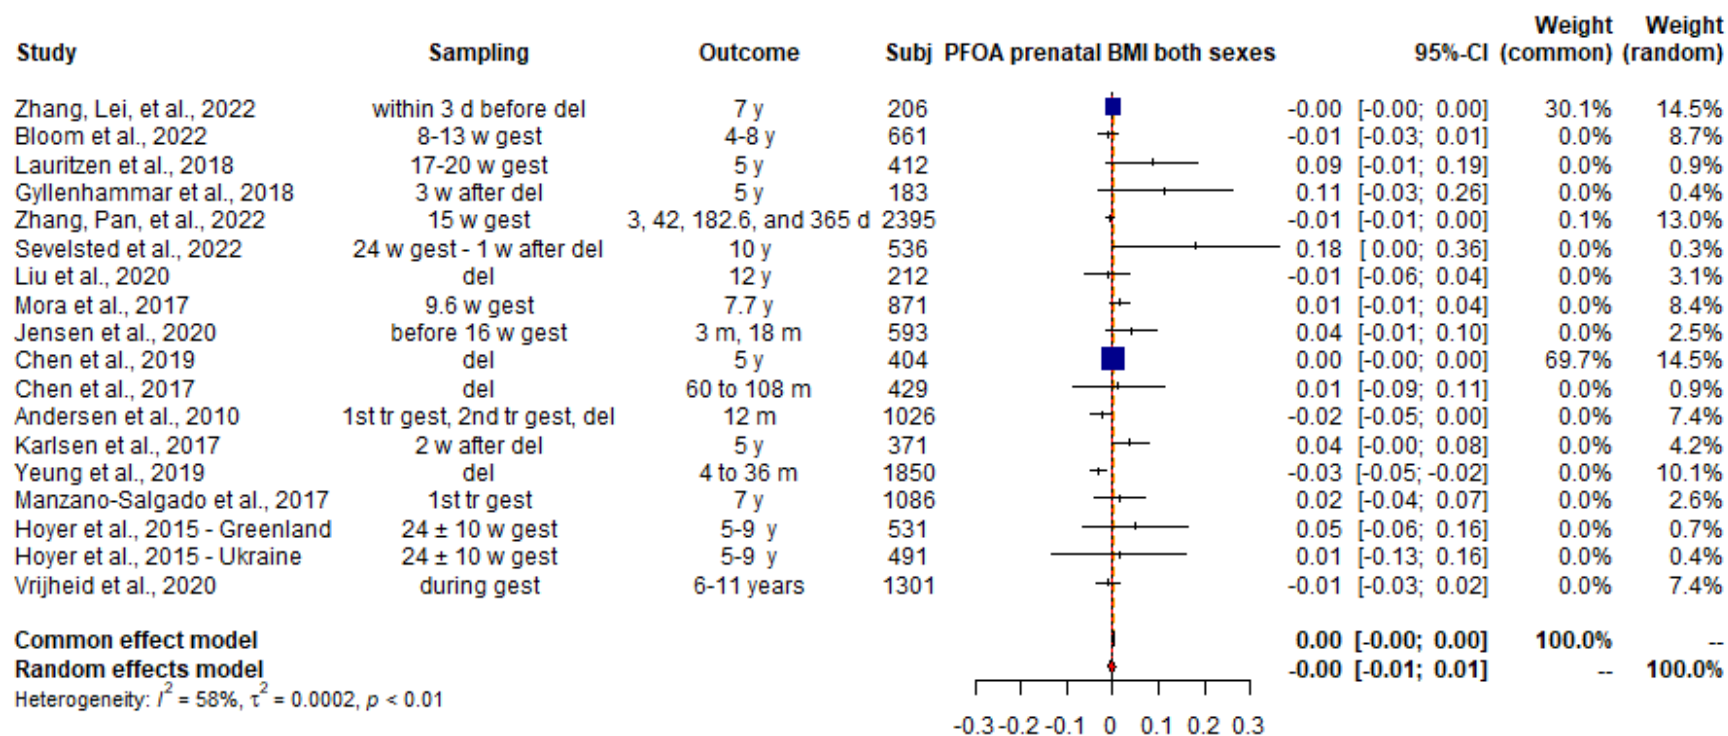

Prenatal and childhood exposure to per-/polyfluoroalkyl substances (PFASs) and its associations with childhood overweight and/or obesity: a systematic review with meta-analyses

Gianfranco Frigerio, Chiara Matilde Ferrari, and Silvia Fustinoni

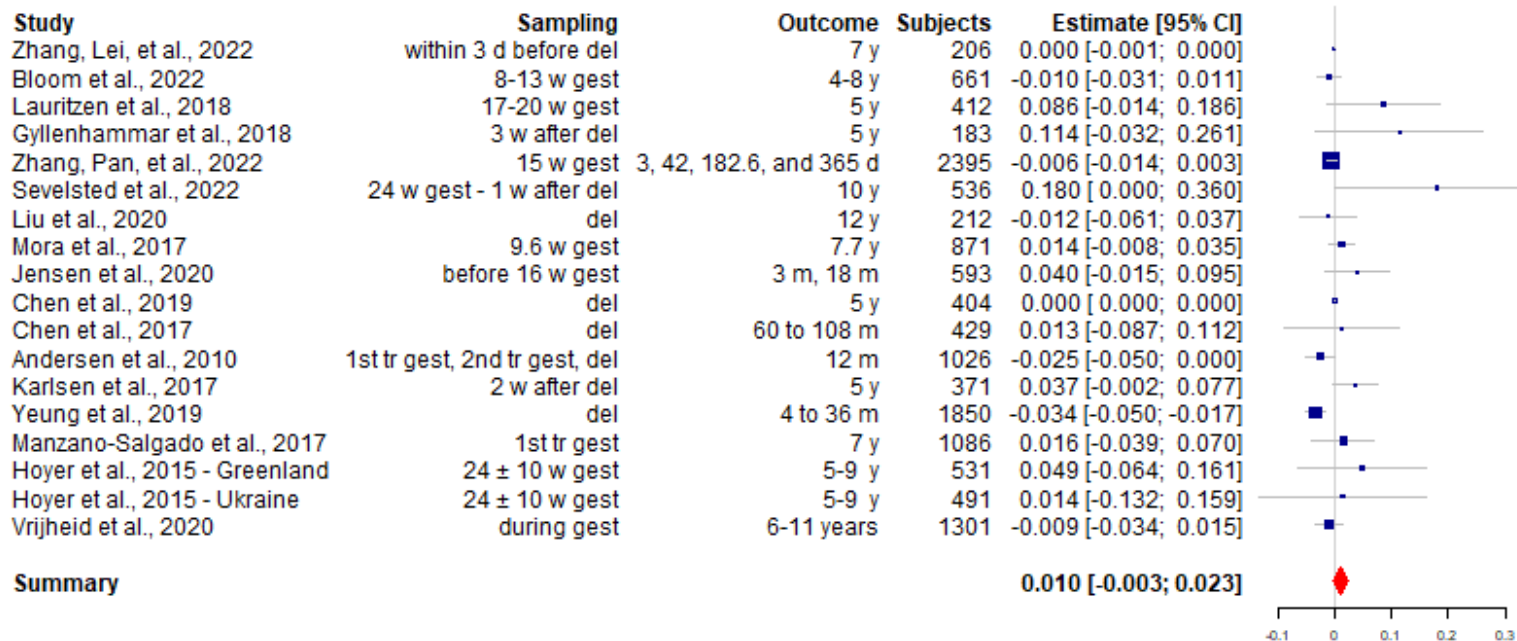

Prenatal and childhood exposure to per-/polyfluoroalkyl substances (PFASs) and its associations with childhood overweight and/or obesity: a systematic review with meta-analyses

Gianfranco Frigerio, Chiara Matilde Ferrari, and Silvia Fustinoni

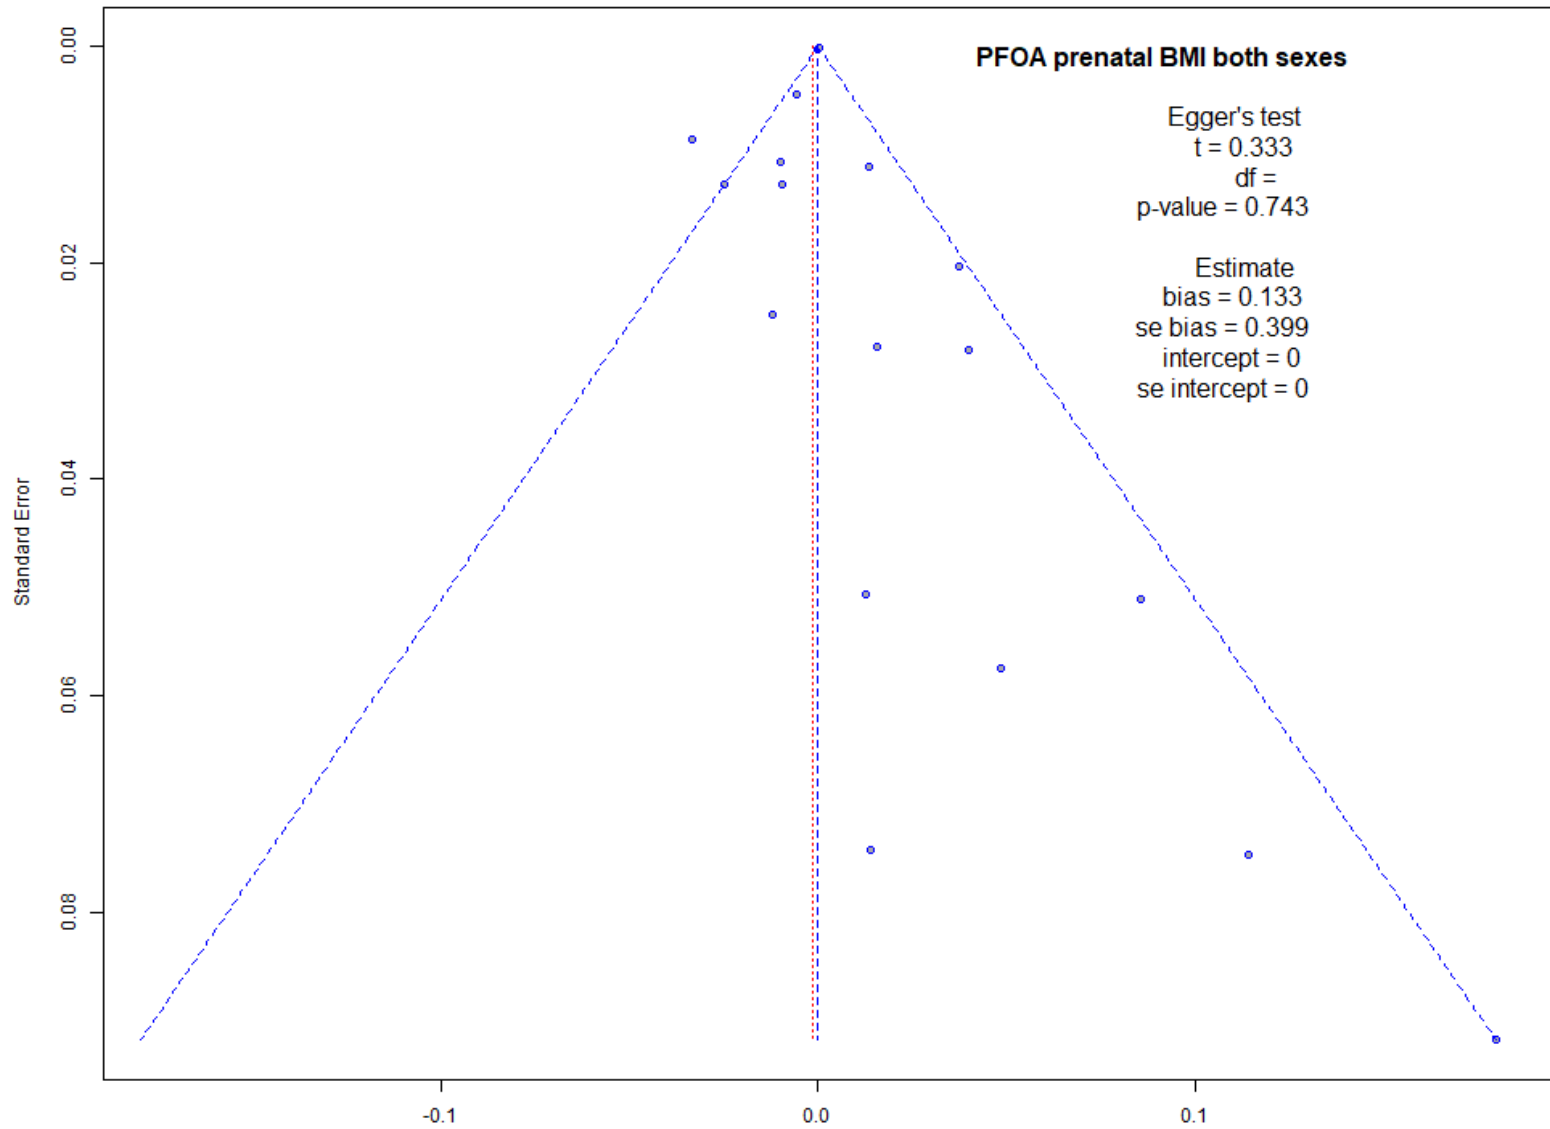

Prenatal and childhood exposure to per-/polyfluoroalkyl substances (PFASs) and its associations with childhood overweight and/or obesity: a systematic review with meta-analyses

Gianfranco Frigerio, Chiara Matilde Ferrari, and Silvia Fustinoni

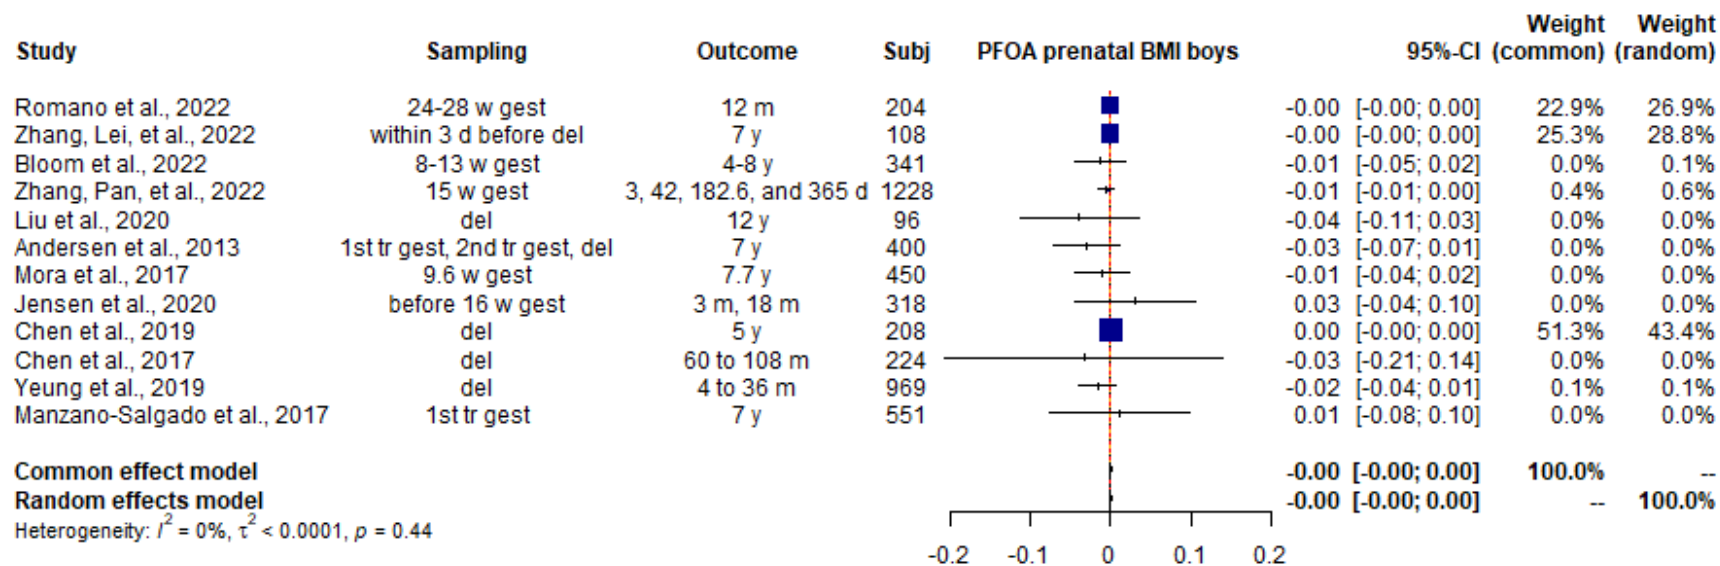

# Prenatal and childhood exposure to per-/polyfluoroalkyl substances (PFASs) and its associations with childhood overweight and/or obesity: a systematic review with meta-analyses

Gianfranco Frigerio, Chiara Matilde Ferrari, and Silvia Fustinoni

| Study                        | Sampling                      | Outcome                 | Subjects | Estimate [95% CI]             |
|------------------------------|-------------------------------|-------------------------|----------|-------------------------------|
| Romano et al., 2022          | 24-28 w gest                  | 12 m                    | 204      | -0.001 [-0.002; 0.001]        |
| Zhang, Lei, et al., 2022     | within 3 d before del         | 7 y                     | 108      | -0.001 [-0.002; 0.001]        |
| Bloom et al., 2022           | 8-13 w gest                   | 4-8 y                   | 341      | -0.014 [-0.046; 0.018]        |
| Zhang, Pan, et al., 2022     | 15 w gest                     | 3, 42, 182.6, and 365 d | 1228     | -0.006 [-0.015; 0.003]        |
| Liu et al., 2020             | del                           | 12 y                    | 96       | -0.040 [-0.114; 0.034]        |
| Andersen et al., 2013        | 1st tr gest, 2nd tr gest, del | 7 y                     | 400      | -0.030 [-0.072; 0.011]        |
| Mora et al., 2017            | 9.6 w gest                    | 7.7 y                   | 450      | -0.011 [-0.045; 0.023]        |
| Jensen et al., 2020          | before 16 w gest              | 3 m, 18 m               | 318      | 0.030 [-0.045; 0.105]         |
| Chen et al., 2019            | del                           | 5 y                     | 208      | 0.000 [0.000; 0.001]          |
| Chen et al., 2017            | del                           | 60 to 108 m             | 224      | -0.034 [-0.207; 0.140]        |
| Yeung et al., 2019           | del                           | 4 to 36 m               | 969      | -0.017 [-0.040; 0.006]        |
| Manzano-Salgado et al., 2017 | 1st tr gest                   | 7 y                     | 551      | 0.010 [-0.078; 0.098]         |
| <b>Summary</b>               |                               |                         |          | <b>-0.008 [-0.023; 0.007]</b> |

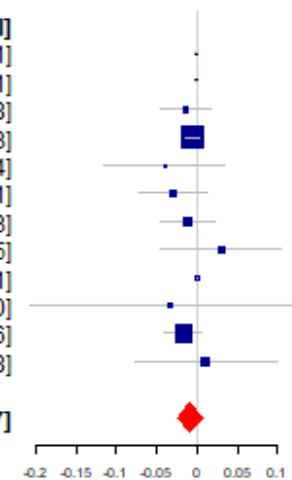

Prenatal and childhood exposure to per-/polyfluoroalkyl substances (PFASs) and its associations with childhood overweight and/or obesity: a systematic review with meta-analyses

Gianfranco Frigerio, Chiara Matilde Ferrari, and Silvia Fustinoni

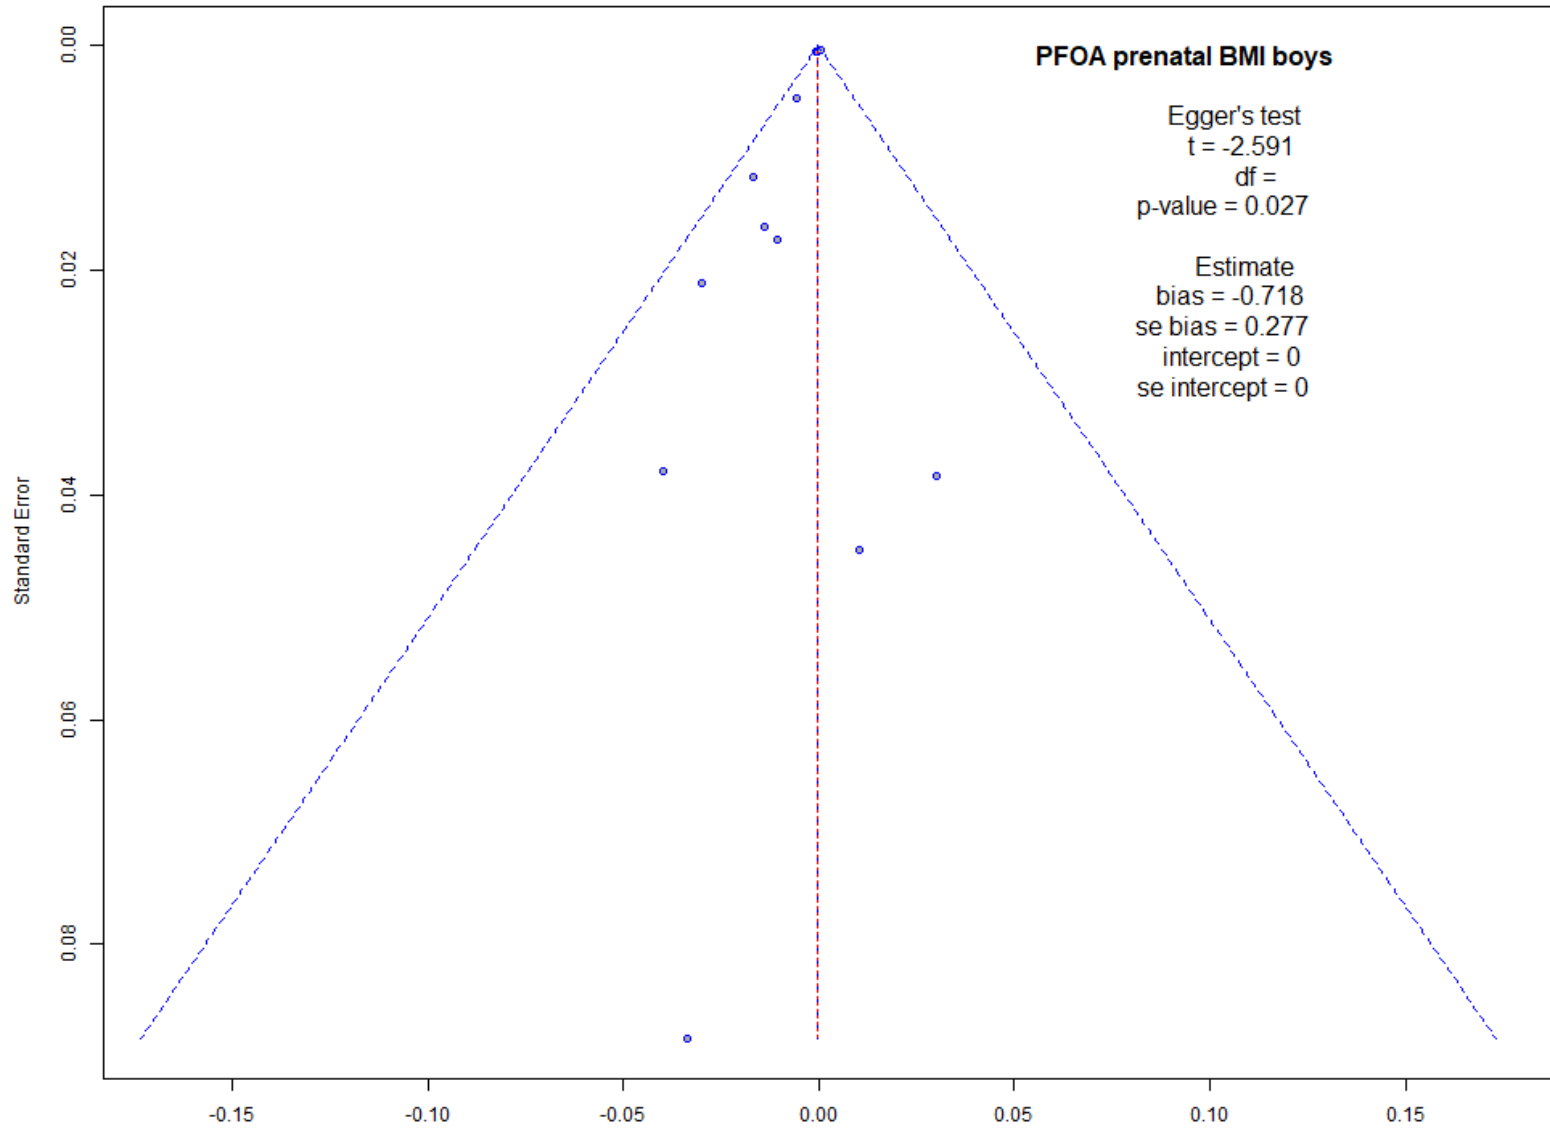

**Prenatal and childhood exposure to per-/polyfluoroalkyl substances (PFASs) and its associations with childhood overweight and/or obesity: a systematic review with meta-analyses**

Gianfranco Frigerio, Chiara Matilde Ferrari, and Silvia Fustinoni

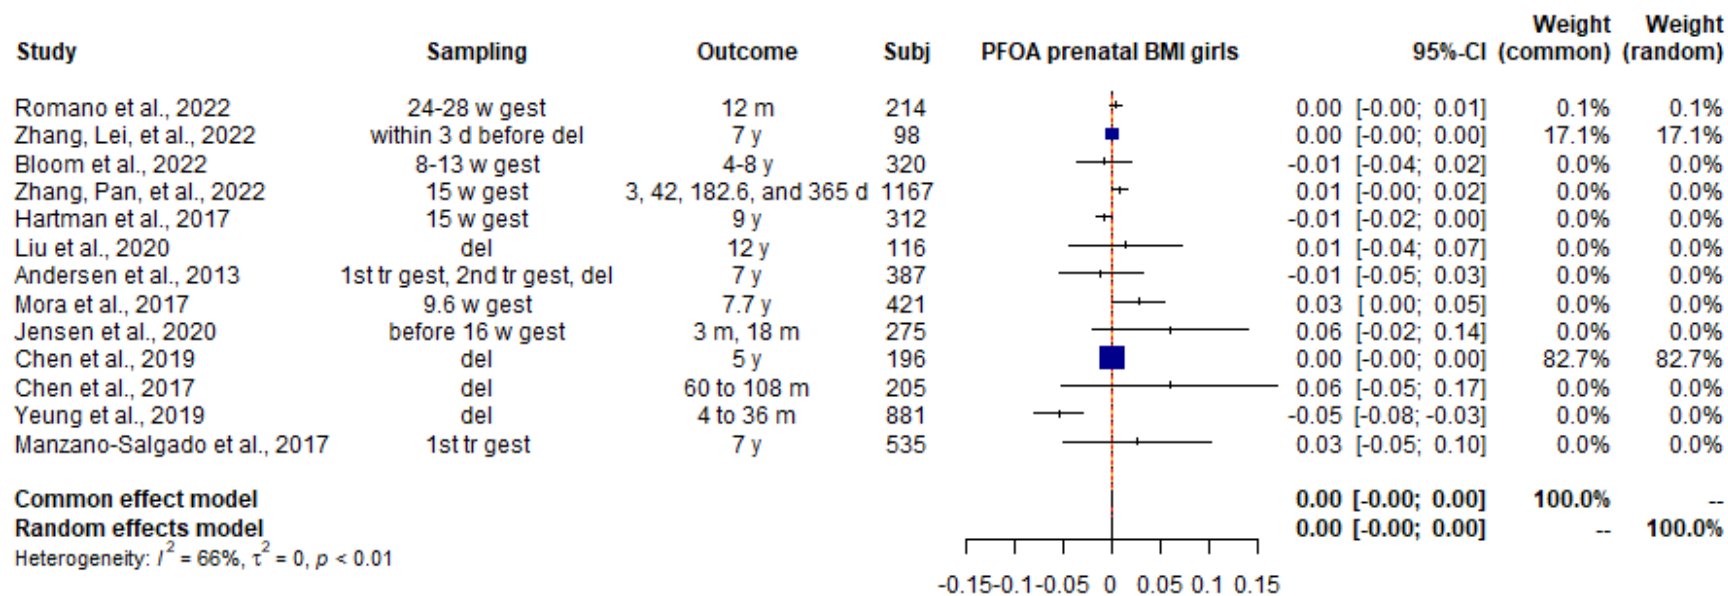



**Prenatal and childhood exposure to per-/polyfluoroalkyl substances (PFASs) and its associations with childhood overweight and/or obesity: a systematic review with meta-analyses**

Gianfranco Frigerio, Chiara Matilde Ferrari, and Silvia Fustinoni

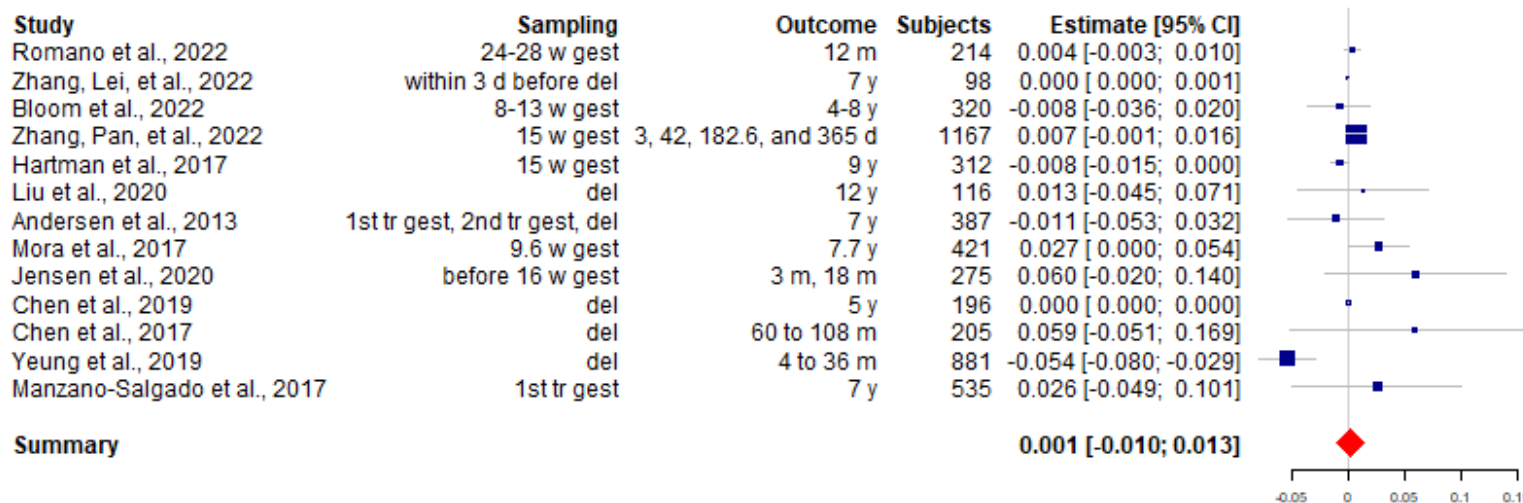

Prenatal and childhood exposure to per-/polyfluoroalkyl substances (PFASs) and its associations with childhood overweight and/or obesity: a systematic review with meta-analyses

Gianfranco Frigerio, Chiara Matilde Ferrari, and Silvia Fustinoni

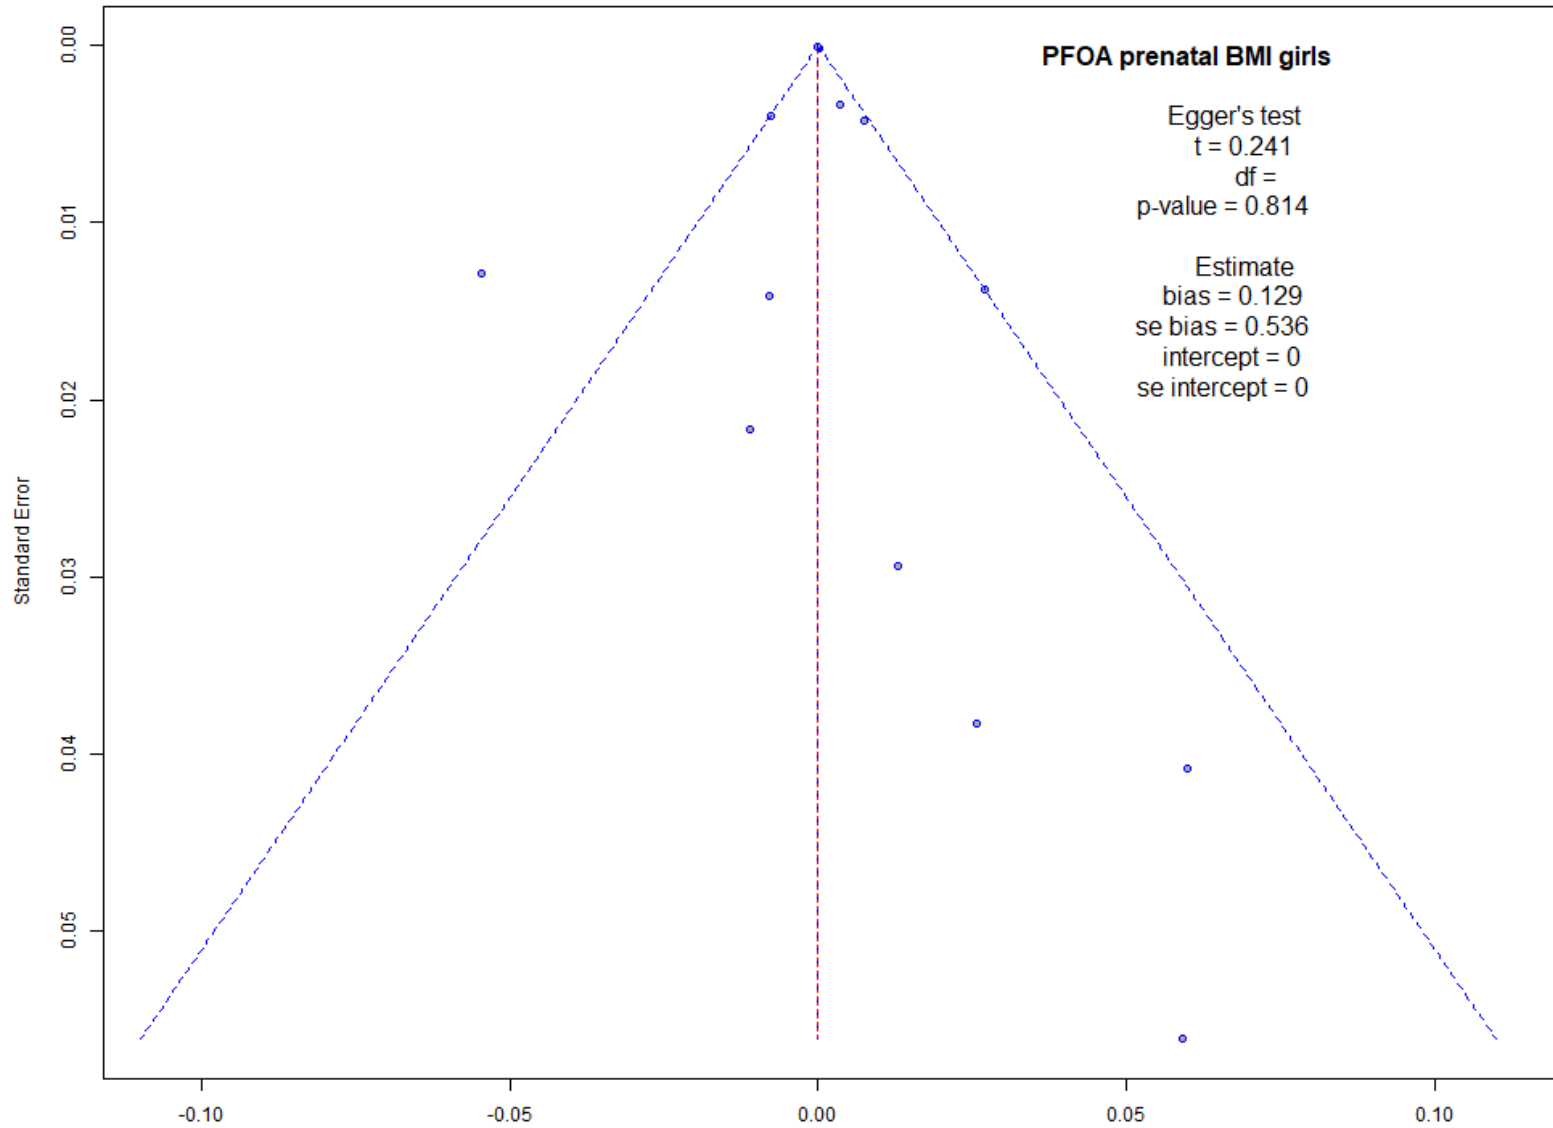

Prenatal and childhood exposure to per-/polyfluoroalkyl substances (PFASs) and its associations with childhood overweight and/or obesity: a systematic review with meta-analyses

Gianfranco Frigerio, Chiara Matilde Ferrari, and Silvia Fustinoni

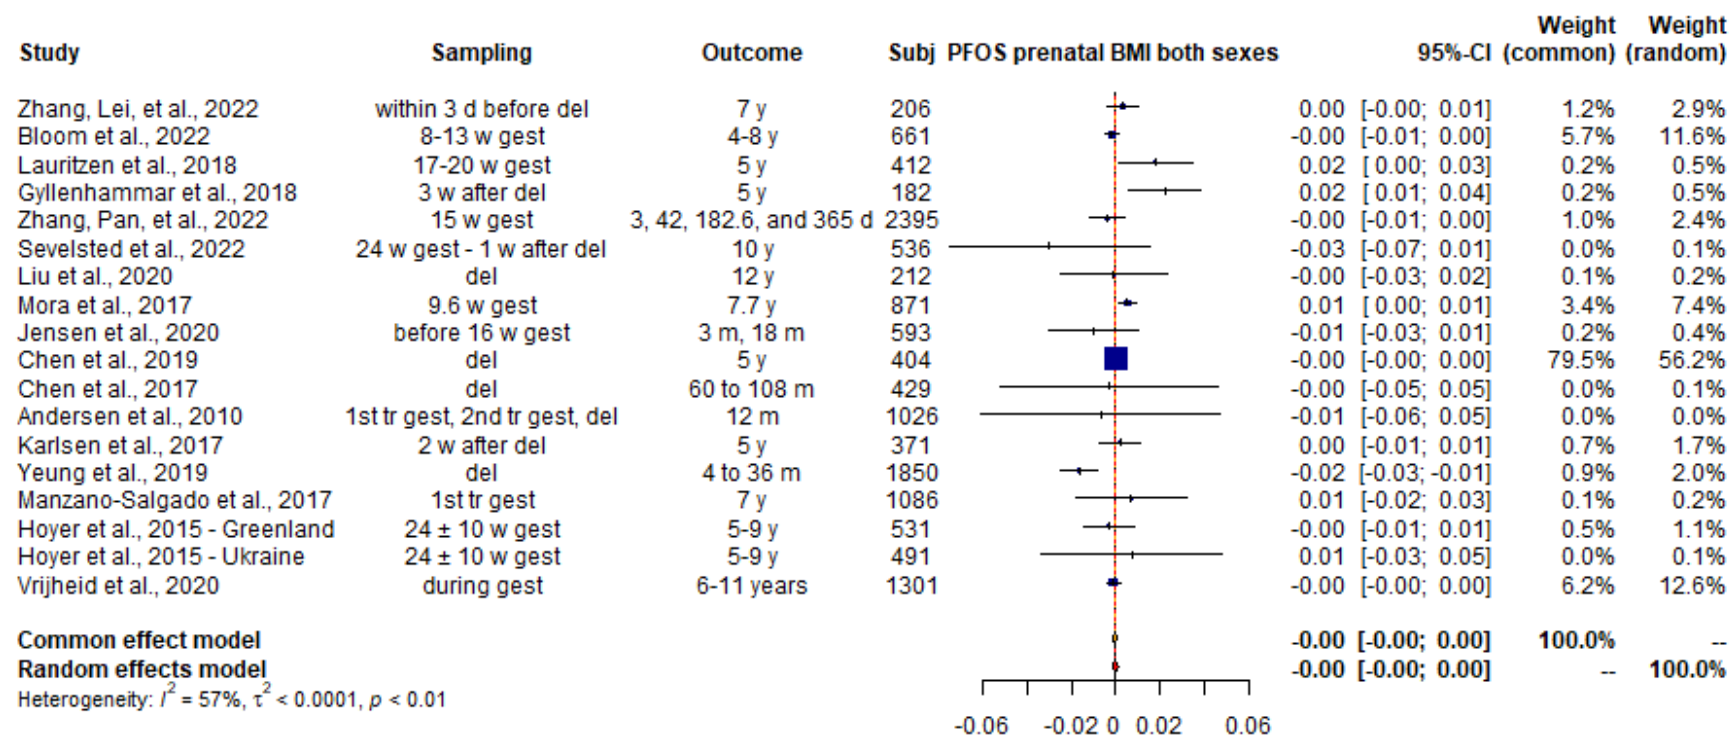

Prenatal and childhood exposure to per-/polyfluoroalkyl substances (PFASs) and its associations with childhood overweight and/or obesity: a systematic review with meta-analyses

Gianfranco Frigerio, Chiara Matilde Ferrari, and Silvia Fustinoni

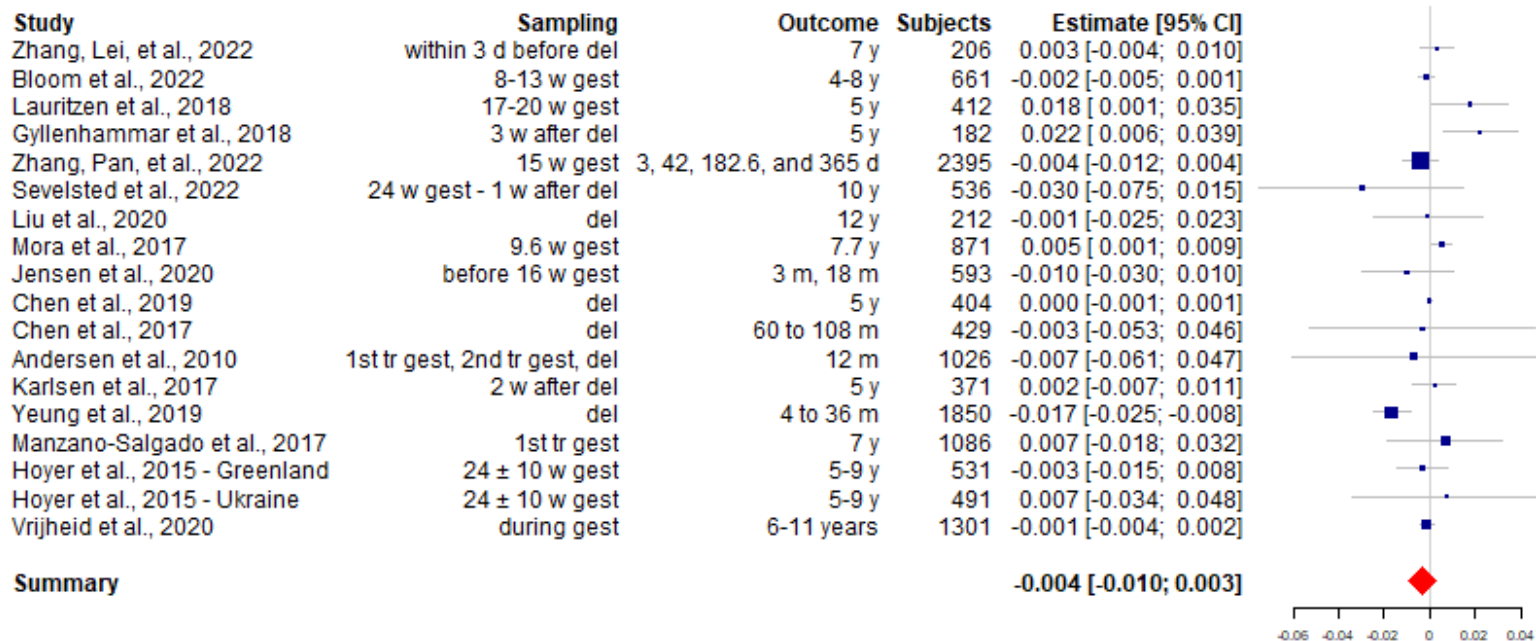

Prenatal and childhood exposure to per-/polyfluoroalkyl substances (PFASs) and its associations with childhood overweight and/or obesity: a systematic review with meta-analyses

Gianfranco Frigerio, Chiara Matilde Ferrari, and Silvia Fustinoni

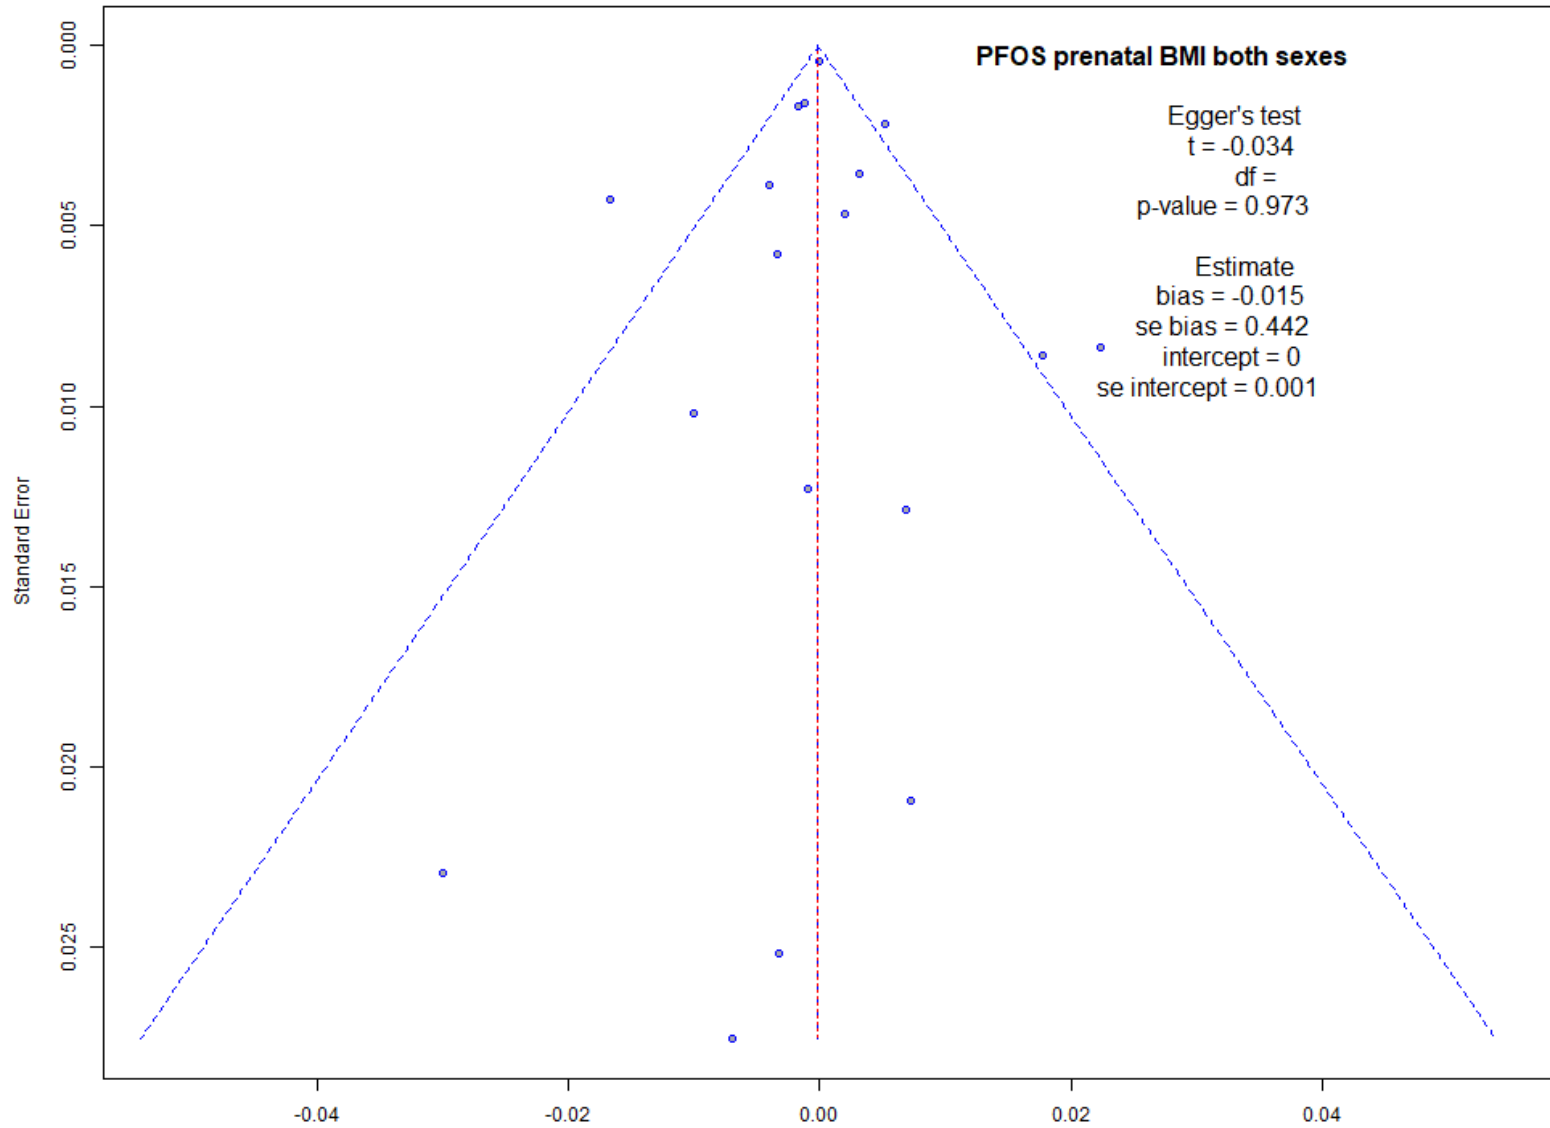

Prenatal and childhood exposure to per-/polyfluoroalkyl substances (PFASs) and its associations with childhood overweight and/or obesity: a systematic review with meta-analyses

Gianfranco Frigerio, Chiara Matilde Ferrari, and Silvia Fustinoni

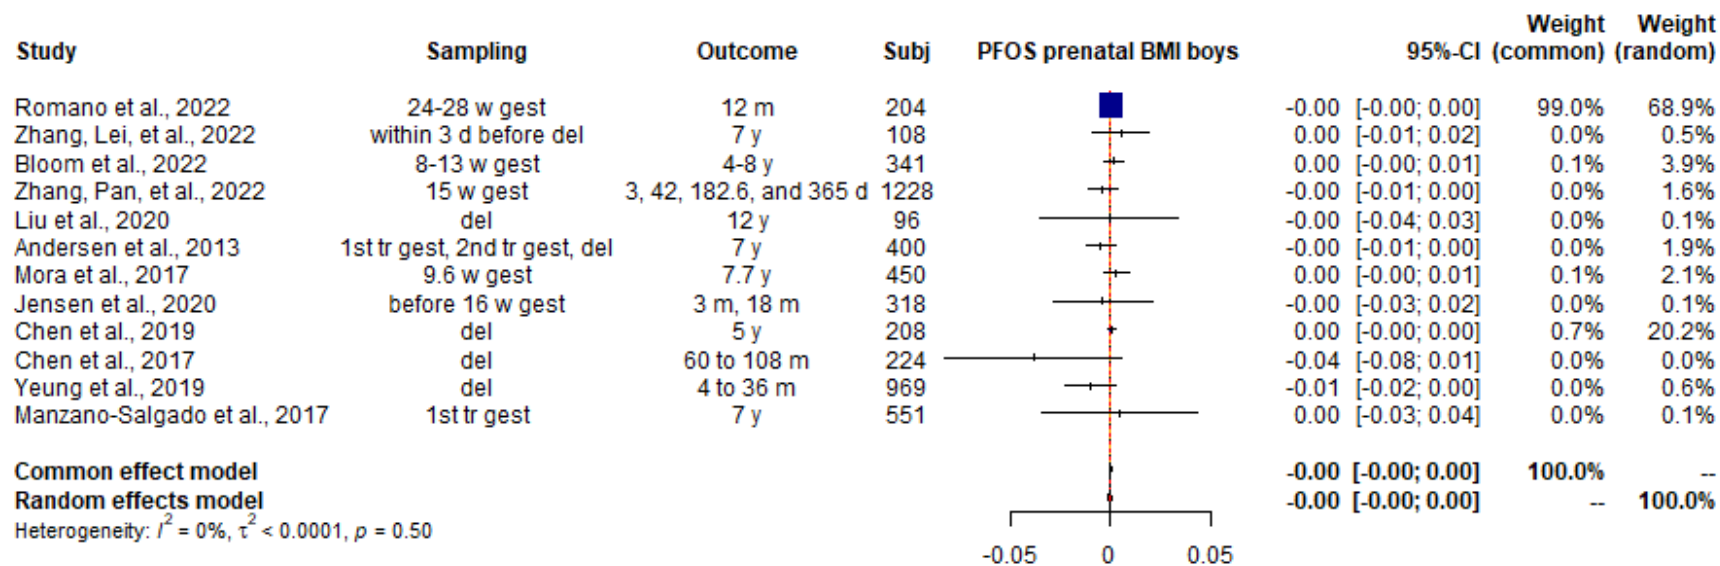

**Prenatal and childhood exposure to per-/polyfluoroalkyl substances (PFASs) and its associations with childhood overweight and/or obesity: a systematic review with meta-analyses**

Gianfranco Frigerio, Chiara Matilde Ferrari, and Silvia Fustinoni

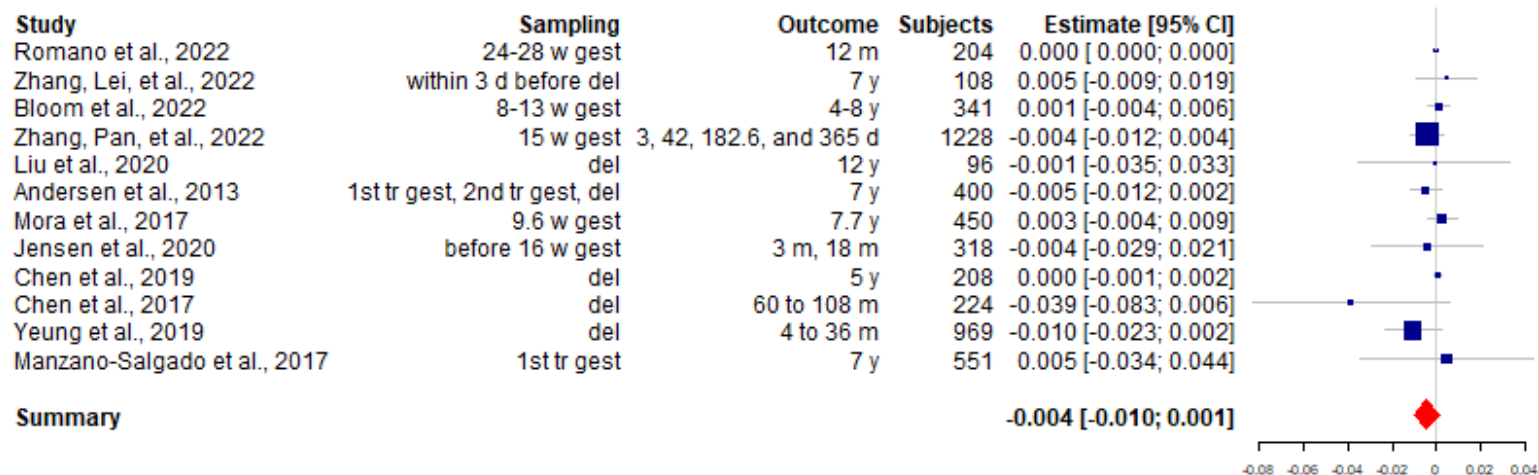

Prenatal and childhood exposure to per-/polyfluoroalkyl substances (PFASs) and its associations with childhood overweight and/or obesity: a systematic review with meta-analyses

Gianfranco Frigerio, Chiara Matilde Ferrari, and Silvia Fustinoni

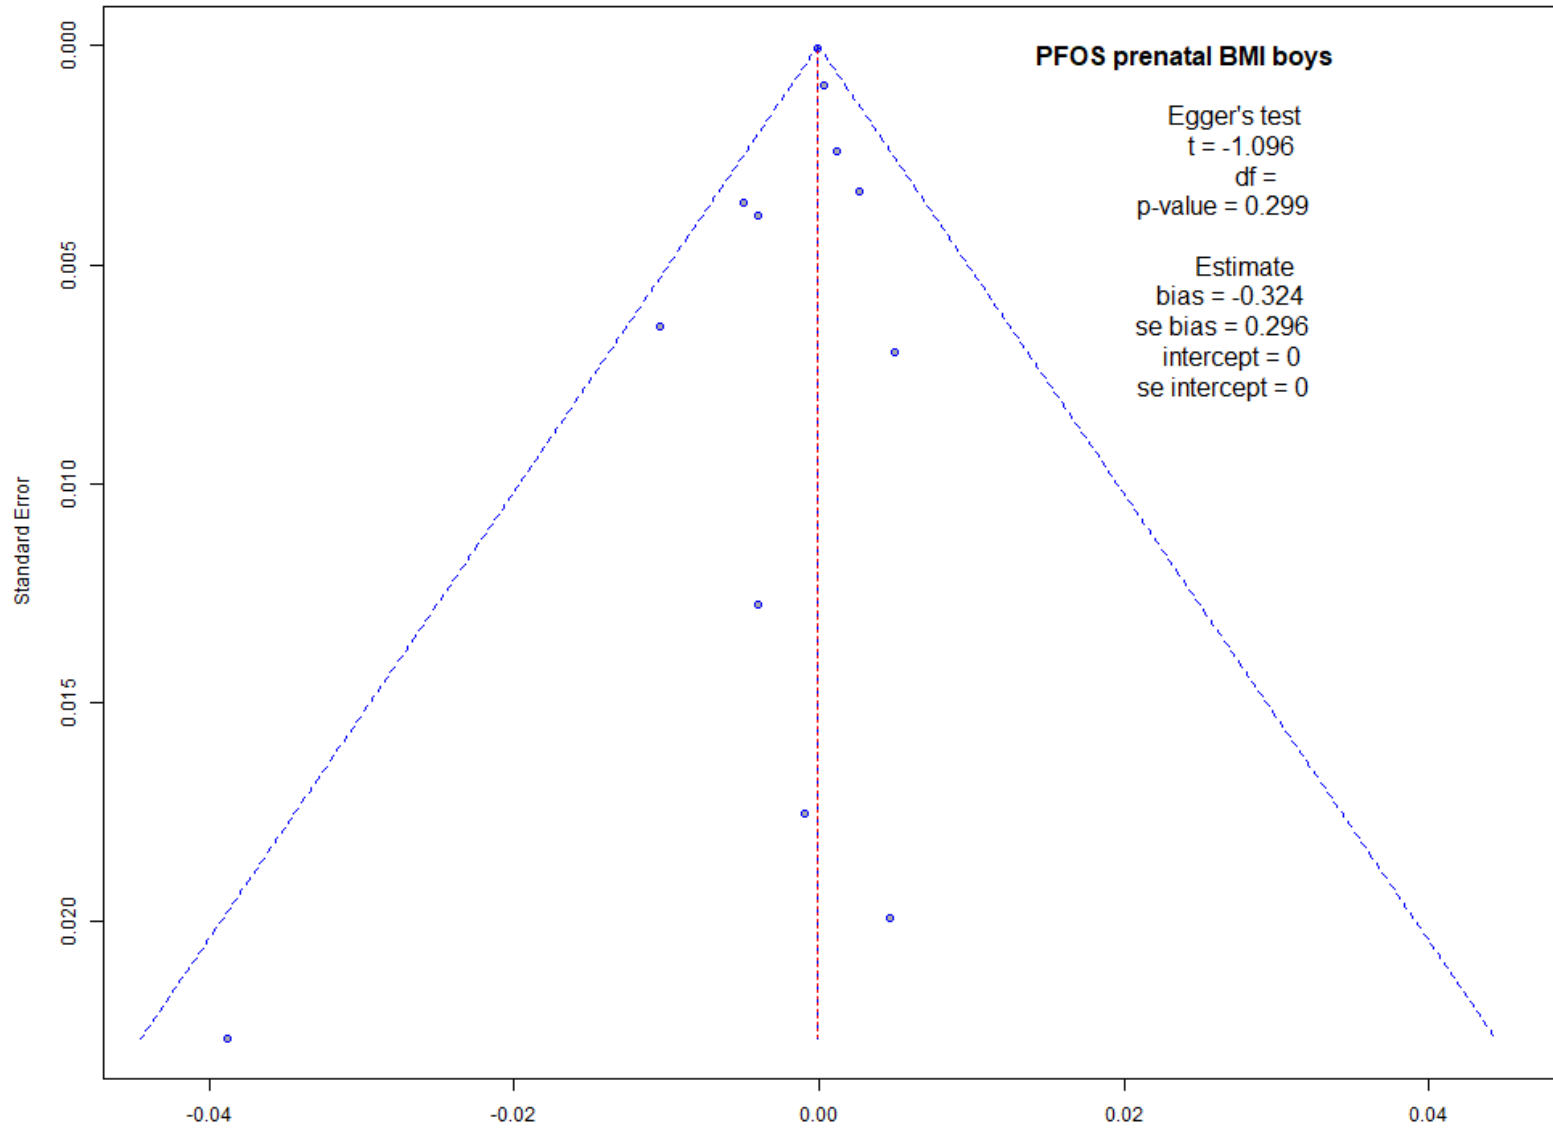



Prenatal and childhood exposure to per-/polyfluoroalkyl substances (PFASs) and its associations with childhood overweight and/or obesity: a systematic review with meta-analyses

Gianfranco Frigerio, Chiara Matilde Ferrari, and Silvia Fustinoni

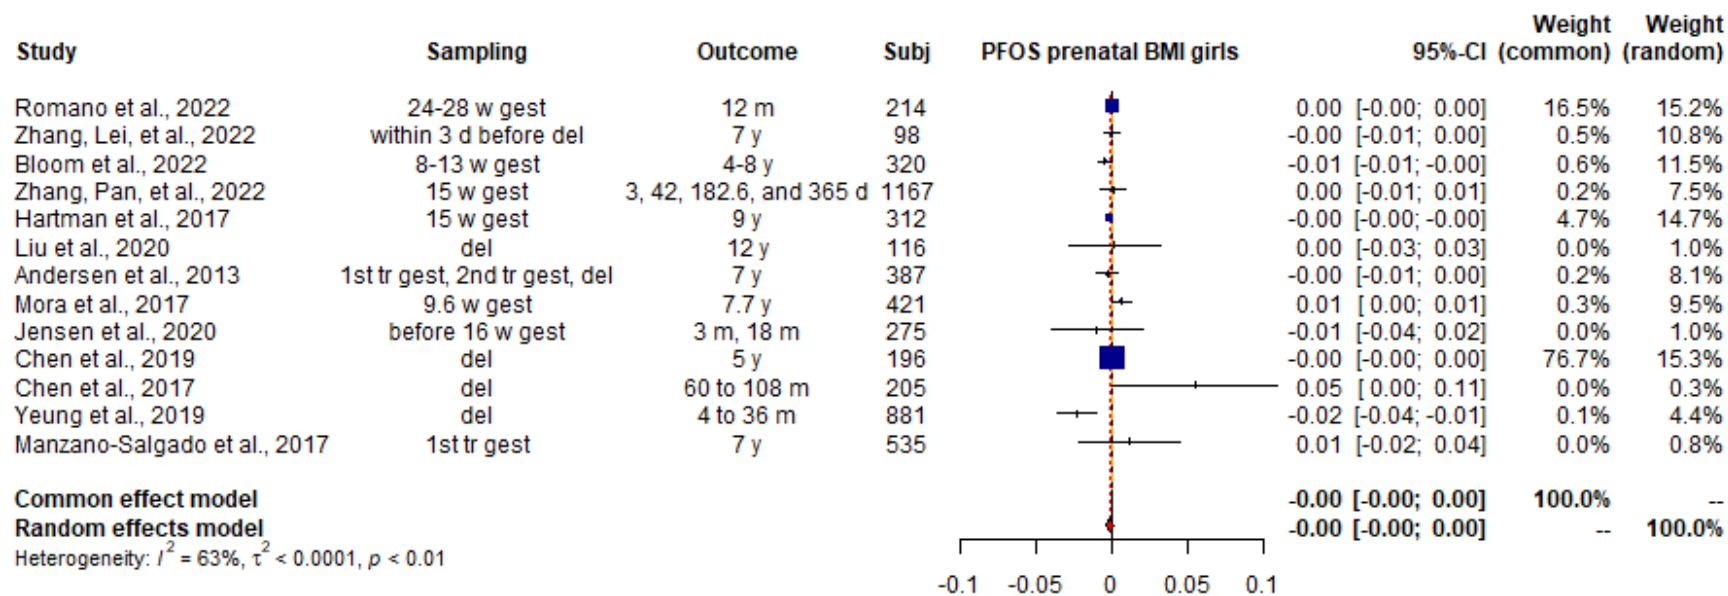

# Prenatal and childhood exposure to per-/polyfluoroalkyl substances (PFASs) and its associations with childhood overweight and/or obesity: a systematic review with meta-analyses

Gianfranco Frigerio, Chiara Matilde Ferrari, and Silvia Fustinoni

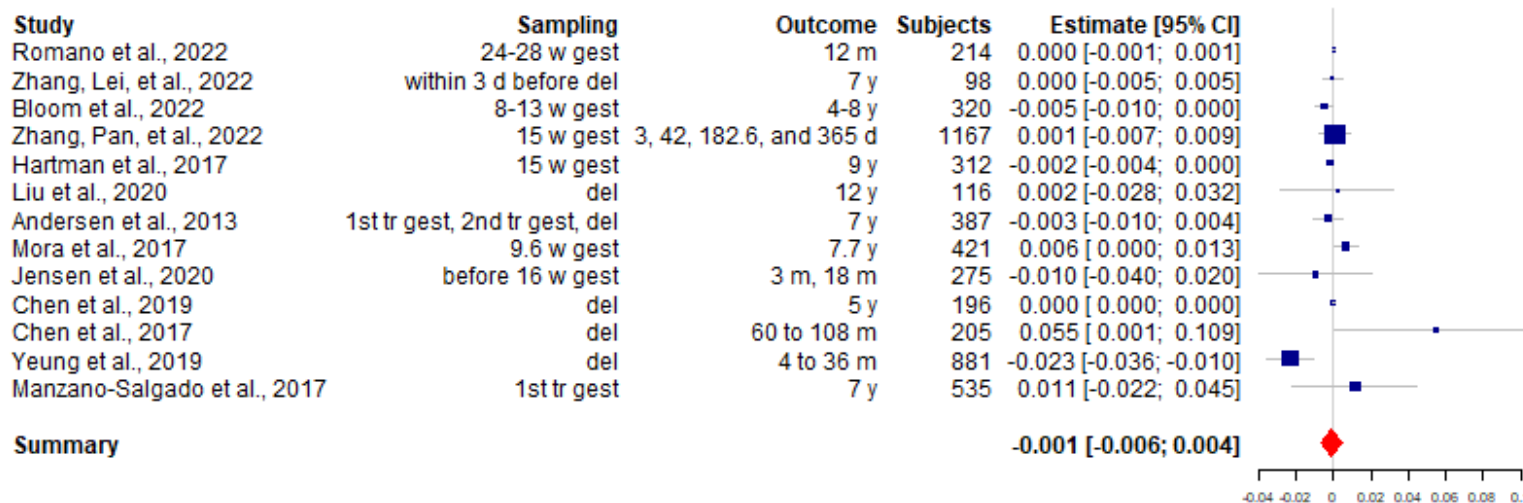

Prenatal and childhood exposure to per-/polyfluoroalkyl substances (PFASs) and its associations with childhood overweight and/or obesity: a systematic review with meta-analyses

Gianfranco Frigerio, Chiara Matilde Ferrari, and Silvia Fustinoni

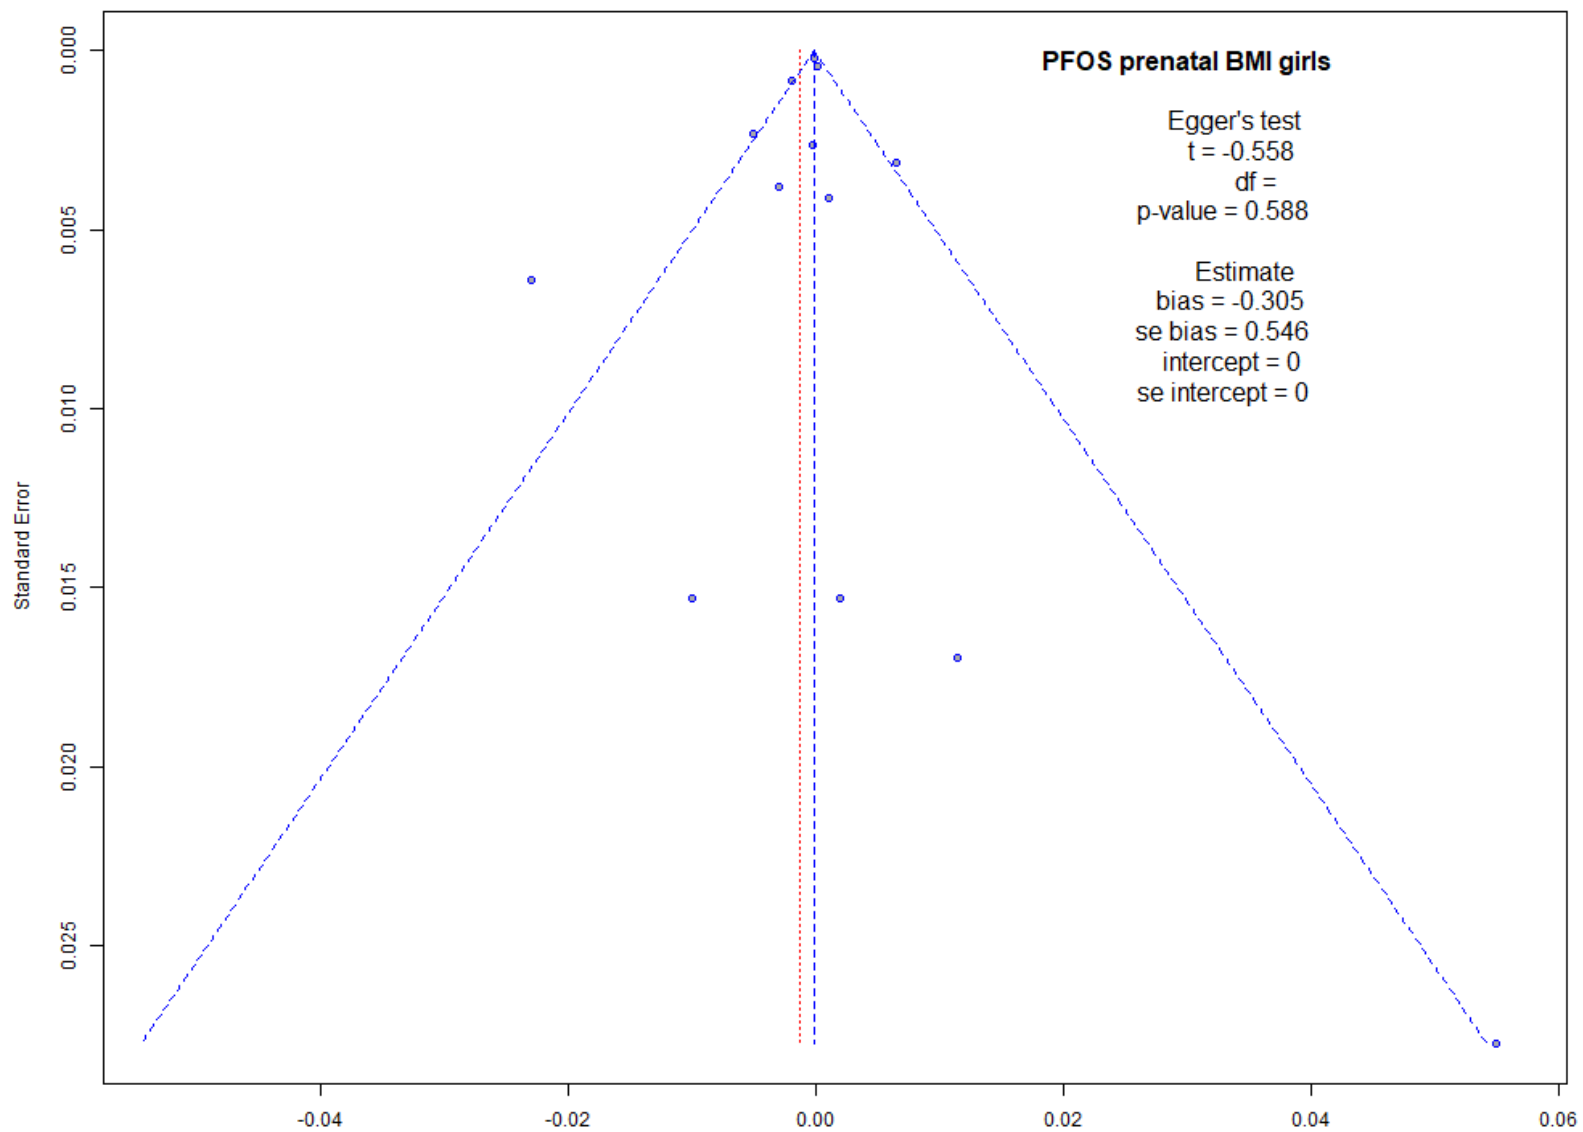

Prenatal and childhood exposure to per-/polyfluoroalkyl substances (PFASs) and its associations with childhood overweight and/or obesity: a systematic review with meta-analyses

Gianfranco Frigerio, Chiara Matilde Ferrari, and Silvia Fustinoni

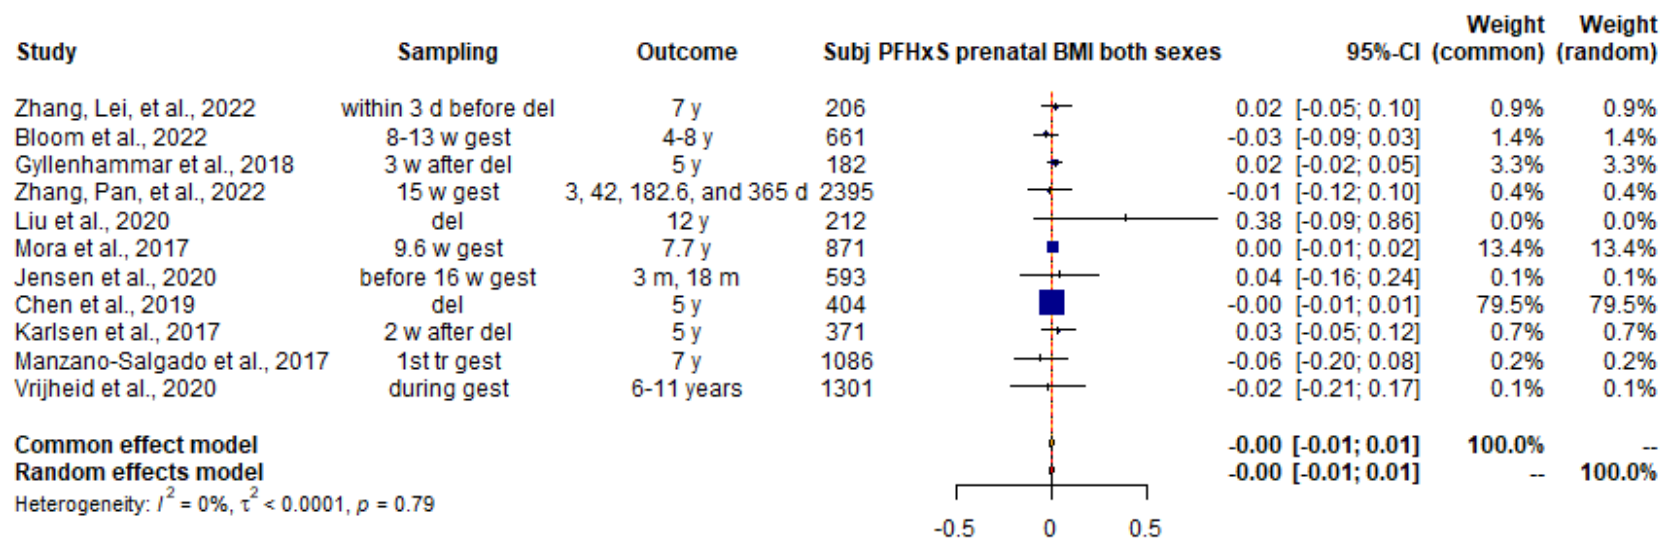

**Prenatal and childhood exposure to per-/polyfluoroalkyl substances (PFASs) and its associations with childhood overweight and/or obesity: a systematic review with meta-analyses**

Gianfranco Frigerio, Chiara Matilde Ferrari, and Silvia Fustinoni

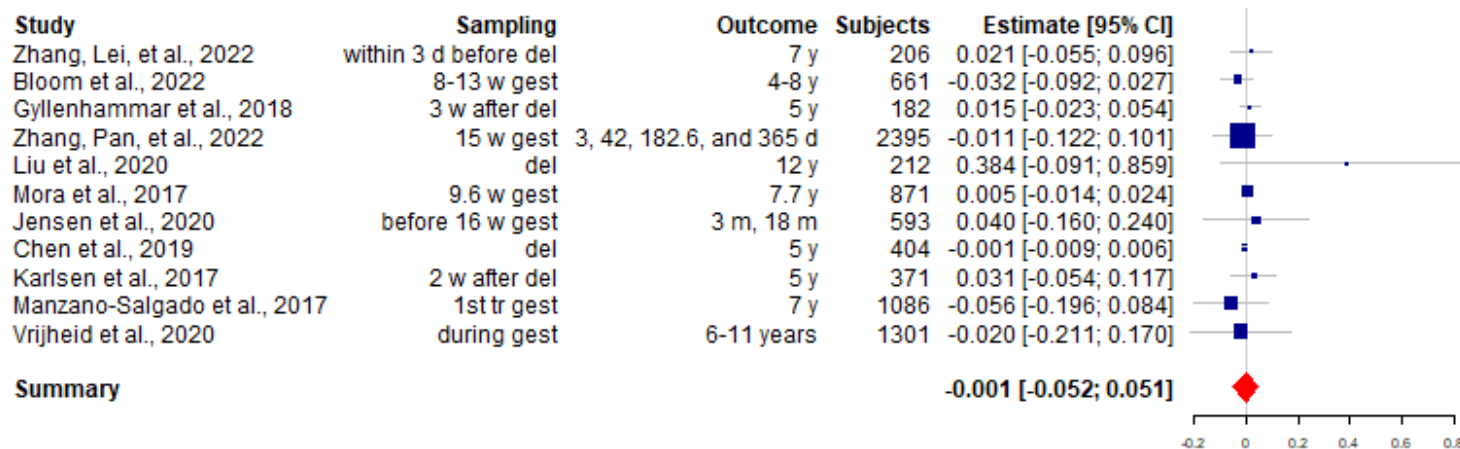

# Prenatal and childhood exposure to per-/polyfluoroalkyl substances (PFASs) and its associations with childhood overweight and/or obesity: a systematic review with meta-analyses

Gianfranco Frigerio, Chiara Matilde Ferrari, and Silvia Fustinoni

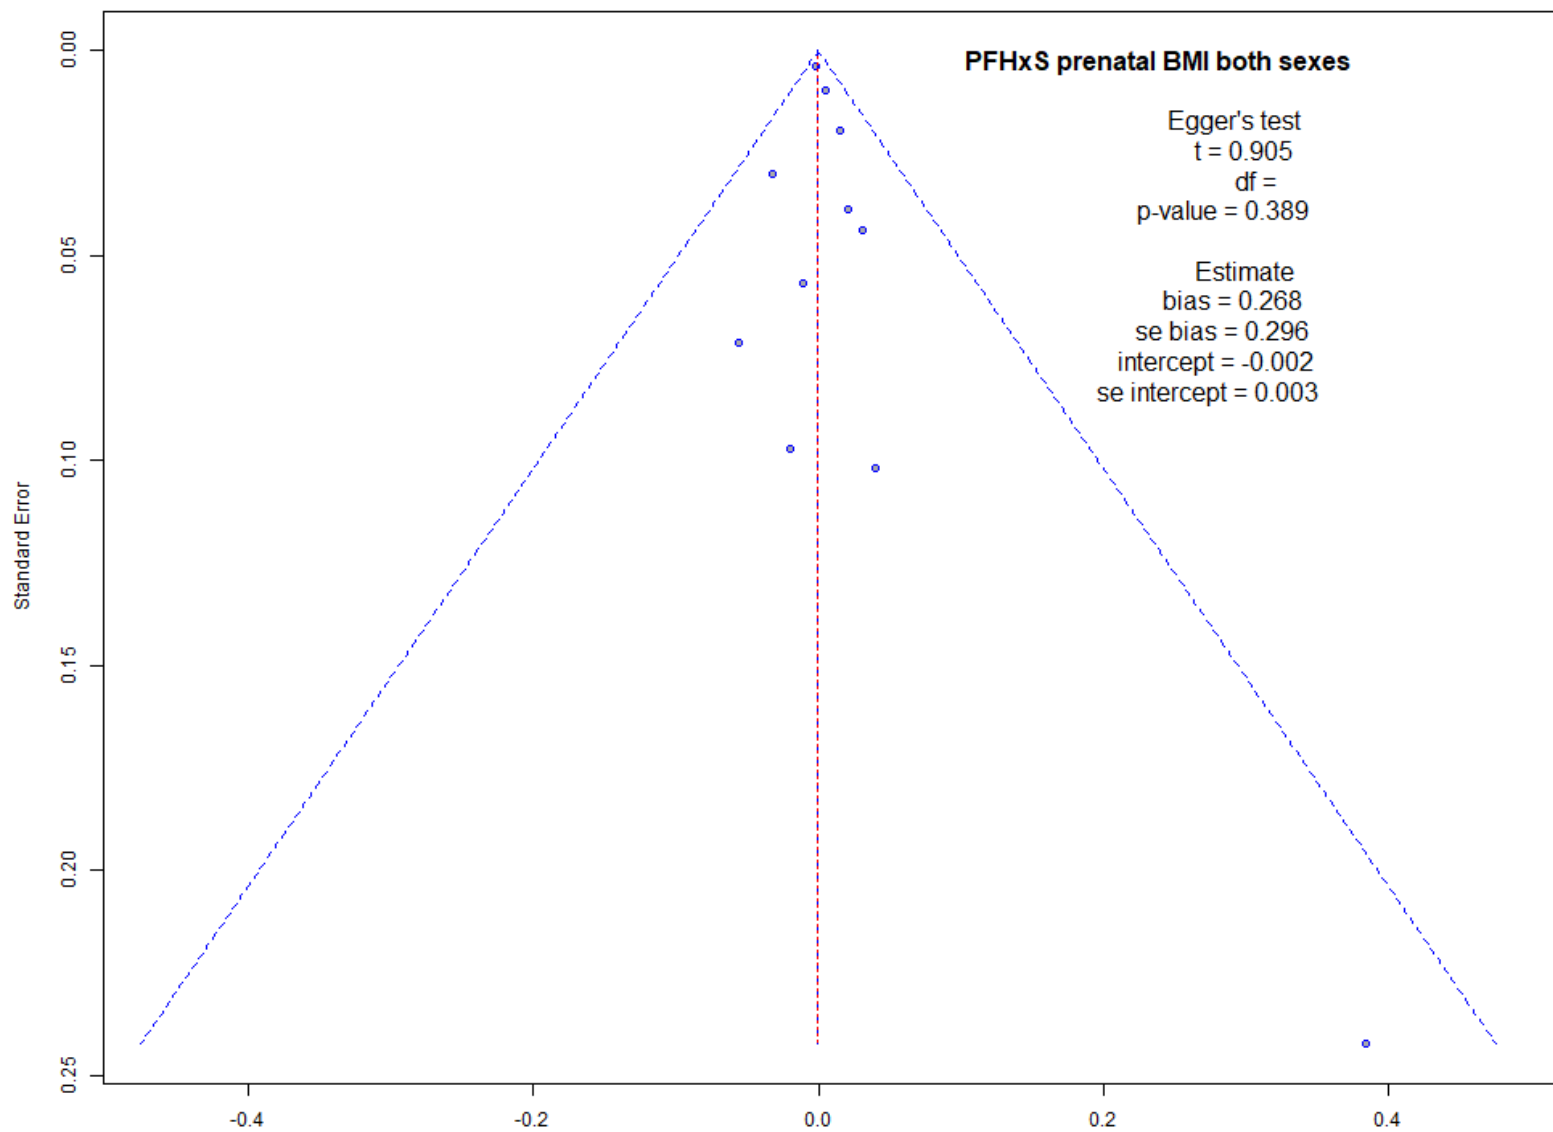

# Prenatal and childhood exposure to per-/polyfluoroalkyl substances (PFASs) and its associations with childhood overweight and/or obesity: a systematic review with meta-analyses

Gianfranco Frigerio, Chiara Matilde Ferrari, and Silvia Fustinoni

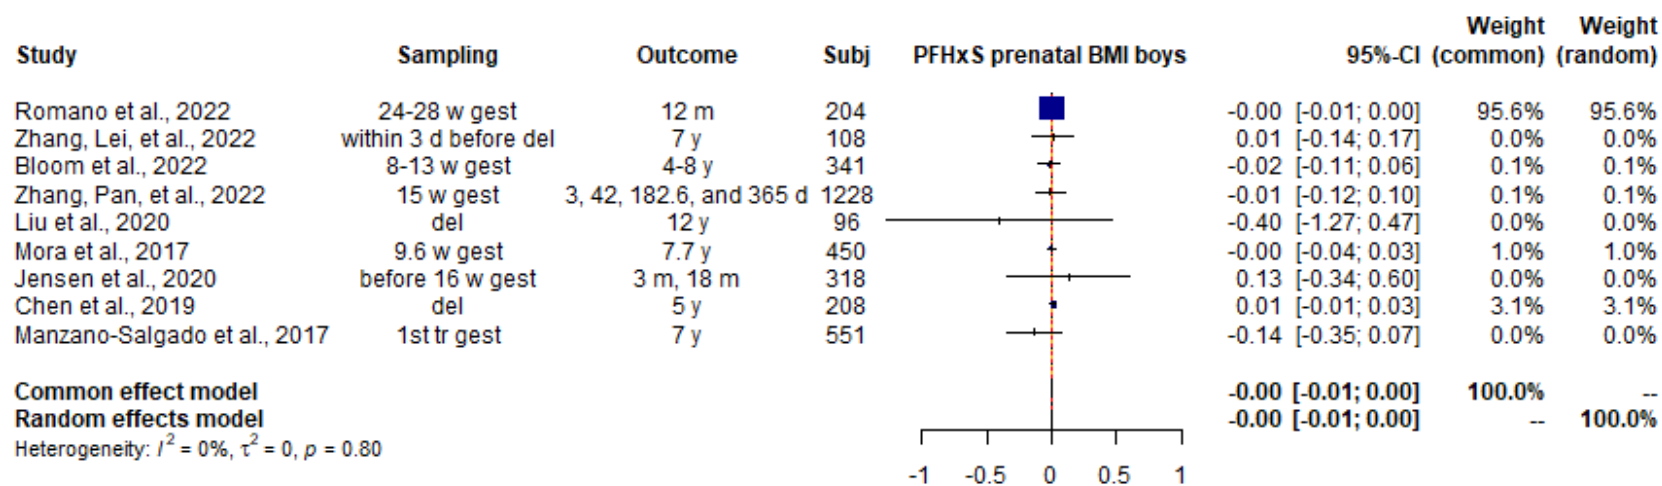

**Prenatal and childhood exposure to per-/polyfluoroalkyl substances (PFASs) and its associations with childhood overweight and/or obesity: a systematic review with meta-analyses**

Gianfranco Frigerio, Chiara Matilde Ferrari, and Silvia Fustinoni

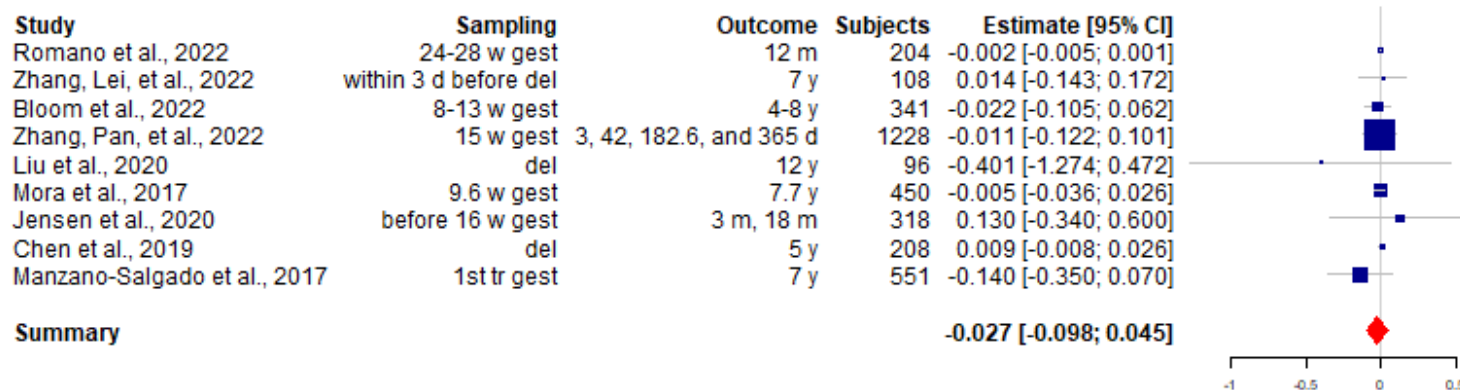



Prenatal and childhood exposure to per-/polyfluoroalkyl substances (PFASs) and its associations with childhood overweight and/or obesity: a systematic review with meta-analyses

Gianfranco Frigerio, Chiara Matilde Ferrari, and Silvia Fustinoni

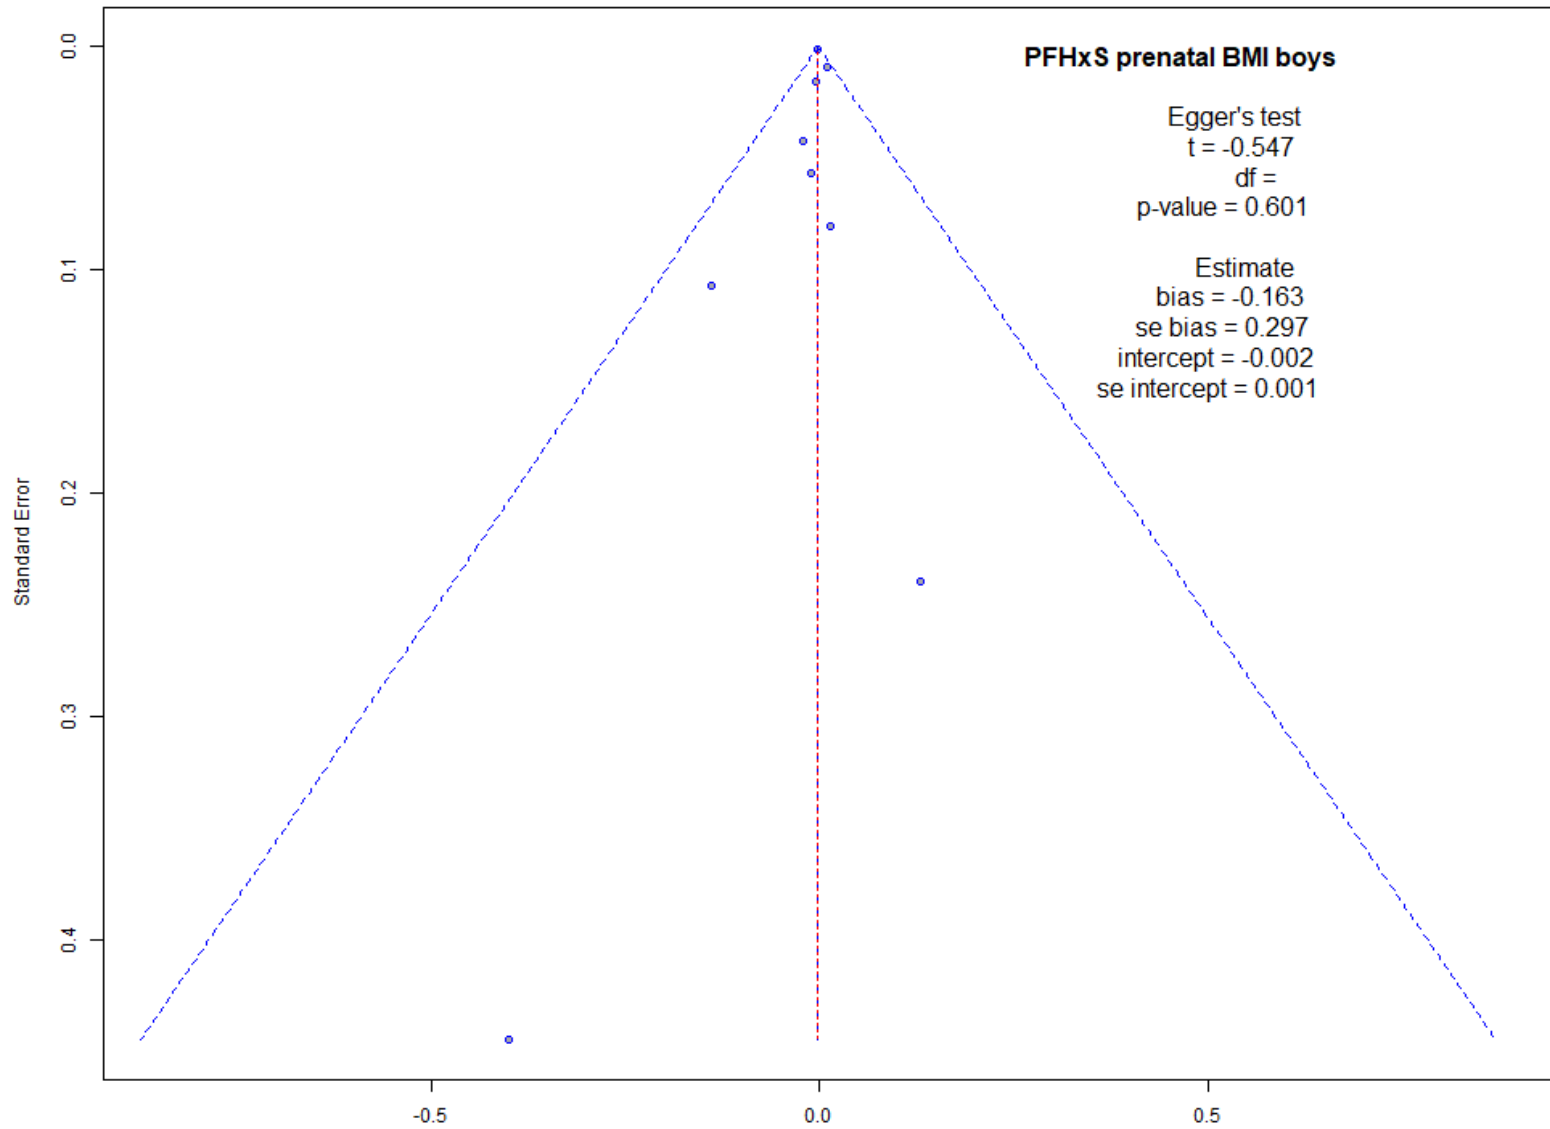

# Prenatal and childhood exposure to per-/polyfluoroalkyl substances (PFASs) and its associations with childhood overweight and/or obesity: a systematic review with meta-analyses

Gianfranco Frigerio, Chiara Matilde Ferrari, and Silvia Fustinoni

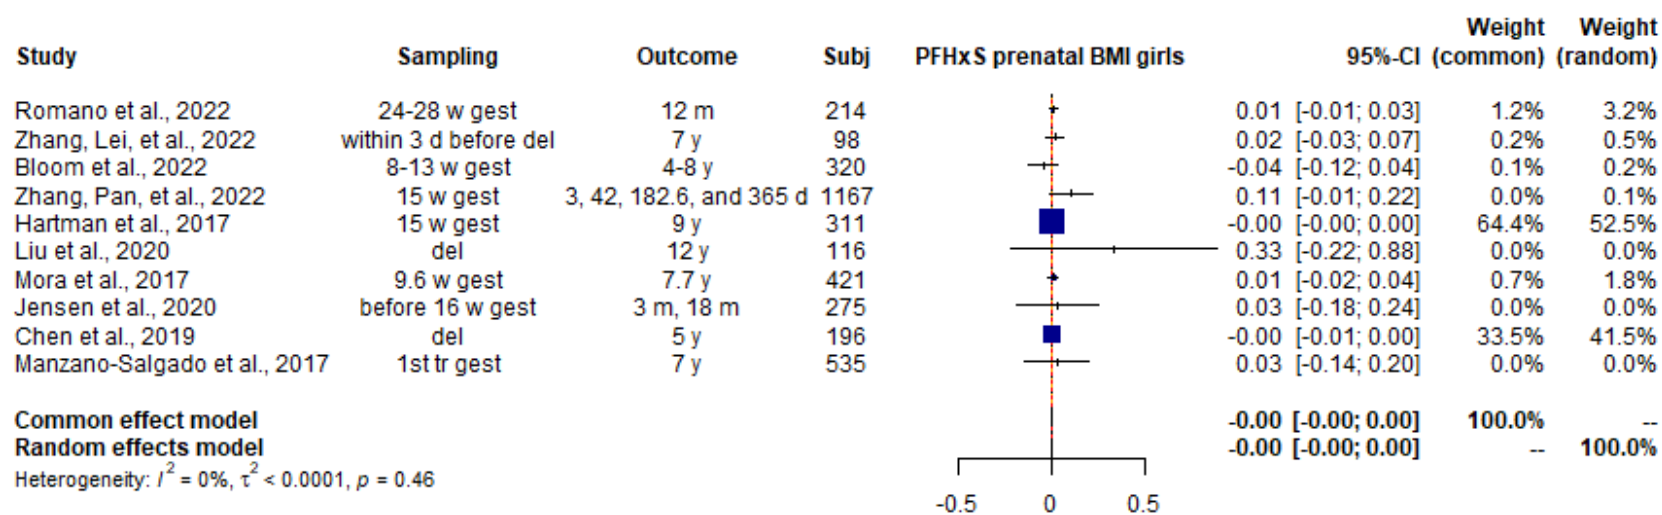

# Prenatal and childhood exposure to per-/polyfluoroalkyl substances (PFASs) and its associations with childhood overweight and/or obesity: a systematic review with meta-analyses

Gianfranco Frigerio, Chiara Matilde Ferrari, and Silvia Fustinoni

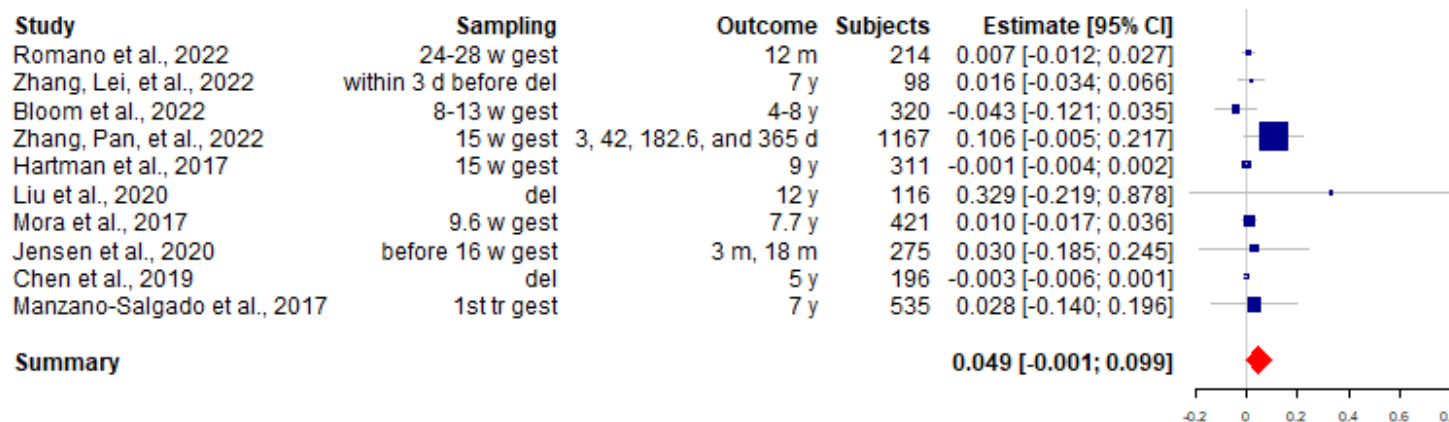

Prenatal and childhood exposure to per-/polyfluoroalkyl substances (PFASs) and its associations with childhood overweight and/or obesity: a systematic review with meta-analyses

Gianfranco Frigerio, Chiara Matilde Ferrari, and Silvia Fustinoni

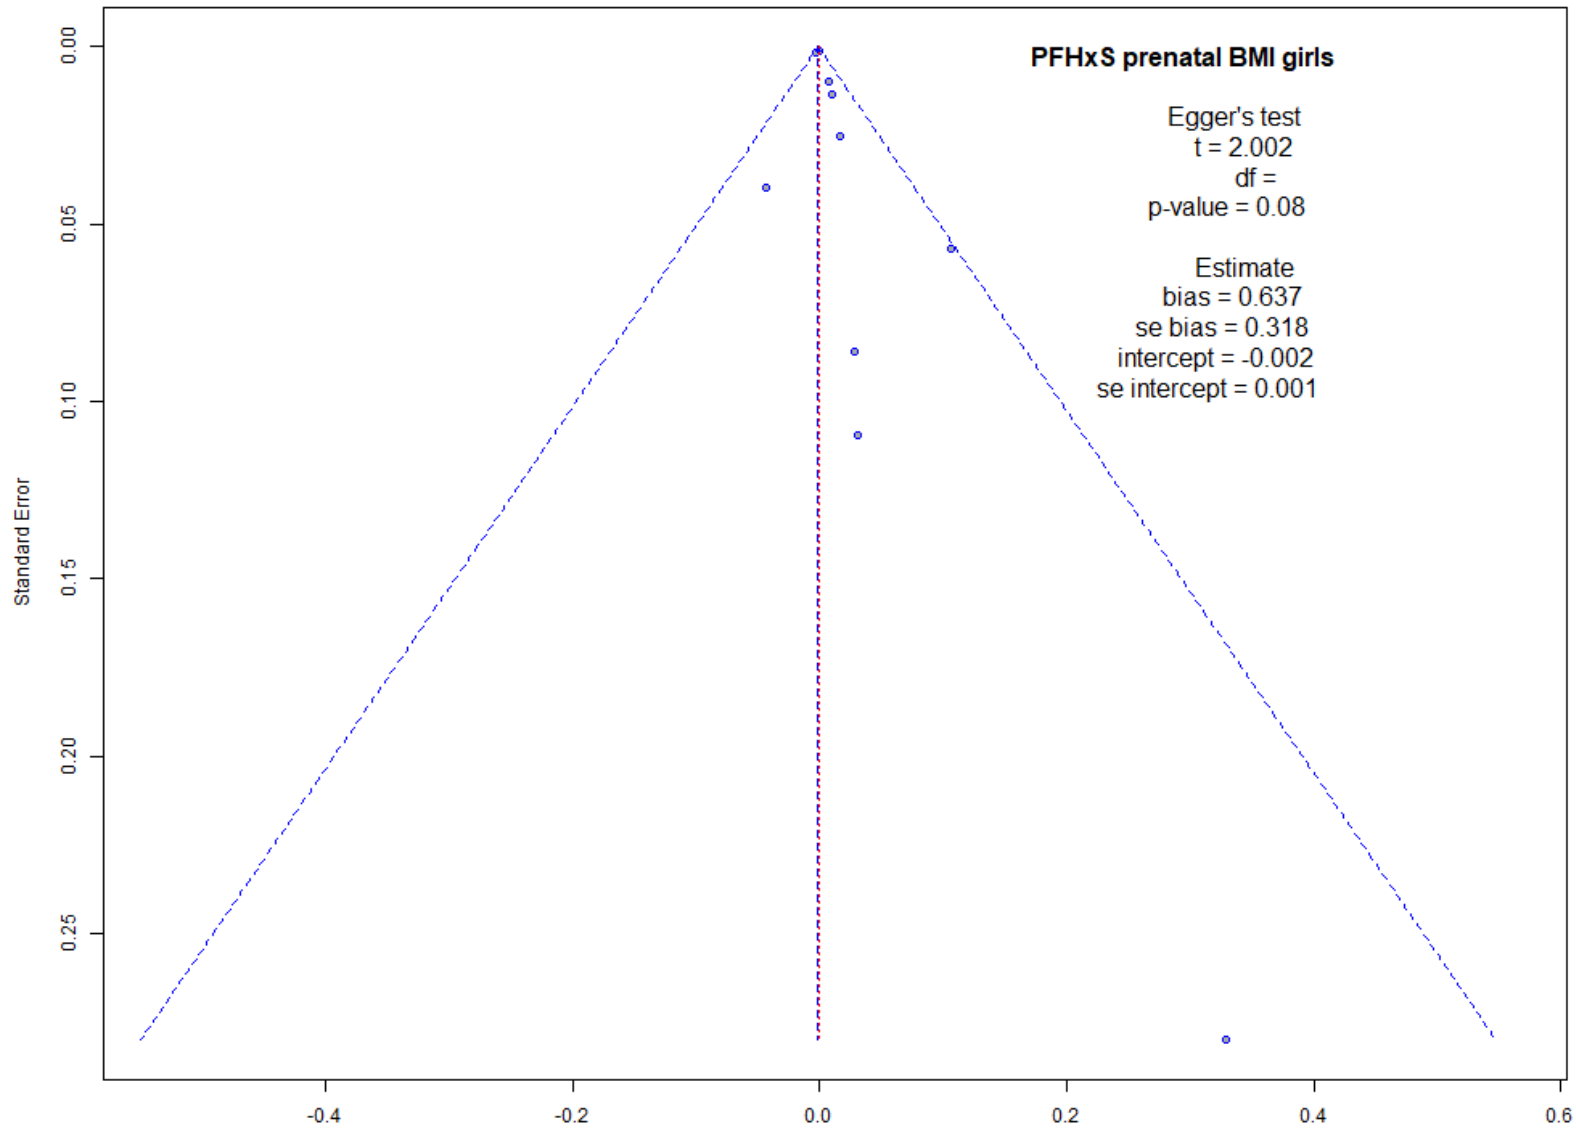

Prenatal and childhood exposure to per-/polyfluoroalkyl substances (PFASs) and its associations with childhood overweight and/or obesity: a systematic review with meta-analyses

Gianfranco Frigerio, Chiara Matilde Ferrari, and Silvia Fustinoni

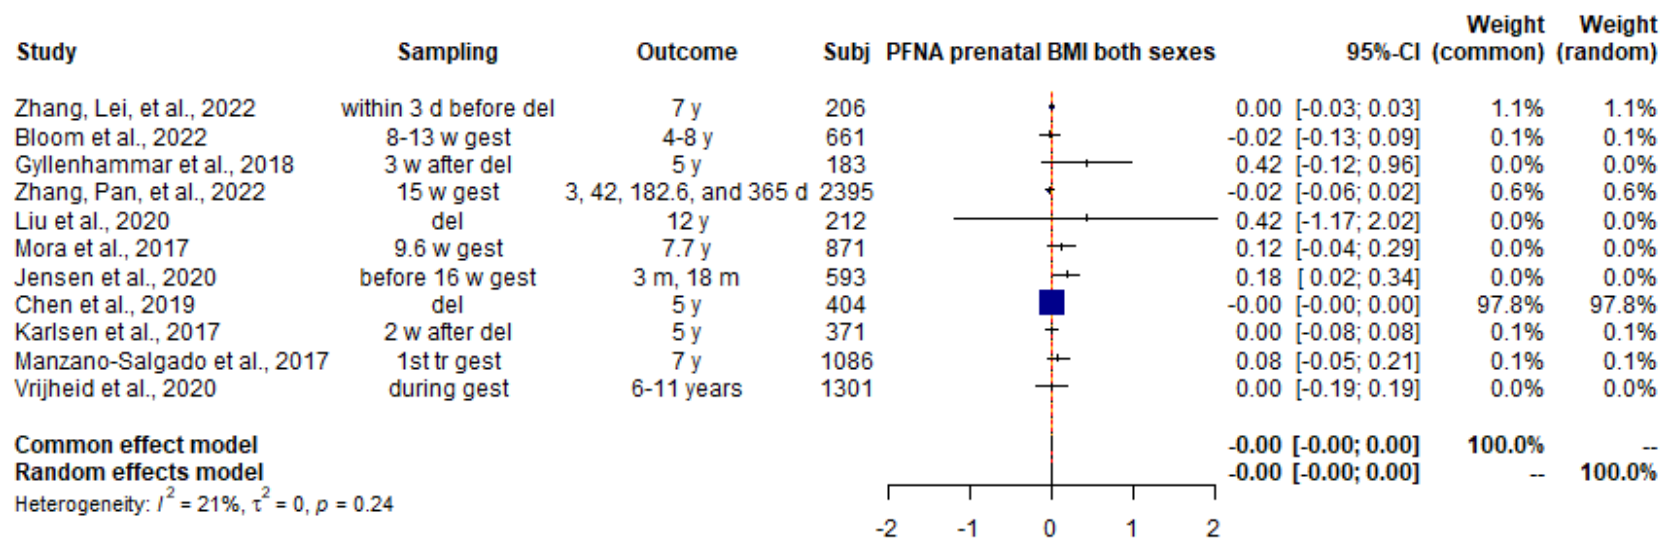

**Prenatal and childhood exposure to per-/polyfluoroalkyl substances (PFASs) and its associations with childhood overweight and/or obesity: a systematic review with meta-analyses**

Gianfranco Frigerio, Chiara Matilde Ferrari, and Silvia Fustinoni

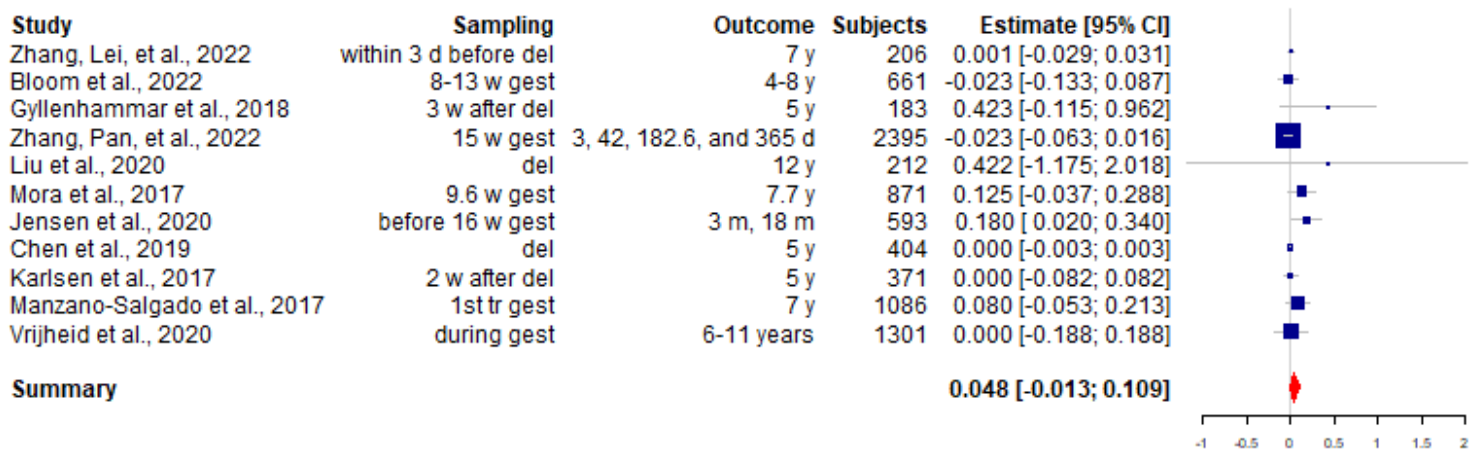

Prenatal and childhood exposure to per-/polyfluoroalkyl substances (PFASs) and its associations with childhood overweight and/or obesity: a systematic review with meta-analyses

Gianfranco Frigerio, Chiara Matilde Ferrari, and Silvia Fustinoni

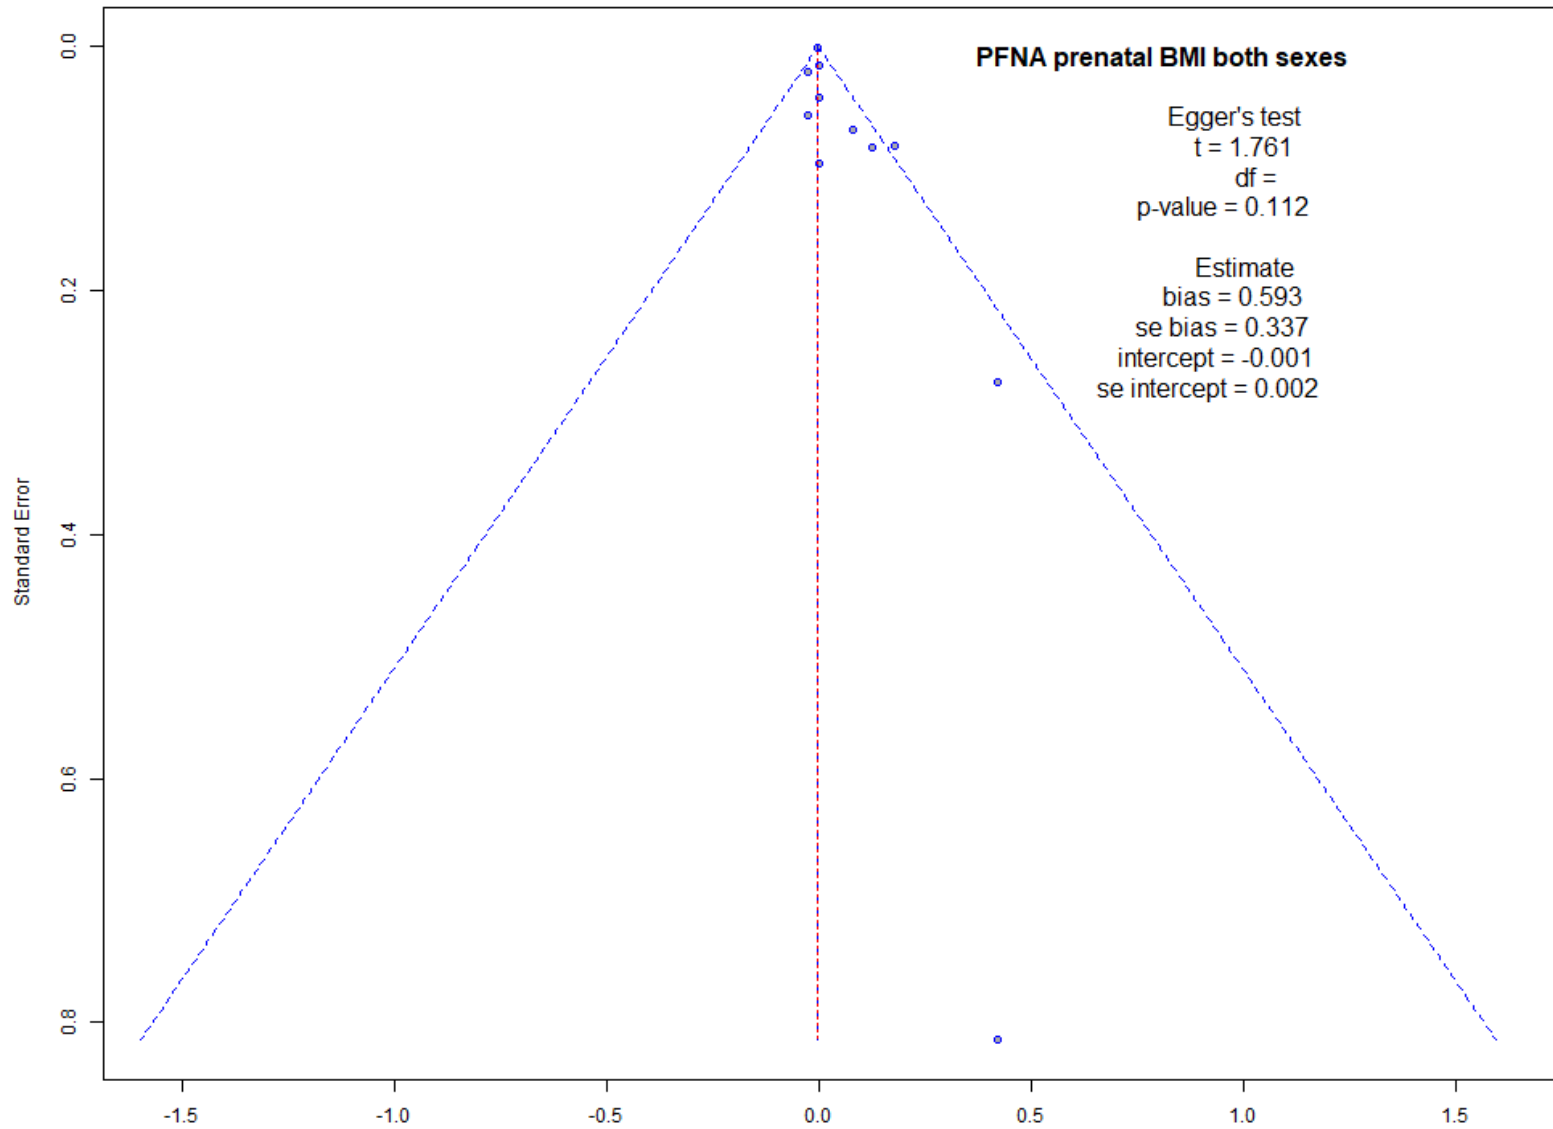

Prenatal and childhood exposure to per-/polyfluoroalkyl substances (PFASs) and its associations with childhood overweight and/or obesity: a systematic review with meta-analyses

Gianfranco Frigerio, Chiara Matilde Ferrari, and Silvia Fustinoni

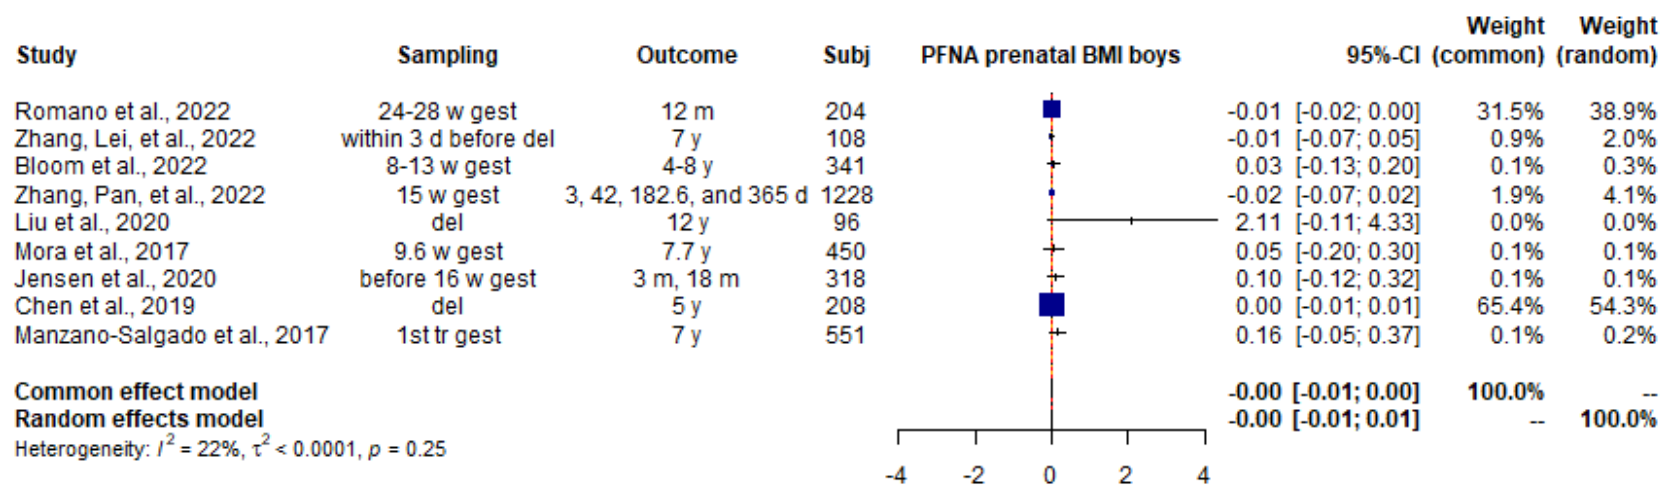



**Prenatal and childhood exposure to per-/polyfluoroalkyl substances (PFASs) and its associations with childhood overweight and/or obesity: a systematic review with meta-analyses**

Gianfranco Frigerio, Chiara Matilde Ferrari, and Silvia Fustinoni

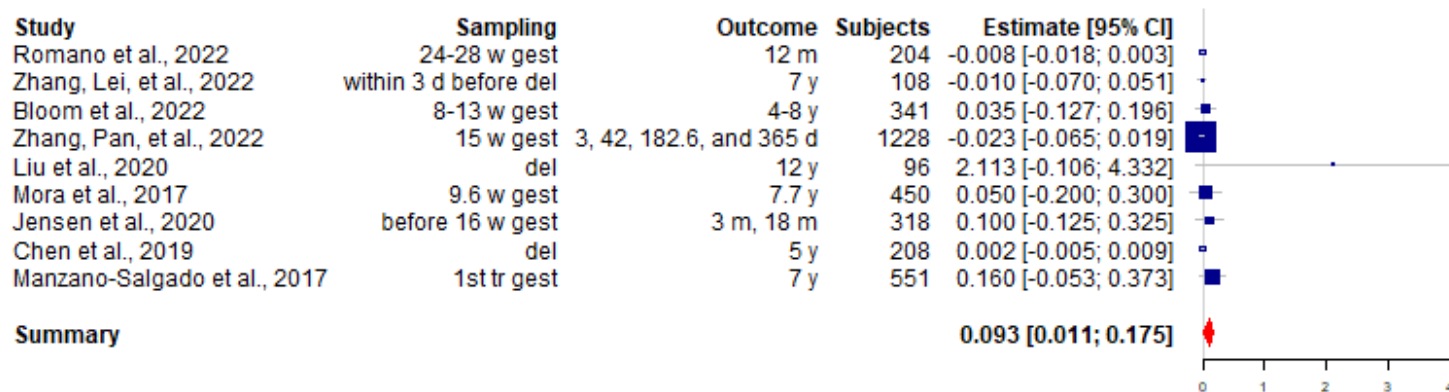

Prenatal and childhood exposure to per-/polyfluoroalkyl substances (PFASs) and its associations with childhood overweight and/or obesity: a systematic review with meta-analyses

Gianfranco Frigerio, Chiara Matilde Ferrari, and Silvia Fustinoni

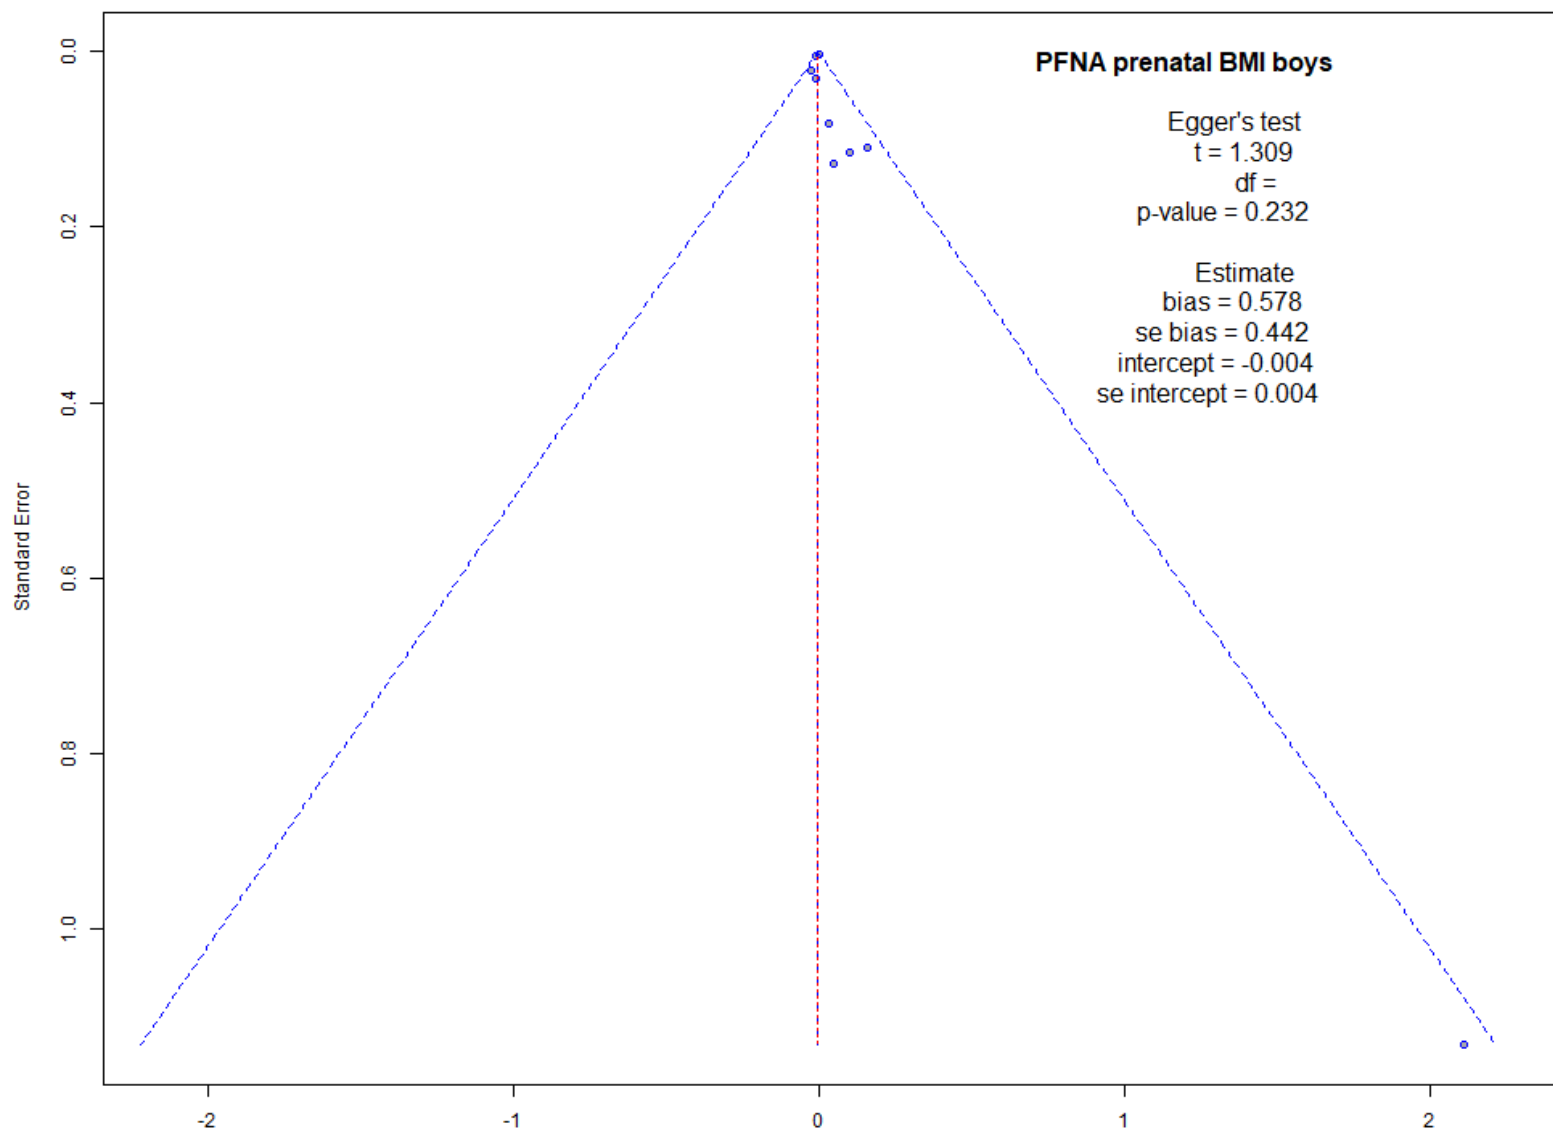

Prenatal and childhood exposure to per-/polyfluoroalkyl substances (PFASs) and its associations with childhood overweight and/or obesity: a systematic review with meta-analyses

Gianfranco Frigerio, Chiara Matilde Ferrari, and Silvia Fustinoni

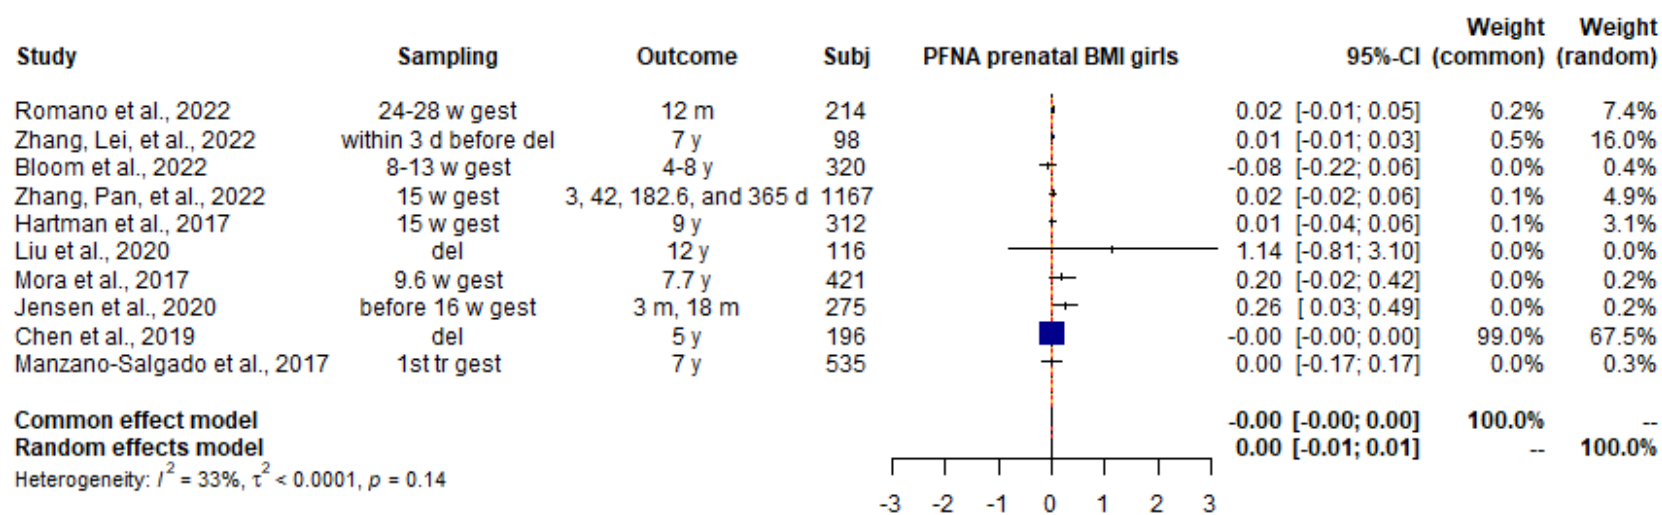

**Prenatal and childhood exposure to per-/polyfluoroalkyl substances (PFASs) and its associations with childhood overweight and/or obesity: a systematic review with meta-analyses**

Gianfranco Frigerio, Chiara Matilde Ferrari, and Silvia Fustinoni

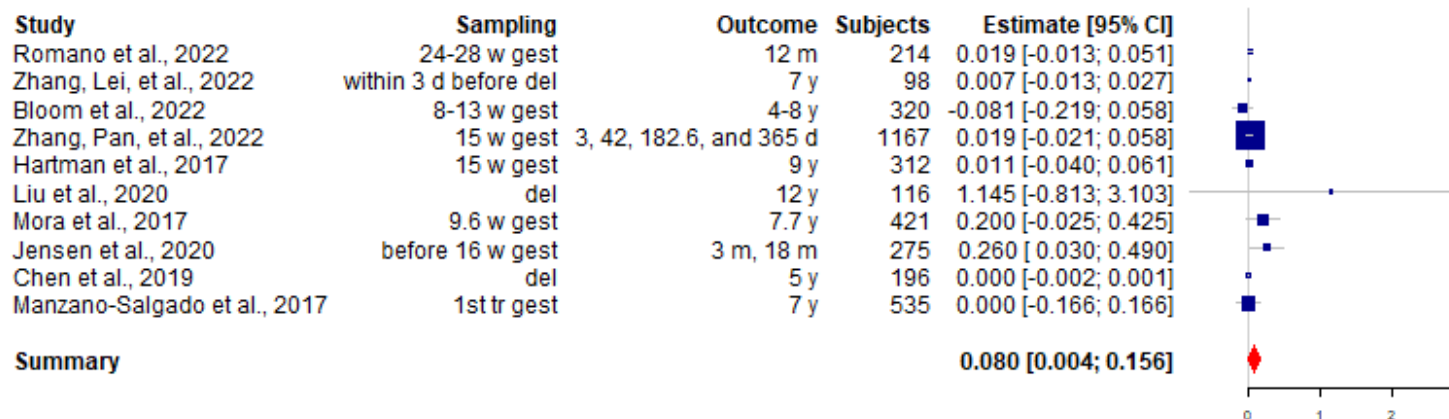

Prenatal and childhood exposure to per-/polyfluoroalkyl substances (PFASs) and its associations with childhood overweight and/or obesity: a systematic review with meta-analyses

Gianfranco Frigerio, Chiara Matilde Ferrari, and Silvia Fustinoni

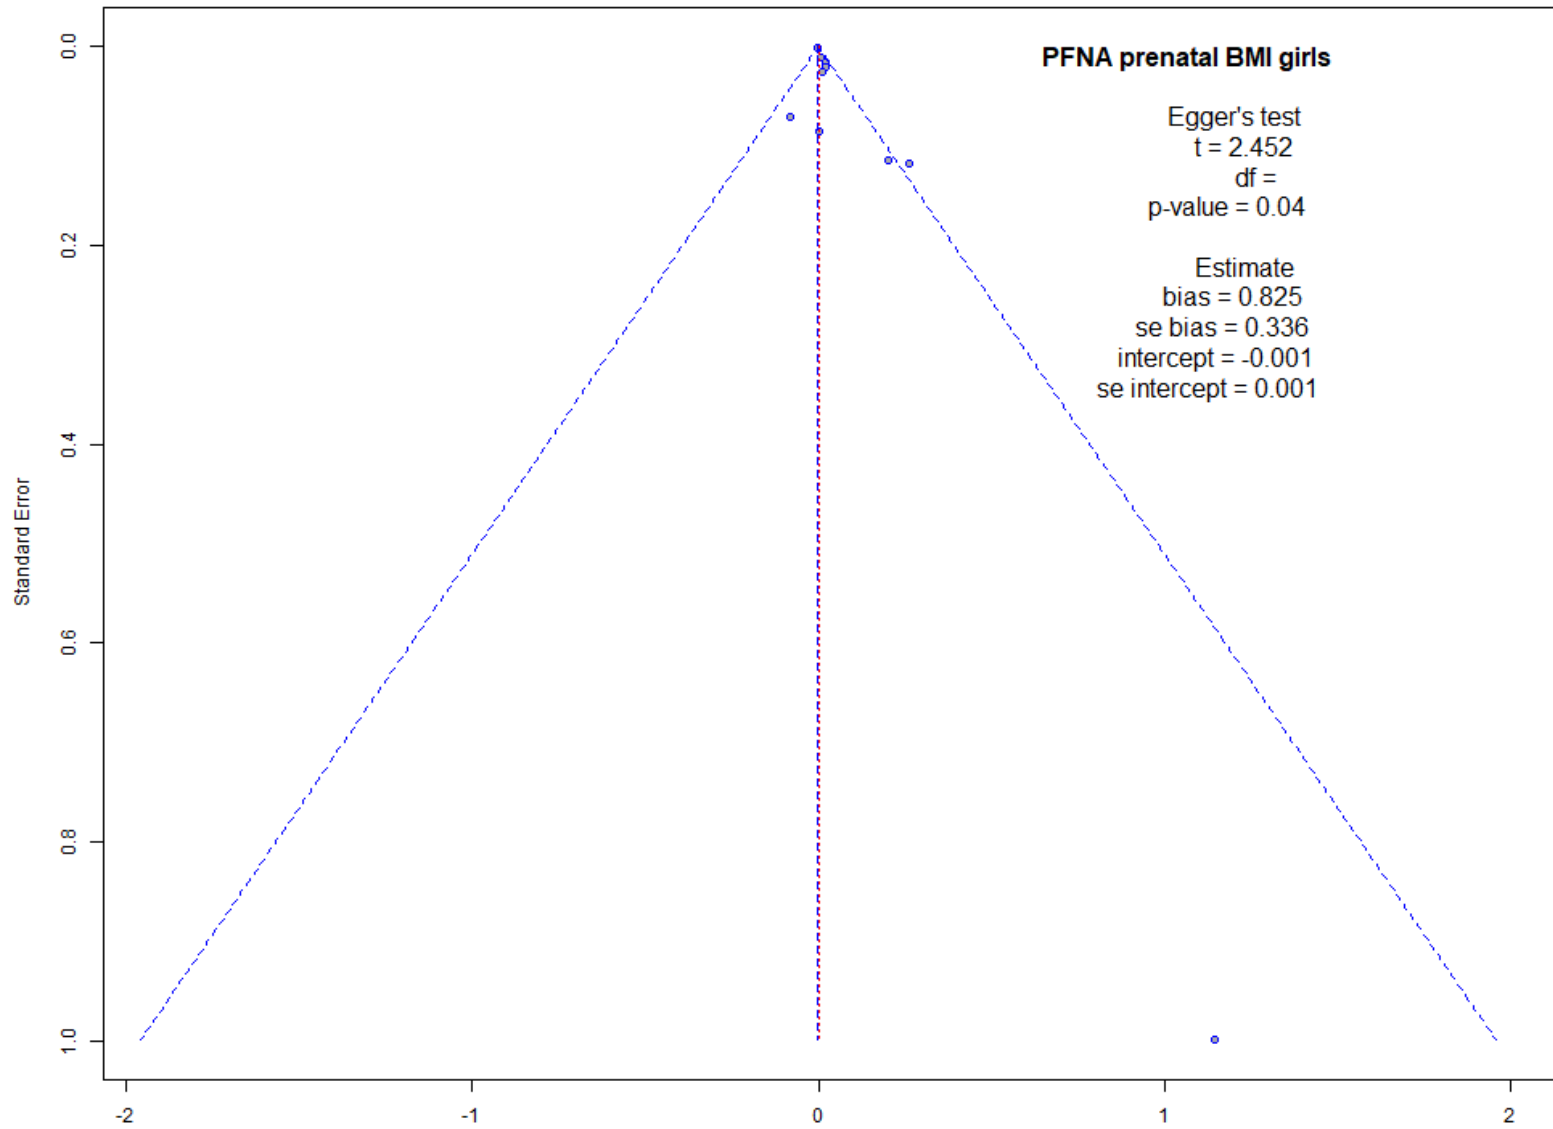

**Prenatal and childhood exposure to per-/polyfluoroalkyl substances (PFASs) and its associations with childhood overweight and/or obesity: a systematic review with meta-analyses**

Gianfranco Frigerio, Chiara Matilde Ferrari, and Silvia Fustinoni

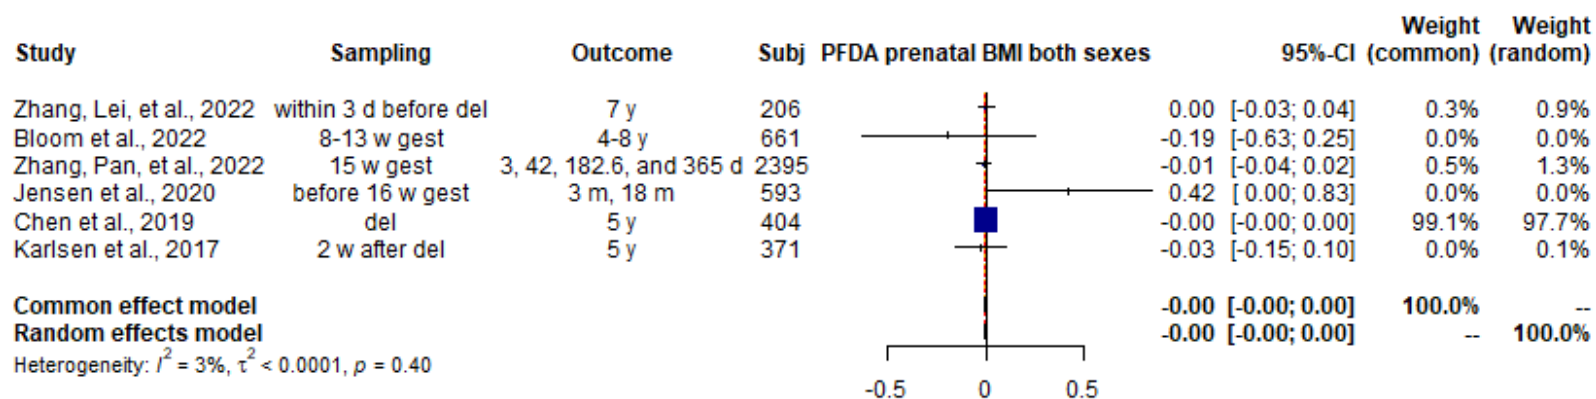

**Prenatal and childhood exposure to per-/polyfluoroalkyl substances (PFASs) and its associations with childhood overweight and/or obesity: a systematic review with meta-analyses**

Gianfranco Frigerio, Chiara Matilde Ferrari, and Silvia Fustinoni

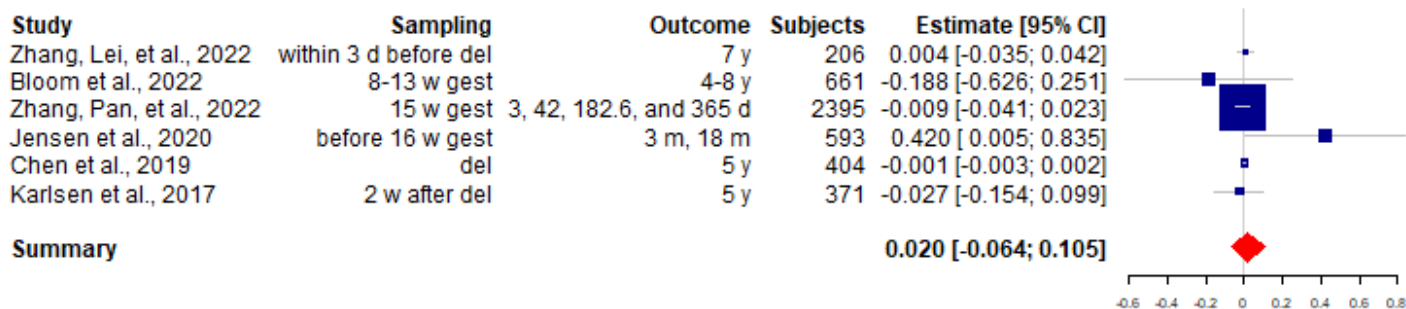

Prenatal and childhood exposure to per-/polyfluoroalkyl substances (PFASs) and its associations with childhood overweight and/or obesity: a systematic review with meta-analyses

Gianfranco Frigerio, Chiara Matilde Ferrari, and Silvia Fustinoni

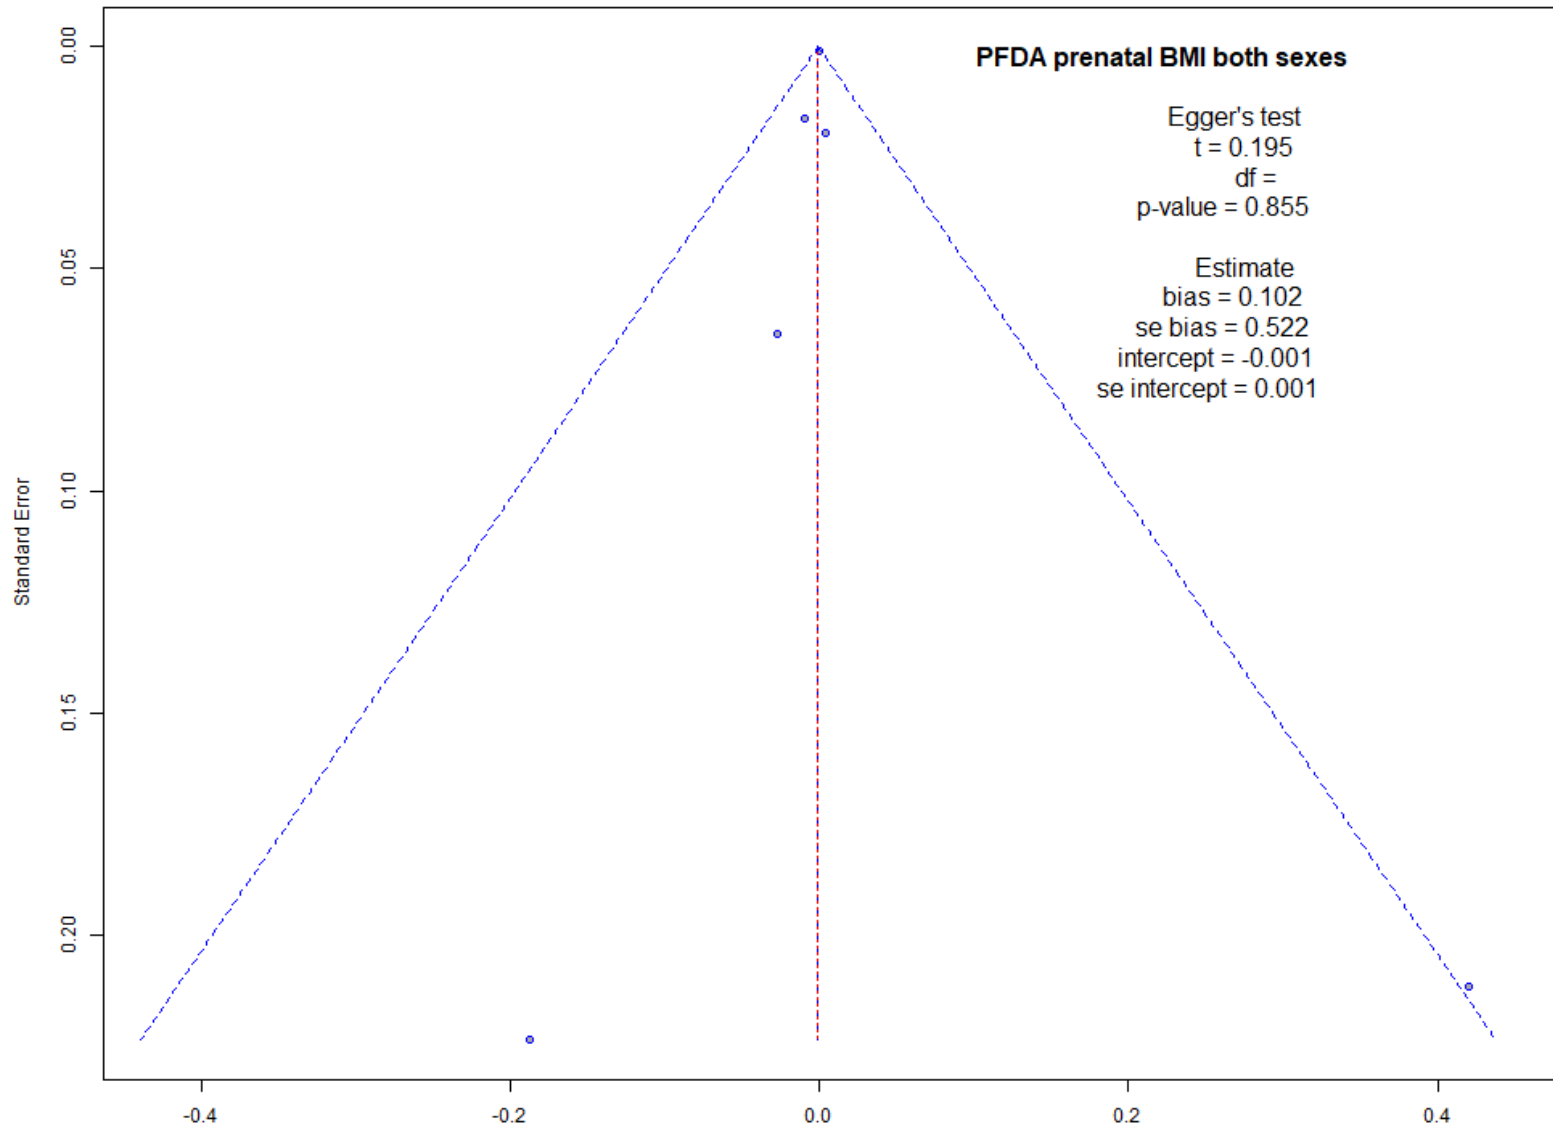



**Prenatal and childhood exposure to per-/polyfluoroalkyl substances (PFASs) and its associations with childhood overweight and/or obesity: a systematic review with meta-analyses**

Gianfranco Frigerio, Chiara Matilde Ferrari, and Silvia Fustinoni

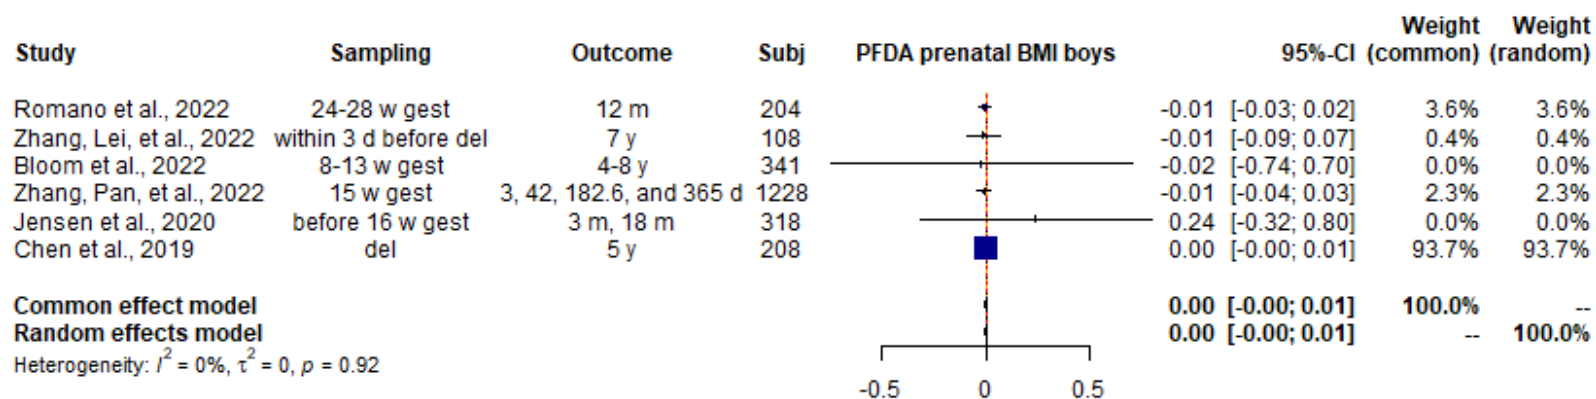

**Prenatal and childhood exposure to per-/polyfluoroalkyl substances (PFASs) and its associations with childhood overweight and/or obesity: a systematic review with meta-analyses**

Gianfranco Frigerio, Chiara Matilde Ferrari, and Silvia Fustinoni

| Study                    | Sampling              | Outcome                 | Subjects | Estimate [95% CI]            |
|--------------------------|-----------------------|-------------------------|----------|------------------------------|
| Romano et al., 2022      | 24-28 w gest          | 12 m                    | 204      | -0.006 [-0.034; 0.022]       |
| Zhang, Lei, et al., 2022 | within 3 d before del | 7 y                     | 108      | -0.011 [-0.091; 0.069]       |
| Bloom et al., 2022       | 8-13 w gest           | 4-8 y                   | 341      | -0.019 [-0.739; 0.702]       |
| Zhang, Pan, et al., 2022 | 15 w gest             | 3, 42, 182.6, and 365 d | 1228     | -0.009 [-0.044; 0.025]       |
| Jensen et al., 2020      | before 16 w gest      | 3 m, 18 m               | 318      | 0.240 [-0.315; 0.795]        |
| Chen et al., 2019        | del                   | 5 y                     | 208      | 0.002 [-0.004; 0.007]        |
| <b>Summary</b>           |                       |                         |          | <b>0.023 [-0.103; 0.150]</b> |

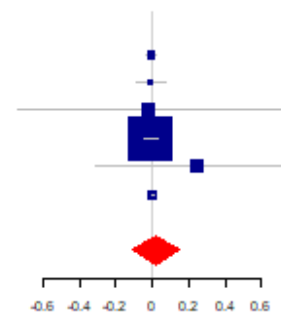

Prenatal and childhood exposure to per-/polyfluoroalkyl substances (PFASs) and its associations with childhood overweight and/or obesity: a systematic review with meta-analyses

Gianfranco Frigerio, Chiara Matilde Ferrari, and Silvia Fustinoni

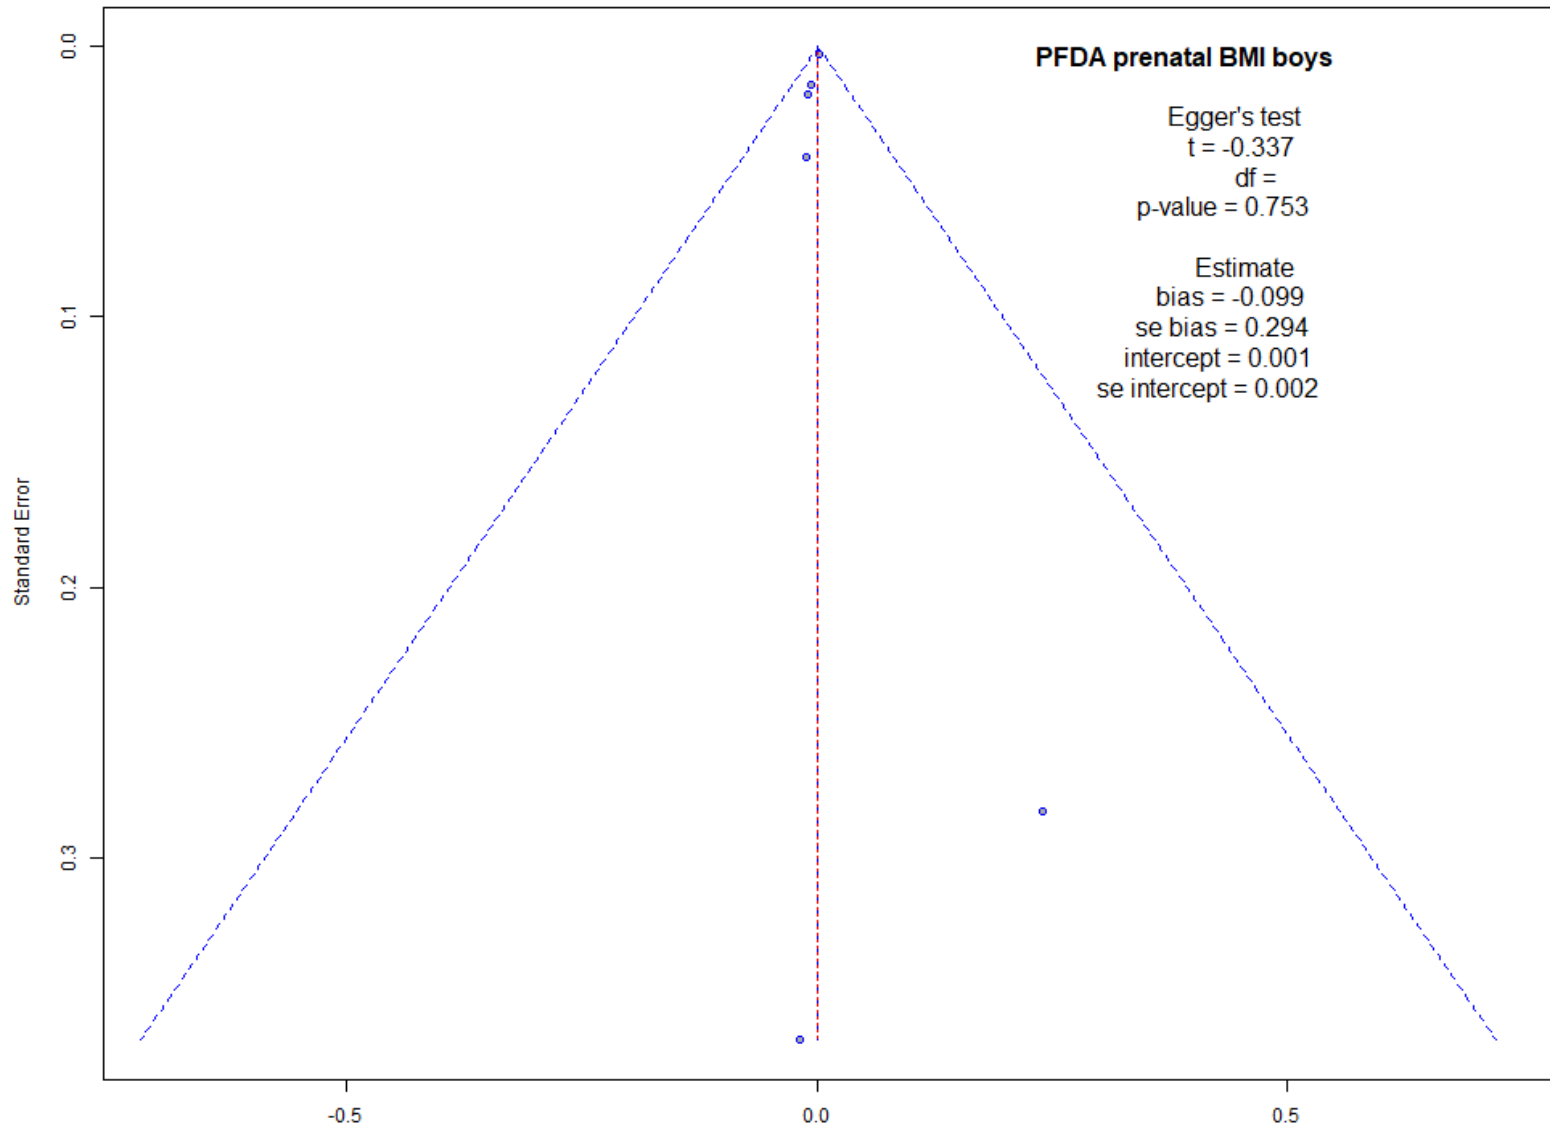

**Prenatal and childhood exposure to per-/polyfluoroalkyl substances (PFASs) and its associations with childhood overweight and/or obesity: a systematic review with meta-analyses**

Gianfranco Frigerio, Chiara Matilde Ferrari, and Silvia Fustinoni

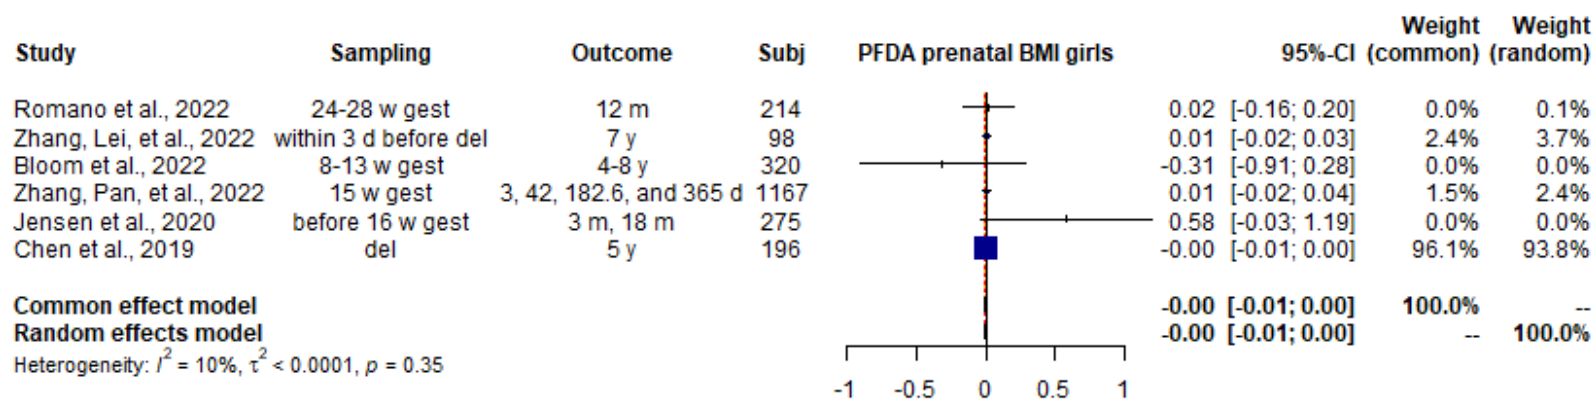

# Prenatal and childhood exposure to per-/polyfluoroalkyl substances (PFASs) and its associations with childhood overweight and/or obesity: a systematic review with meta-analyses

Gianfranco Frigerio, Chiara Matilde Ferrari, and Silvia Fustinoni

| Study                    | Sampling              | Outcome                 | Subjects | Estimate [95% CI]            |
|--------------------------|-----------------------|-------------------------|----------|------------------------------|
| Romano et al., 2022      | 24-28 w gest          | 12 m                    | 214      | 0.021 [-0.156; 0.197]        |
| Zhang, Lei, et al., 2022 | within 3 d before del | 7 y                     | 98       | 0.007 [-0.018; 0.033]        |
| Bloom et al., 2022       | 8-13 w gest           | 4-8 y                   | 320      | -0.313 [-0.908; 0.282]       |
| Zhang, Pan, et al., 2022 | 15 w gest             | 3, 42, 182.6, and 365 d | 1167     | 0.009 [-0.023; 0.041]        |
| Jensen et al., 2020      | before 16 w gest      | 3 m, 18 m               | 275      | 0.580 [-0.030; 1.190]        |
| Chen et al., 2019        | del                   | 5 y                     | 196      | -0.002 [-0.006; 0.002]       |
| <b>Summary</b>           |                       |                         |          | <b>0.033 [-0.081; 0.147]</b> |

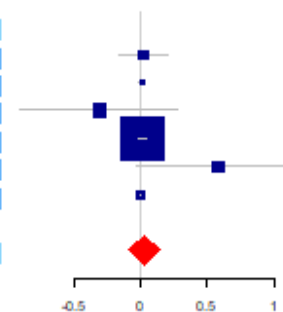

Prenatal and childhood exposure to per-/polyfluoroalkyl substances (PFASs) and its associations with childhood overweight and/or obesity: a systematic review with meta-analyses

Gianfranco Frigerio, Chiara Matilde Ferrari, and Silvia Fustinoni

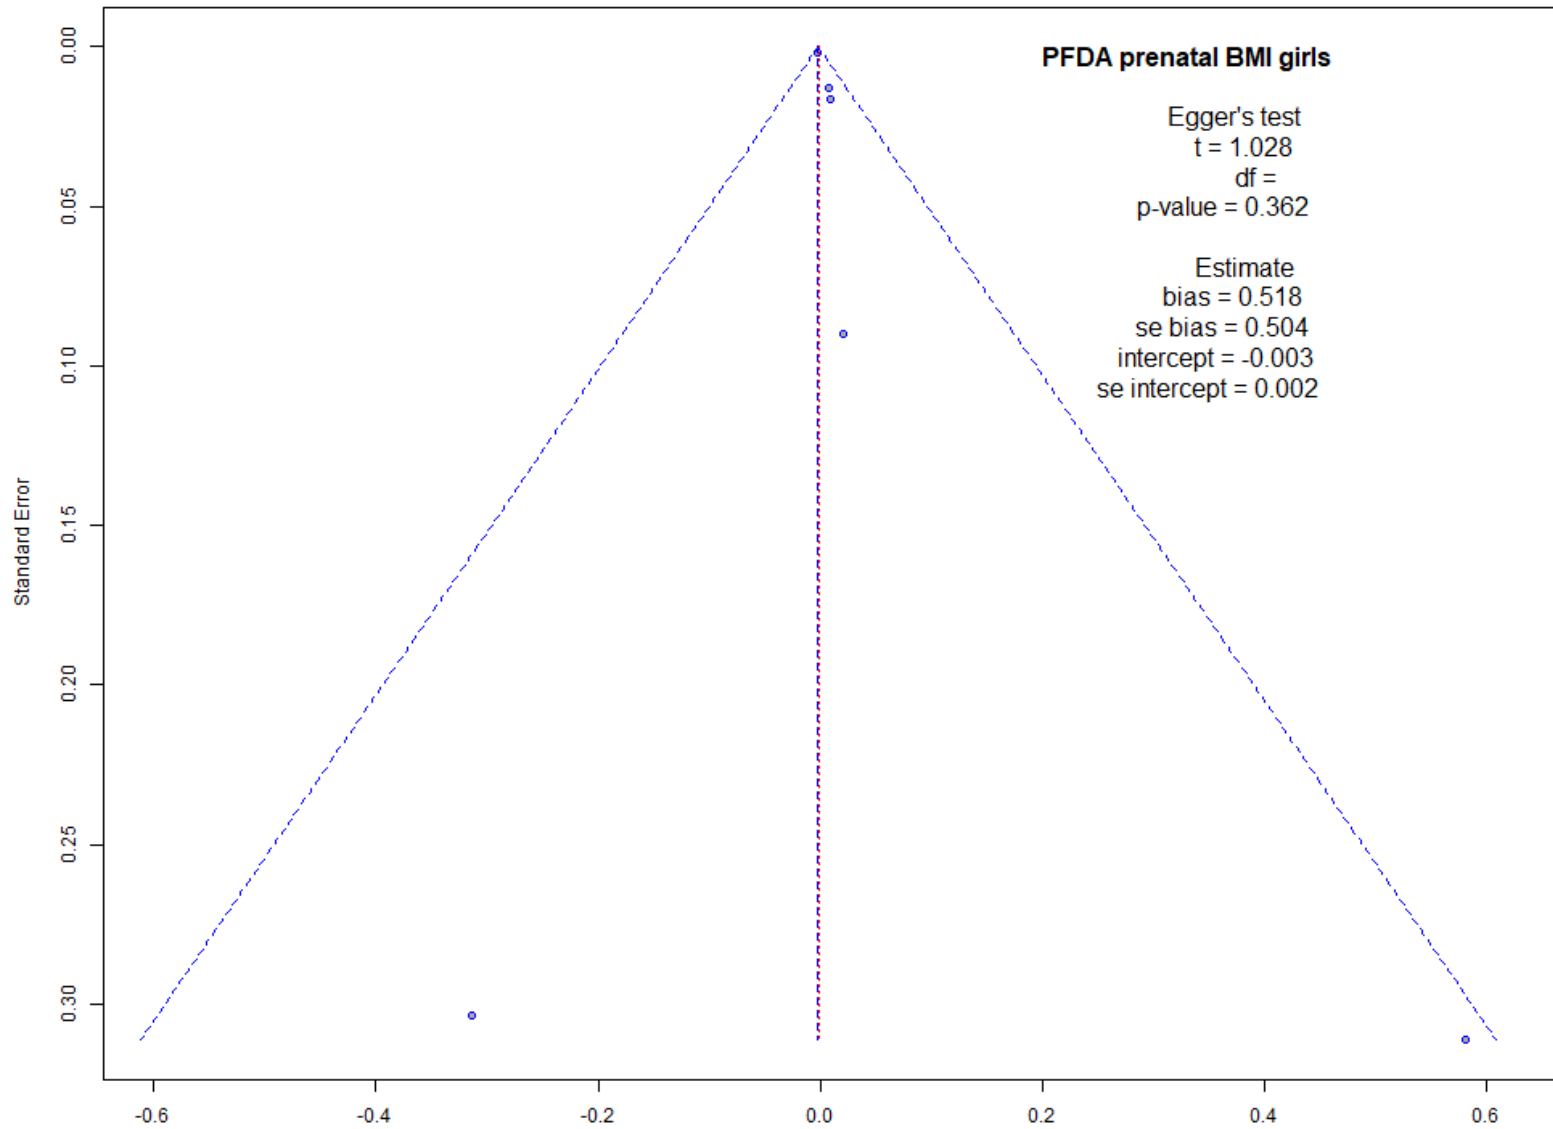

**Prenatal and childhood exposure to per-/polyfluoroalkyl substances (PFASs) and its associations with childhood overweight and/or obesity: a systematic review with meta-analyses**

Gianfranco Frigerio, Chiara Matilde Ferrari, and Silvia Fustinoni

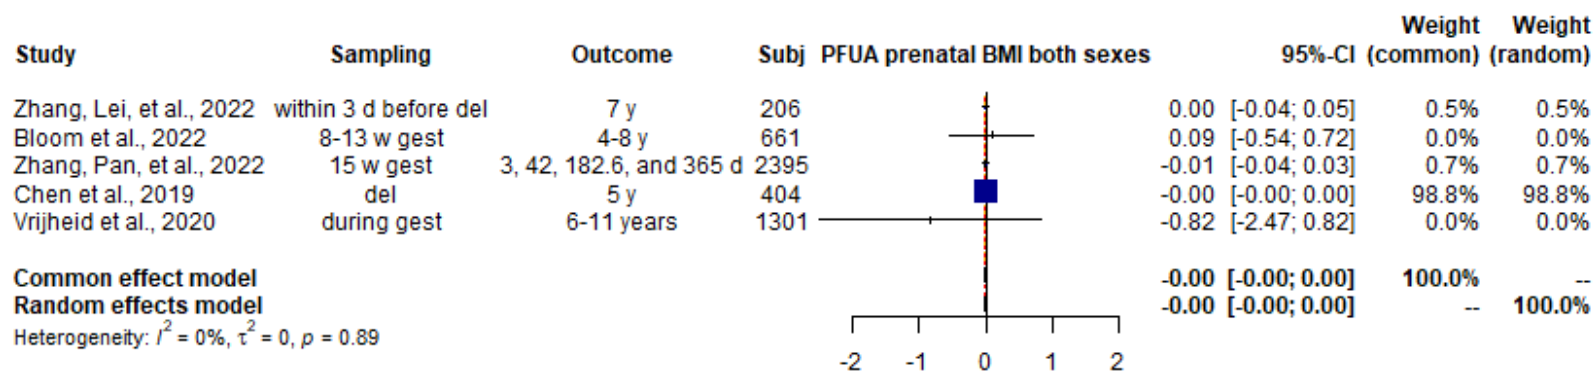

**Prenatal and childhood exposure to per-/polyfluoroalkyl substances (PFASs) and its associations with childhood overweight and/or obesity: a systematic review with meta-analyses**

Gianfranco Frigerio, Chiara Matilde Ferrari, and Silvia Fustinoni

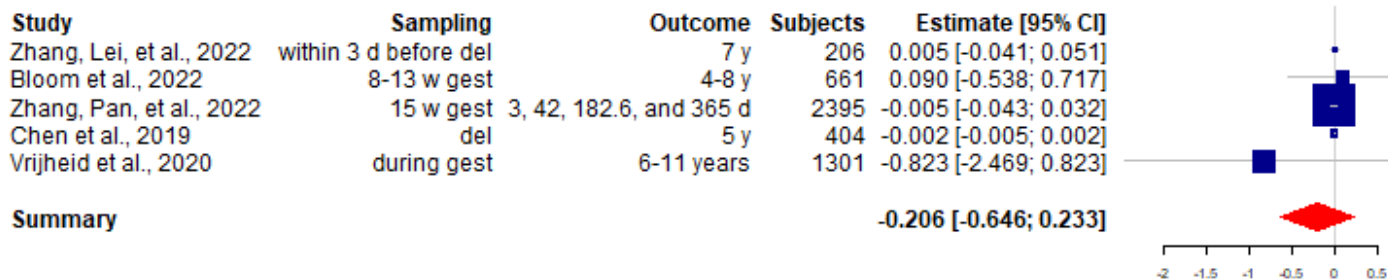



Prenatal and childhood exposure to per-/polyfluoroalkyl substances (PFASs) and its associations with childhood overweight and/or obesity: a systematic review with meta-analyses

Gianfranco Frigerio, Chiara Matilde Ferrari, and Silvia Fustinoni

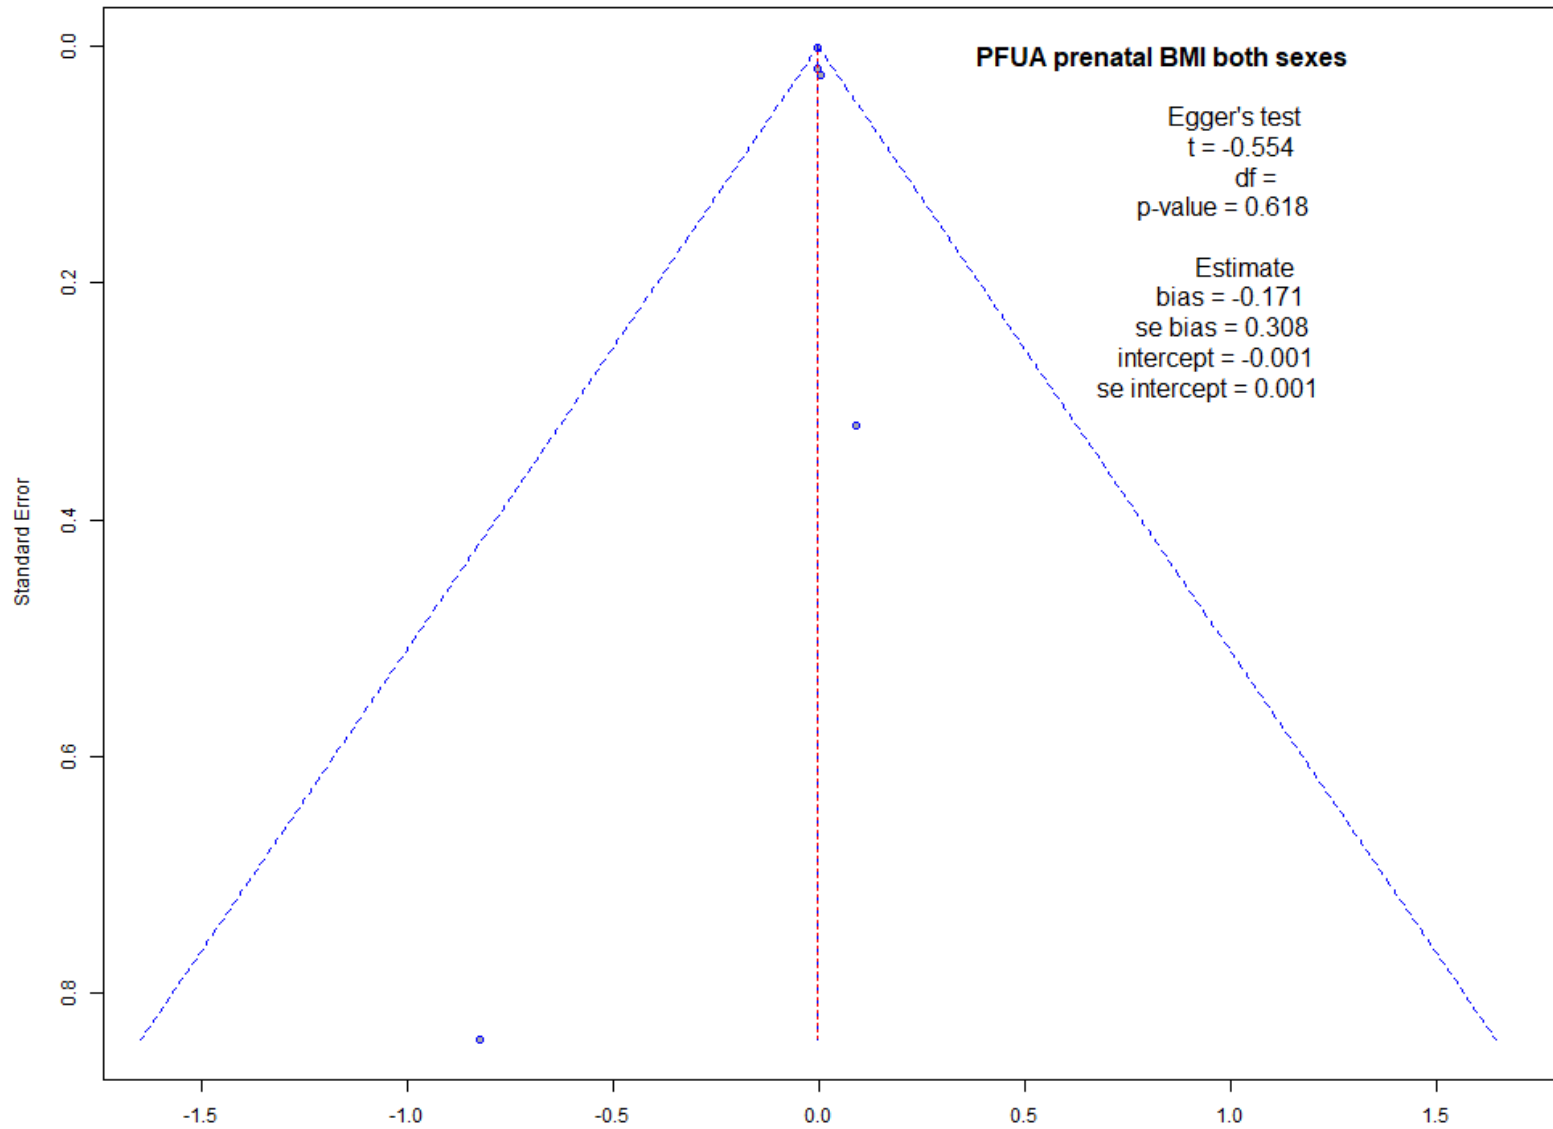

**Prenatal and childhood exposure to per-/polyfluoroalkyl substances (PFASs) and its associations with childhood overweight and/or obesity: a systematic review with meta-analyses**

Gianfranco Frigerio, Chiara Matilde Ferrari, and Silvia Fustinoni

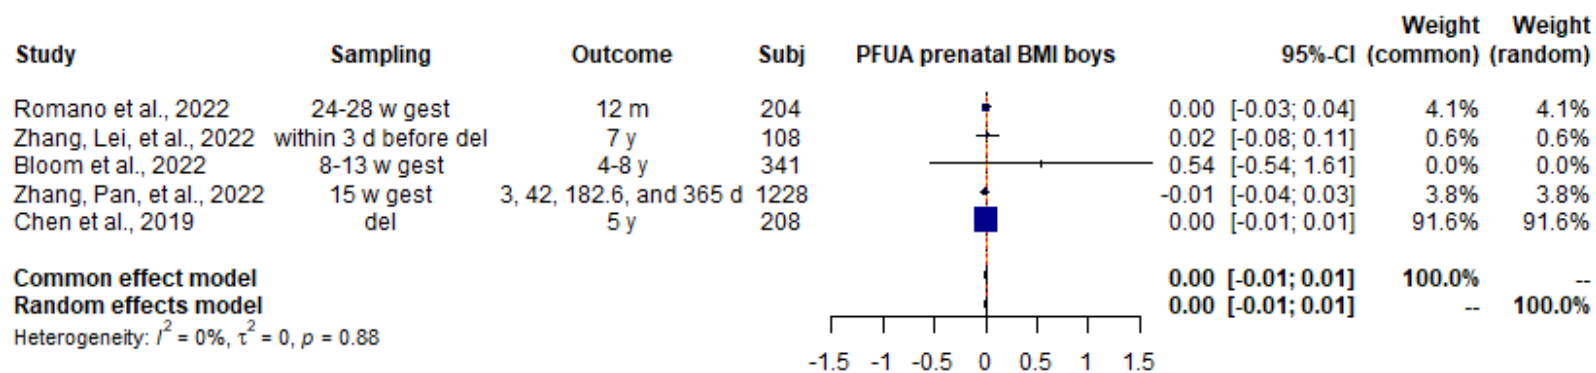

# Prenatal and childhood exposure to per-/polyfluoroalkyl substances (PFASs) and its associations with childhood overweight and/or obesity: a systematic review with meta-analyses

Gianfranco Frigerio, Chiara Matilde Ferrari, and Silvia Fustinoni

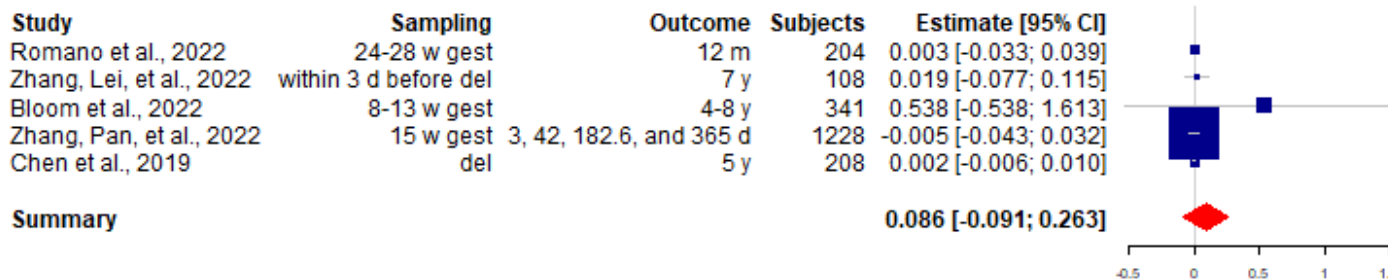

Prenatal and childhood exposure to per-/polyfluoroalkyl substances (PFASs) and its associations with childhood overweight and/or obesity: a systematic review with meta-analyses

Gianfranco Frigerio, Chiara Matilde Ferrari, and Silvia Fustinoni

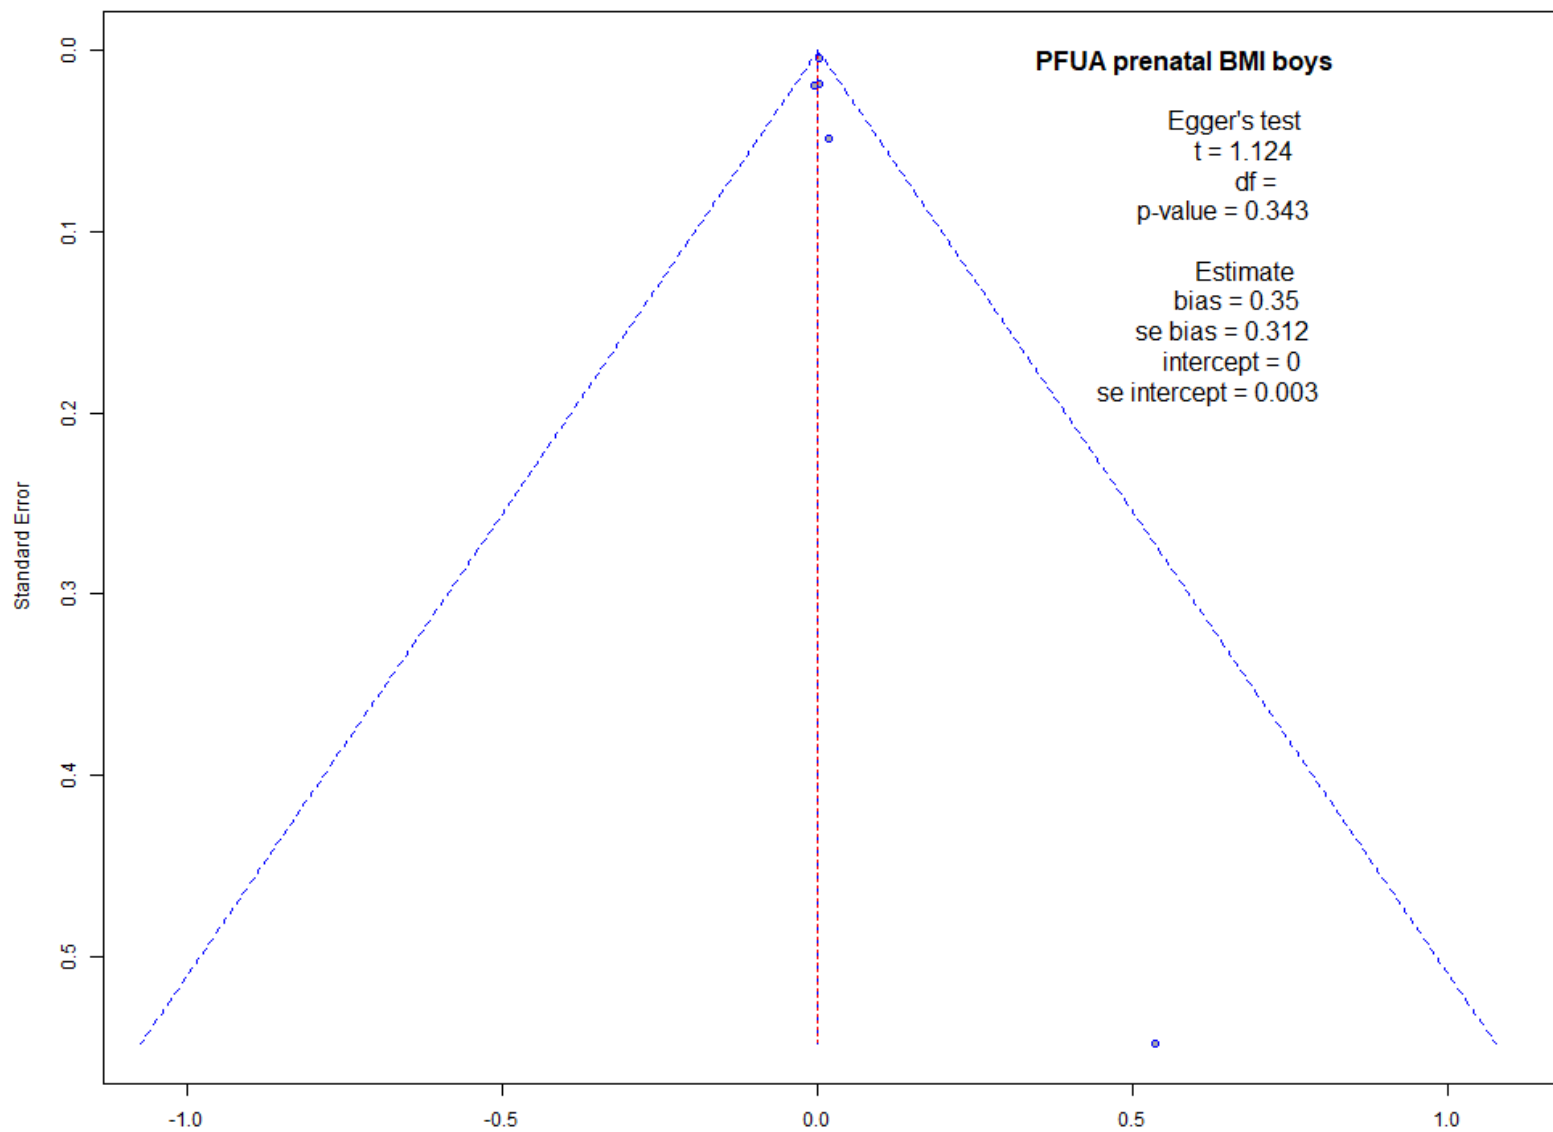

Prenatal and childhood exposure to per-/polyfluoroalkyl substances (PFASs) and its associations with childhood overweight and/or obesity: a systematic review with meta-analyses

Gianfranco Frigerio, Chiara Matilde Ferrari, and Silvia Fustinoni

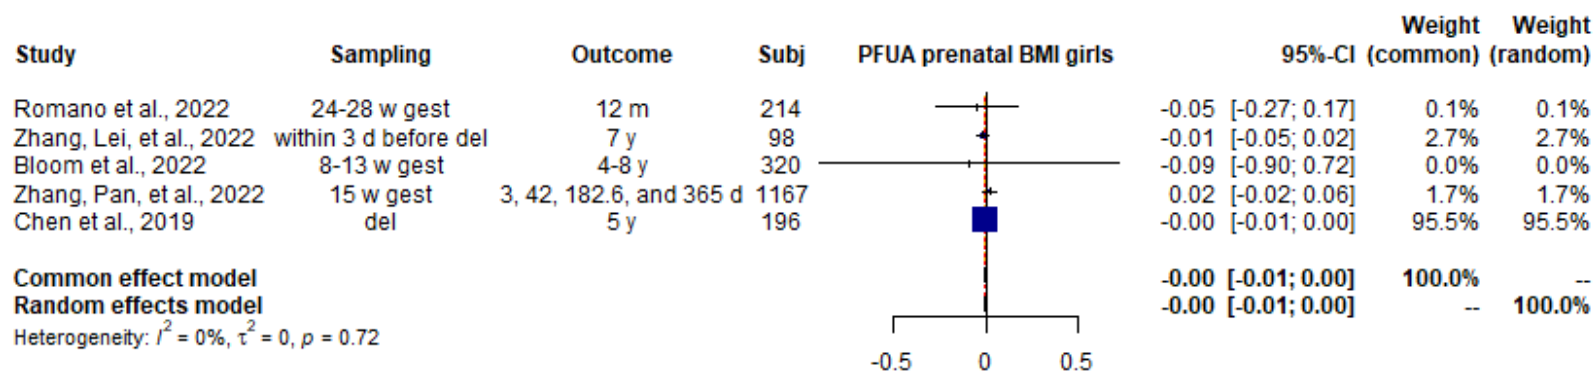

# Prenatal and childhood exposure to per-/polyfluoroalkyl substances (PFASs) and its associations with childhood overweight and/or obesity: a systematic review with meta-analyses

Gianfranco Frigerio, Chiara Matilde Ferrari, and Silvia Fustinoni

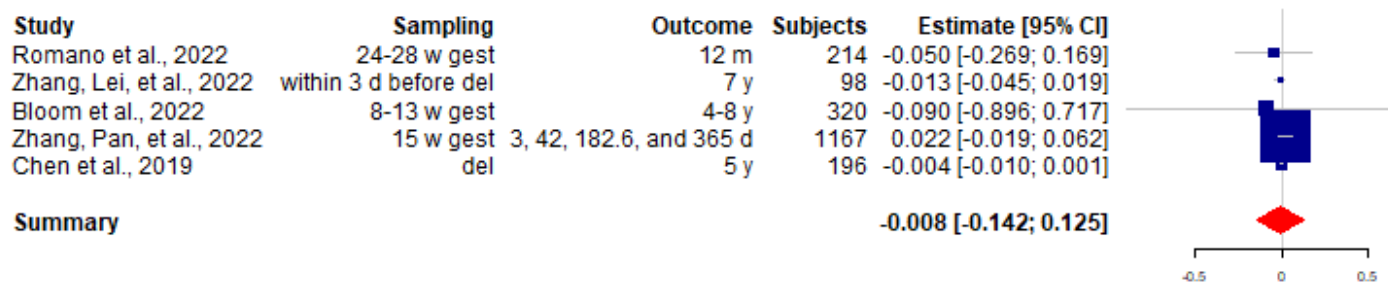

Prenatal and childhood exposure to per-/polyfluoroalkyl substances (PFASs) and its associations with childhood overweight and/or obesity: a systematic review with meta-analyses

Gianfranco Frigerio, Chiara Matilde Ferrari, and Silvia Fustinoni

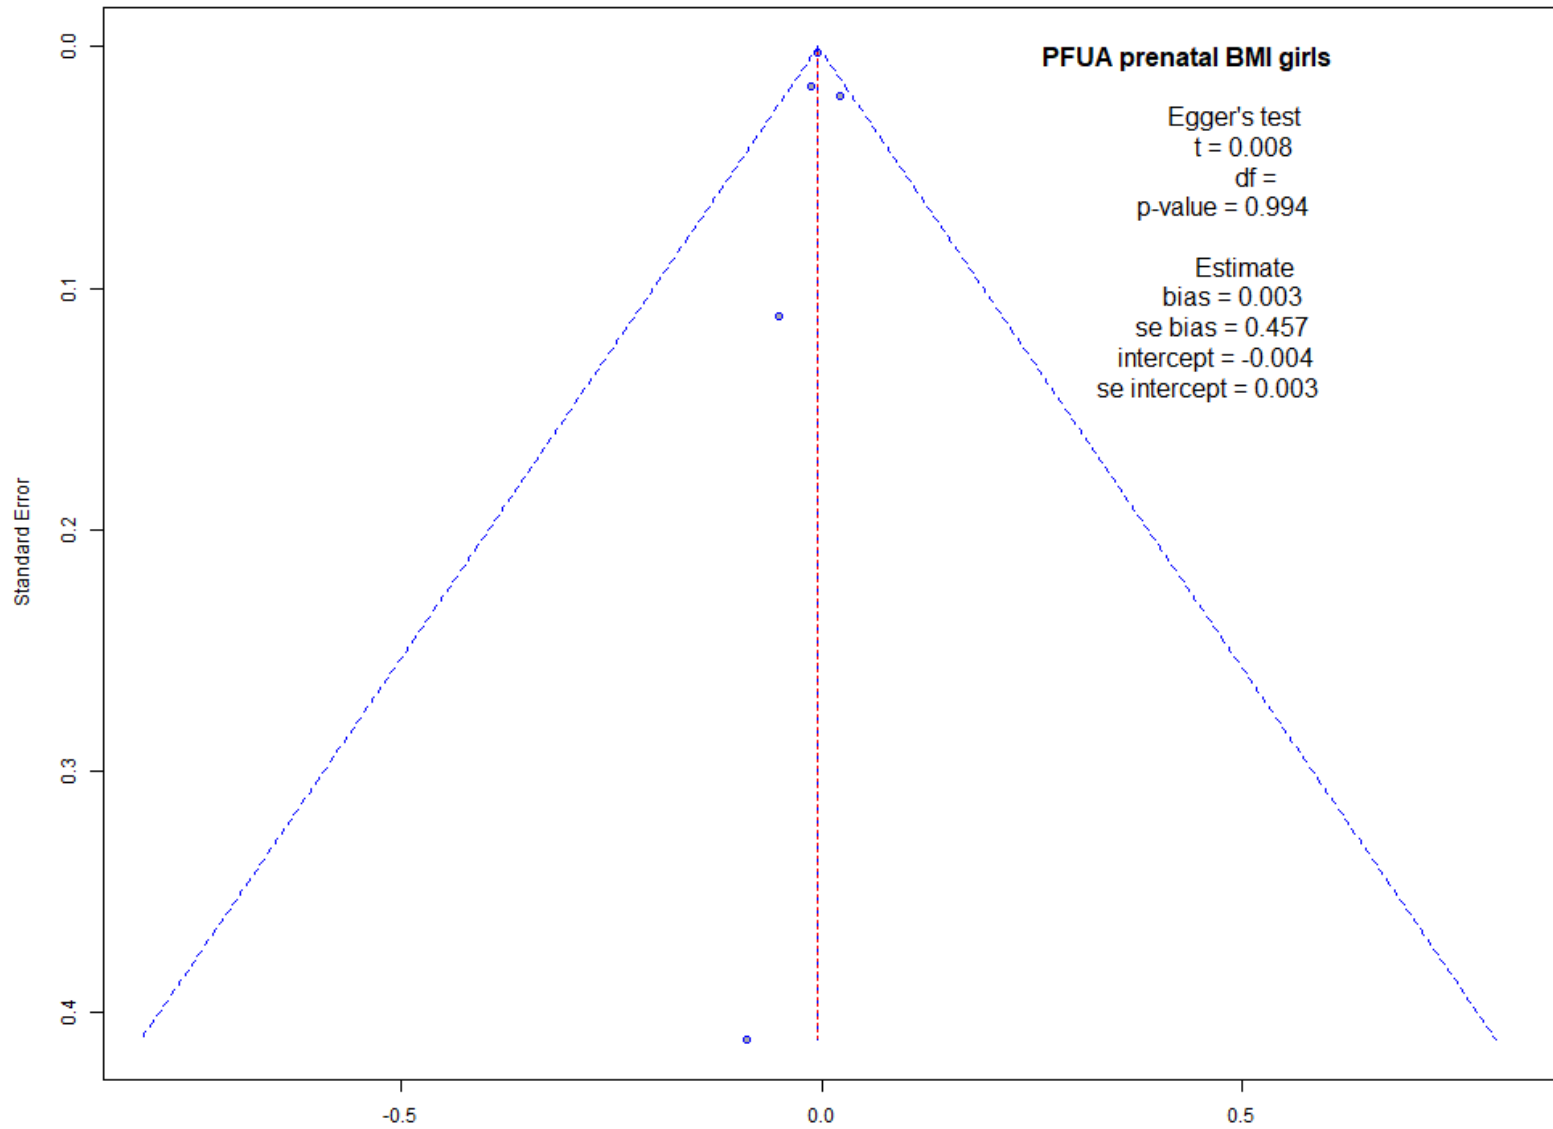

**Prenatal and childhood exposure to per-/polyfluoroalkyl substances (PFASs) and its associations with childhood overweight and/or obesity: a systematic review with meta-analyses**

Gianfranco Frigerio, Chiara Matilde Ferrari, and Silvia Fustinoni

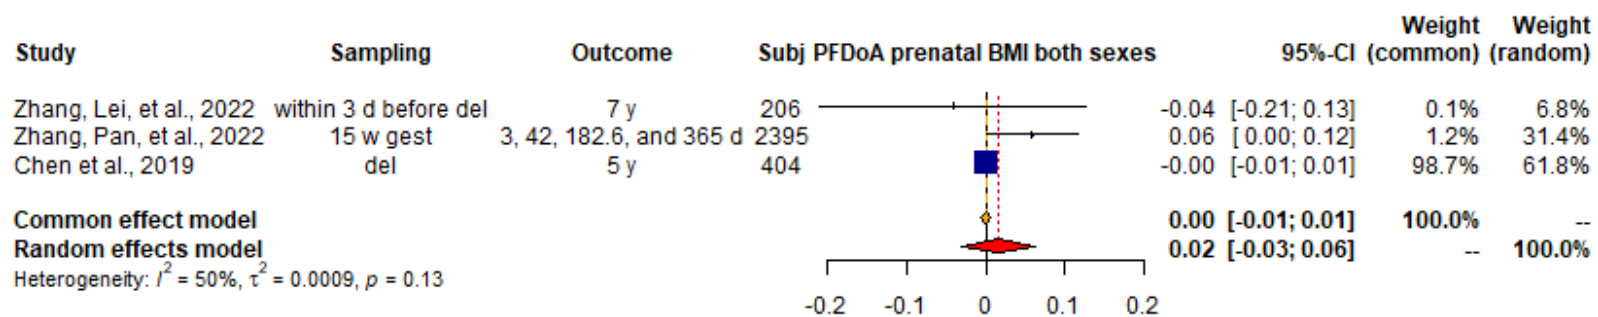



**Prenatal and childhood exposure to per-/polyfluoroalkyl substances (PFASs) and its associations with childhood overweight and/or obesity: a systematic review with meta-analyses**

Gianfranco Frigerio, Chiara Matilde Ferrari, and Silvia Fustinoni

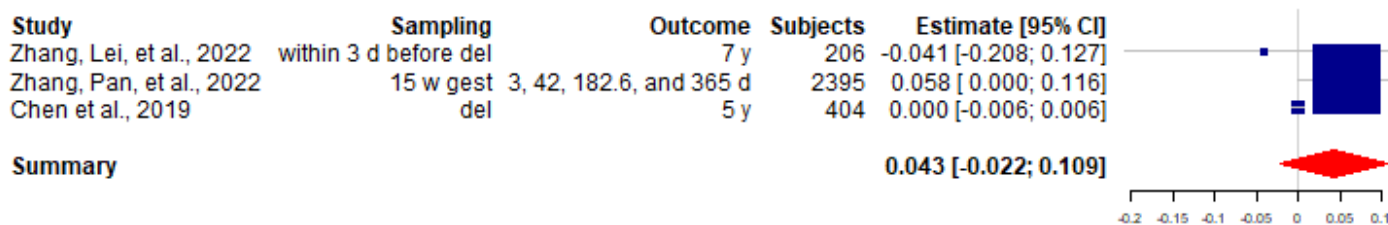

Prenatal and childhood exposure to per-/polyfluoroalkyl substances (PFASs) and its associations with childhood overweight and/or obesity: a systematic review with meta-analyses

Gianfranco Frigerio, Chiara Matilde Ferrari, and Silvia Fustinoni

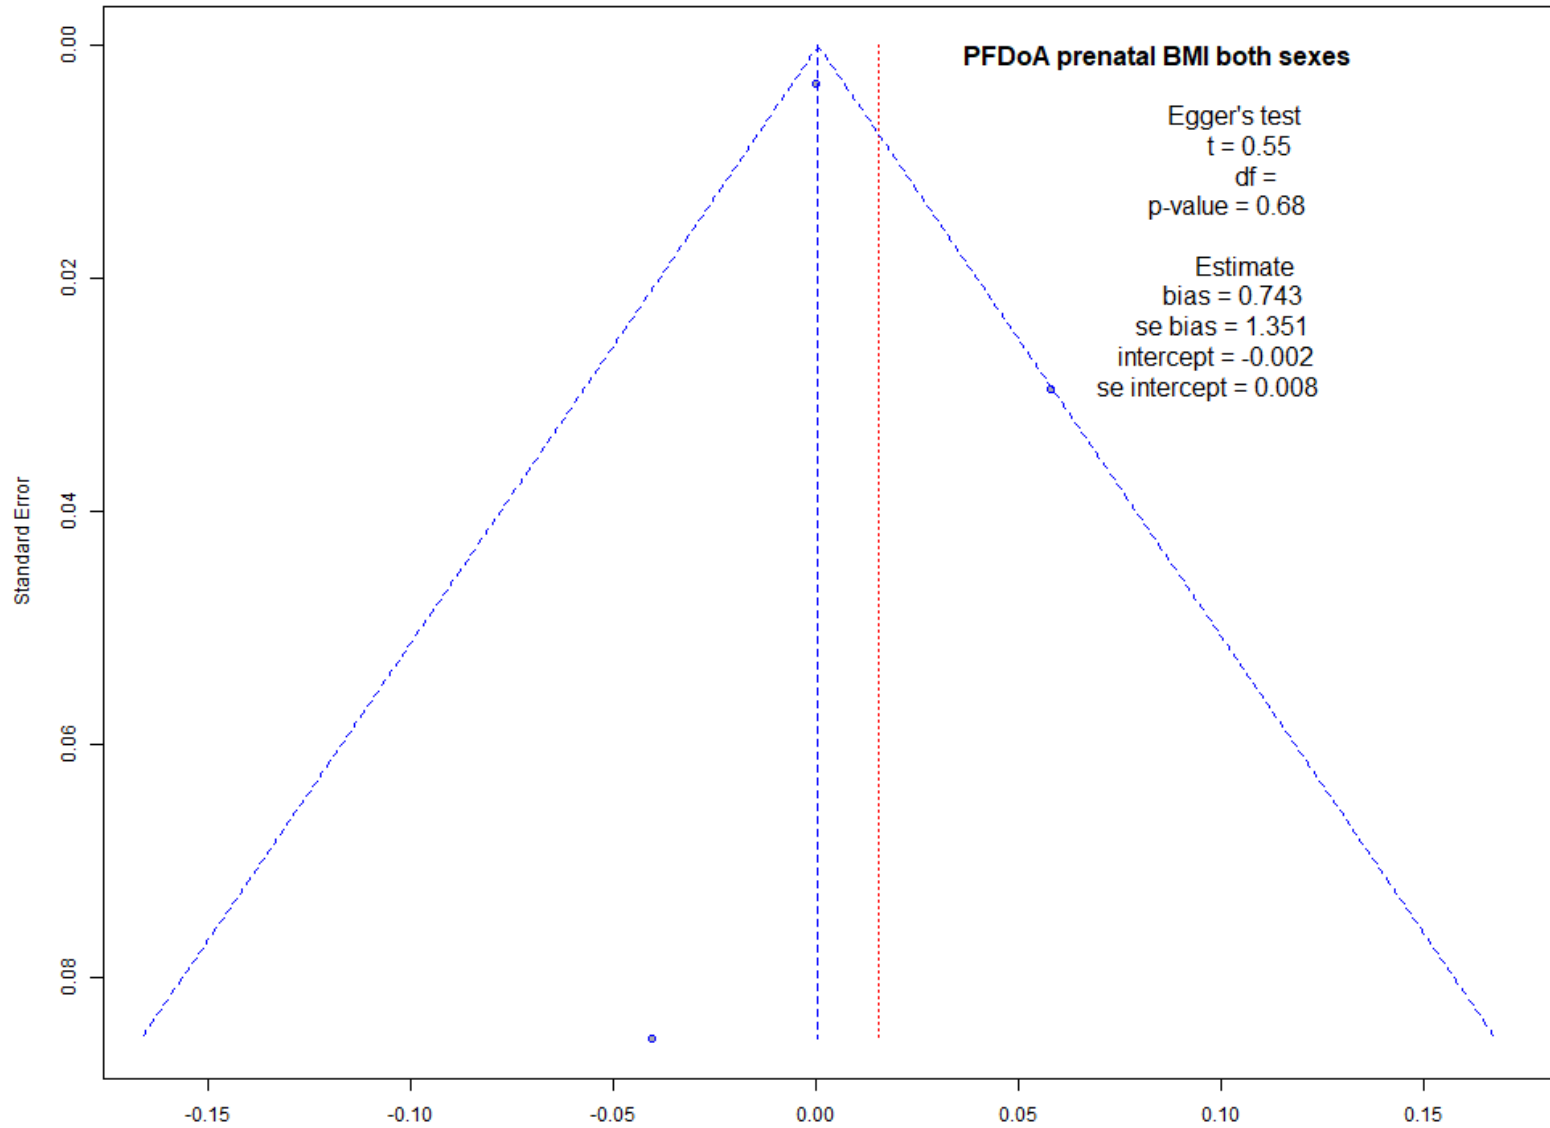

**Prenatal and childhood exposure to per-/polyfluoroalkyl substances (PFASs) and its associations with childhood overweight and/or obesity: a systematic review with meta-analyses**

Gianfranco Frigerio, Chiara Matilde Ferrari, and Silvia Fustinoni

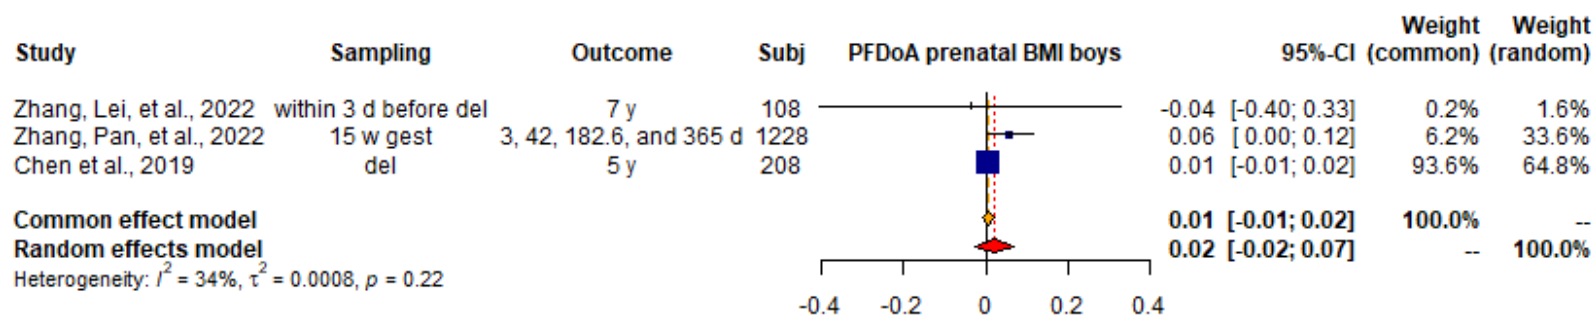

**Prenatal and childhood exposure to per-/polyfluoroalkyl substances (PFASs) and its associations with childhood overweight and/or obesity: a systematic review with meta-analyses**

Gianfranco Frigerio, Chiara Matilde Ferrari, and Silvia Fustinoni

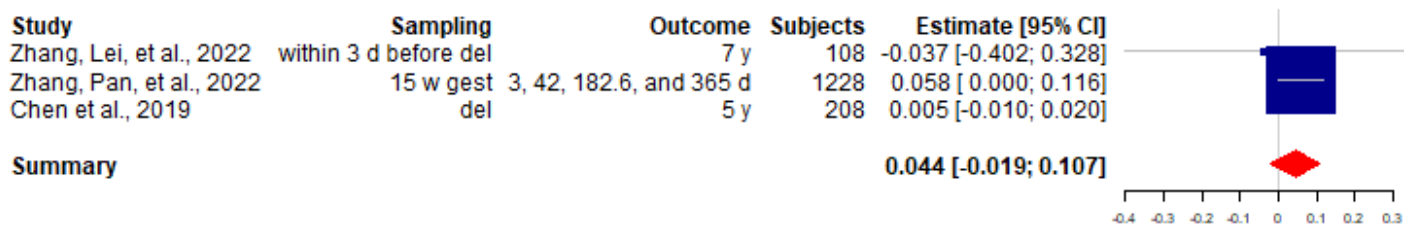

Prenatal and childhood exposure to per-/polyfluoroalkyl substances (PFASs) and its associations with childhood overweight and/or obesity: a systematic review with meta-analyses

Gianfranco Frigerio, Chiara Matilde Ferrari, and Silvia Fustinoni

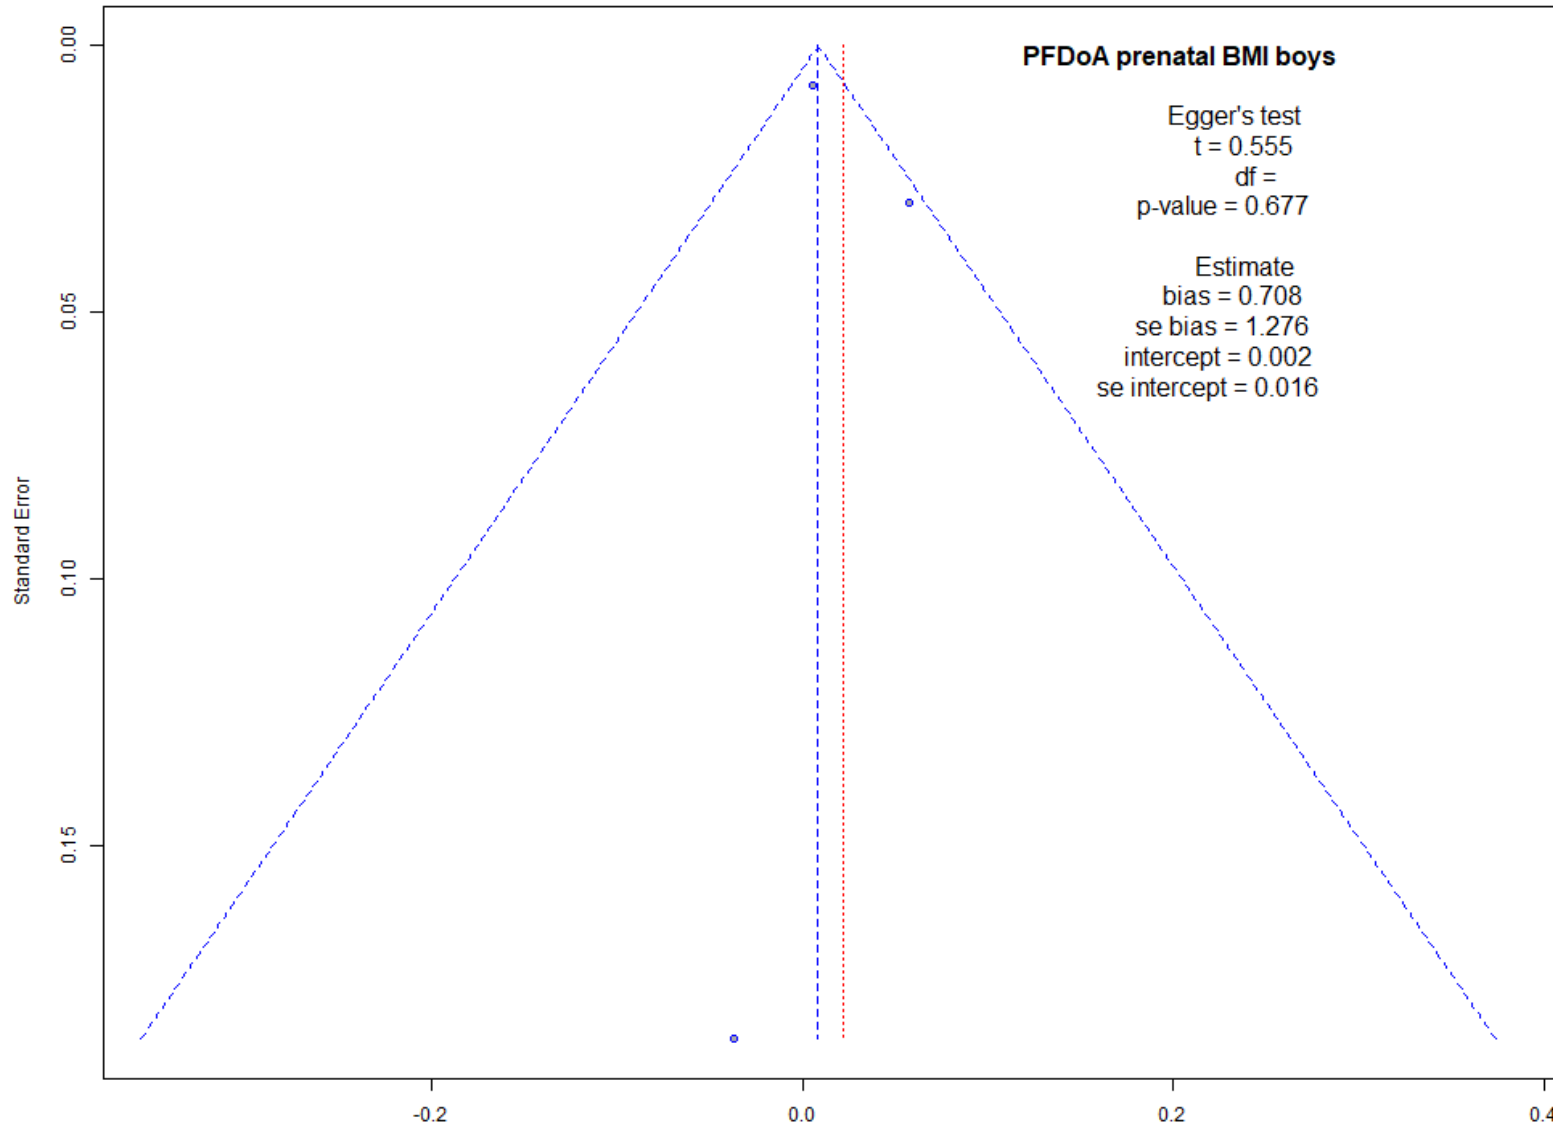

**Prenatal and childhood exposure to per-/polyfluoroalkyl substances (PFASs) and its associations with childhood overweight and/or obesity: a systematic review with meta-analyses**

Gianfranco Frigerio, Chiara Matilde Ferrari, and Silvia Fustinoni

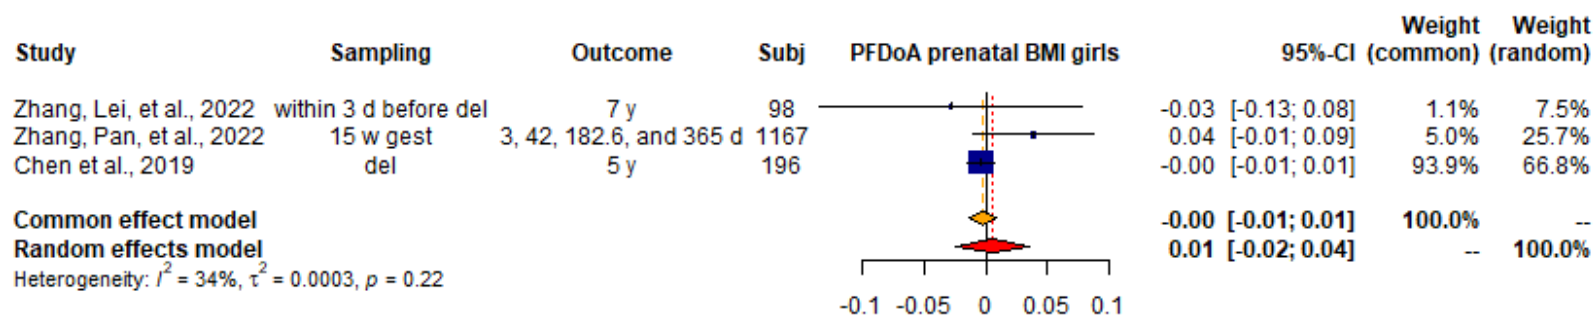

**Prenatal and childhood exposure to per-/polyfluoroalkyl substances (PFASs) and its associations with childhood overweight and/or obesity: a systematic review with meta-analyses**

Gianfranco Frigerio, Chiara Matilde Ferrari, and Silvia Fustinoni

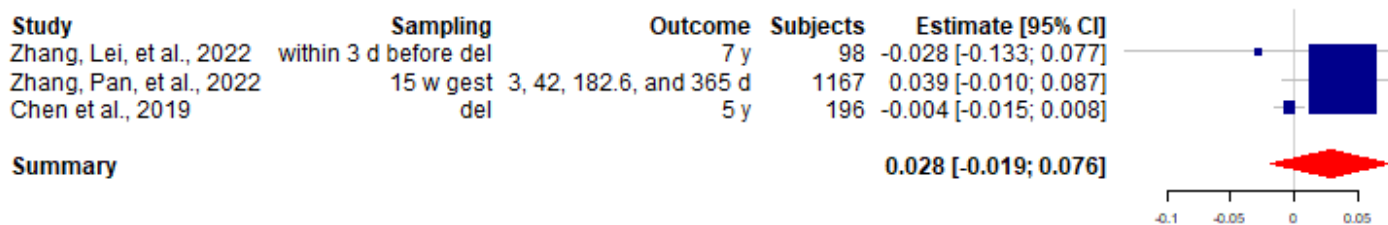

Prenatal and childhood exposure to per-/polyfluoroalkyl substances (PFASs) and its associations with childhood overweight and/or obesity: a systematic review with meta-analyses

Gianfranco Frigerio, Chiara Matilde Ferrari, and Silvia Fustinoni

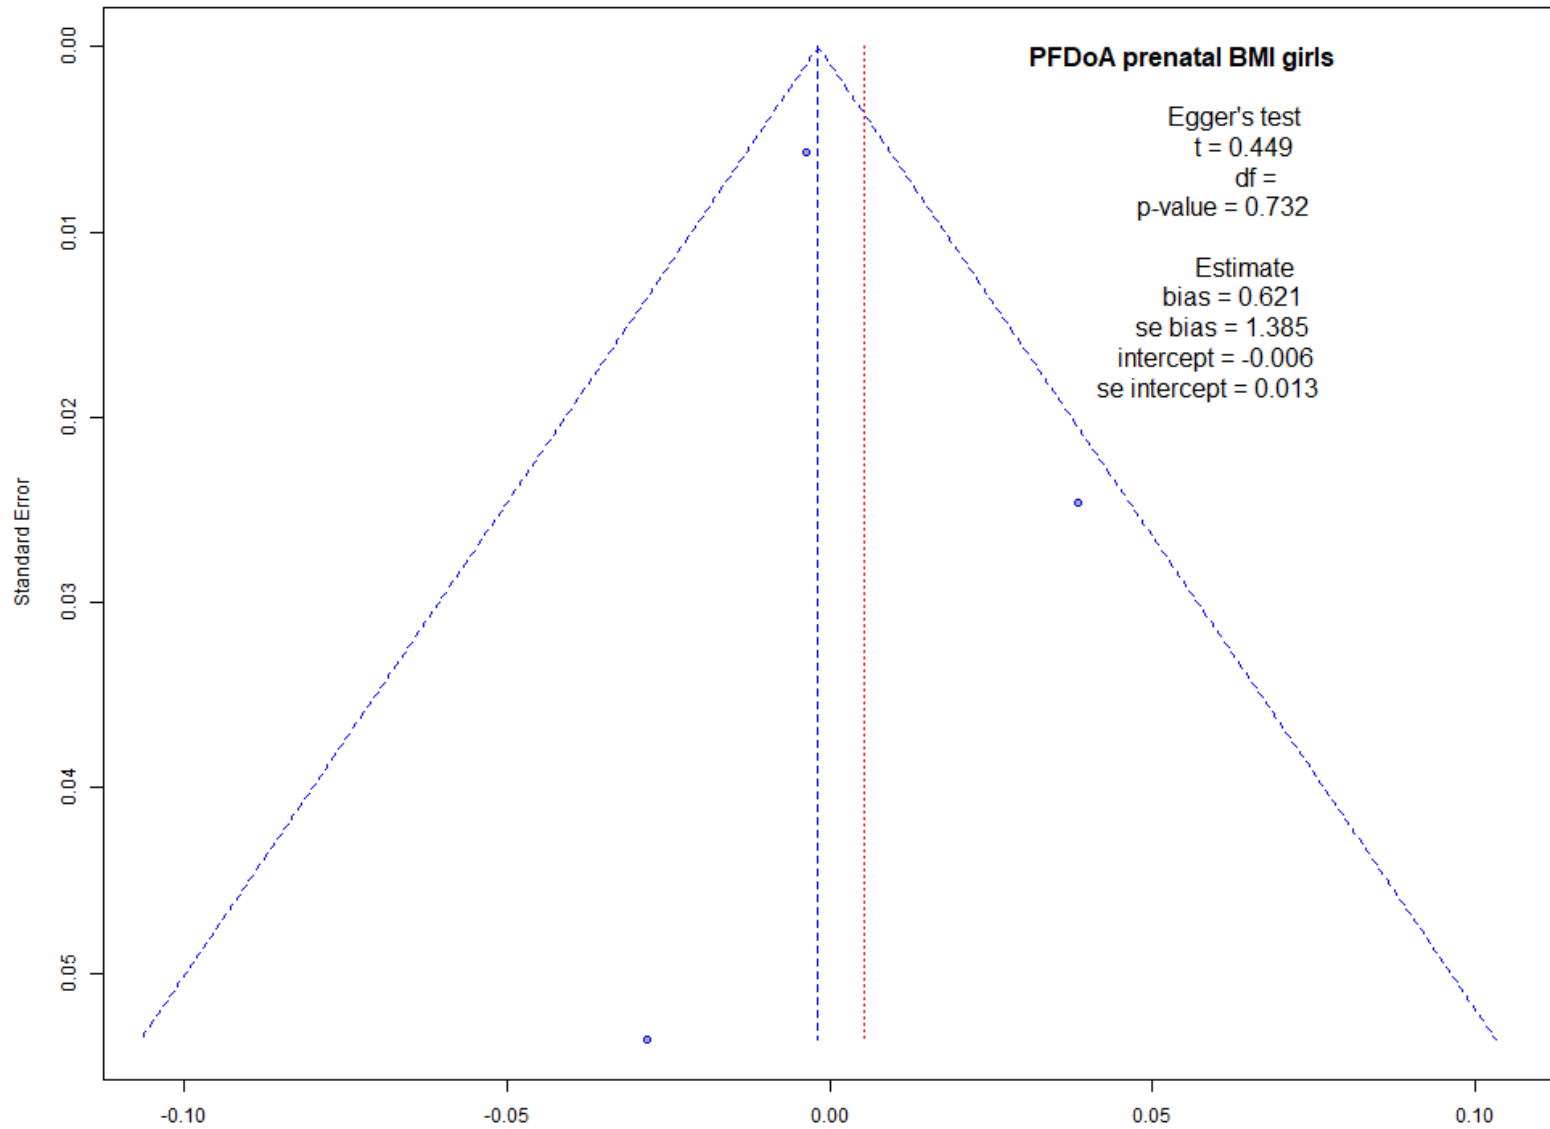



**Prenatal and childhood exposure to per-/polyfluoroalkyl substances (PFASs) and its associations with childhood overweight and/or obesity: a systematic review with meta-analyses**

Gianfranco Frigerio, Chiara Matilde Ferrari, and Silvia Fustinoni

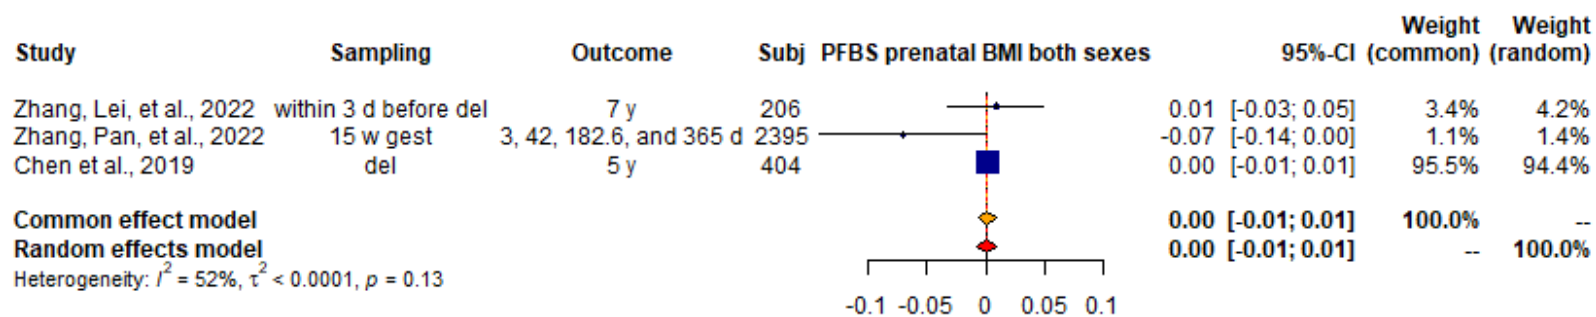

# Prenatal and childhood exposure to per-/polyfluoroalkyl substances (PFASs) and its associations with childhood overweight and/or obesity: a systematic review with meta-analyses

Gianfranco Frigerio, Chiara Matilde Ferrari, and Silvia Fustinoni

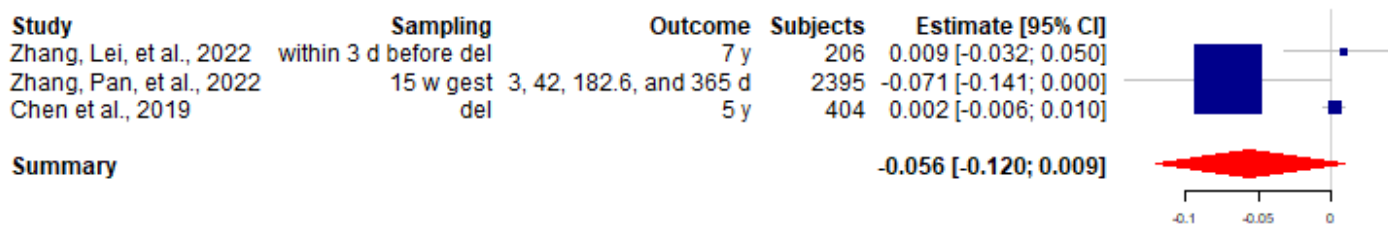

Prenatal and childhood exposure to per-/polyfluoroalkyl substances (PFASs) and its associations with childhood overweight and/or obesity: a systematic review with meta-analyses

Gianfranco Frigerio, Chiara Matilde Ferrari, and Silvia Fustinoni

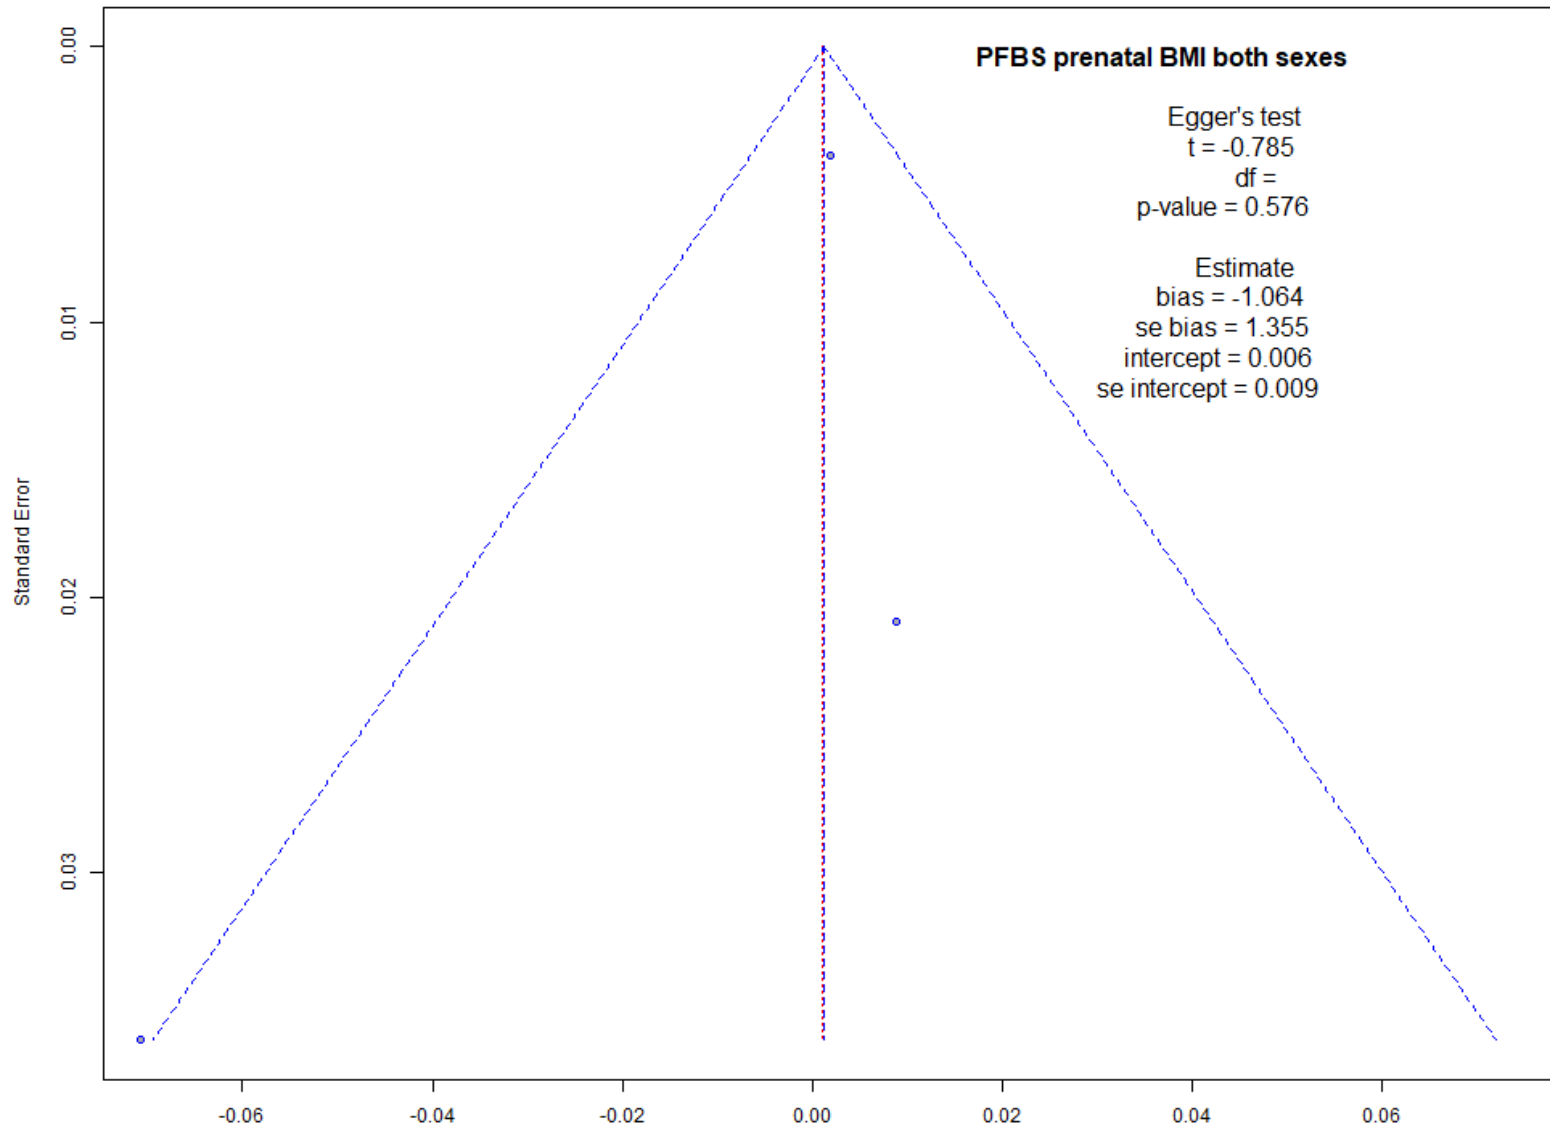

**Prenatal and childhood exposure to per-/polyfluoroalkyl substances (PFASs) and its associations with childhood overweight and/or obesity: a systematic review with meta-analyses**

Gianfranco Frigerio, Chiara Matilde Ferrari, and Silvia Fustinoni

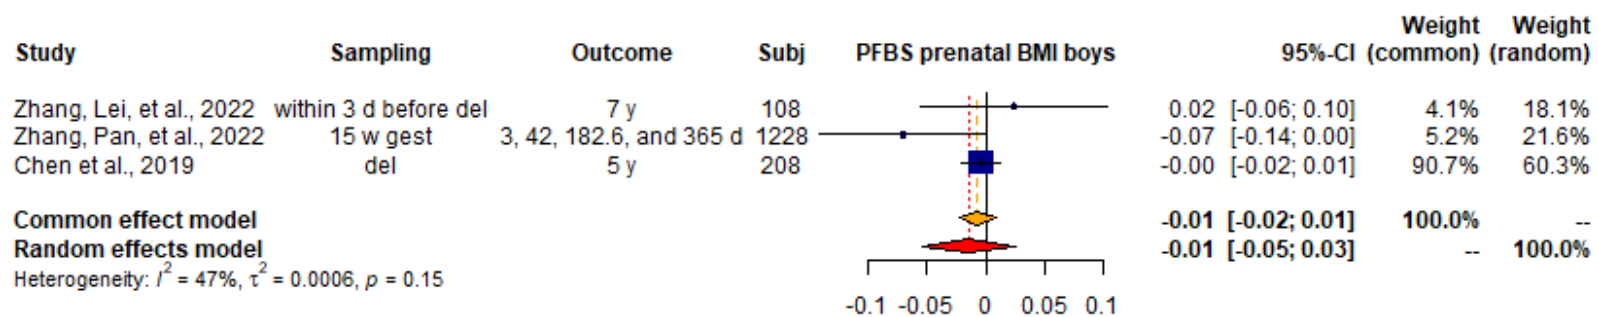

# Prenatal and childhood exposure to per-/polyfluoroalkyl substances (PFASs) and its associations with childhood overweight and/or obesity: a systematic review with meta-analyses

Gianfranco Frigerio, Chiara Matilde Ferrari, and Silvia Fustinoni

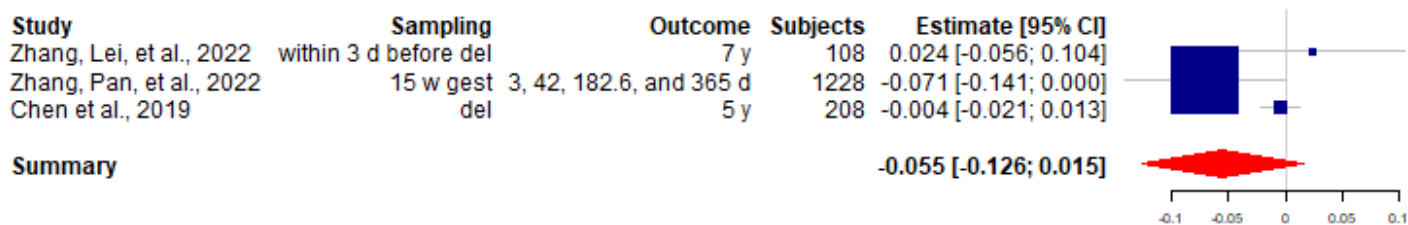

Prenatal and childhood exposure to per-/polyfluoroalkyl substances (PFASs) and its associations with childhood overweight and/or obesity: a systematic review with meta-analyses

Gianfranco Frigerio, Chiara Matilde Ferrari, and Silvia Fustinoni

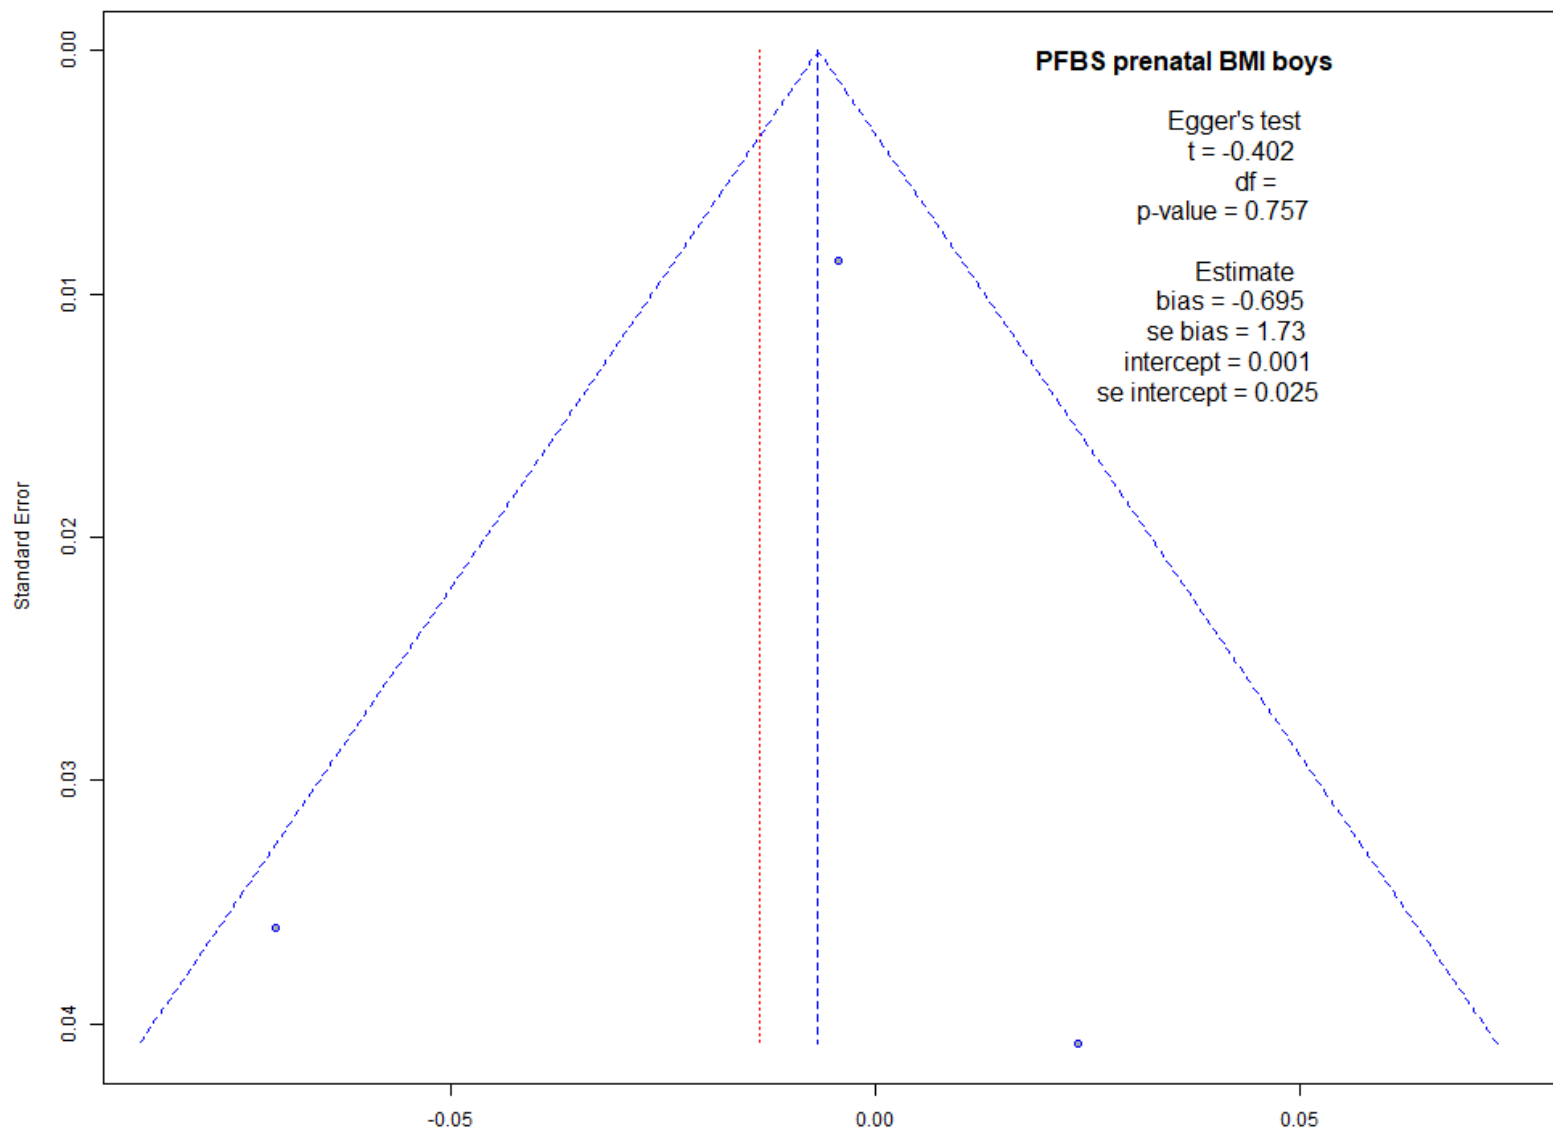

**Prenatal and childhood exposure to per-/polyfluoroalkyl substances (PFASs) and its associations with childhood overweight and/or obesity: a systematic review with meta-analyses**

Gianfranco Frigerio, Chiara Matilde Ferrari, and Silvia Fustinoni

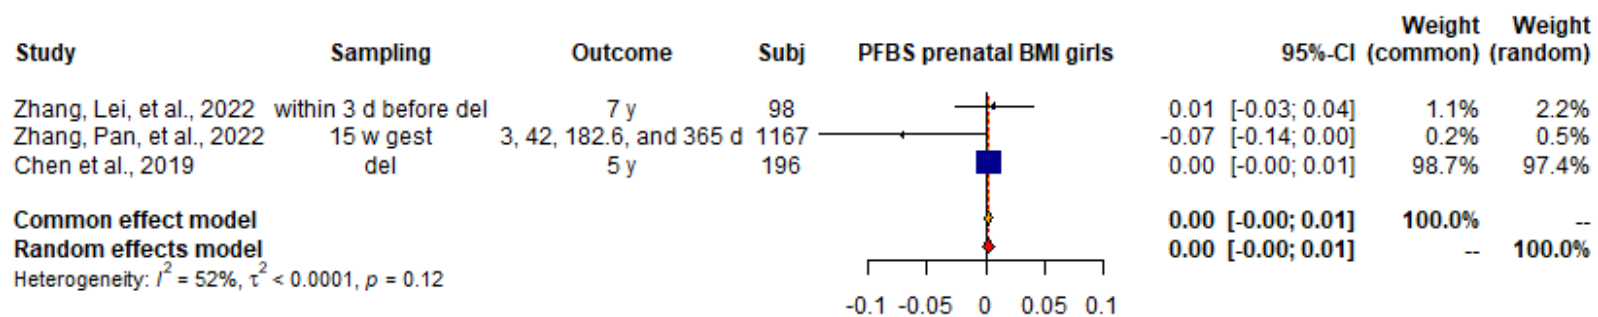

**Prenatal and childhood exposure to per-/polyfluoroalkyl substances (PFASs) and its associations with childhood overweight and/or obesity: a systematic review with meta-analyses**

Gianfranco Frigerio, Chiara Matilde Ferrari, and Silvia Fustinoni

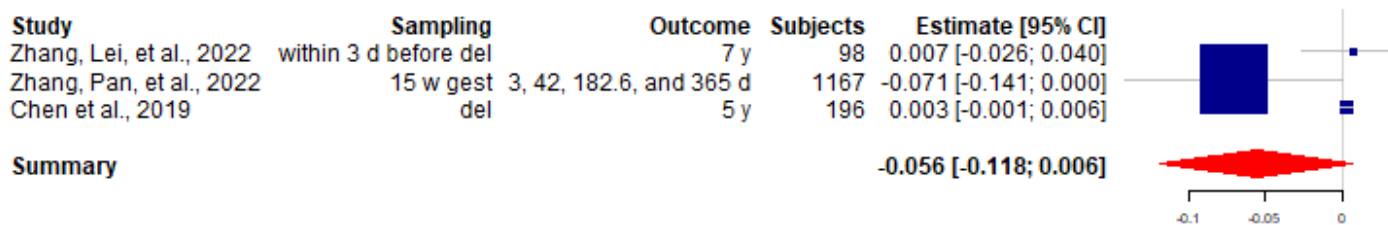



Prenatal and childhood exposure to per-/polyfluoroalkyl substances (PFASs) and its associations with childhood overweight and/or obesity: a systematic review with meta-analyses

Gianfranco Frigerio, Chiara Matilde Ferrari, and Silvia Fustinoni

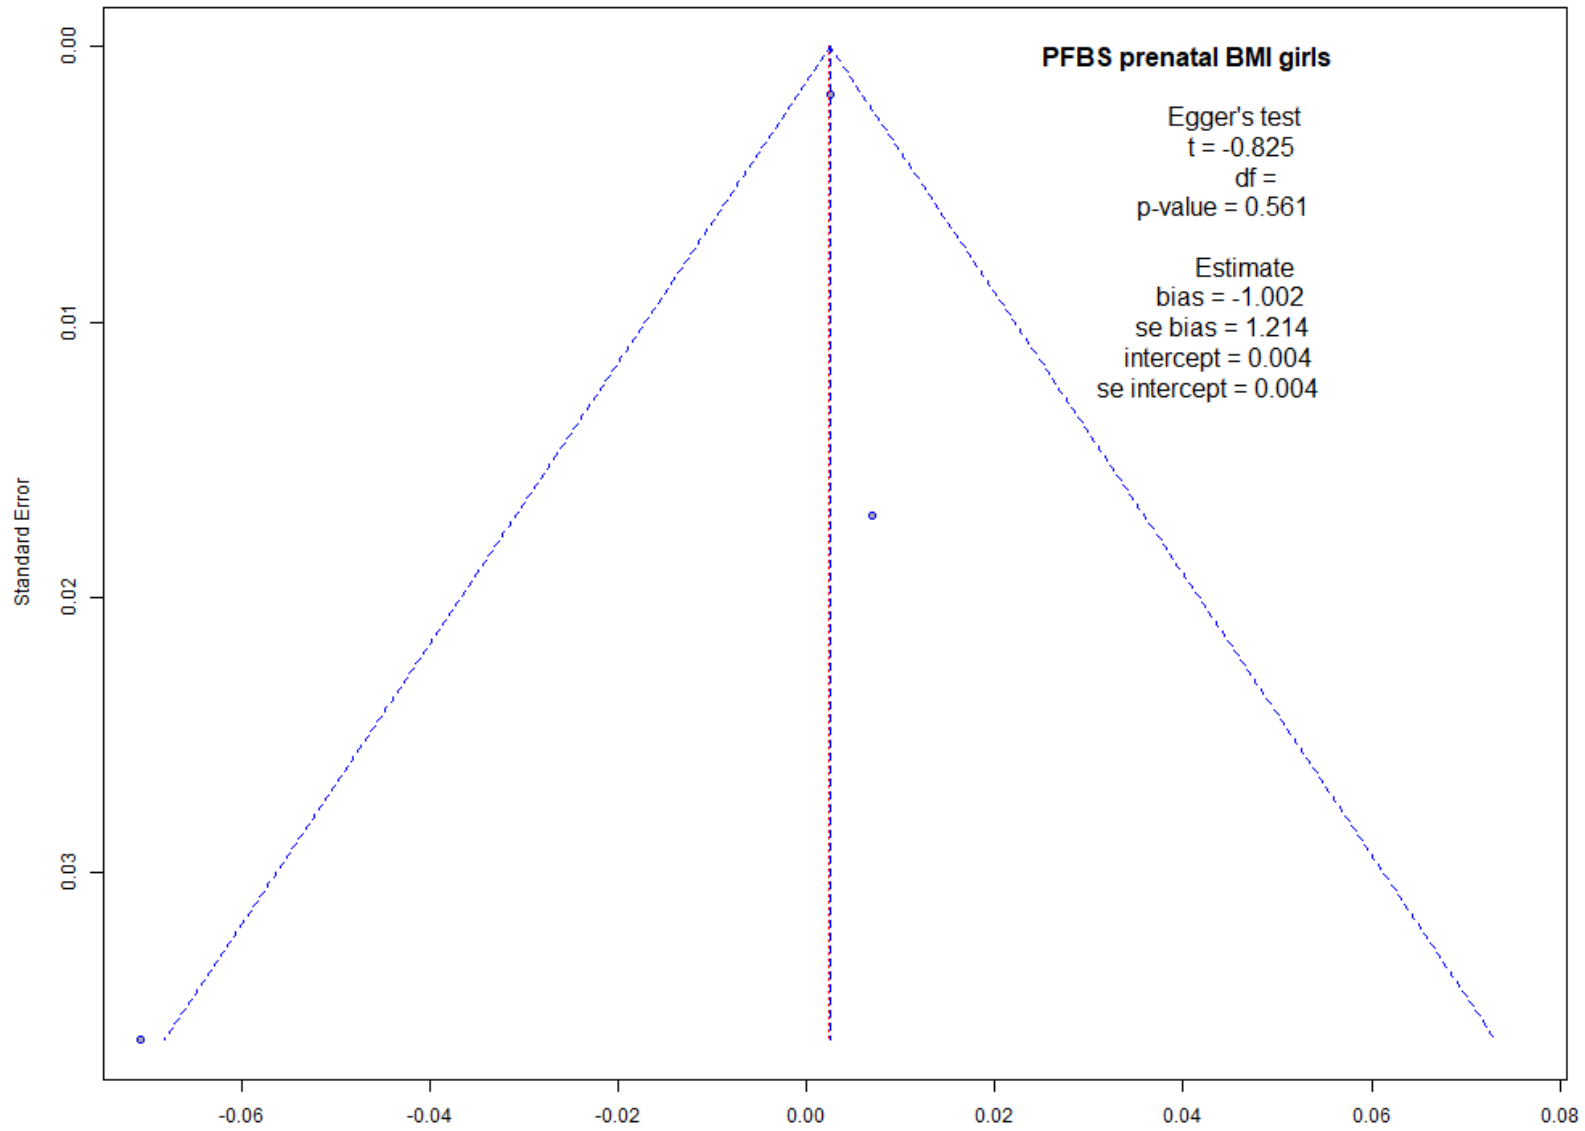

**Prenatal and childhood exposure to per-/polyfluoroalkyl substances (PFASs) and its associations with childhood overweight and/or obesity: a systematic review with meta-analyses**

Gianfranco Frigerio, Chiara Matilde Ferrari, and Silvia Fustinoni

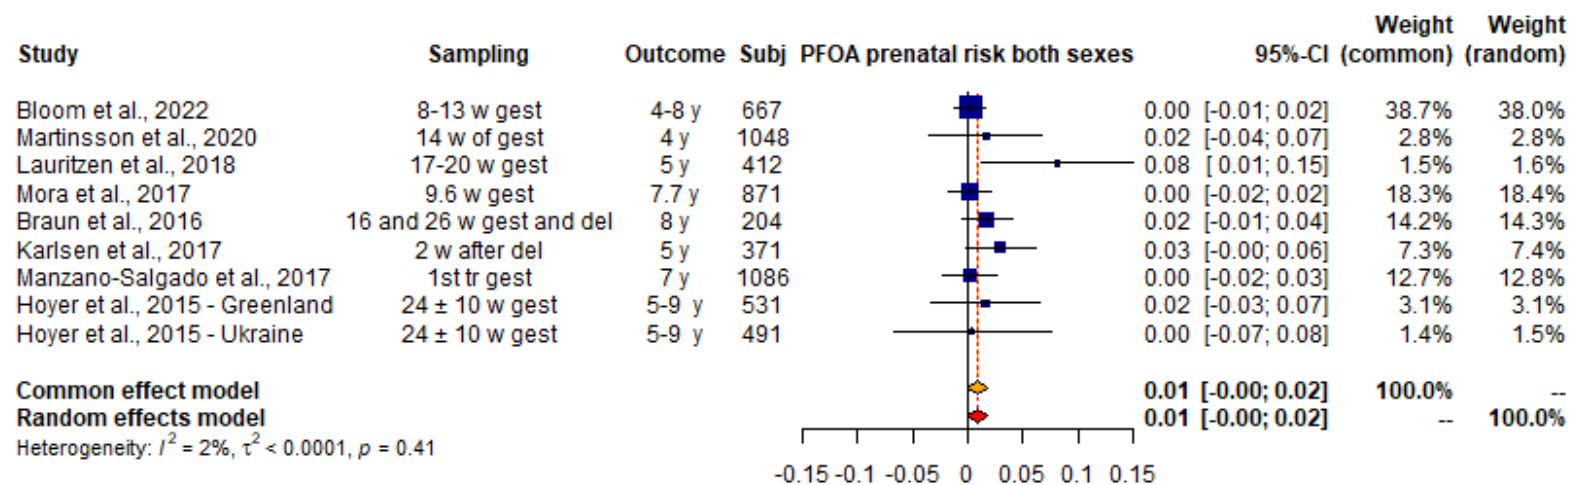

# Prenatal and childhood exposure to per-/polyfluoroalkyl substances (PFASs) and its associations with childhood overweight and/or obesity: a systematic review with meta-analyses

Gianfranco Frigerio, Chiara Matilde Ferrari, and Silvia Fustinoni

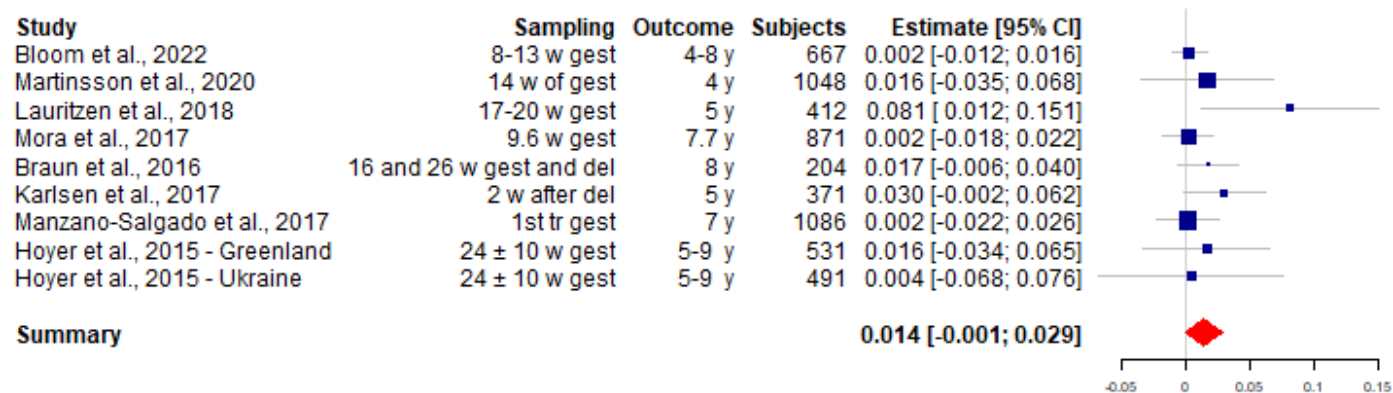

Prenatal and childhood exposure to per-/polyfluoroalkyl substances (PFASs) and its associations with childhood overweight and/or obesity: a systematic review with meta-analyses

Gianfranco Frigerio, Chiara Matilde Ferrari, and Silvia Fustinoni

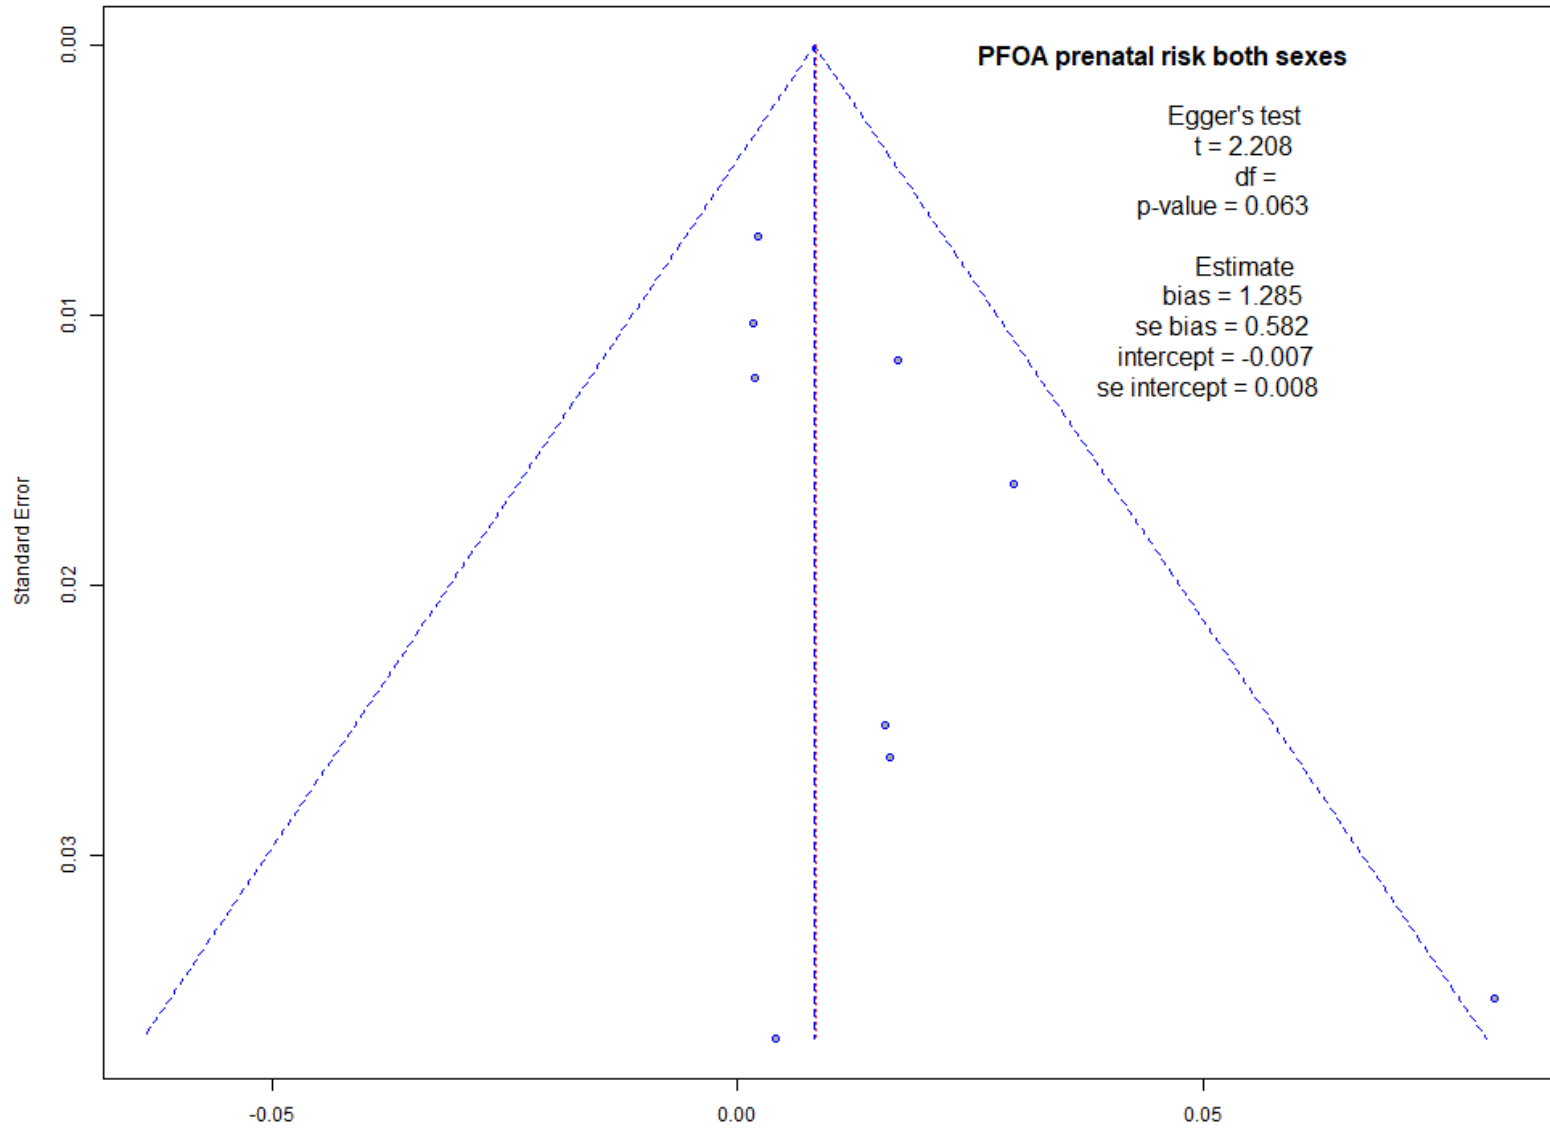

**Prenatal and childhood exposure to per-/polyfluoroalkyl substances (PFASs) and its associations with childhood overweight and/or obesity: a systematic review with meta-analyses**

Gianfranco Frigerio, Chiara Matilde Ferrari, and Silvia Fustinoni

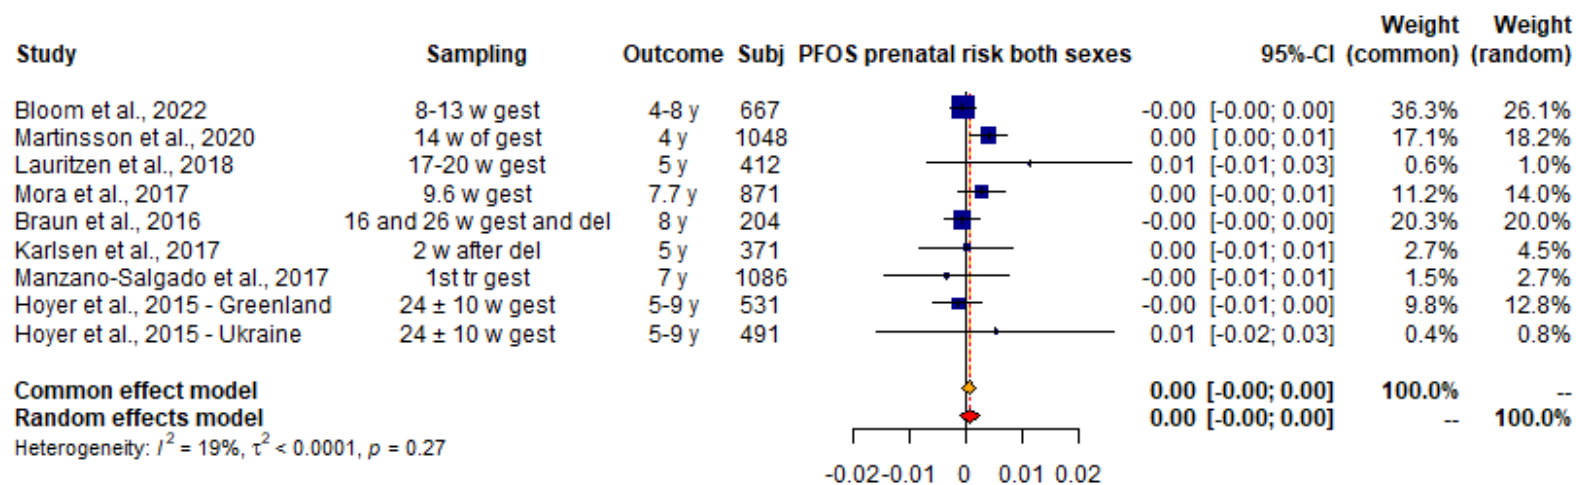

**Prenatal and childhood exposure to per-/polyfluoroalkyl substances (PFASs) and its associations with childhood overweight and/or obesity: a systematic review with meta-analyses**

Gianfranco Frigerio, Chiara Matilde Ferrari, and Silvia Fustinoni

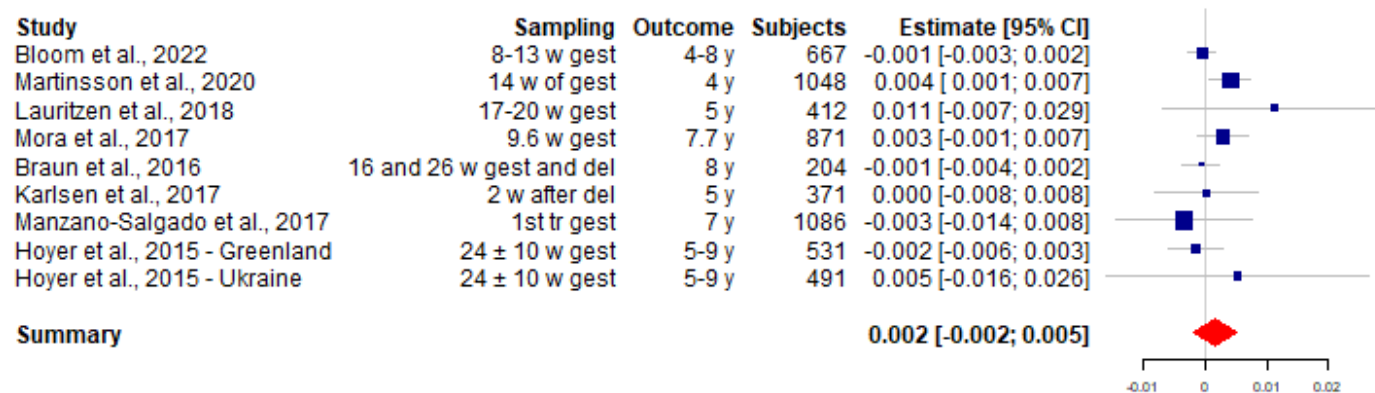

Prenatal and childhood exposure to per-/polyfluoroalkyl substances (PFASs) and its associations with childhood overweight and/or obesity: a systematic review with meta-analyses

Gianfranco Frigerio, Chiara Matilde Ferrari, and Silvia Fustinoni

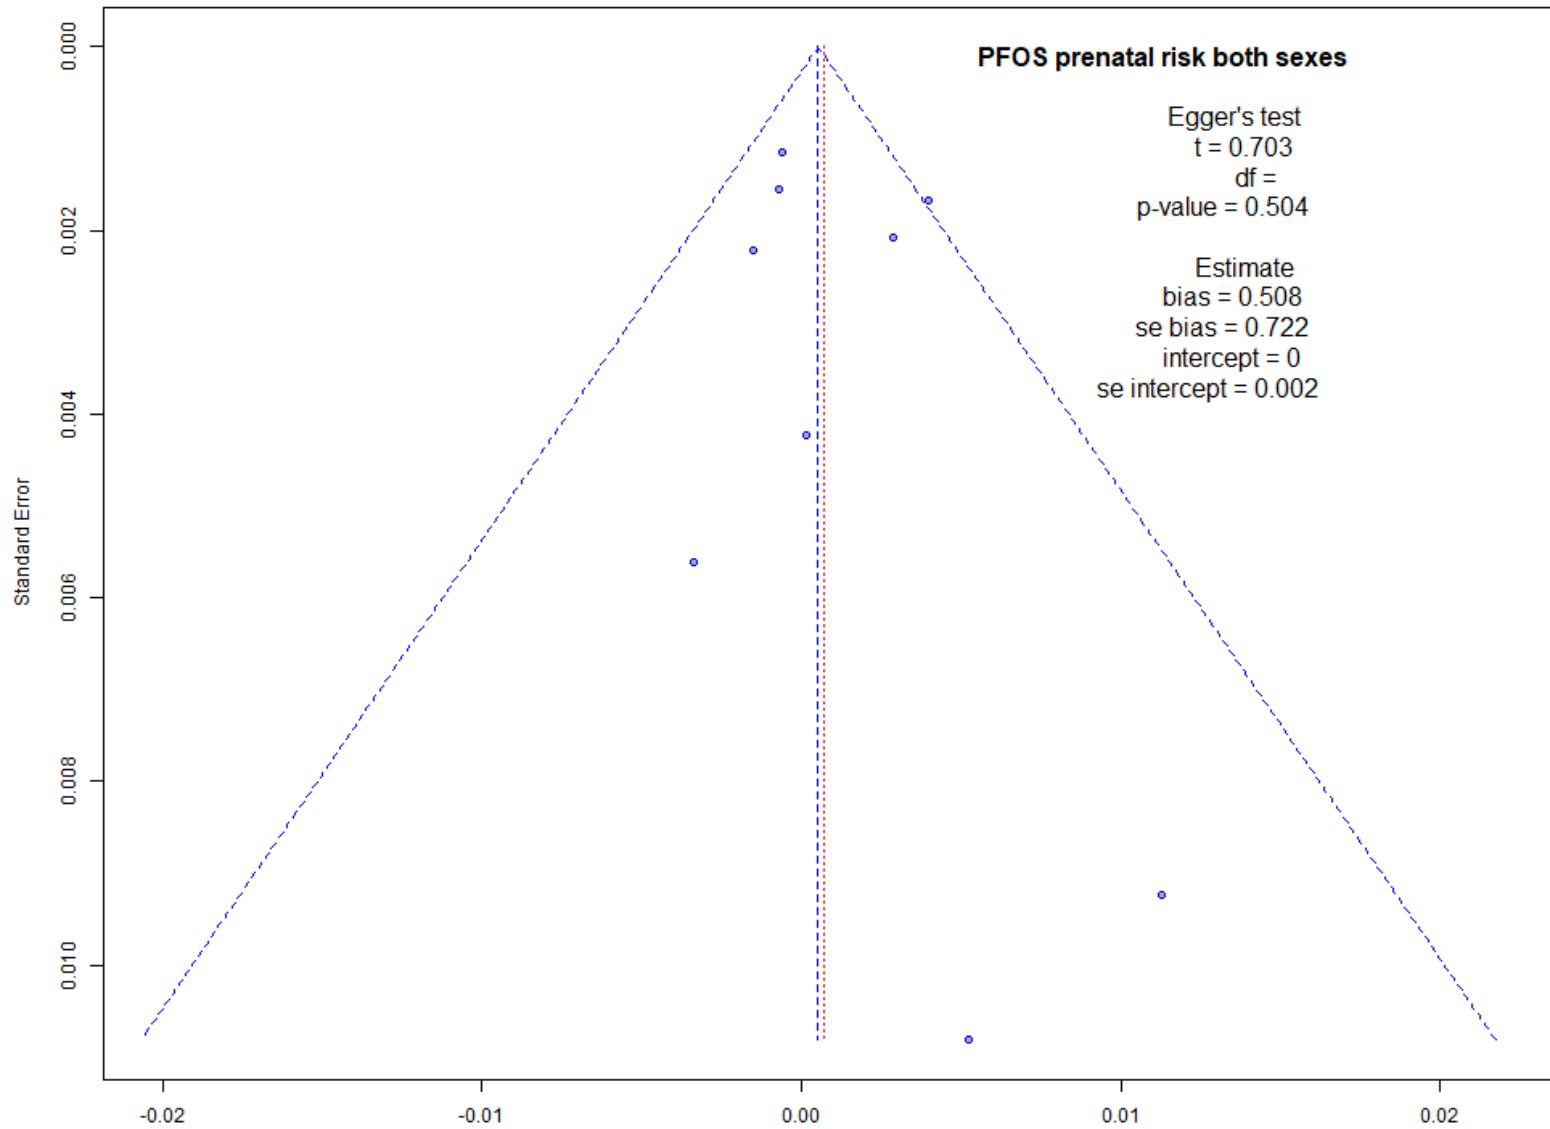

# Prenatal and childhood exposure to per-/polyfluoroalkyl substances (PFASs) and its associations with childhood overweight and/or obesity: a systematic review with meta-analyses

Gianfranco Frigerio, Chiara Matilde Ferrari, and Silvia Fustinoni

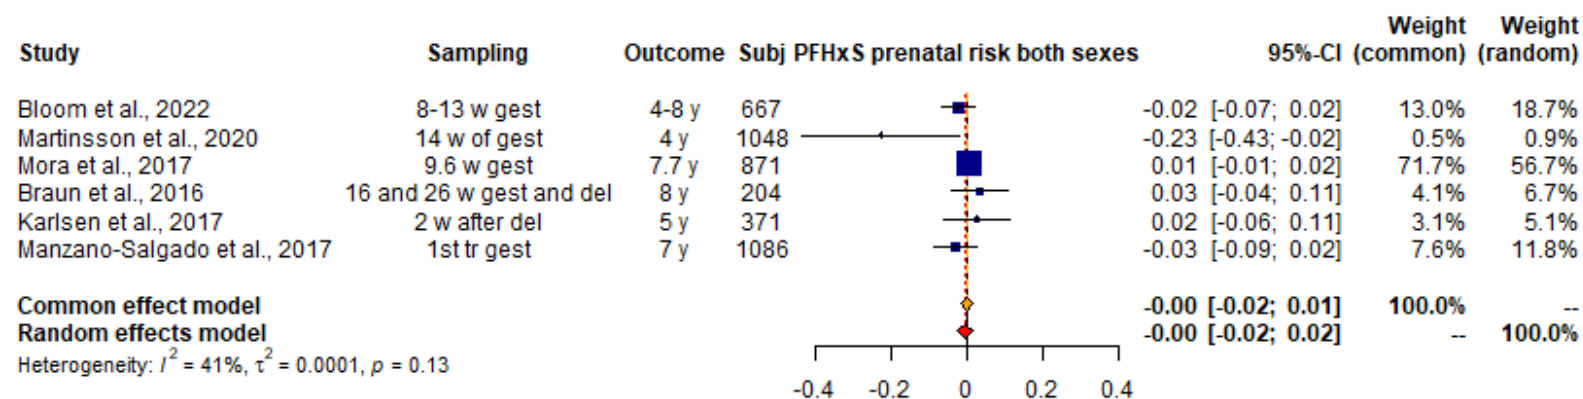



# Prenatal and childhood exposure to per-/polyfluoroalkyl substances (PFASs) and its associations with childhood overweight and/or obesity: a systematic review with meta-analyses

Gianfranco Frigerio, Chiara Matilde Ferrari, and Silvia Fustinoni

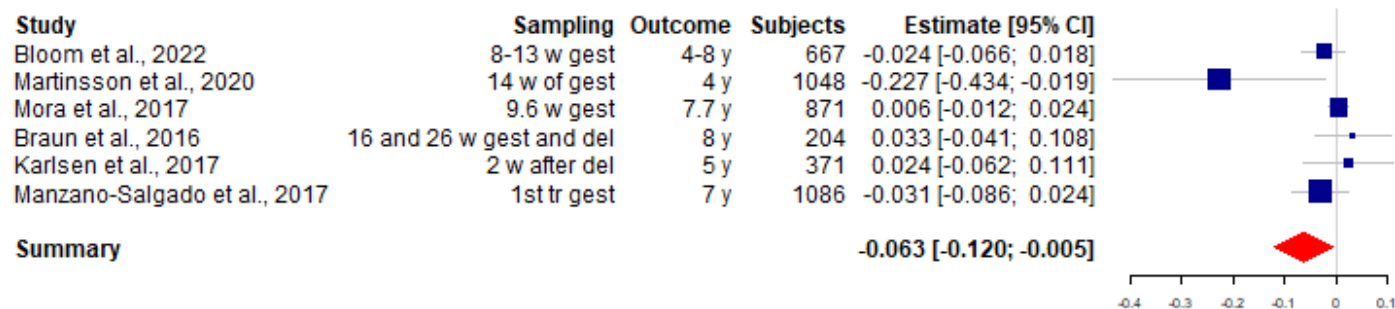

Prenatal and childhood exposure to per-/polyfluoroalkyl substances (PFASs) and its associations with childhood overweight and/or obesity: a systematic review with meta-analyses

Gianfranco Frigerio, Chiara Matilde Ferrari, and Silvia Fustinoni

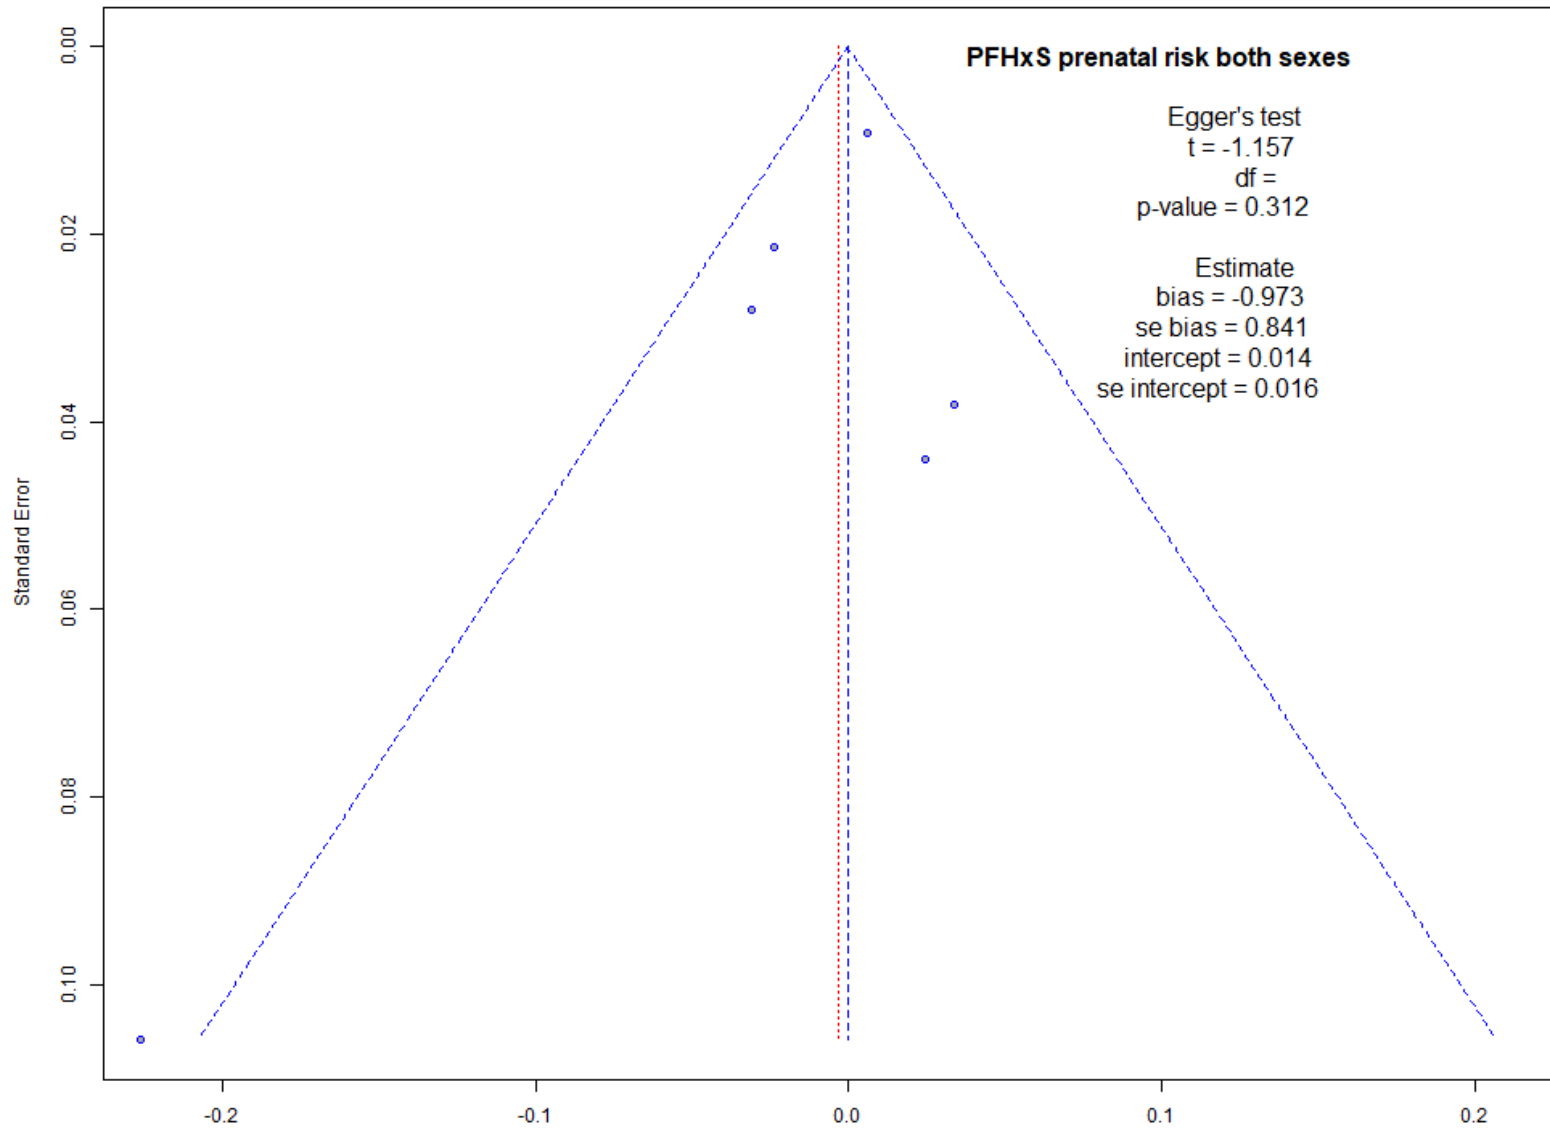

**Prenatal and childhood exposure to per-/polyfluoroalkyl substances (PFASs) and its associations with childhood overweight and/or obesity: a systematic review with meta-analyses**

Gianfranco Frigerio, Chiara Matilde Ferrari, and Silvia Fustinoni

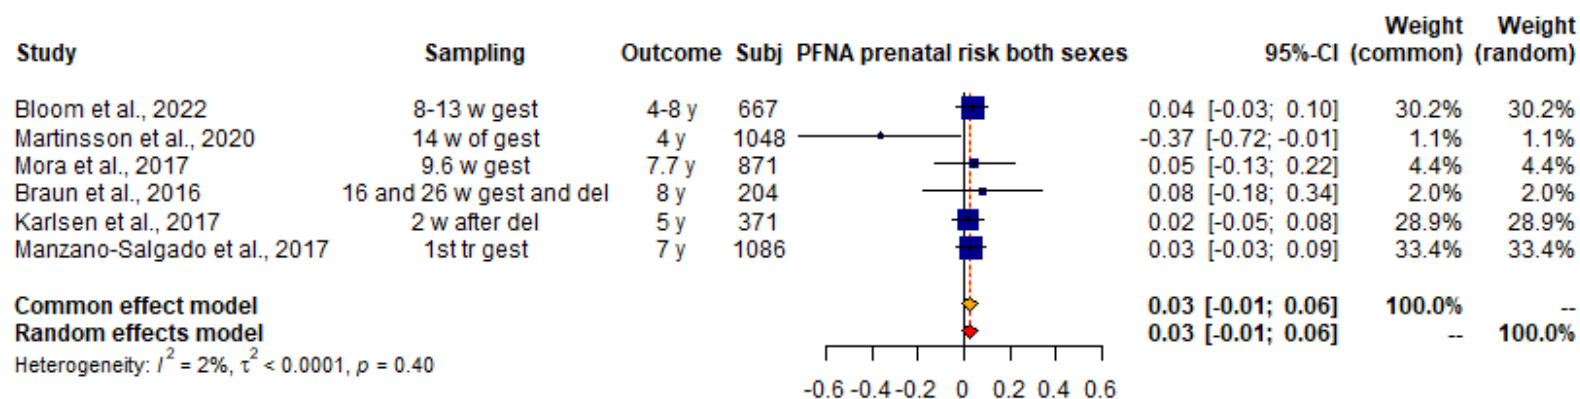

# Prenatal and childhood exposure to per-/polyfluoroalkyl substances (PFASs) and its associations with childhood overweight and/or obesity: a systematic review with meta-analyses

Gianfranco Frigerio, Chiara Matilde Ferrari, and Silvia Fustinoni

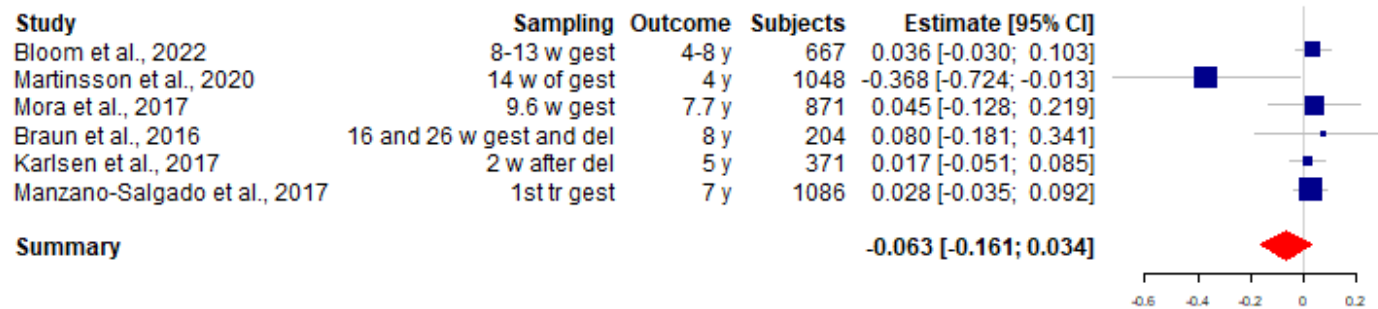

Prenatal and childhood exposure to per-/polyfluoroalkyl substances (PFASs) and its associations with childhood overweight and/or obesity: a systematic review with meta-analyses

Gianfranco Frigerio, Chiara Matilde Ferrari, and Silvia Fustinoni

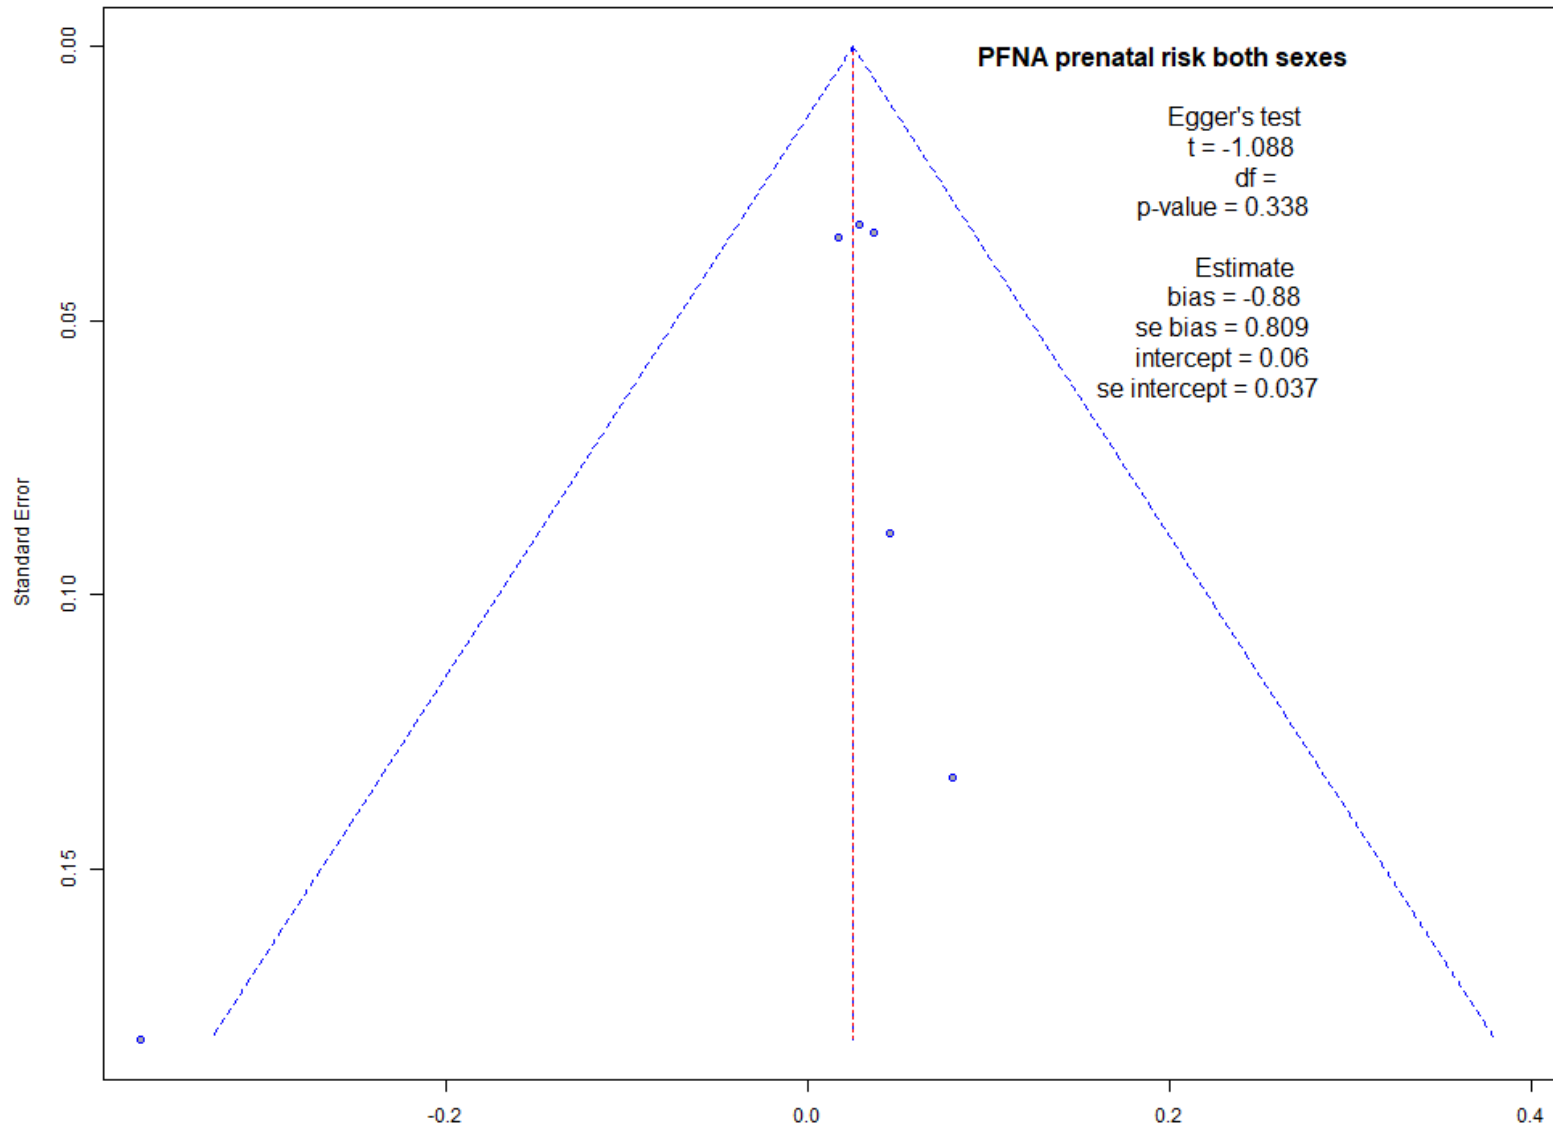

Prenatal and childhood exposure to per-/polyfluoroalkyl substances (PFASs) and its associations with childhood overweight and/or obesity: a systematic review with meta-analyses

Gianfranco Frigerio, Chiara Matilde Ferrari, and Silvia Fustinoni

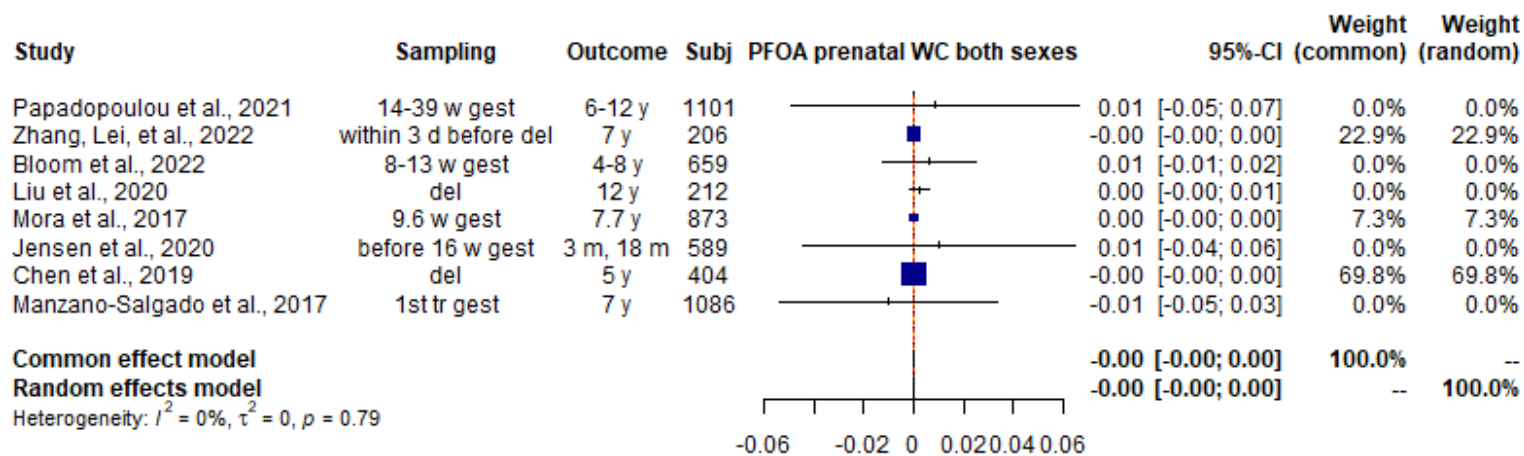

**Prenatal and childhood exposure to per-/polyfluoroalkyl substances (PFASs) and its associations with childhood overweight and/or obesity: a systematic review with meta-analyses**

Gianfranco Frigerio, Chiara Matilde Ferrari, and Silvia Fustinoni

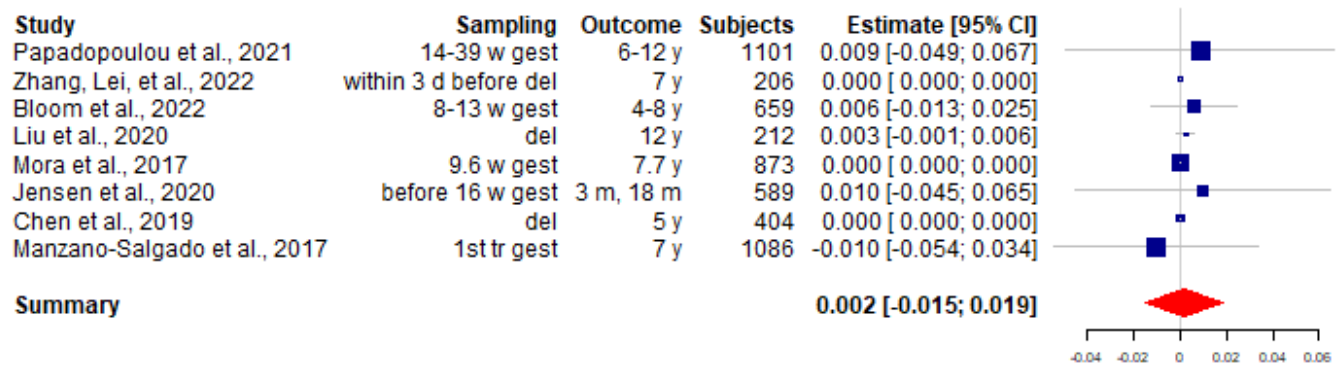

Prenatal and childhood exposure to per-/polyfluoroalkyl substances (PFASs) and its associations with childhood overweight and/or obesity: a systematic review with meta-analyses

Gianfranco Frigerio, Chiara Matilde Ferrari, and Silvia Fustinoni

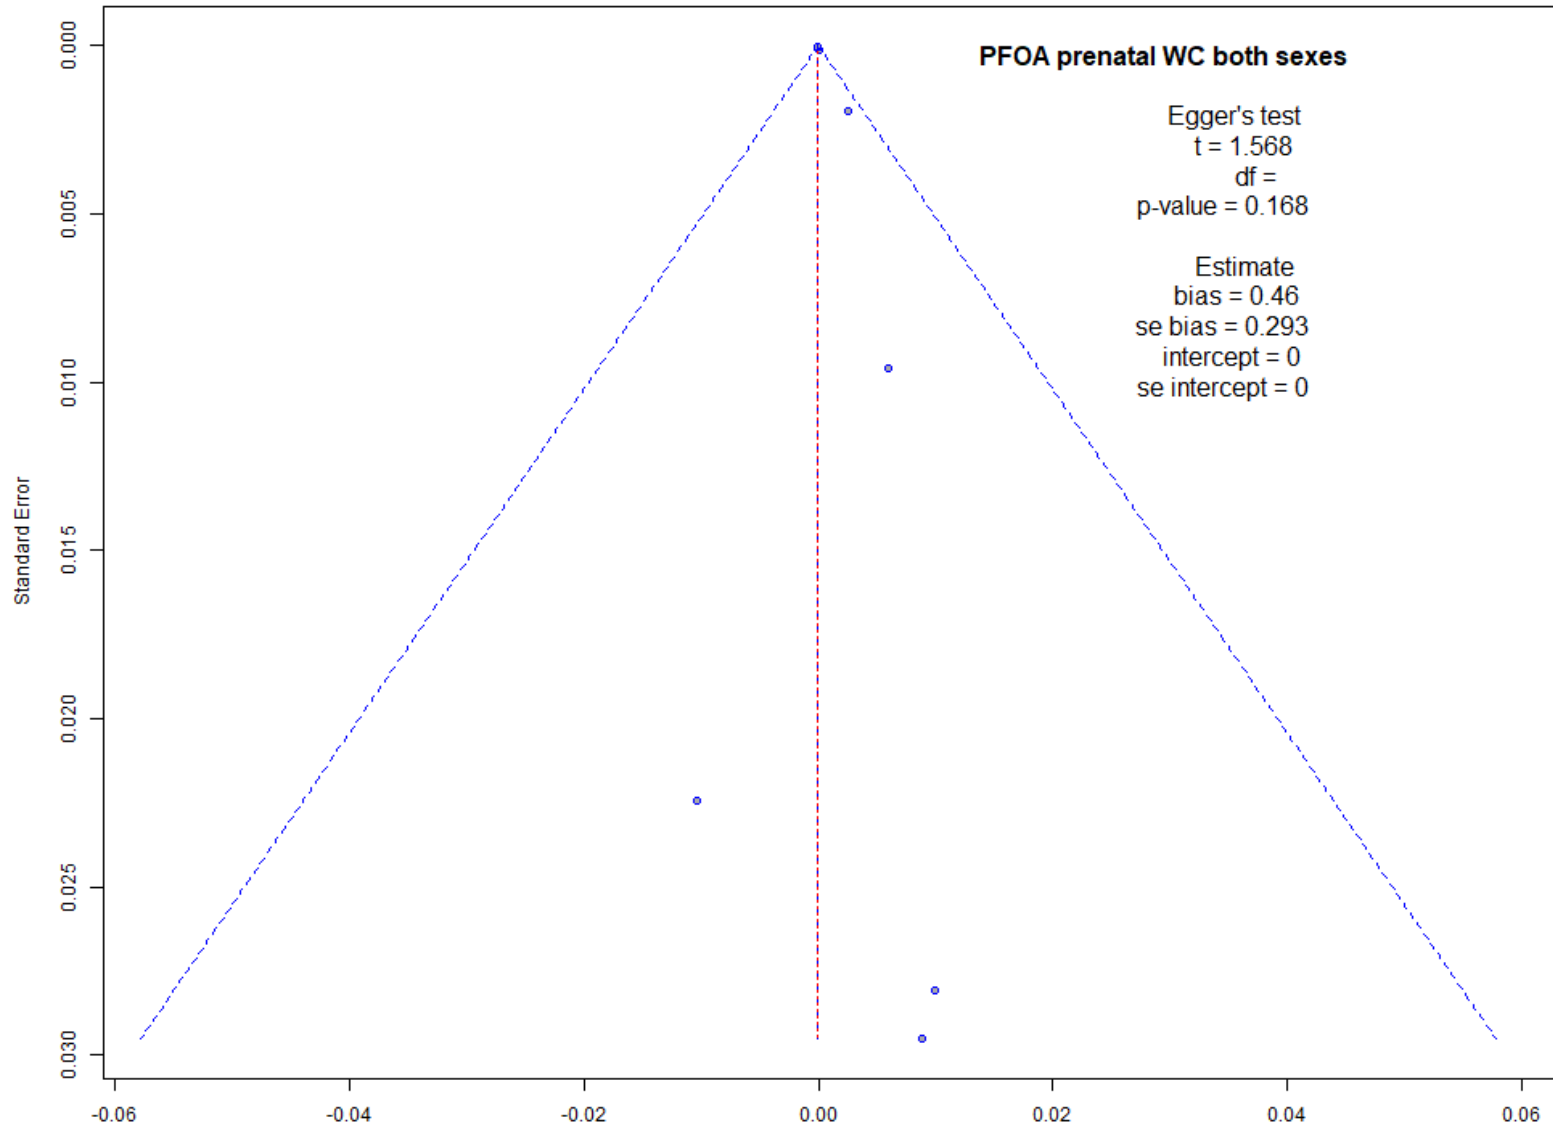



Prenatal and childhood exposure to per-/polyfluoroalkyl substances (PFASs) and its associations with childhood overweight and/or obesity: a systematic review with meta-analyses

Gianfranco Frigerio, Chiara Matilde Ferrari, and Silvia Fustinoni

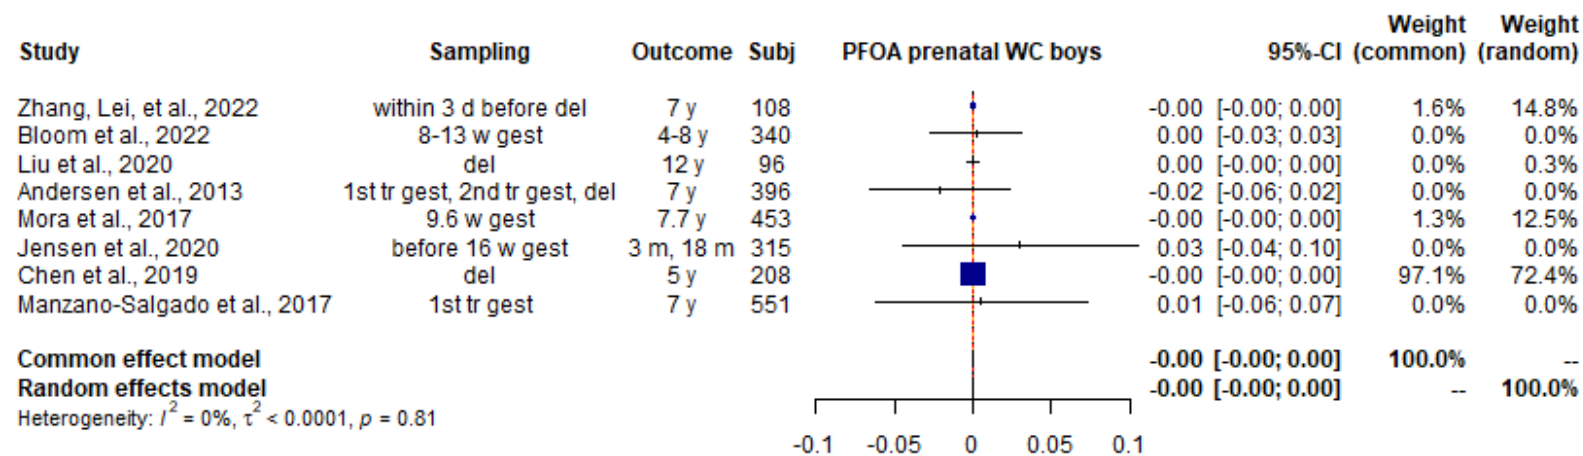

# Prenatal and childhood exposure to per-/polyfluoroalkyl substances (PFASs) and its associations with childhood overweight and/or obesity: a systematic review with meta-analyses

Gianfranco Frigerio, Chiara Matilde Ferrari, and Silvia Fustinoni

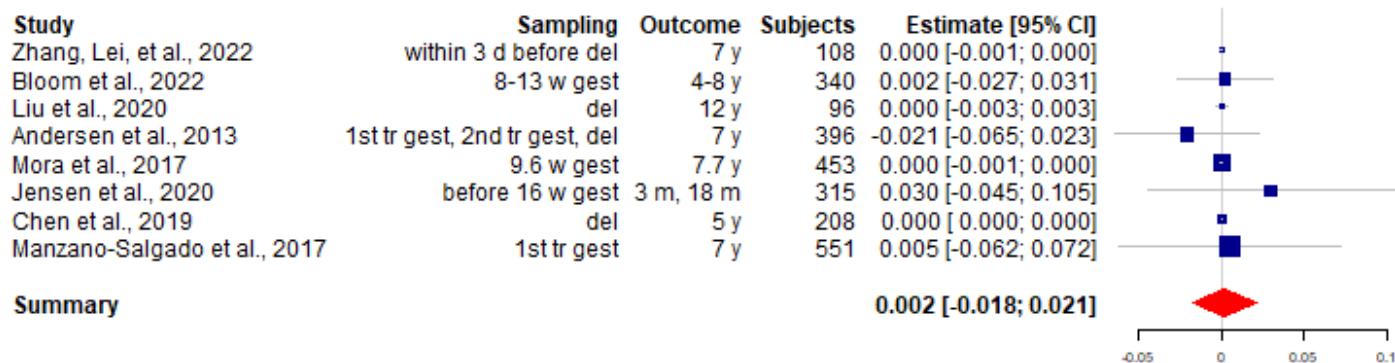

Prenatal and childhood exposure to per-/polyfluoroalkyl substances (PFASs) and its associations with childhood overweight and/or obesity: a systematic review with meta-analyses

Gianfranco Frigerio, Chiara Matilde Ferrari, and Silvia Fustinoni

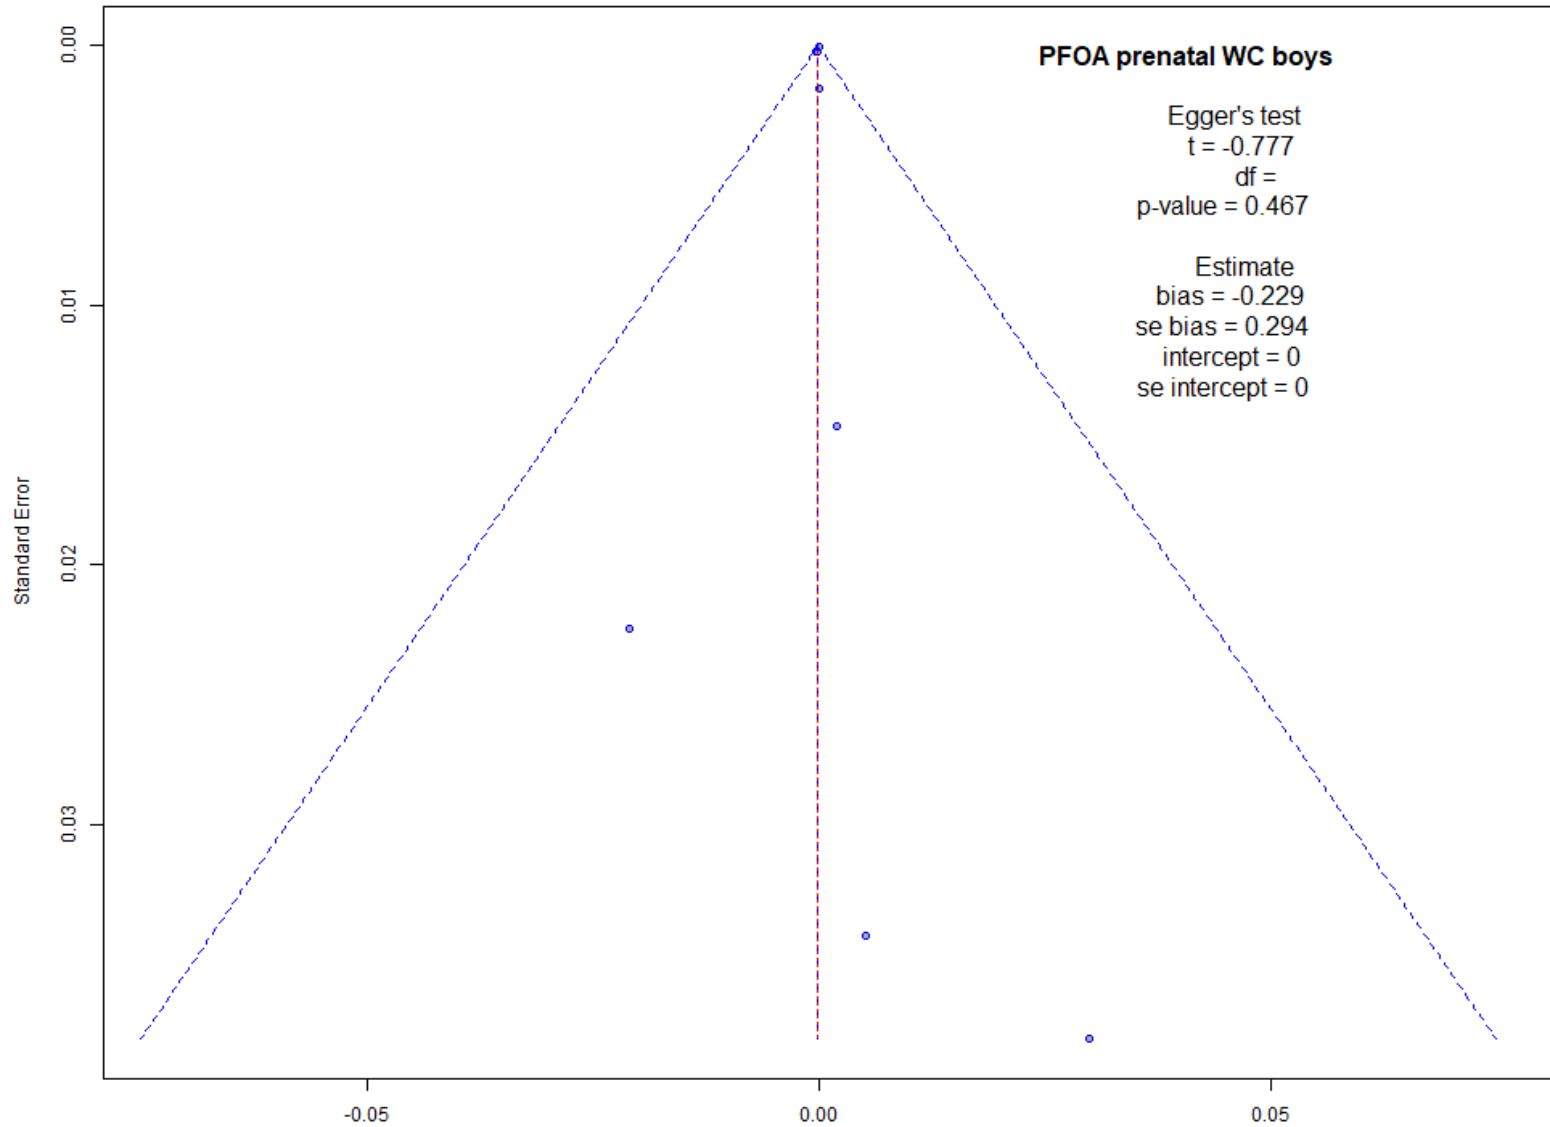

# Prenatal and childhood exposure to per-/polyfluoroalkyl substances (PFASs) and its associations with childhood overweight and/or obesity: a systematic review with meta-analyses

Gianfranco Frigerio, Chiara Matilde Ferrari, and Silvia Fustinoni

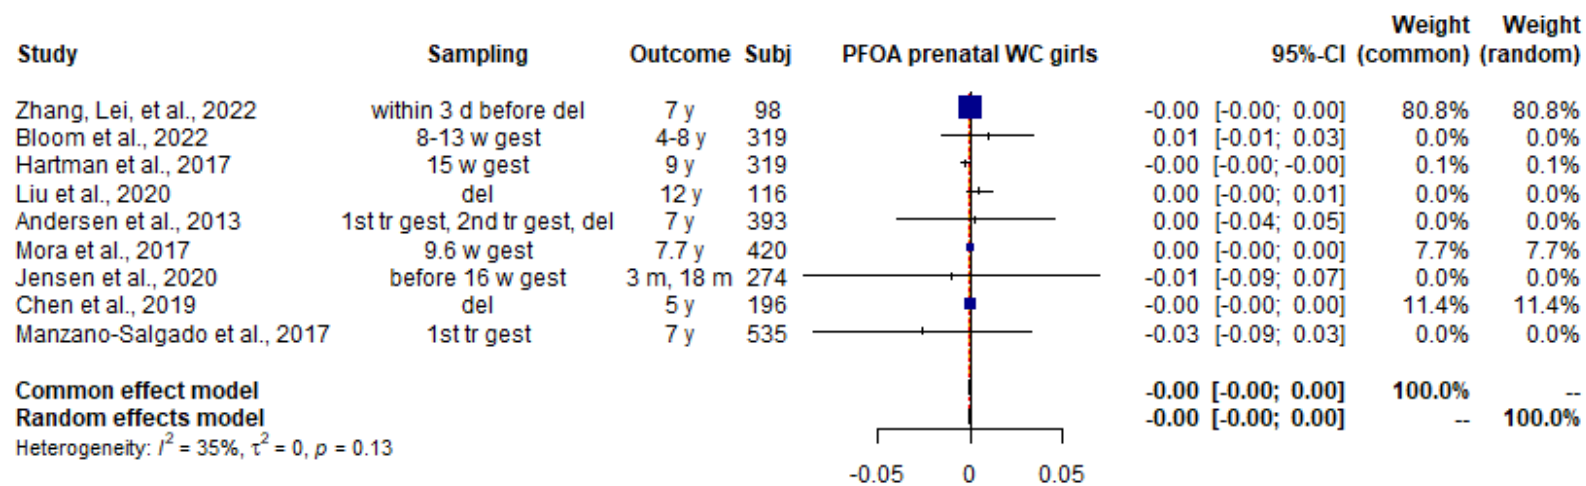

# Prenatal and childhood exposure to per-/polyfluoroalkyl substances (PFASs) and its associations with childhood overweight and/or obesity: a systematic review with meta-analyses

Gianfranco Frigerio, Chiara Matilde Ferrari, and Silvia Fustinoni

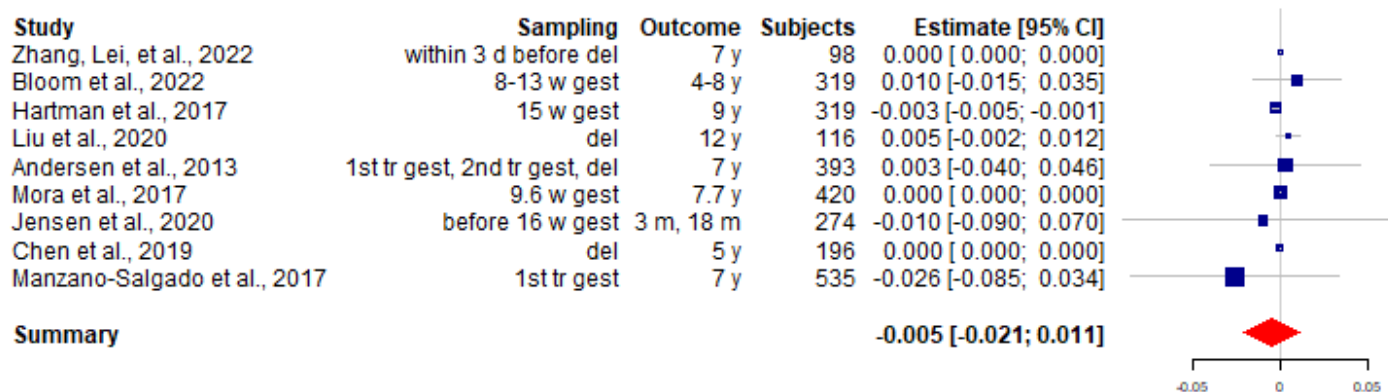

Prenatal and childhood exposure to per-/polyfluoroalkyl substances (PFASs) and its associations with childhood overweight and/or obesity: a systematic review with meta-analyses

Gianfranco Frigerio, Chiara Matilde Ferrari, and Silvia Fustinoni

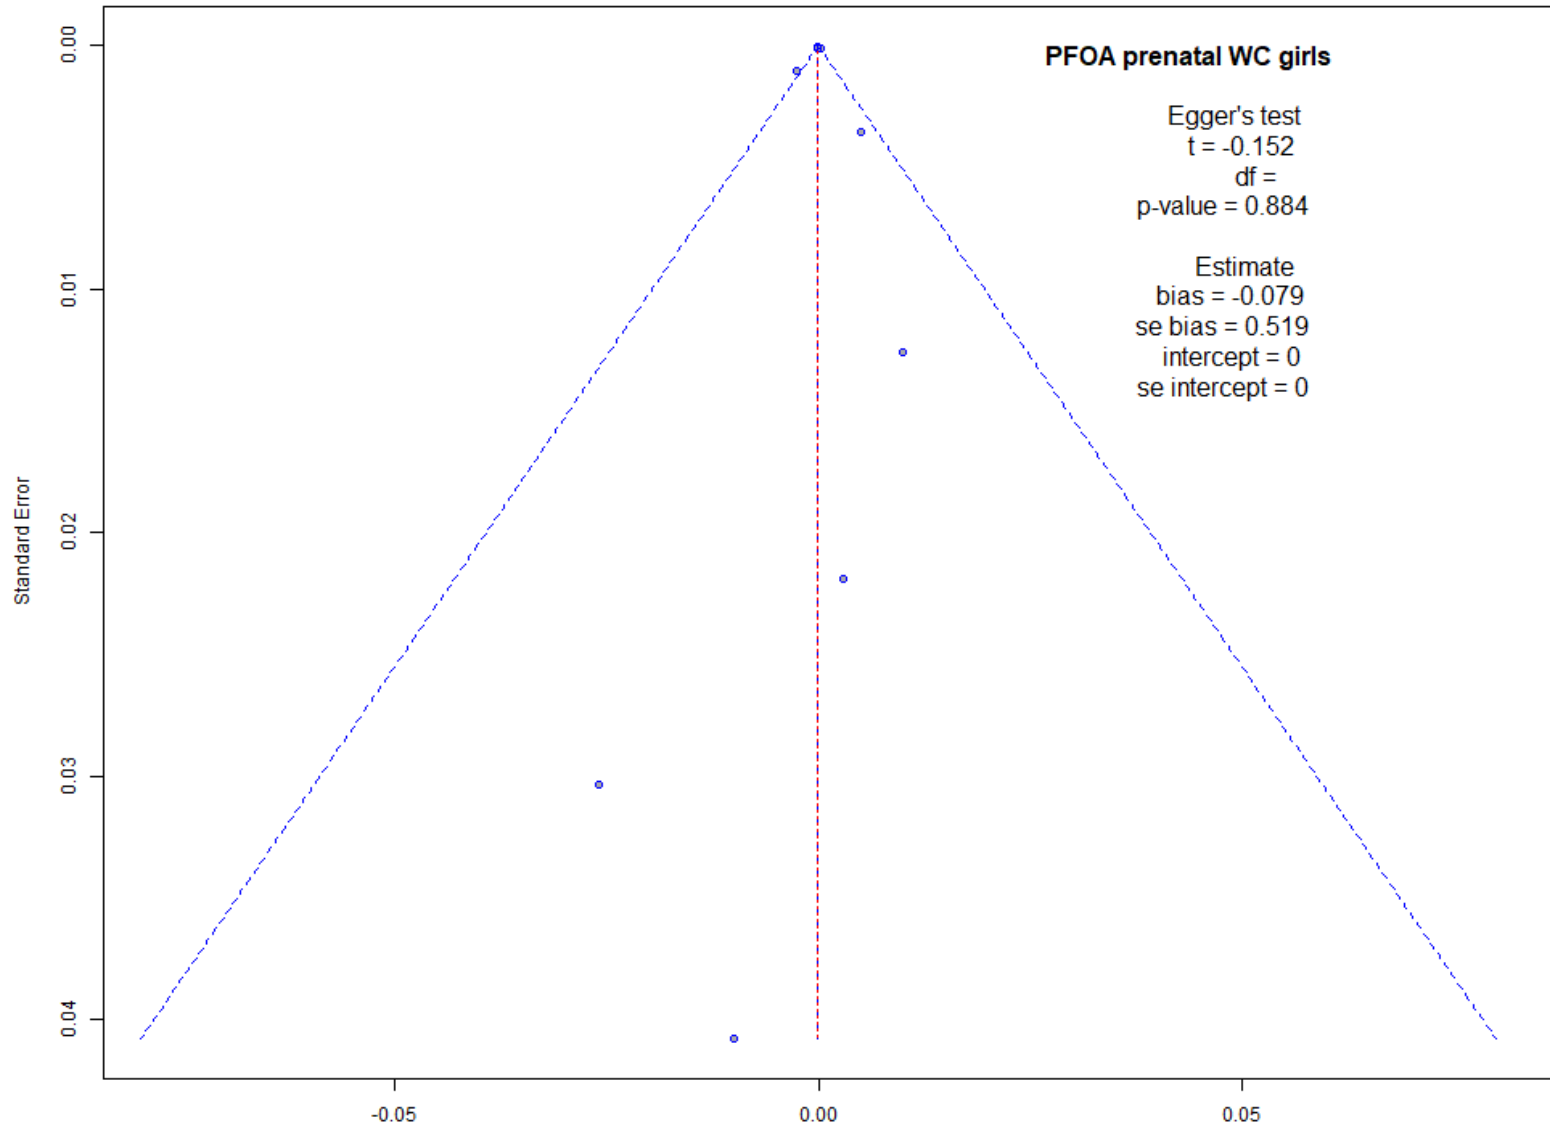

Prenatal and childhood exposure to per-/polyfluoroalkyl substances (PFASs) and its associations with childhood overweight and/or obesity: a systematic review with meta-analyses

Gianfranco Frigerio, Chiara Matilde Ferrari, and Silvia Fustinoni

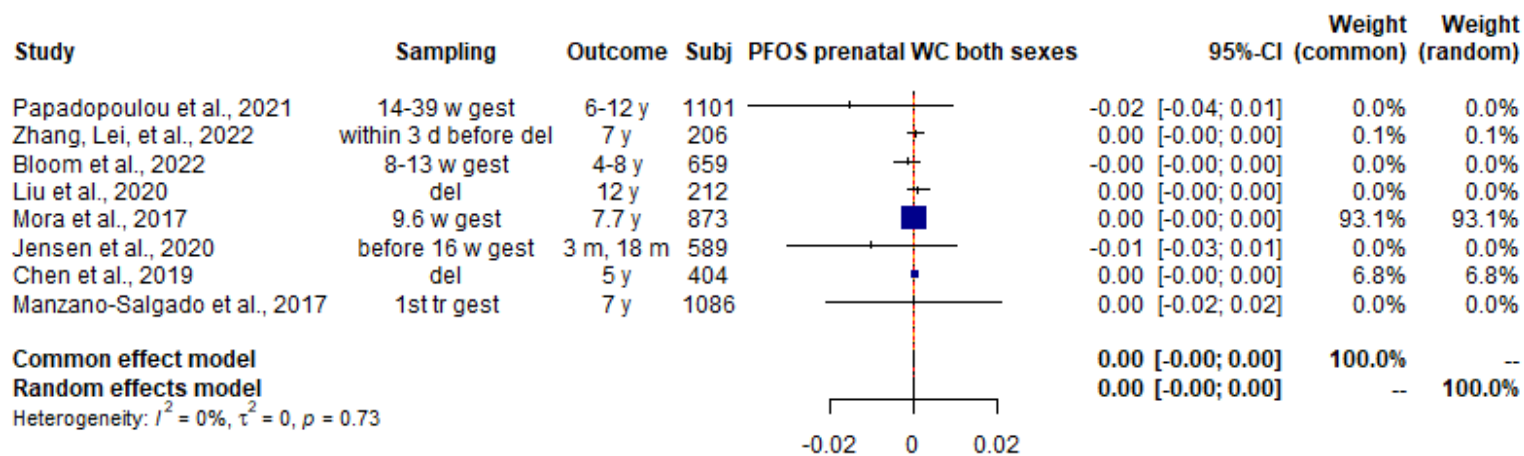

# Prenatal and childhood exposure to per-/polyfluoroalkyl substances (PFASs) and its associations with childhood overweight and/or obesity: a systematic review with meta-analyses

Gianfranco Frigerio, Chiara Matilde Ferrari, and Silvia Fustinoni

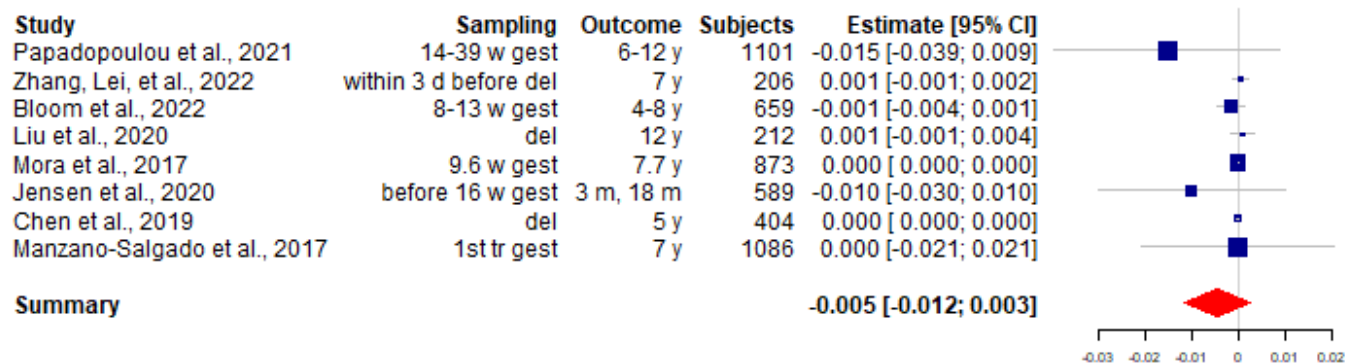



# Prenatal and childhood exposure to per-/polyfluoroalkyl substances (PFASs) and its associations with childhood overweight and/or obesity: a systematic review with meta-analyses

Gianfranco Frigerio, Chiara Matilde Ferrari, and Silvia Fustinoni

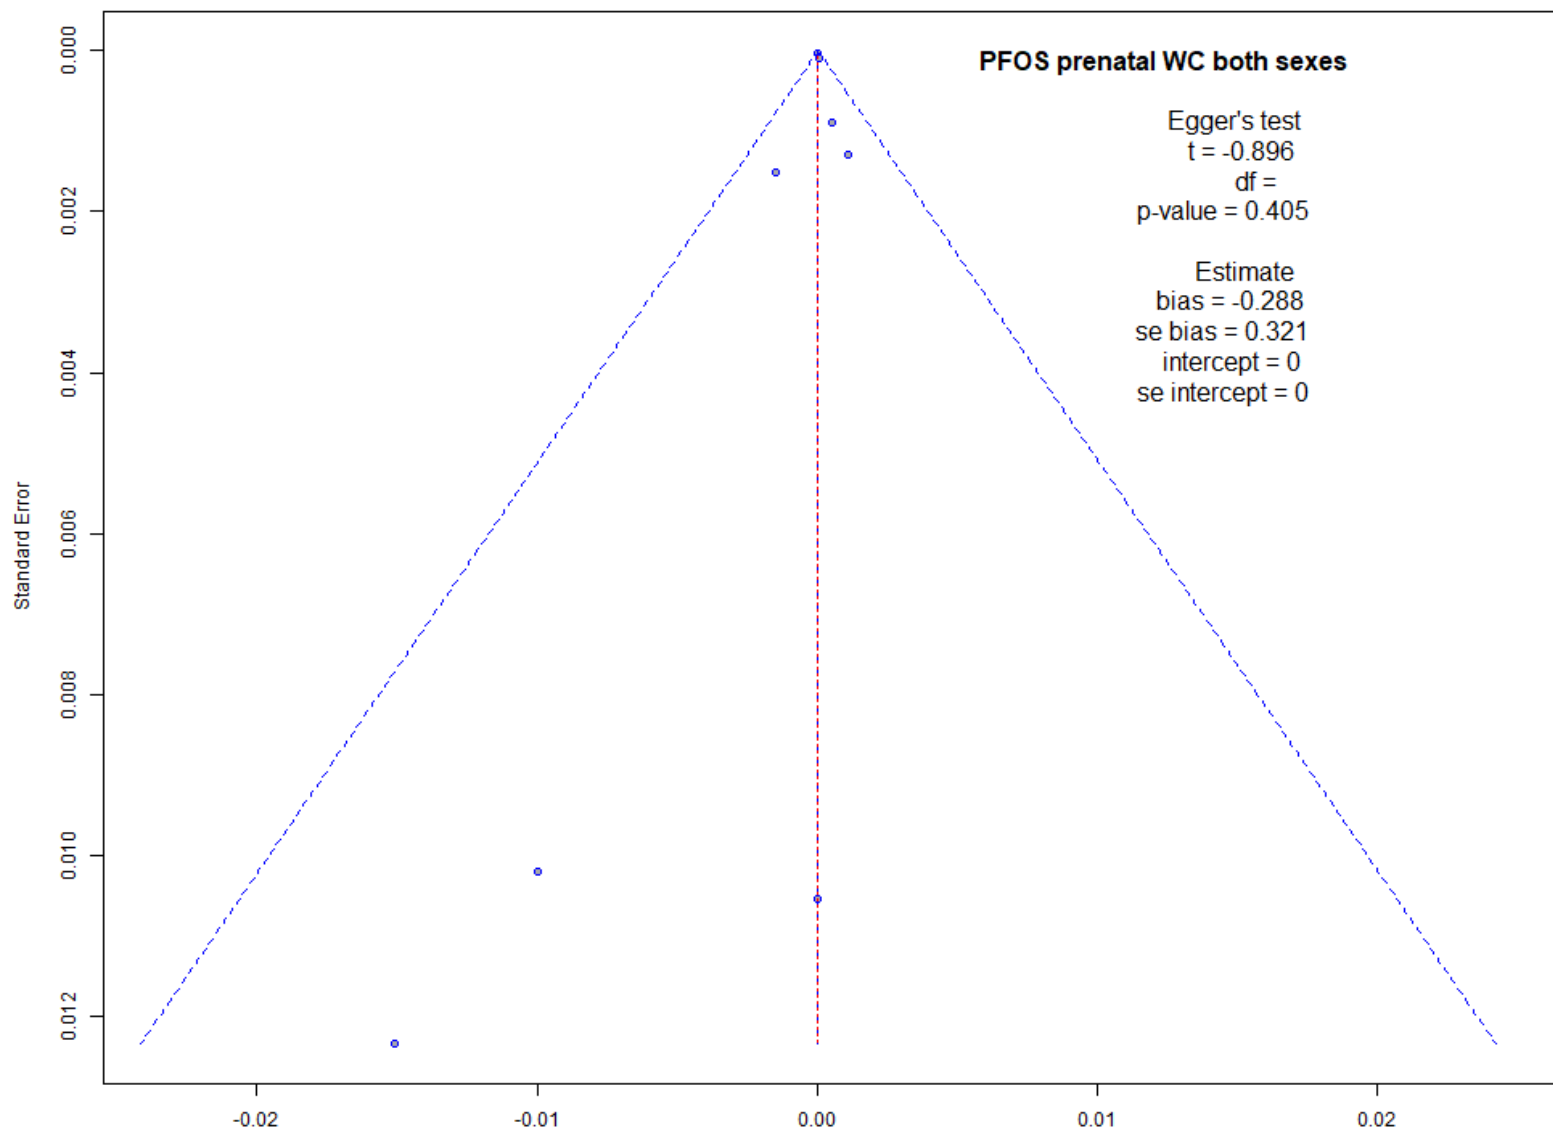

Prenatal and childhood exposure to per-/polyfluoroalkyl substances (PFASs) and its associations with childhood overweight and/or obesity: a systematic review with meta-analyses

Gianfranco Frigerio, Chiara Matilde Ferrari, and Silvia Fustinoni

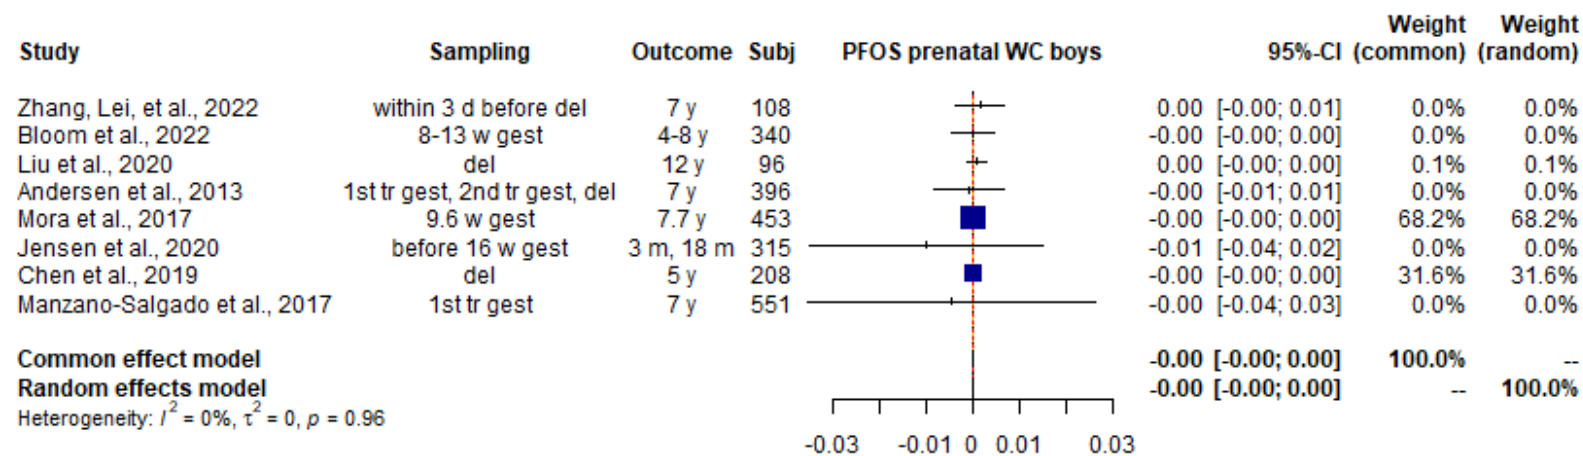

# Prenatal and childhood exposure to per-/polyfluoroalkyl substances (PFASs) and its associations with childhood overweight and/or obesity: a systematic review with meta-analyses

Gianfranco Frigerio, Chiara Matilde Ferrari, and Silvia Fustinoni

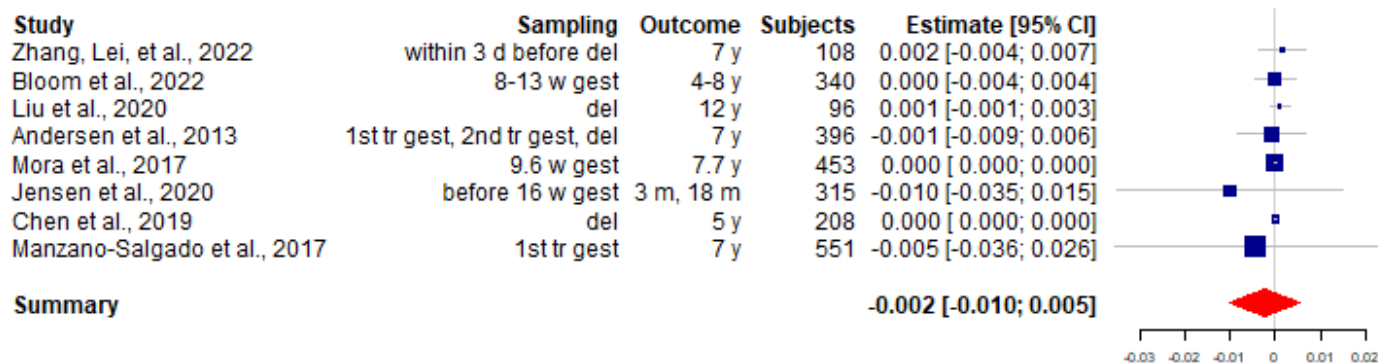

Prenatal and childhood exposure to per-/polyfluoroalkyl substances (PFASs) and its associations with childhood overweight and/or obesity: a systematic review with meta-analyses

Gianfranco Frigerio, Chiara Matilde Ferrari, and Silvia Fustinoni

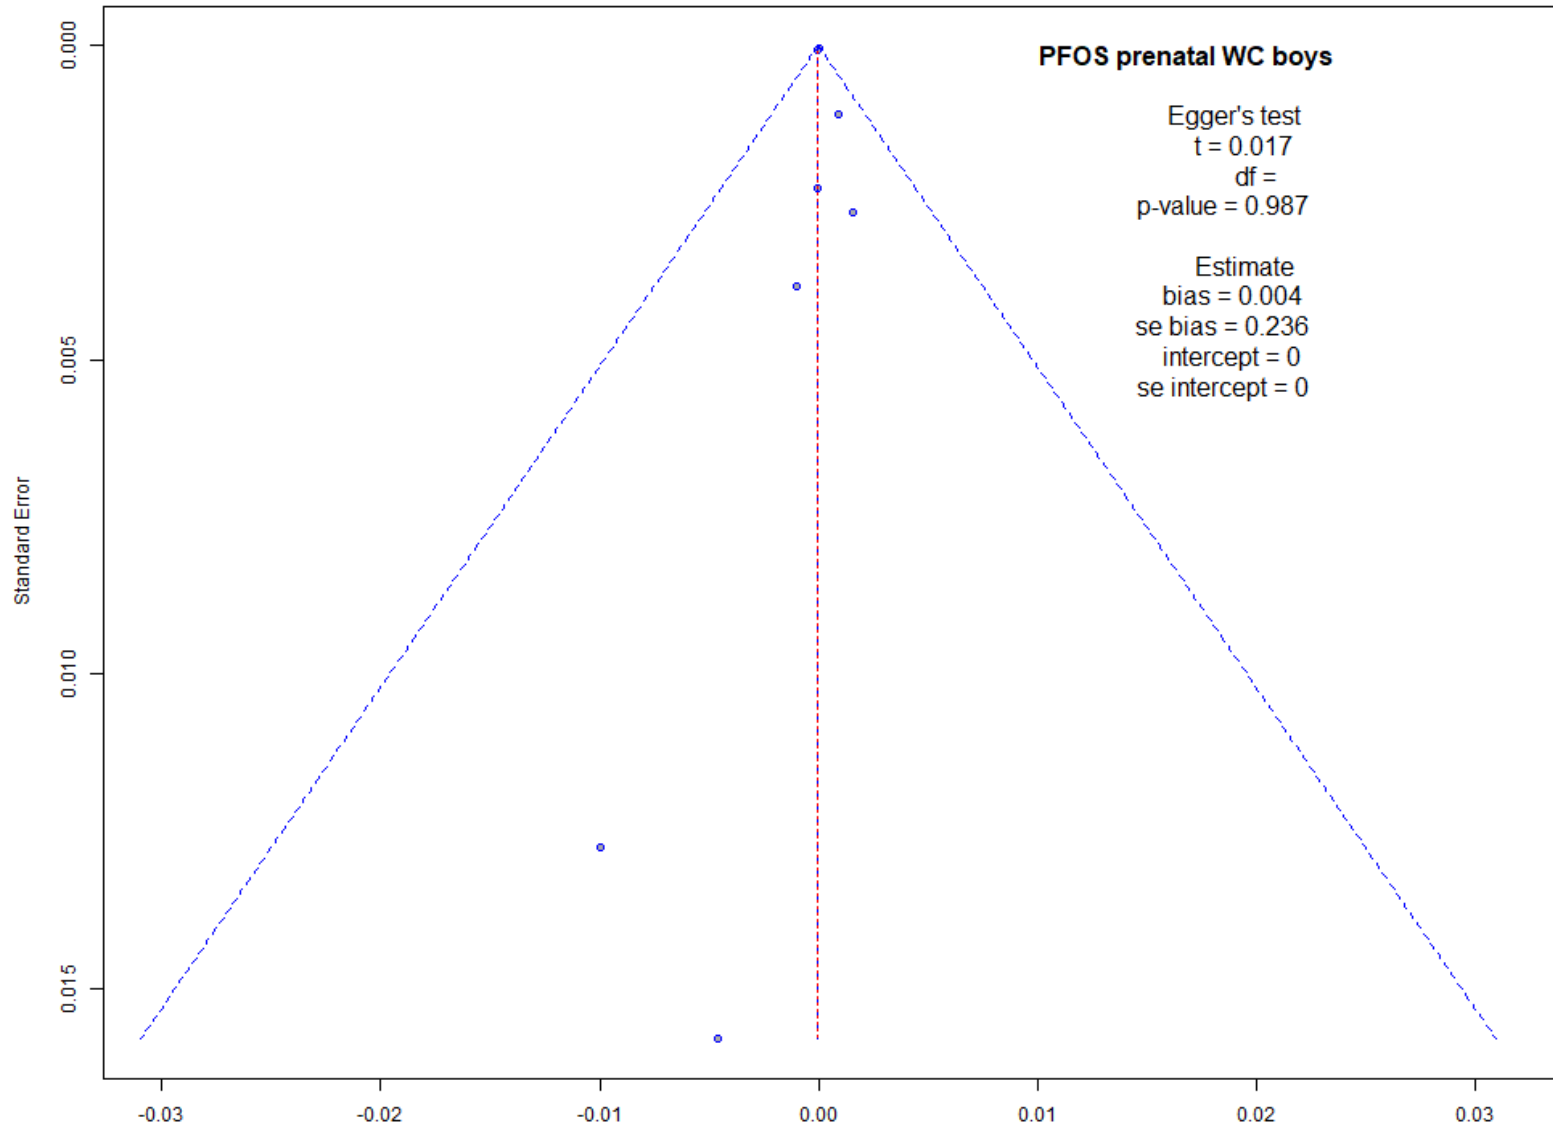

**Prenatal and childhood exposure to per-/polyfluoroalkyl substances (PFASs) and its associations with childhood overweight and/or obesity: a systematic review with meta-analyses**

Gianfranco Frigerio, Chiara Matilde Ferrari, and Silvia Fustinoni

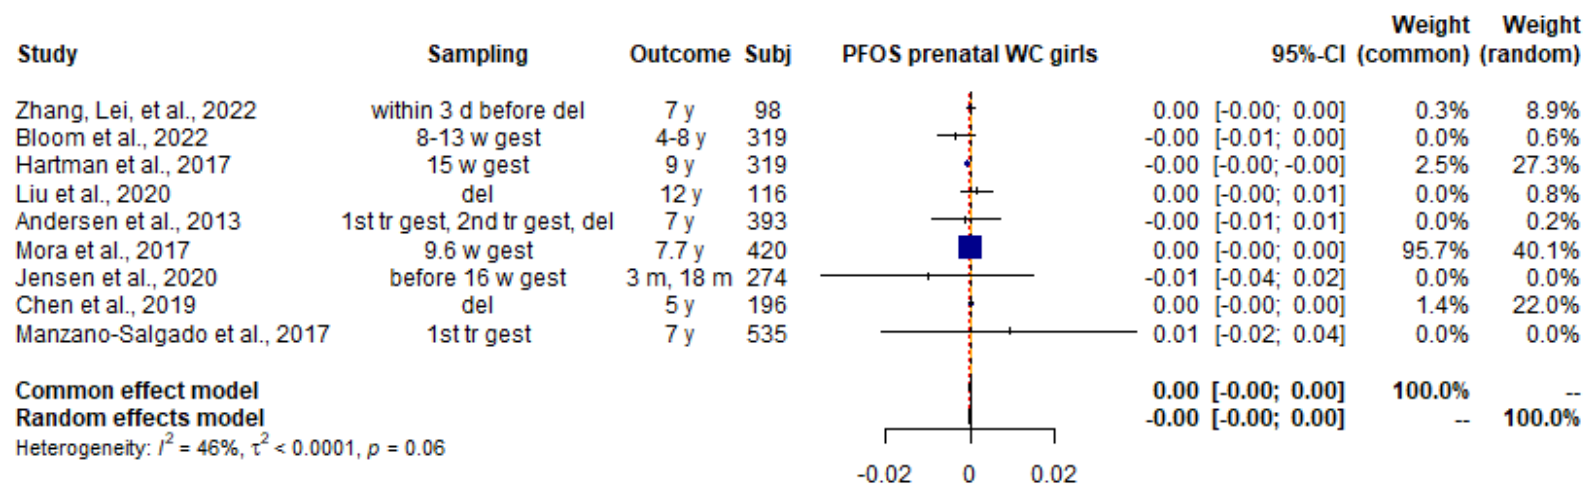

# Prenatal and childhood exposure to per-/polyfluoroalkyl substances (PFASs) and its associations with childhood overweight and/or obesity: a systematic review with meta-analyses

Gianfranco Frigerio, Chiara Matilde Ferrari, and Silvia Fustinoni

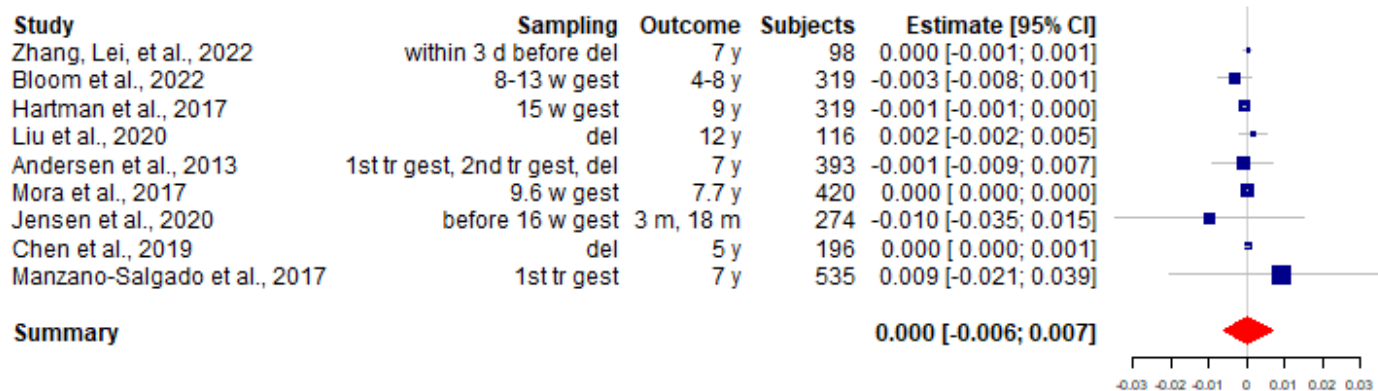

Prenatal and childhood exposure to per-/polyfluoroalkyl substances (PFASs) and its associations with childhood overweight and/or obesity: a systematic review with meta-analyses

Gianfranco Frigerio, Chiara Matilde Ferrari, and Silvia Fustinoni

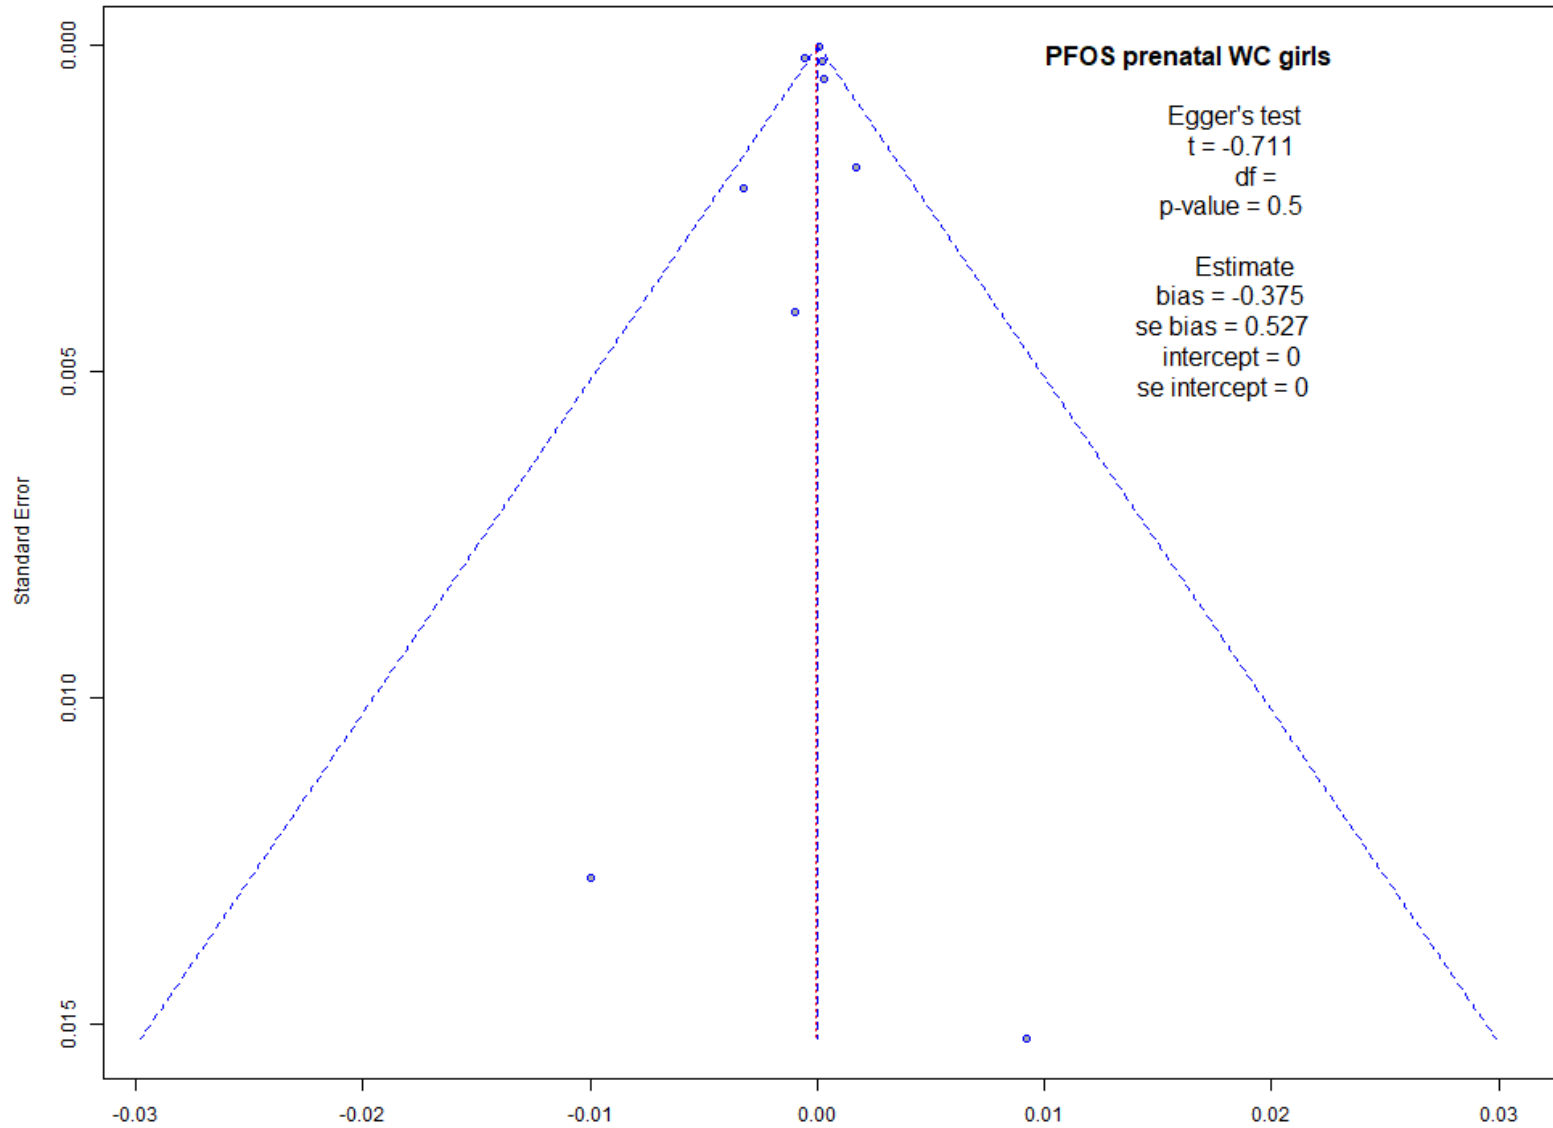

# Prenatal and childhood exposure to per-/polyfluoroalkyl substances (PFASs) and its associations with childhood overweight and/or obesity: a systematic review with meta-analyses

Gianfranco Frigerio, Chiara Matilde Ferrari, and Silvia Fustinoni

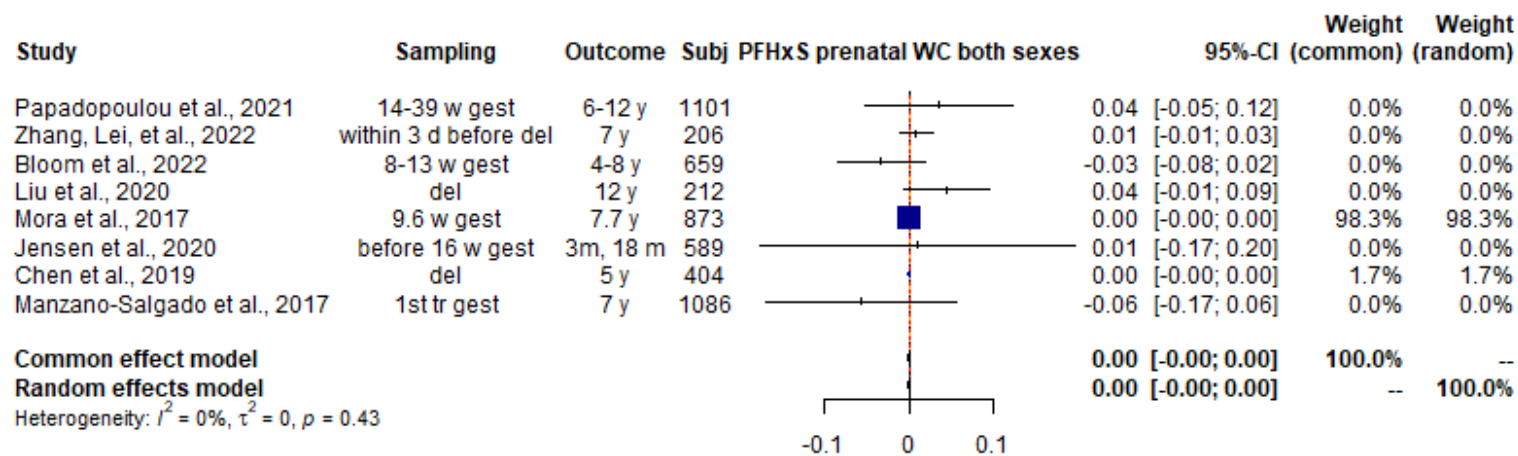



# Prenatal and childhood exposure to per-/polyfluoroalkyl substances (PFASs) and its associations with childhood overweight and/or obesity: a systematic review with meta-analyses

Gianfranco Frigerio, Chiara Matilde Ferrari, and Silvia Fustinoni

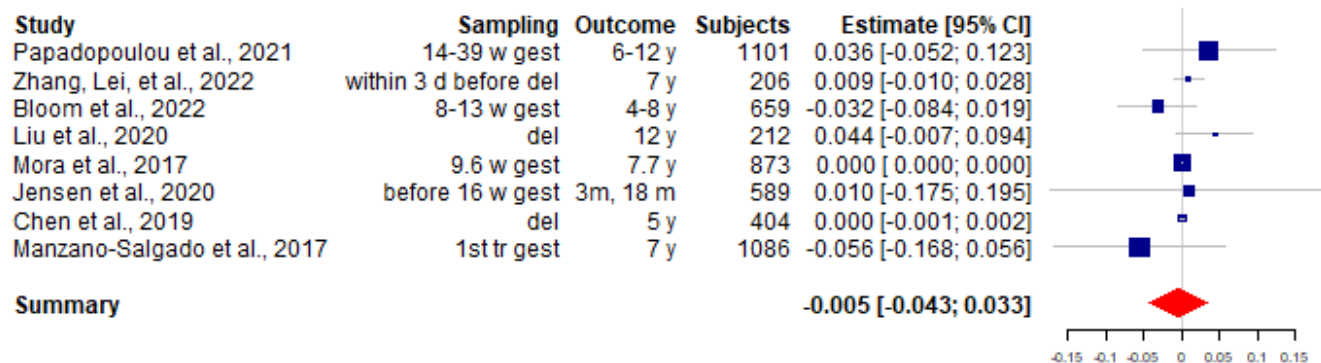

Prenatal and childhood exposure to per-/polyfluoroalkyl substances (PFASs) and its associations with childhood overweight and/or obesity: a systematic review with meta-analyses

Gianfranco Frigerio, Chiara Matilde Ferrari, and Silvia Fustinoni

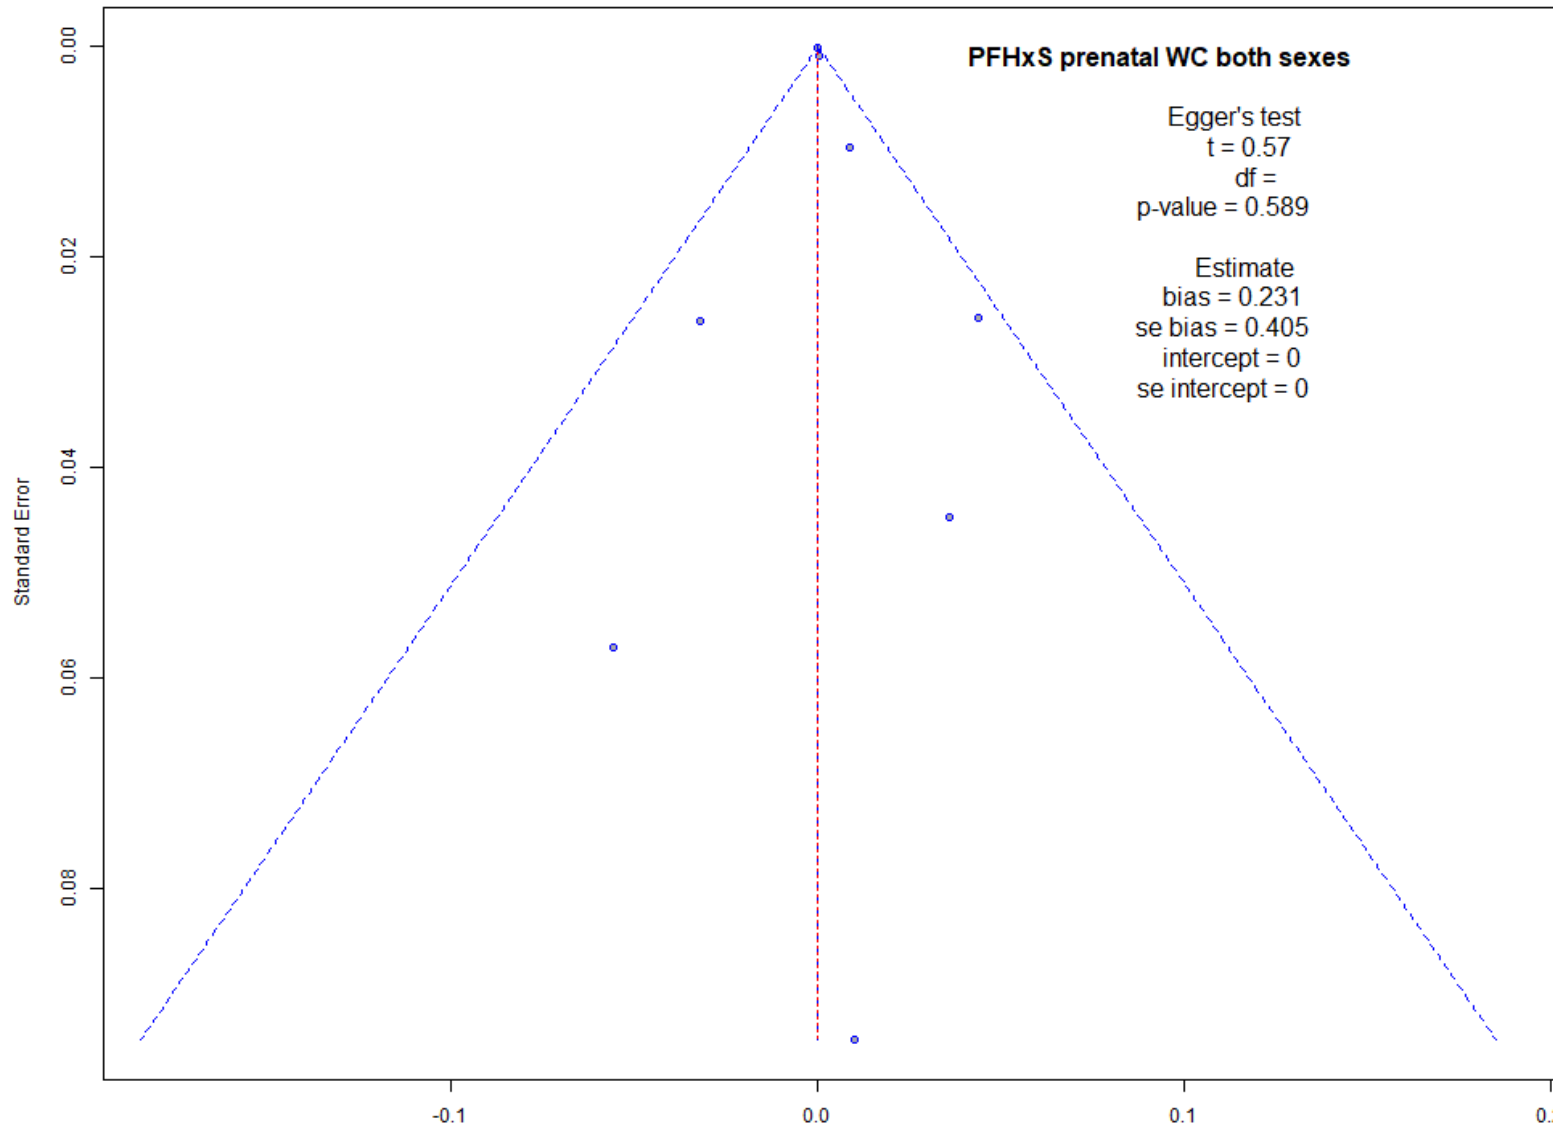

Prenatal and childhood exposure to per-/polyfluoroalkyl substances (PFASs) and its associations with childhood overweight and/or obesity: a systematic review with meta-analyses

Gianfranco Frigerio, Chiara Matilde Ferrari, and Silvia Fustinoni

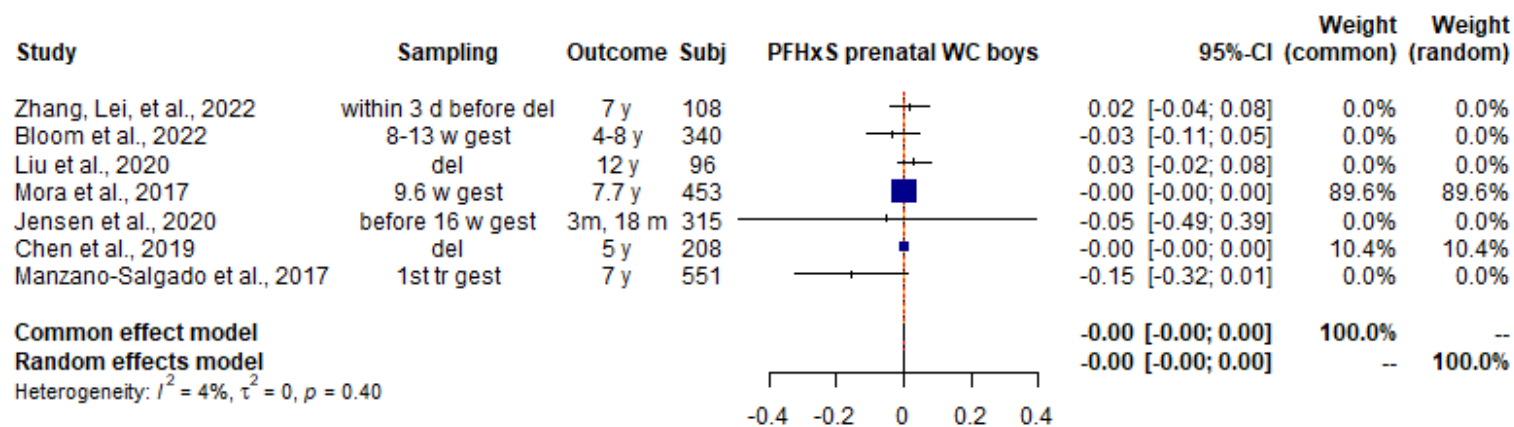

**Prenatal and childhood exposure to per-/polyfluoroalkyl substances (PFASs) and its associations with childhood overweight and/or obesity: a systematic review with meta-analyses**

Gianfranco Frigerio, Chiara Matilde Ferrari, and Silvia Fustinoni

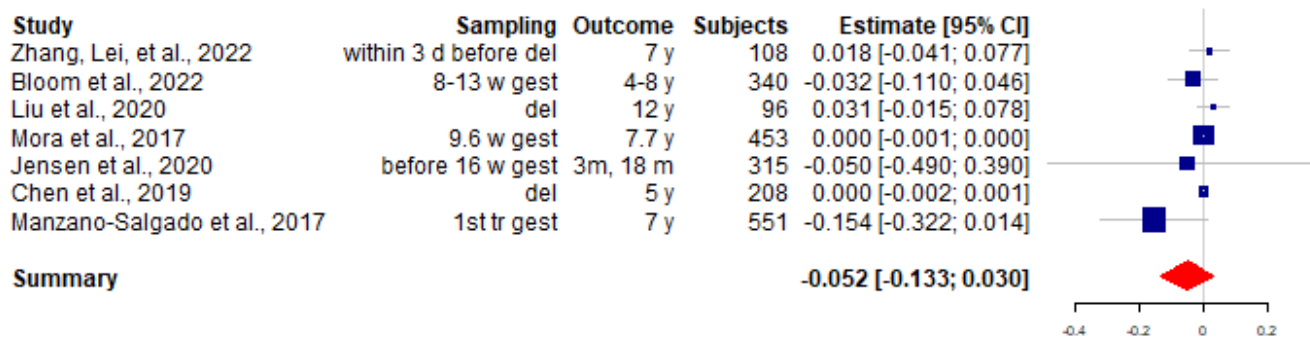

Prenatal and childhood exposure to per-/polyfluoroalkyl substances (PFASs) and its associations with childhood overweight and/or obesity: a systematic review with meta-analyses

Gianfranco Frigerio, Chiara Matilde Ferrari, and Silvia Fustinoni

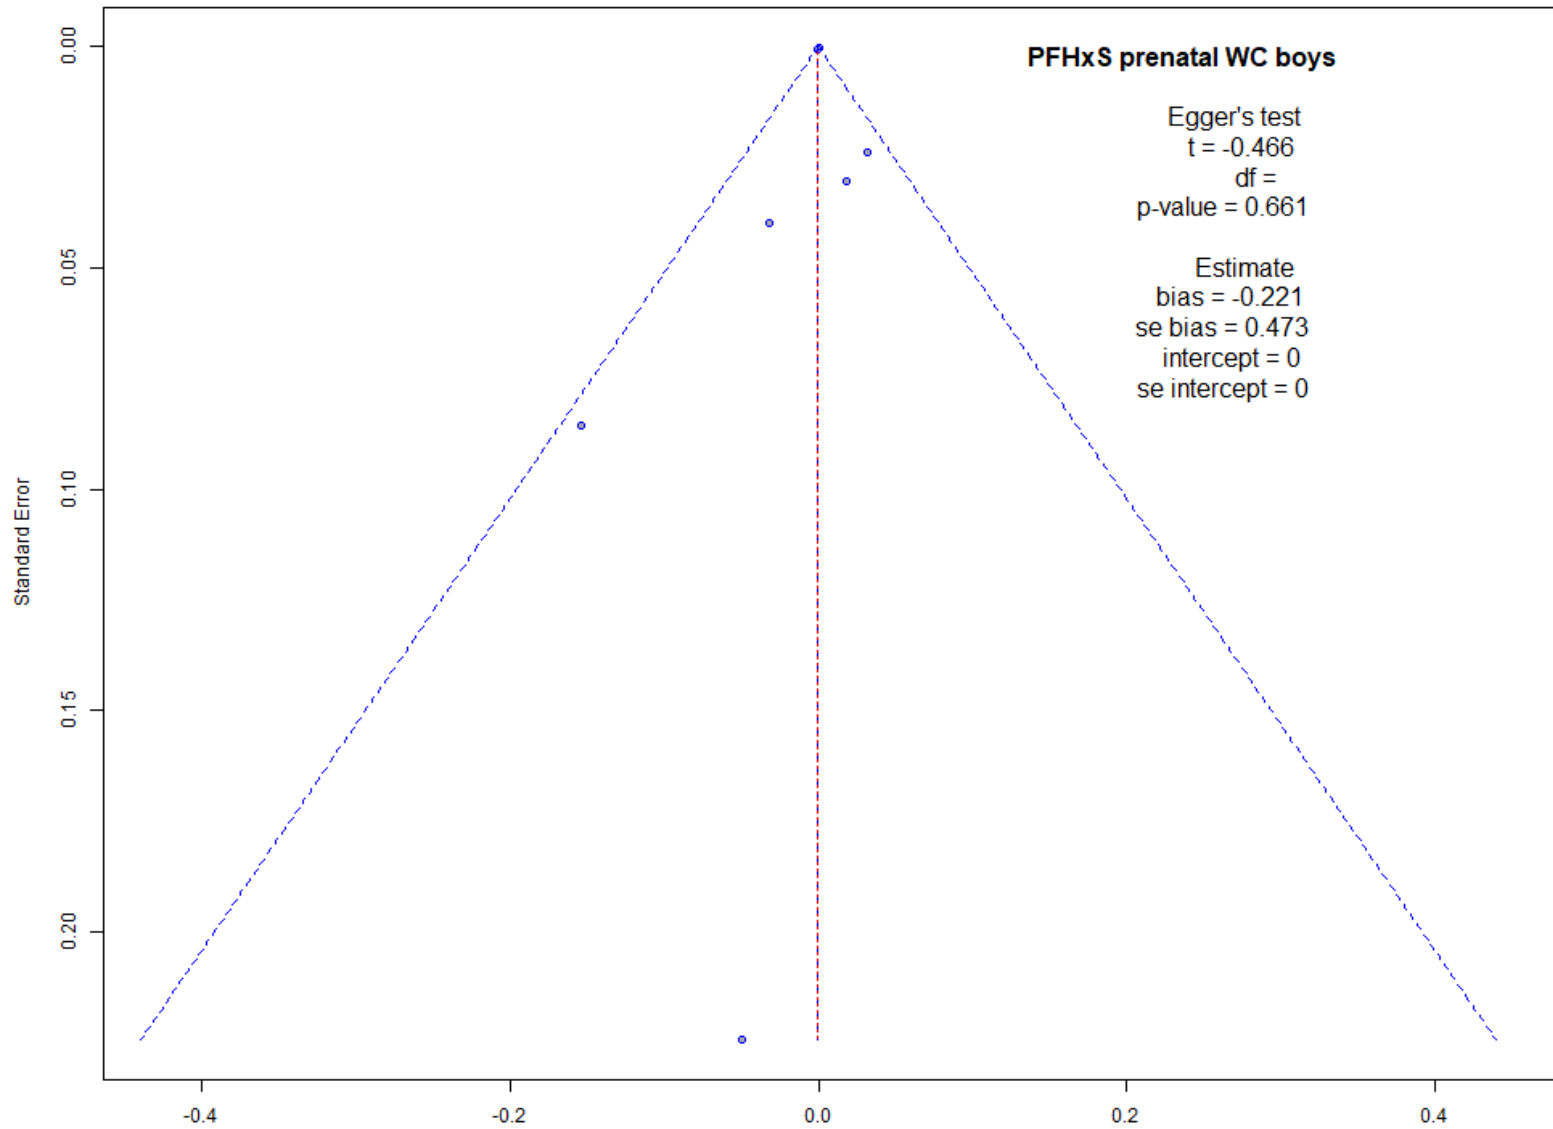

Prenatal and childhood exposure to per-/polyfluoroalkyl substances (PFASs) and its associations with childhood overweight and/or obesity: a systematic review with meta-analyses

Gianfranco Frigerio, Chiara Matilde Ferrari, and Silvia Fustinoni

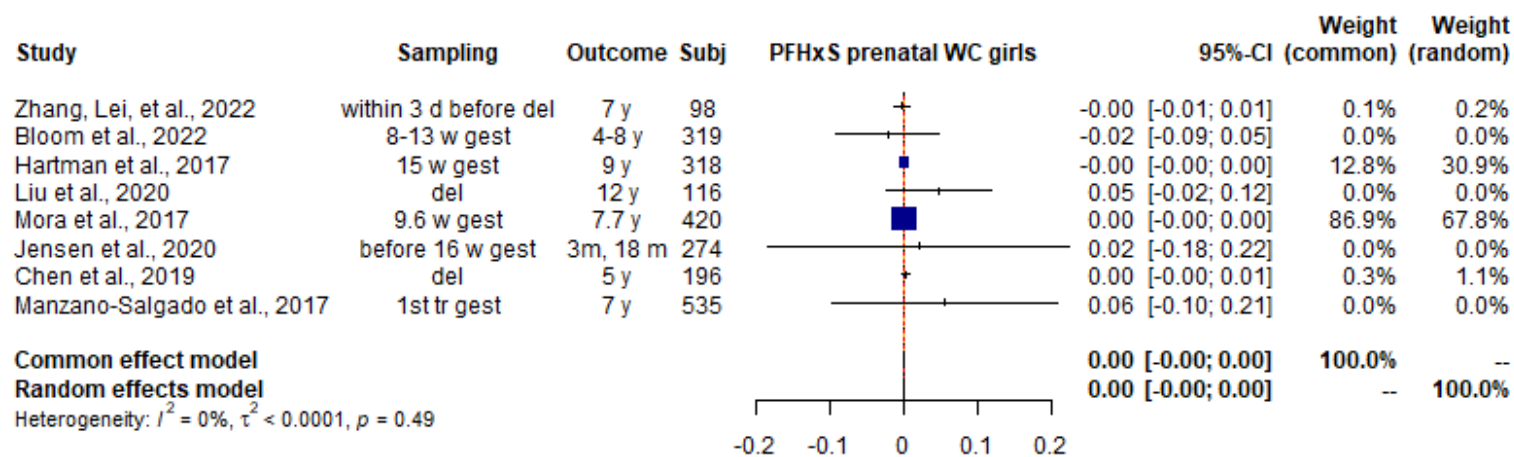

# Prenatal and childhood exposure to per-/polyfluoroalkyl substances (PFASs) and its associations with childhood overweight and/or obesity: a systematic review with meta-analyses

Gianfranco Frigerio, Chiara Matilde Ferrari, and Silvia Fustinoni

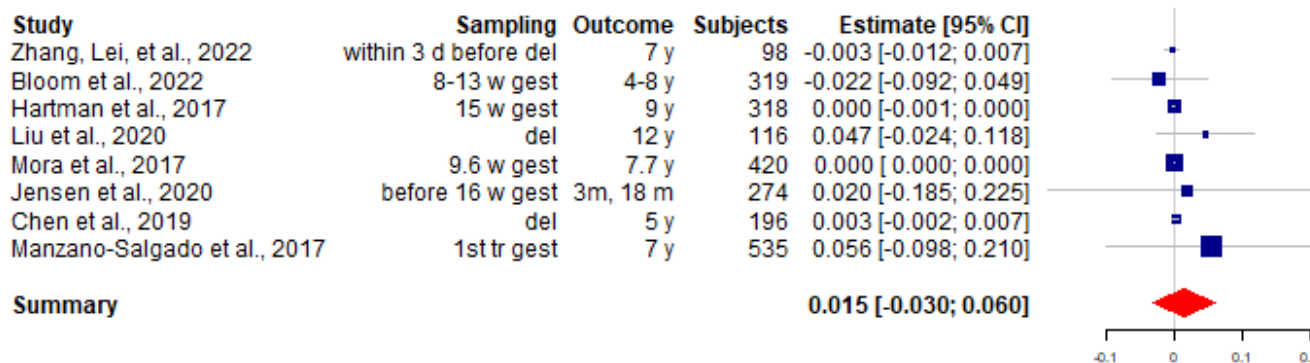

Prenatal and childhood exposure to per-/polyfluoroalkyl substances (PFASs) and its associations with childhood overweight and/or obesity: a systematic review with meta-analyses

Gianfranco Frigerio, Chiara Matilde Ferrari, and Silvia Fustinoni

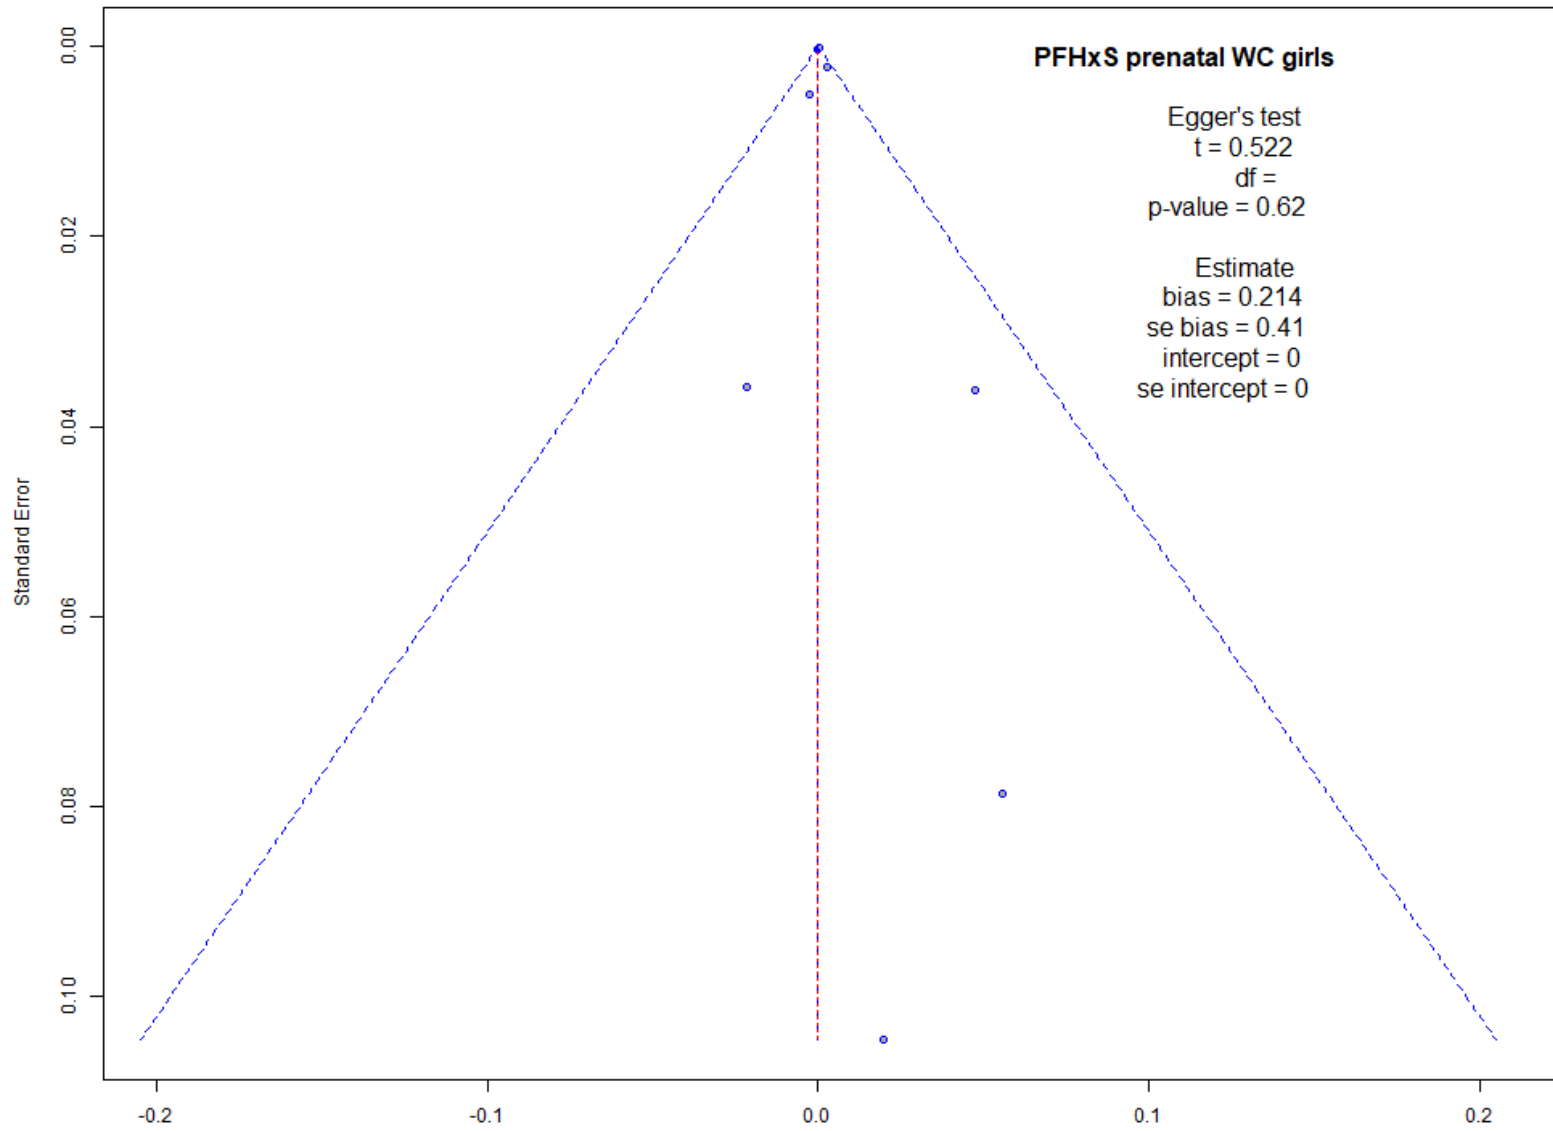



# Prenatal and childhood exposure to per-/polyfluoroalkyl substances (PFASs) and its associations with childhood overweight and/or obesity: a systematic review with meta-analyses

Gianfranco Frigerio, Chiara Matilde Ferrari, and Silvia Fustinoni

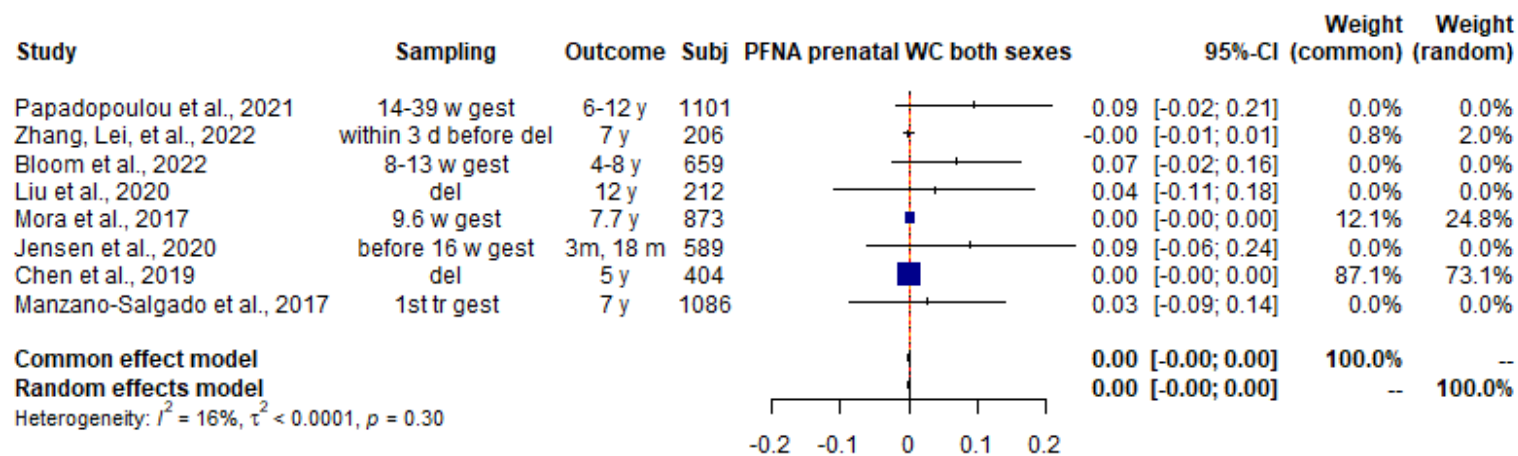

# Prenatal and childhood exposure to per-/polyfluoroalkyl substances (PFASs) and its associations with childhood overweight and/or obesity: a systematic review with meta-analyses

Gianfranco Frigerio, Chiara Matilde Ferrari, and Silvia Fustinoni

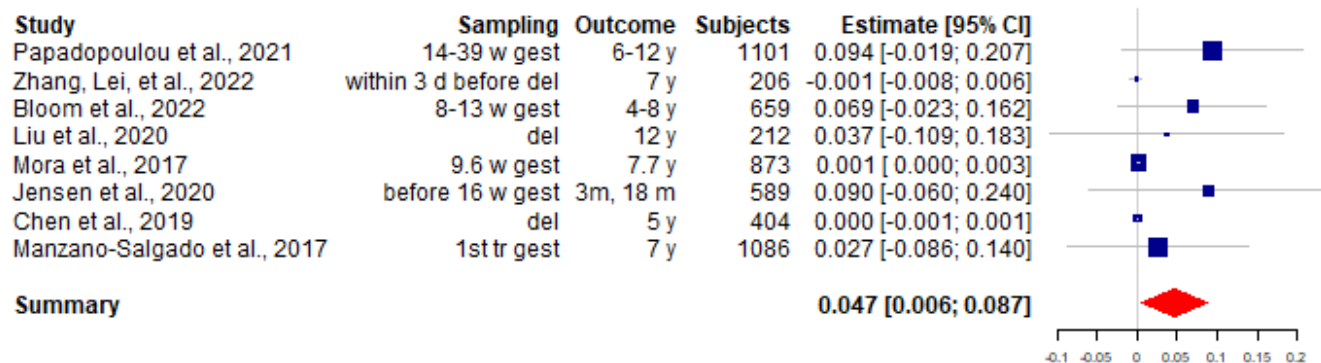

# Prenatal and childhood exposure to per-/polyfluoroalkyl substances (PFASs) and its associations with childhood overweight and/or obesity: a systematic review with meta-analyses

Gianfranco Frigerio, Chiara Matilde Ferrari, and Silvia Fustinoni

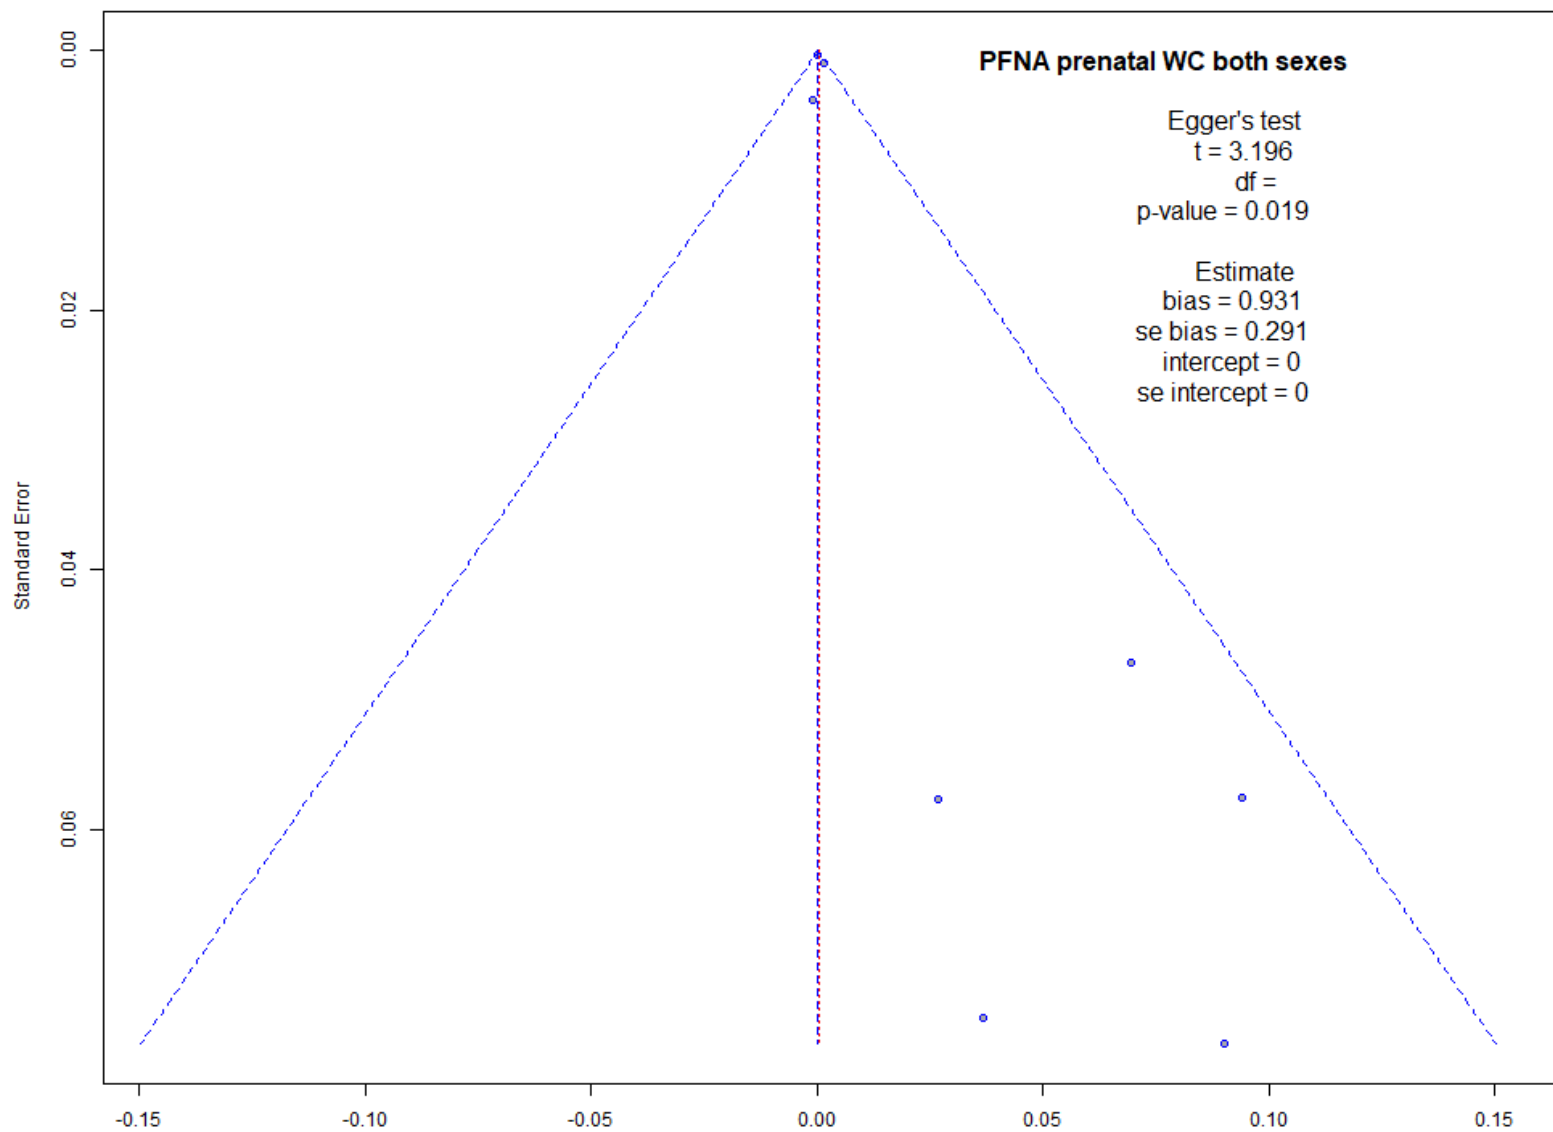

Prenatal and childhood exposure to per-/polyfluoroalkyl substances (PFASs) and its associations with childhood overweight and/or obesity: a systematic review with meta-analyses

Gianfranco Frigerio, Chiara Matilde Ferrari, and Silvia Fustinoni

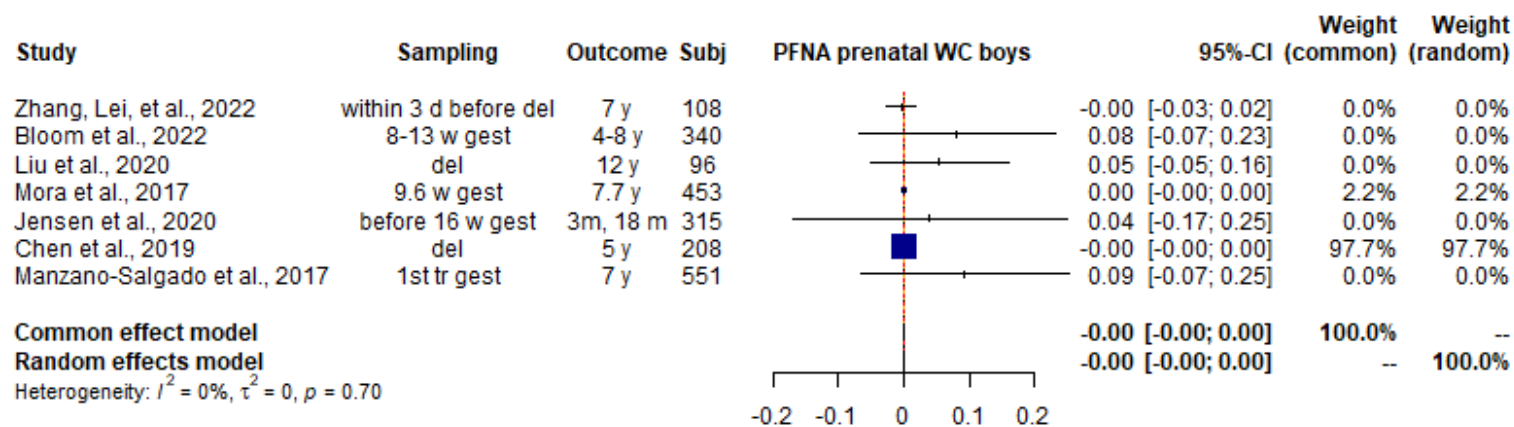

**Prenatal and childhood exposure to per-/polyfluoroalkyl substances (PFASs) and its associations with childhood overweight and/or obesity: a systematic review with meta-analyses**

Gianfranco Frigerio, Chiara Matilde Ferrari, and Silvia Fustinoni

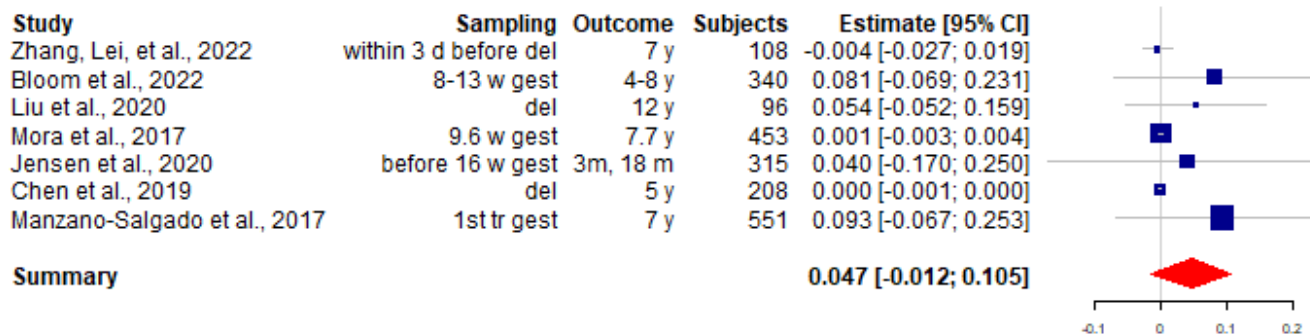

Prenatal and childhood exposure to per-/polyfluoroalkyl substances (PFASs) and its associations with childhood overweight and/or obesity: a systematic review with meta-analyses

Gianfranco Frigerio, Chiara Matilde Ferrari, and Silvia Fustinoni

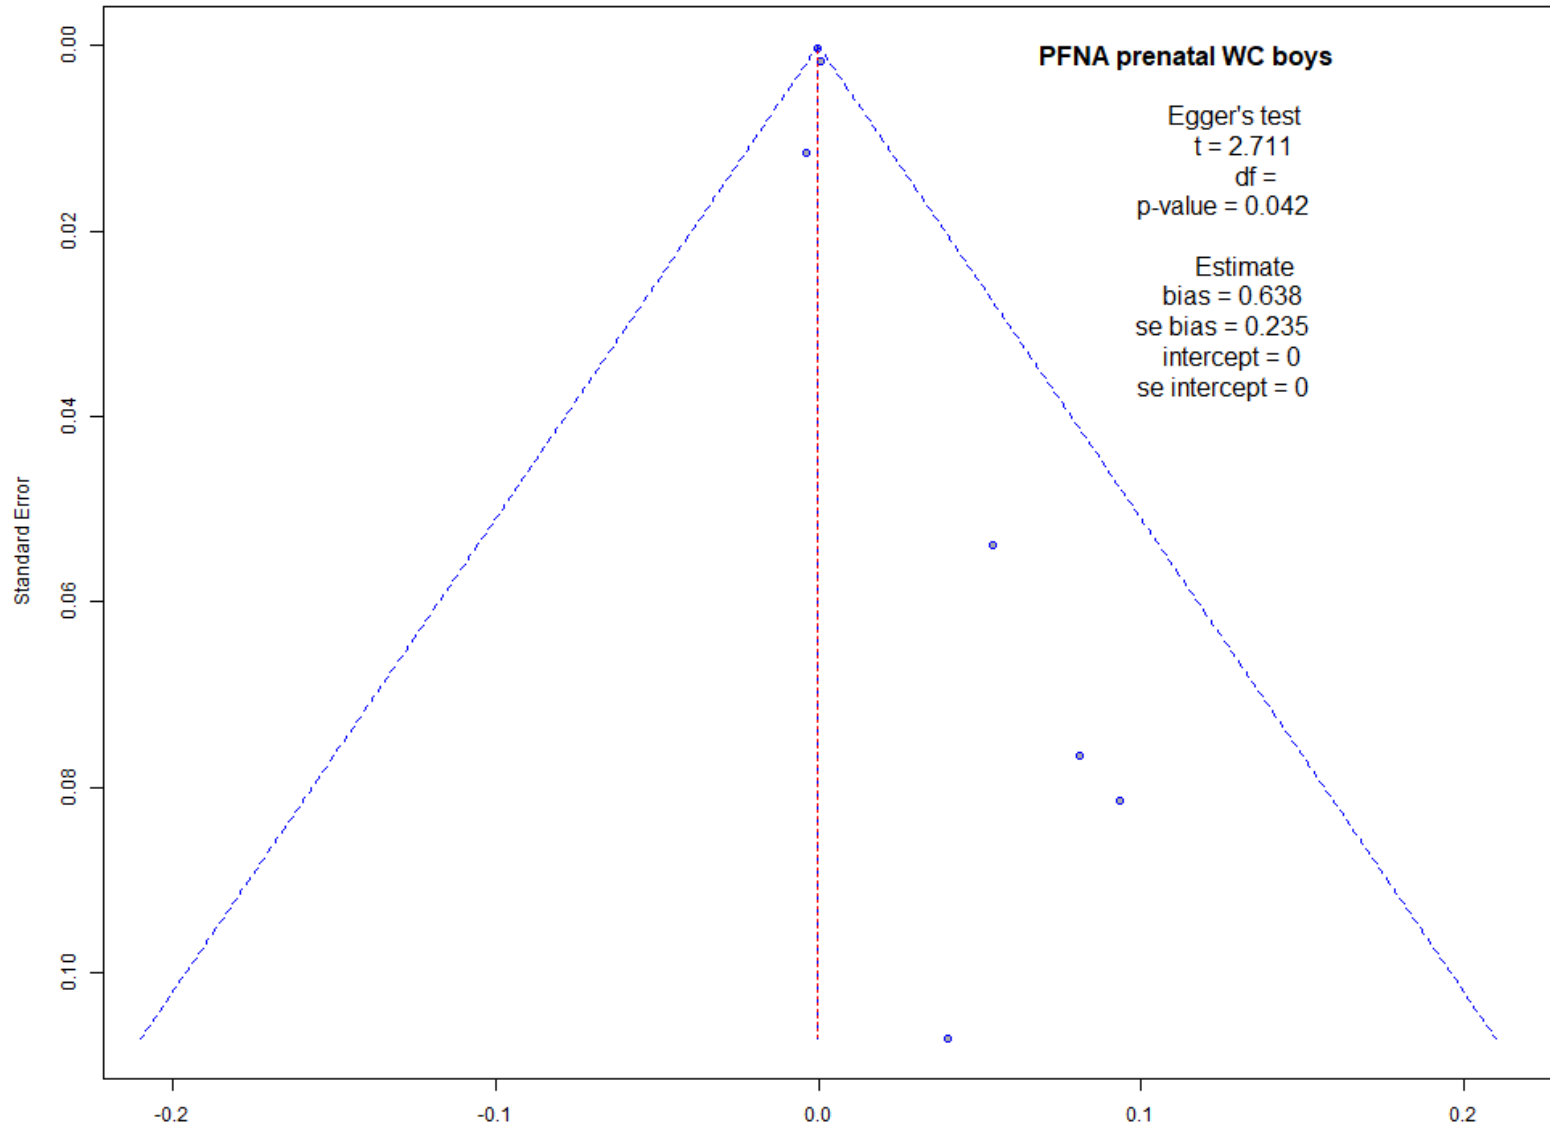

# Prenatal and childhood exposure to per-/polyfluoroalkyl substances (PFASs) and its associations with childhood overweight and/or obesity: a systematic review with meta-analyses

Gianfranco Frigerio, Chiara Matilde Ferrari, and Silvia Fustinoni

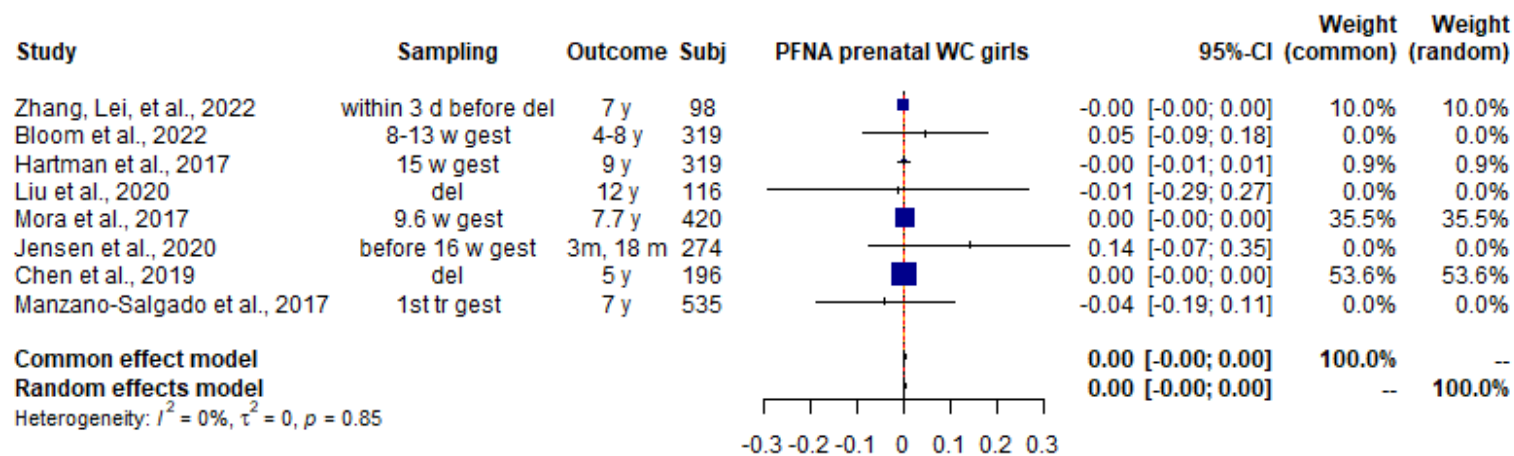

**Prenatal and childhood exposure to per-/polyfluoroalkyl substances (PFASs) and its associations with childhood overweight and/or obesity: a systematic review with meta-analyses**

Gianfranco Frigerio, Chiara Matilde Ferrari, and Silvia Fustinoni

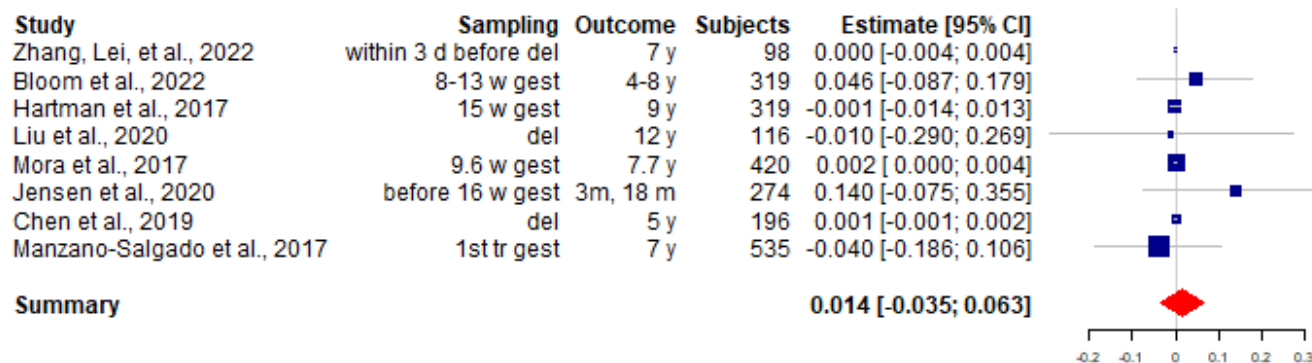



# Prenatal and childhood exposure to per-/polyfluoroalkyl substances (PFASs) and its associations with childhood overweight and/or obesity: a systematic review with meta-analyses

Gianfranco Frigerio, Chiara Matilde Ferrari, and Silvia Fustinoni

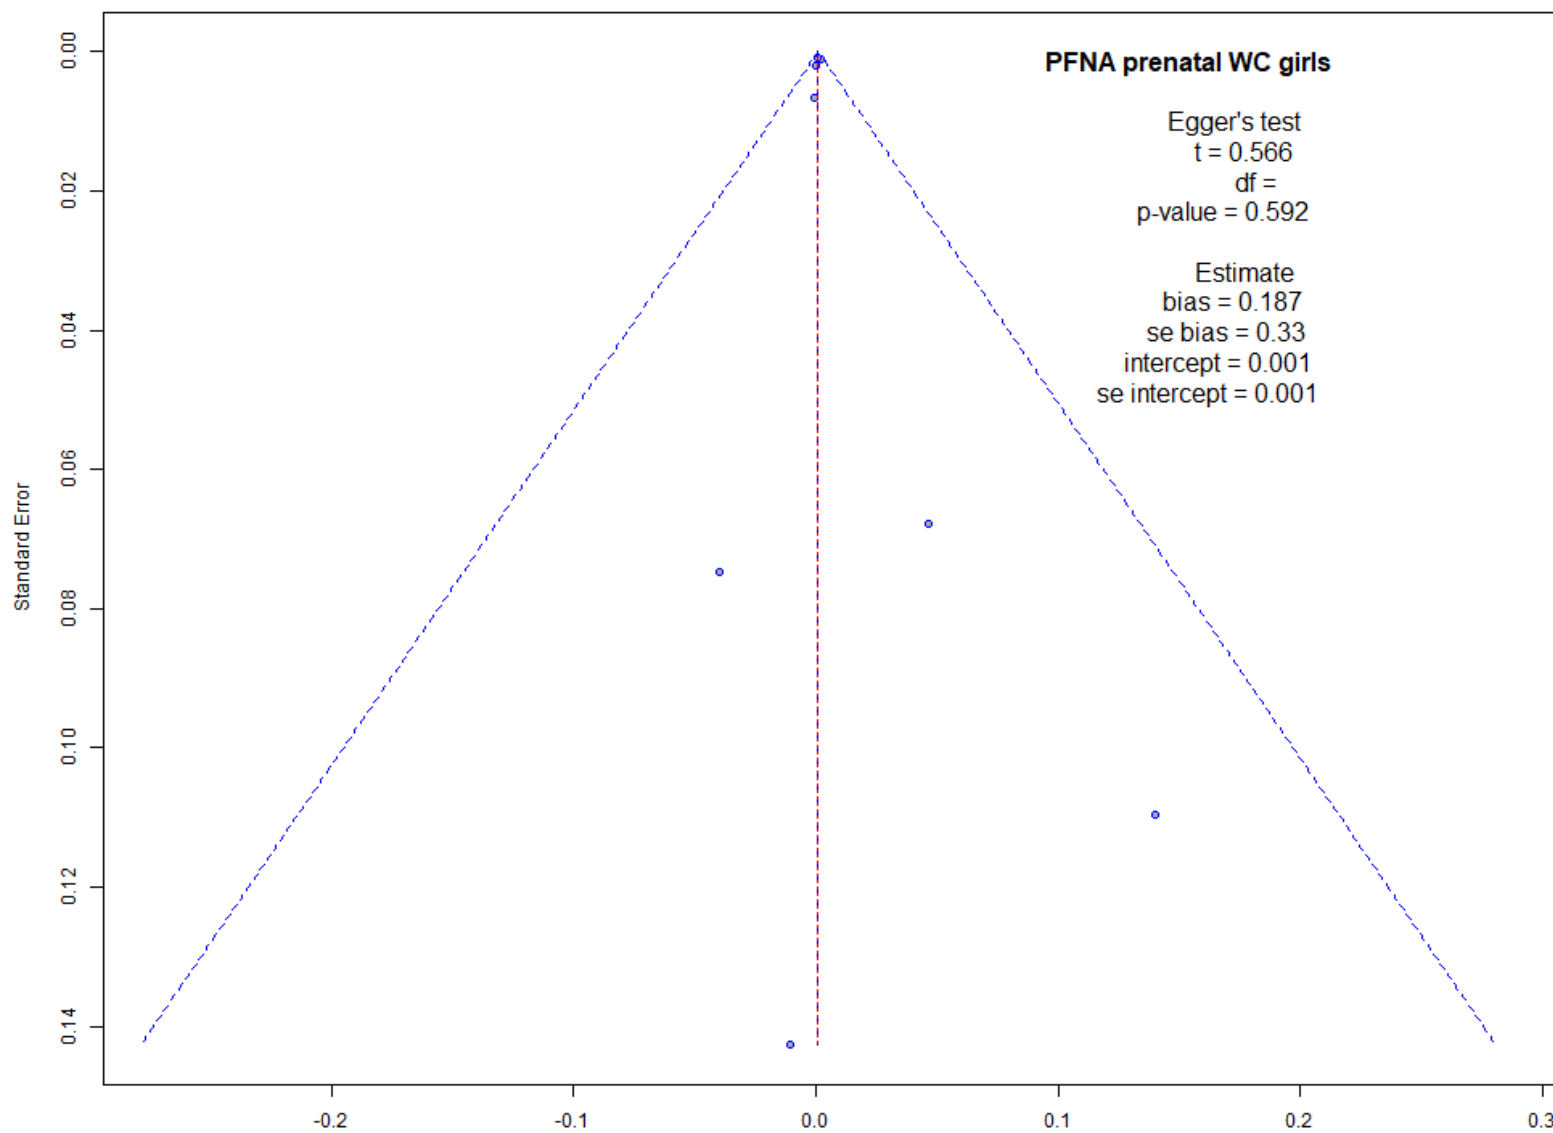

**Prenatal and childhood exposure to per-/polyfluoroalkyl substances (PFASs) and its associations with childhood overweight and/or obesity: a systematic review with meta-analyses**

Gianfranco Frigerio, Chiara Matilde Ferrari, and Silvia Fustinoni

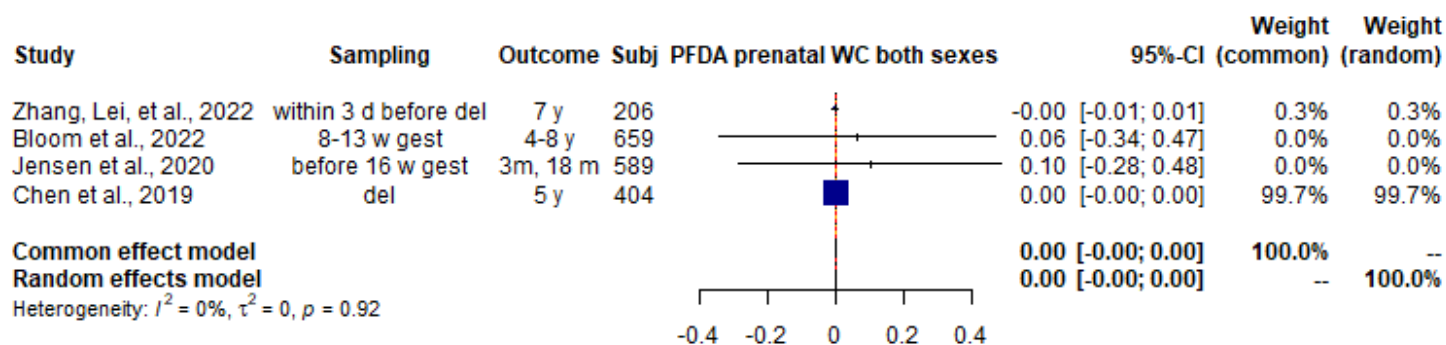

**Prenatal and childhood exposure to per-/polyfluoroalkyl substances (PFASs) and its associations with childhood overweight and/or obesity: a systematic review with meta-analyses**

Gianfranco Frigerio, Chiara Matilde Ferrari, and Silvia Fustinoni

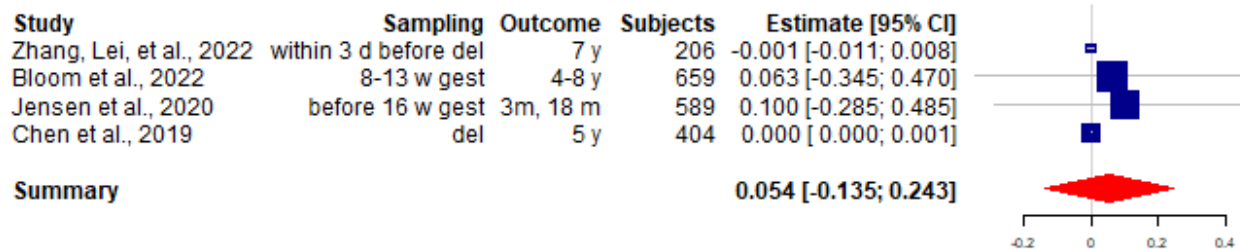

Prenatal and childhood exposure to per-/polyfluoroalkyl substances (PFASs) and its associations with childhood overweight and/or obesity: a systematic review with meta-analyses

Gianfranco Frigerio, Chiara Matilde Ferrari, and Silvia Fustinoni

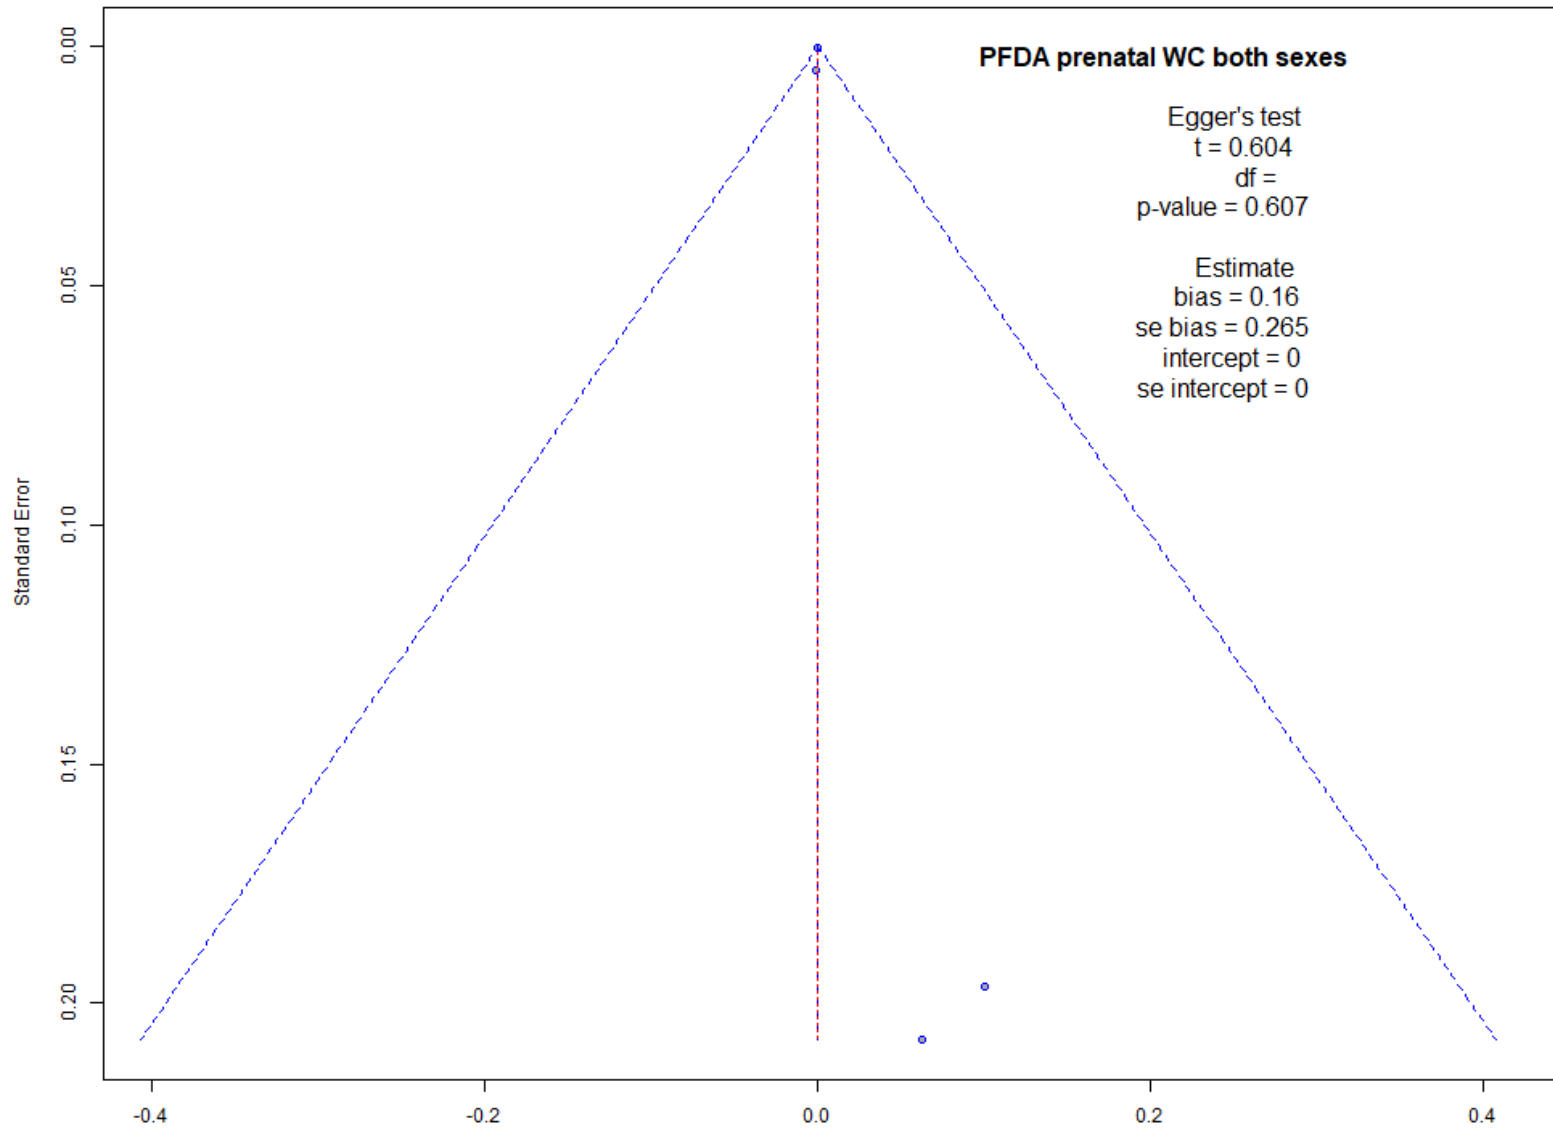

**Prenatal and childhood exposure to per-/polyfluoroalkyl substances (PFASs) and its associations with childhood overweight and/or obesity: a systematic review with meta-analyses**

Gianfranco Frigerio, Chiara Matilde Ferrari, and Silvia Fustinoni

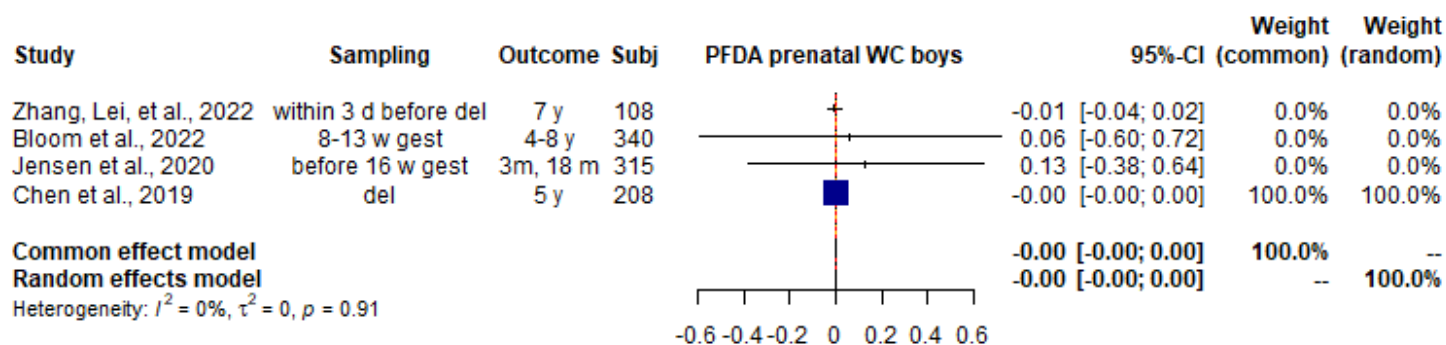

**Prenatal and childhood exposure to per-/polyfluoroalkyl substances (PFASs) and its associations with childhood overweight and/or obesity: a systematic review with meta-analyses**

Gianfranco Frigerio, Chiara Matilde Ferrari, and Silvia Fustinoni

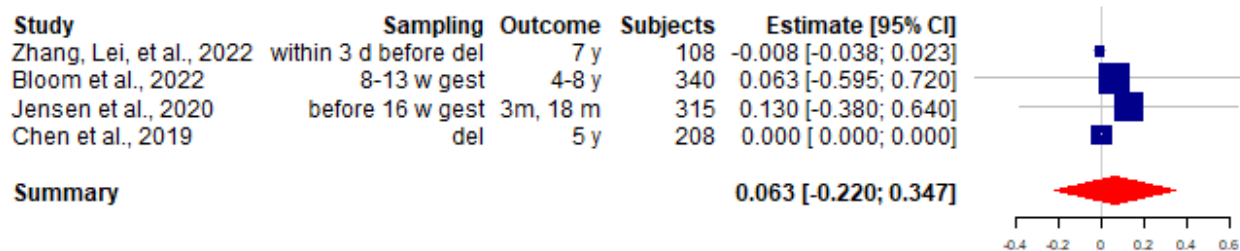

Prenatal and childhood exposure to per-/polyfluoroalkyl substances (PFASs) and its associations with childhood overweight and/or obesity: a systematic review with meta-analyses

Gianfranco Frigerio, Chiara Matilde Ferrari, and Silvia Fustinoni

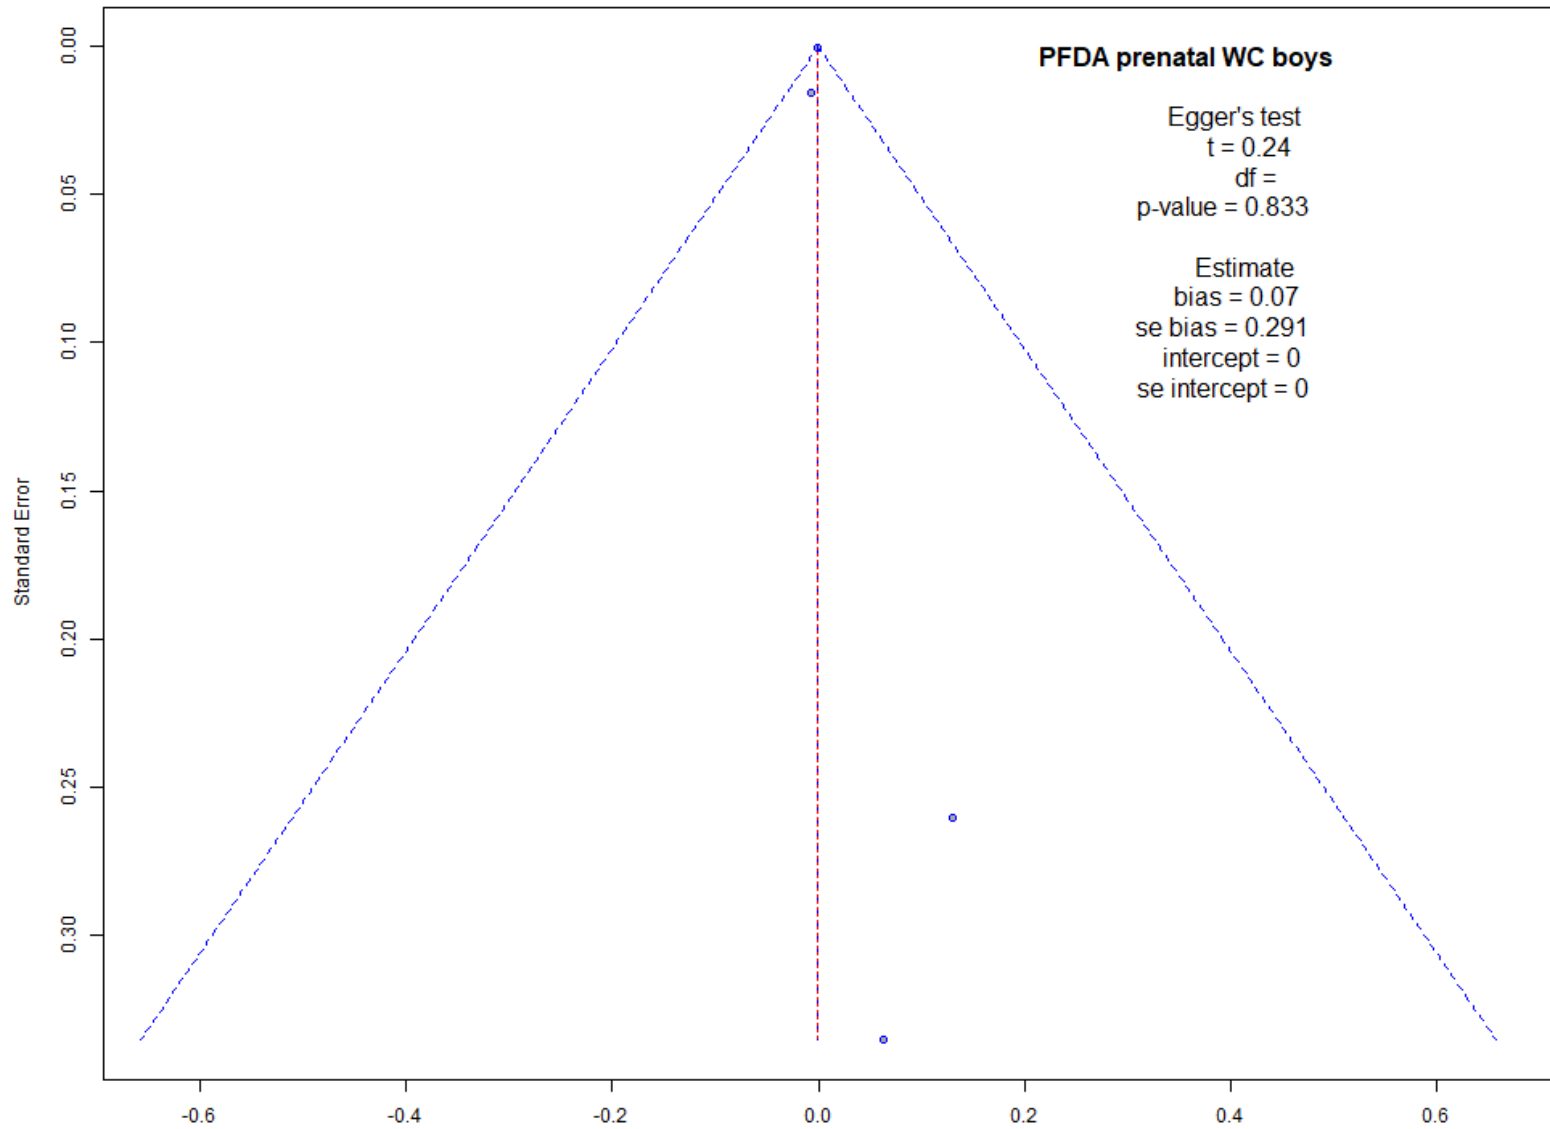

Prenatal and childhood exposure to per-/polyfluoroalkyl substances (PFASs) and its associations with childhood overweight and/or obesity: a systematic review with meta-analyses

Gianfranco Frigerio, Chiara Matilde Ferrari, and Silvia Fustinoni

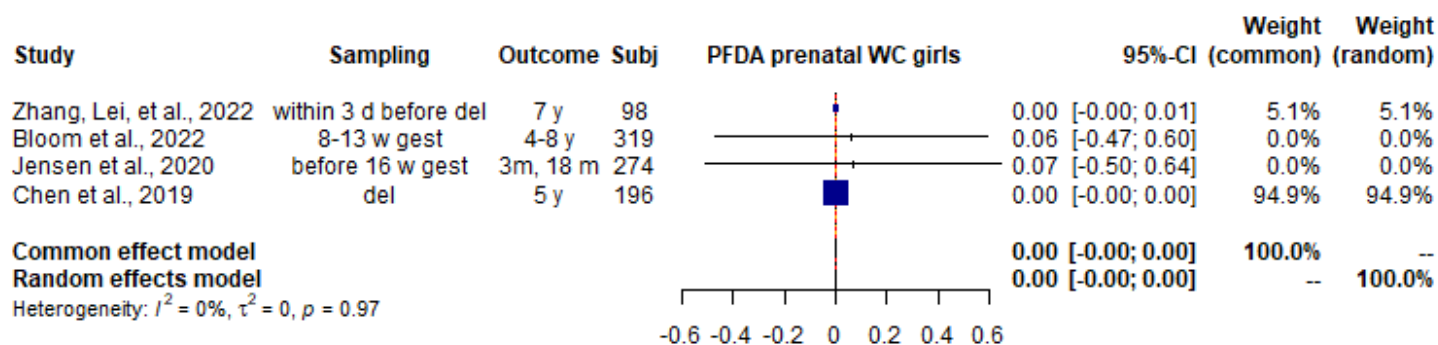



**Prenatal and childhood exposure to per-/polyfluoroalkyl substances (PFASs) and its associations with childhood overweight and/or obesity: a systematic review with meta-analyses**

Gianfranco Frigerio, Chiara Matilde Ferrari, and Silvia Fustinoni

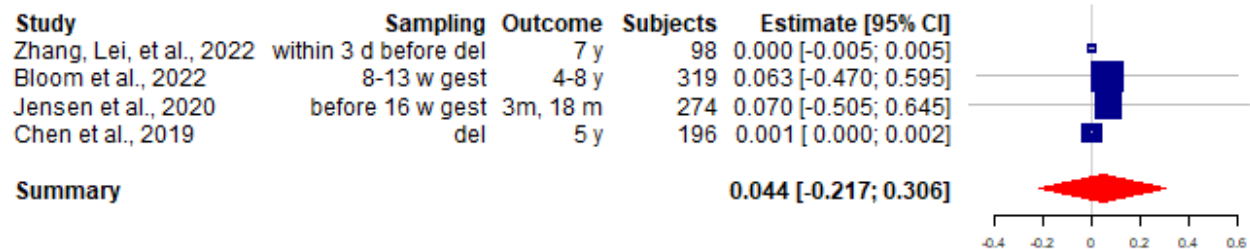

# Prenatal and childhood exposure to per-/polyfluoroalkyl substances (PFASs) and its associations with childhood overweight and/or obesity: a systematic review with meta-analyses

Gianfranco Frigerio, Chiara Matilde Ferrari, and Silvia Fustinoni

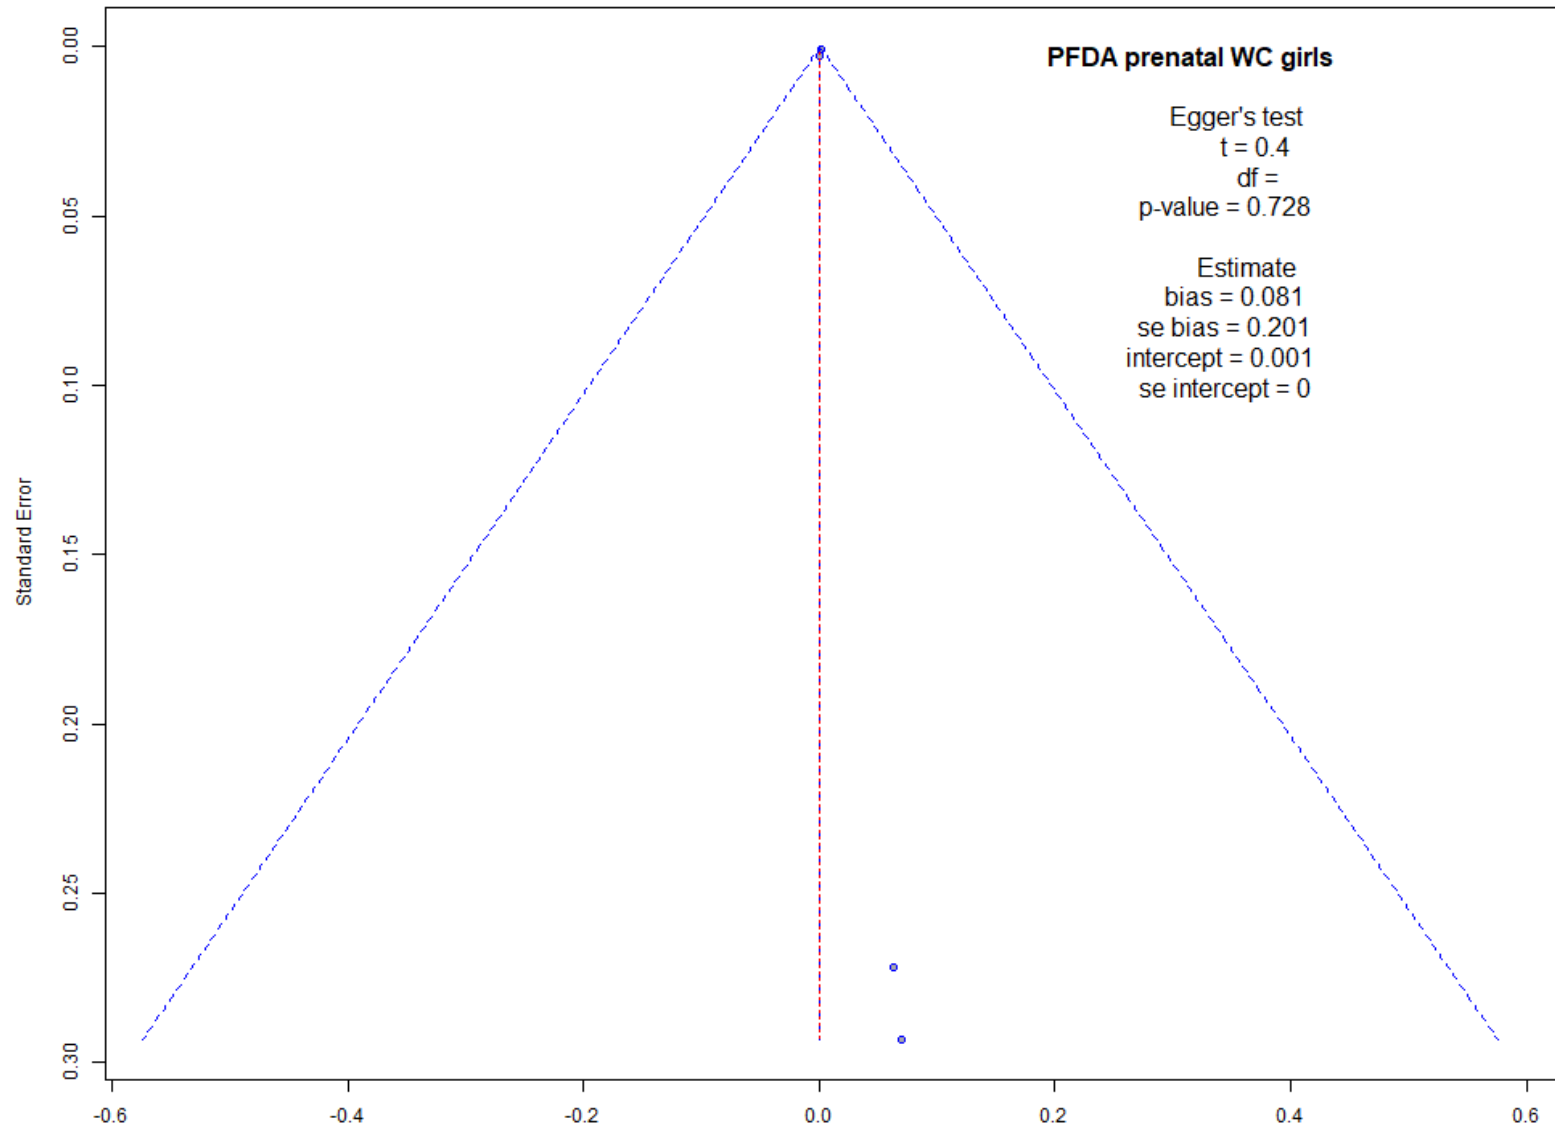

Prenatal and childhood exposure to per-/polyfluoroalkyl substances (PFASs) and its associations with childhood overweight and/or obesity: a systematic review with meta-analyses

Gianfranco Frigerio, Chiara Matilde Ferrari, and Silvia Fustinoni

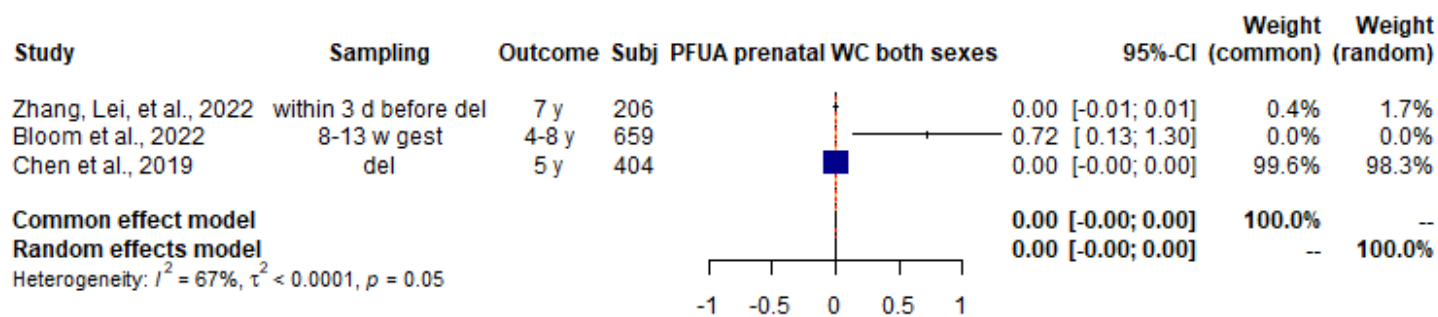

# Prenatal and childhood exposure to per-/polyfluoroalkyl substances (PFASs) and its associations with childhood overweight and/or obesity: a systematic review with meta-analyses

Gianfranco Frigerio, Chiara Matilde Ferrari, and Silvia Fustinoni

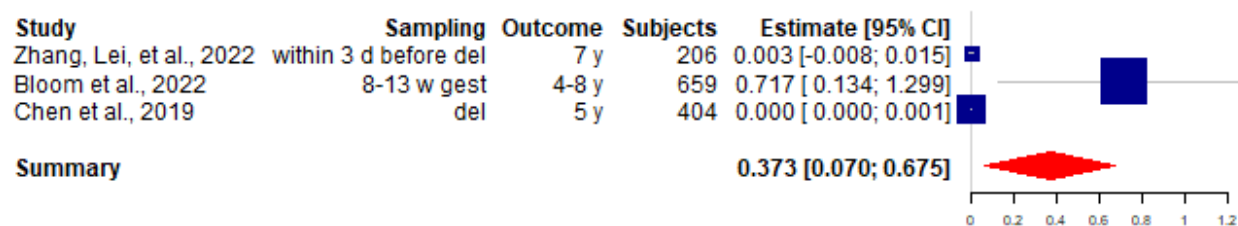

Prenatal and childhood exposure to per-/polyfluoroalkyl substances (PFASs) and its associations with childhood overweight and/or obesity: a systematic review with meta-analyses

Gianfranco Frigerio, Chiara Matilde Ferrari, and Silvia Fustinoni

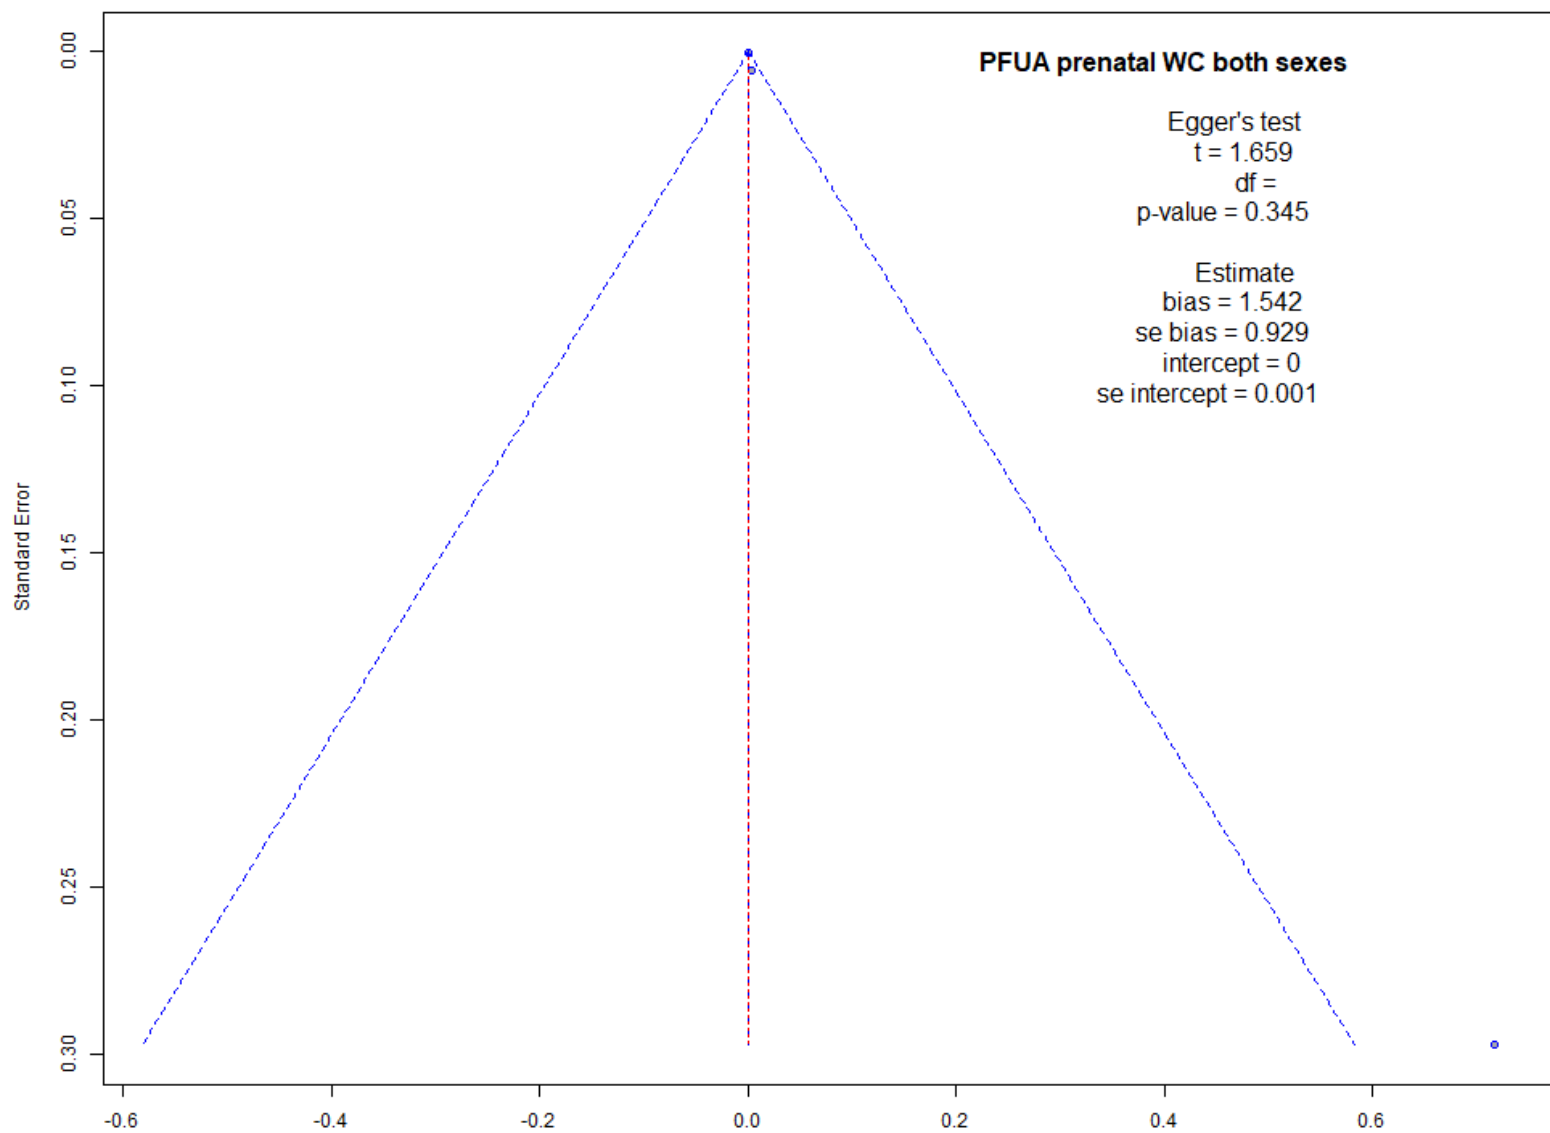

**Prenatal and childhood exposure to per-/polyfluoroalkyl substances (PFASs) and its associations with childhood overweight and/or obesity: a systematic review with meta-analyses**

Gianfranco Frigerio, Chiara Matilde Ferrari, and Silvia Fustinoni

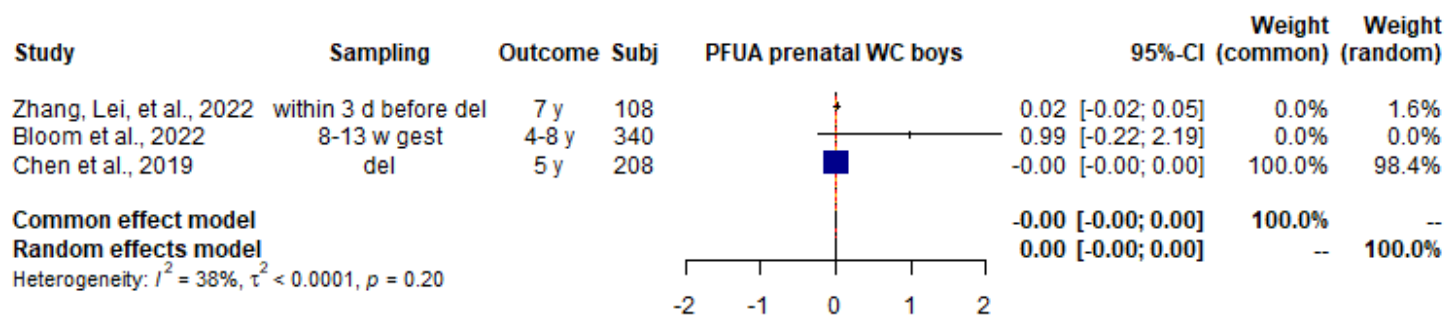

# Prenatal and childhood exposure to per-/polyfluoroalkyl substances (PFASs) and its associations with childhood overweight and/or obesity: a systematic review with meta-analyses

Gianfranco Frigerio, Chiara Matilde Ferrari, and Silvia Fustinoni

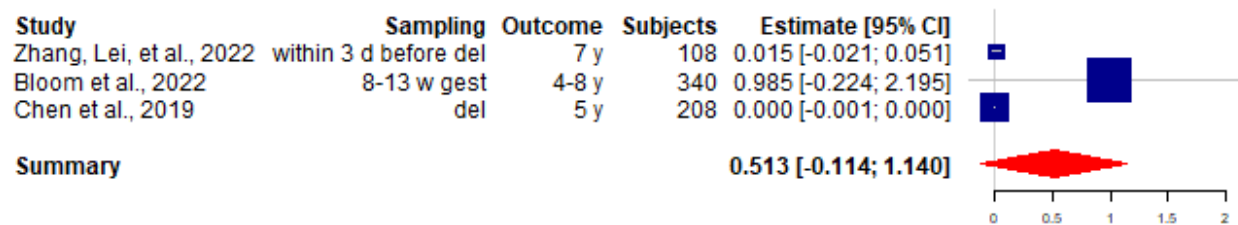

Prenatal and childhood exposure to per-/polyfluoroalkyl substances (PFASs) and its associations with childhood overweight and/or obesity: a systematic review with meta-analyses

Gianfranco Frigerio, Chiara Matilde Ferrari, and Silvia Fustinoni

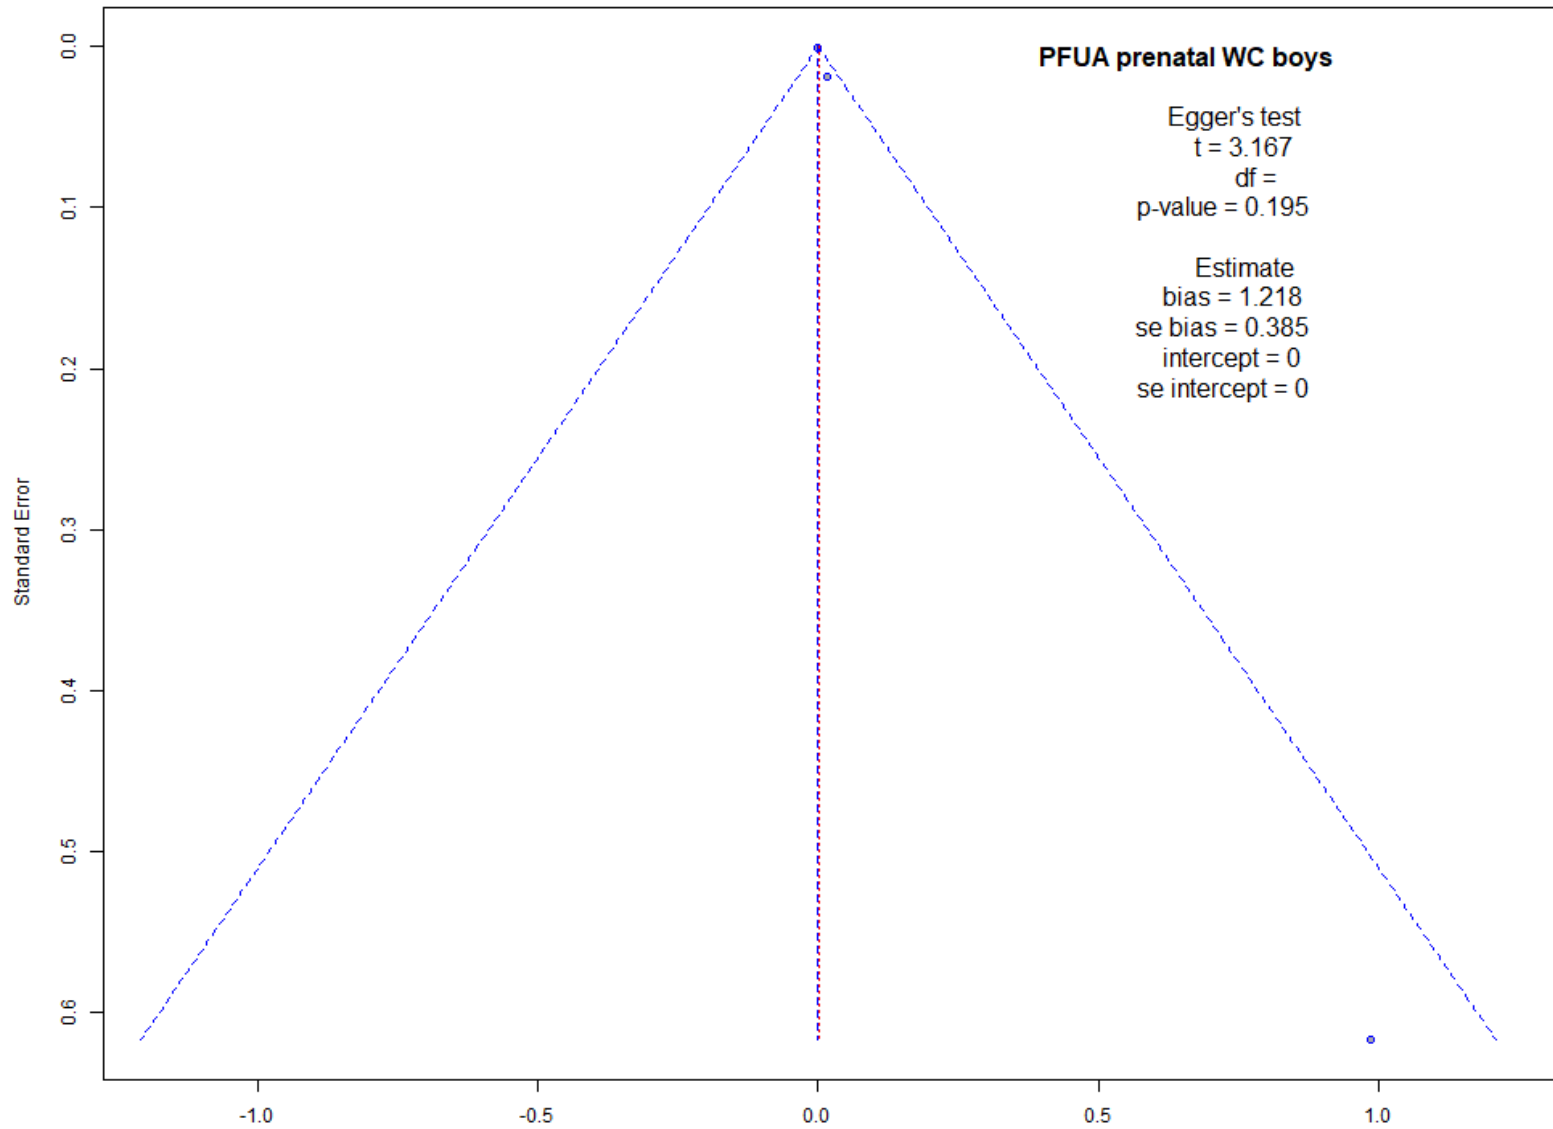



**Prenatal and childhood exposure to per-/polyfluoroalkyl substances (PFASs) and its associations with childhood overweight and/or obesity: a systematic review with meta-analyses**

Gianfranco Frigerio, Chiara Matilde Ferrari, and Silvia Fustinoni

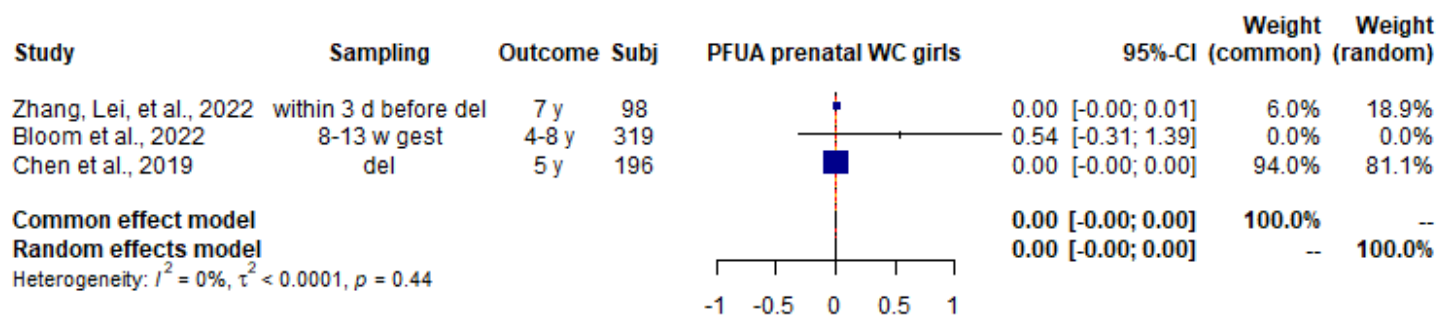

# Prenatal and childhood exposure to per-/polyfluoroalkyl substances (PFASs) and its associations with childhood overweight and/or obesity: a systematic review with meta-analyses

Gianfranco Frigerio, Chiara Matilde Ferrari, and Silvia Fustinoni

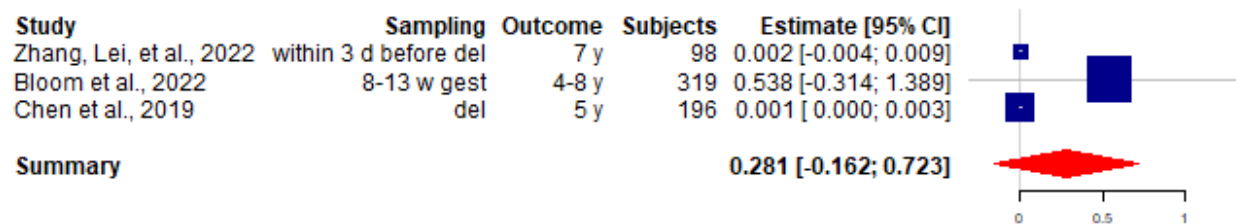

Prenatal and childhood exposure to per-/polyfluoroalkyl substances (PFASs) and its associations with childhood overweight and/or obesity: a systematic review with meta-analyses

Gianfranco Frigerio, Chiara Matilde Ferrari, and Silvia Fustinoni

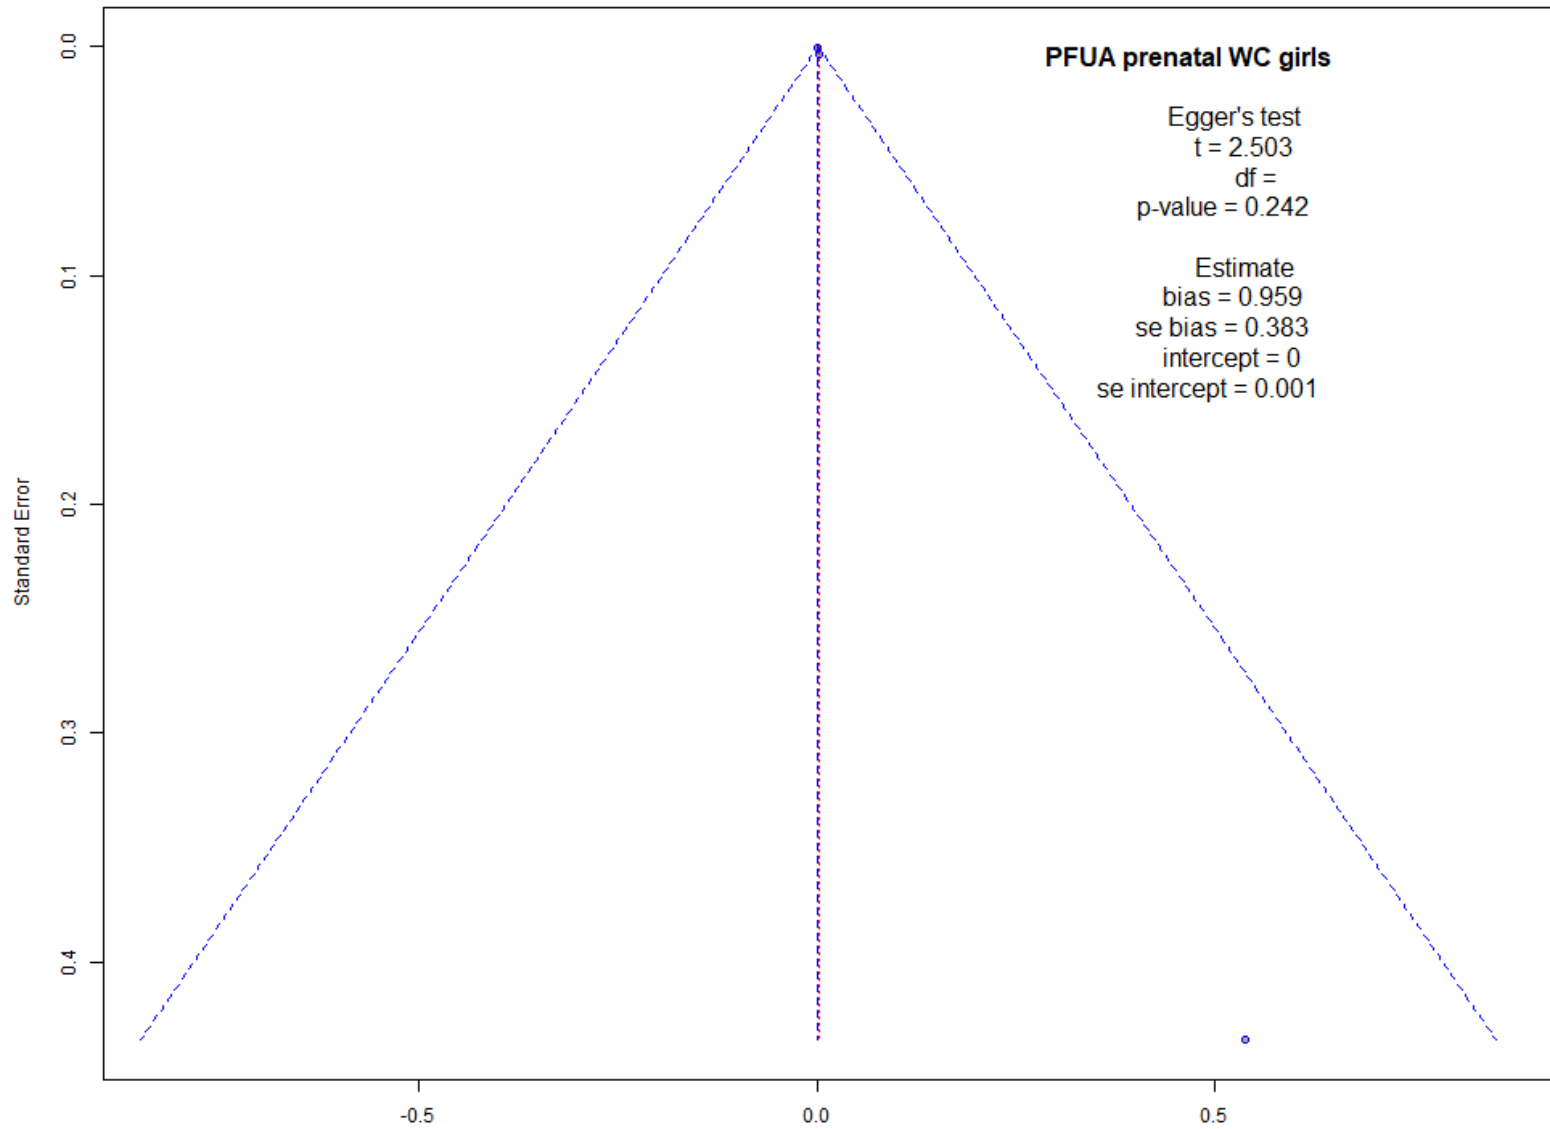

# Prenatal and childhood exposure to per-/polyfluoroalkyl substances (PFASs) and its associations with childhood overweight and/or obesity: a systematic review with meta-analyses

Gianfranco Frigerio, Chiara Matilde Ferrari, and Silvia Fustinoni

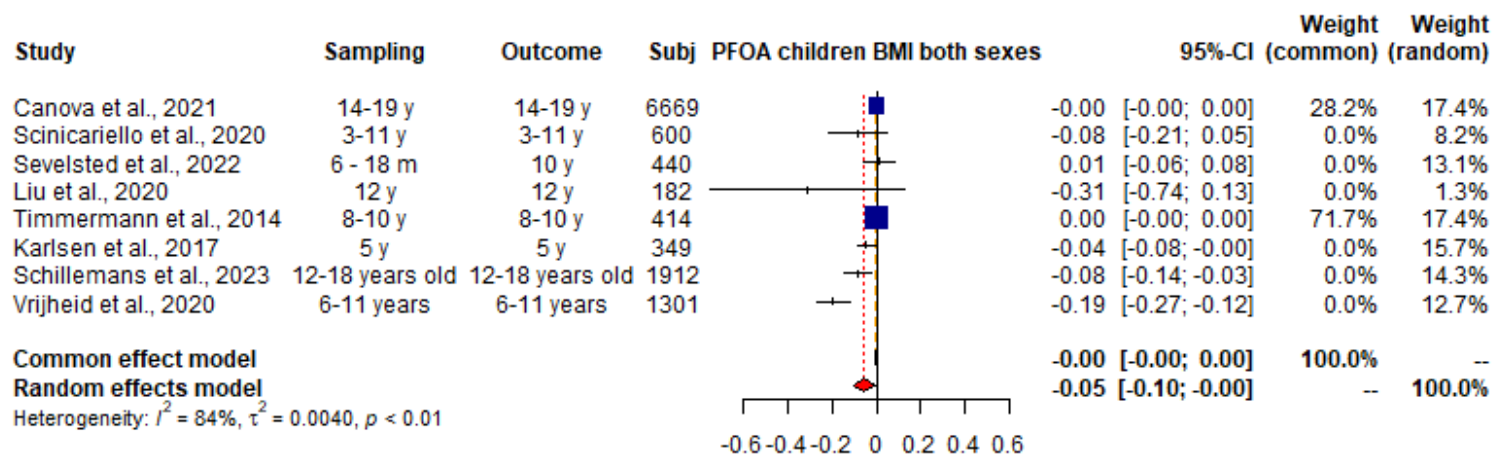

# Prenatal and childhood exposure to per-/polyfluoroalkyl substances (PFASs) and its associations with childhood overweight and/or obesity: a systematic review with meta-analyses

Gianfranco Frigerio, Chiara Matilde Ferrari, and Silvia Fustinoni

| Study                      | Sampling        | Outcome         | Subjects | Estimate [95% CI]              |
|----------------------------|-----------------|-----------------|----------|--------------------------------|
| Canova et al., 2021        | 14-19 y         | 14-19 y         | 6669     | -0.001 [-0.001; 0.000]         |
| Scinicariello et al., 2020 | 3-11 y          | 3-11 y          | 600      | -0.080 [-0.210; 0.050]         |
| Sevelsted et al., 2022     | 6 - 18 m        | 10 y            | 440      | 0.010 [-0.060; 0.080]          |
| Liu et al., 2020           | 12 y            | 12 y            | 182      | -0.306 [-0.741; 0.129]         |
| Timmermann et al., 2014    | 8-10 y          | 8-10 y          | 414      | 0.000 [0.000; 0.001]           |
| Karlsen et al., 2017       | 5 y             | 5 y             | 349      | -0.044 [-0.085; -0.003]        |
| Schillemans et al., 2023   | 12-18 years old | 12-18 years old | 1912     | -0.083 [-0.141; -0.026]        |
| Vrijheid et al., 2020      | 6-11 years      | 6-11 years      | 1301     | -0.193 [-0.267; -0.118]        |
| <b>Summary</b>             |                 |                 |          | <b>-0.045 [-0.060; -0.029]</b> |

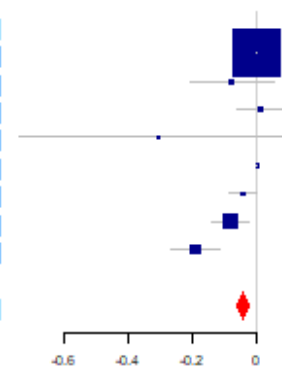

Prenatal and childhood exposure to per-/polyfluoroalkyl substances (PFASs) and its associations with childhood overweight and/or obesity: a systematic review with meta-analyses

Gianfranco Frigerio, Chiara Matilde Ferrari, and Silvia Fustinoni

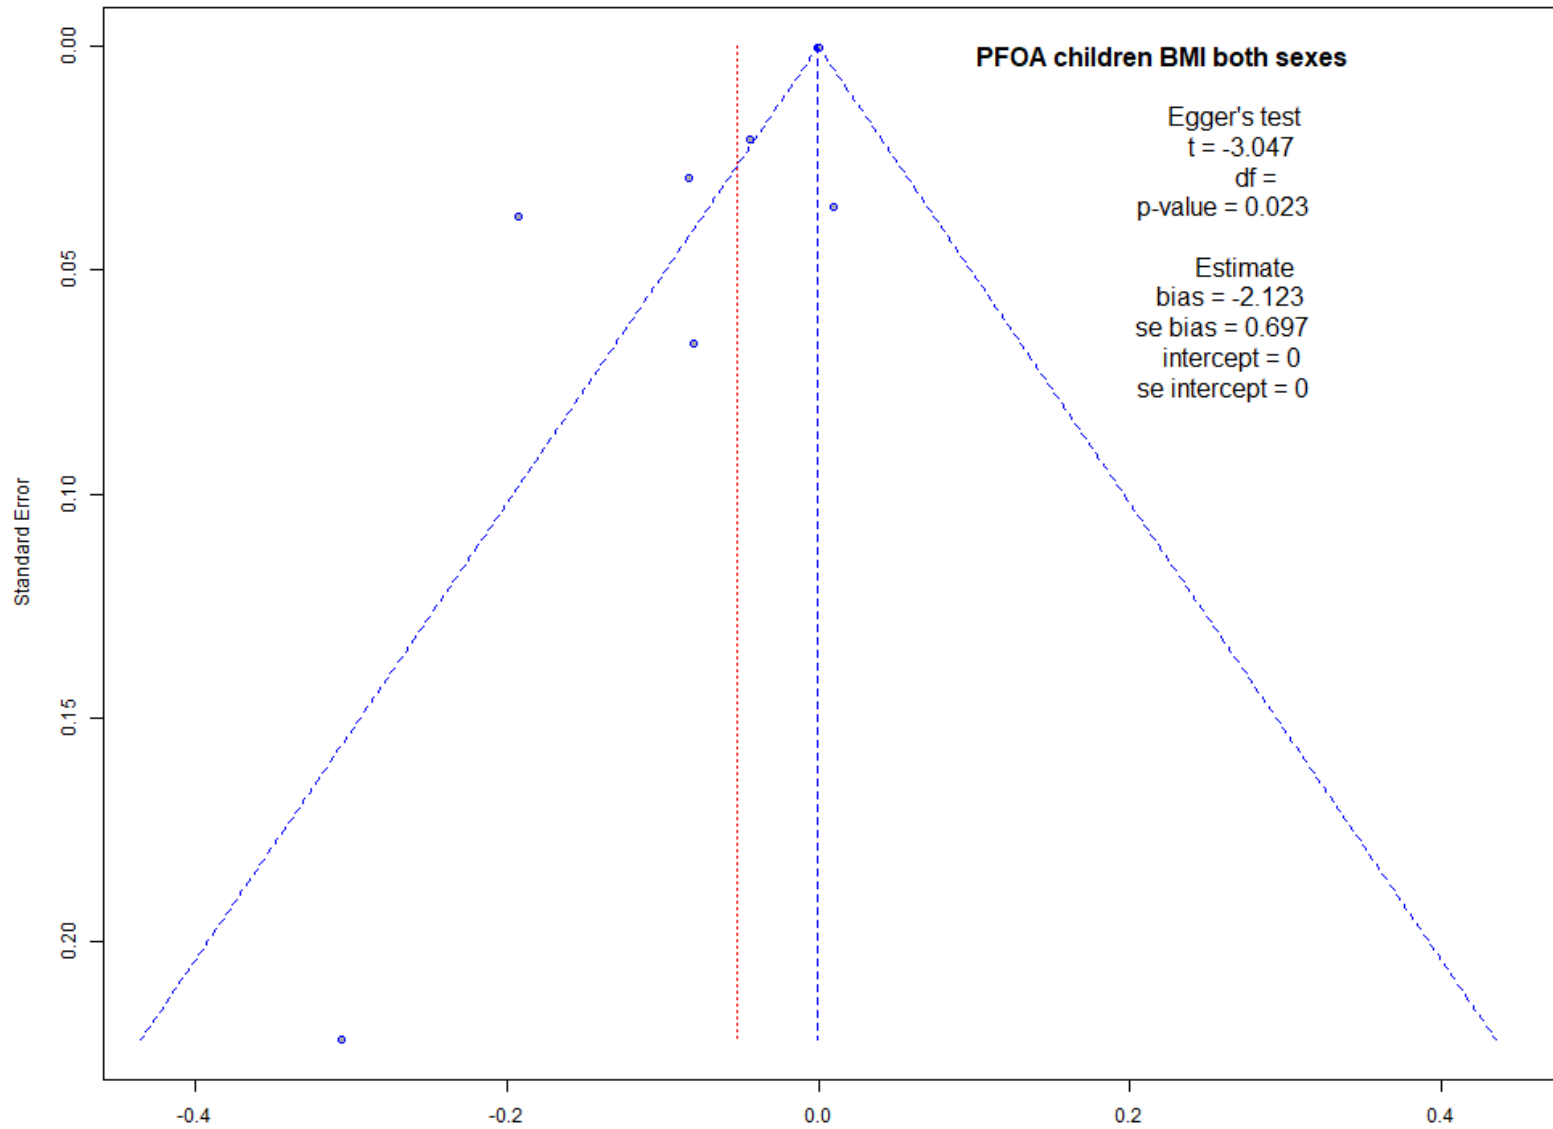

**Prenatal and childhood exposure to per-/polyfluoroalkyl substances (PFASs) and its associations with childhood overweight and/or obesity: a systematic review with meta-analyses**

Gianfranco Frigerio, Chiara Matilde Ferrari, and Silvia Fustinoni

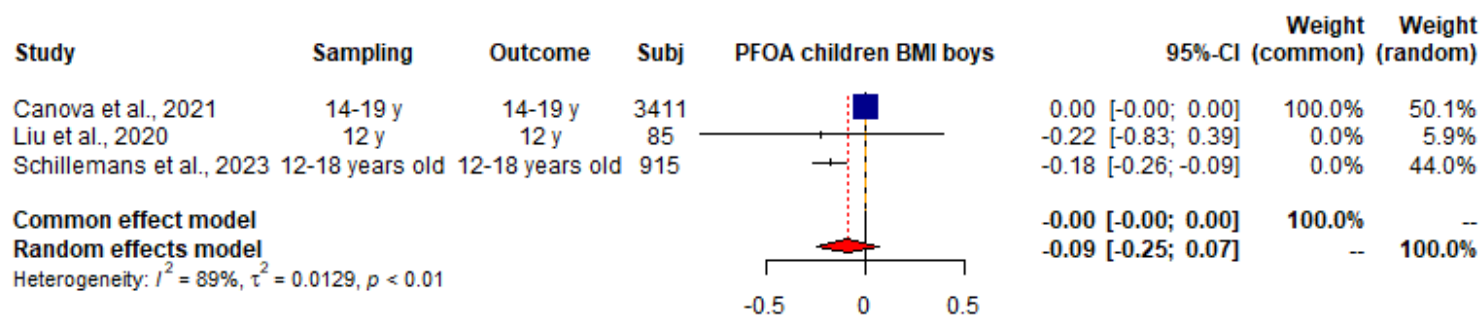

# Prenatal and childhood exposure to per-/polyfluoroalkyl substances (PFASs) and its associations with childhood overweight and/or obesity: a systematic review with meta-analyses

Gianfranco Frigerio, Chiara Matilde Ferrari, and Silvia Fustinoni

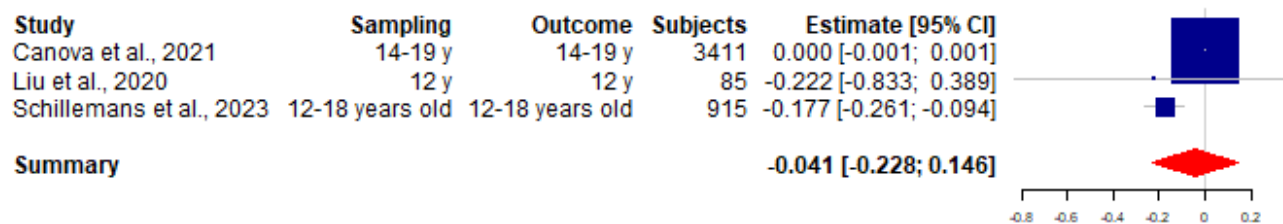



Prenatal and childhood exposure to per-/polyfluoroalkyl substances (PFASs) and its associations with childhood overweight and/or obesity: a systematic review with meta-analyses

Gianfranco Frigerio, Chiara Matilde Ferrari, and Silvia Fustinoni

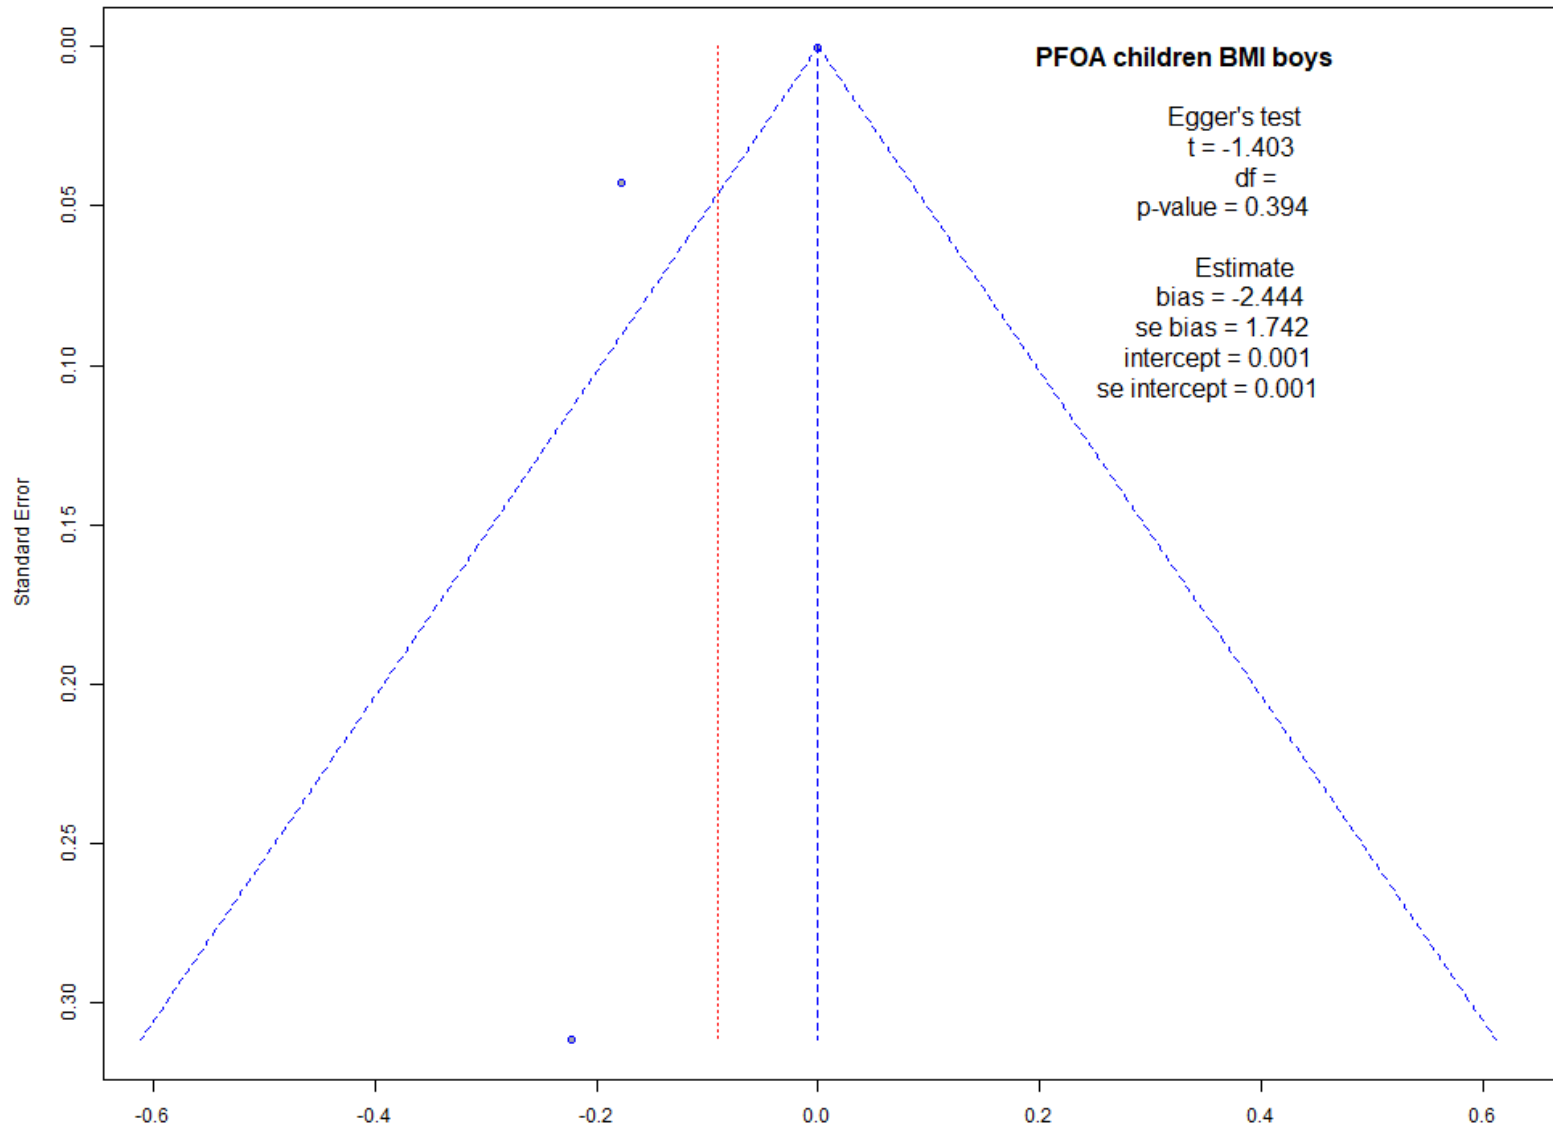

**Prenatal and childhood exposure to per-/polyfluoroalkyl substances (PFASs) and its associations with childhood overweight and/or obesity: a systematic review with meta-analyses**

Gianfranco Frigerio, Chiara Matilde Ferrari, and Silvia Fustinoni

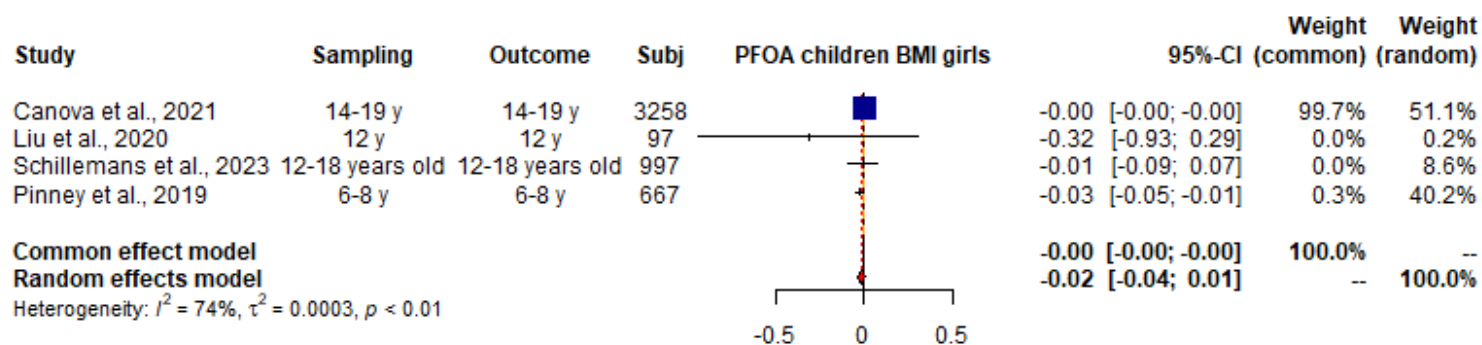

**Prenatal and childhood exposure to per-/polyfluoroalkyl substances (PFASs) and its associations with childhood overweight and/or obesity: a systematic review with meta-analyses**

Gianfranco Frigerio, Chiara Matilde Ferrari, and Silvia Fustinoni

| Study                    | Sampling        | Outcome         | Subjects | Estimate [95% CI]             |
|--------------------------|-----------------|-----------------|----------|-------------------------------|
| Canova et al., 2021      | 14-19 y         | 14-19 y         | 3258     | -0.002 [-0.003; -0.001]       |
| Liu et al., 2020         | 12 y            | 12 y            | 97       | -0.316 [-0.926; 0.295]        |
| Schillemans et al., 2023 | 12-18 years old | 12-18 years old | 997      | -0.010 [-0.089; 0.068]        |
| Pinney et al., 2019      | 6-8 y           | 6-8 y           | 667      | -0.032 [-0.050; -0.013]       |
| <b>Summary</b>           |                 |                 |          | <b>-0.013 [-0.046; 0.019]</b> |

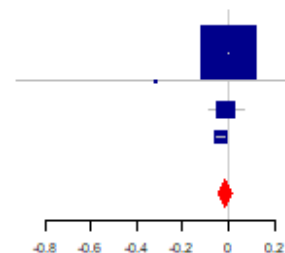

Prenatal and childhood exposure to per-/polyfluoroalkyl substances (PFASs) and its associations with childhood overweight and/or obesity: a systematic review with meta-analyses

Gianfranco Frigerio, Chiara Matilde Ferrari, and Silvia Fustinoni

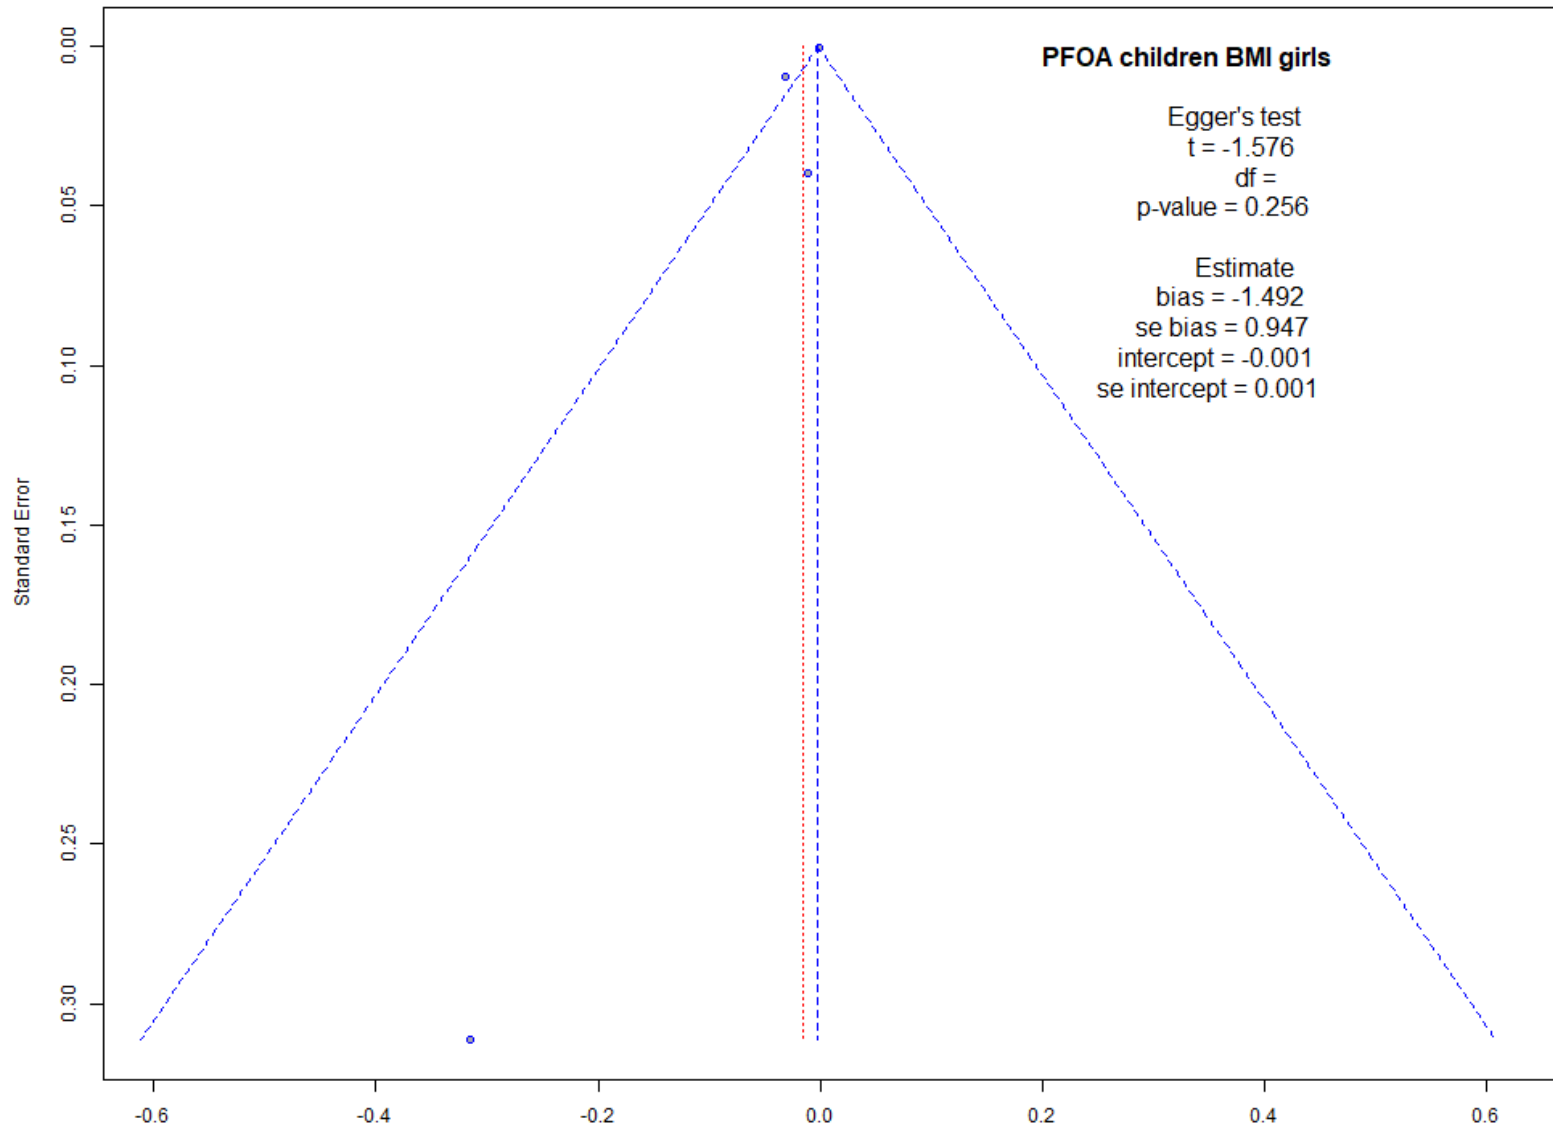

Prenatal and childhood exposure to per-/polyfluoroalkyl substances (PFASs) and its associations with childhood overweight and/or obesity: a systematic review with meta-analyses

Gianfranco Frigerio, Chiara Matilde Ferrari, and Silvia Fustinoni

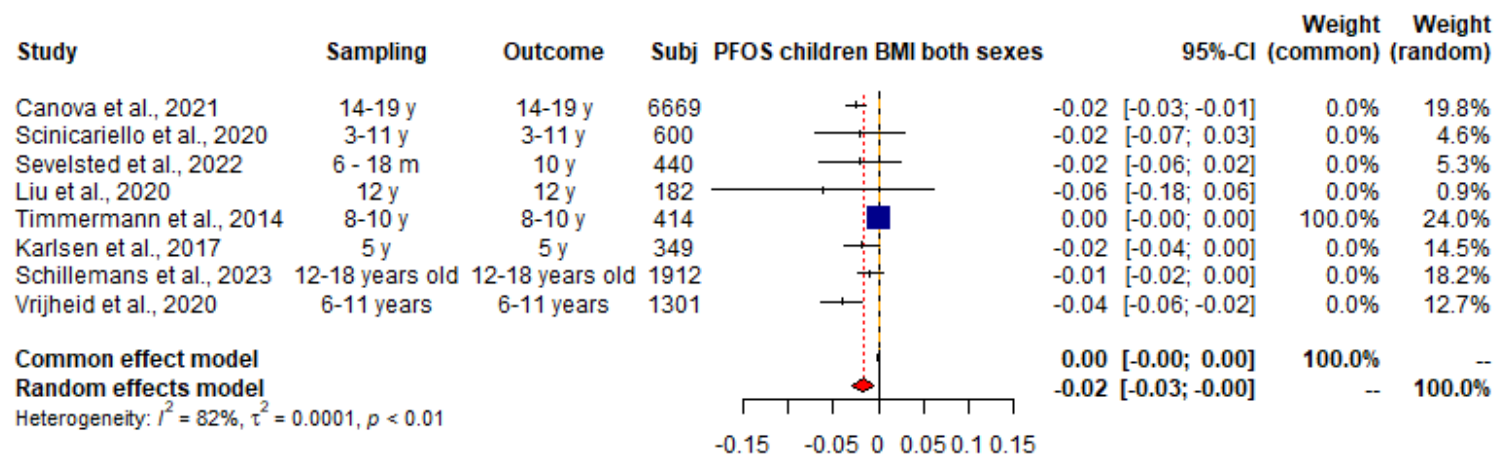

# Prenatal and childhood exposure to per-/polyfluoroalkyl substances (PFASs) and its associations with childhood overweight and/or obesity: a systematic review with meta-analyses

Gianfranco Frigerio, Chiara Matilde Ferrari, and Silvia Fustinoni

| Study                      | Sampling        | Outcome         | Subjects | Estimate [95% CI]              |
|----------------------------|-----------------|-----------------|----------|--------------------------------|
| Canova et al., 2021        | 14-19 y         | 14-19 y         | 6669     | -0.024 [-0.035; -0.013]        |
| Scinicariello et al., 2020 | 3-11 y          | 3-11 y          | 600      | -0.021 [-0.070; 0.029]         |
| Sevelsted et al., 2022     | 6 - 18 m        | 10 y            | 440      | -0.020 [-0.065; 0.025]         |
| Liu et al., 2020           | 12 y            | 12 y            | 182      | -0.061 [-0.183; 0.061]         |
| Timmermann et al., 2014    | 8-10 y          | 8-10 y          | 414      | 0.000 [0.000; 0.000]           |
| Karlsen et al., 2017       | 5 y             | 5 y             | 349      | -0.018 [-0.037; 0.002]         |
| Schillemans et al., 2023   | 12-18 years old | 12-18 years old | 1912     | -0.009 [-0.022; 0.004]         |
| Vrijheid et al., 2020      | 6-11 years      | 6-11 years      | 1301     | -0.040 [-0.063; -0.018]        |
| <b>Summary</b>             |                 |                 |          | <b>-0.023 [-0.041; -0.004]</b> |

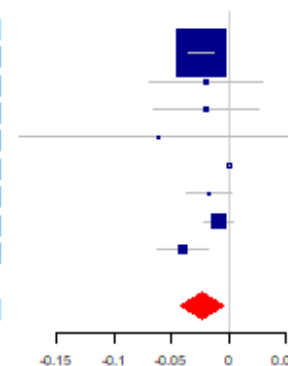

Prenatal and childhood exposure to per-/polyfluoroalkyl substances (PFASs) and its associations with childhood overweight and/or obesity: a systematic review with meta-analyses

Gianfranco Frigerio, Chiara Matilde Ferrari, and Silvia Fustinoni

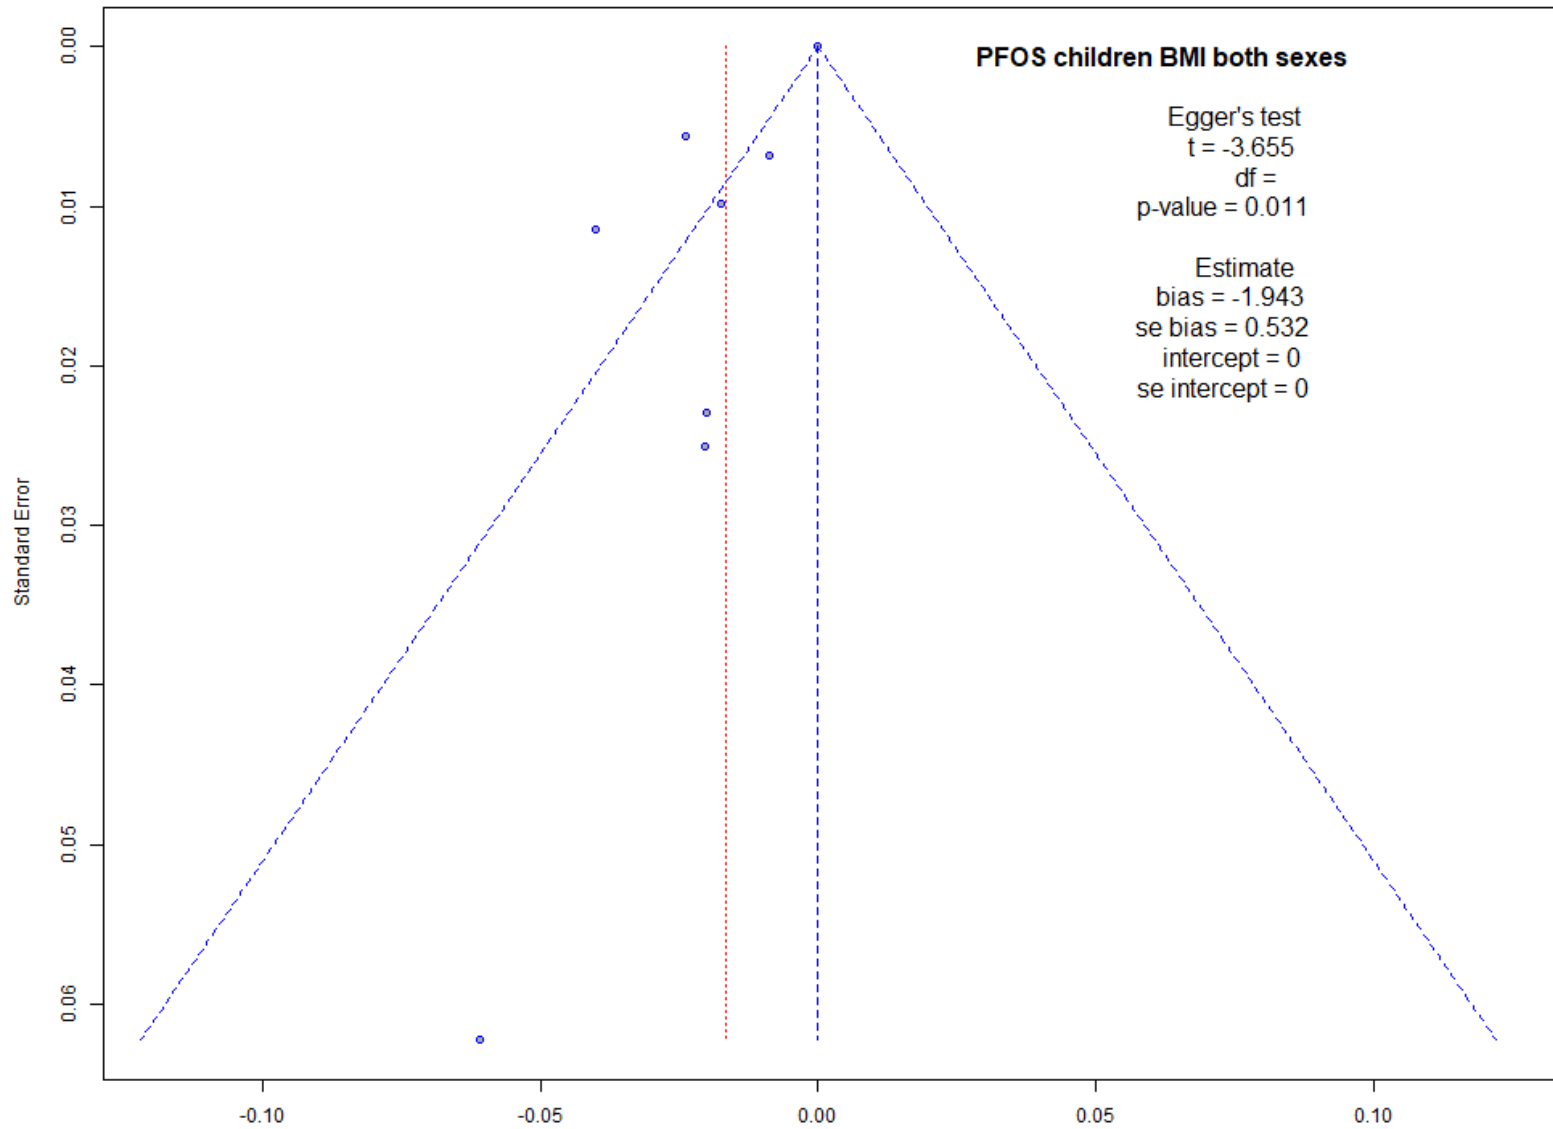

**Prenatal and childhood exposure to per-/polyfluoroalkyl substances (PFASs) and its associations with childhood overweight and/or obesity: a systematic review with meta-analyses**

Gianfranco Frigerio, Chiara Matilde Ferrari, and Silvia Fustinoni

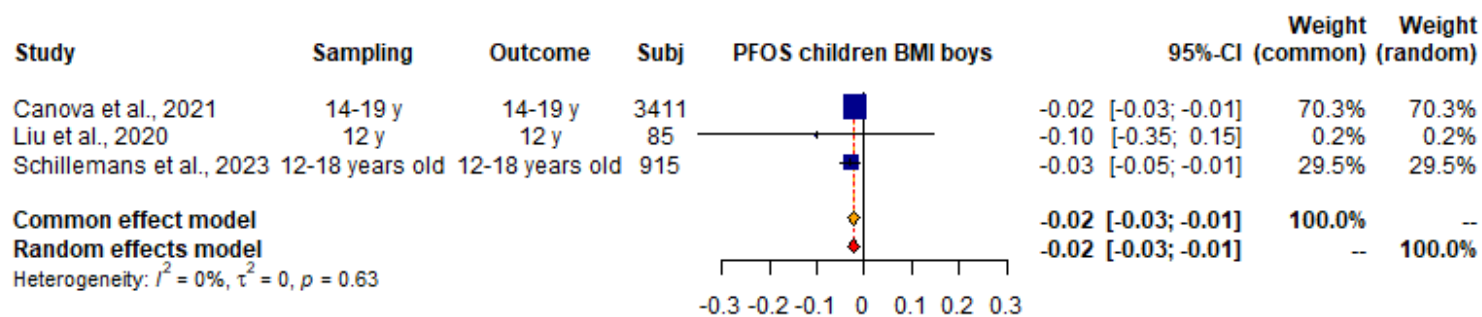



**Prenatal and childhood exposure to per-/polyfluoroalkyl substances (PFASs) and its associations with childhood overweight and/or obesity: a systematic review with meta-analyses**

Gianfranco Frigerio, Chiara Matilde Ferrari, and Silvia Fustinoni

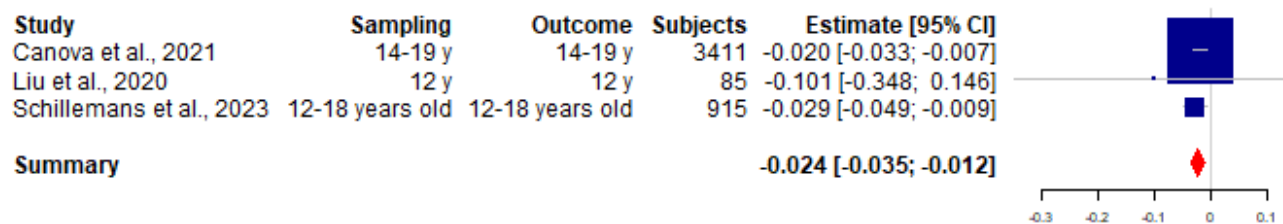

Prenatal and childhood exposure to per-/polyfluoroalkyl substances (PFASs) and its associations with childhood overweight and/or obesity: a systematic review with meta-analyses

Gianfranco Frigerio, Chiara Matilde Ferrari, and Silvia Fustinoni

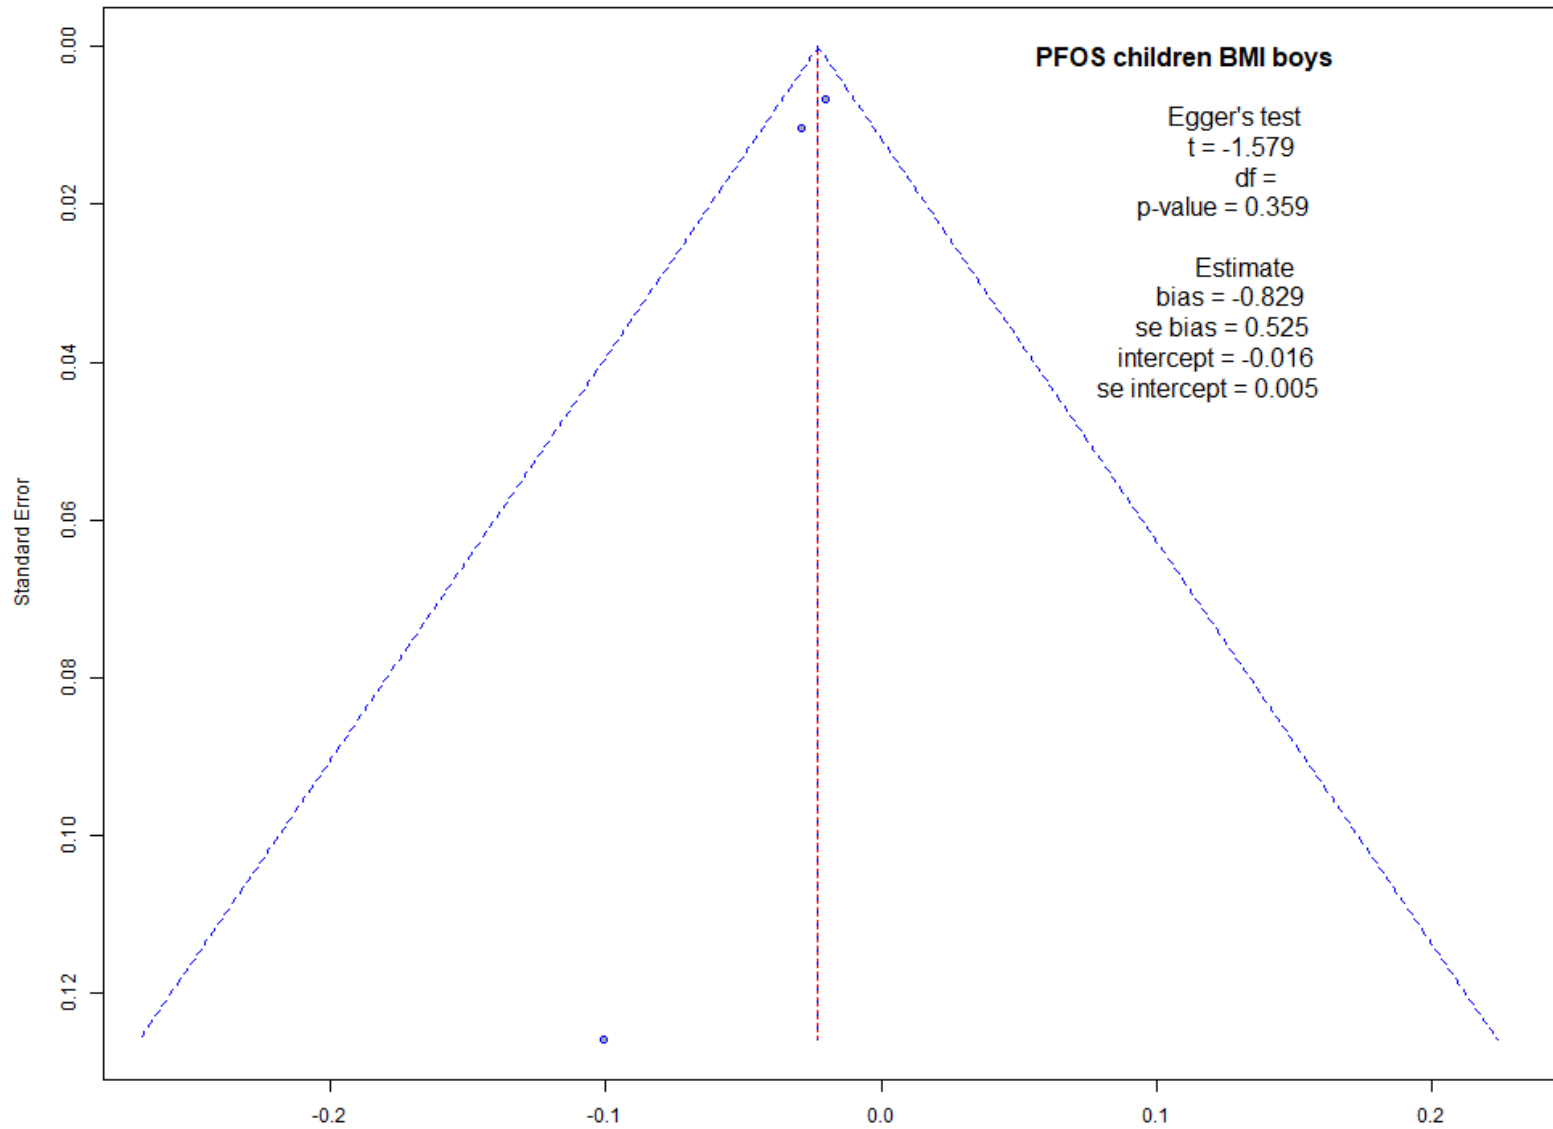

**Prenatal and childhood exposure to per-/polyfluoroalkyl substances (PFASs) and its associations with childhood overweight and/or obesity: a systematic review with meta-analyses**

Gianfranco Frigerio, Chiara Matilde Ferrari, and Silvia Fustinoni

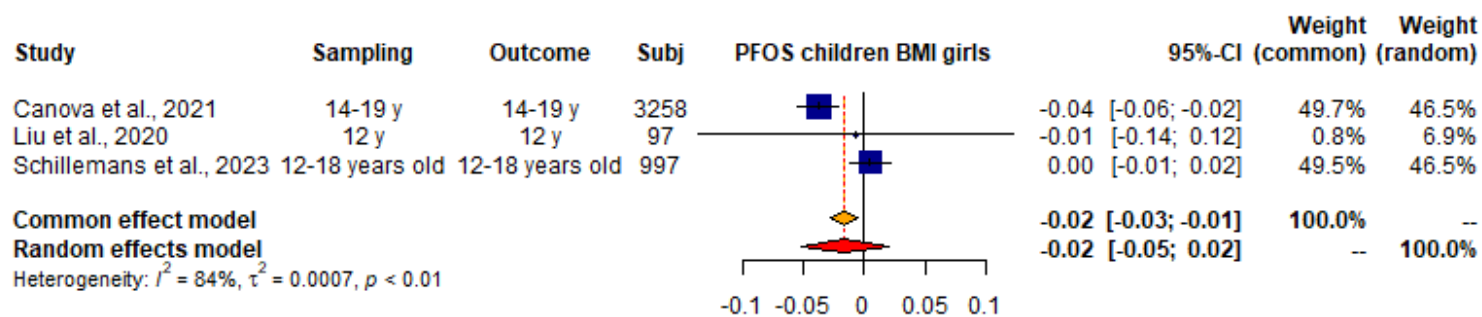

# Prenatal and childhood exposure to per-/polyfluoroalkyl substances (PFASs) and its associations with childhood overweight and/or obesity: a systematic review with meta-analyses

Gianfranco Frigerio, Chiara Matilde Ferrari, and Silvia Fustinoni

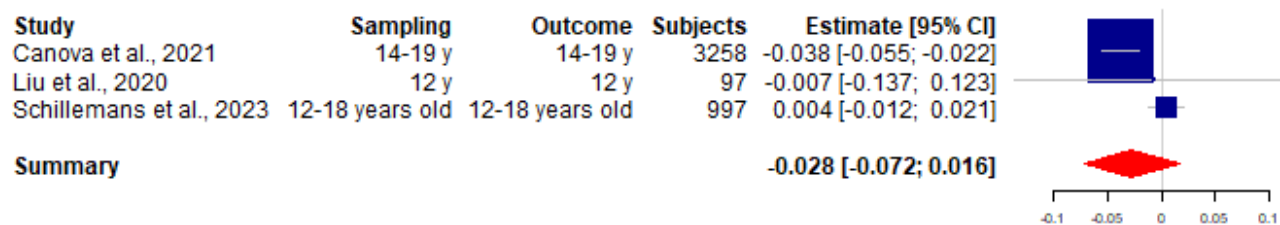

Prenatal and childhood exposure to per-/polyfluoroalkyl substances (PFASs) and its associations with childhood overweight and/or obesity: a systematic review with meta-analyses

Gianfranco Frigerio, Chiara Matilde Ferrari, and Silvia Fustinoni

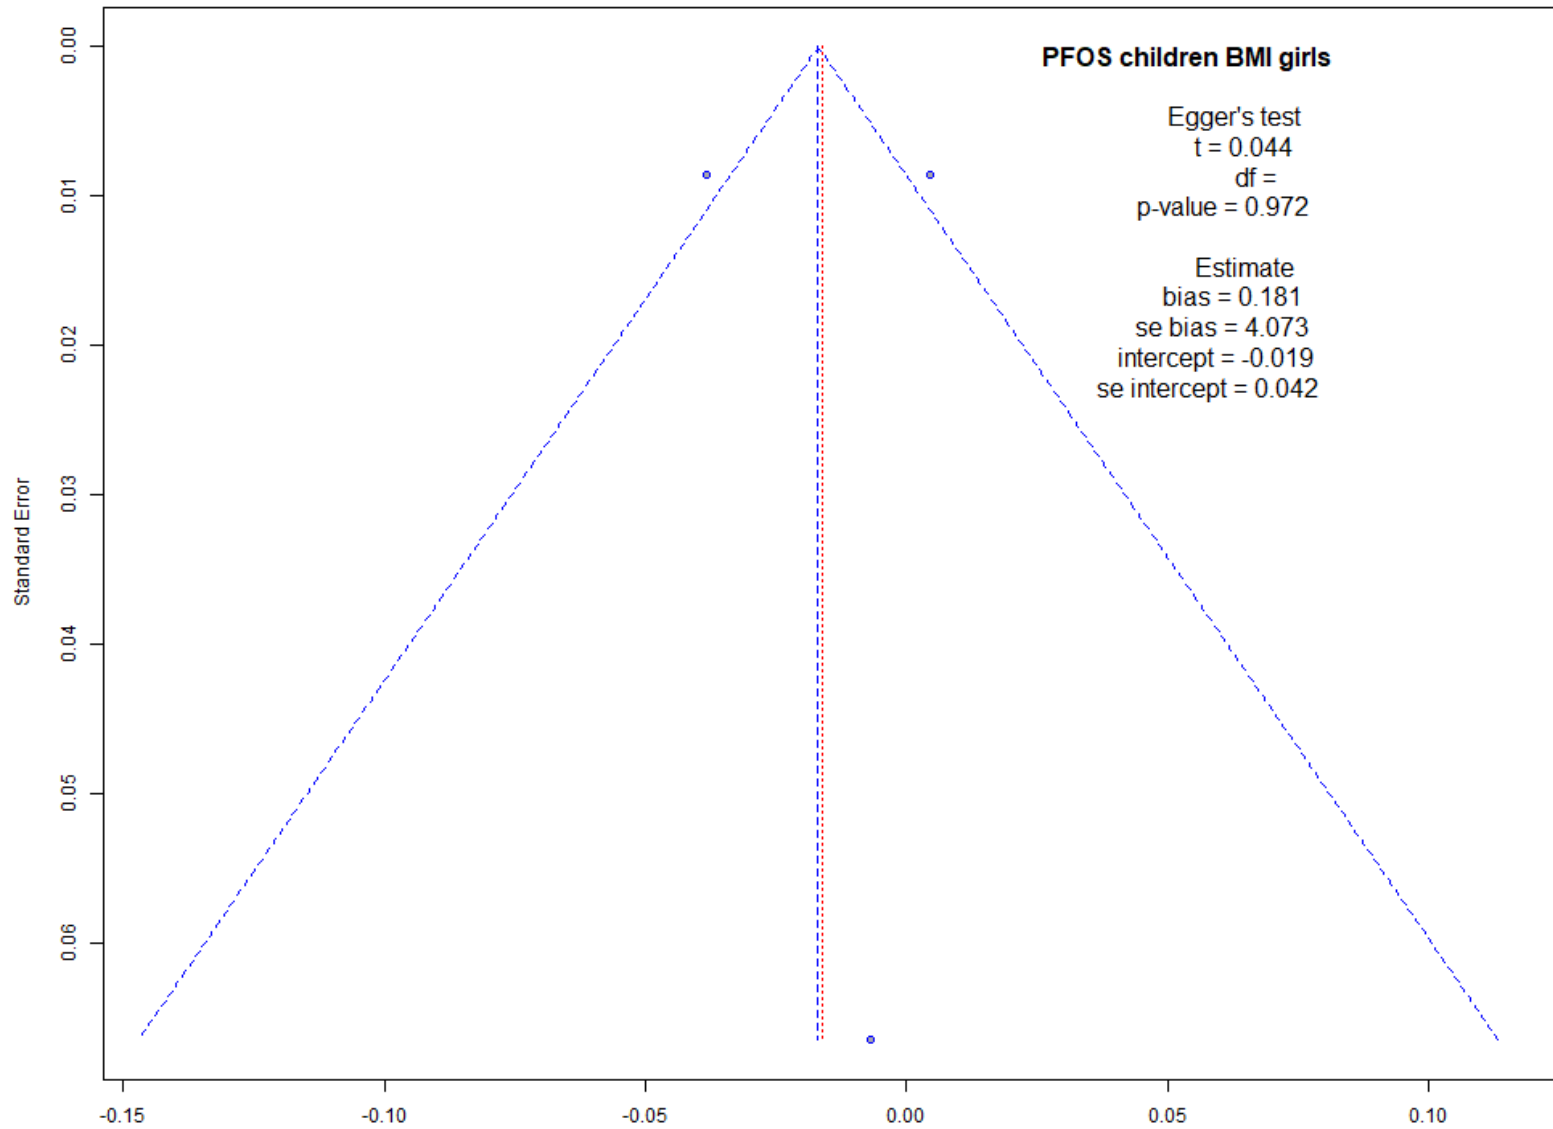

# Prenatal and childhood exposure to per-/polyfluoroalkyl substances (PFASs) and its associations with childhood overweight and/or obesity: a systematic review with meta-analyses

Gianfranco Frigerio, Chiara Matilde Ferrari, and Silvia Fustinoni

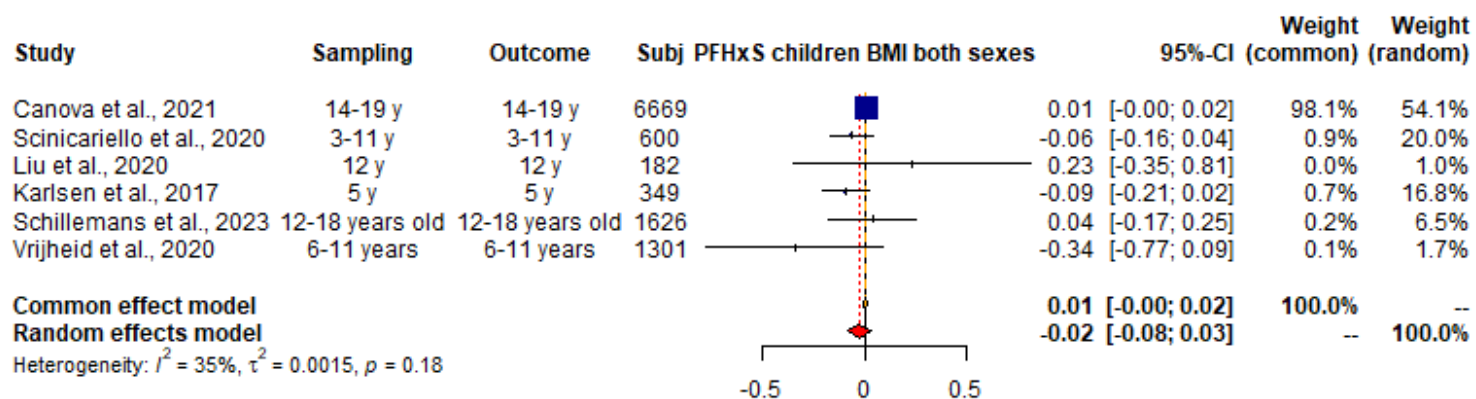

**Prenatal and childhood exposure to per-/polyfluoroalkyl substances (PFASs) and its associations with childhood overweight and/or obesity: a systematic review with meta-analyses**

Gianfranco Frigerio, Chiara Matilde Ferrari, and Silvia Fustinoni

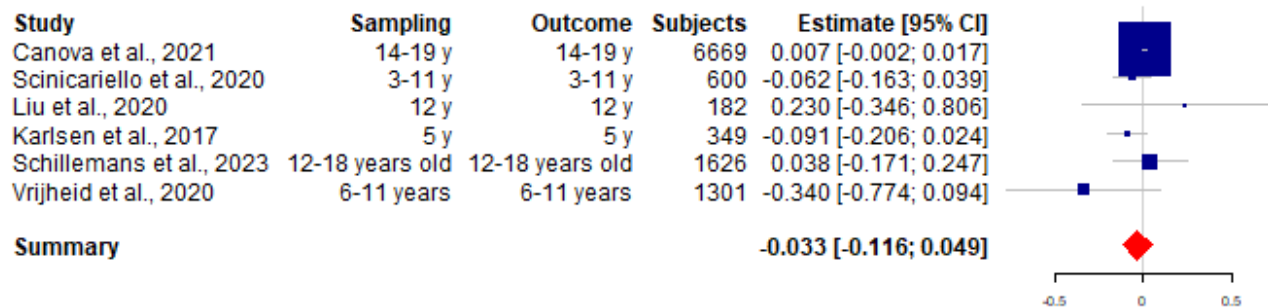

Prenatal and childhood exposure to per-/polyfluoroalkyl substances (PFASs) and its associations with childhood overweight and/or obesity: a systematic review with meta-analyses

Gianfranco Frigerio, Chiara Matilde Ferrari, and Silvia Fustinoni

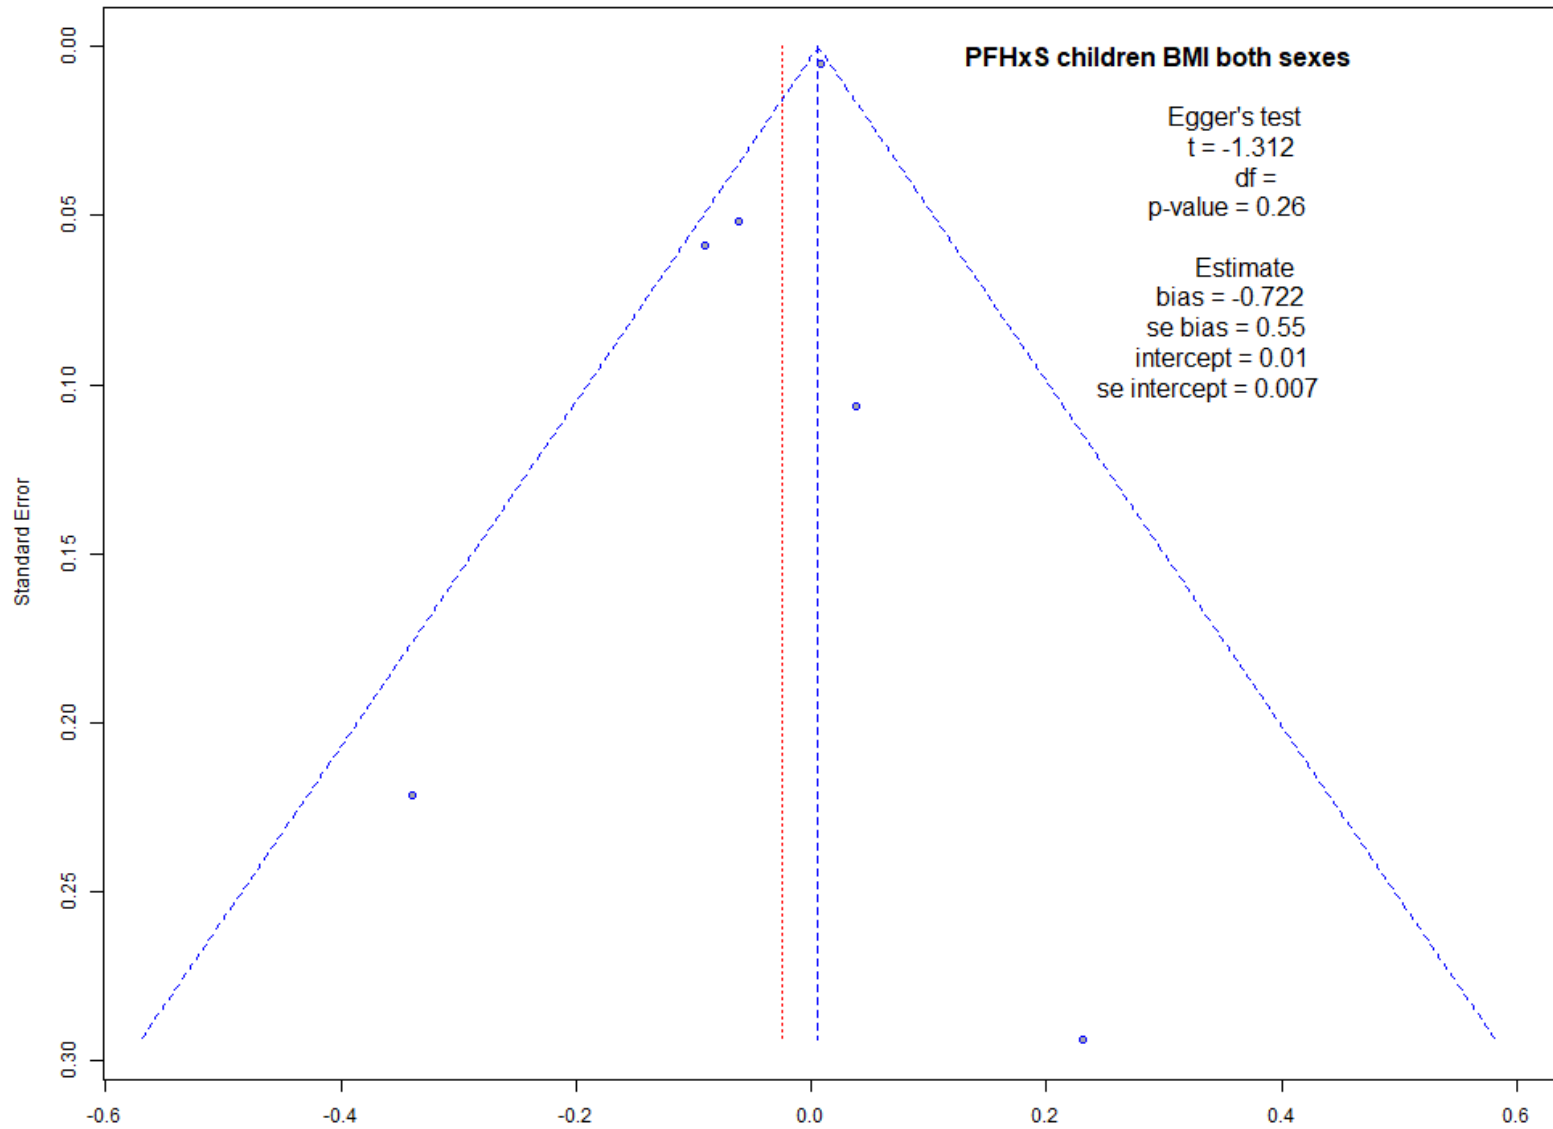



**Prenatal and childhood exposure to per-/polyfluoroalkyl substances (PFASs) and its associations with childhood overweight and/or obesity: a systematic review with meta-analyses**

Gianfranco Frigerio, Chiara Matilde Ferrari, and Silvia Fustinoni

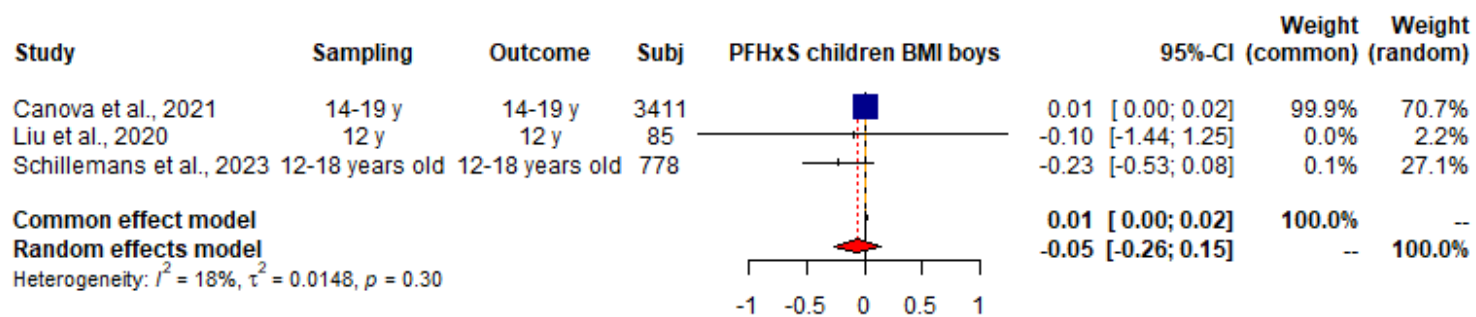

**Prenatal and childhood exposure to per-/polyfluoroalkyl substances (PFASs) and its associations with childhood overweight and/or obesity: a systematic review with meta-analyses**

Gianfranco Frigerio, Chiara Matilde Ferrari, and Silvia Fustinoni

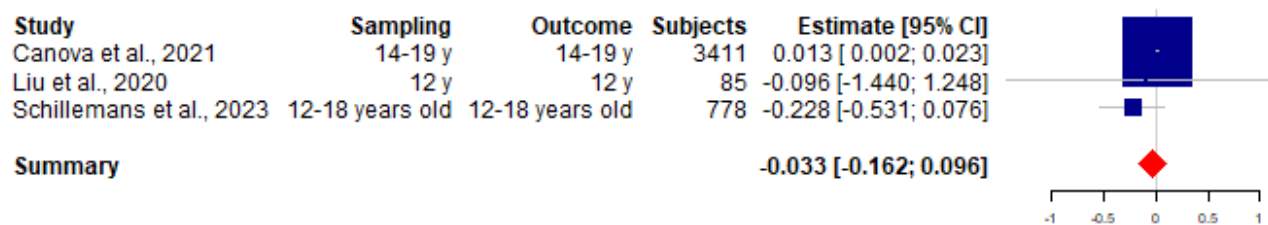

Prenatal and childhood exposure to per-/polyfluoroalkyl substances (PFASs) and its associations with childhood overweight and/or obesity: a systematic review with meta-analyses

Gianfranco Frigerio, Chiara Matilde Ferrari, and Silvia Fustinoni

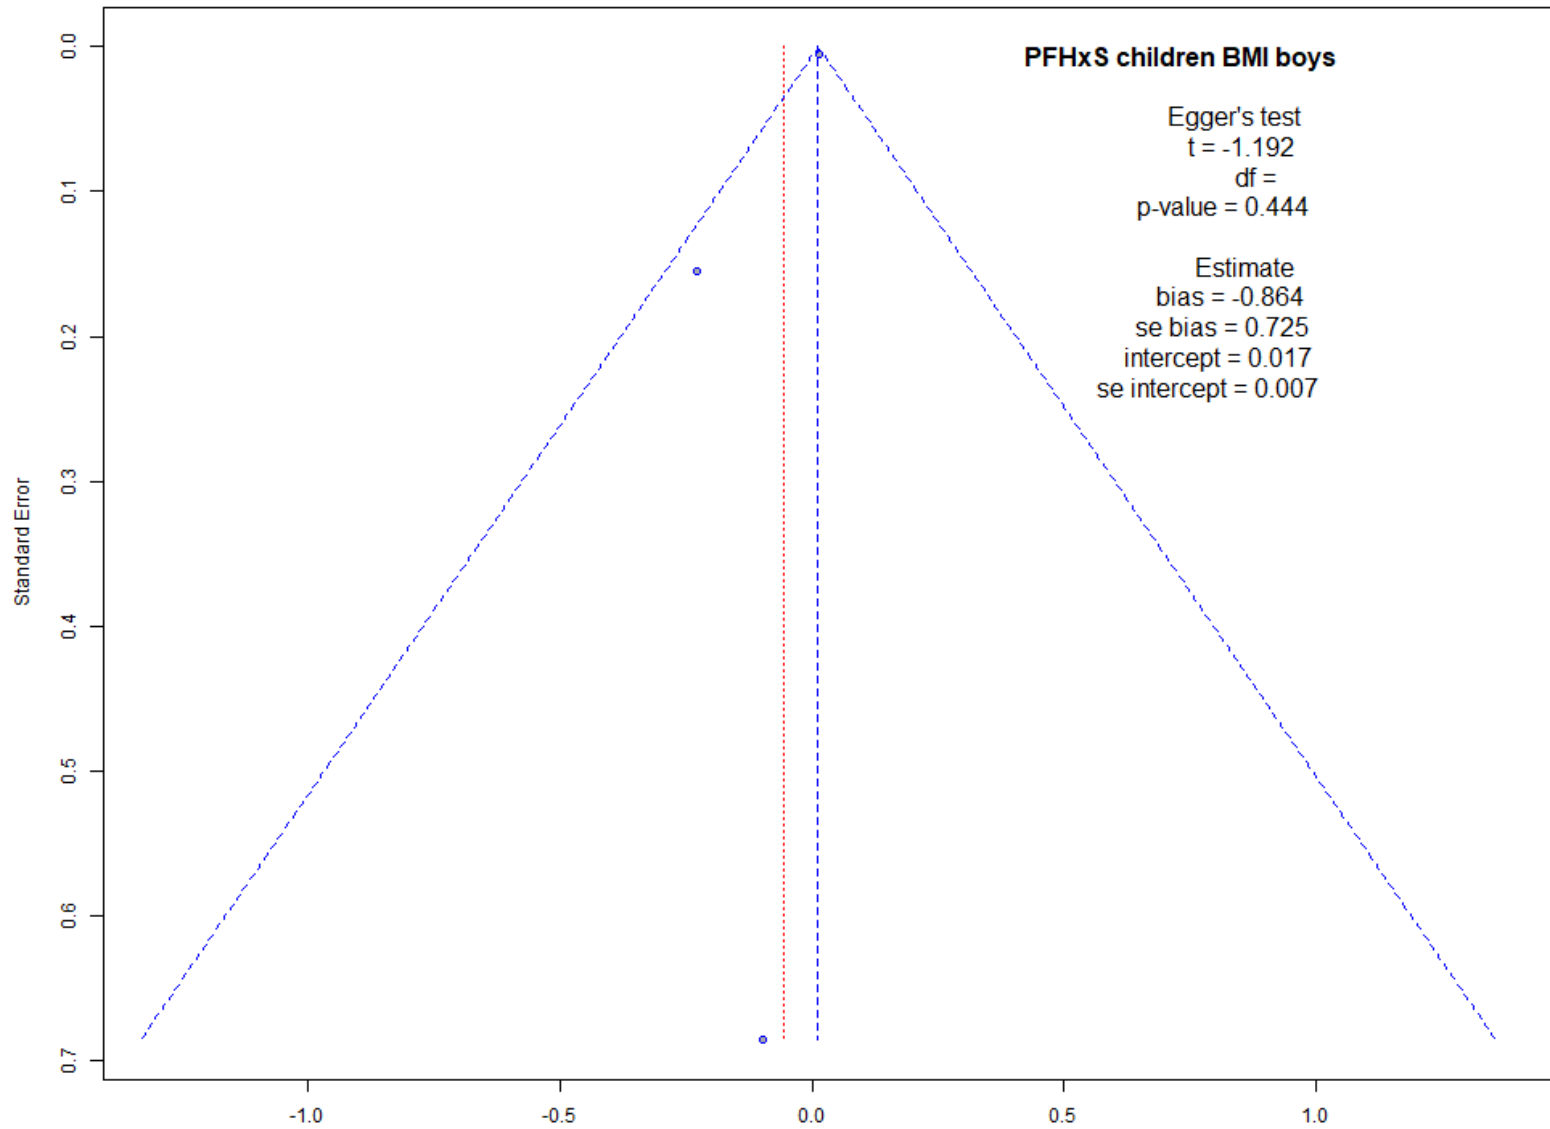

**Prenatal and childhood exposure to per-/polyfluoroalkyl substances (PFASs) and its associations with childhood overweight and/or obesity: a systematic review with meta-analyses**

Gianfranco Frigerio, Chiara Matilde Ferrari, and Silvia Fustinoni

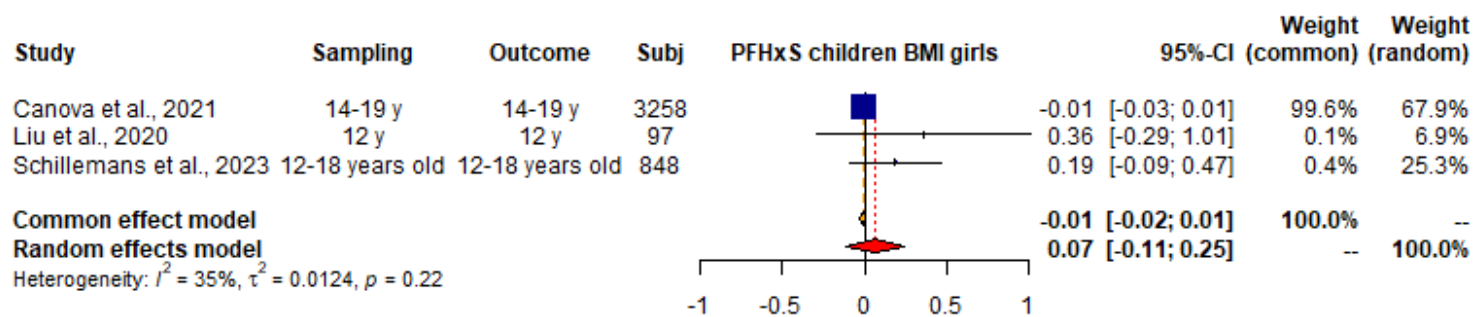

# Prenatal and childhood exposure to per-/polyfluoroalkyl substances (PFASs) and its associations with childhood overweight and/or obesity: a systematic review with meta-analyses

Gianfranco Frigerio, Chiara Matilde Ferrari, and Silvia Fustinoni

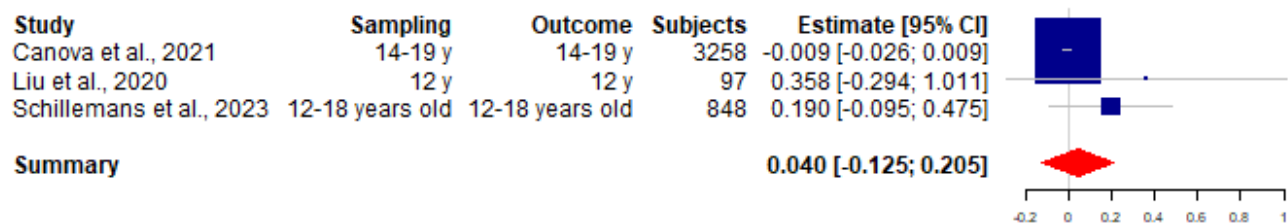

Prenatal and childhood exposure to per-/polyfluoroalkyl substances (PFASs) and its associations with childhood overweight and/or obesity: a systematic review with meta-analyses

Gianfranco Frigerio, Chiara Matilde Ferrari, and Silvia Fustinoni

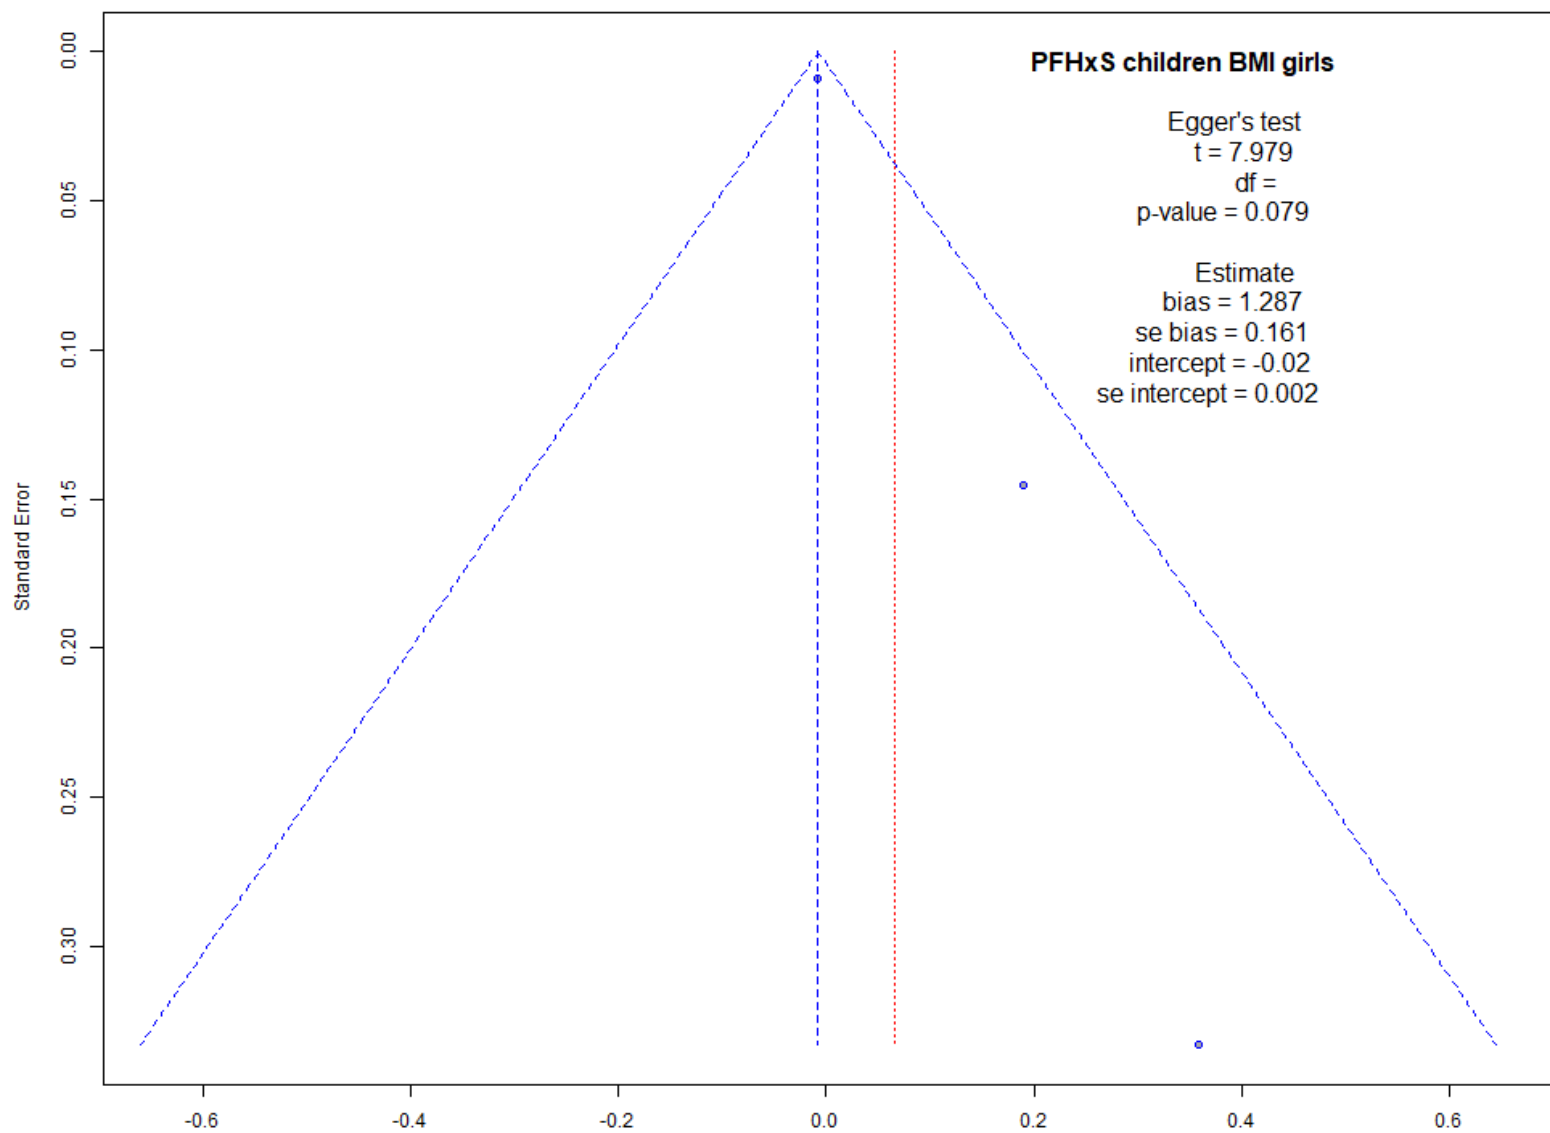

Prenatal and childhood exposure to per-/polyfluoroalkyl substances (PFASs) and its associations with childhood overweight and/or obesity: a systematic review with meta-analyses

Gianfranco Frigerio, Chiara Matilde Ferrari, and Silvia Fustinoni

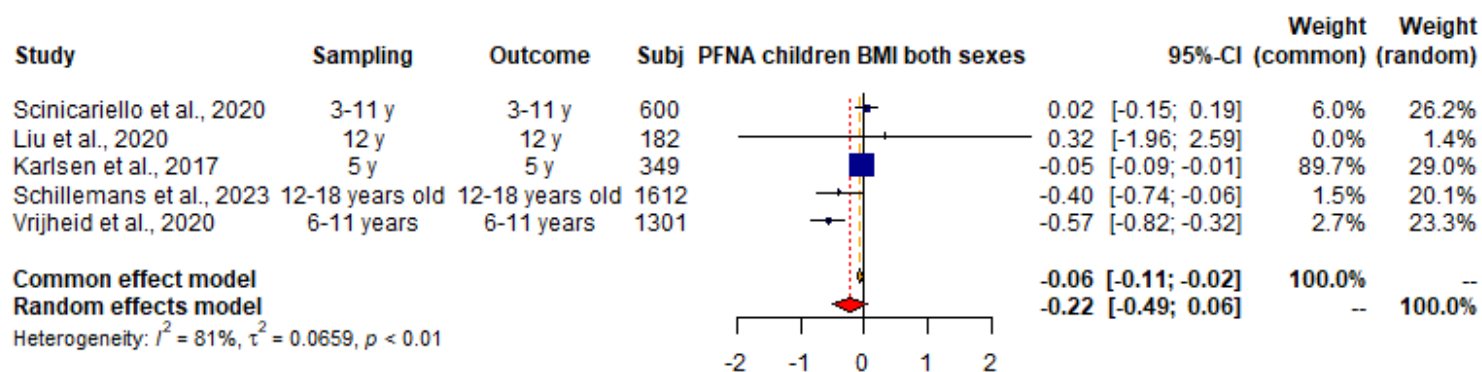

**Prenatal and childhood exposure to per-/polyfluoroalkyl substances (PFASs) and its associations with childhood overweight and/or obesity: a systematic review with meta-analyses**

Gianfranco Frigerio, Chiara Matilde Ferrari, and Silvia Fustinoni

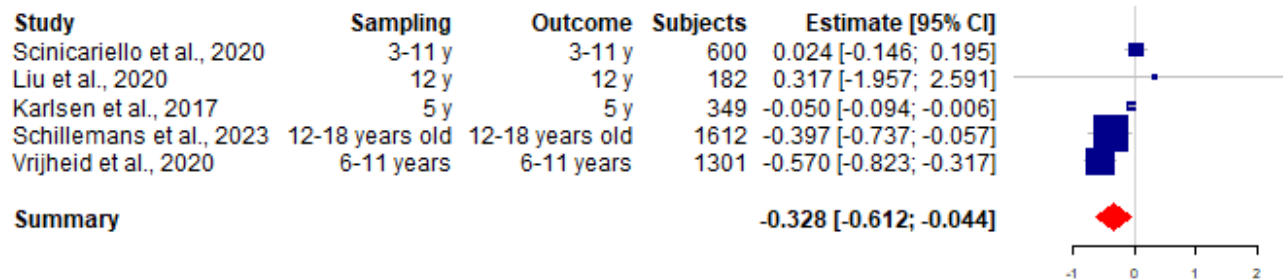



Prenatal and childhood exposure to per-/polyfluoroalkyl substances (PFASs) and its associations with childhood overweight and/or obesity: a systematic review with meta-analyses

Gianfranco Frigerio, Chiara Matilde Ferrari, and Silvia Fustinoni

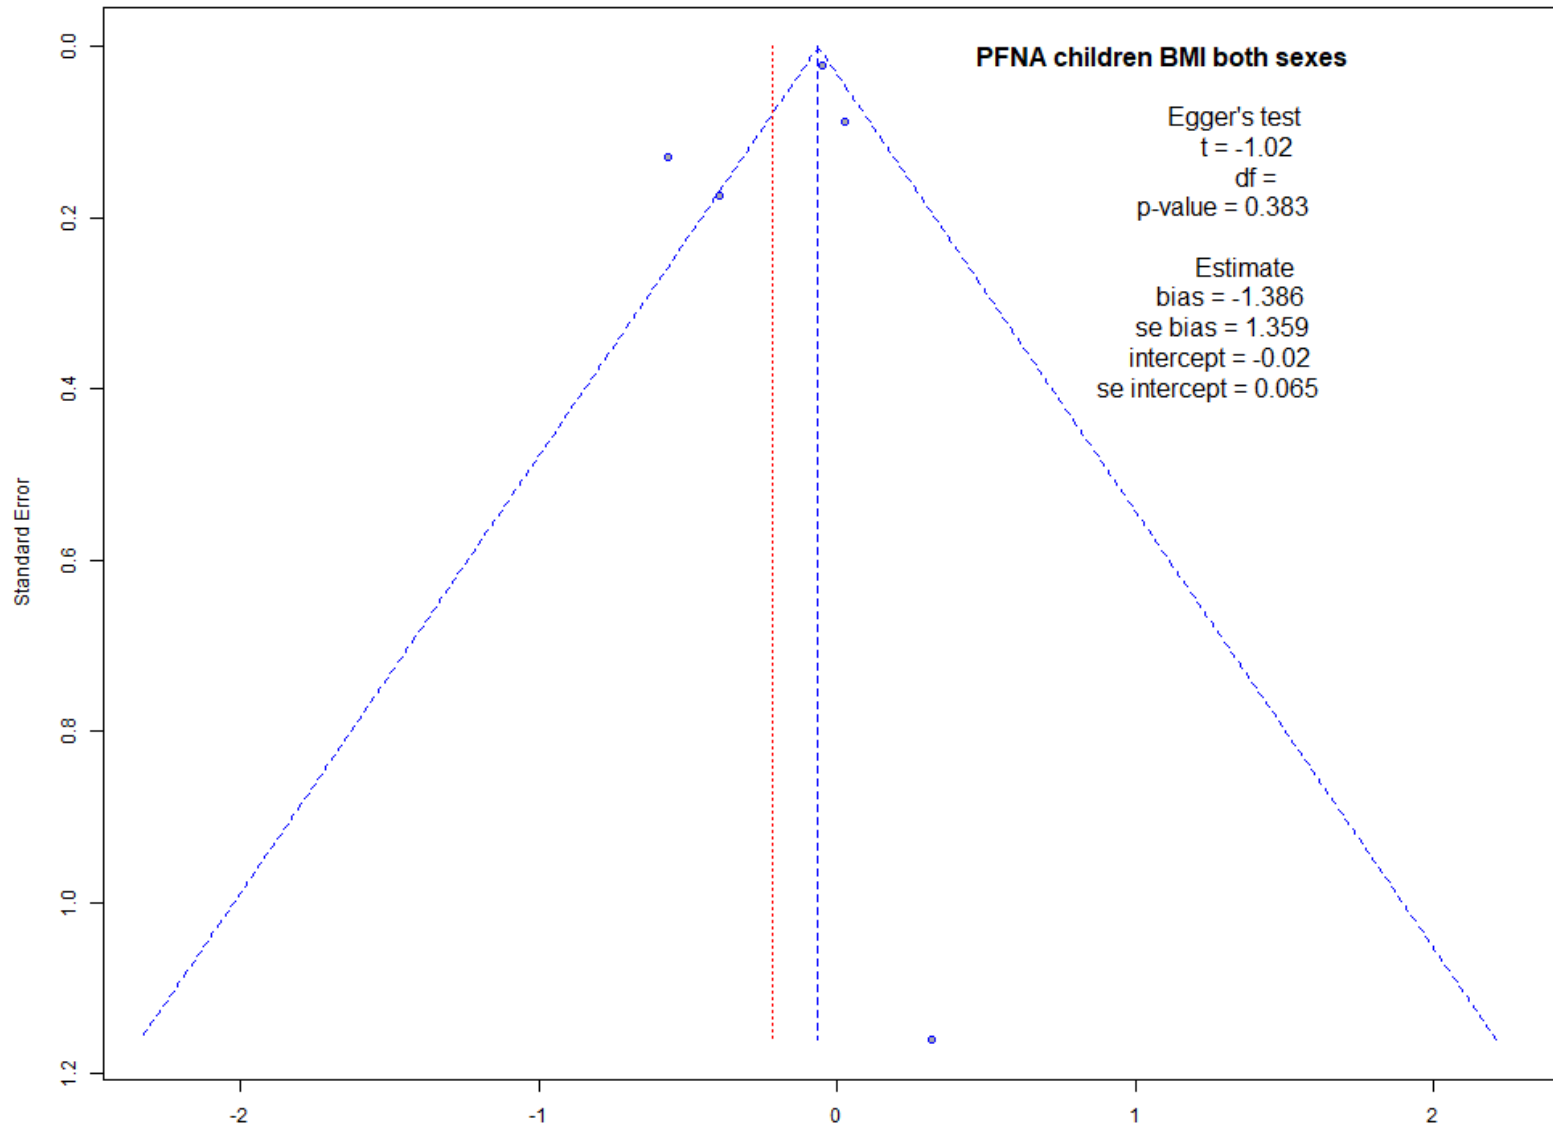

**Prenatal and childhood exposure to per-/polyfluoroalkyl substances (PFASs) and its associations with childhood overweight and/or obesity: a systematic review with meta-analyses**

Gianfranco Frigerio, Chiara Matilde Ferrari, and Silvia Fustinoni

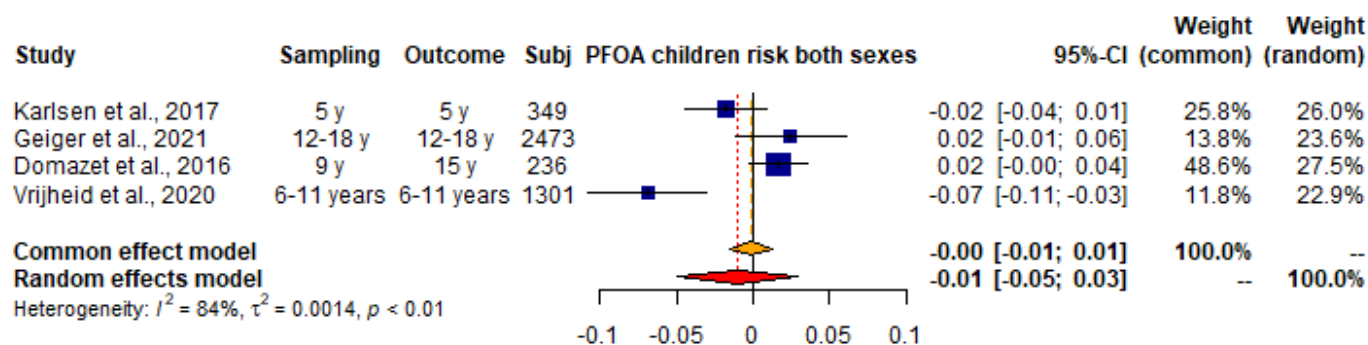

# Prenatal and childhood exposure to per-/polyfluoroalkyl substances (PFASs) and its associations with childhood overweight and/or obesity: a systematic review with meta-analyses

Gianfranco Frigerio, Chiara Matilde Ferrari, and Silvia Fustinoni

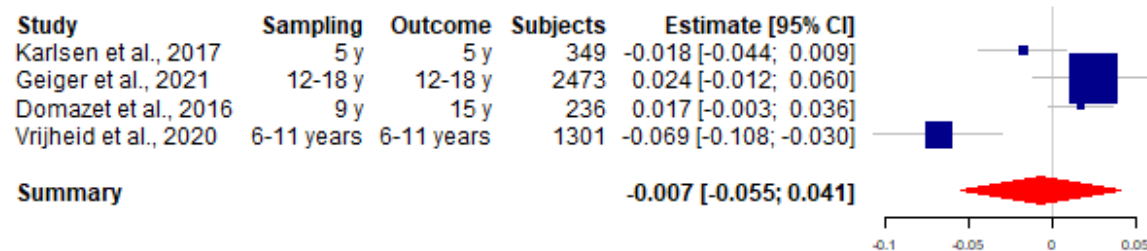

Prenatal and childhood exposure to per-/polyfluoroalkyl substances (PFASs) and its associations with childhood overweight and/or obesity: a systematic review with meta-analyses

Gianfranco Frigerio, Chiara Matilde Ferrari, and Silvia Fustinoni

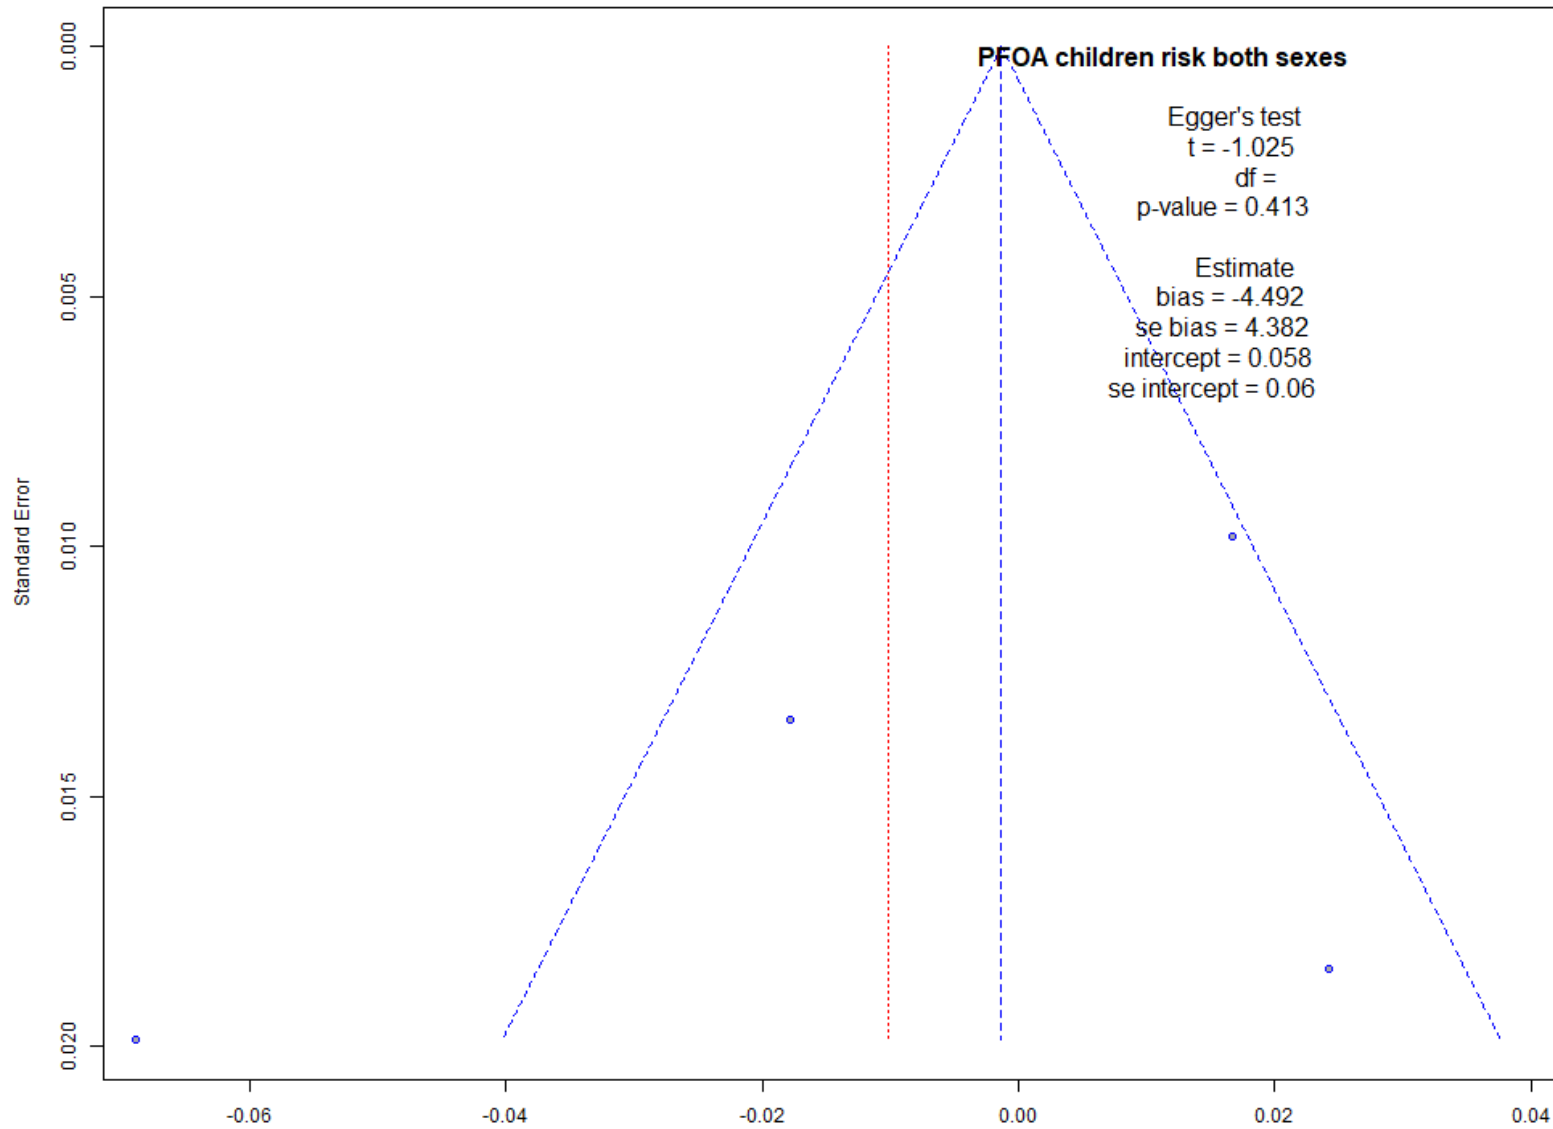

**Prenatal and childhood exposure to per-/polyfluoroalkyl substances (PFASs) and its associations with childhood overweight and/or obesity: a systematic review with meta-analyses**

Gianfranco Frigerio, Chiara Matilde Ferrari, and Silvia Fustinoni

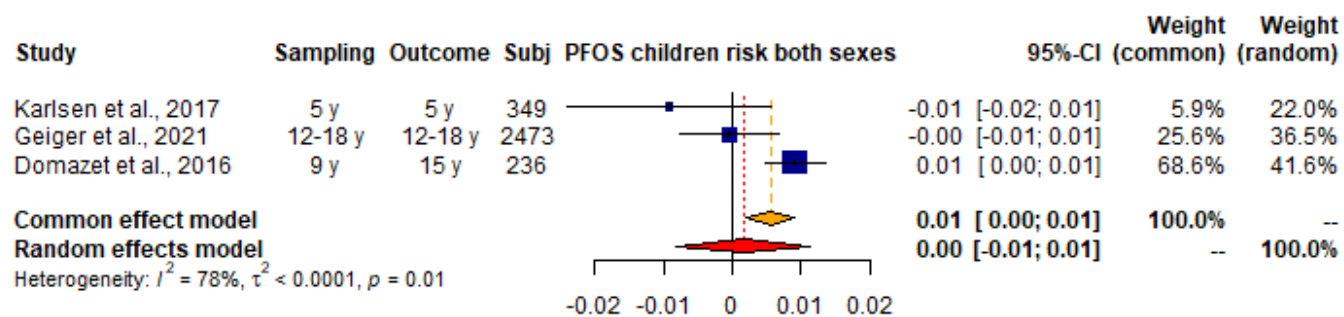

# Prenatal and childhood exposure to per-/polyfluoroalkyl substances (PFASs) and its associations with childhood overweight and/or obesity: a systematic review with meta-analyses

Gianfranco Frigerio, Chiara Matilde Ferrari, and Silvia Fustinoni

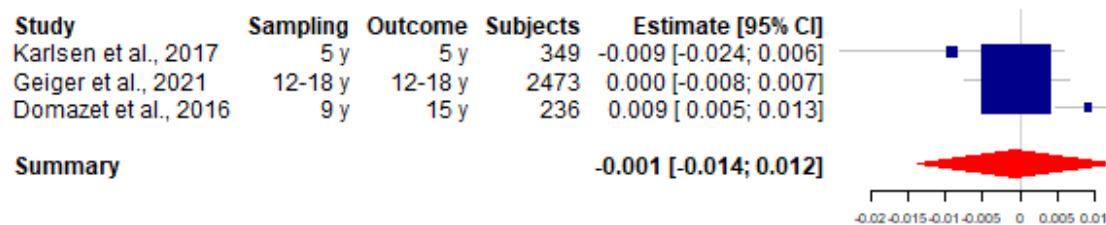

Prenatal and childhood exposure to per-/polyfluoroalkyl substances (PFASs) and its associations with childhood overweight and/or obesity: a systematic review with meta-analyses

Gianfranco Frigerio, Chiara Matilde Ferrari, and Silvia Fustinoni

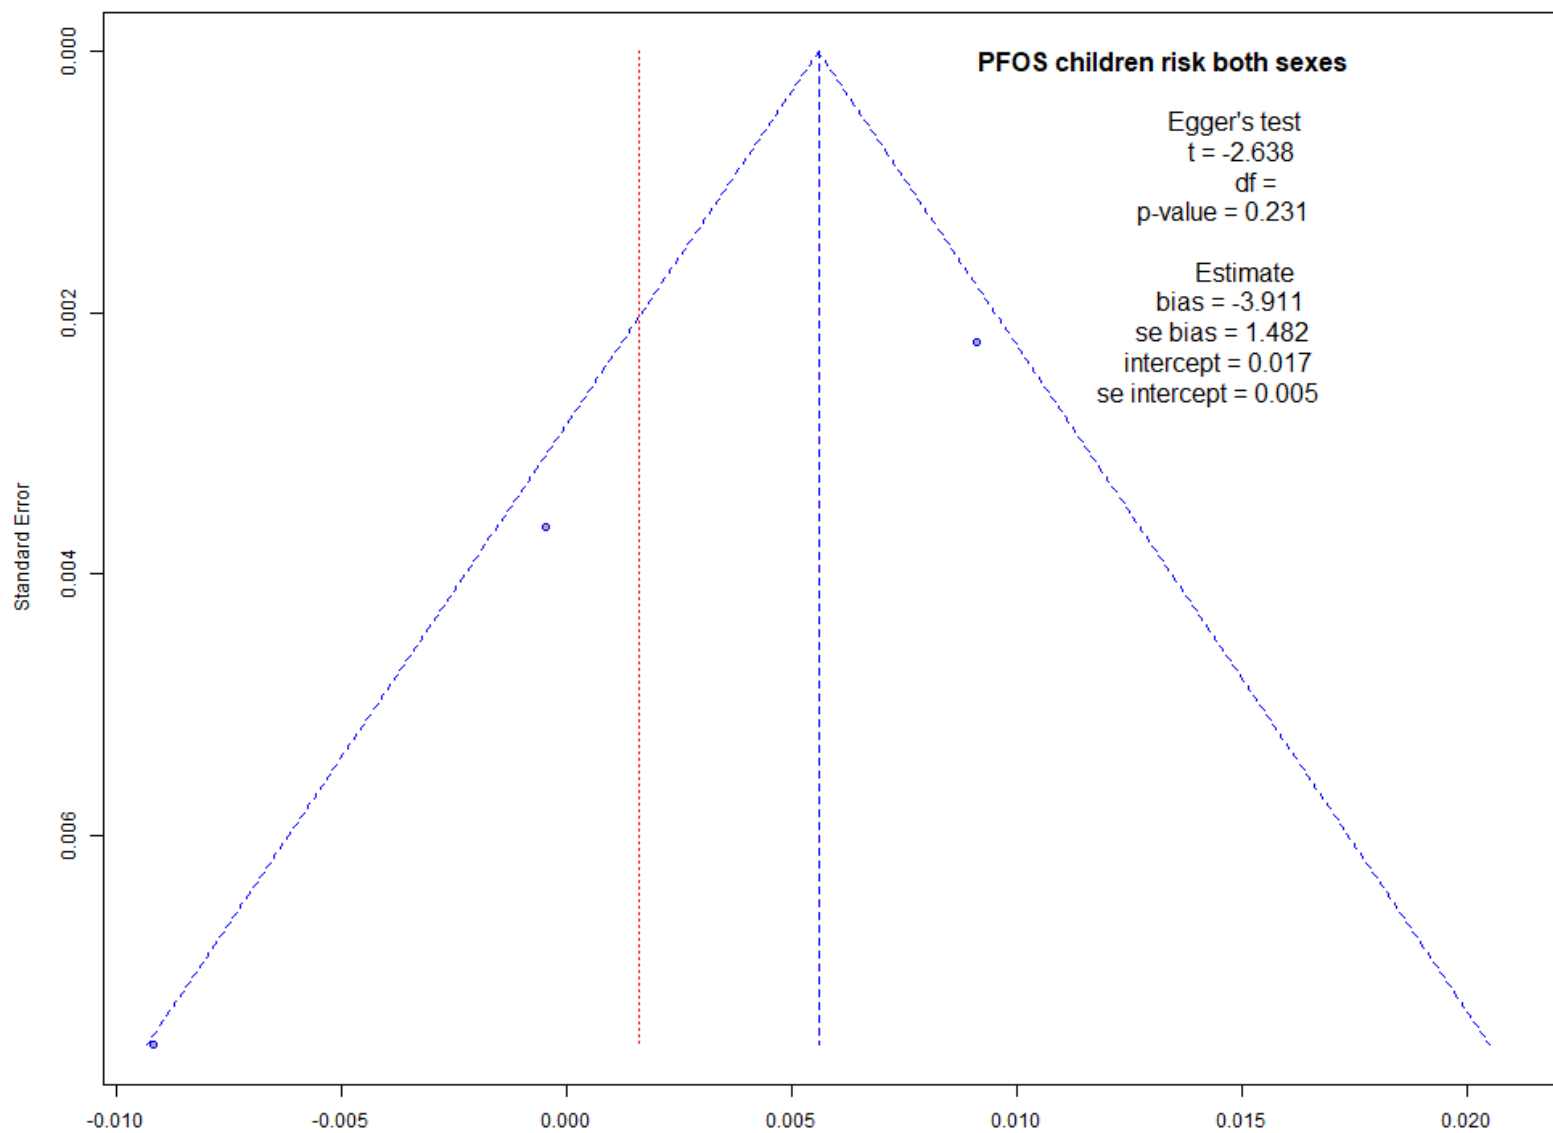

**Prenatal and childhood exposure to per-/polyfluoroalkyl substances (PFASs) and its associations with childhood overweight and/or obesity: a systematic review with meta-analyses**

Gianfranco Frigerio, Chiara Matilde Ferrari, and Silvia Fustinoni

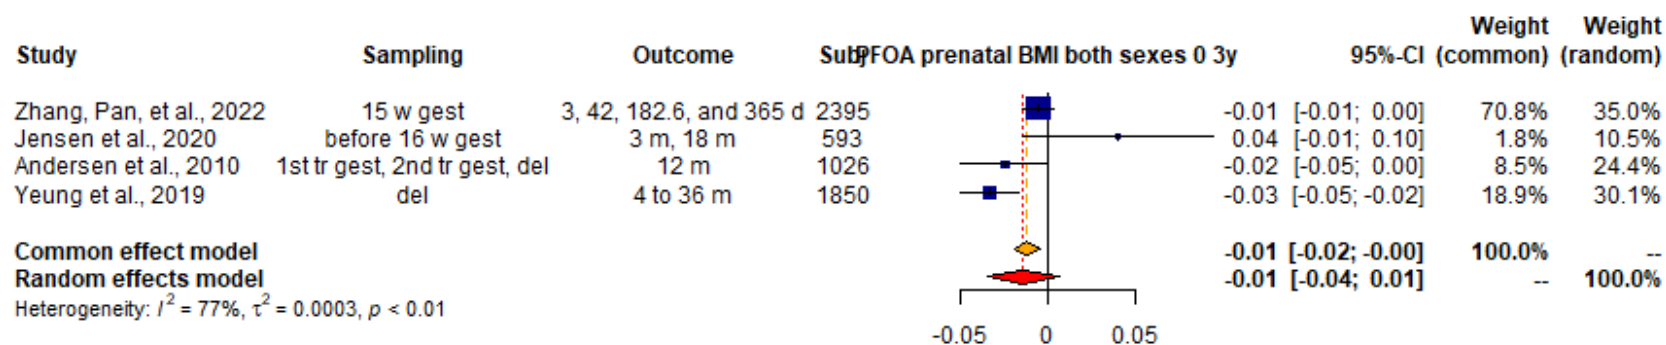



**Prenatal and childhood exposure to per-/polyfluoroalkyl substances (PFASs) and its associations with childhood overweight and/or obesity: a systematic review with meta-analyses**

Gianfranco Frigerio, Chiara Matilde Ferrari, and Silvia Fustinoni

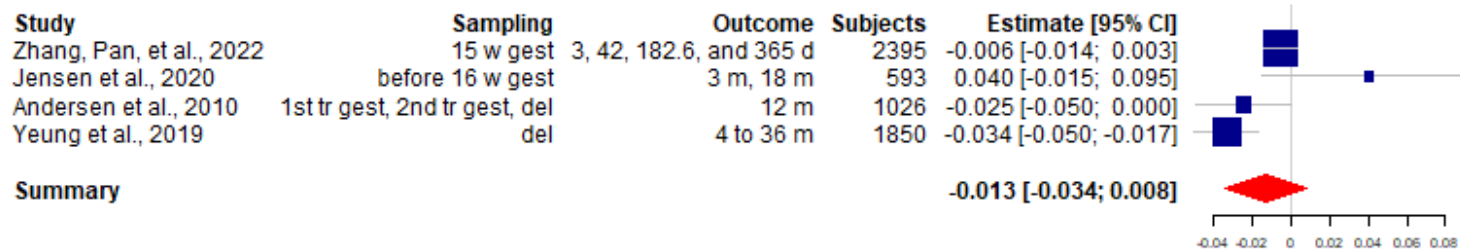

Prenatal and childhood exposure to per-/polyfluoroalkyl substances (PFASs) and its associations with childhood overweight and/or obesity: a systematic review with meta-analyses

Gianfranco Frigerio, Chiara Matilde Ferrari, and Silvia Fustinoni

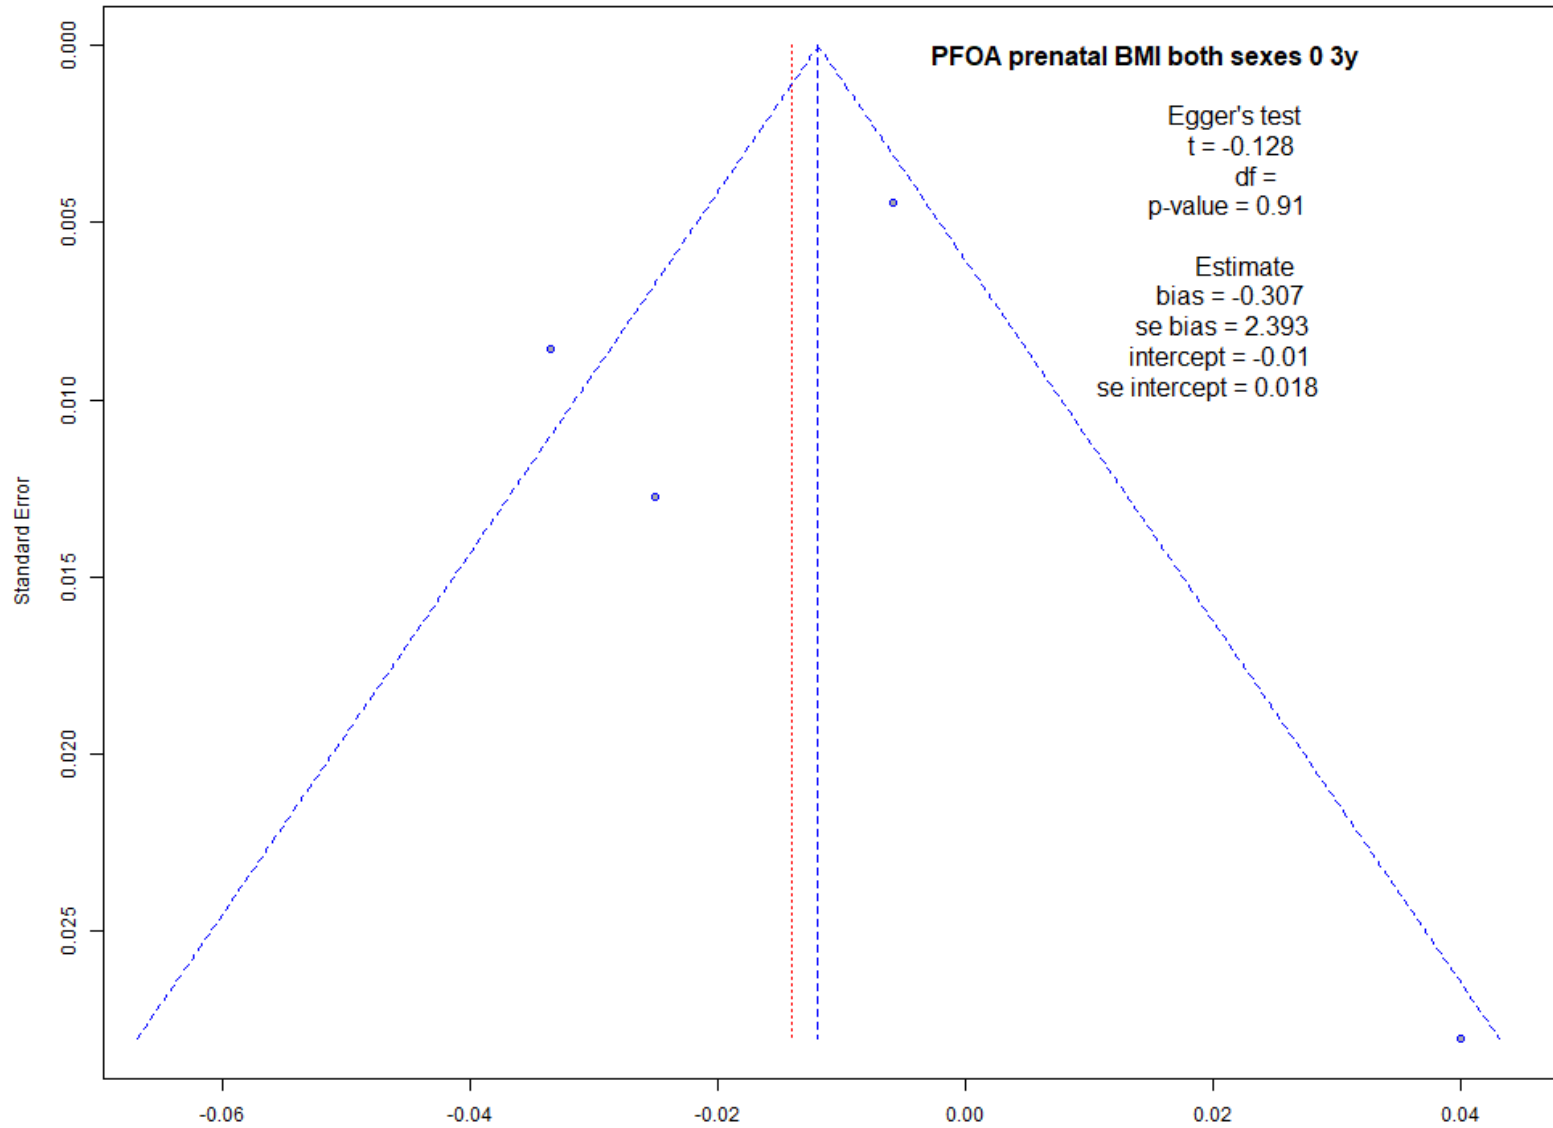

# Prenatal and childhood exposure to per-/polyfluoroalkyl substances (PFASs) and its associations with childhood overweight and/or obesity: a systematic review with meta-analyses

Gianfranco Frigerio, Chiara Matilde Ferrari, and Silvia Fustinoni

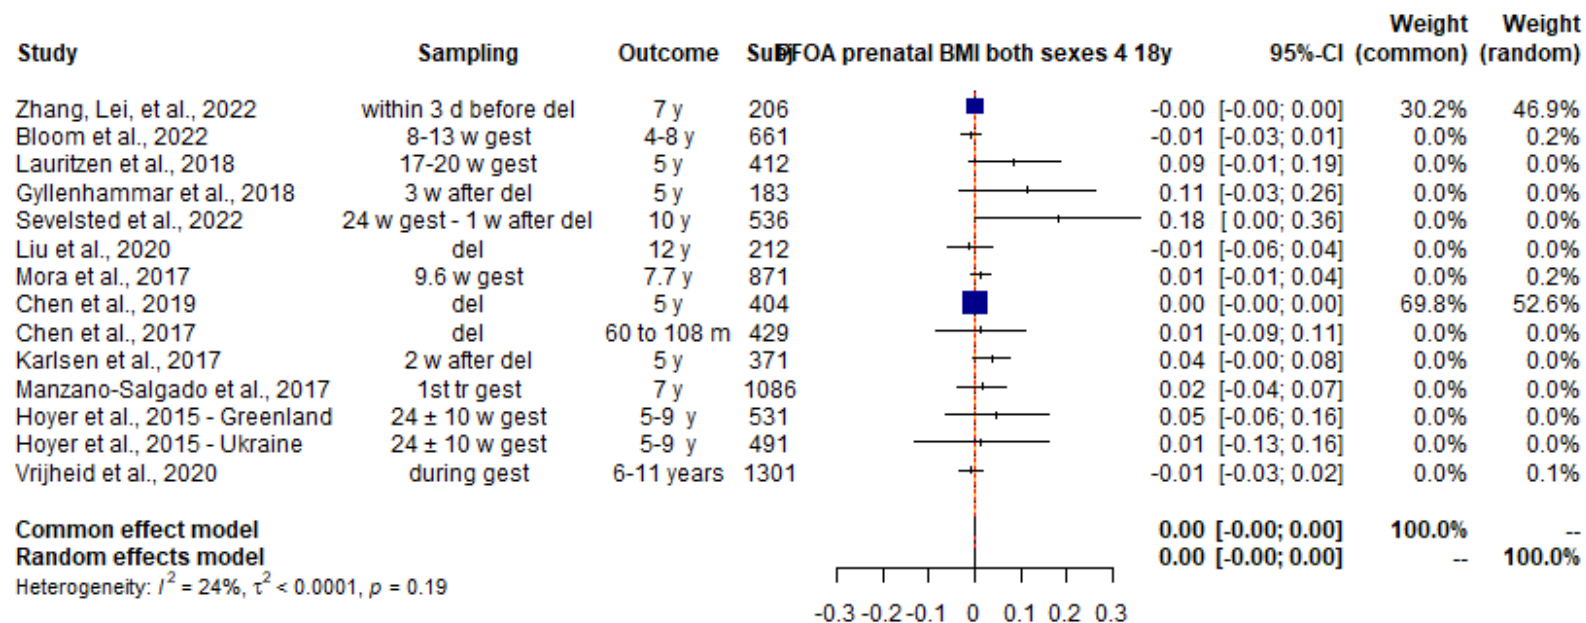

# Prenatal and childhood exposure to per-/polyfluoroalkyl substances (PFASs) and its associations with childhood overweight and/or obesity: a systematic review with meta-analyses

Gianfranco Frigerio, Chiara Matilde Ferrari, and Silvia Fustinoni

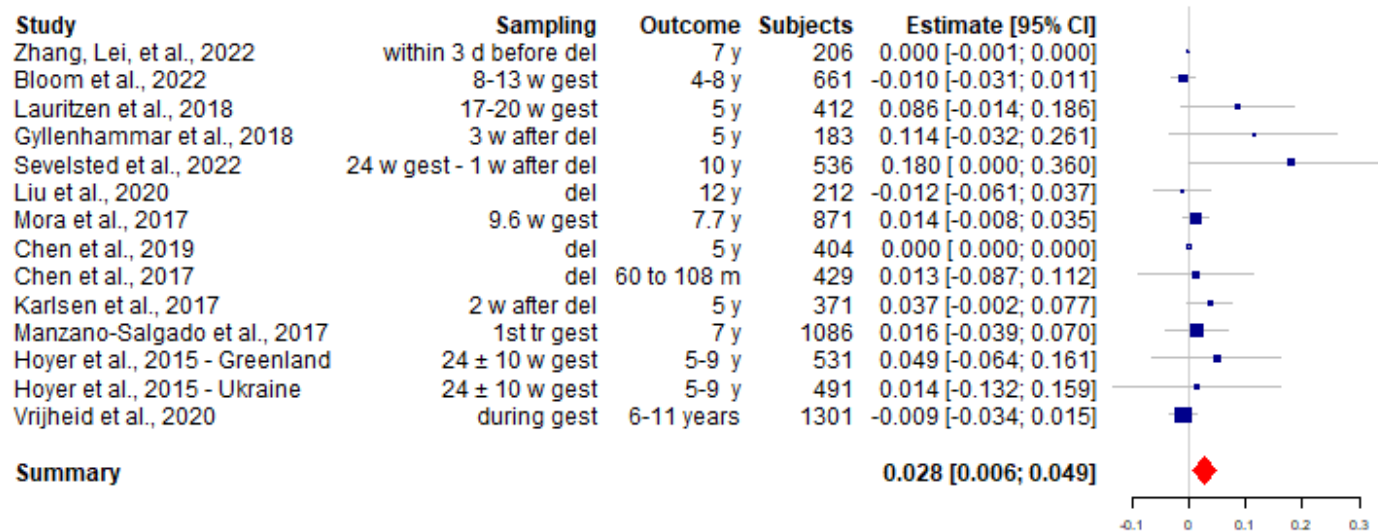

Prenatal and childhood exposure to per-/polyfluoroalkyl substances (PFASs) and its associations with childhood overweight and/or obesity: a systematic review with meta-analyses

Gianfranco Frigerio, Chiara Matilde Ferrari, and Silvia Fustinoni

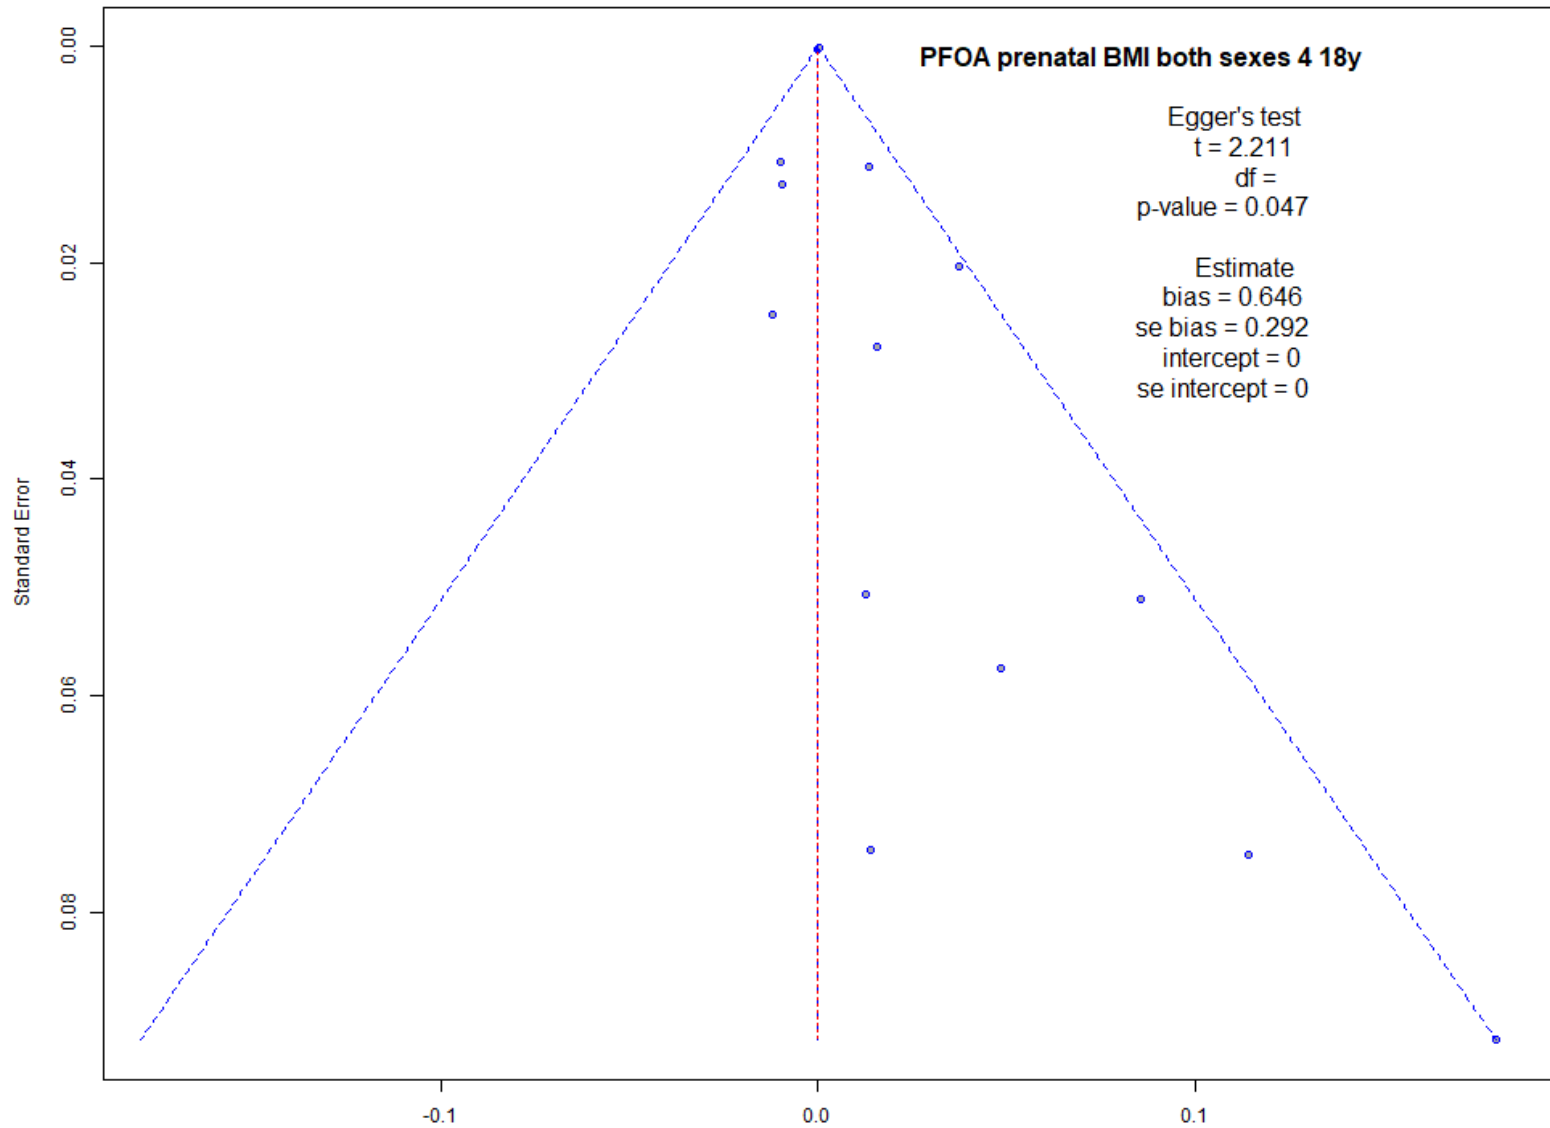

**Prenatal and childhood exposure to per-/polyfluoroalkyl substances (PFASs) and its associations with childhood overweight and/or obesity: a systematic review with meta-analyses**

Gianfranco Frigerio, Chiara Matilde Ferrari, and Silvia Fustinoni

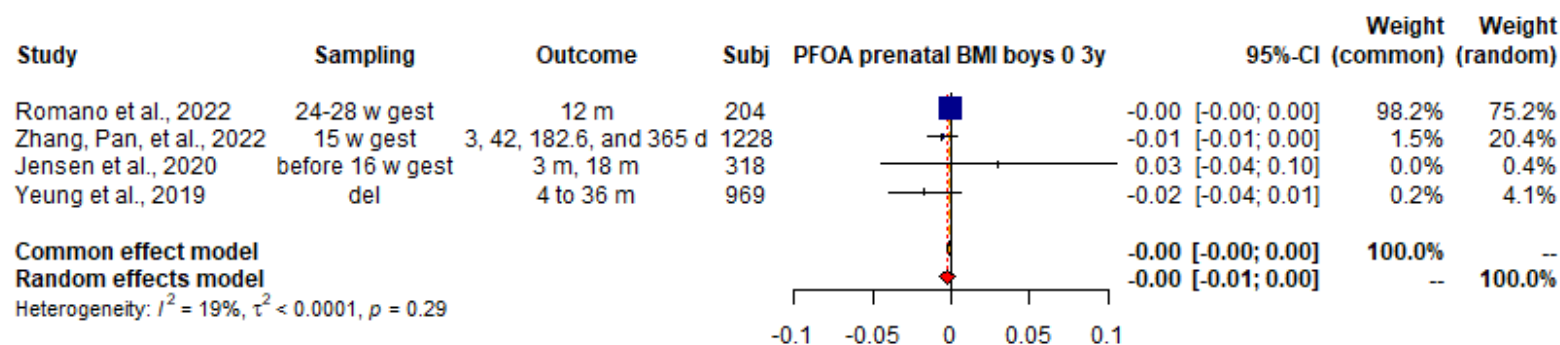

**Prenatal and childhood exposure to per-/polyfluoroalkyl substances (PFASs) and its associations with childhood overweight and/or obesity: a systematic review with meta-analyses**

Gianfranco Frigerio, Chiara Matilde Ferrari, and Silvia Fustinoni

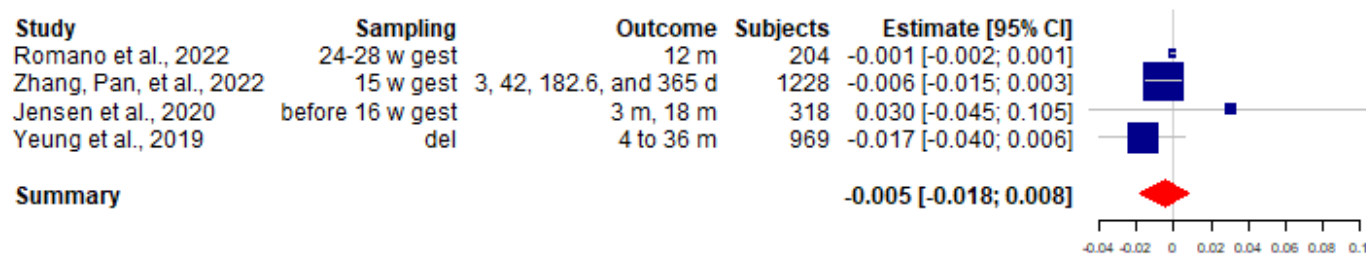

Prenatal and childhood exposure to per-/polyfluoroalkyl substances (PFASs) and its associations with childhood overweight and/or obesity: a systematic review with meta-analyses

Gianfranco Frigerio, Chiara Matilde Ferrari, and Silvia Fustinoni

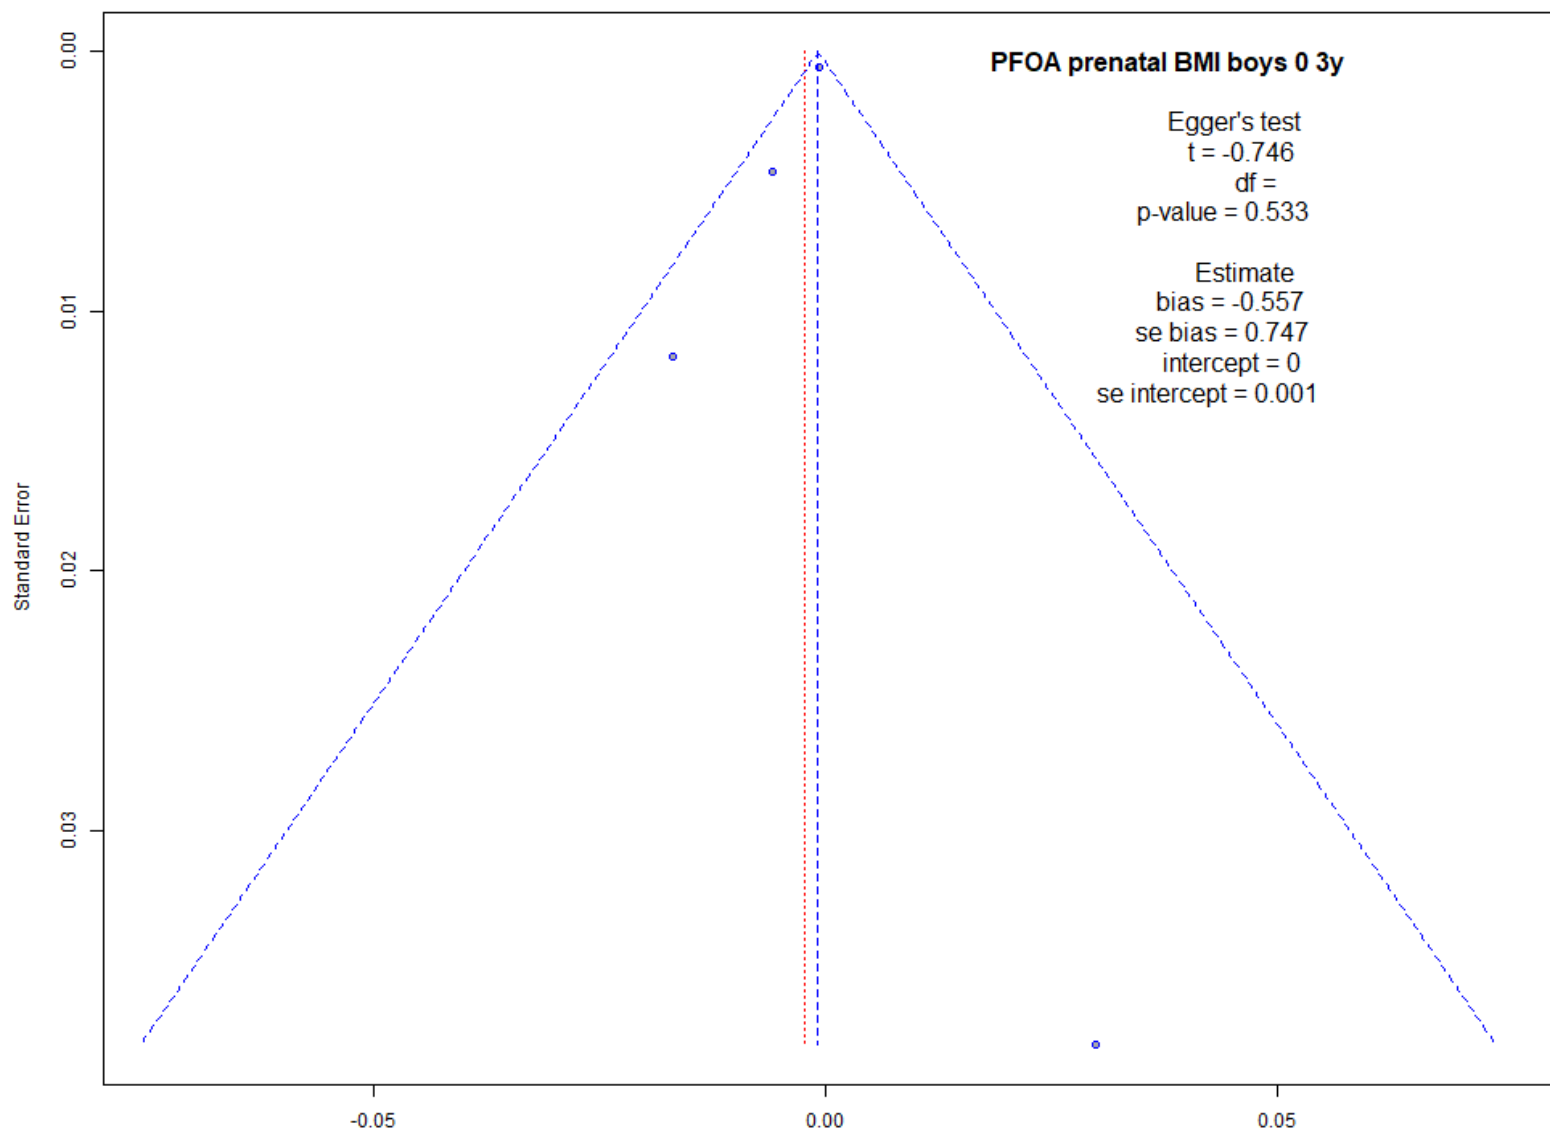



**Prenatal and childhood exposure to per-/polyfluoroalkyl substances (PFASs) and its associations with childhood overweight and/or obesity: a systematic review with meta-analyses**

Gianfranco Frigerio, Chiara Matilde Ferrari, and Silvia Fustinoni

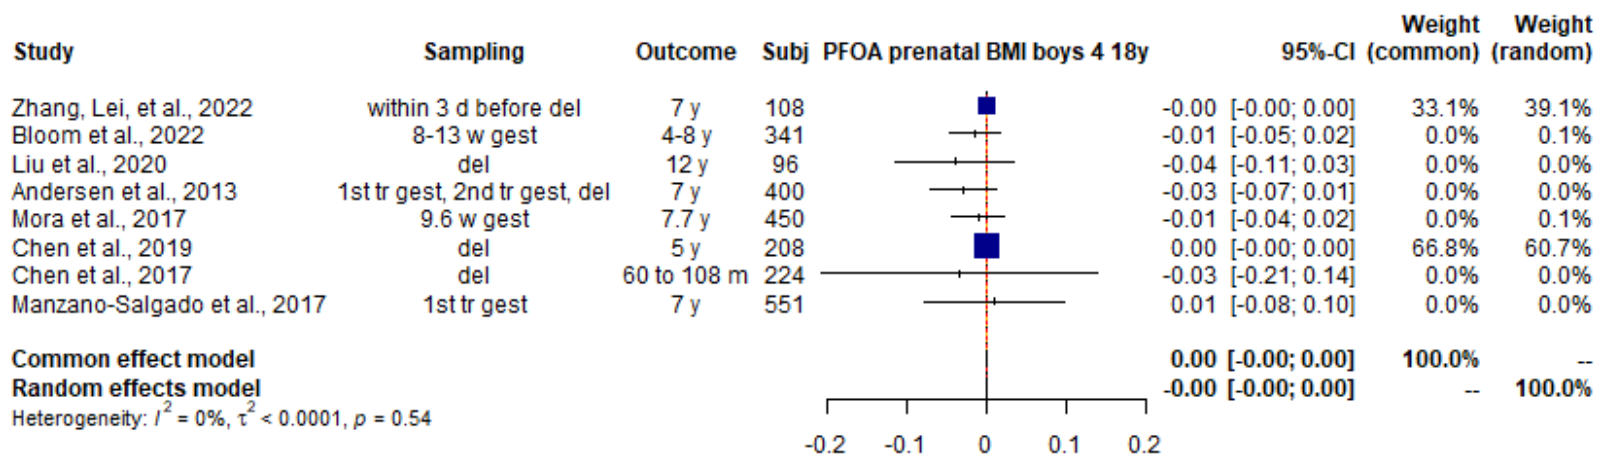

# Prenatal and childhood exposure to per-/polyfluoroalkyl substances (PFASs) and its associations with childhood overweight and/or obesity: a systematic review with meta-analyses

Gianfranco Frigerio, Chiara Matilde Ferrari, and Silvia Fustinoni

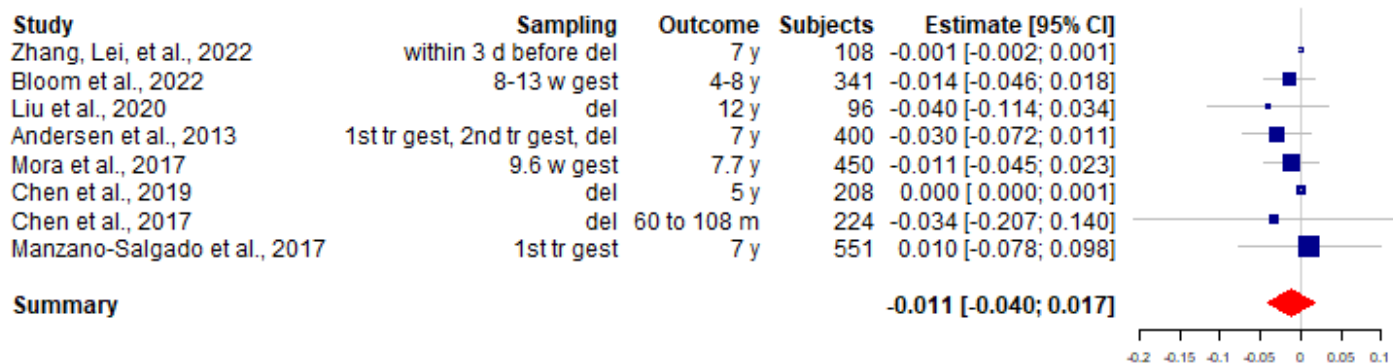

Prenatal and childhood exposure to per-/polyfluoroalkyl substances (PFASs) and its associations with childhood overweight and/or obesity: a systematic review with meta-analyses

Gianfranco Frigerio, Chiara Matilde Ferrari, and Silvia Fustinoni

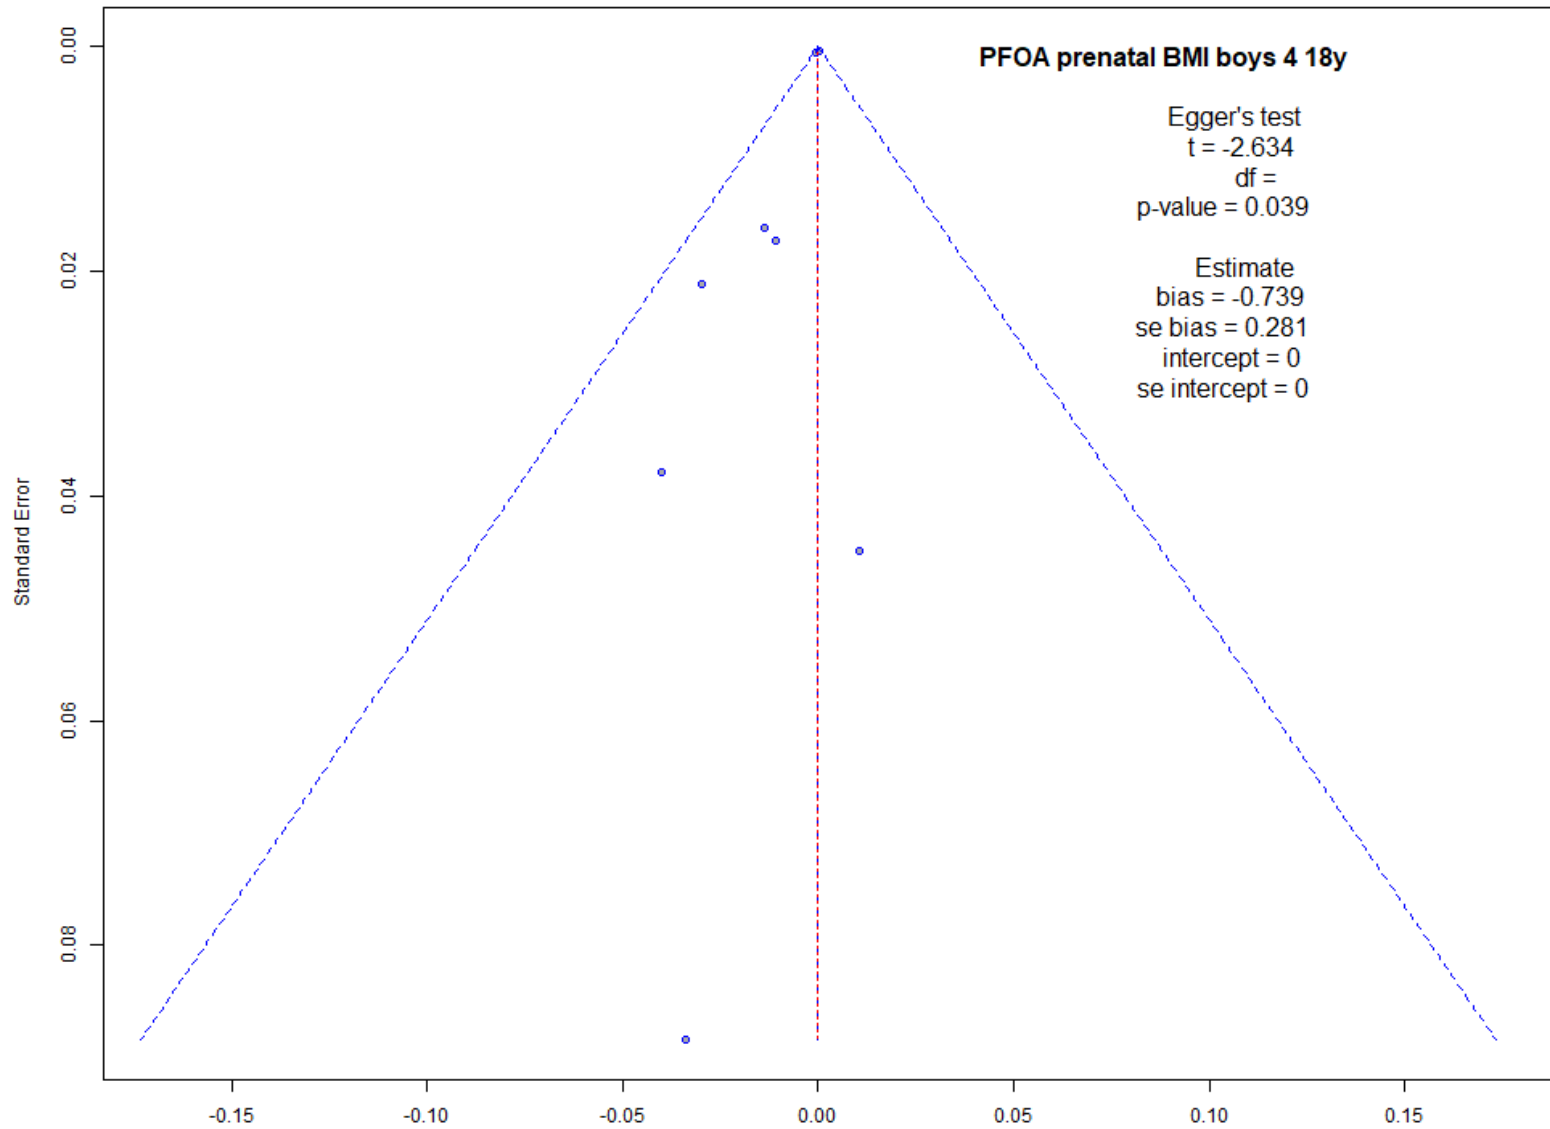

**Prenatal and childhood exposure to per-/polyfluoroalkyl substances (PFASs) and its associations with childhood overweight and/or obesity: a systematic review with meta-analyses**

Gianfranco Frigerio, Chiara Matilde Ferrari, and Silvia Fustinoni

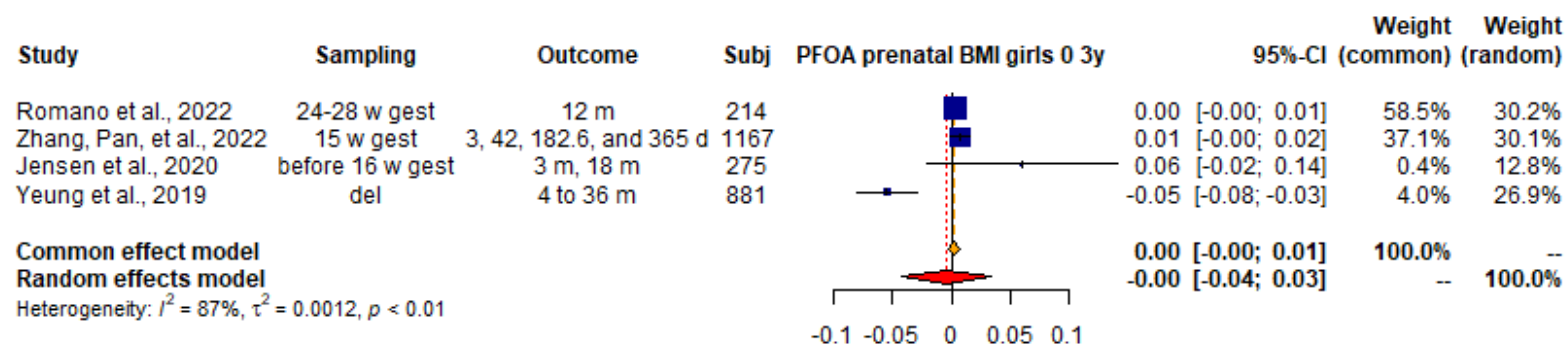

**Prenatal and childhood exposure to per-/polyfluoroalkyl substances (PFASs) and its associations with childhood overweight and/or obesity: a systematic review with meta-analyses**

Gianfranco Frigerio, Chiara Matilde Ferrari, and Silvia Fustinoni

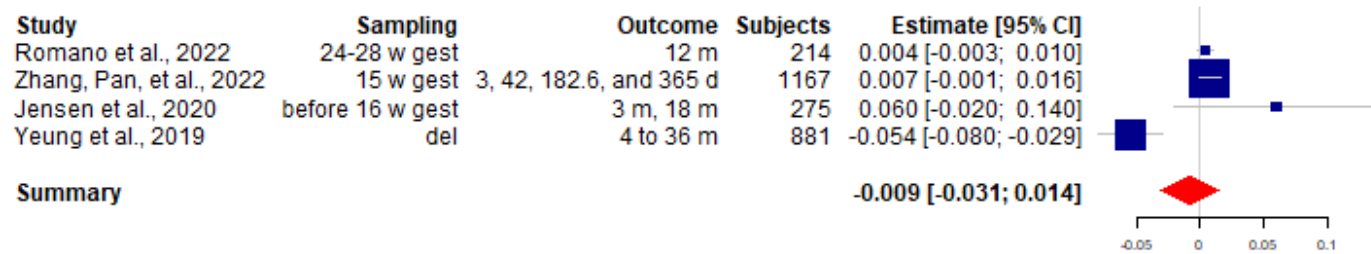

Prenatal and childhood exposure to per-/polyfluoroalkyl substances (PFASs) and its associations with childhood overweight and/or obesity: a systematic review with meta-analyses

Gianfranco Frigerio, Chiara Matilde Ferrari, and Silvia Fustinoni

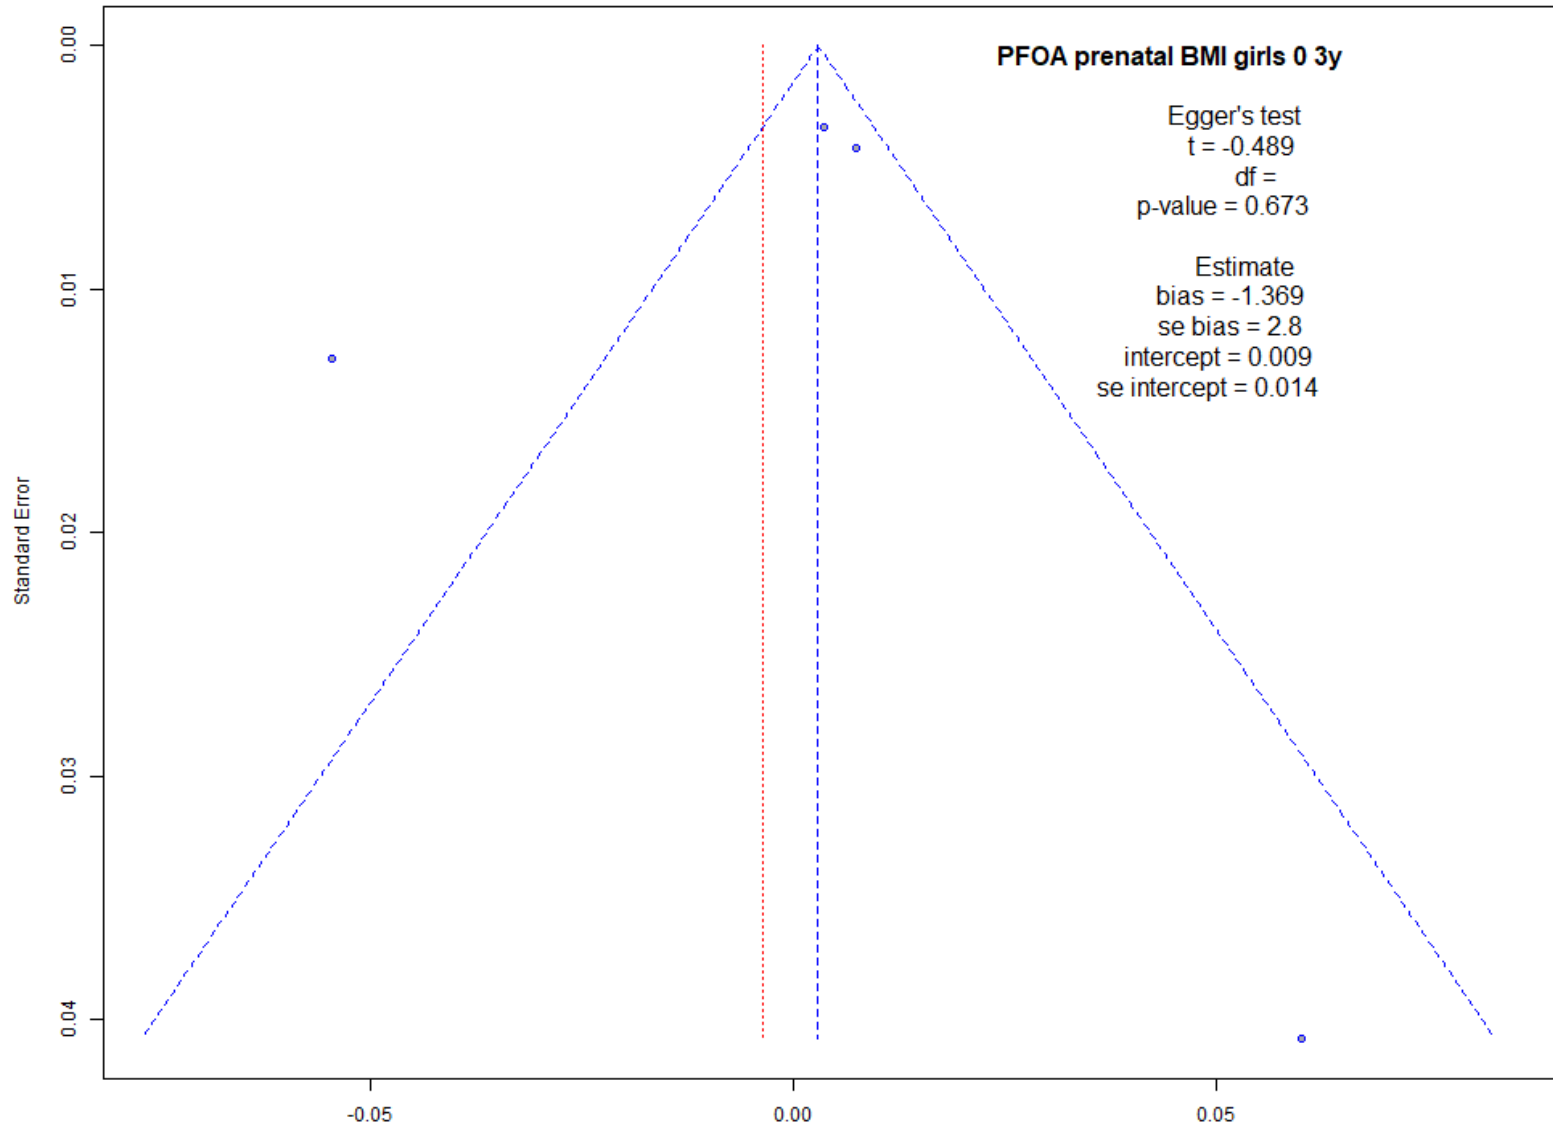

Prenatal and childhood exposure to per-/polyfluoroalkyl substances (PFASs) and its associations with childhood overweight and/or obesity: a systematic review with meta-analyses

Gianfranco Frigerio, Chiara Matilde Ferrari, and Silvia Fustinoni

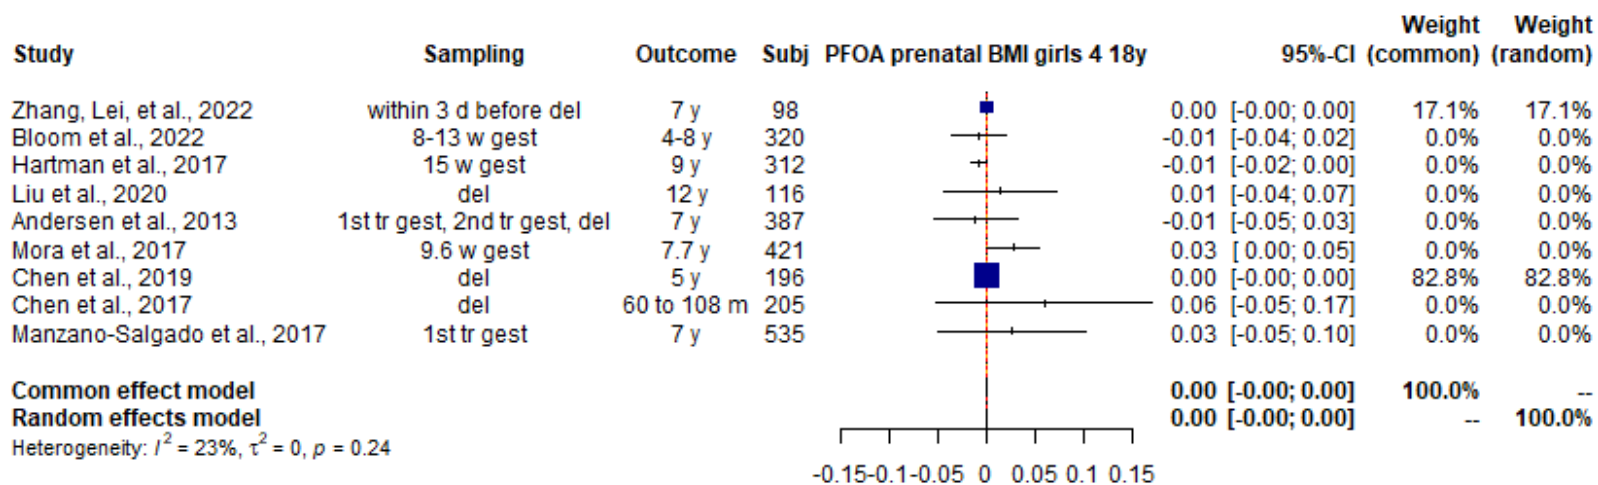

**Prenatal and childhood exposure to per-/polyfluoroalkyl substances (PFASs) and its associations with childhood overweight and/or obesity: a systematic review with meta-analyses**

Gianfranco Frigerio, Chiara Matilde Ferrari, and Silvia Fustinoni

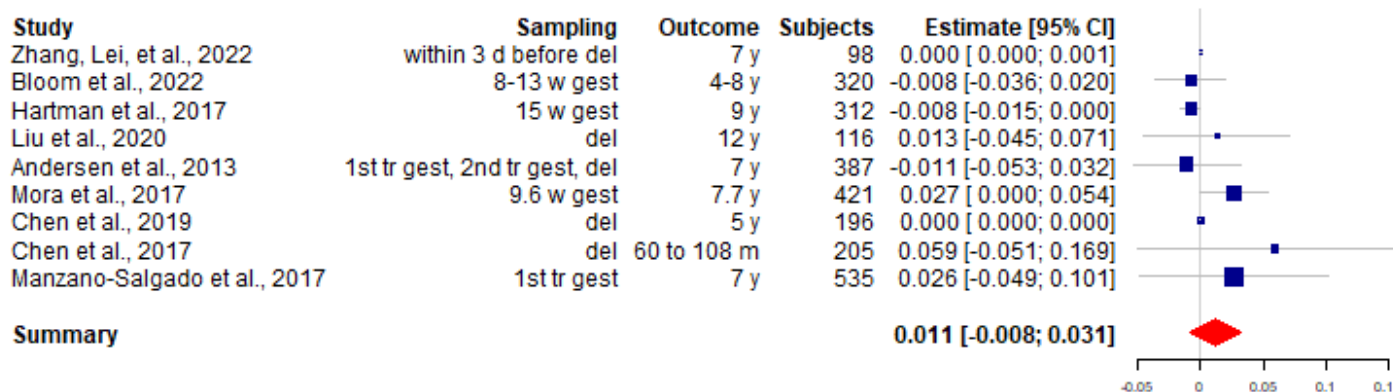



Prenatal and childhood exposure to per-/polyfluoroalkyl substances (PFASs) and its associations with childhood overweight and/or obesity: a systematic review with meta-analyses

Gianfranco Frigerio, Chiara Matilde Ferrari, and Silvia Fustinoni

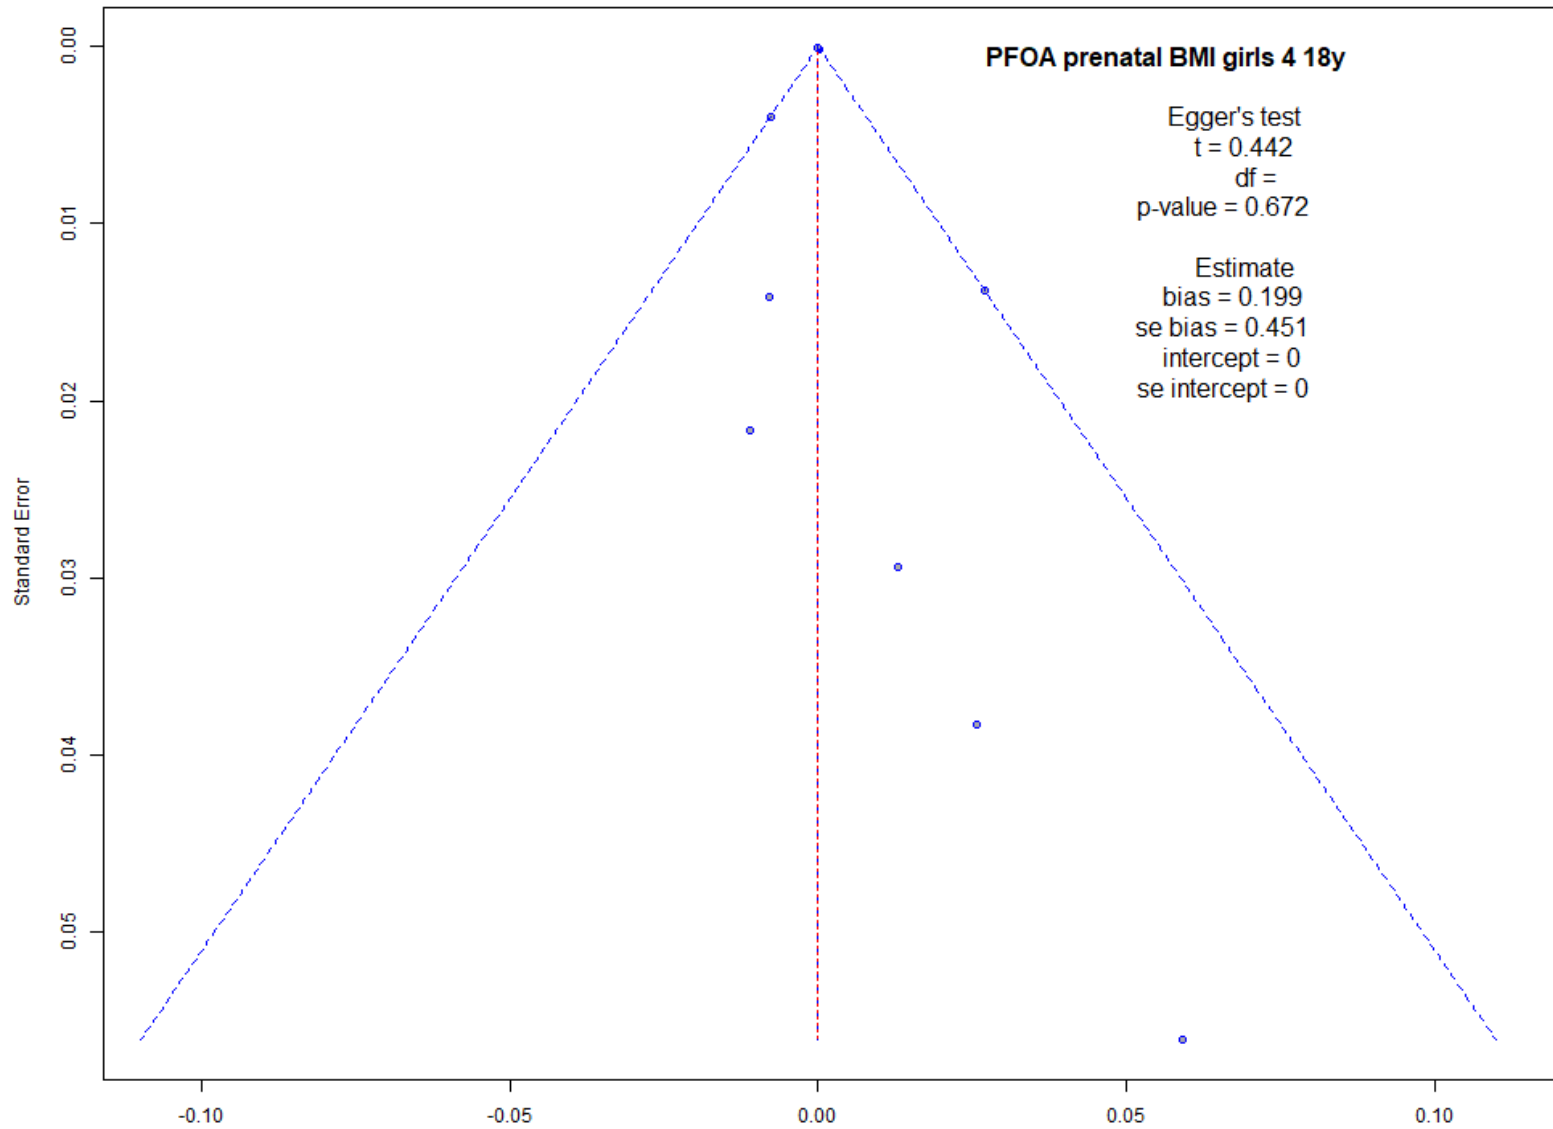

**Prenatal and childhood exposure to per-/polyfluoroalkyl substances (PFASs) and its associations with childhood overweight and/or obesity: a systematic review with meta-analyses**

Gianfranco Frigerio, Chiara Matilde Ferrari, and Silvia Fustinoni

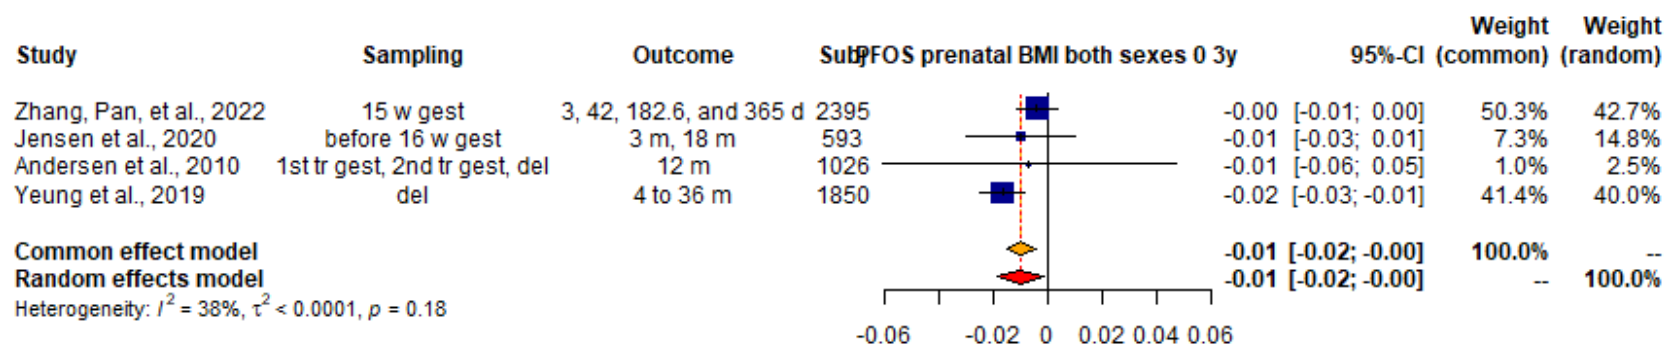

# Prenatal and childhood exposure to per-/polyfluoroalkyl substances (PFASs) and its associations with childhood overweight and/or obesity: a systematic review with meta-analyses

Gianfranco Frigerio, Chiara Matilde Ferrari, and Silvia Fustinoni

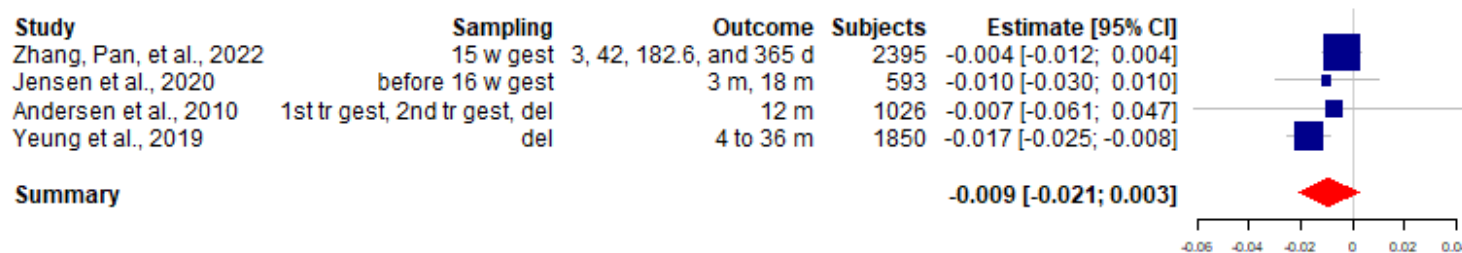

Prenatal and childhood exposure to per-/polyfluoroalkyl substances (PFASs) and its associations with childhood overweight and/or obesity: a systematic review with meta-analyses

Gianfranco Frigerio, Chiara Matilde Ferrari, and Silvia Fustinoni

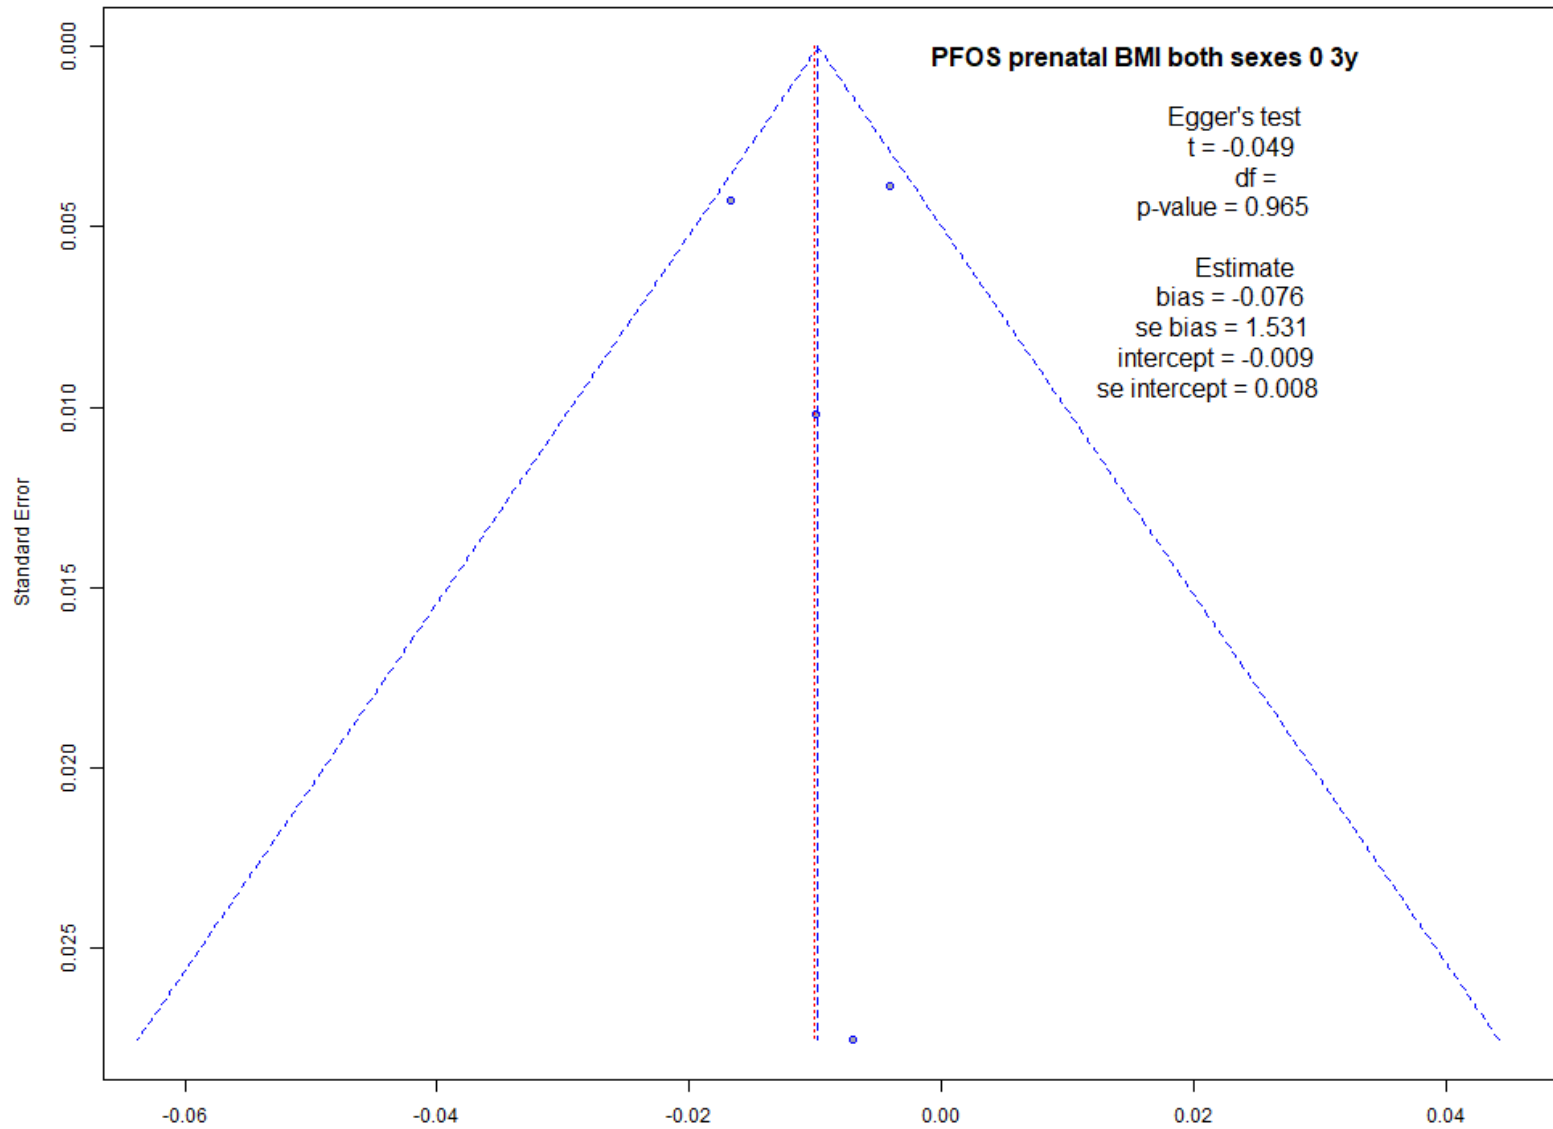

Prenatal and childhood exposure to per-/polyfluoroalkyl substances (PFASs) and its associations with childhood overweight and/or obesity: a systematic review with meta-analyses

Gianfranco Frigerio, Chiara Matilde Ferrari, and Silvia Fustinoni

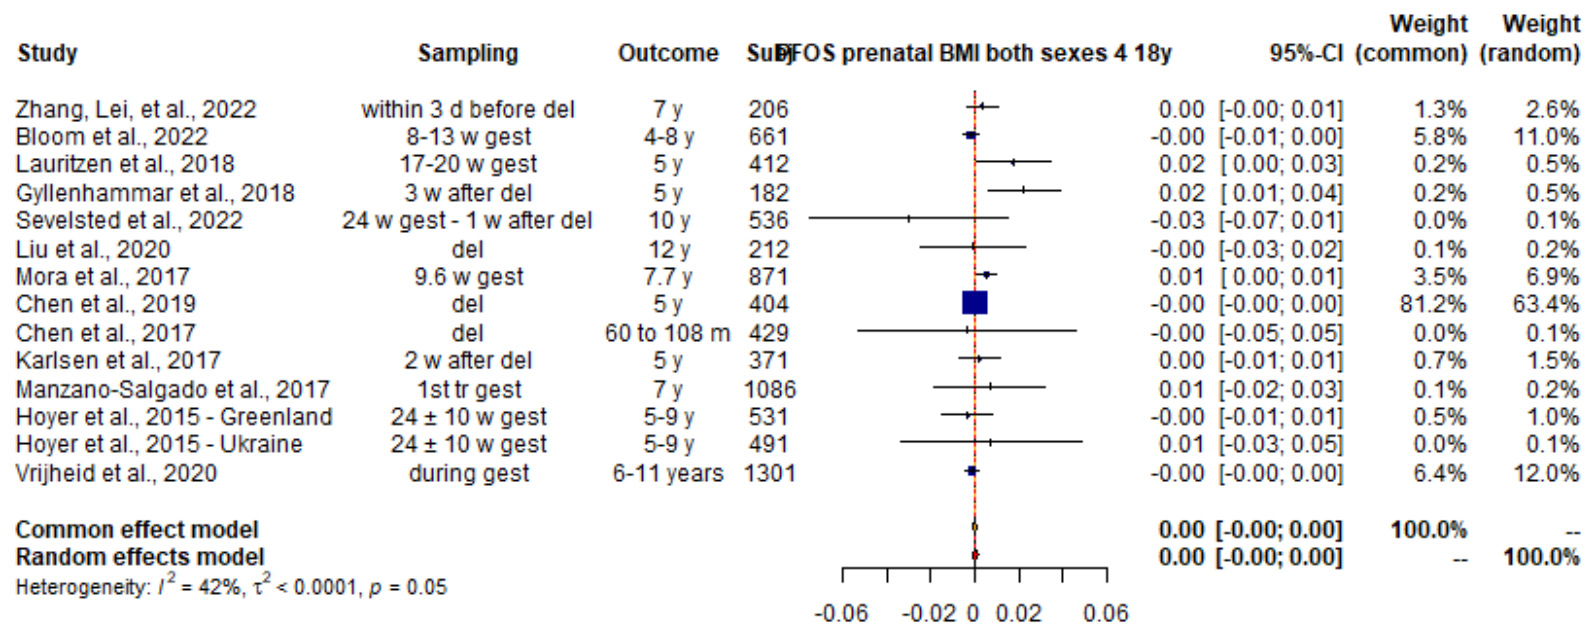

Prenatal and childhood exposure to per-/polyfluoroalkyl substances (PFASs) and its associations with childhood overweight and/or obesity: a systematic review with meta-analyses

Gianfranco Frigerio, Chiara Matilde Ferrari, and Silvia Fustinoni

| Study                          | Sampling                  | Outcome     | Subjects | Estimate [95% CI]            |
|--------------------------------|---------------------------|-------------|----------|------------------------------|
| Zhang, Lei, et al., 2022       | within 3 d before del     | 7 y         | 206      | 0.003 [-0.004; 0.010]        |
| Bloom et al., 2022             | 8-13 w gest               | 4-8 y       | 661      | -0.002 [-0.005; 0.001]       |
| Lauritzen et al., 2018         | 17-20 w gest              | 5 y         | 412      | 0.018 [0.001; 0.035]         |
| Gyllenhammar et al., 2018      | 3 w after del             | 5 y         | 182      | 0.022 [0.006; 0.039]         |
| Sevelsted et al., 2022         | 24 w gest - 1 w after del | 10 y        | 536      | -0.030 [-0.075; 0.015]       |
| Liu et al., 2020               | del                       | 12 y        | 212      | -0.001 [-0.025; 0.023]       |
| Mora et al., 2017              | 9.6 w gest                | 7.7 y       | 871      | 0.005 [0.001; 0.009]         |
| Chen et al., 2019              | del                       | 5 y         | 404      | 0.000 [-0.001; 0.001]        |
| Chen et al., 2017              | del                       | 60 to 108 m | 429      | -0.003 [-0.053; 0.046]       |
| Karlsen et al., 2017           | 2 w after del             | 5 y         | 371      | 0.002 [-0.007; 0.011]        |
| Manzano-Salgado et al., 2017   | 1st tr gest               | 7 y         | 1086     | 0.007 [-0.018; 0.032]        |
| Hoyer et al., 2015 - Greenland | 24 ± 10 w gest            | 5-9 y       | 531      | -0.003 [-0.015; 0.008]       |
| Hoyer et al., 2015 - Ukraine   | 24 ± 10 w gest            | 5-9 y       | 491      | 0.007 [-0.034; 0.048]        |
| Vrijheid et al., 2020          | during gest               | 6-11 years  | 1301     | -0.001 [-0.004; 0.002]       |
| <b>Summary</b>                 |                           |             |          | <b>0.001 [-0.006; 0.007]</b> |

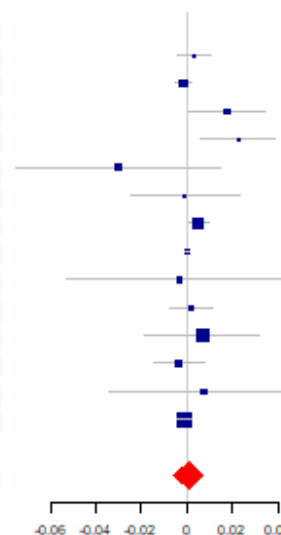

Prenatal and childhood exposure to per-/polyfluoroalkyl substances (PFASs) and its associations with childhood overweight and/or obesity: a systematic review with meta-analyses

Gianfranco Frigerio, Chiara Matilde Ferrari, and Silvia Fustinoni

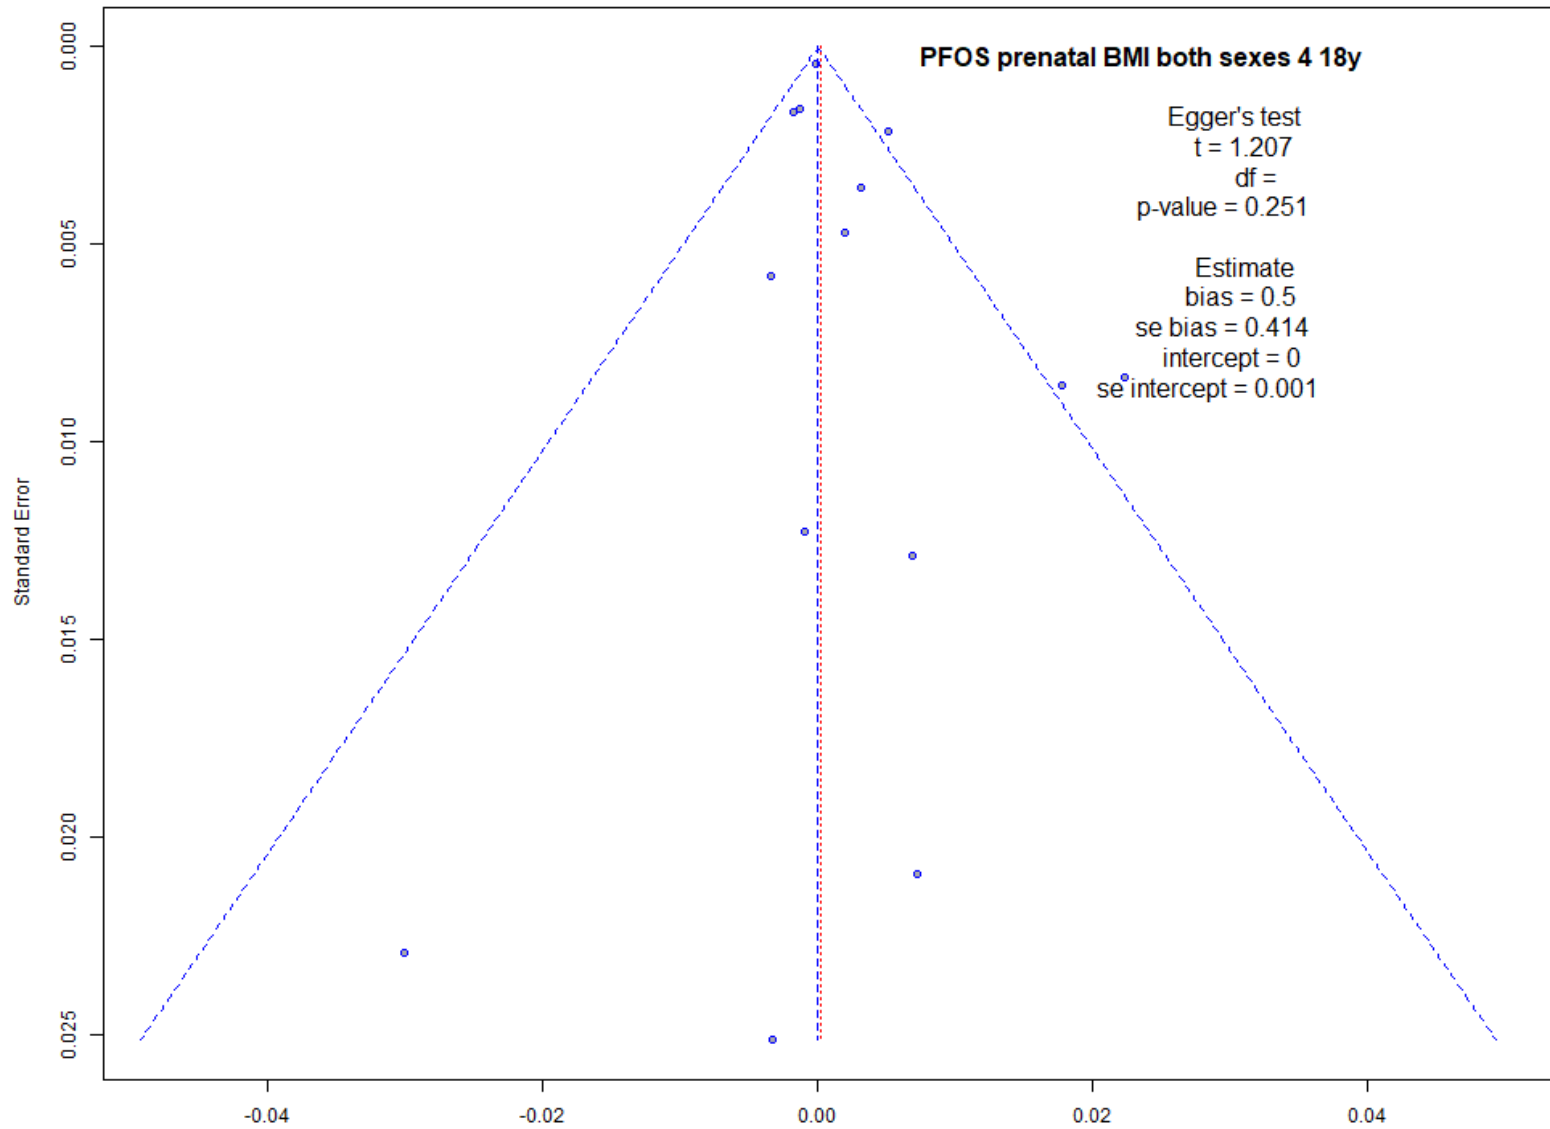

**Prenatal and childhood exposure to per-/polyfluoroalkyl substances (PFASs) and its associations with childhood overweight and/or obesity: a systematic review with meta-analyses**

Gianfranco Frigerio, Chiara Matilde Ferrari, and Silvia Fustinoni

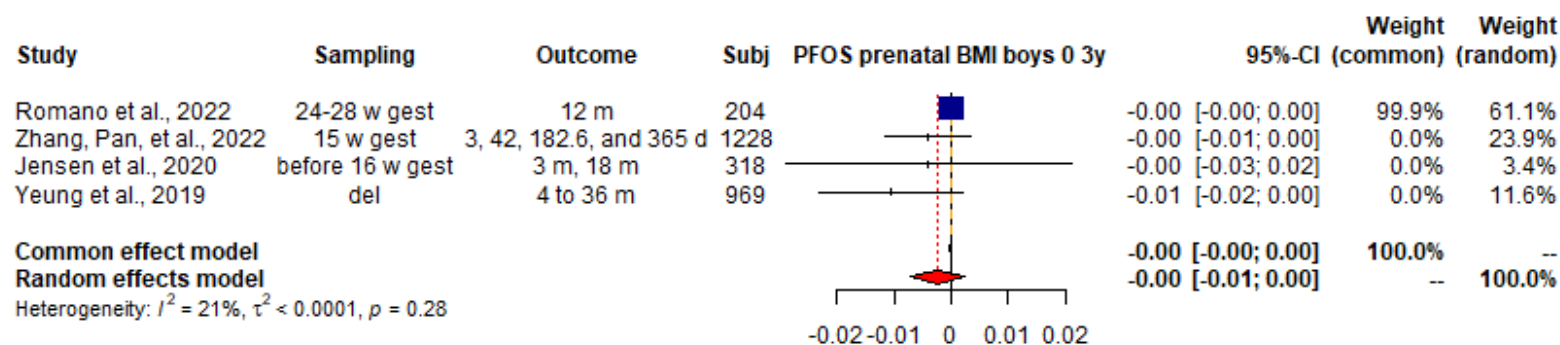



**Prenatal and childhood exposure to per-/polyfluoroalkyl substances (PFASs) and its associations with childhood overweight and/or obesity: a systematic review with meta-analyses**

Gianfranco Frigerio, Chiara Matilde Ferrari, and Silvia Fustinoni

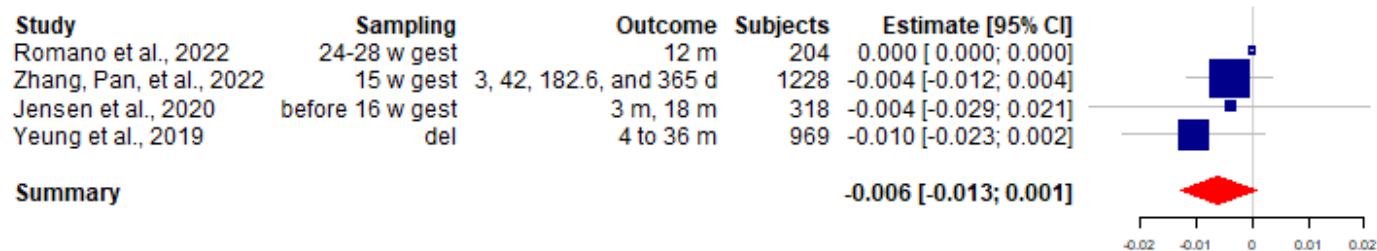

Prenatal and childhood exposure to per-/polyfluoroalkyl substances (PFASs) and its associations with childhood overweight and/or obesity: a systematic review with meta-analyses

Gianfranco Frigerio, Chiara Matilde Ferrari, and Silvia Fustinoni

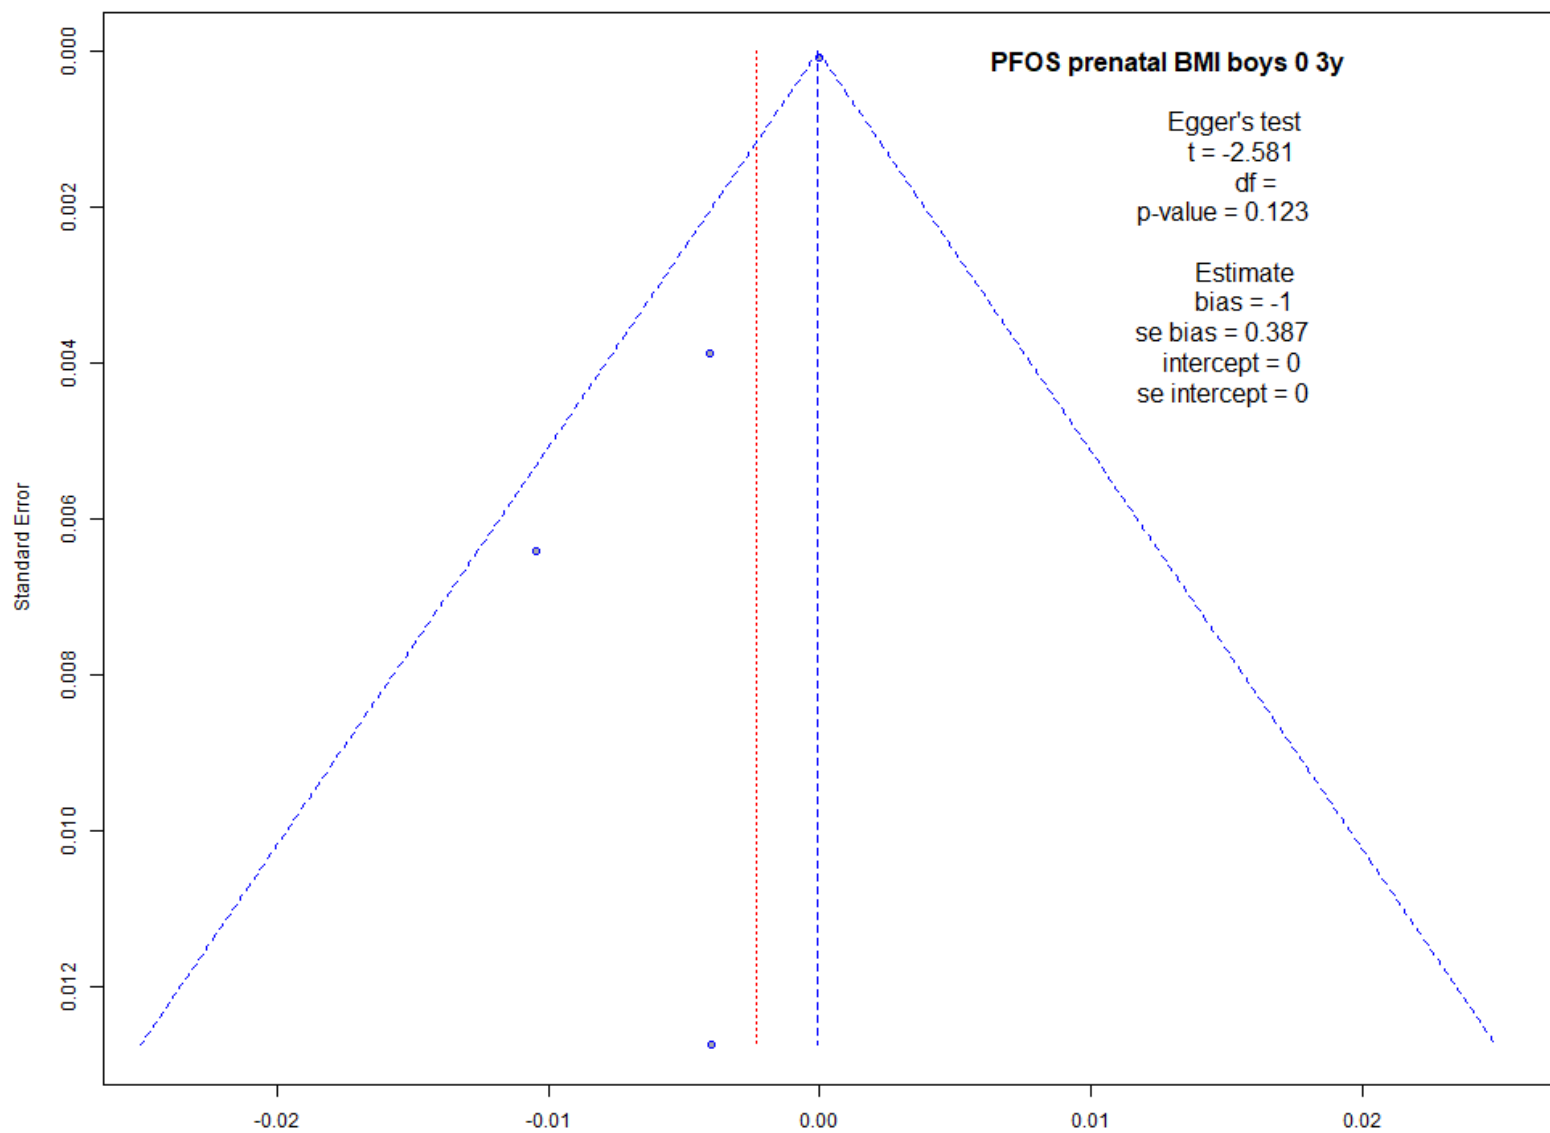

Prenatal and childhood exposure to per-/polyfluoroalkyl substances (PFASs) and its associations with childhood overweight and/or obesity: a systematic review with meta-analyses

Gianfranco Frigerio, Chiara Matilde Ferrari, and Silvia Fustinoni

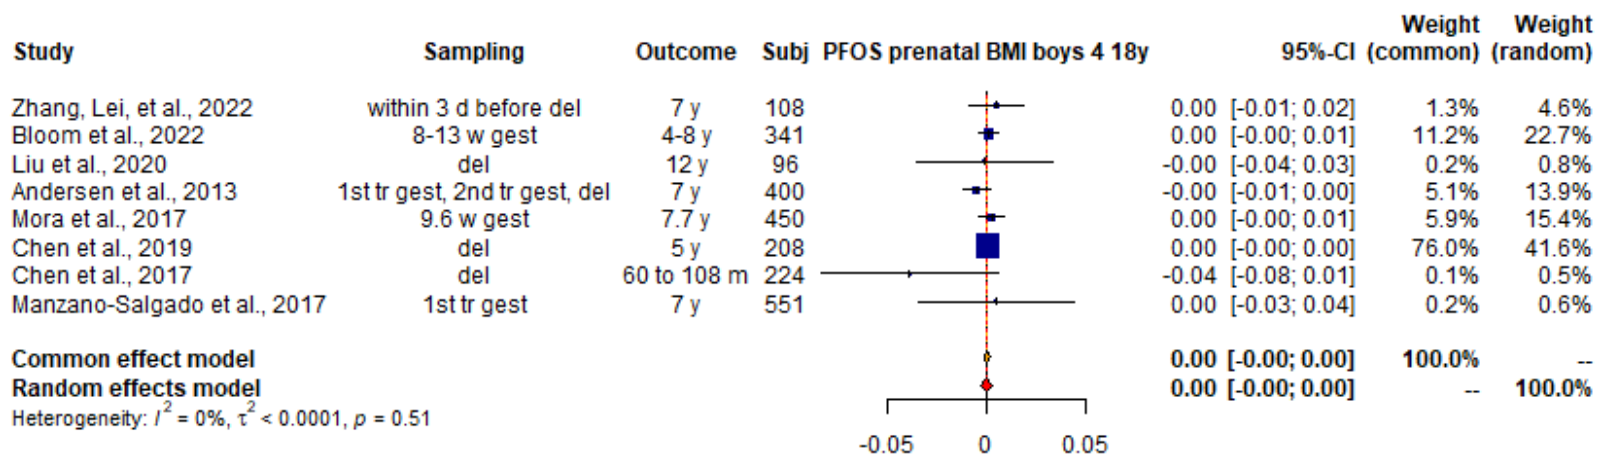

# Prenatal and childhood exposure to per-/polyfluoroalkyl substances (PFASs) and its associations with childhood overweight and/or obesity: a systematic review with meta-analyses

Gianfranco Frigerio, Chiara Matilde Ferrari, and Silvia Fustinoni

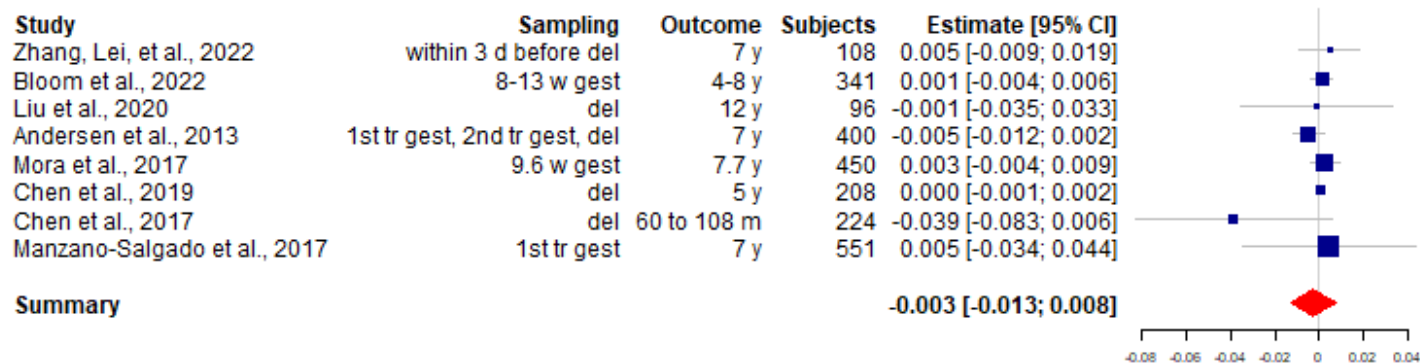

Prenatal and childhood exposure to per-/polyfluoroalkyl substances (PFASs) and its associations with childhood overweight and/or obesity: a systematic review with meta-analyses

Gianfranco Frigerio, Chiara Matilde Ferrari, and Silvia Fustinoni

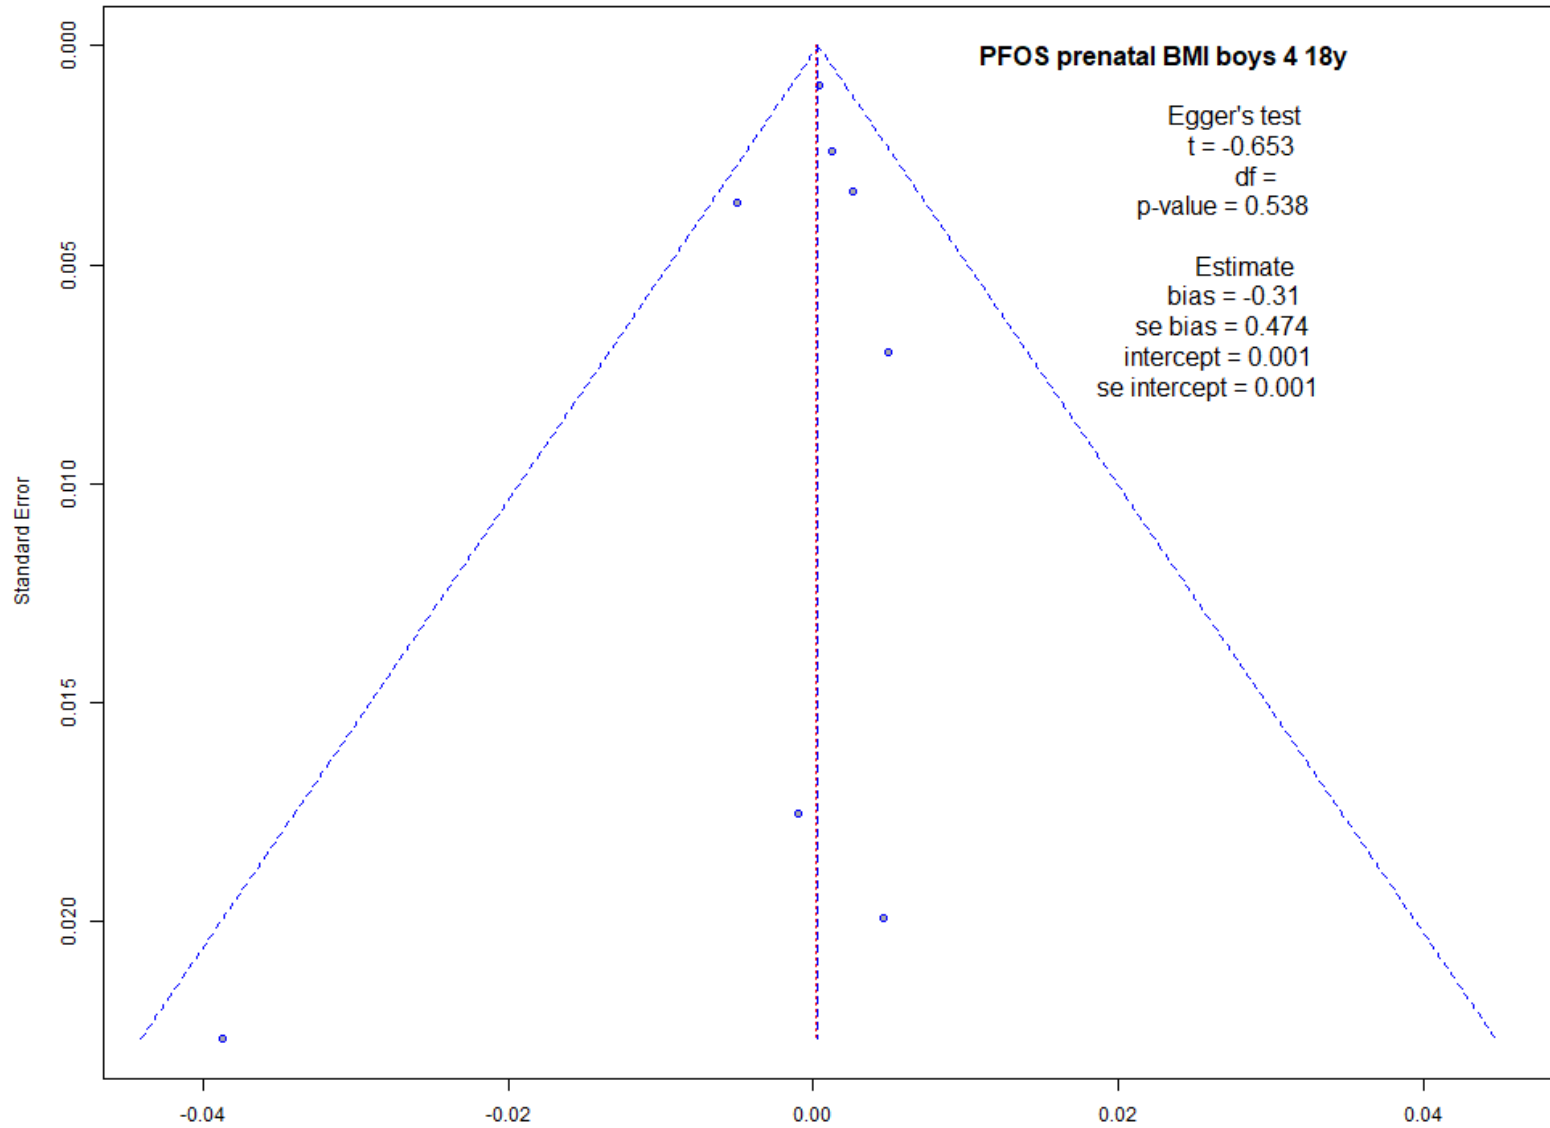

**Prenatal and childhood exposure to per-/polyfluoroalkyl substances (PFASs) and its associations with childhood overweight and/or obesity: a systematic review with meta-analyses**

Gianfranco Frigerio, Chiara Matilde Ferrari, and Silvia Fustinoni

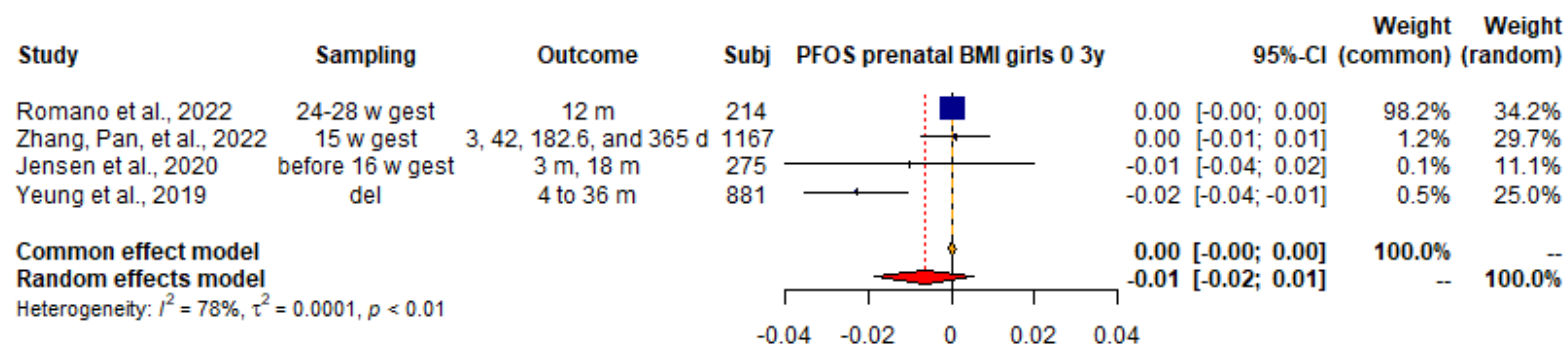

**Prenatal and childhood exposure to per-/polyfluoroalkyl substances (PFASs) and its associations with childhood overweight and/or obesity: a systematic review with meta-analyses**

Gianfranco Frigerio, Chiara Matilde Ferrari, and Silvia Fustinoni

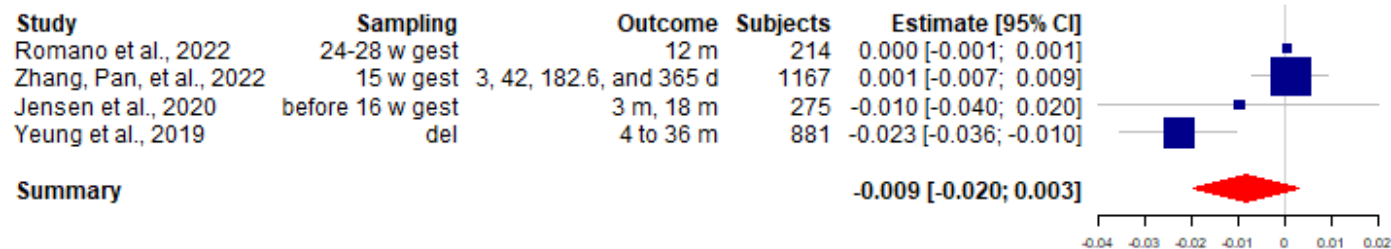

Prenatal and childhood exposure to per-/polyfluoroalkyl substances (PFASs) and its associations with childhood overweight and/or obesity: a systematic review with meta-analyses

Gianfranco Frigerio, Chiara Matilde Ferrari, and Silvia Fustinoni

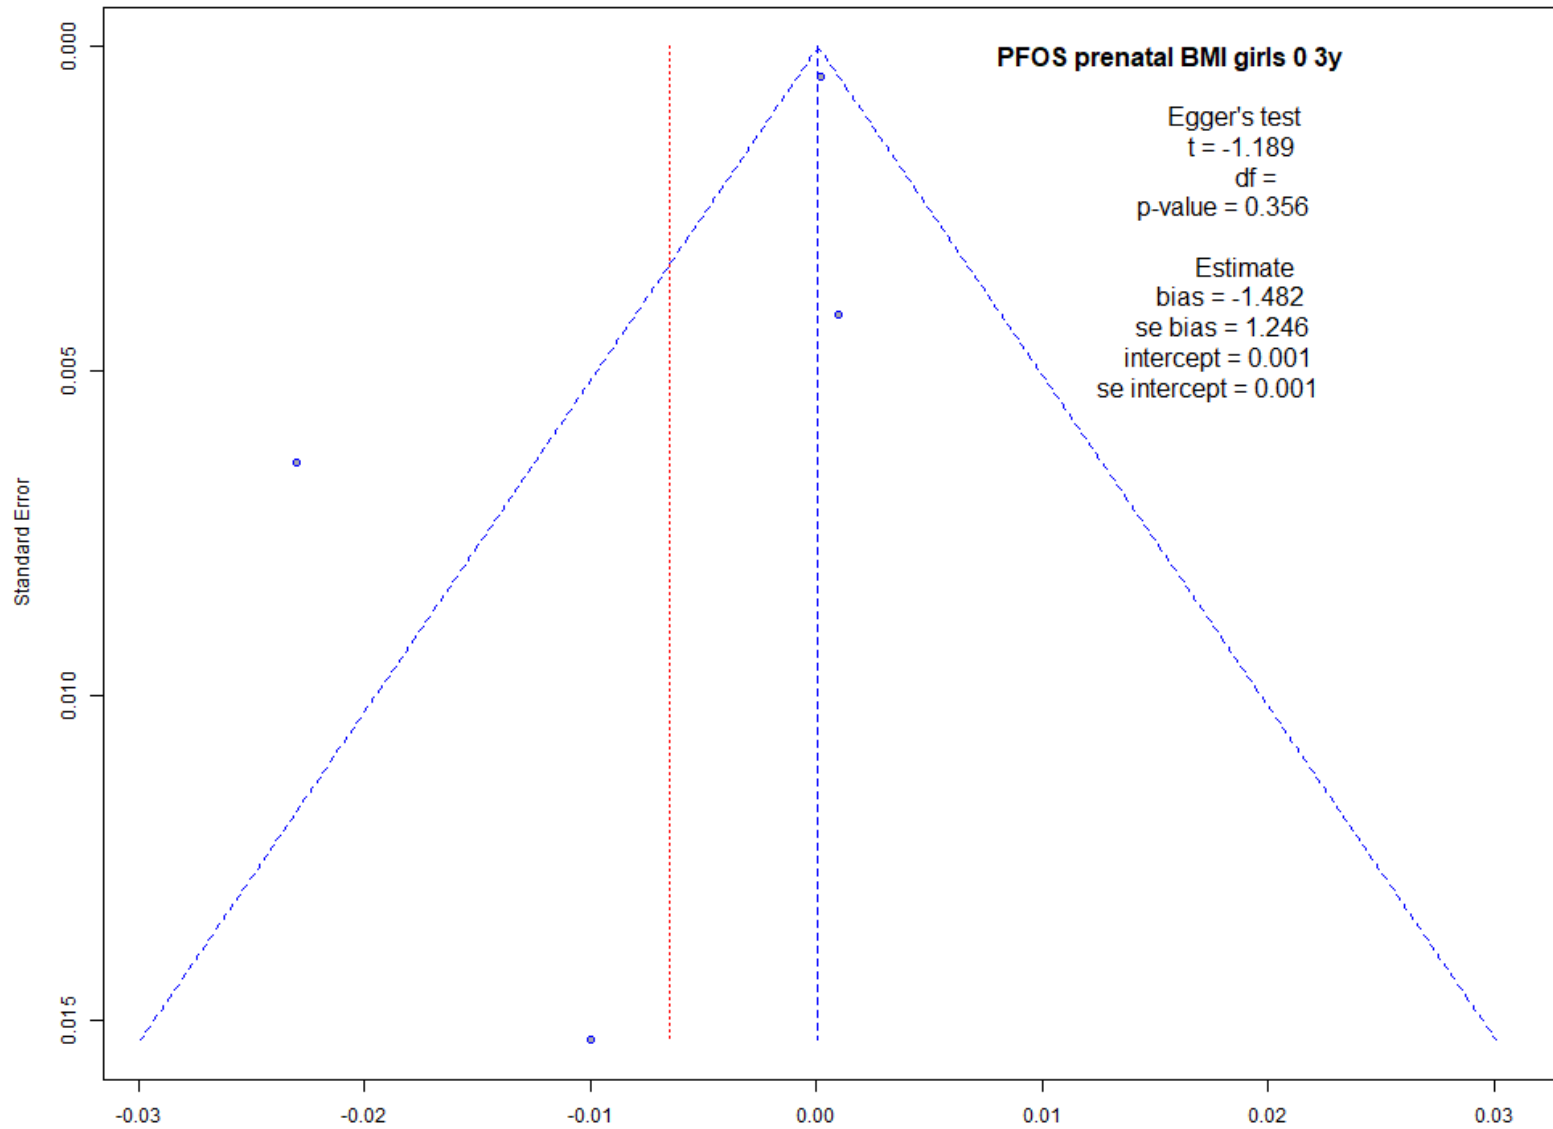



Prenatal and childhood exposure to per-/polyfluoroalkyl substances (PFASs) and its associations with childhood overweight and/or obesity: a systematic review with meta-analyses

Gianfranco Frigerio, Chiara Matilde Ferrari, and Silvia Fustinoni

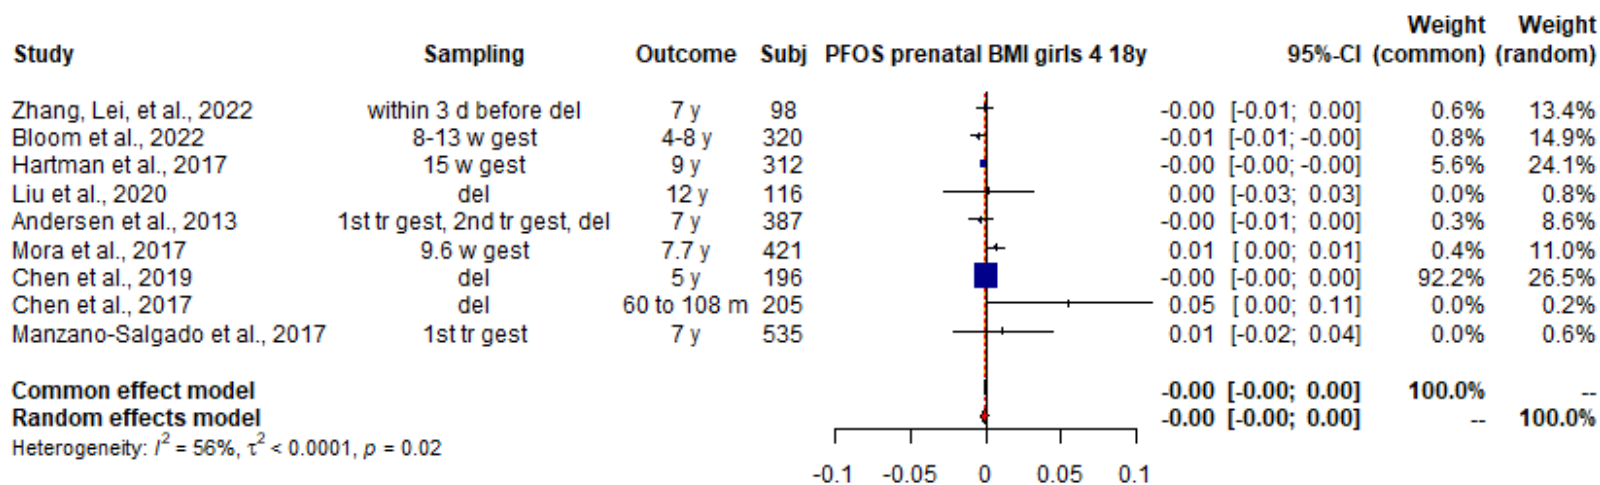

**Prenatal and childhood exposure to per-/polyfluoroalkyl substances (PFASs) and its associations with childhood overweight and/or obesity: a systematic review with meta-analyses**

Gianfranco Frigerio, Chiara Matilde Ferrari, and Silvia Fustinoni

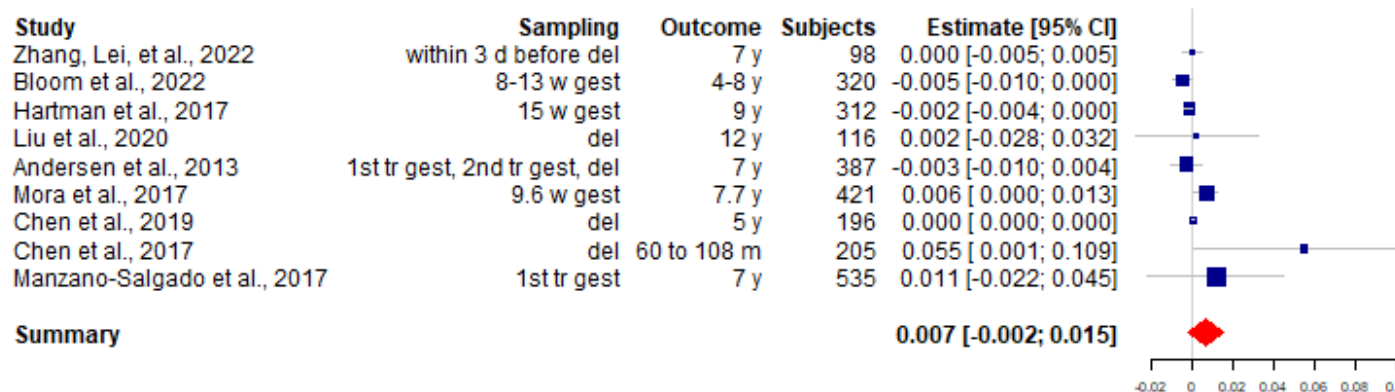

Prenatal and childhood exposure to per-/polyfluoroalkyl substances (PFASs) and its associations with childhood overweight and/or obesity: a systematic review with meta-analyses

Gianfranco Frigerio, Chiara Matilde Ferrari, and Silvia Fustinoni

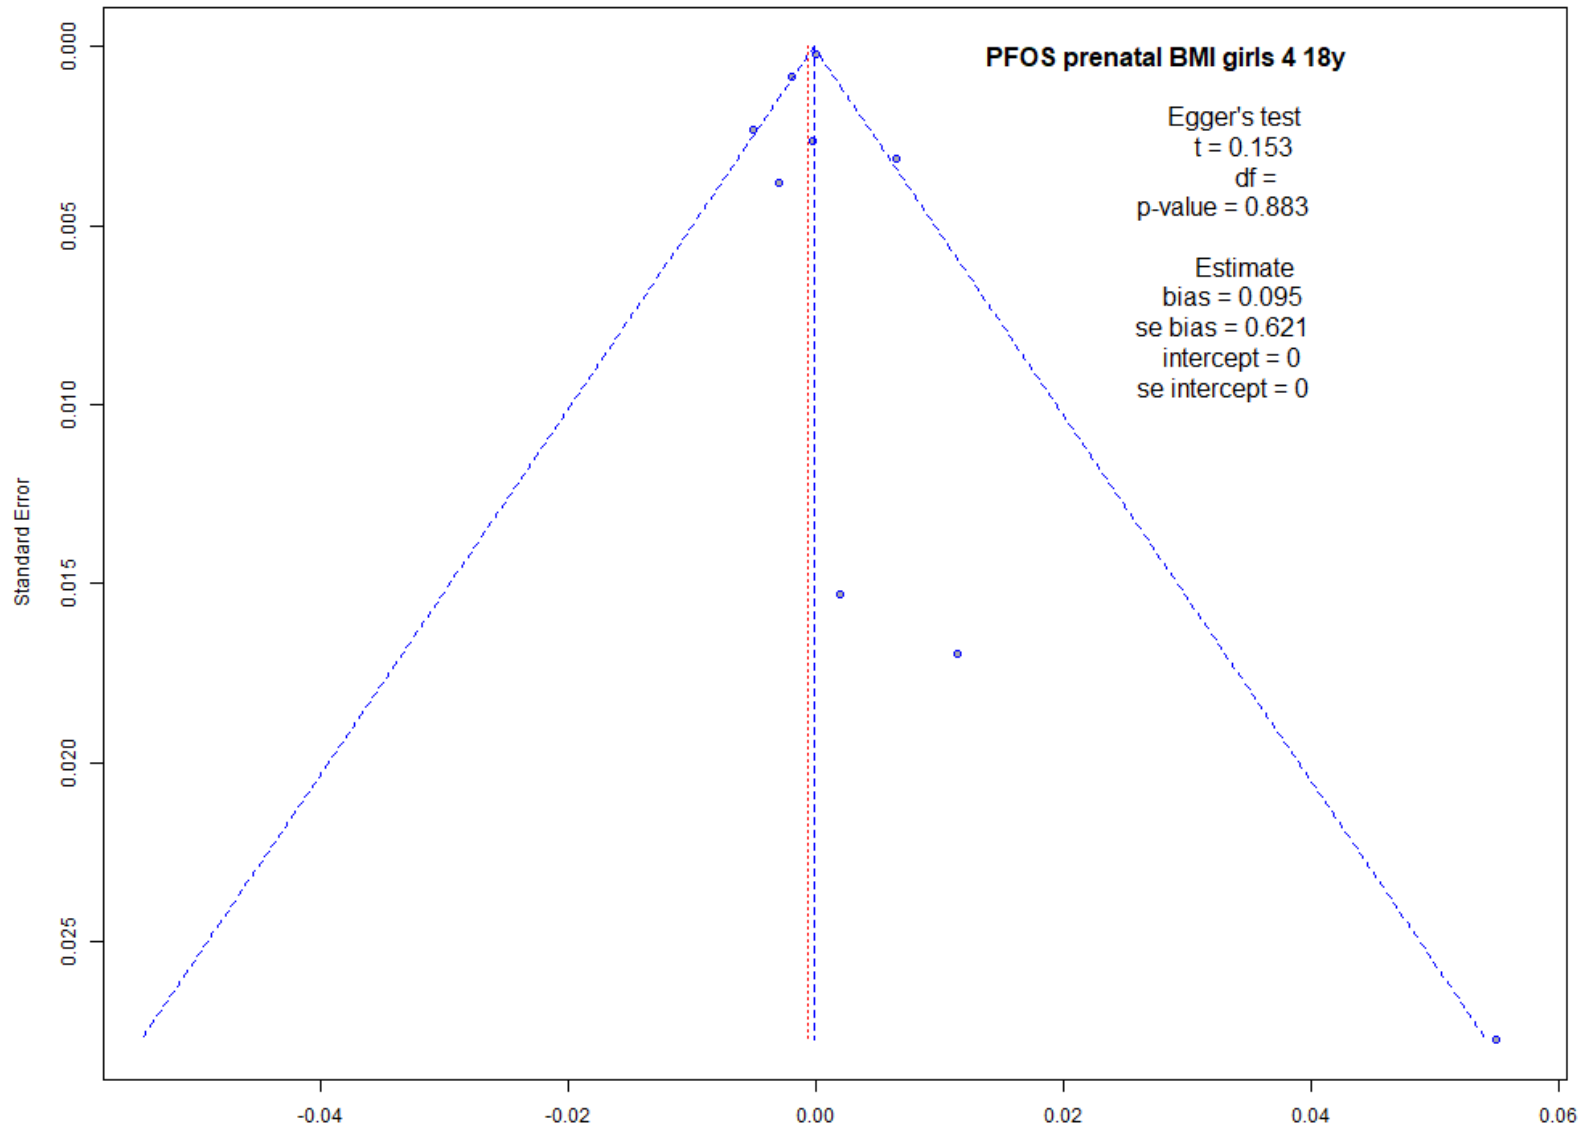

# Prenatal and childhood exposure to per-/polyfluoroalkyl substances (PFASs) and its associations with childhood overweight and/or obesity: a systematic review with meta-analyses

Gianfranco Frigerio, Chiara Matilde Ferrari, and Silvia Fustinoni

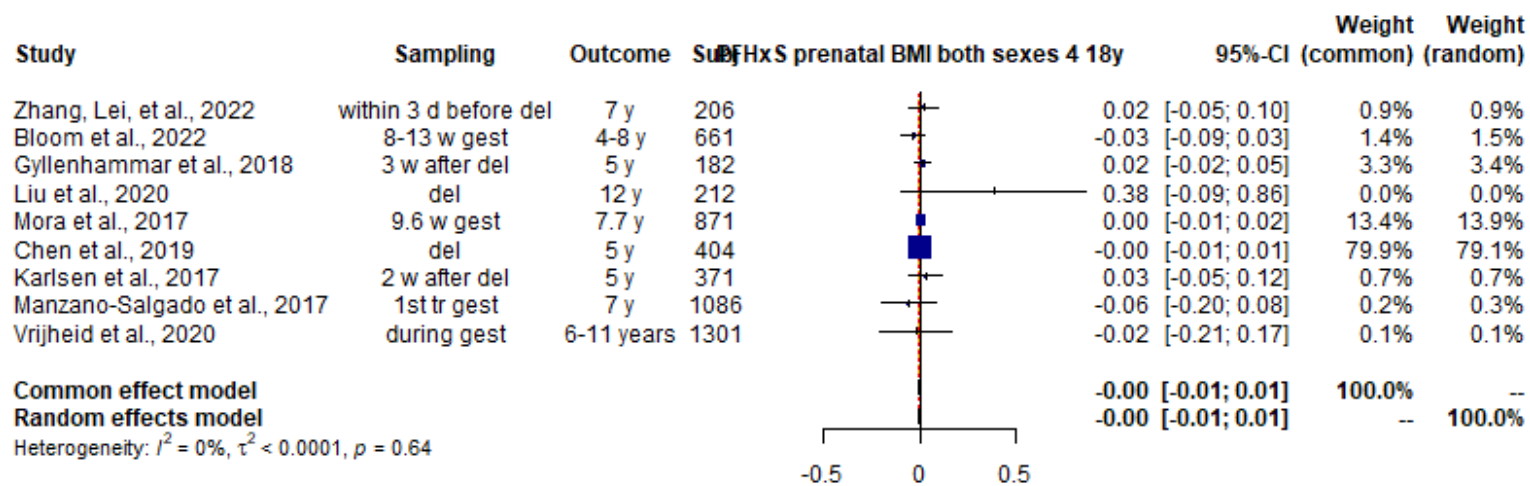

# Prenatal and childhood exposure to per-/polyfluoroalkyl substances (PFASs) and its associations with childhood overweight and/or obesity: a systematic review with meta-analyses

Gianfranco Frigerio, Chiara Matilde Ferrari, and Silvia Fustinoni

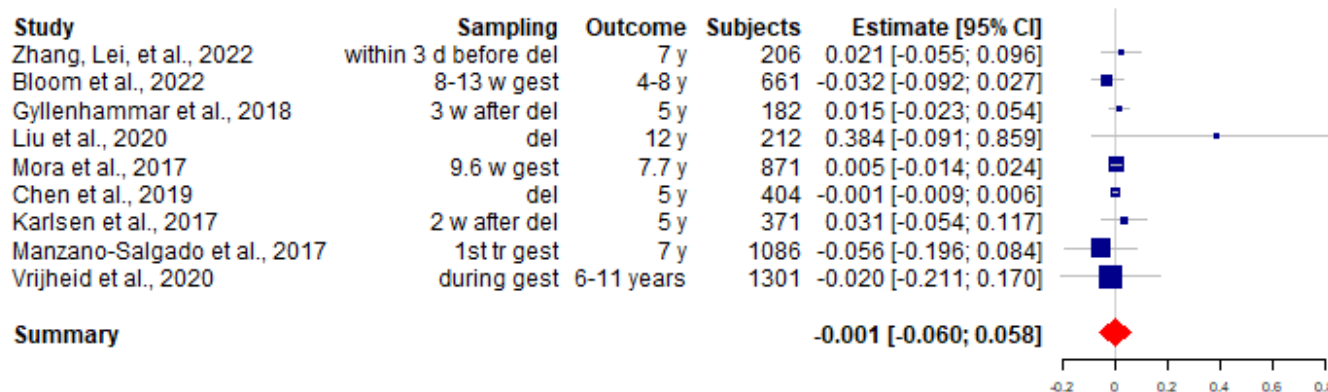

Prenatal and childhood exposure to per-/polyfluoroalkyl substances (PFASs) and its associations with childhood overweight and/or obesity: a systematic review with meta-analyses

Gianfranco Frigerio, Chiara Matilde Ferrari, and Silvia Fustinoni

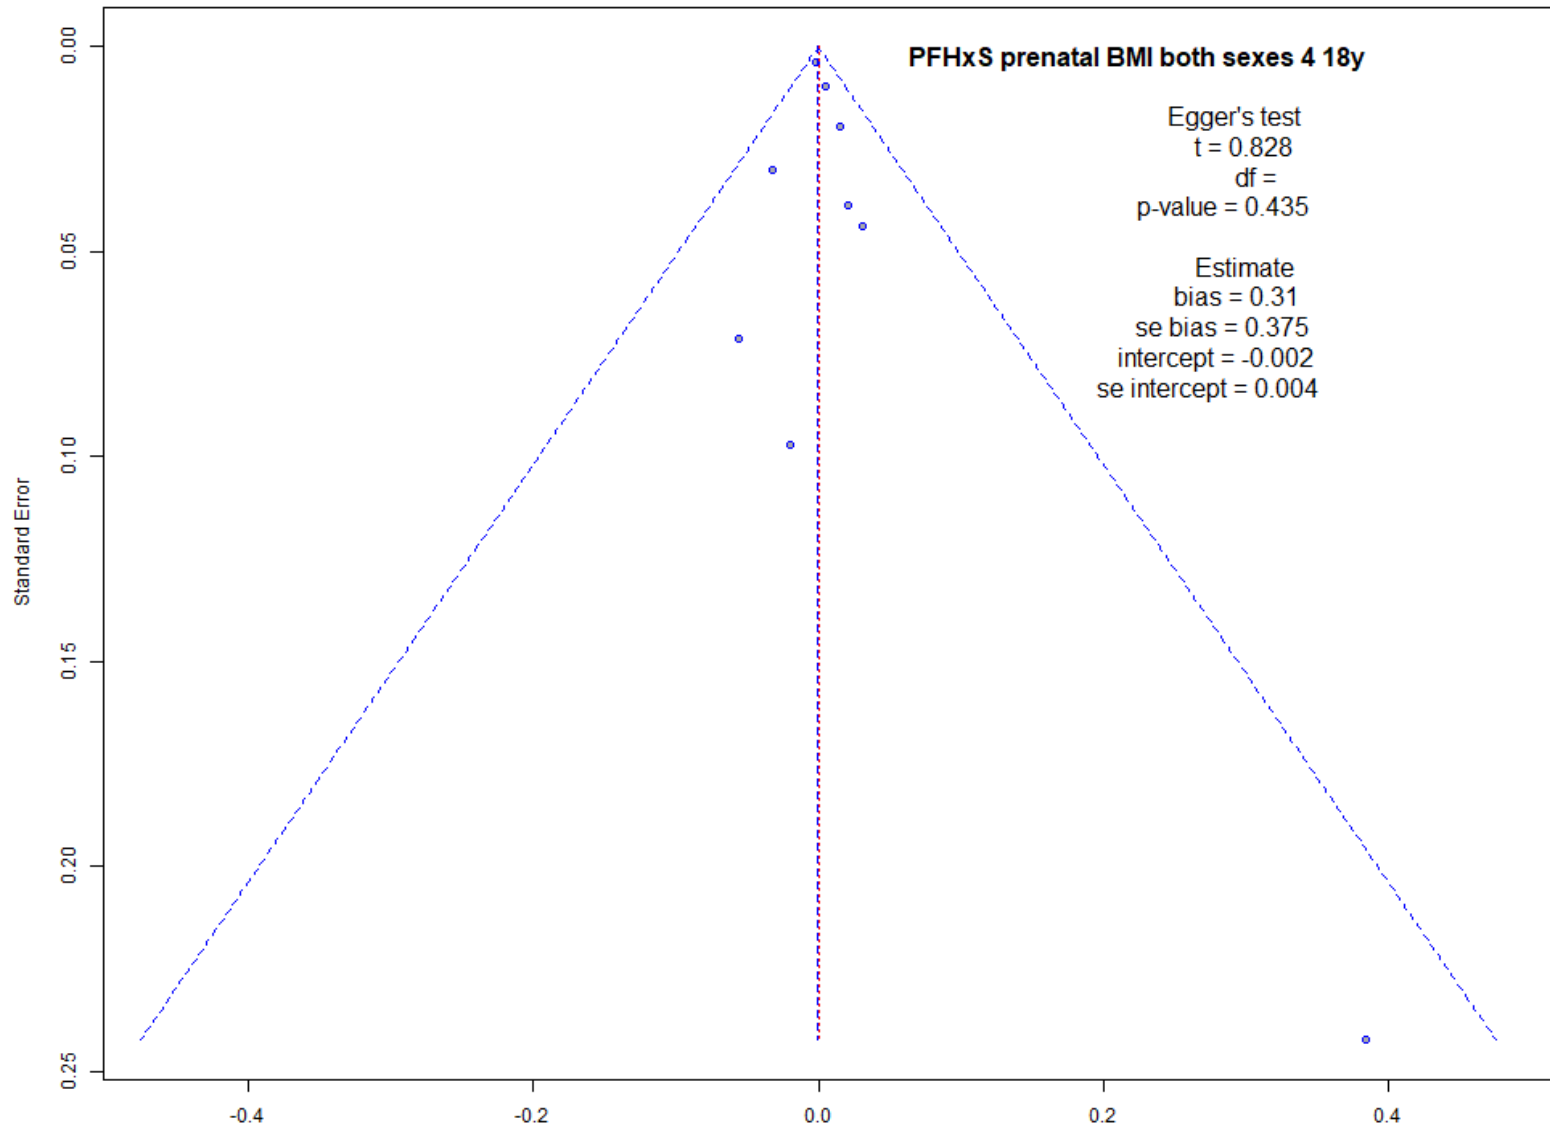

**Prenatal and childhood exposure to per-/polyfluoroalkyl substances (PFASs) and its associations with childhood overweight and/or obesity: a systematic review with meta-analyses**

Gianfranco Frigerio, Chiara Matilde Ferrari, and Silvia Fustinoni

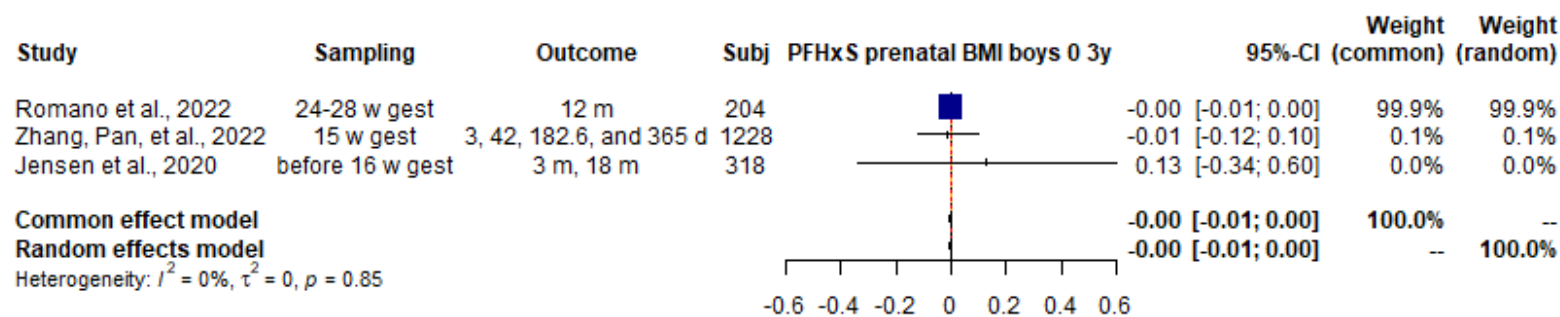

**Prenatal and childhood exposure to per-/polyfluoroalkyl substances (PFASs) and its associations with childhood overweight and/or obesity: a systematic review with meta-analyses**

Gianfranco Frigerio, Chiara Matilde Ferrari, and Silvia Fustinoni

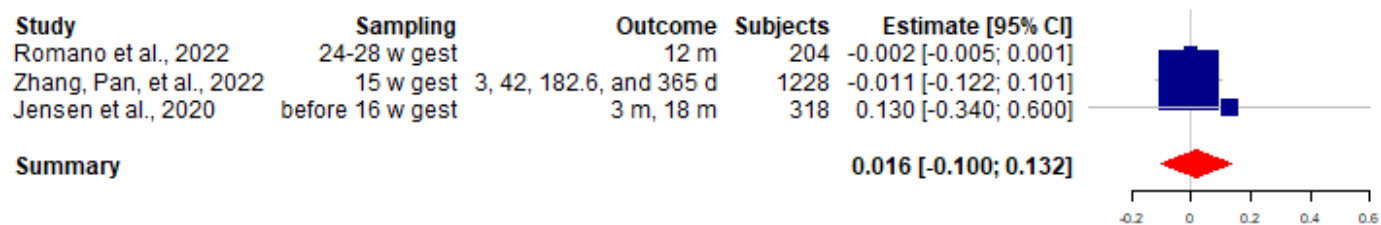



Prenatal and childhood exposure to per-/polyfluoroalkyl substances (PFASs) and its associations with childhood overweight and/or obesity: a systematic review with meta-analyses

Gianfranco Frigerio, Chiara Matilde Ferrari, and Silvia Fustinoni

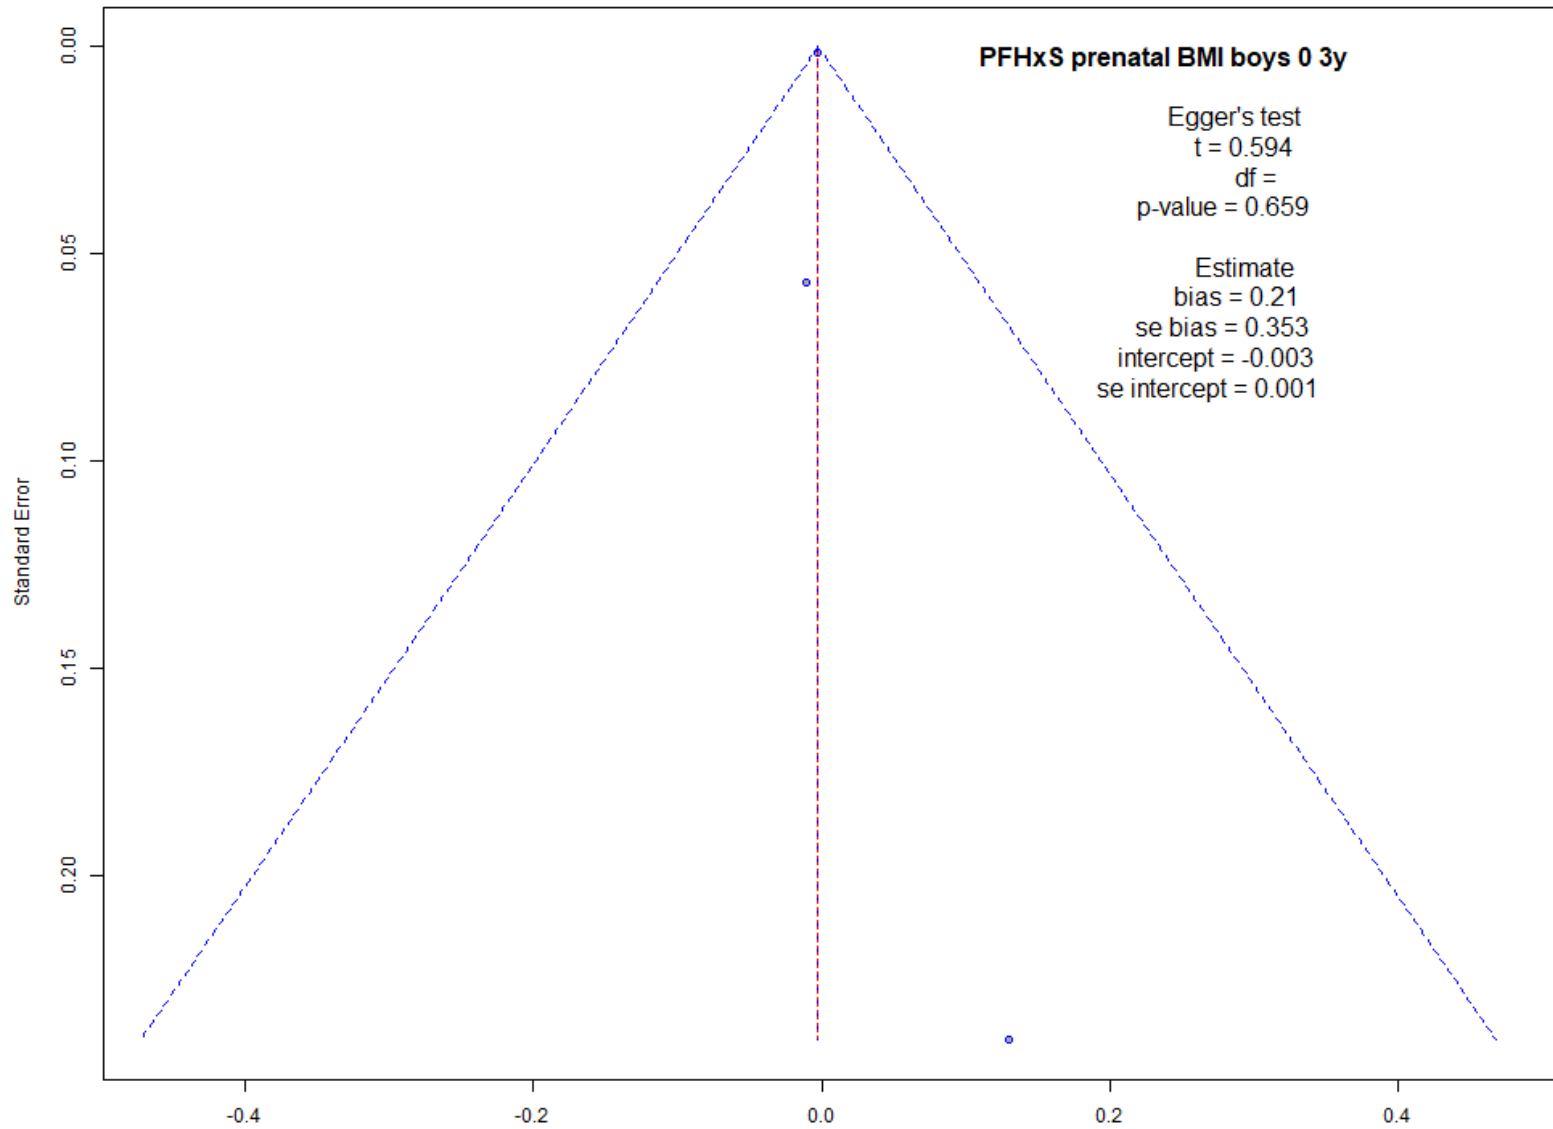

# Prenatal and childhood exposure to per-/polyfluoroalkyl substances (PFASs) and its associations with childhood overweight and/or obesity: a systematic review with meta-analyses

Gianfranco Frigerio, Chiara Matilde Ferrari, and Silvia Fustinoni

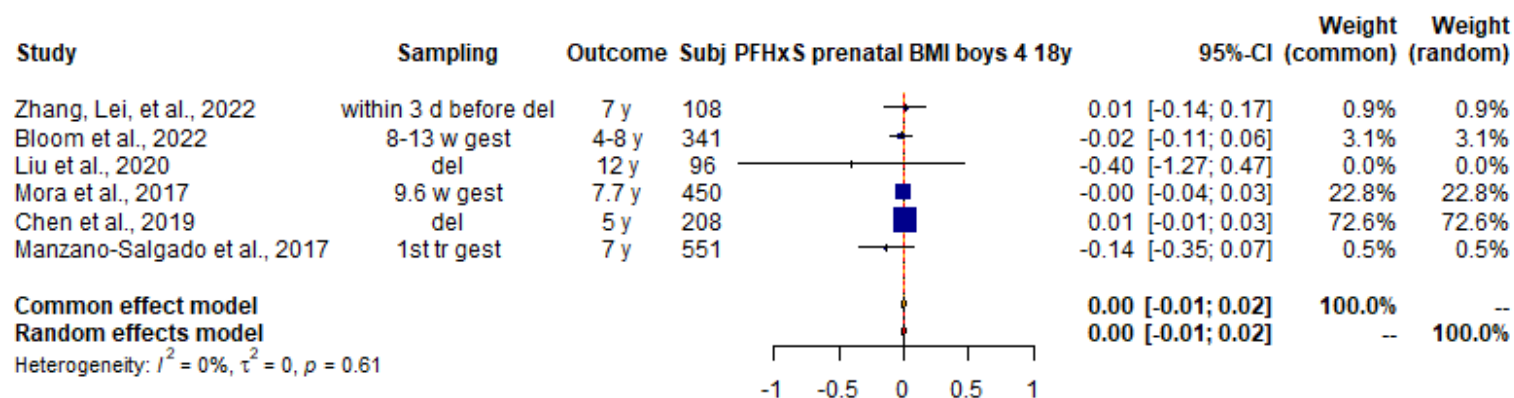

**Prenatal and childhood exposure to per-/polyfluoroalkyl substances (PFASs) and its associations with childhood overweight and/or obesity: a systematic review with meta-analyses**

Gianfranco Frigerio, Chiara Matilde Ferrari, and Silvia Fustinoni

| Study                        | Sampling              | Outcome | Subjects | Estimate [95% CI]             |
|------------------------------|-----------------------|---------|----------|-------------------------------|
| Zhang, Lei, et al., 2022     | within 3 d before del | 7 y     | 108      | 0.014 [-0.143; 0.172]         |
| Bloom et al., 2022           | 8-13 w gest           | 4-8 y   | 341      | -0.022 [-0.105; 0.062]        |
| Liu et al., 2020             | del                   | 12 y    | 96       | -0.401 [-1.274; 0.472]        |
| Mora et al., 2017            | 9.6 w gest            | 7.7 y   | 450      | -0.005 [-0.036; 0.026]        |
| Chen et al., 2019            | del                   | 5 y     | 208      | 0.009 [-0.008; 0.026]         |
| Manzano-Salgado et al., 2017 | 1st tr gest           | 7 y     | 551      | -0.140 [-0.350; 0.070]        |
| <b>Summary</b>               |                       |         |          | <b>-0.069 [-0.153; 0.015]</b> |

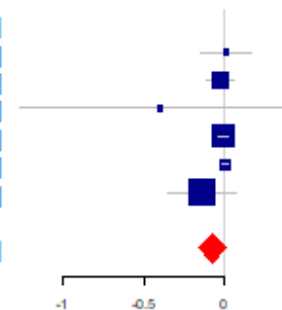

Prenatal and childhood exposure to per-/polyfluoroalkyl substances (PFASs) and its associations with childhood overweight and/or obesity: a systematic review with meta-analyses

Gianfranco Frigerio, Chiara Matilde Ferrari, and Silvia Fustinoni

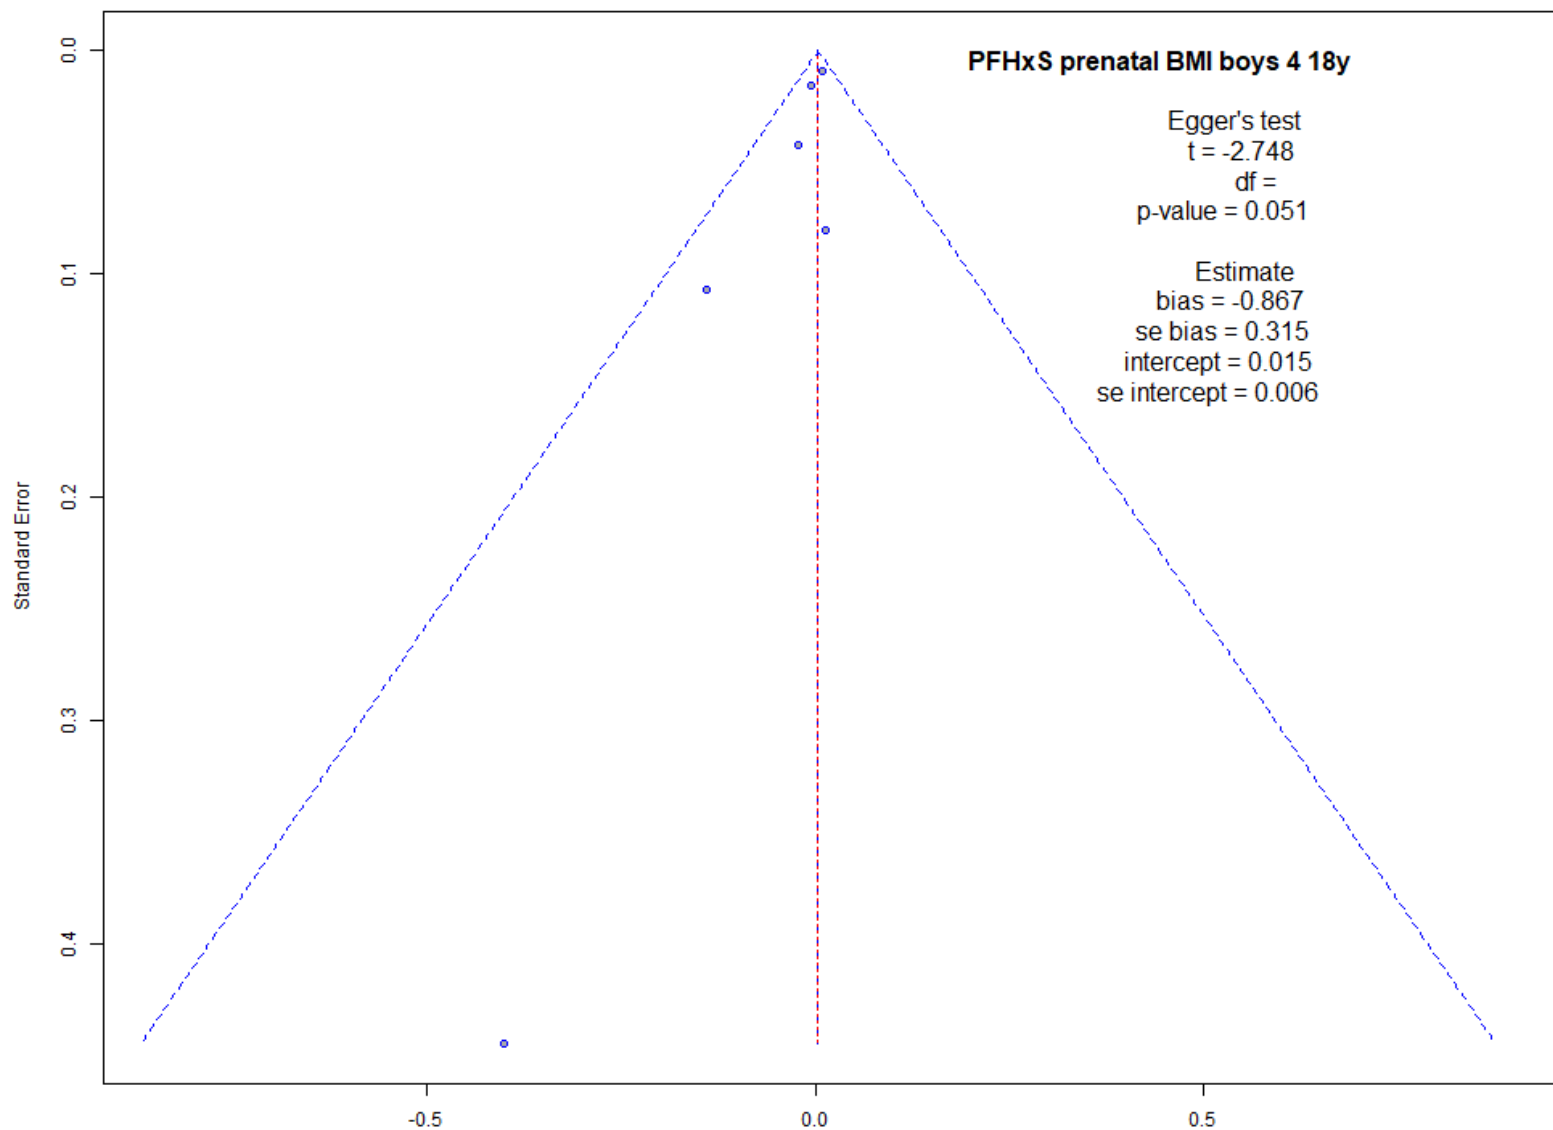

**Prenatal and childhood exposure to per-/polyfluoroalkyl substances (PFASs) and its associations with childhood overweight and/or obesity: a systematic review with meta-analyses**

Gianfranco Frigerio, Chiara Matilde Ferrari, and Silvia Fustinoni

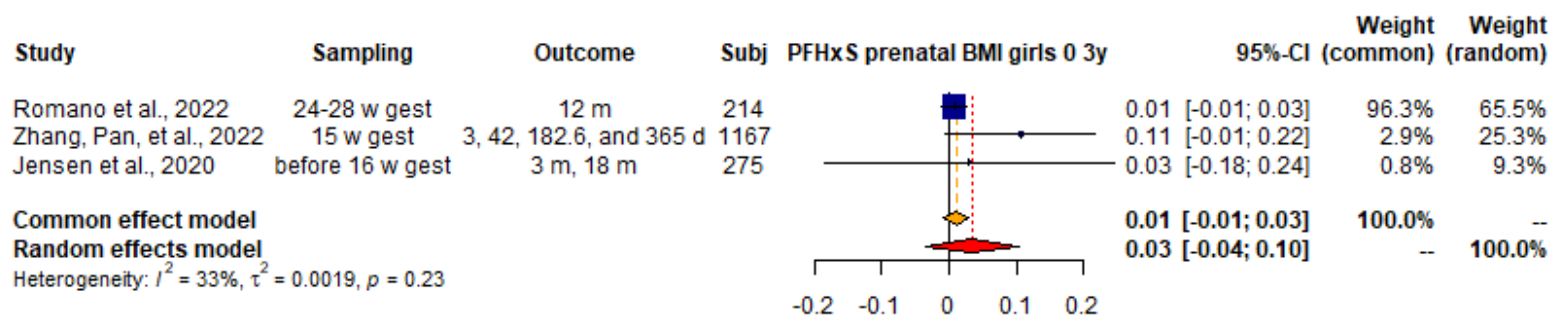

**Prenatal and childhood exposure to per-/polyfluoroalkyl substances (PFASs) and its associations with childhood overweight and/or obesity: a systematic review with meta-analyses**

Gianfranco Frigerio, Chiara Matilde Ferrari, and Silvia Fustinoni

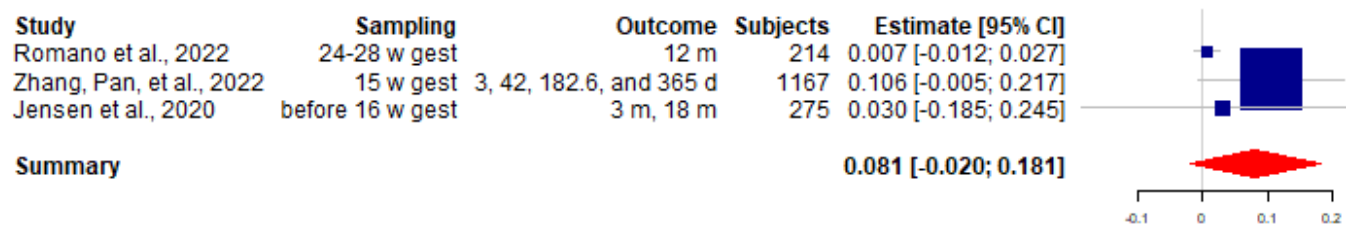

Prenatal and childhood exposure to per-/polyfluoroalkyl substances (PFASs) and its associations with childhood overweight and/or obesity: a systematic review with meta-analyses

Gianfranco Frigerio, Chiara Matilde Ferrari, and Silvia Fustinoni

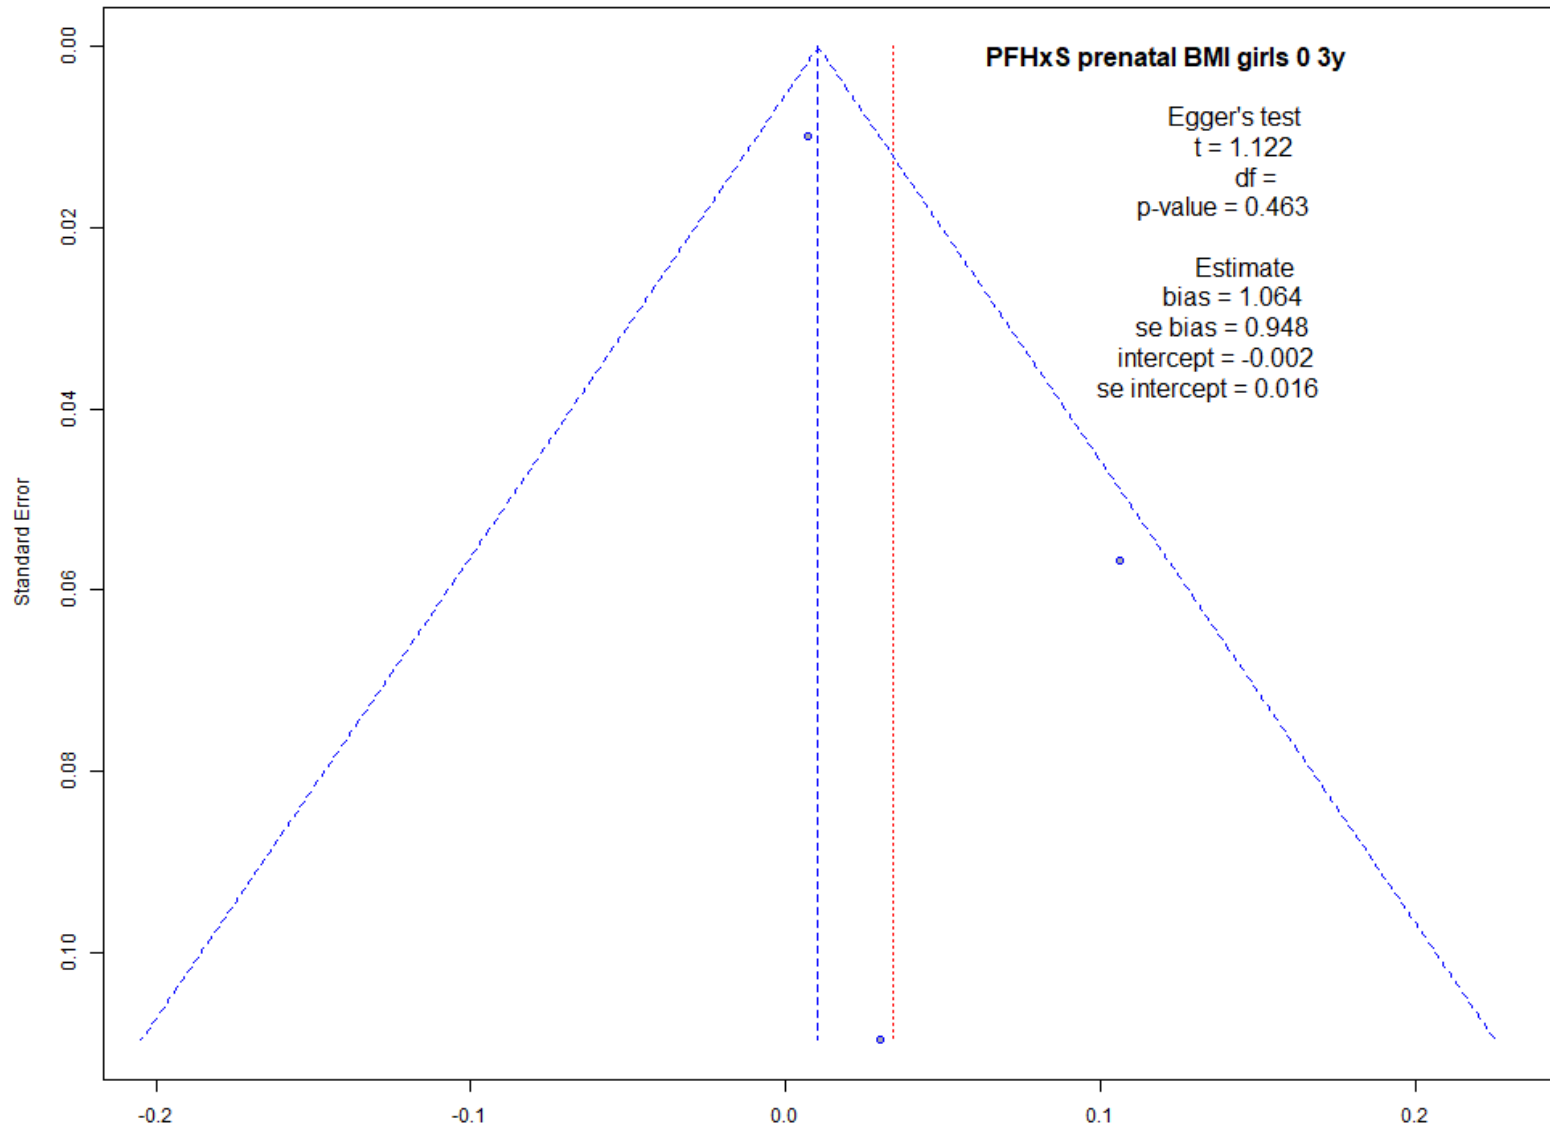

# Prenatal and childhood exposure to per-/polyfluoroalkyl substances (PFASs) and its associations with childhood overweight and/or obesity: a systematic review with meta-analyses

Gianfranco Frigerio, Chiara Matilde Ferrari, and Silvia Fustinoni

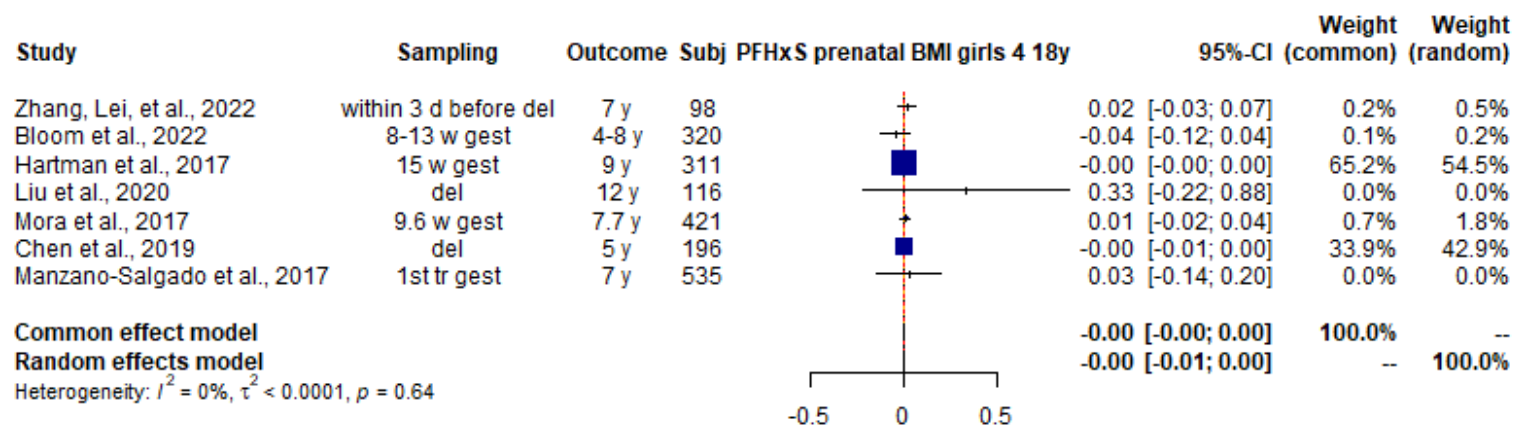



**Prenatal and childhood exposure to per-/polyfluoroalkyl substances (PFASs) and its associations with childhood overweight and/or obesity: a systematic review with meta-analyses**

Gianfranco Frigerio, Chiara Matilde Ferrari, and Silvia Fustinoni

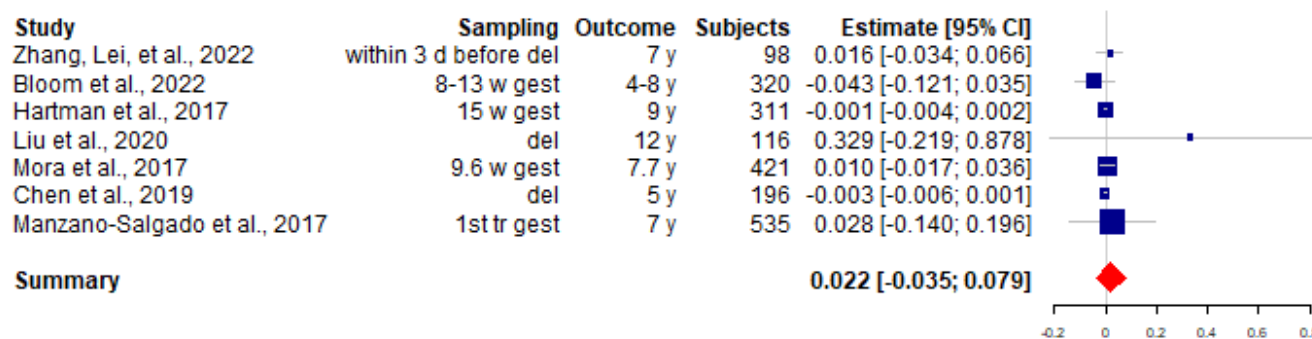

Prenatal and childhood exposure to per-/polyfluoroalkyl substances (PFASs) and its associations with childhood overweight and/or obesity: a systematic review with meta-analyses

Gianfranco Frigerio, Chiara Matilde Ferrari, and Silvia Fustinoni

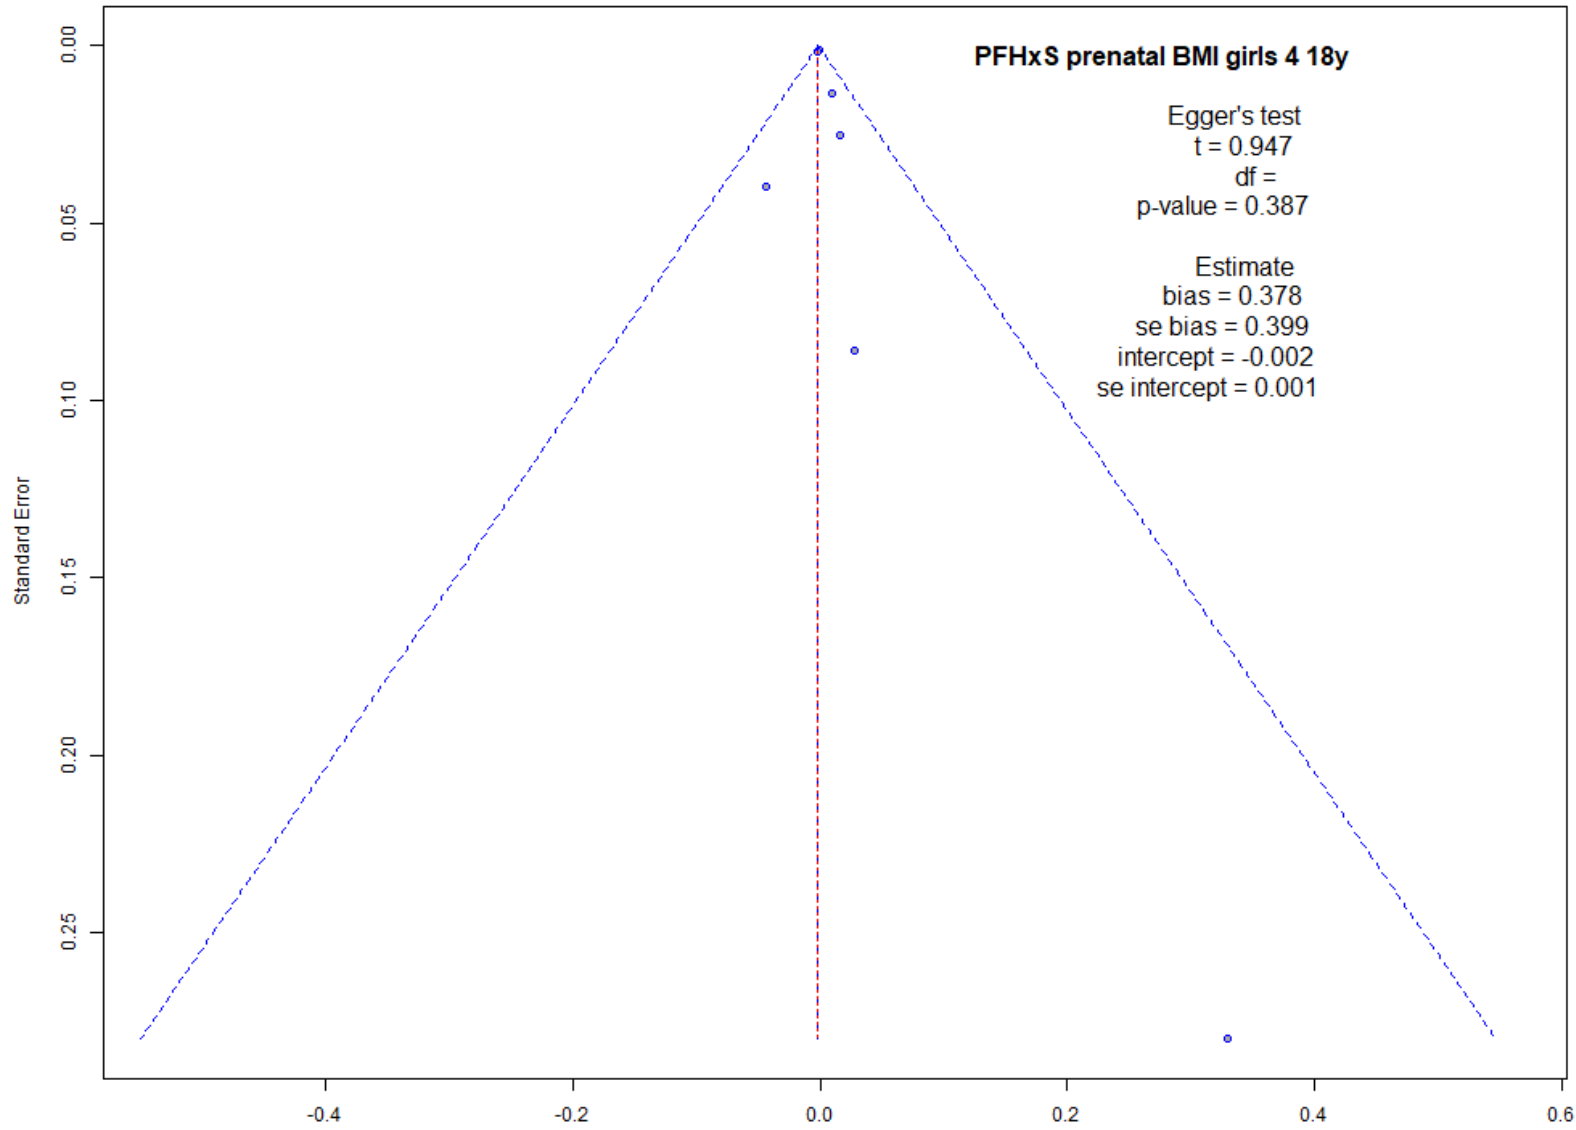

**Prenatal and childhood exposure to per-/polyfluoroalkyl substances (PFASs) and its associations with childhood overweight and/or obesity: a systematic review with meta-analyses**

Gianfranco Frigerio, Chiara Matilde Ferrari, and Silvia Fustinoni

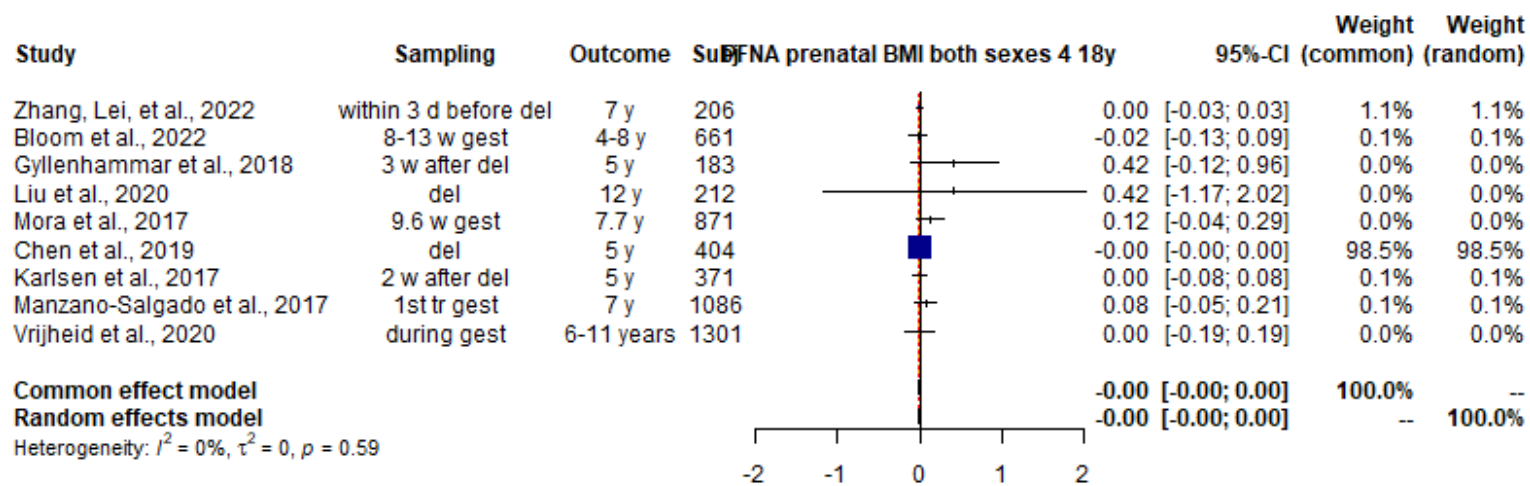

# Prenatal and childhood exposure to per-/polyfluoroalkyl substances (PFASs) and its associations with childhood overweight and/or obesity: a systematic review with meta-analyses

Gianfranco Frigerio, Chiara Matilde Ferrari, and Silvia Fustinoni

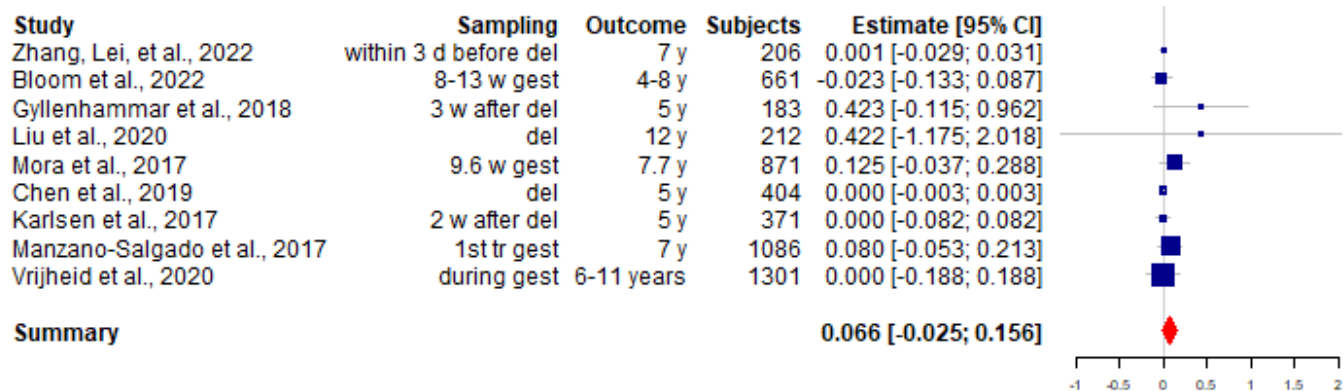

Prenatal and childhood exposure to per-/polyfluoroalkyl substances (PFASs) and its associations with childhood overweight and/or obesity: a systematic review with meta-analyses

Gianfranco Frigerio, Chiara Matilde Ferrari, and Silvia Fustinoni

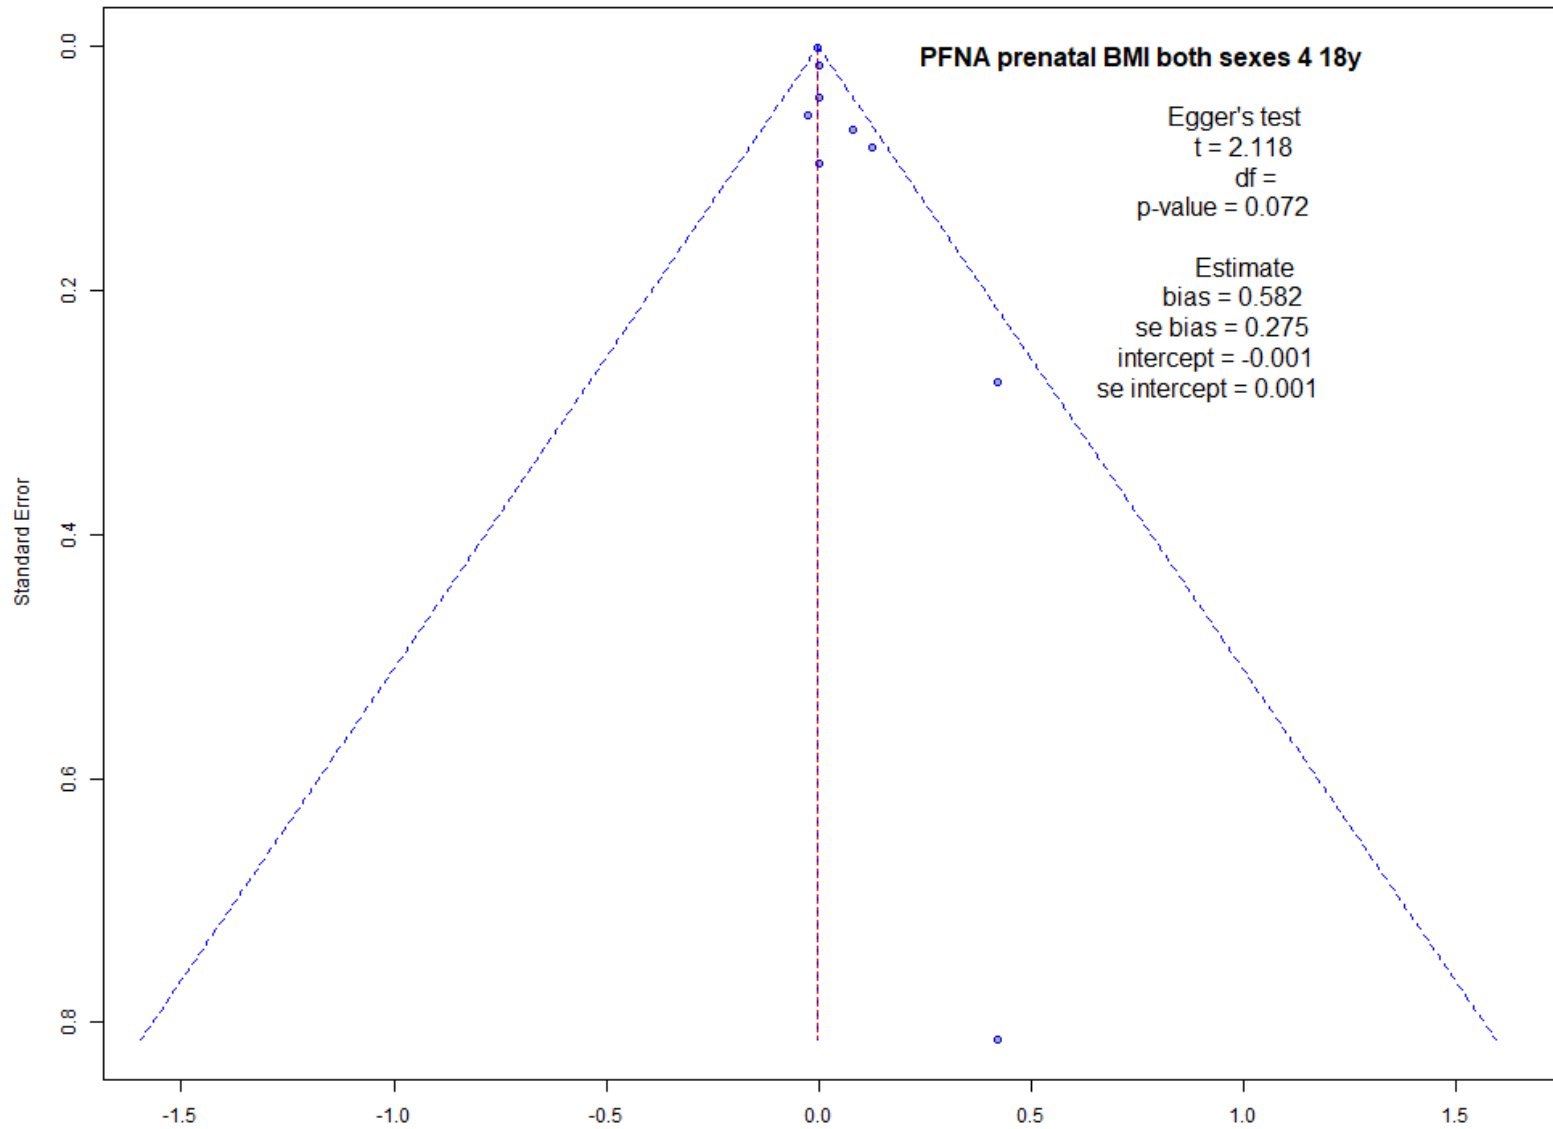

Prenatal and childhood exposure to per-/polyfluoroalkyl substances (PFASs) and its associations with childhood overweight and/or obesity: a systematic review with meta-analyses

Gianfranco Frigerio, Chiara Matilde Ferrari, and Silvia Fustinoni

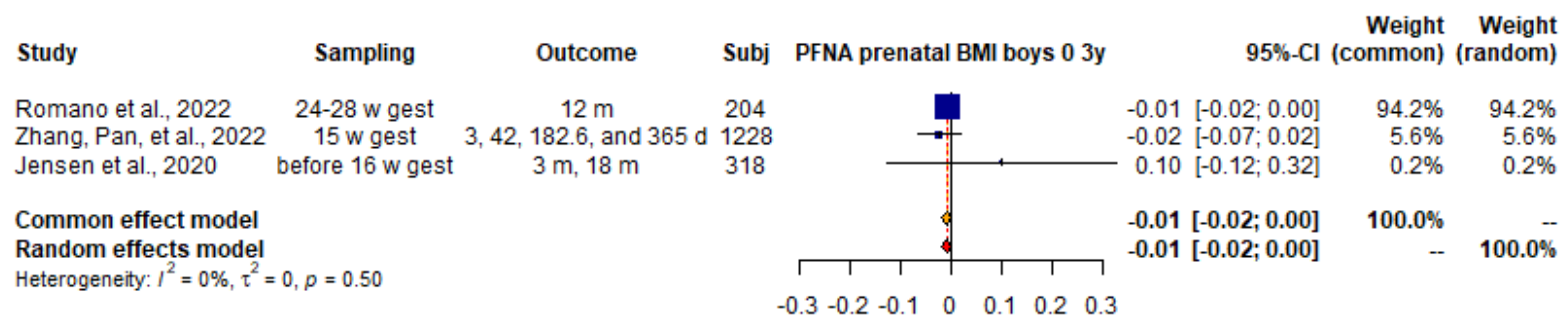

**Prenatal and childhood exposure to per-/polyfluoroalkyl substances (PFASs) and its associations with childhood overweight and/or obesity: a systematic review with meta-analyses**

Gianfranco Frigerio, Chiara Matilde Ferrari, and Silvia Fustinoni

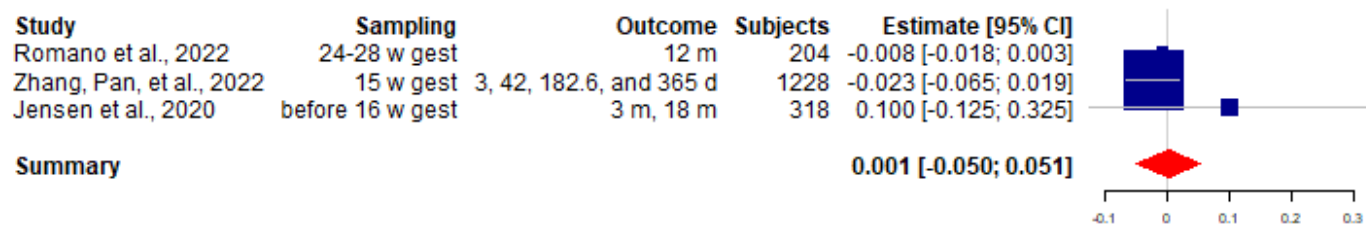

Prenatal and childhood exposure to per-/polyfluoroalkyl substances (PFASs) and its associations with childhood overweight and/or obesity: a systematic review with meta-analyses

Gianfranco Frigerio, Chiara Matilde Ferrari, and Silvia Fustinoni

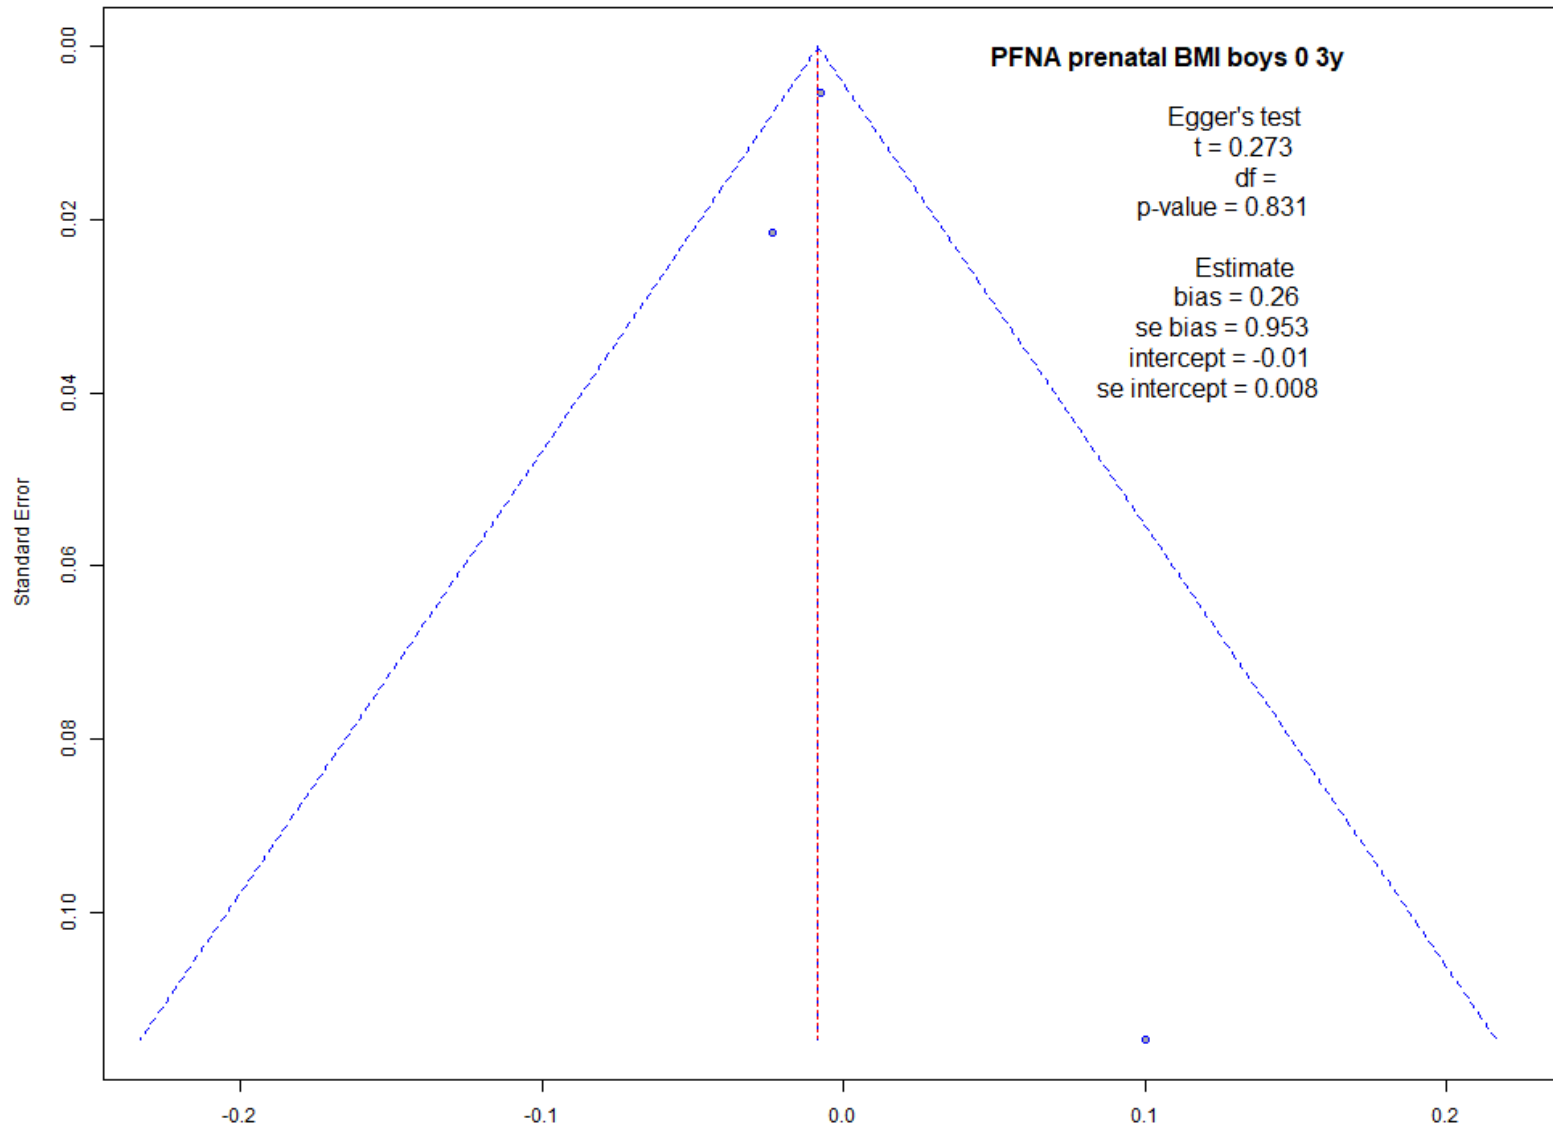



Prenatal and childhood exposure to per-/polyfluoroalkyl substances (PFASs) and its associations with childhood overweight and/or obesity: a systematic review with meta-analyses

Gianfranco Frigerio, Chiara Matilde Ferrari, and Silvia Fustinoni

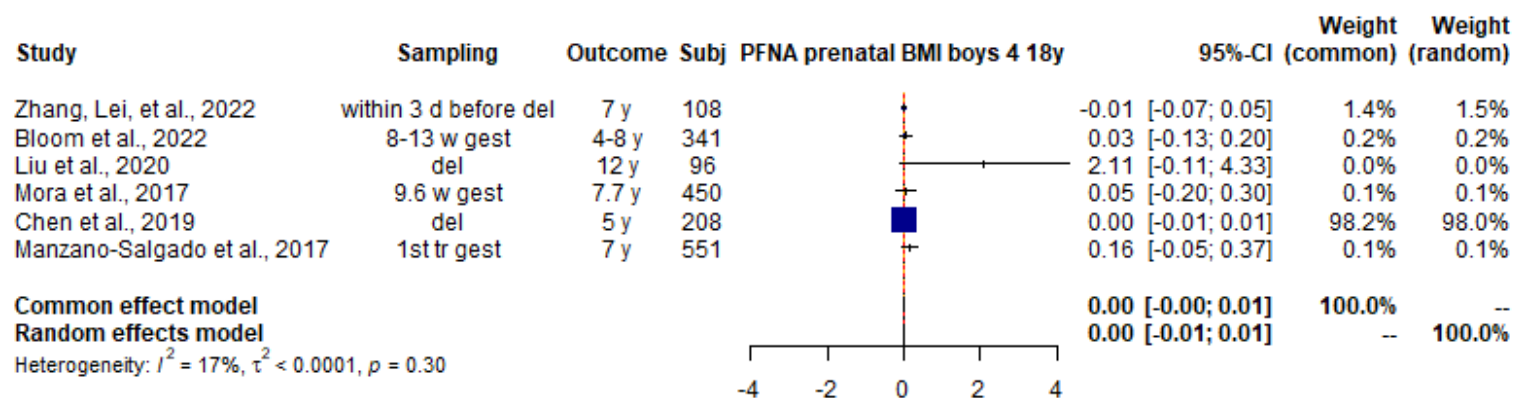

**Prenatal and childhood exposure to per-/polyfluoroalkyl substances (PFASs) and its associations with childhood overweight and/or obesity: a systematic review with meta-analyses**

Gianfranco Frigerio, Chiara Matilde Ferrari, and Silvia Fustinoni

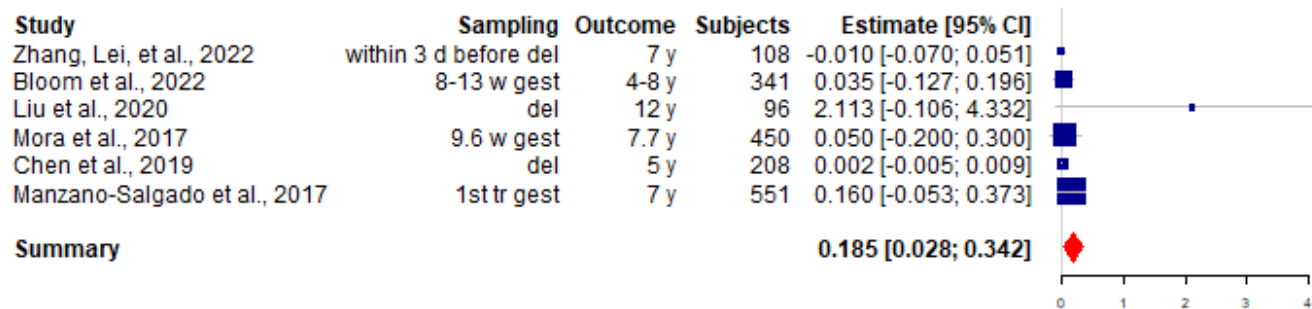

Prenatal and childhood exposure to per-/polyfluoroalkyl substances (PFASs) and its associations with childhood overweight and/or obesity: a systematic review with meta-analyses

Gianfranco Frigerio, Chiara Matilde Ferrari, and Silvia Fustinoni

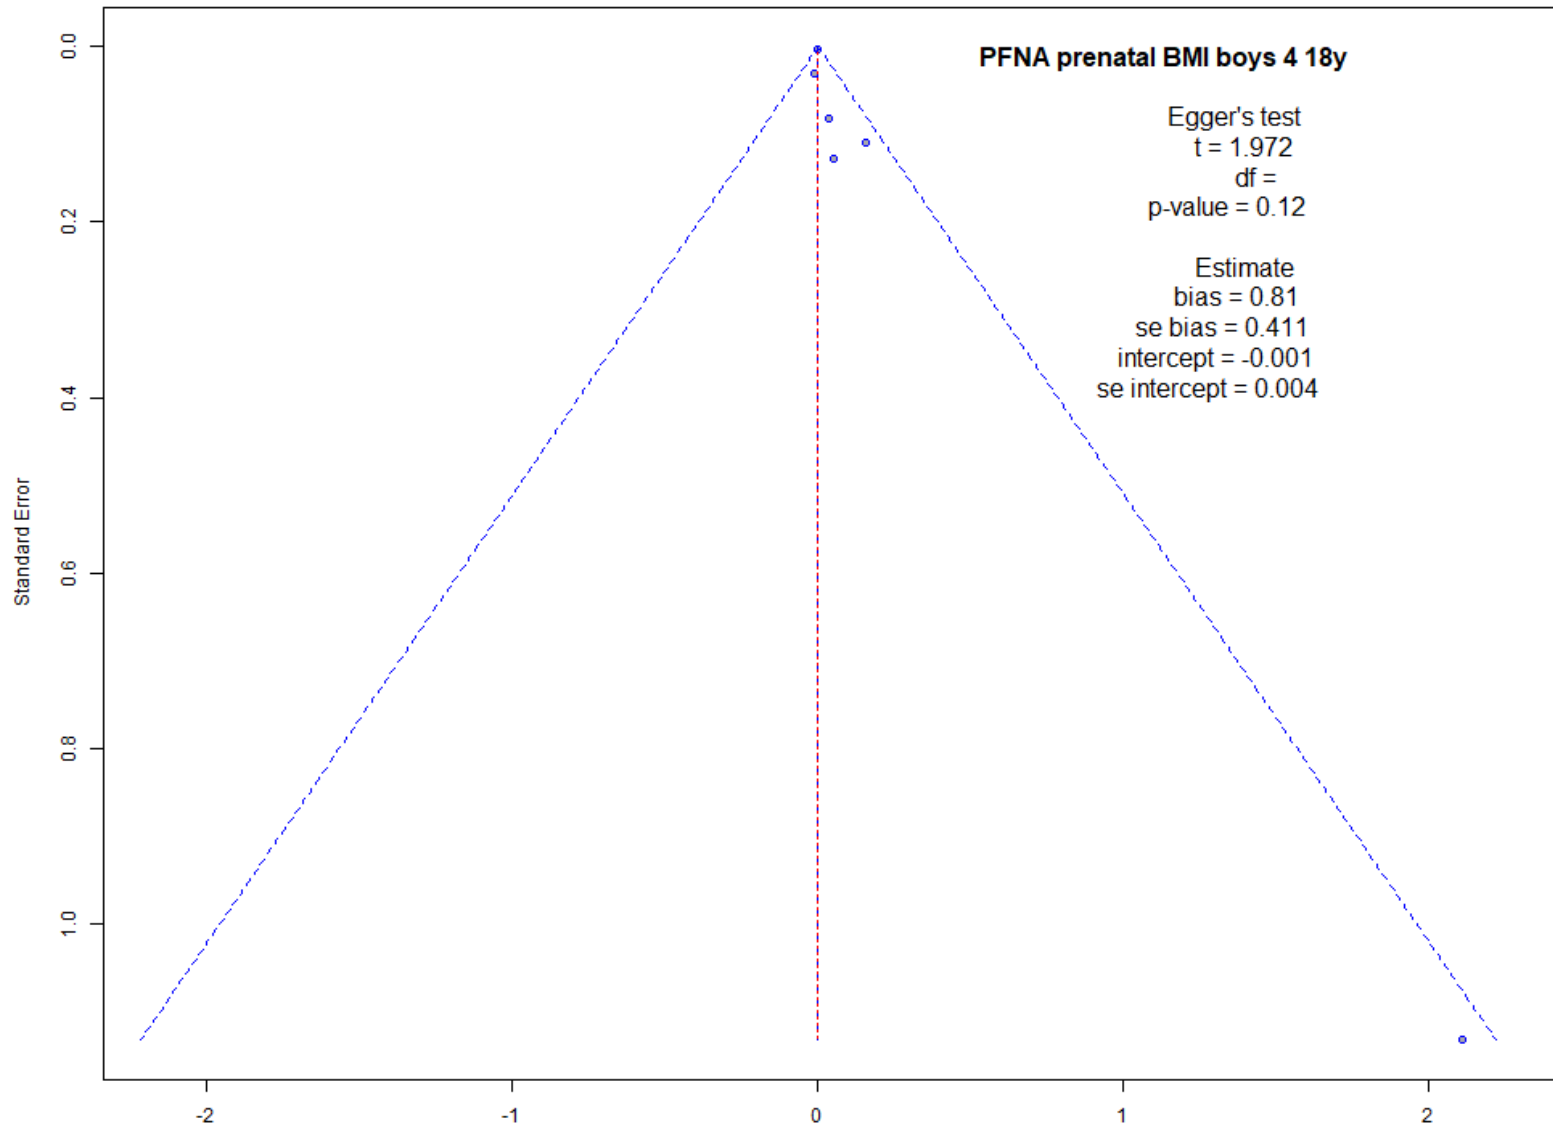

**Prenatal and childhood exposure to per-/polyfluoroalkyl substances (PFASs) and its associations with childhood overweight and/or obesity: a systematic review with meta-analyses**

Gianfranco Frigerio, Chiara Matilde Ferrari, and Silvia Fustinoni

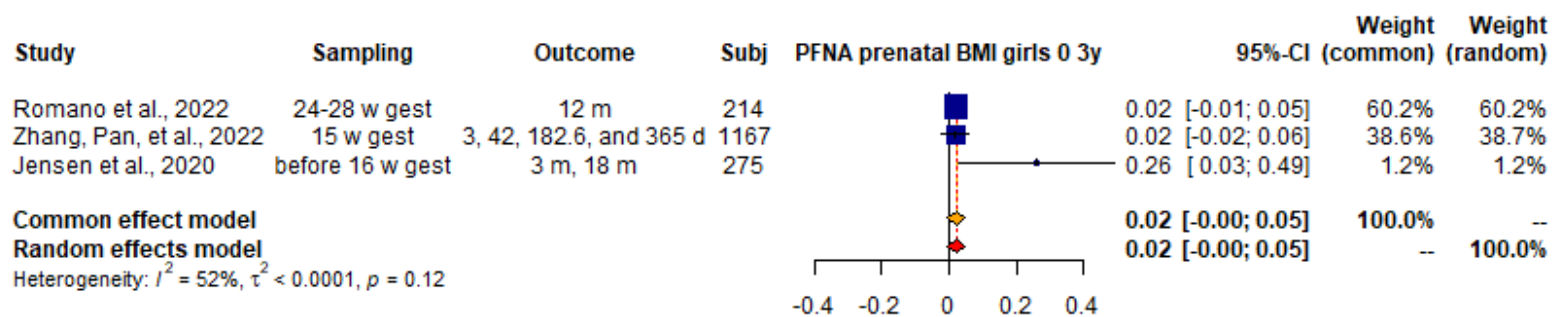

**Prenatal and childhood exposure to per-/polyfluoroalkyl substances (PFASs) and its associations with childhood overweight and/or obesity: a systematic review with meta-analyses**

Gianfranco Frigerio, Chiara Matilde Ferrari, and Silvia Fustinoni

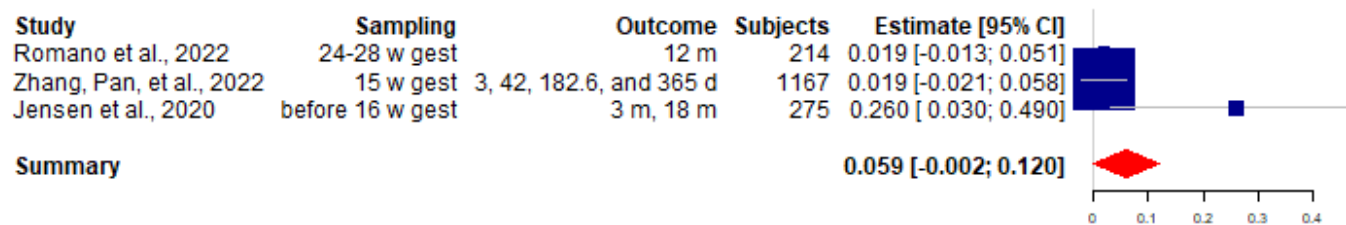

Prenatal and childhood exposure to per-/polyfluoroalkyl substances (PFASs) and its associations with childhood overweight and/or obesity: a systematic review with meta-analyses

Gianfranco Frigerio, Chiara Matilde Ferrari, and Silvia Fustinoni

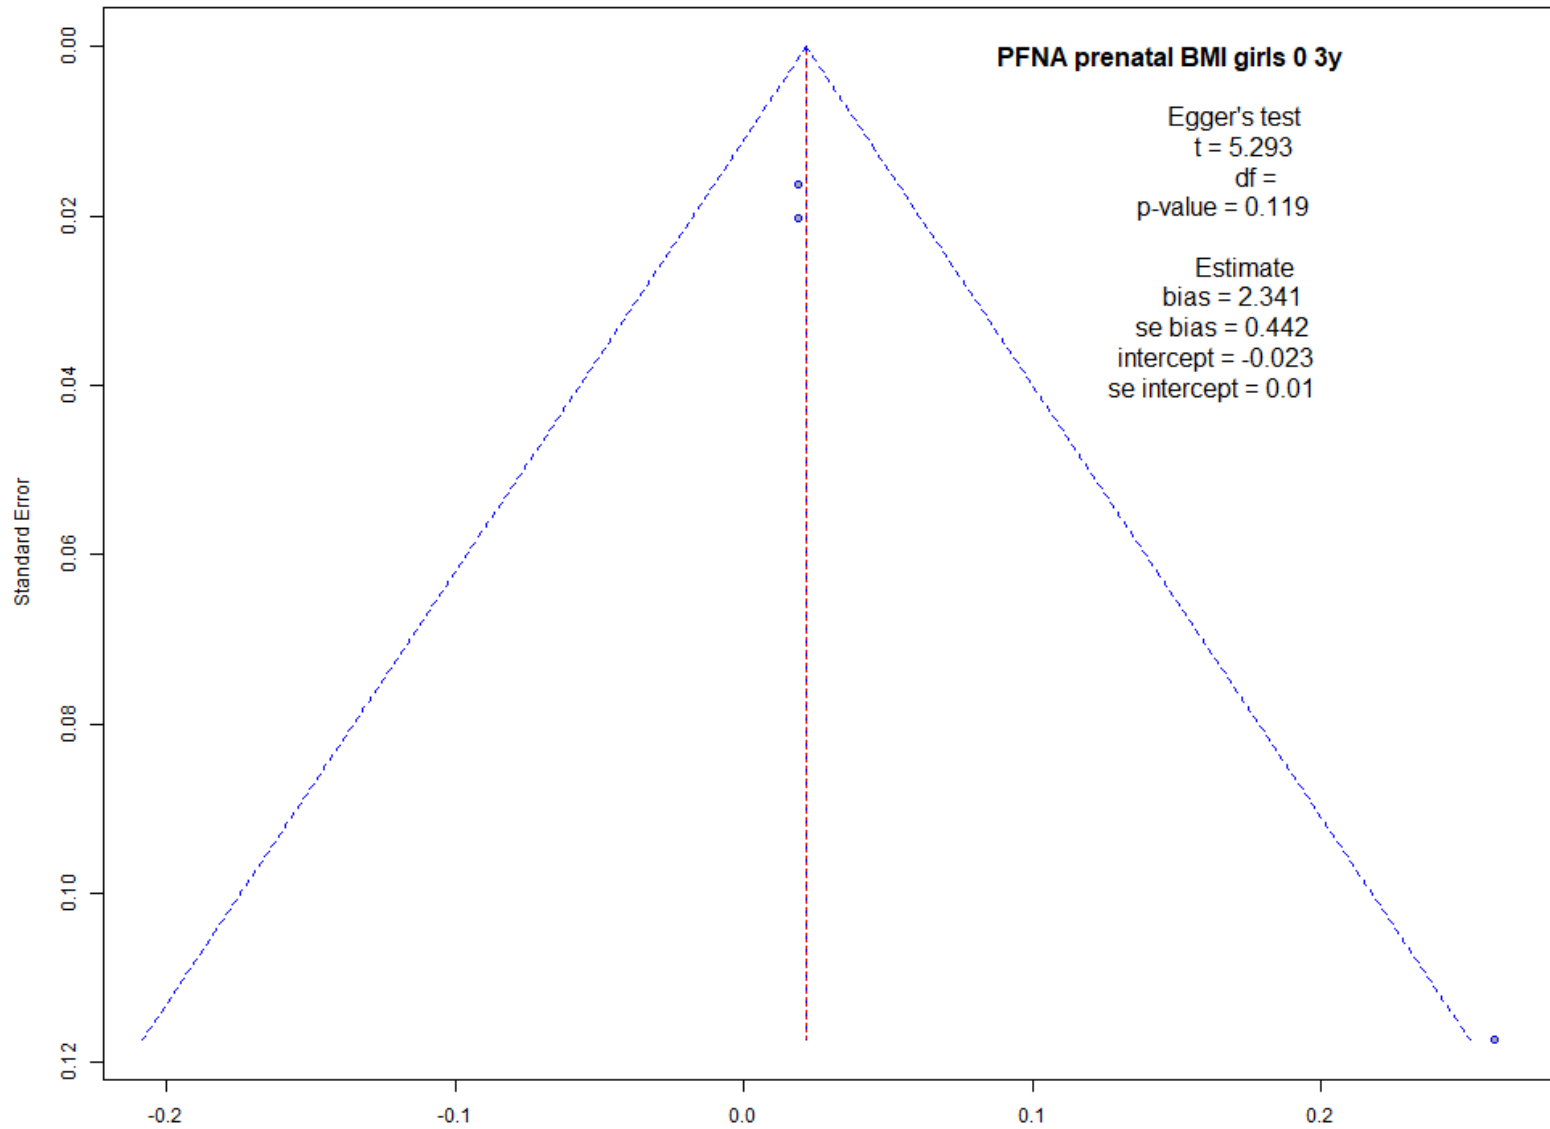

# Prenatal and childhood exposure to per-/polyfluoroalkyl substances (PFASs) and its associations with childhood overweight and/or obesity: a systematic review with meta-analyses

Gianfranco Frigerio, Chiara Matilde Ferrari, and Silvia Fustinoni

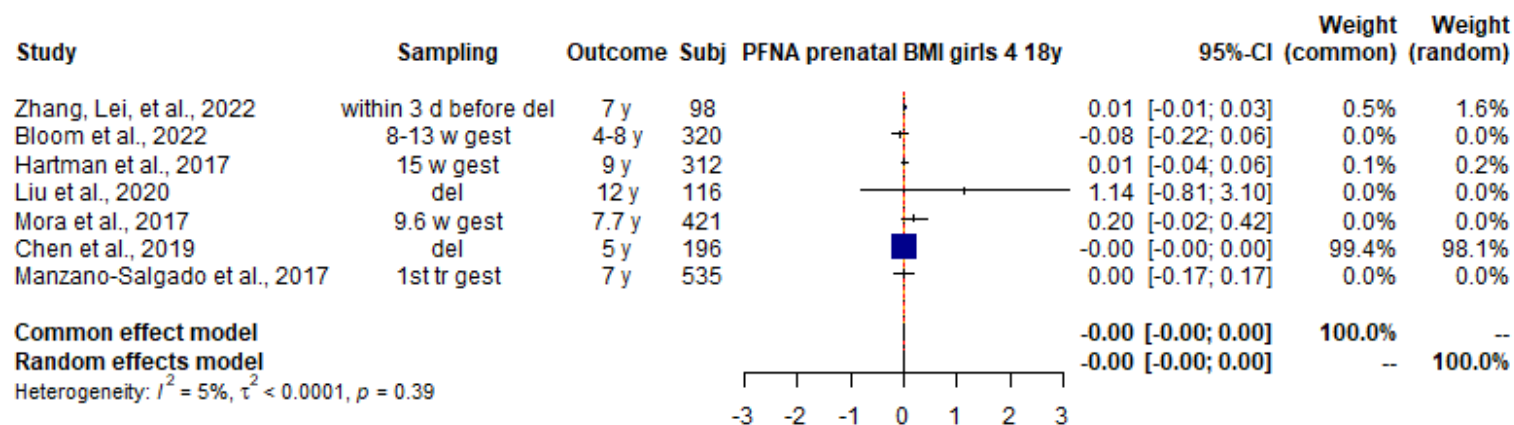

**Prenatal and childhood exposure to per-/polyfluoroalkyl substances (PFASs) and its associations with childhood overweight and/or obesity: a systematic review with meta-analyses**

Gianfranco Frigerio, Chiara Matilde Ferrari, and Silvia Fustinoni

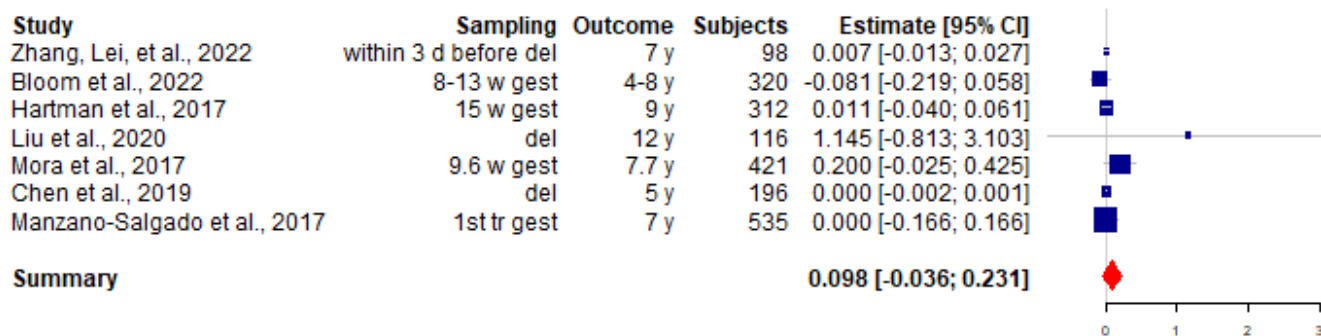



Prenatal and childhood exposure to per-/polyfluoroalkyl substances (PFASs) and its associations with childhood overweight and/or obesity: a systematic review with meta-analyses

Gianfranco Frigerio, Chiara Matilde Ferrari, and Silvia Fustinoni

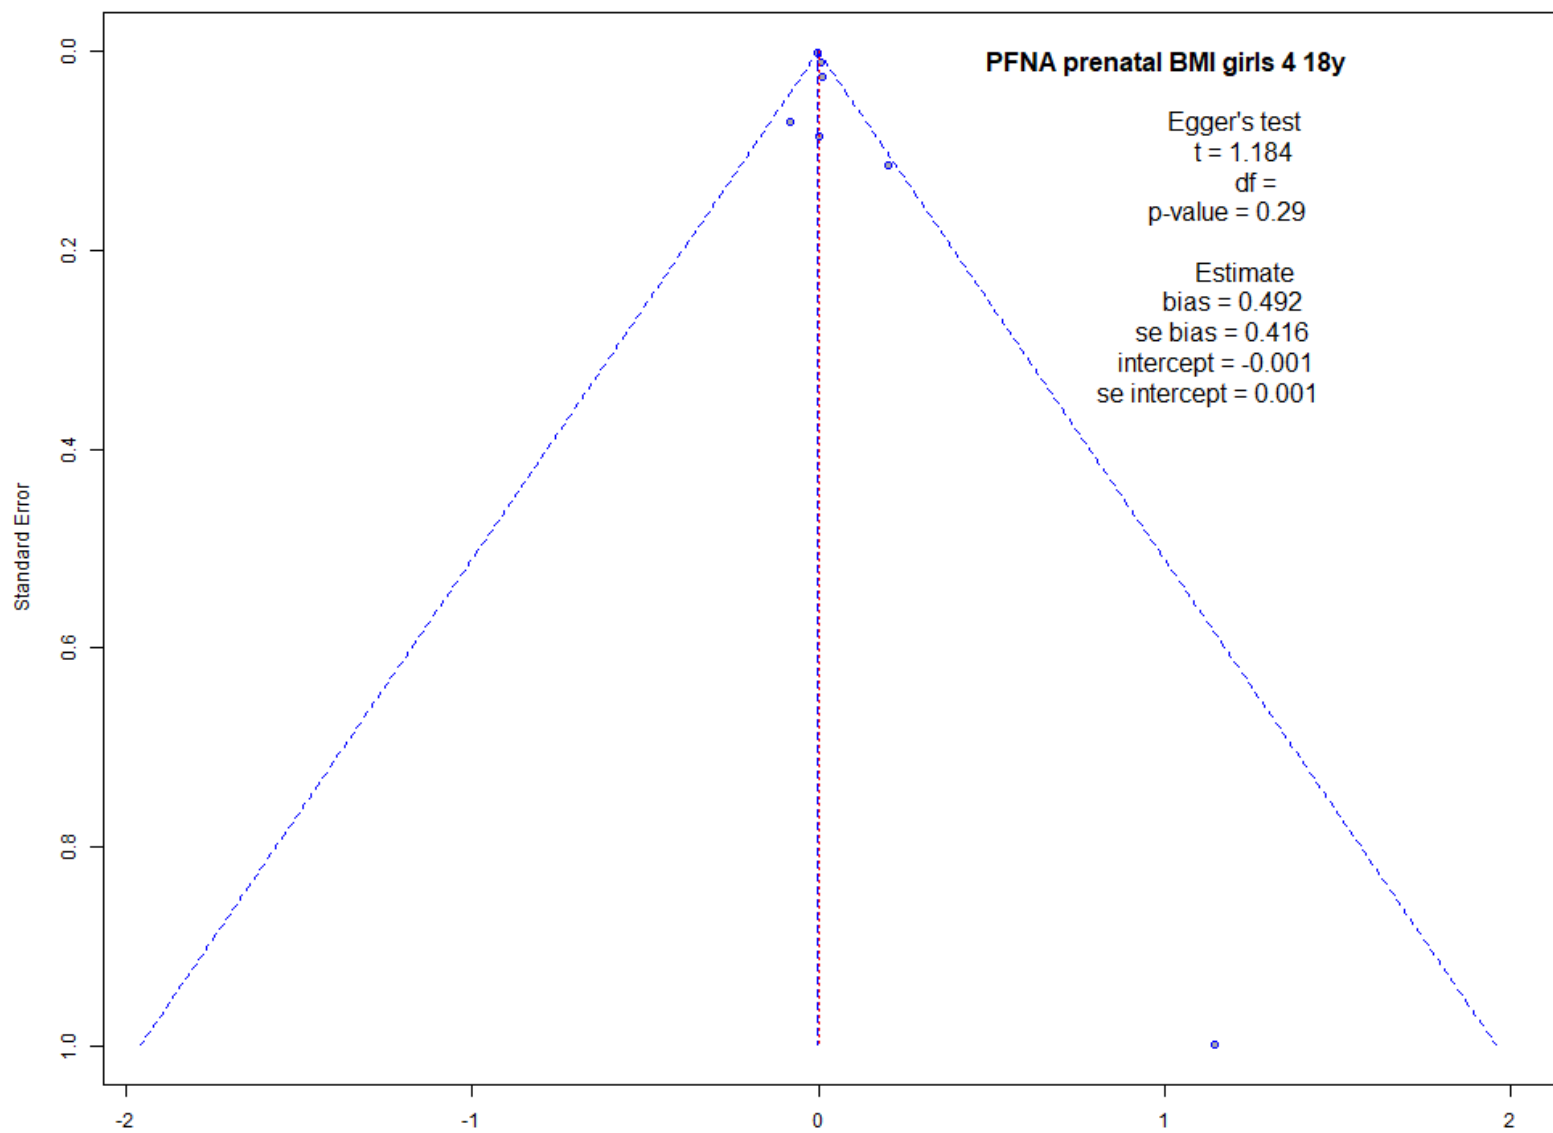

**Prenatal and childhood exposure to per-/polyfluoroalkyl substances (PFASs) and its associations with childhood overweight and/or obesity: a systematic review with meta-analyses**

Gianfranco Frigerio, Chiara Matilde Ferrari, and Silvia Fustinoni

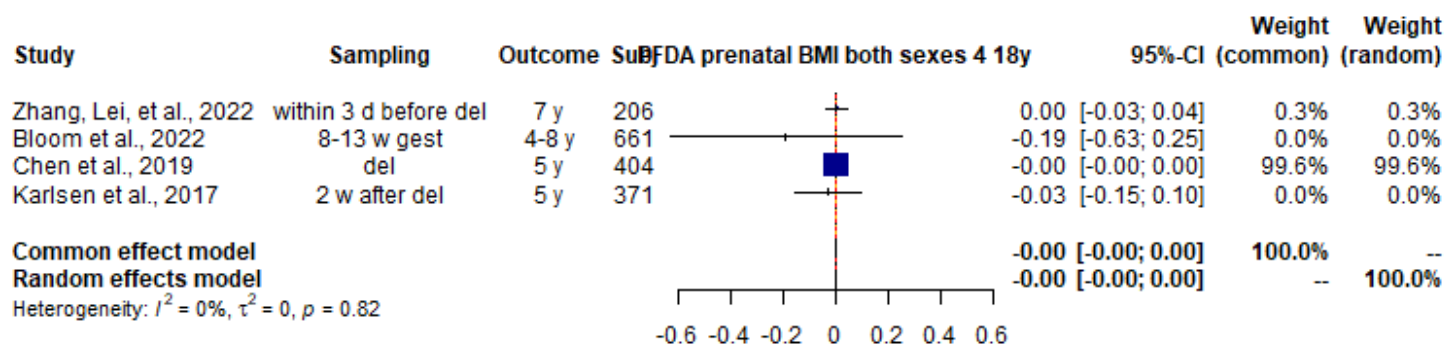

# Prenatal and childhood exposure to per-/polyfluoroalkyl substances (PFASs) and its associations with childhood overweight and/or obesity: a systematic review with meta-analyses

Gianfranco Frigerio, Chiara Matilde Ferrari, and Silvia Fustinoni

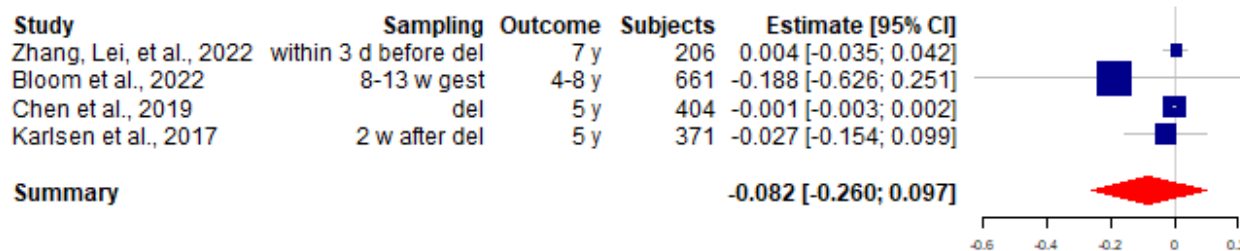

Prenatal and childhood exposure to per-/polyfluoroalkyl substances (PFASs) and its associations with childhood overweight and/or obesity: a systematic review with meta-analyses

Gianfranco Frigerio, Chiara Matilde Ferrari, and Silvia Fustinoni

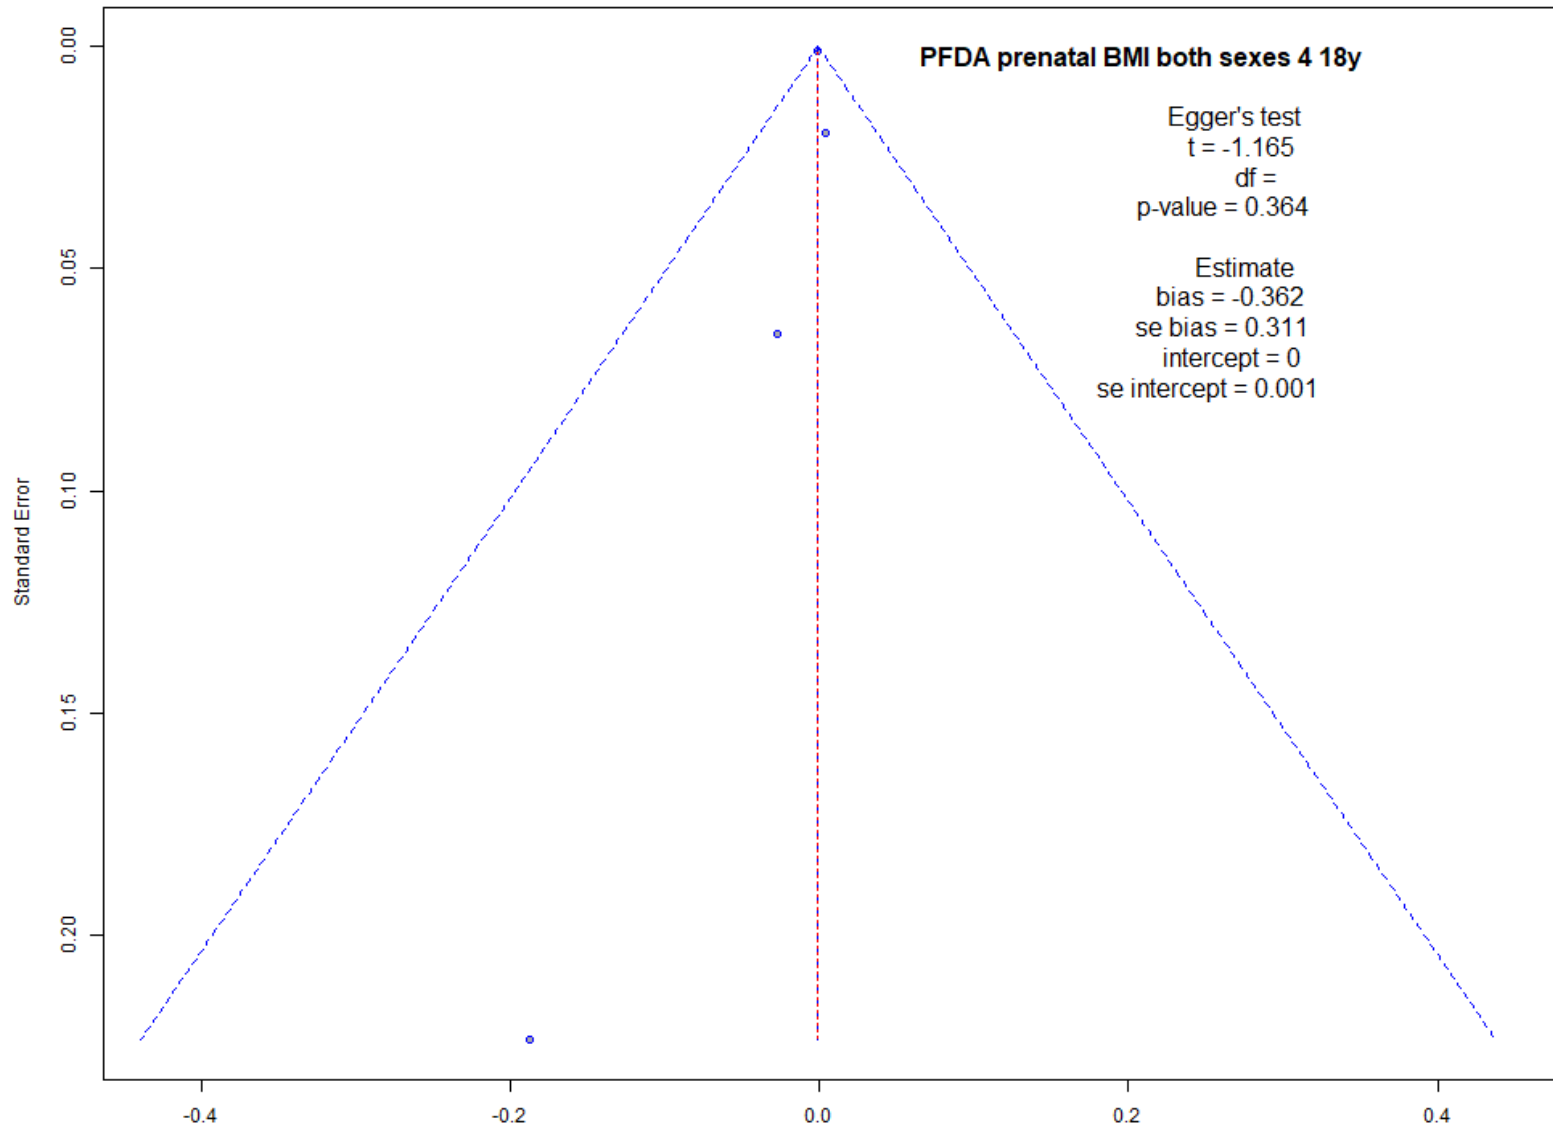

**Prenatal and childhood exposure to per-/polyfluoroalkyl substances (PFASs) and its associations with childhood overweight and/or obesity: a systematic review with meta-analyses**

Gianfranco Frigerio, Chiara Matilde Ferrari, and Silvia Fustinoni

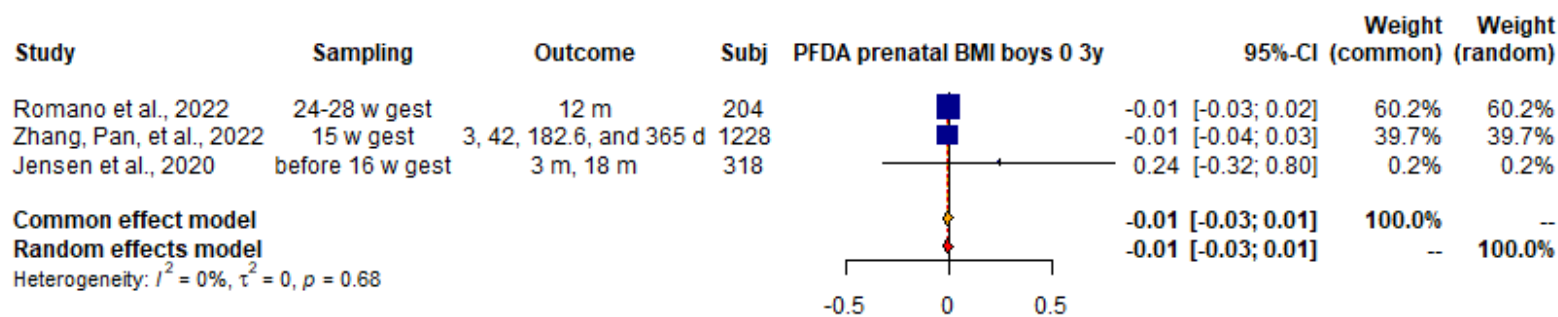

# Prenatal and childhood exposure to per-/polyfluoroalkyl substances (PFASs) and its associations with childhood overweight and/or obesity: a systematic review with meta-analyses

Gianfranco Frigerio, Chiara Matilde Ferrari, and Silvia Fustinoni

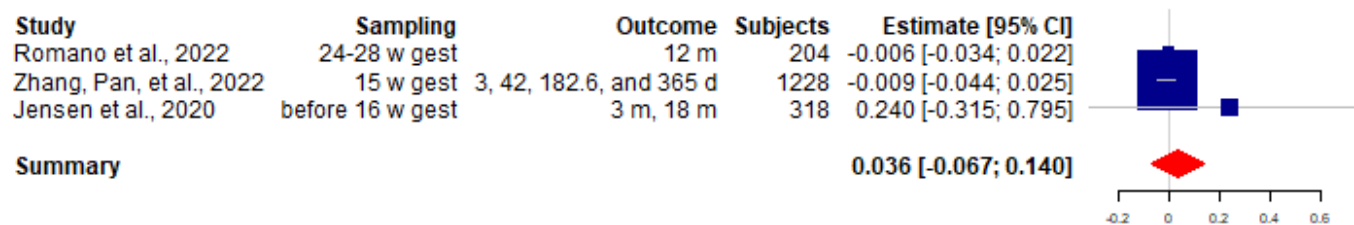

Prenatal and childhood exposure to per-/polyfluoroalkyl substances (PFASs) and its associations with childhood overweight and/or obesity: a systematic review with meta-analyses

Gianfranco Frigerio, Chiara Matilde Ferrari, and Silvia Fustinoni

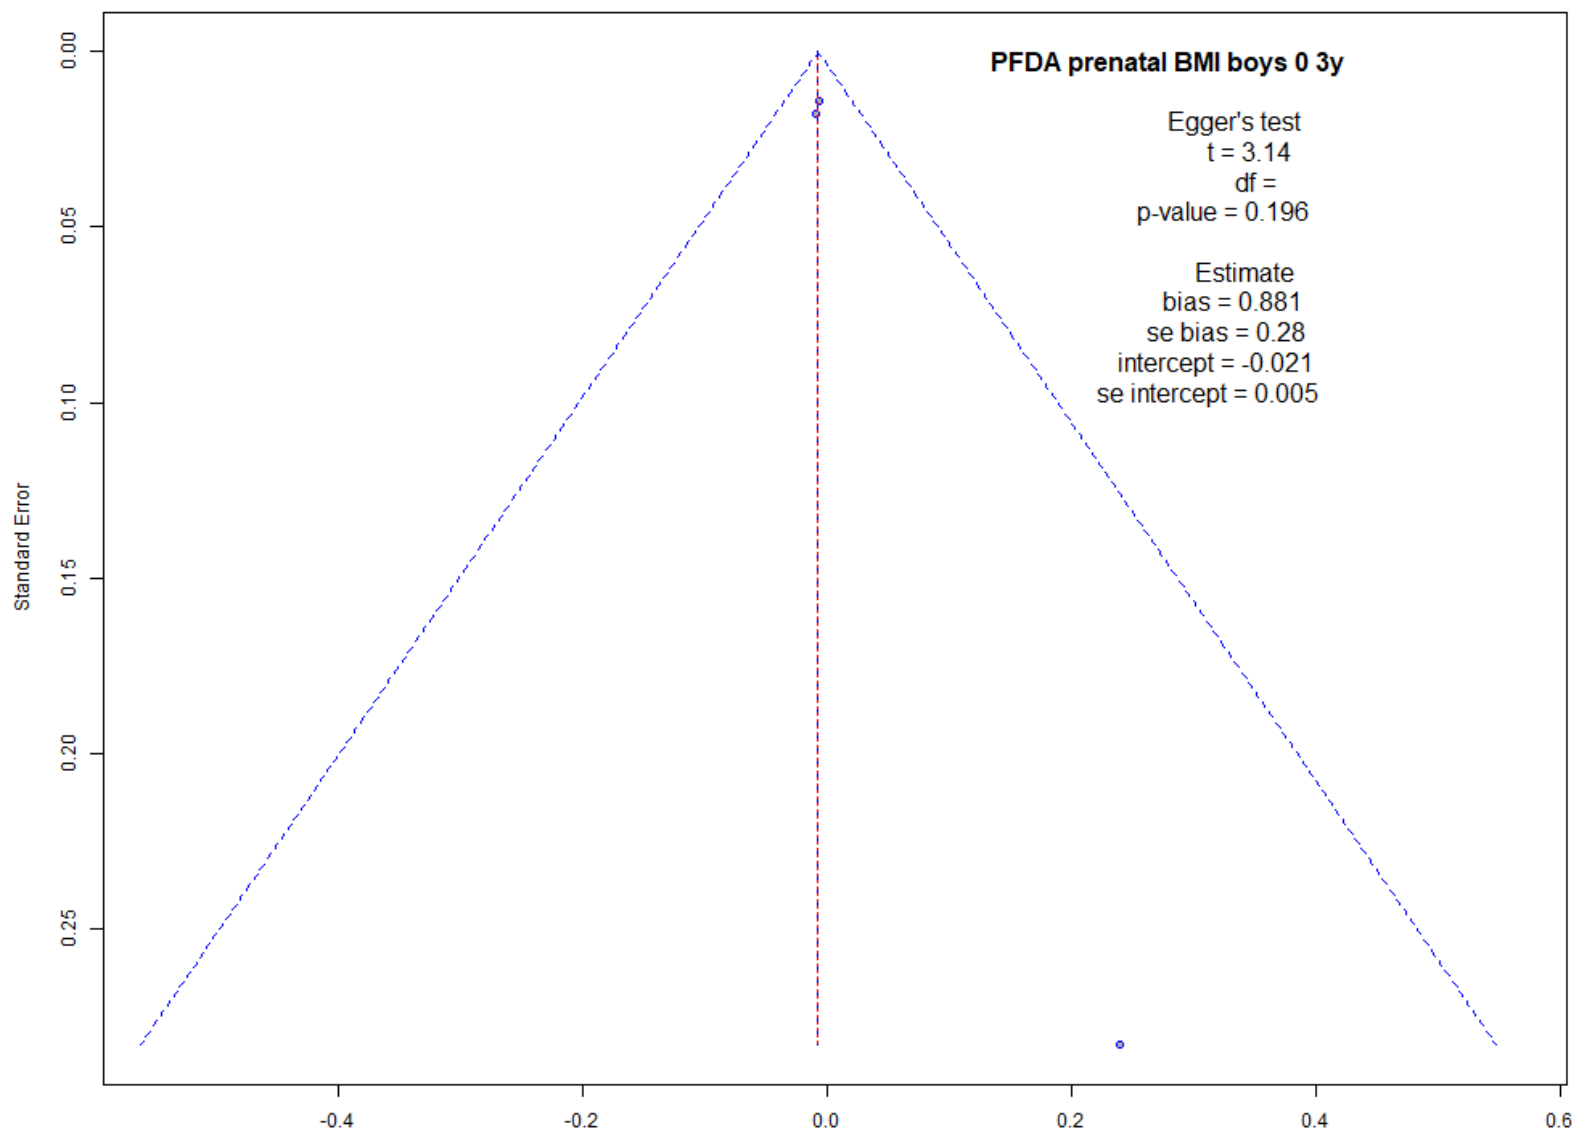

**Prenatal and childhood exposure to per-/polyfluoroalkyl substances (PFASs) and its associations with childhood overweight and/or obesity: a systematic review with meta-analyses**

Gianfranco Frigerio, Chiara Matilde Ferrari, and Silvia Fustinoni

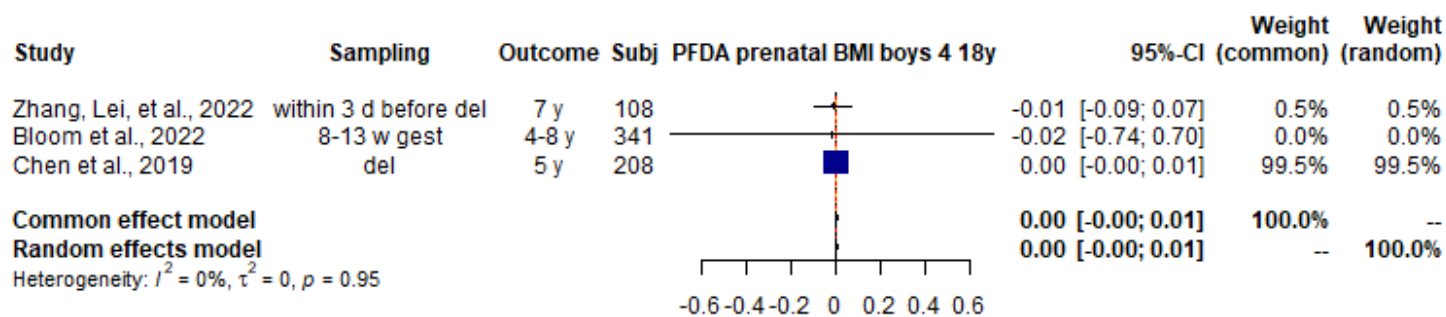



# Prenatal and childhood exposure to per-/polyfluoroalkyl substances (PFASs) and its associations with childhood overweight and/or obesity: a systematic review with meta-analyses

Gianfranco Frigerio, Chiara Matilde Ferrari, and Silvia Fustinoni

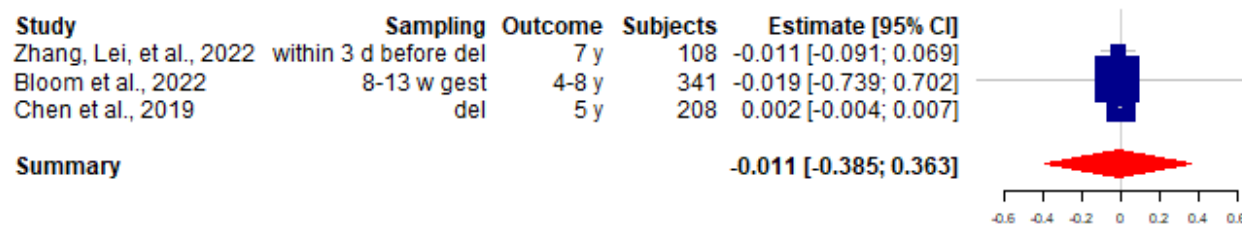

Prenatal and childhood exposure to per-/polyfluoroalkyl substances (PFASs) and its associations with childhood overweight and/or obesity: a systematic review with meta-analyses

Gianfranco Frigerio, Chiara Matilde Ferrari, and Silvia Fustinoni

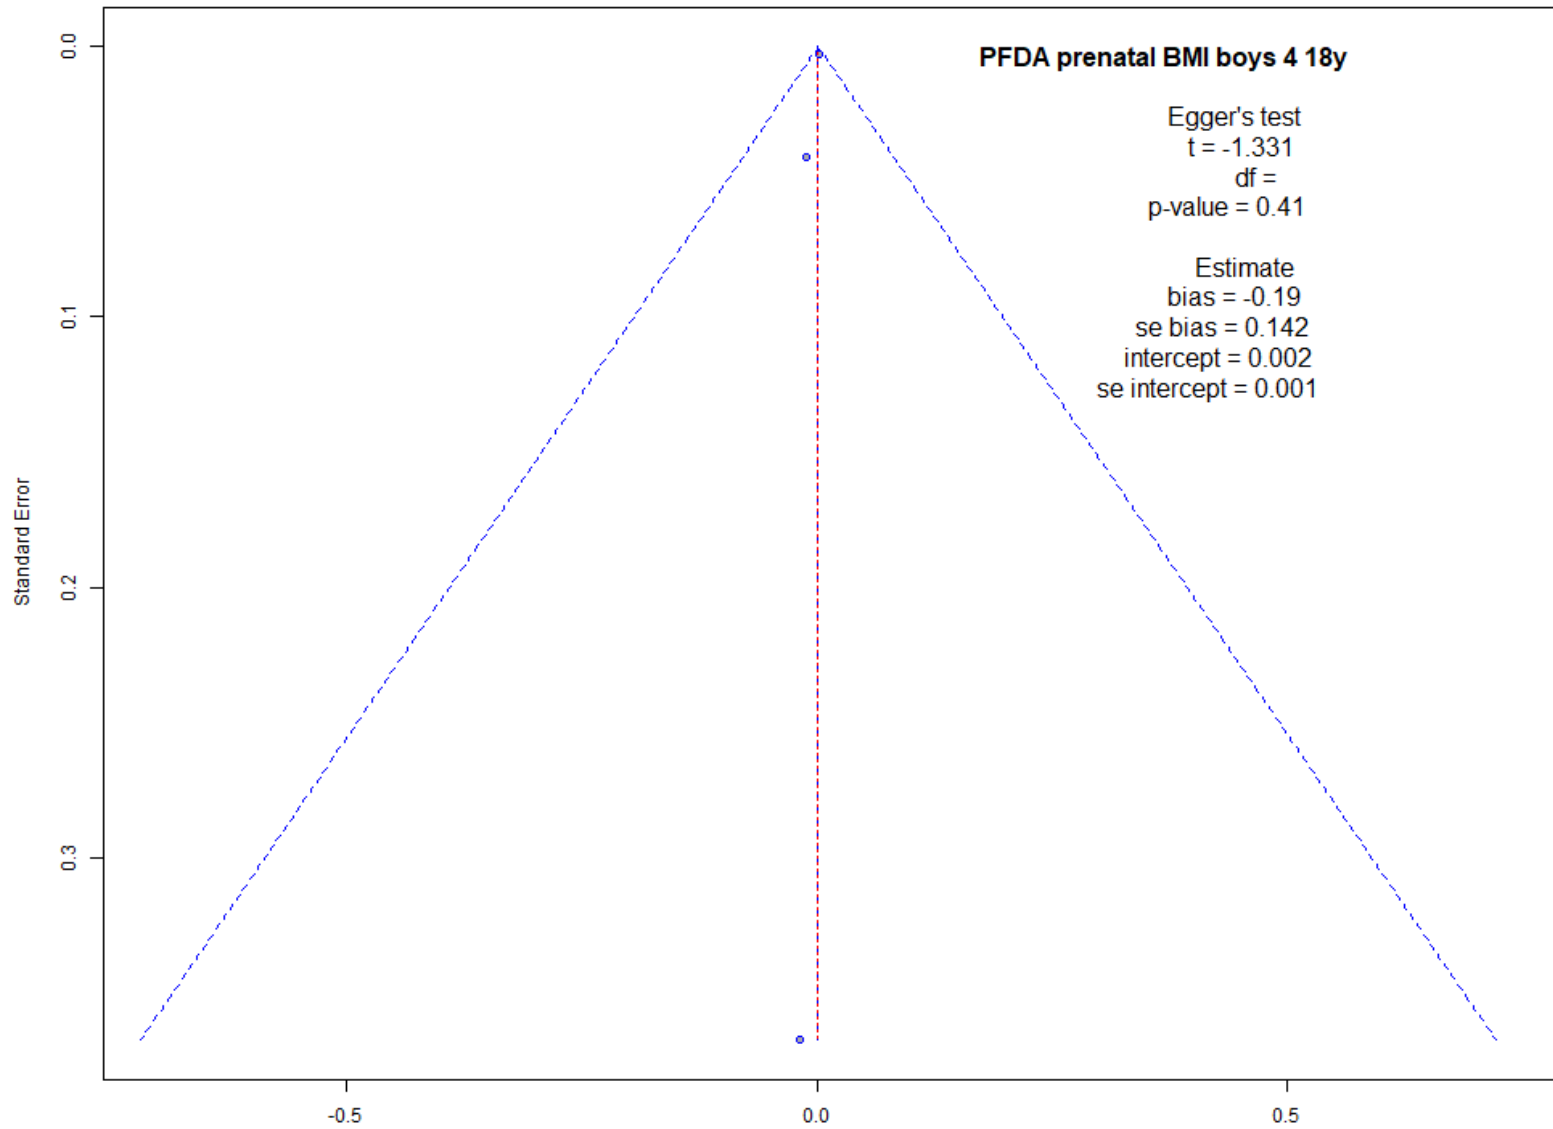

**Prenatal and childhood exposure to per-/polyfluoroalkyl substances (PFASs) and its associations with childhood overweight and/or obesity: a systematic review with meta-analyses**

Gianfranco Frigerio, Chiara Matilde Ferrari, and Silvia Fustinoni

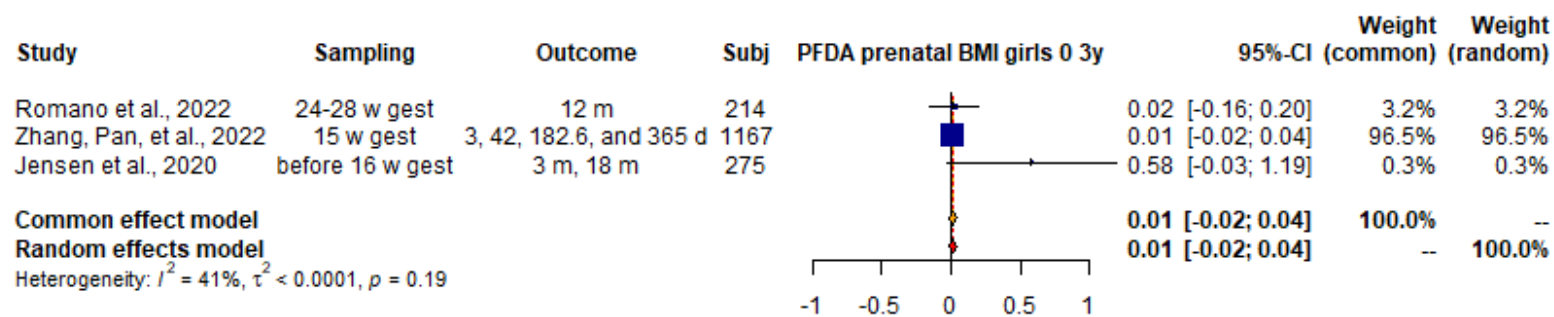

**Prenatal and childhood exposure to per-/polyfluoroalkyl substances (PFASs) and its associations with childhood overweight and/or obesity: a systematic review with meta-analyses**

Gianfranco Frigerio, Chiara Matilde Ferrari, and Silvia Fustinoni

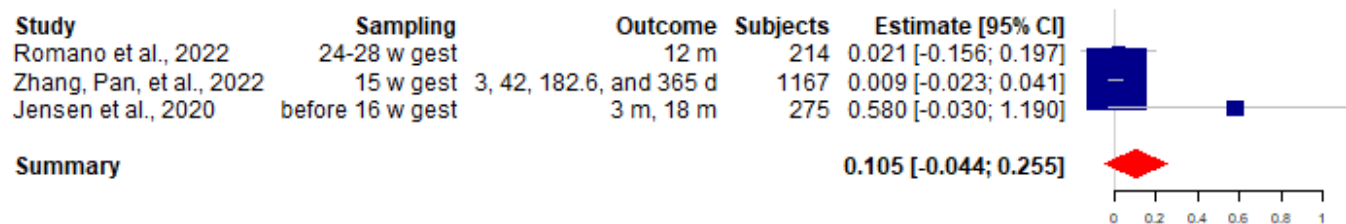

Prenatal and childhood exposure to per-/polyfluoroalkyl substances (PFASs) and its associations with childhood overweight and/or obesity: a systematic review with meta-analyses

Gianfranco Frigerio, Chiara Matilde Ferrari, and Silvia Fustinoni

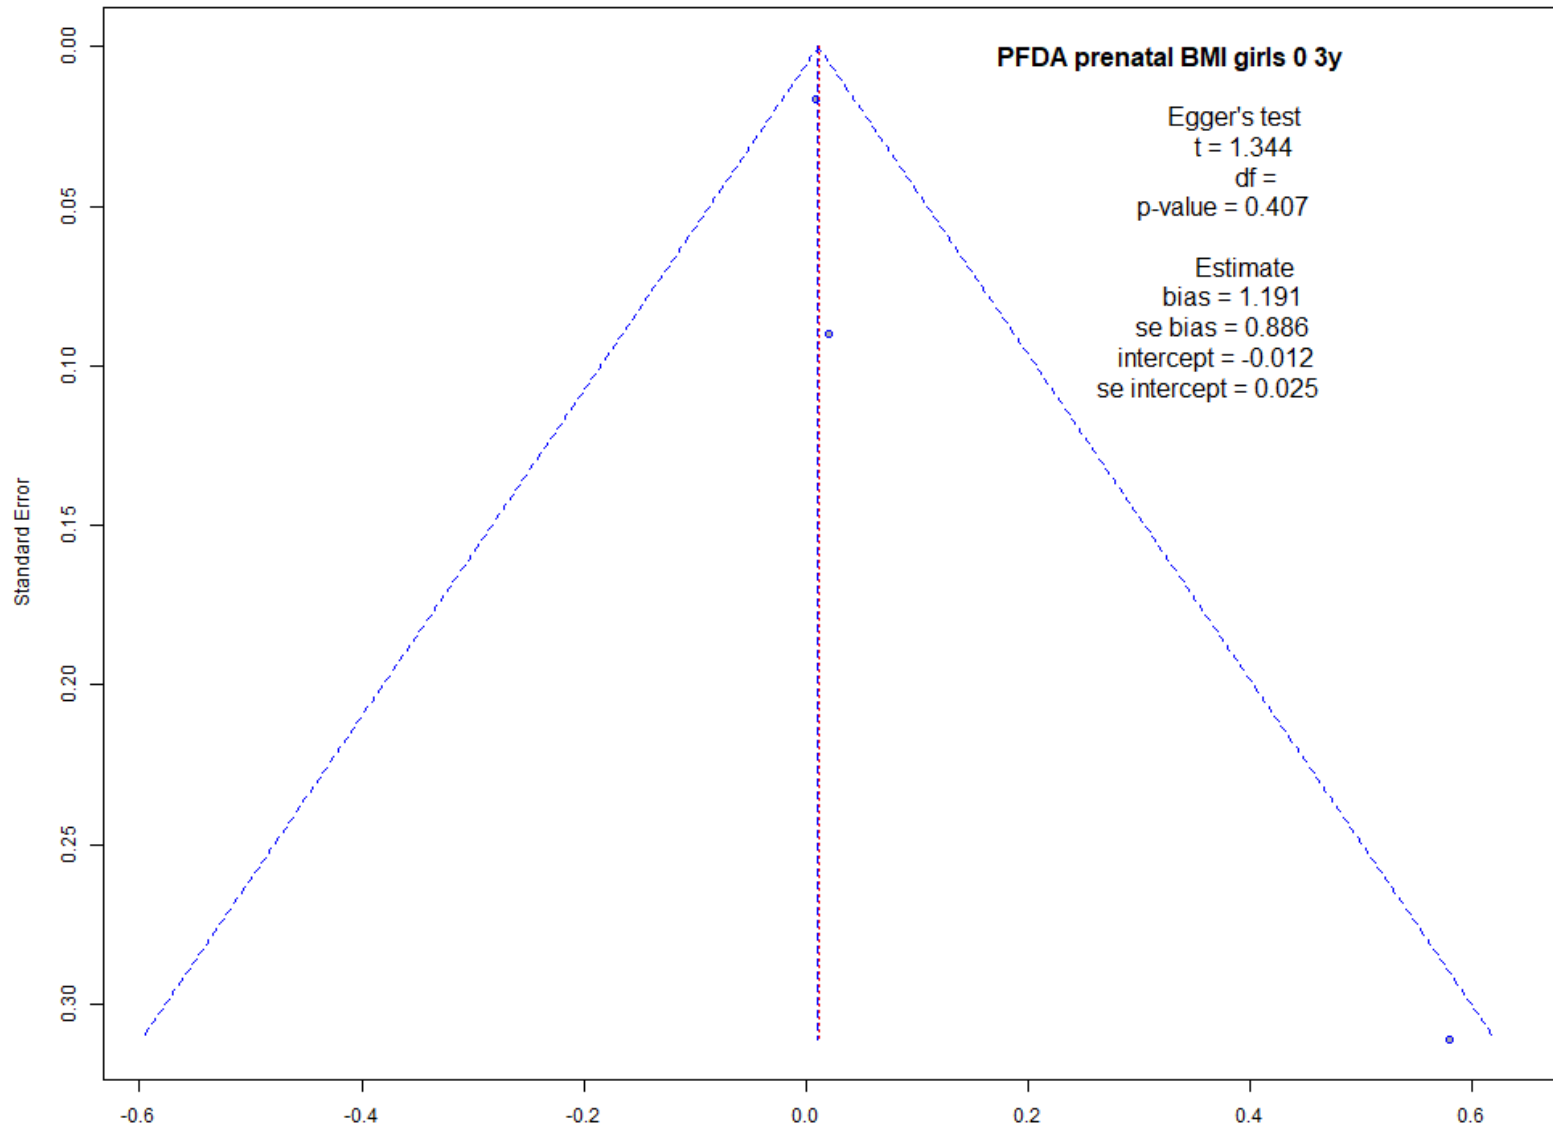

**Prenatal and childhood exposure to per-/polyfluoroalkyl substances (PFASs) and its associations with childhood overweight and/or obesity: a systematic review with meta-analyses**

Gianfranco Frigerio, Chiara Matilde Ferrari, and Silvia Fustinoni

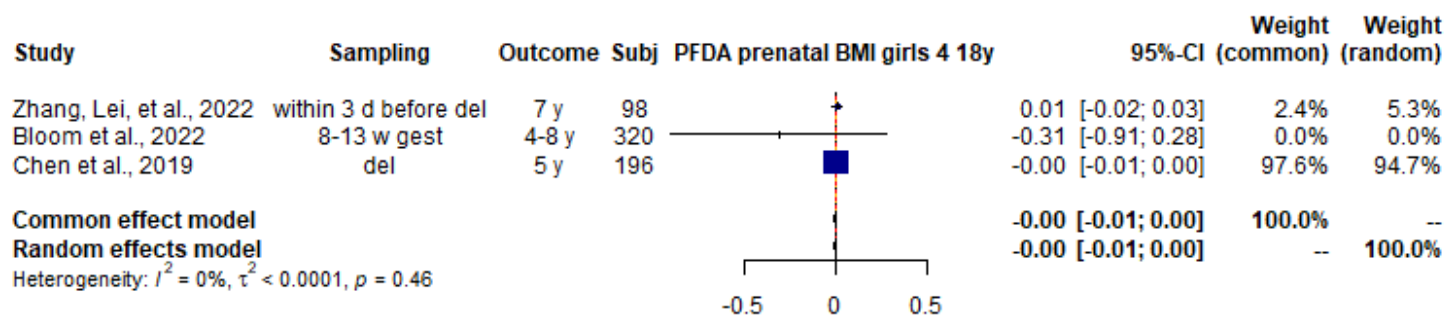

# Prenatal and childhood exposure to per-/polyfluoroalkyl substances (PFASs) and its associations with childhood overweight and/or obesity: a systematic review with meta-analyses

Gianfranco Frigerio, Chiara Matilde Ferrari, and Silvia Fustinoni

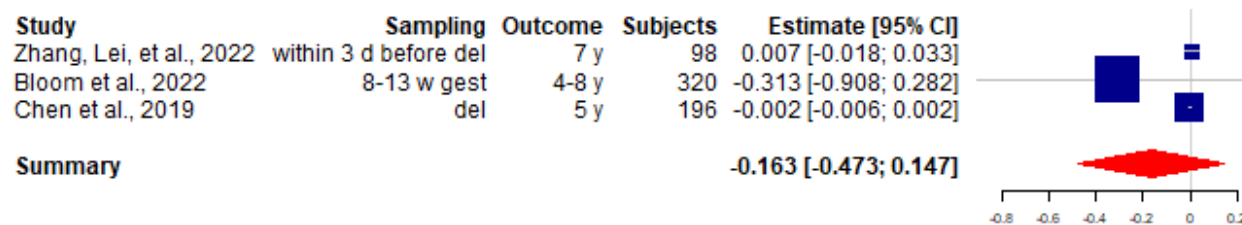

Prenatal and childhood exposure to per-/polyfluoroalkyl substances (PFASs) and its associations with childhood overweight and/or obesity: a systematic review with meta-analyses

Gianfranco Frigerio, Chiara Matilde Ferrari, and Silvia Fustinoni

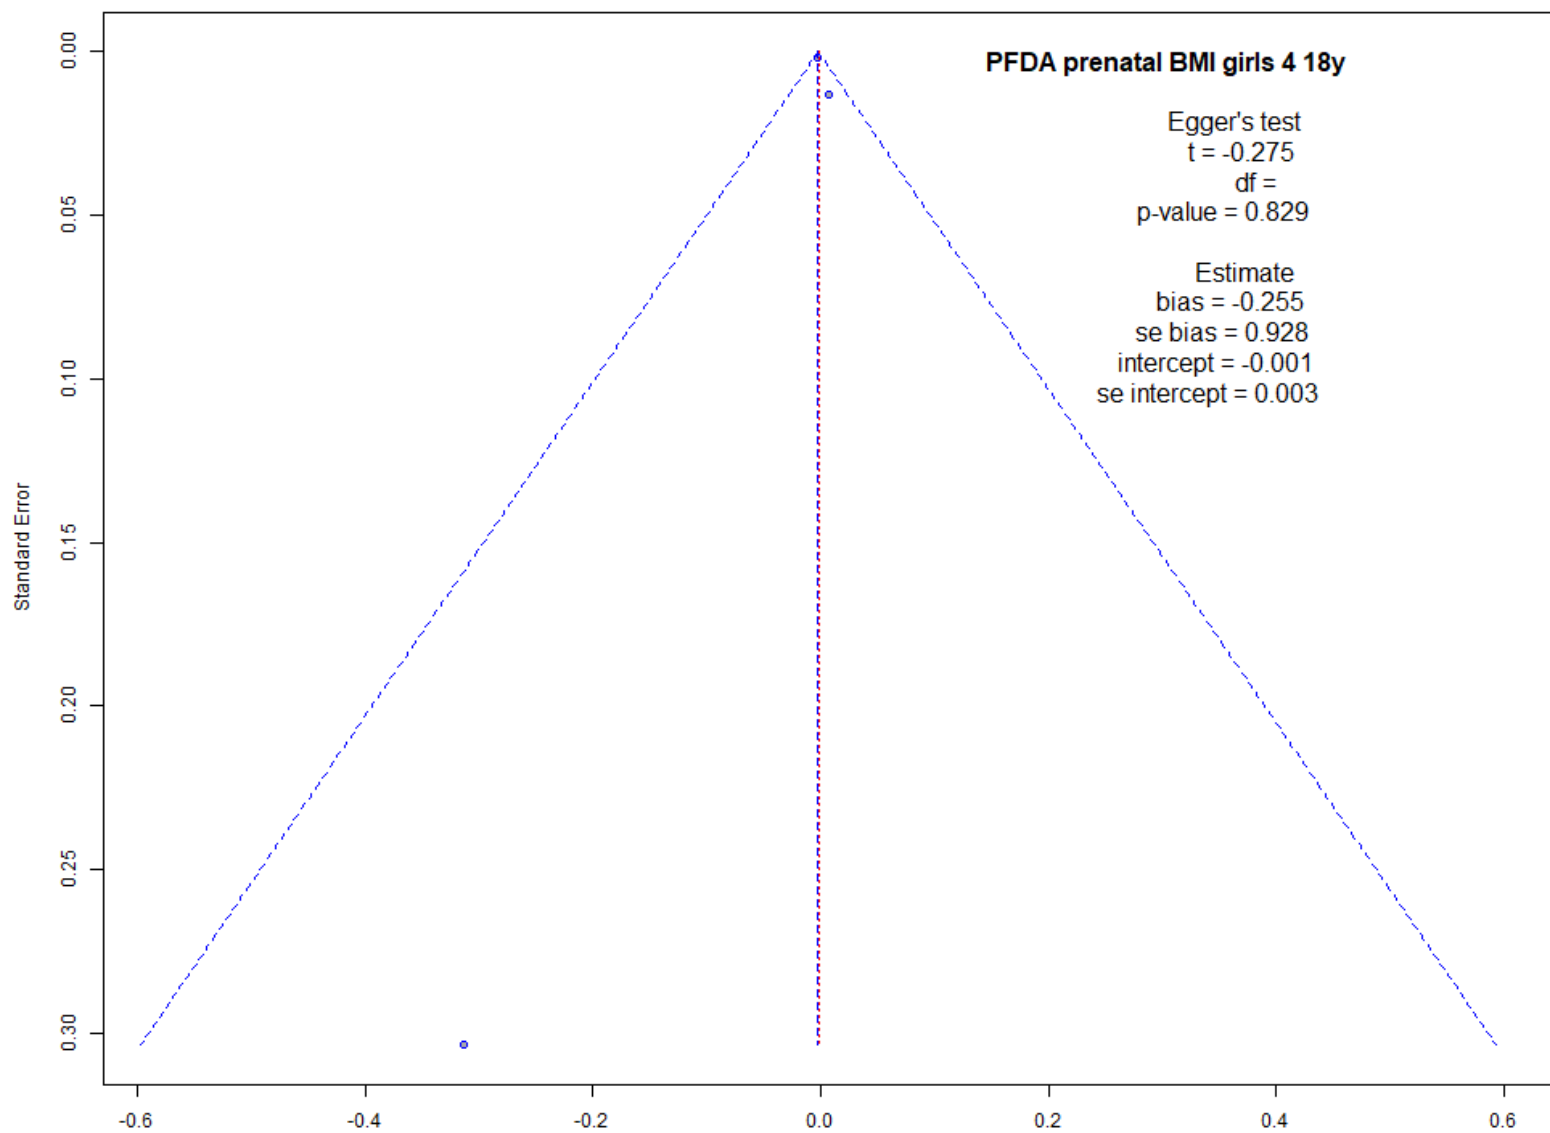



**Prenatal and childhood exposure to per-/polyfluoroalkyl substances (PFASs) and its associations with childhood overweight and/or obesity: a systematic review with meta-analyses**

Gianfranco Frigerio, Chiara Matilde Ferrari, and Silvia Fustinoni

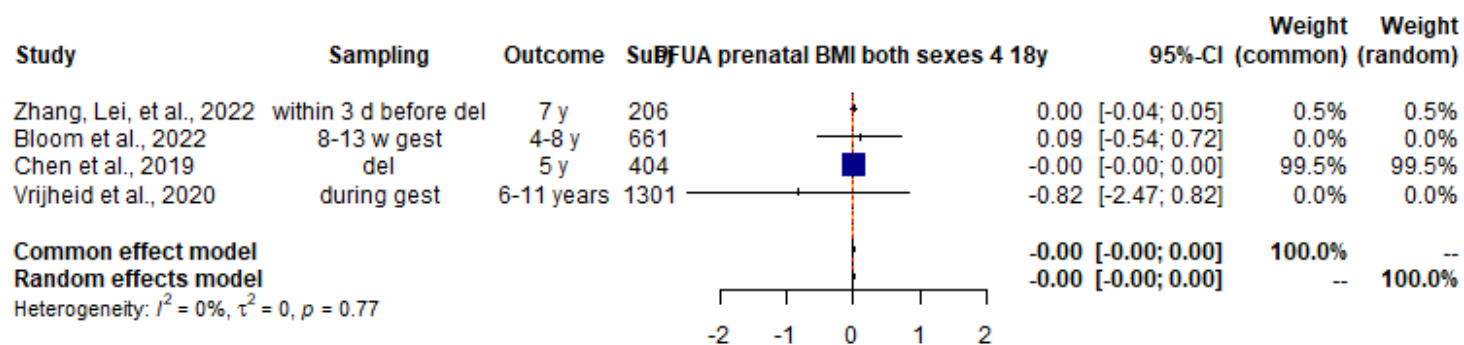

# Prenatal and childhood exposure to per-/polyfluoroalkyl substances (PFASs) and its associations with childhood overweight and/or obesity: a systematic review with meta-analyses

Gianfranco Frigerio, Chiara Matilde Ferrari, and Silvia Fustinoni

| Study                    | Sampling              | Outcome    | Subjects | Estimate [95% CI]             |
|--------------------------|-----------------------|------------|----------|-------------------------------|
| Zhang, Lei, et al., 2022 | within 3 d before del | 7 y        | 206      | 0.005 [-0.041; 0.051]         |
| Bloom et al., 2022       | 8-13 w gest           | 4-8 y      | 661      | 0.090 [-0.538; 0.717]         |
| Chen et al., 2019        | del                   | 5 y        | 404      | -0.002 [-0.005; 0.002]        |
| Vrijheid et al., 2020    | during gest           | 6-11 years | 1301     | -0.823 [-2.469; 0.823]        |
| <b>Summary</b>           |                       |            |          | <b>-0.393 [-1.241; 0.455]</b> |

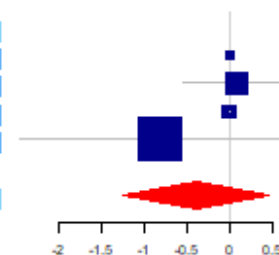

Prenatal and childhood exposure to per-/polyfluoroalkyl substances (PFASs) and its associations with childhood overweight and/or obesity: a systematic review with meta-analyses

Gianfranco Frigerio, Chiara Matilde Ferrari, and Silvia Fustinoni

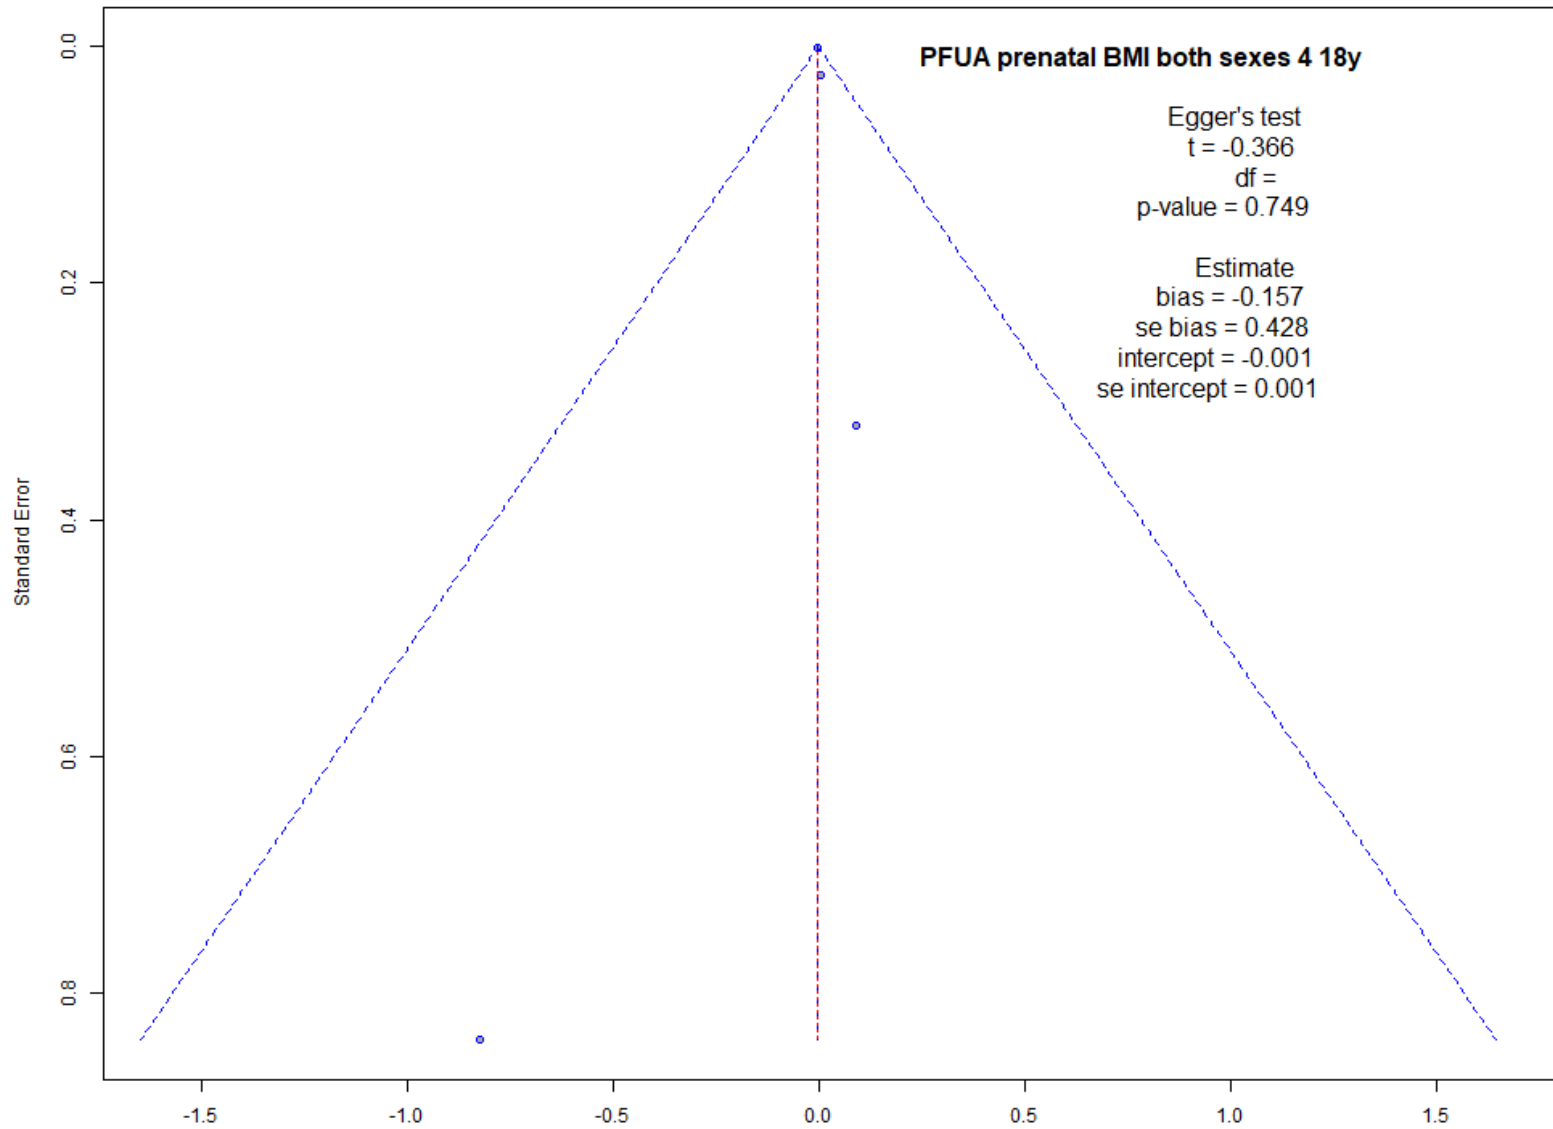

**Prenatal and childhood exposure to per-/polyfluoroalkyl substances (PFASs) and its associations with childhood overweight and/or obesity: a systematic review with meta-analyses**

Gianfranco Frigerio, Chiara Matilde Ferrari, and Silvia Fustinoni

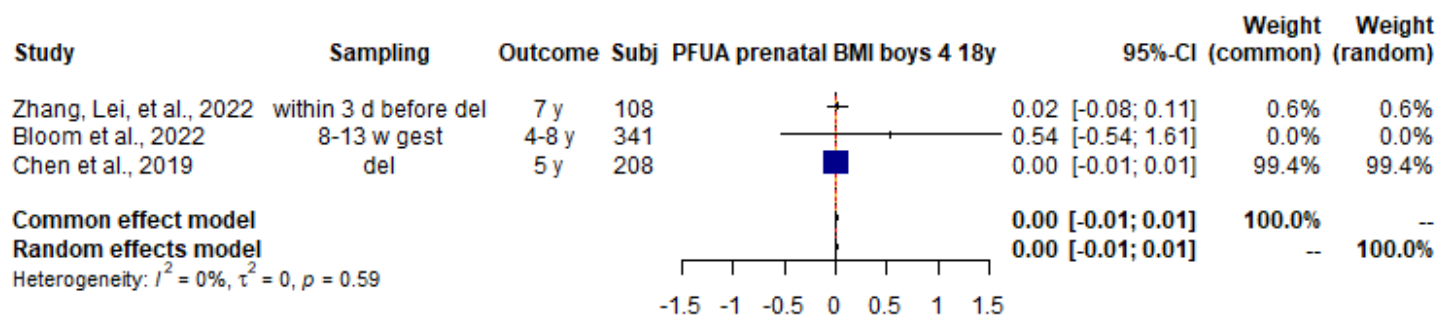

# Prenatal and childhood exposure to per-/polyfluoroalkyl substances (PFASs) and its associations with childhood overweight and/or obesity: a systematic review with meta-analyses

Gianfranco Frigerio, Chiara Matilde Ferrari, and Silvia Fustinoni

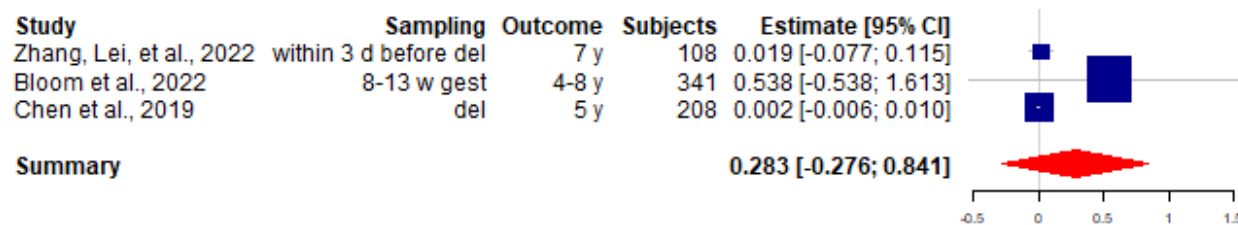

Prenatal and childhood exposure to per-/polyfluoroalkyl substances (PFASs) and its associations with childhood overweight and/or obesity: a systematic review with meta-analyses

Gianfranco Frigerio, Chiara Matilde Ferrari, and Silvia Fustinoni

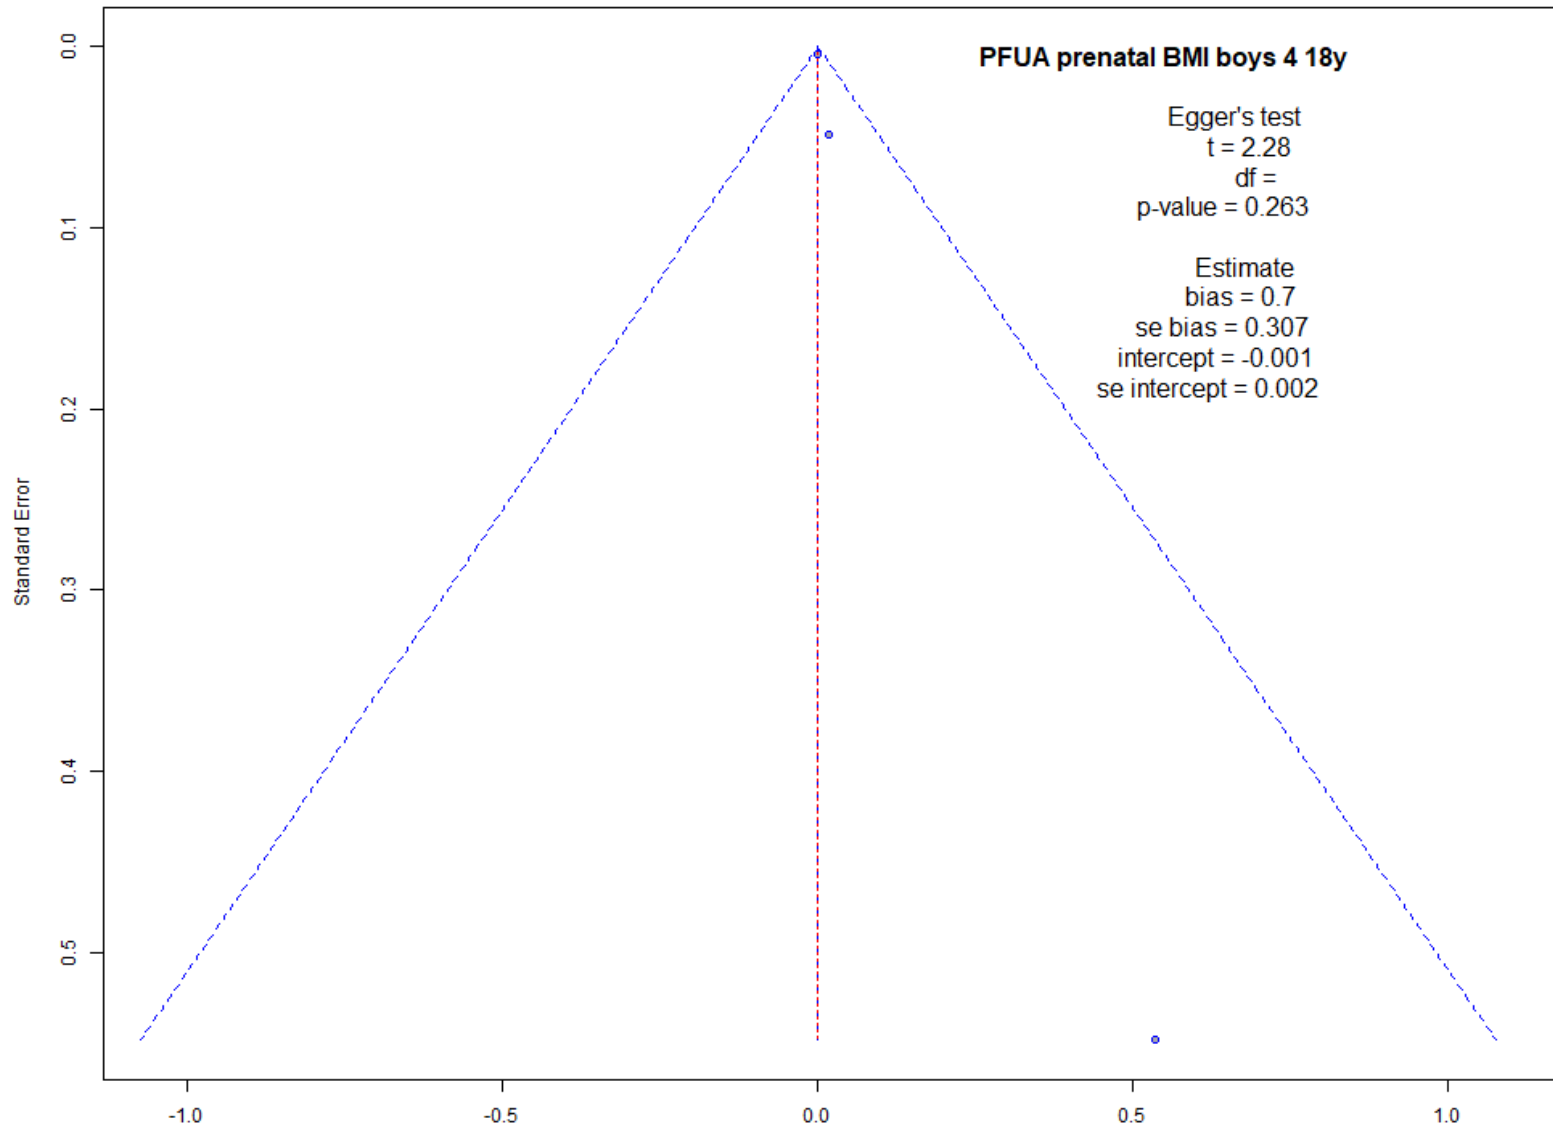

**Prenatal and childhood exposure to per-/polyfluoroalkyl substances (PFASs) and its associations with childhood overweight and/or obesity: a systematic review with meta-analyses**

Gianfranco Frigerio, Chiara Matilde Ferrari, and Silvia Fustinoni

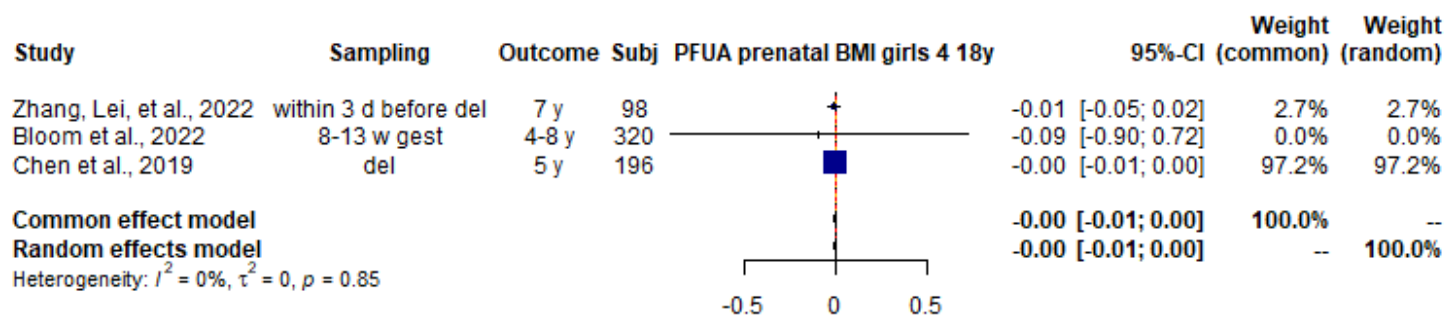

**Prenatal and childhood exposure to per-/polyfluoroalkyl substances (PFASs) and its associations with childhood overweight and/or obesity: a systematic review with meta-analyses**

Gianfranco Frigerio, Chiara Matilde Ferrari, and Silvia Fustinoni

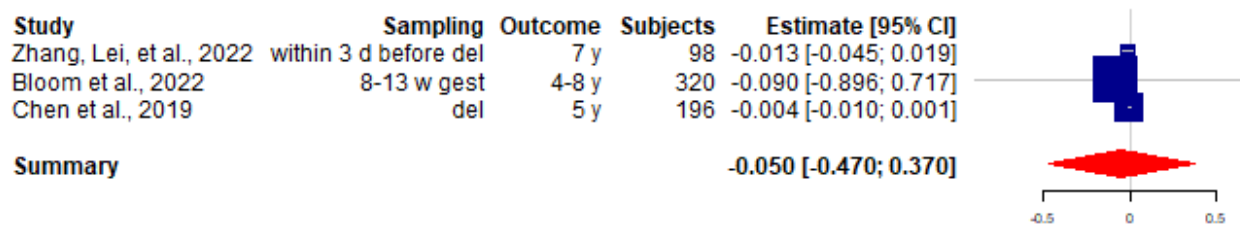



Prenatal and childhood exposure to per-/polyfluoroalkyl substances (PFASs) and its associations with childhood overweight and/or obesity: a systematic review with meta-analyses

Gianfranco Frigerio, Chiara Matilde Ferrari, and Silvia Fustinoni

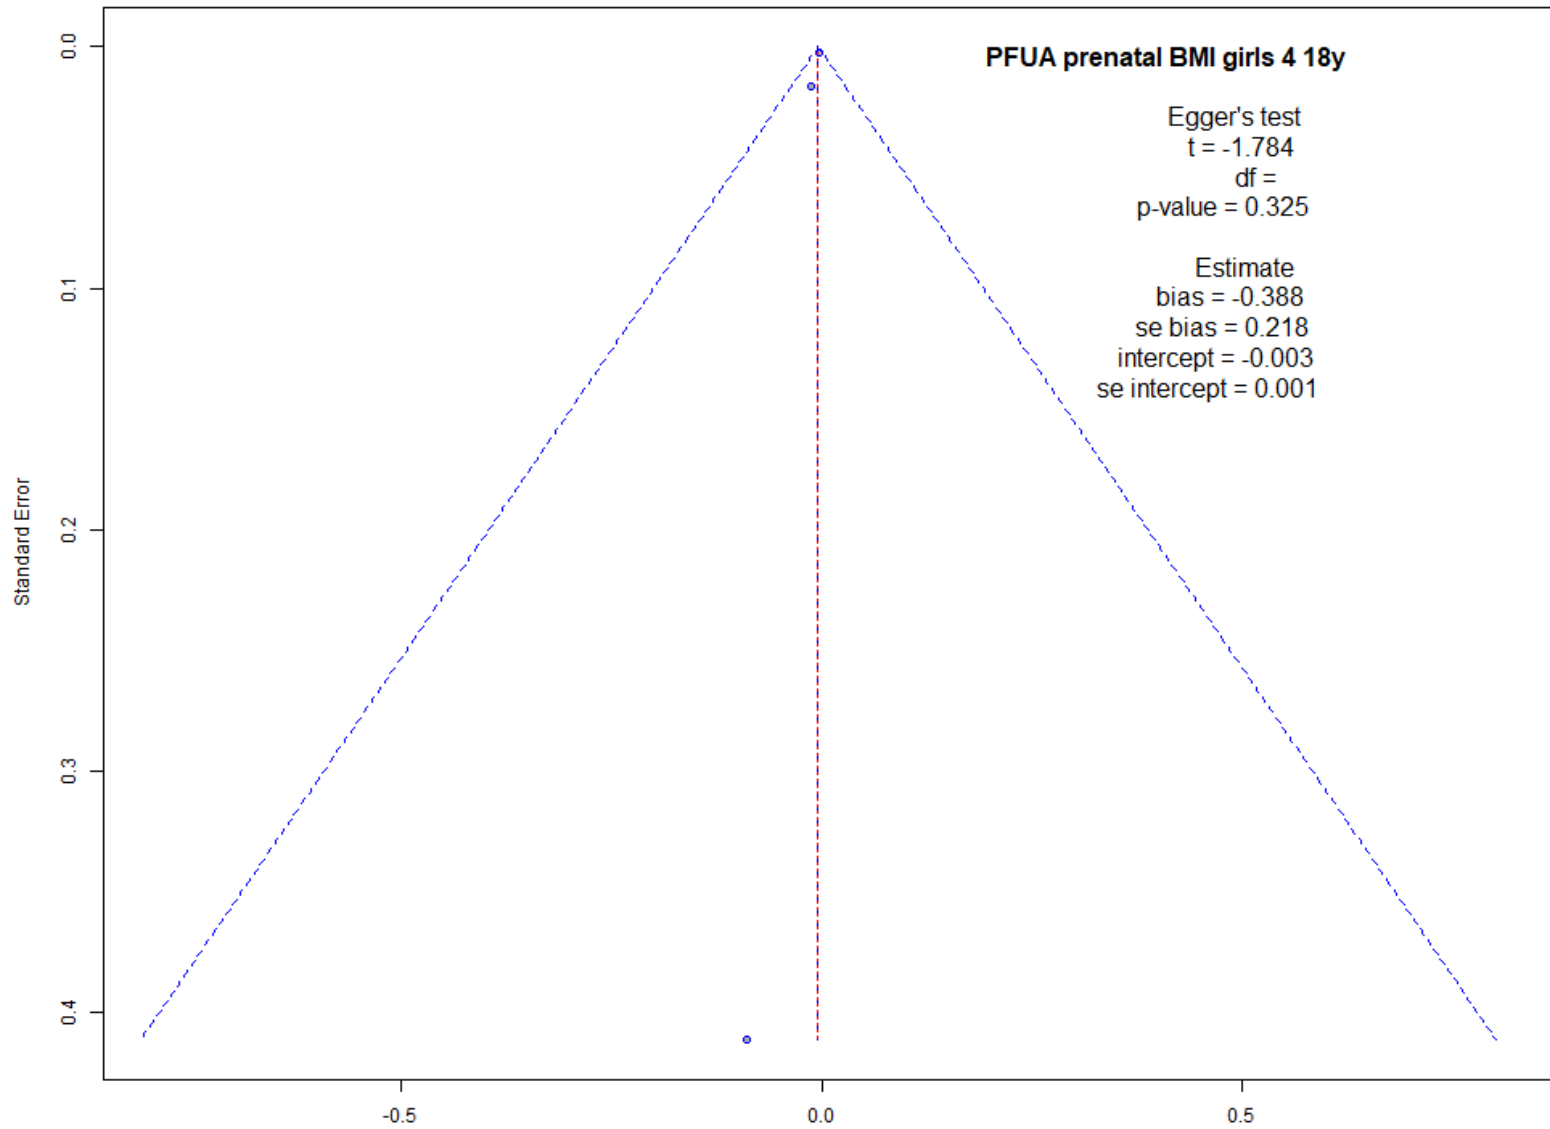

# Prenatal and childhood exposure to per-/polyfluoroalkyl substances (PFASs) and its associations with childhood overweight and/or obesity: a systematic review with meta-analyses

Gianfranco Frigerio, Chiara Matilde Ferrari, and Silvia Fustinoni

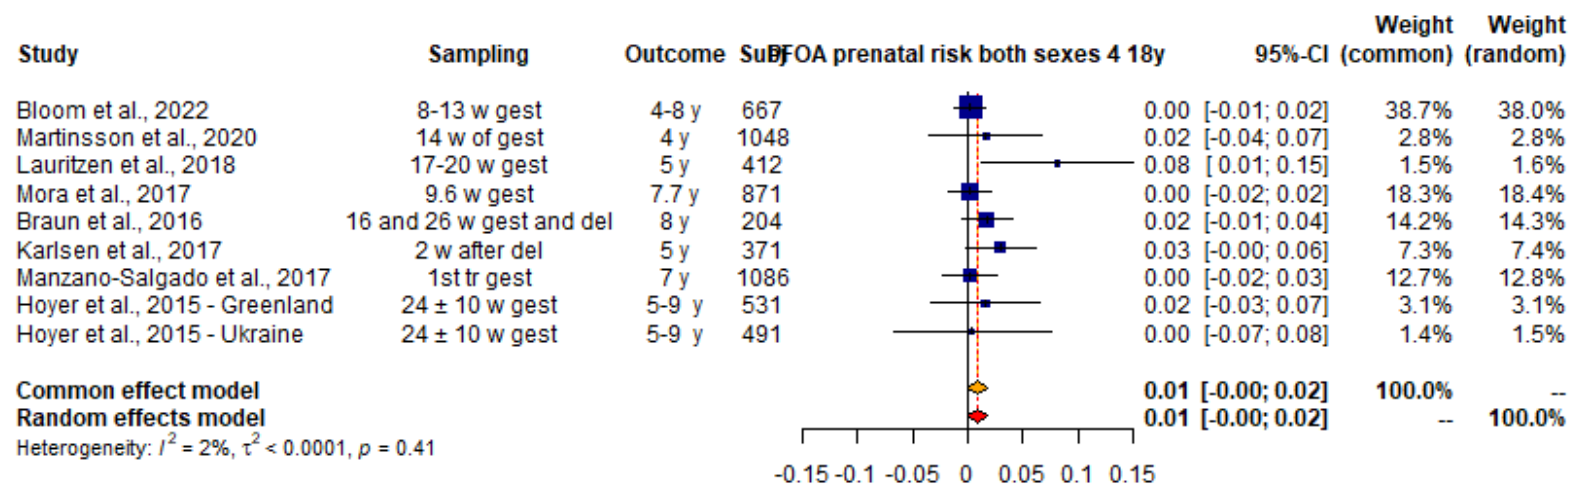

# Prenatal and childhood exposure to per-/polyfluoroalkyl substances (PFASs) and its associations with childhood overweight and/or obesity: a systematic review with meta-analyses

Gianfranco Frigerio, Chiara Matilde Ferrari, and Silvia Fustinoni

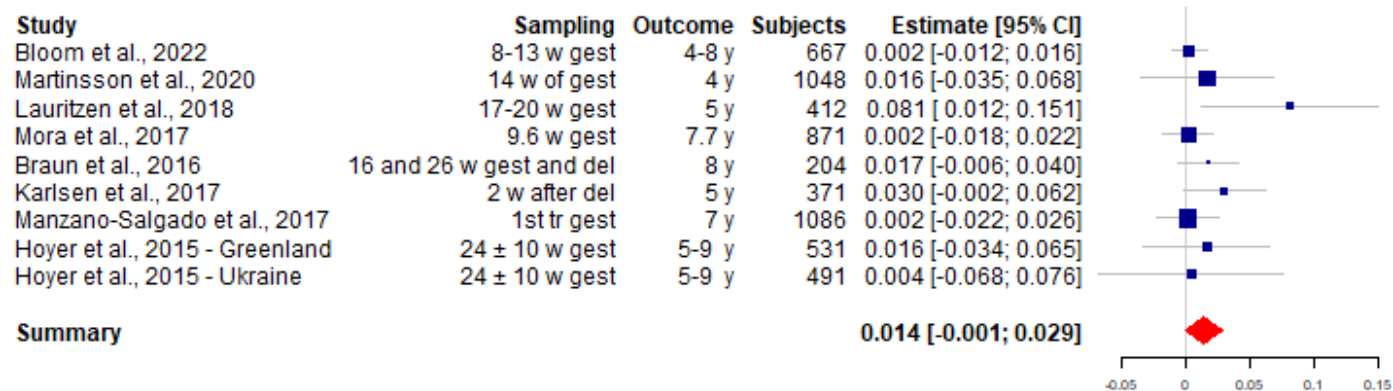

Prenatal and childhood exposure to per-/polyfluoroalkyl substances (PFASs) and its associations with childhood overweight and/or obesity: a systematic review with meta-analyses

Gianfranco Frigerio, Chiara Matilde Ferrari, and Silvia Fustinoni

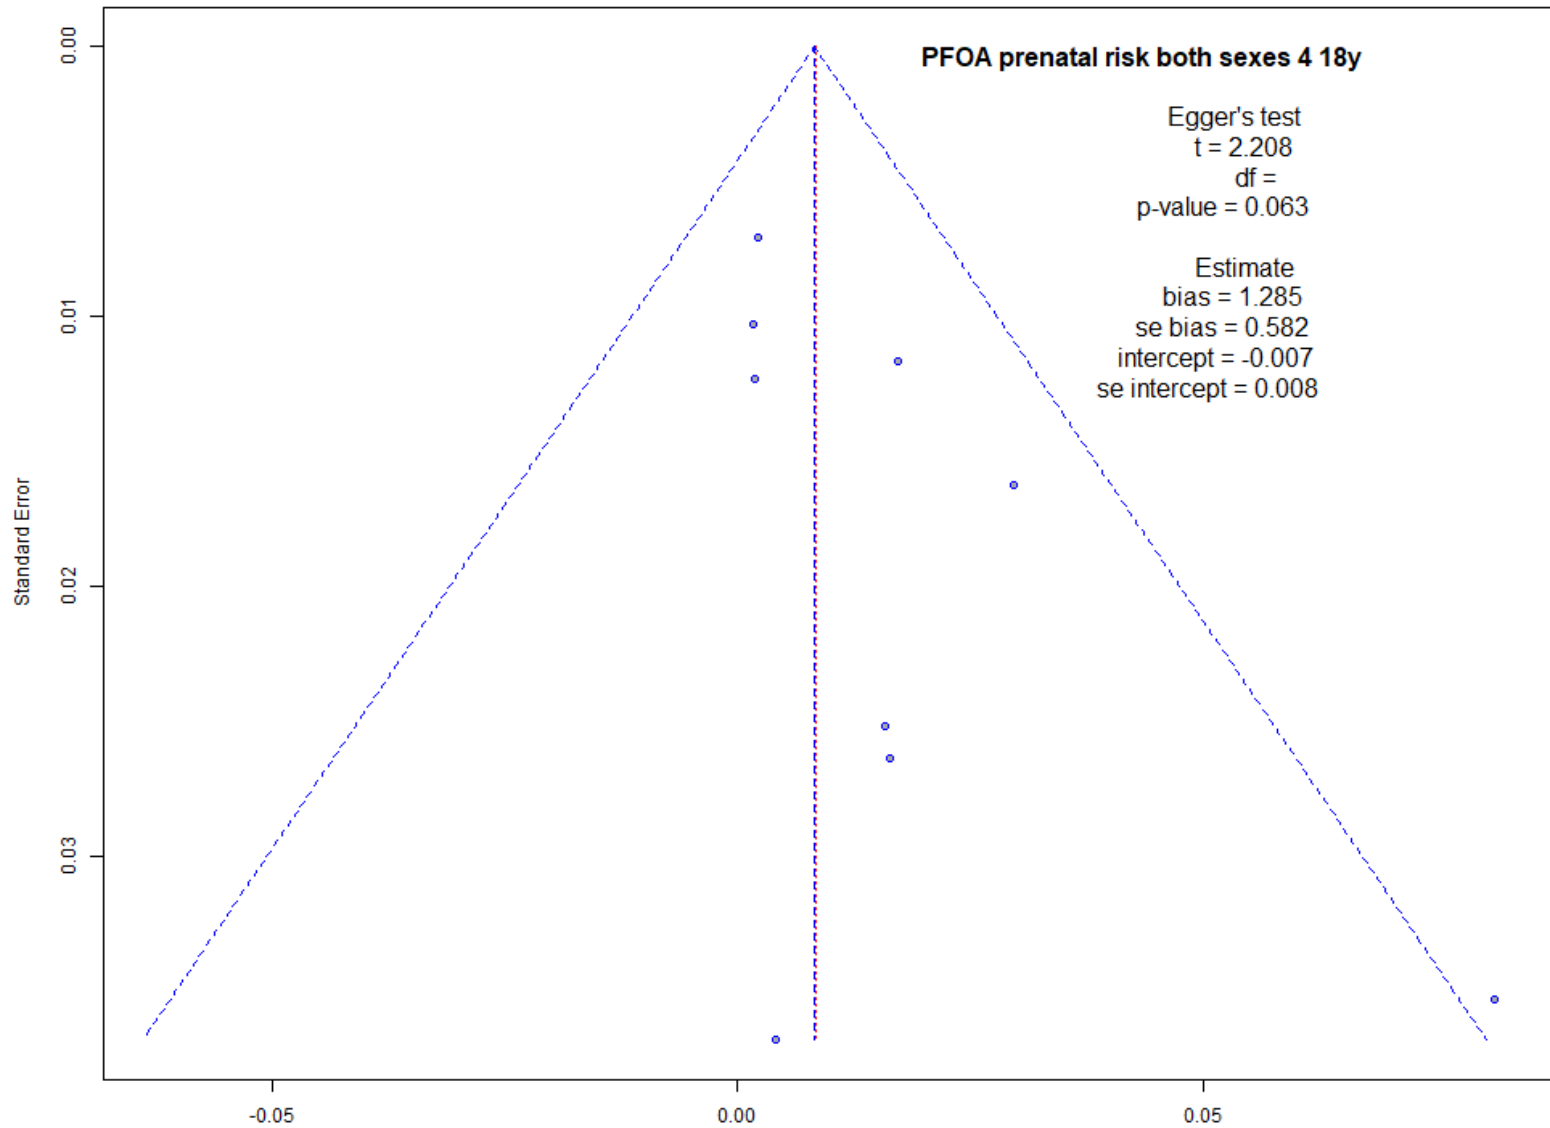

**Prenatal and childhood exposure to per-/polyfluoroalkyl substances (PFASs) and its associations with childhood overweight and/or obesity: a systematic review with meta-analyses**

Gianfranco Frigerio, Chiara Matilde Ferrari, and Silvia Fustinoni

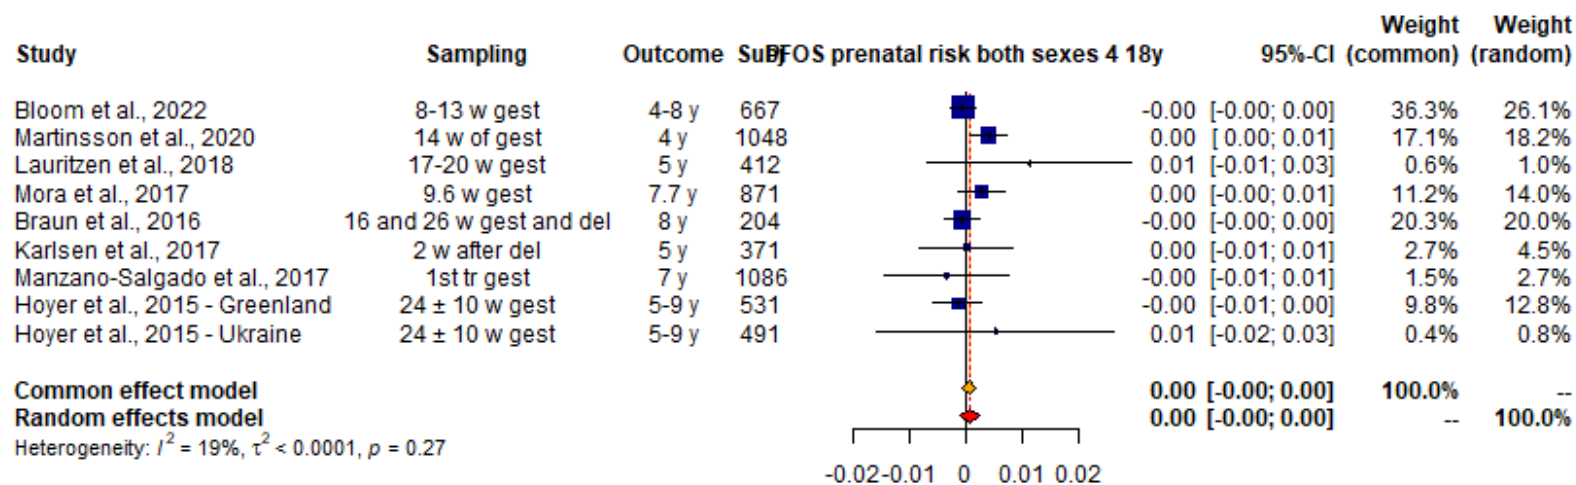

**Prenatal and childhood exposure to per-/polyfluoroalkyl substances (PFASs) and its associations with childhood overweight and/or obesity: a systematic review with meta-analyses**

Gianfranco Frigerio, Chiara Matilde Ferrari, and Silvia Fustinoni



Prenatal and childhood exposure to per-/polyfluoroalkyl substances (PFASs) and its associations with childhood overweight and/or obesity: a systematic review with meta-analyses

Gianfranco Frigerio, Chiara Matilde Ferrari, and Silvia Fustinoni

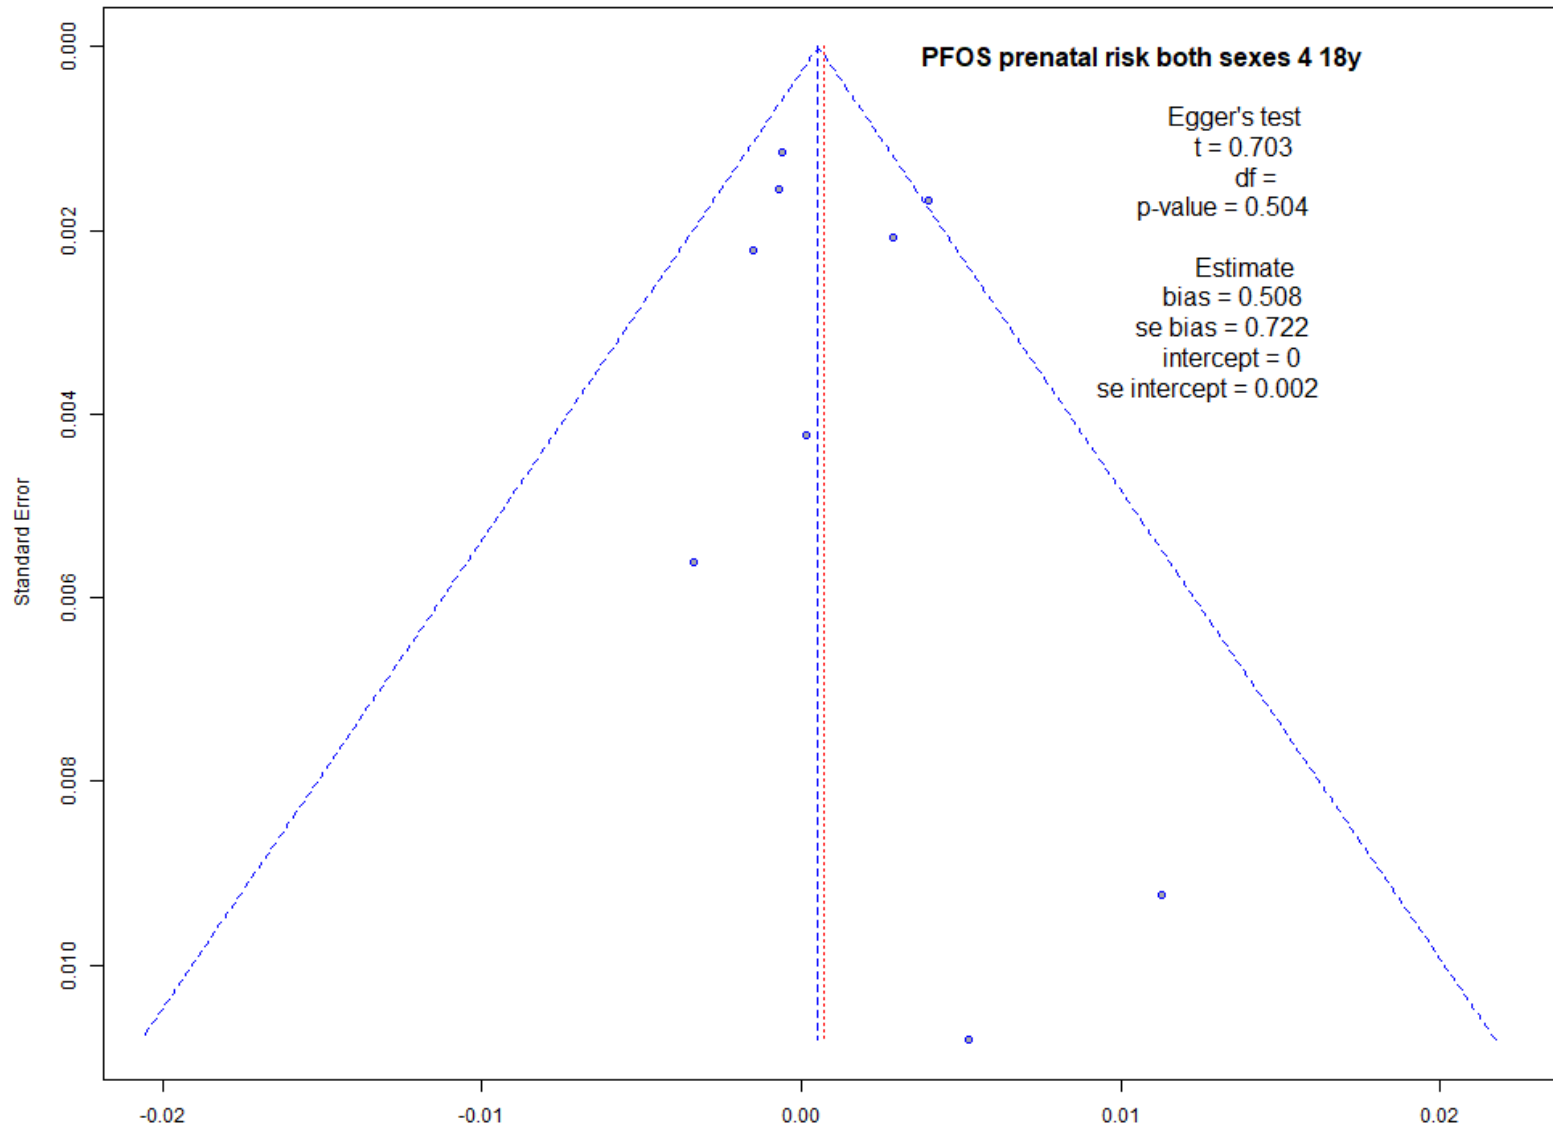

**Prenatal and childhood exposure to per-/polyfluoroalkyl substances (PFASs) and its associations with childhood overweight and/or obesity: a systematic review with meta-analyses**

Gianfranco Frigerio, Chiara Matilde Ferrari, and Silvia Fustinoni

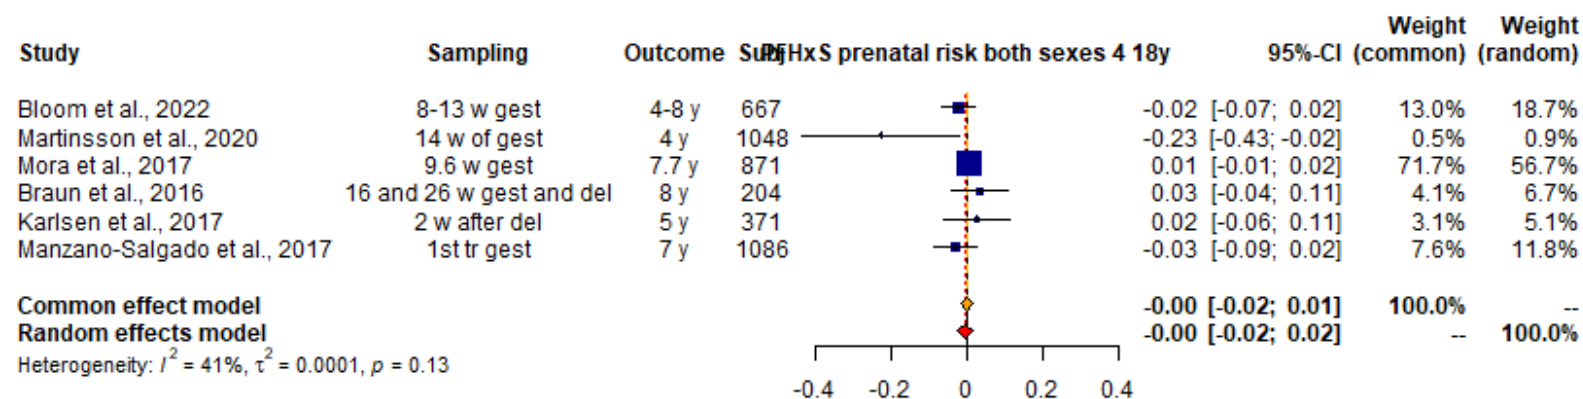



**Prenatal and childhood exposure to per-/polyfluoroalkyl substances (PFASs) and its associations with childhood overweight and/or obesity: a systematic review with meta-analyses**

Gianfranco Frigerio, Chiara Matilde Ferrari, and Silvia Fustinoni



Prenatal and childhood exposure to per-/polyfluoroalkyl substances (PFASs) and its associations with childhood overweight and/or obesity: a systematic review with meta-analyses

Gianfranco Frigerio, Chiara Matilde Ferrari, and Silvia Fustinoni

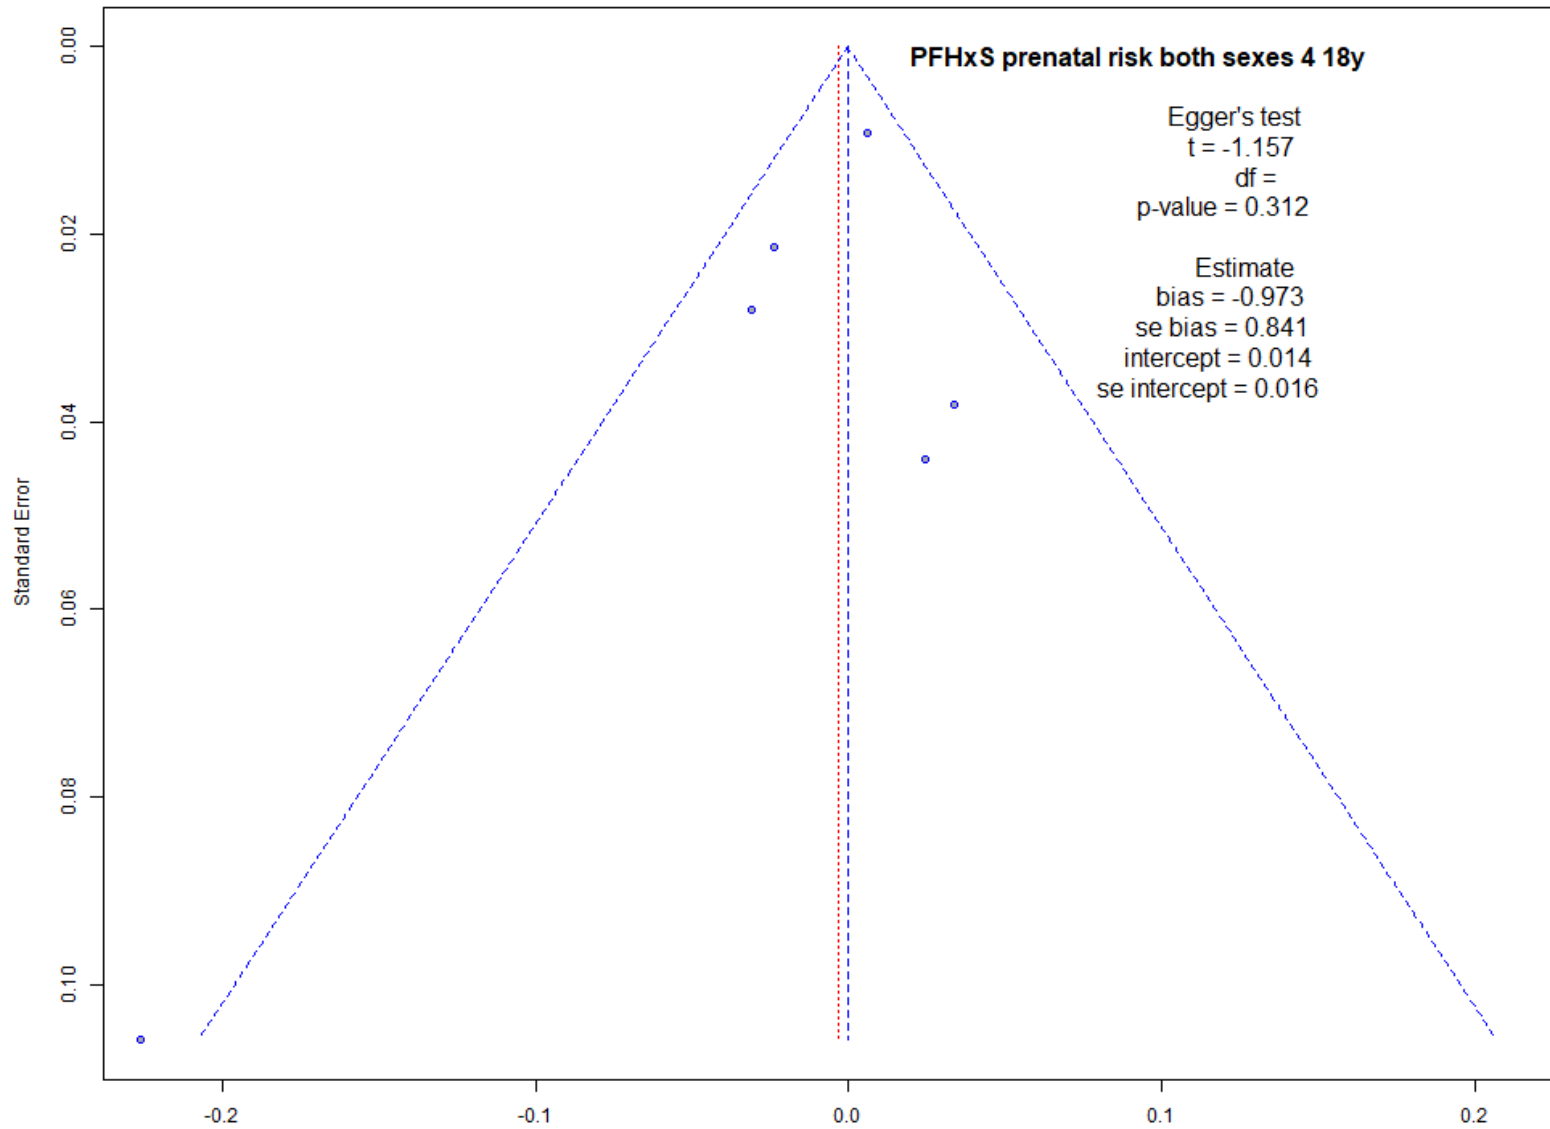

# Prenatal and childhood exposure to per-/polyfluoroalkyl substances (PFASs) and its associations with childhood overweight and/or obesity: a systematic review with meta-analyses

Gianfranco Frigerio, Chiara Matilde Ferrari, and Silvia Fustinoni

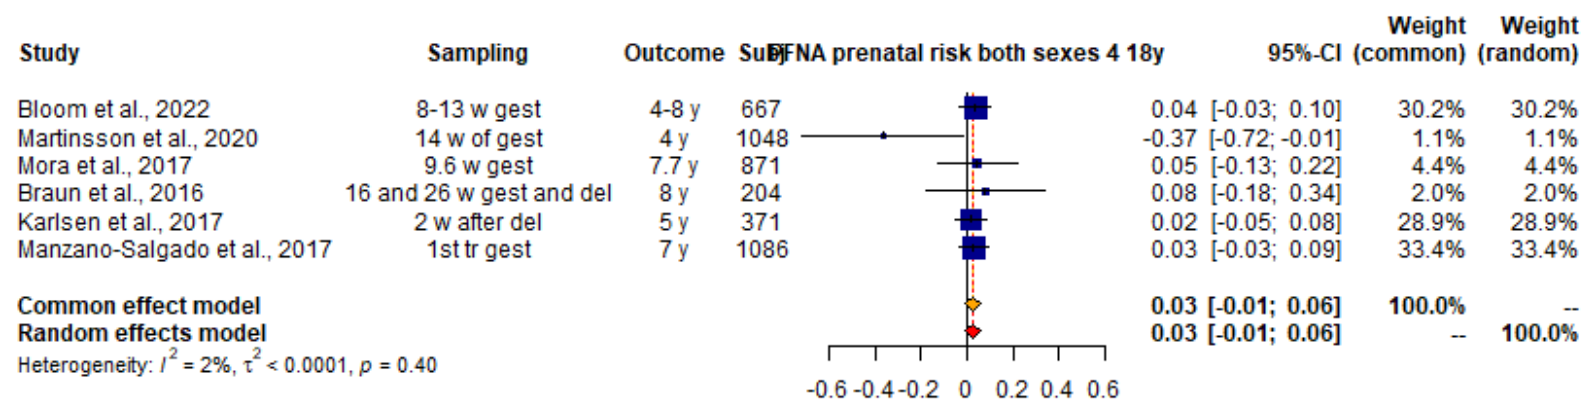

# Prenatal and childhood exposure to per-/polyfluoroalkyl substances (PFASs) and its associations with childhood overweight and/or obesity: a systematic review with meta-analyses

Gianfranco Frigerio, Chiara Matilde Ferrari, and Silvia Fustinoni

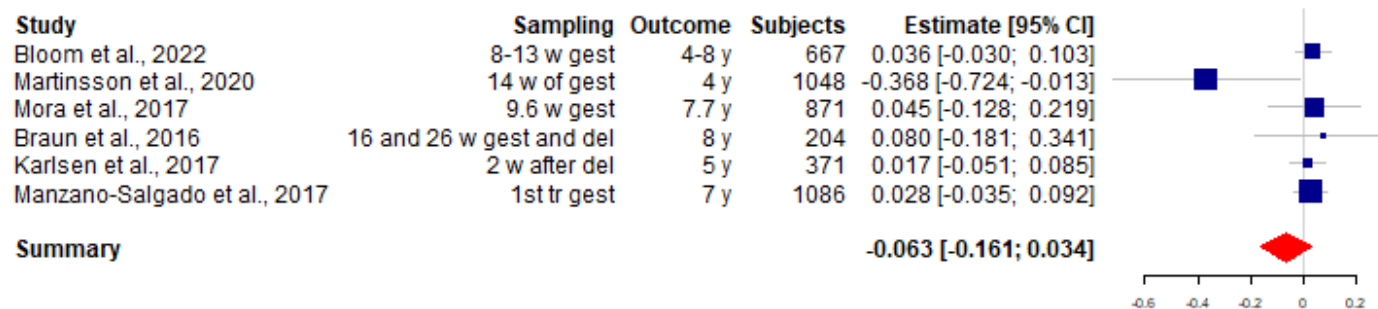

Prenatal and childhood exposure to per-/polyfluoroalkyl substances (PFASs) and its associations with childhood overweight and/or obesity: a systematic review with meta-analyses

Gianfranco Frigerio, Chiara Matilde Ferrari, and Silvia Fustinoni

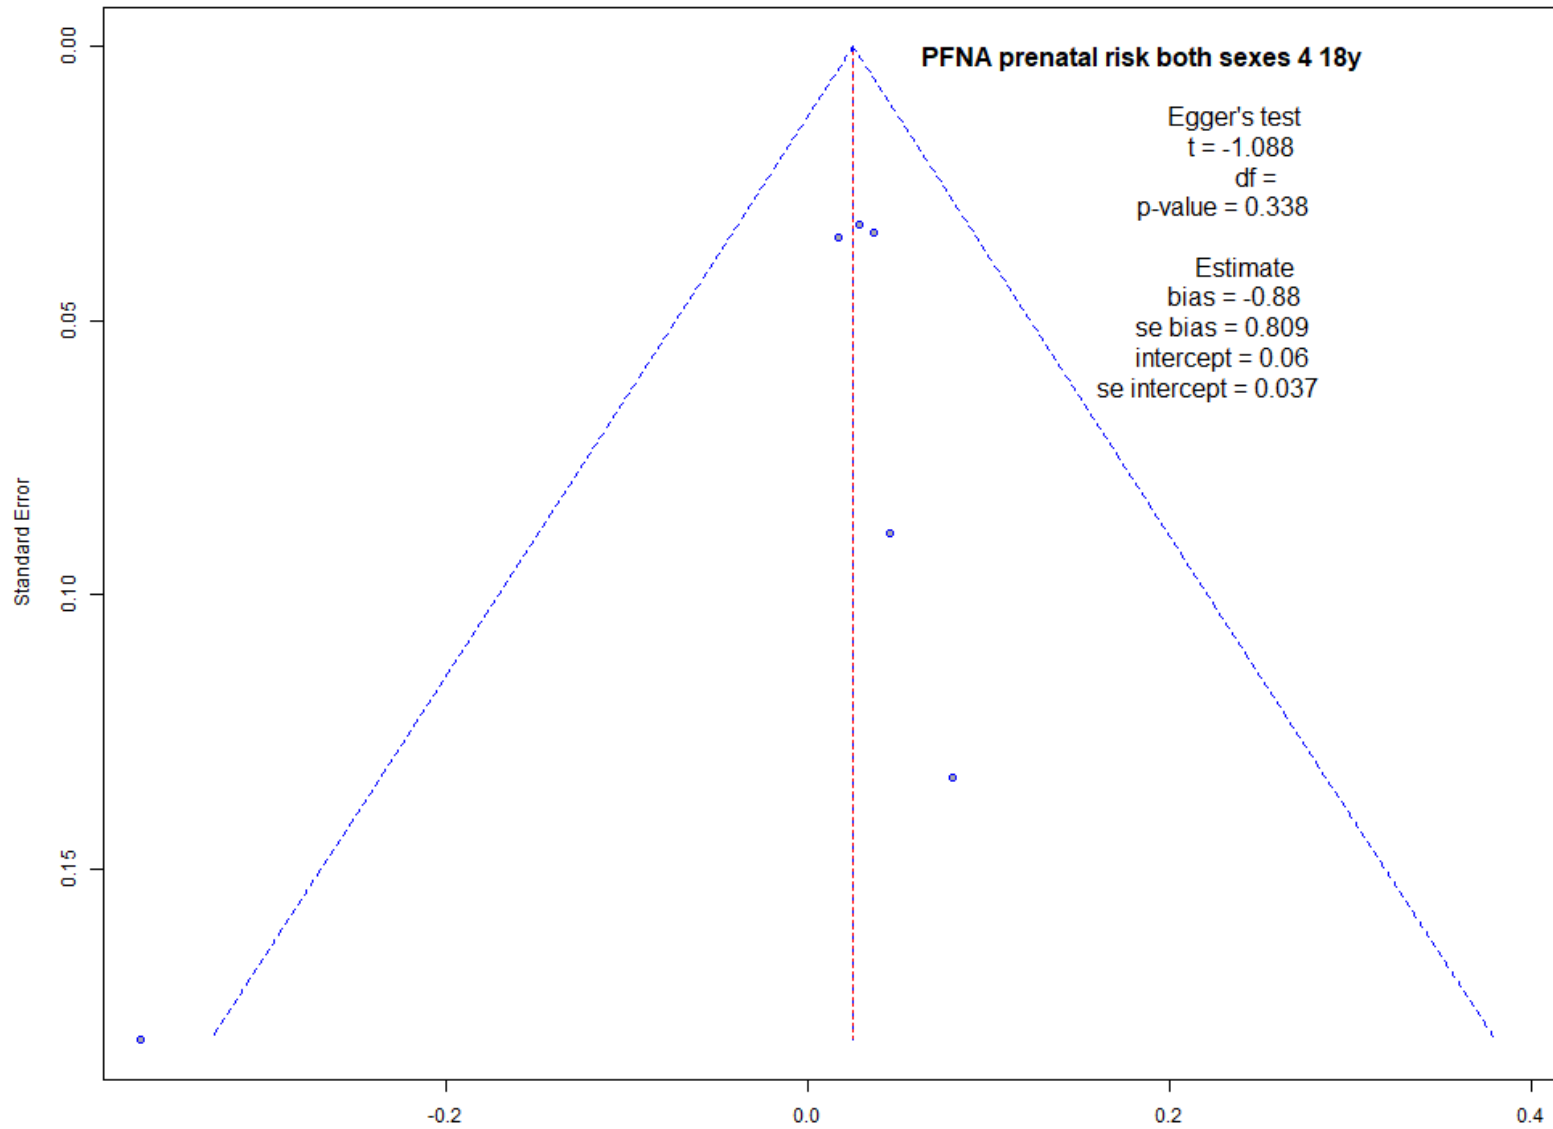

Prenatal and childhood exposure to per-/polyfluoroalkyl substances (PFASs) and its associations with childhood overweight and/or obesity: a systematic review with meta-analyses

Gianfranco Frigerio, Chiara Matilde Ferrari, and Silvia Fustinoni

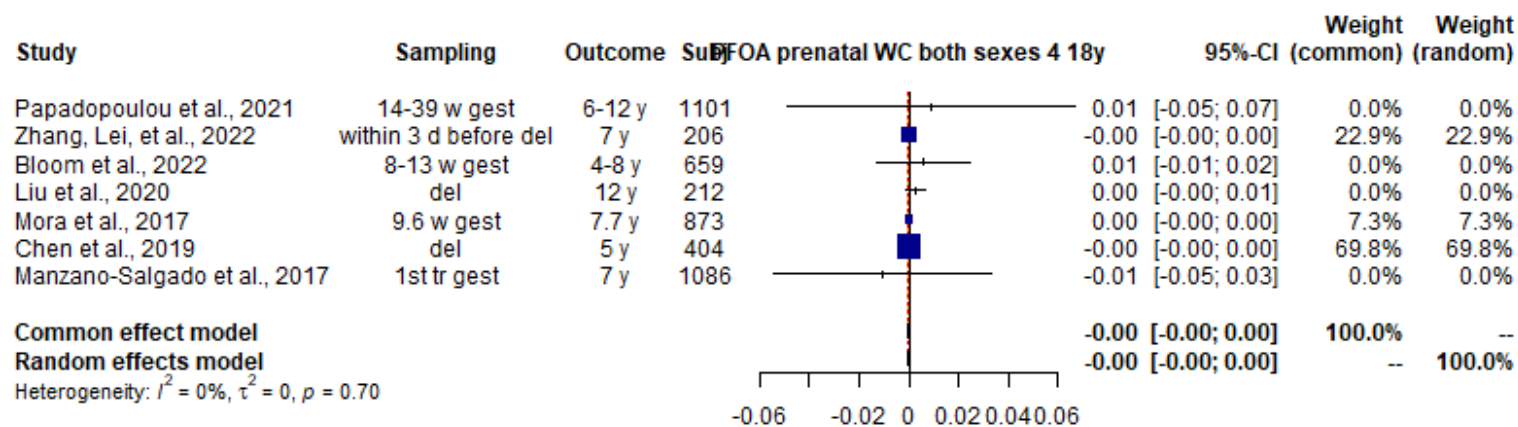

**Prenatal and childhood exposure to per-/polyfluoroalkyl substances (PFASs) and its associations with childhood overweight and/or obesity: a systematic review with meta-analyses**

Gianfranco Frigerio, Chiara Matilde Ferrari, and Silvia Fustinoni

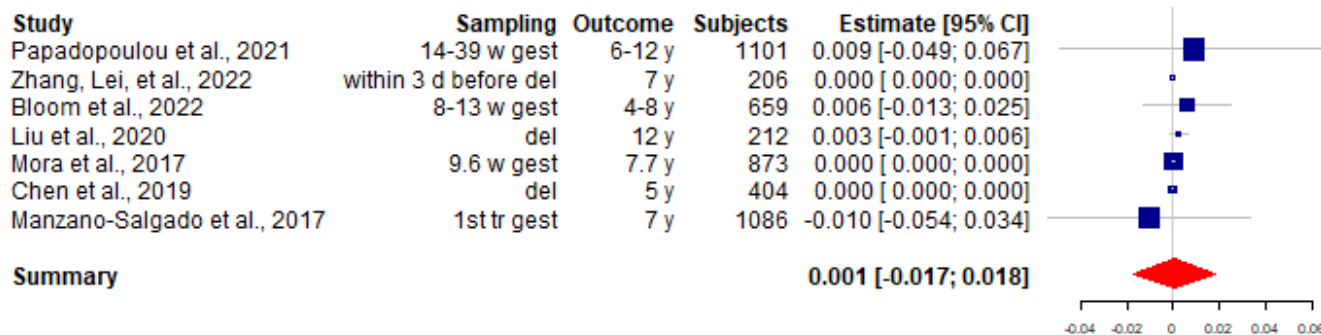

Prenatal and childhood exposure to per-/polyfluoroalkyl substances (PFASs) and its associations with childhood overweight and/or obesity: a systematic review with meta-analyses

Gianfranco Frigerio, Chiara Matilde Ferrari, and Silvia Fustinoni

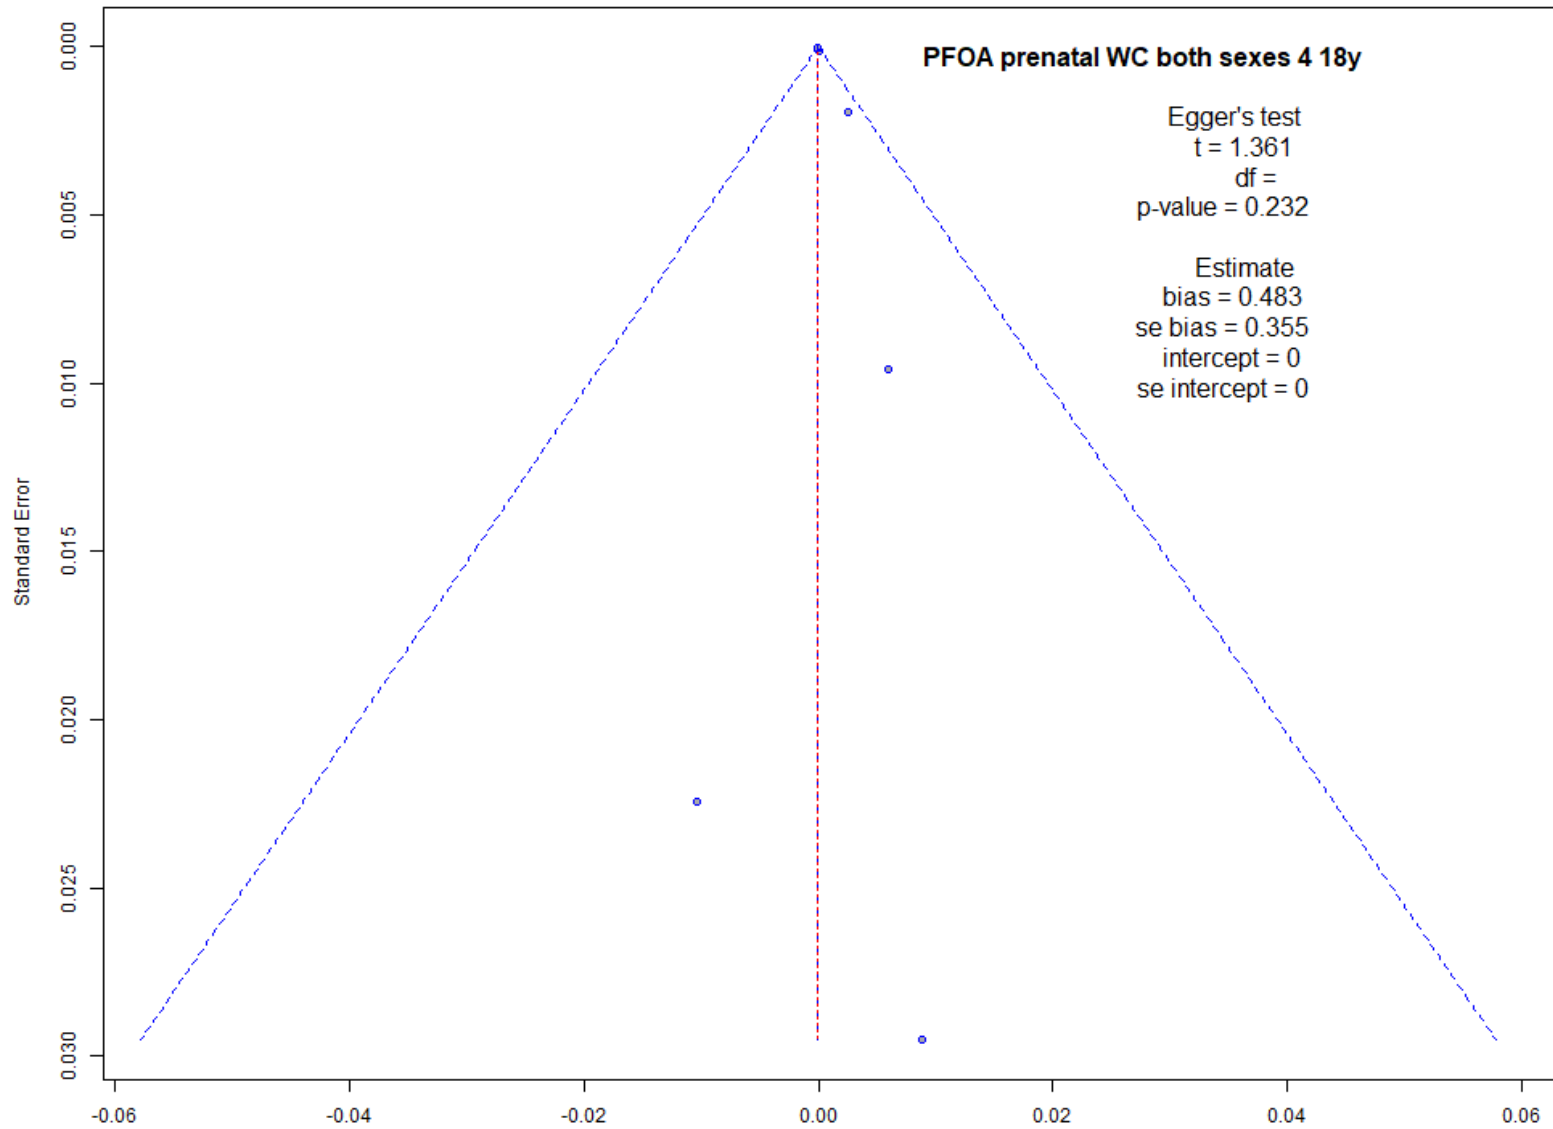



Prenatal and childhood exposure to per-/polyfluoroalkyl substances (PFASs) and its associations with childhood overweight and/or obesity: a systematic review with meta-analyses

Gianfranco Frigerio, Chiara Matilde Ferrari, and Silvia Fustinoni

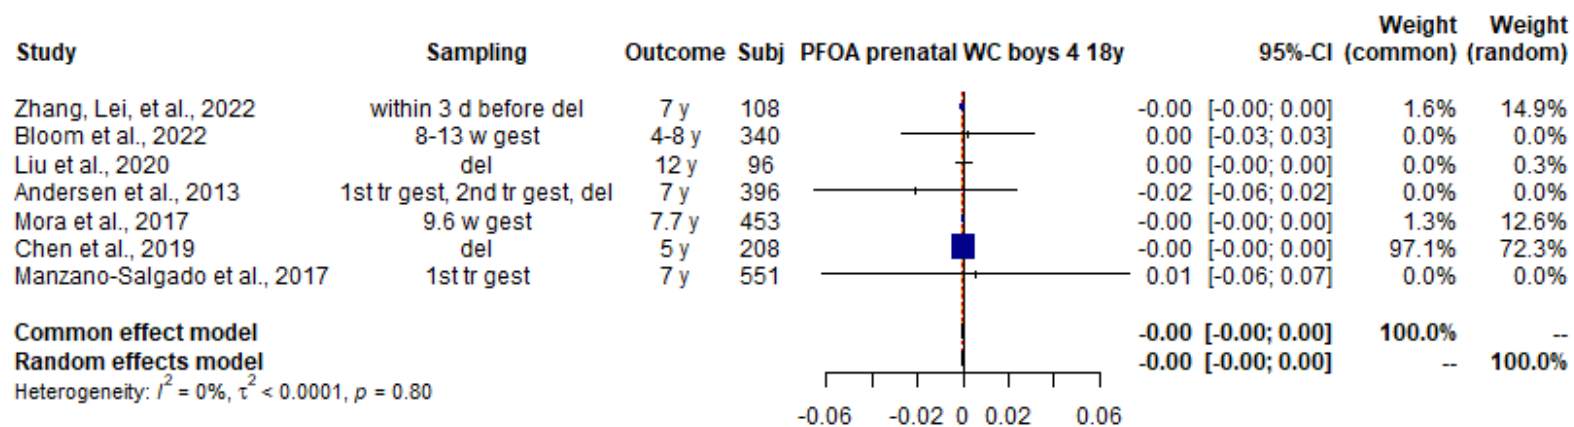

# Prenatal and childhood exposure to per-/polyfluoroalkyl substances (PFASs) and its associations with childhood overweight and/or obesity: a systematic review with meta-analyses

Gianfranco Frigerio, Chiara Matilde Ferrari, and Silvia Fustinoni

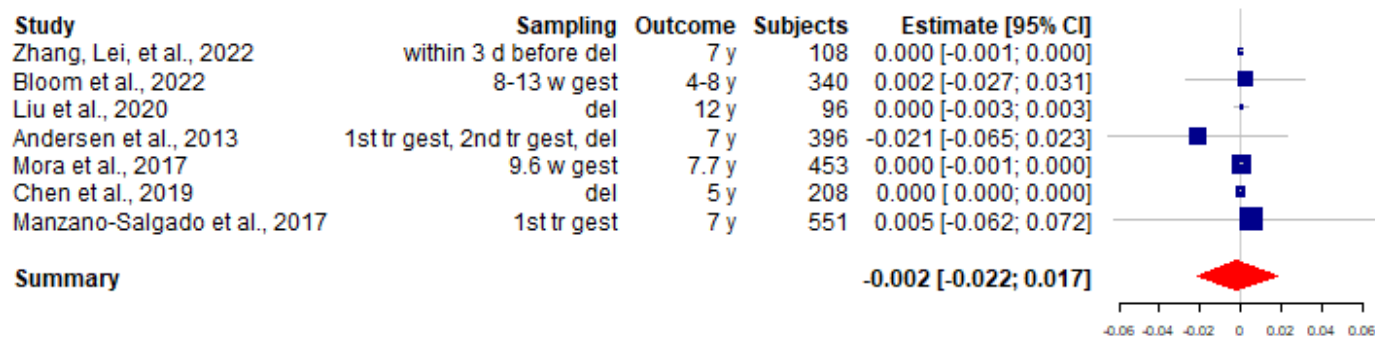

Prenatal and childhood exposure to per-/polyfluoroalkyl substances (PFASs) and its associations with childhood overweight and/or obesity: a systematic review with meta-analyses

Gianfranco Frigerio, Chiara Matilde Ferrari, and Silvia Fustinoni

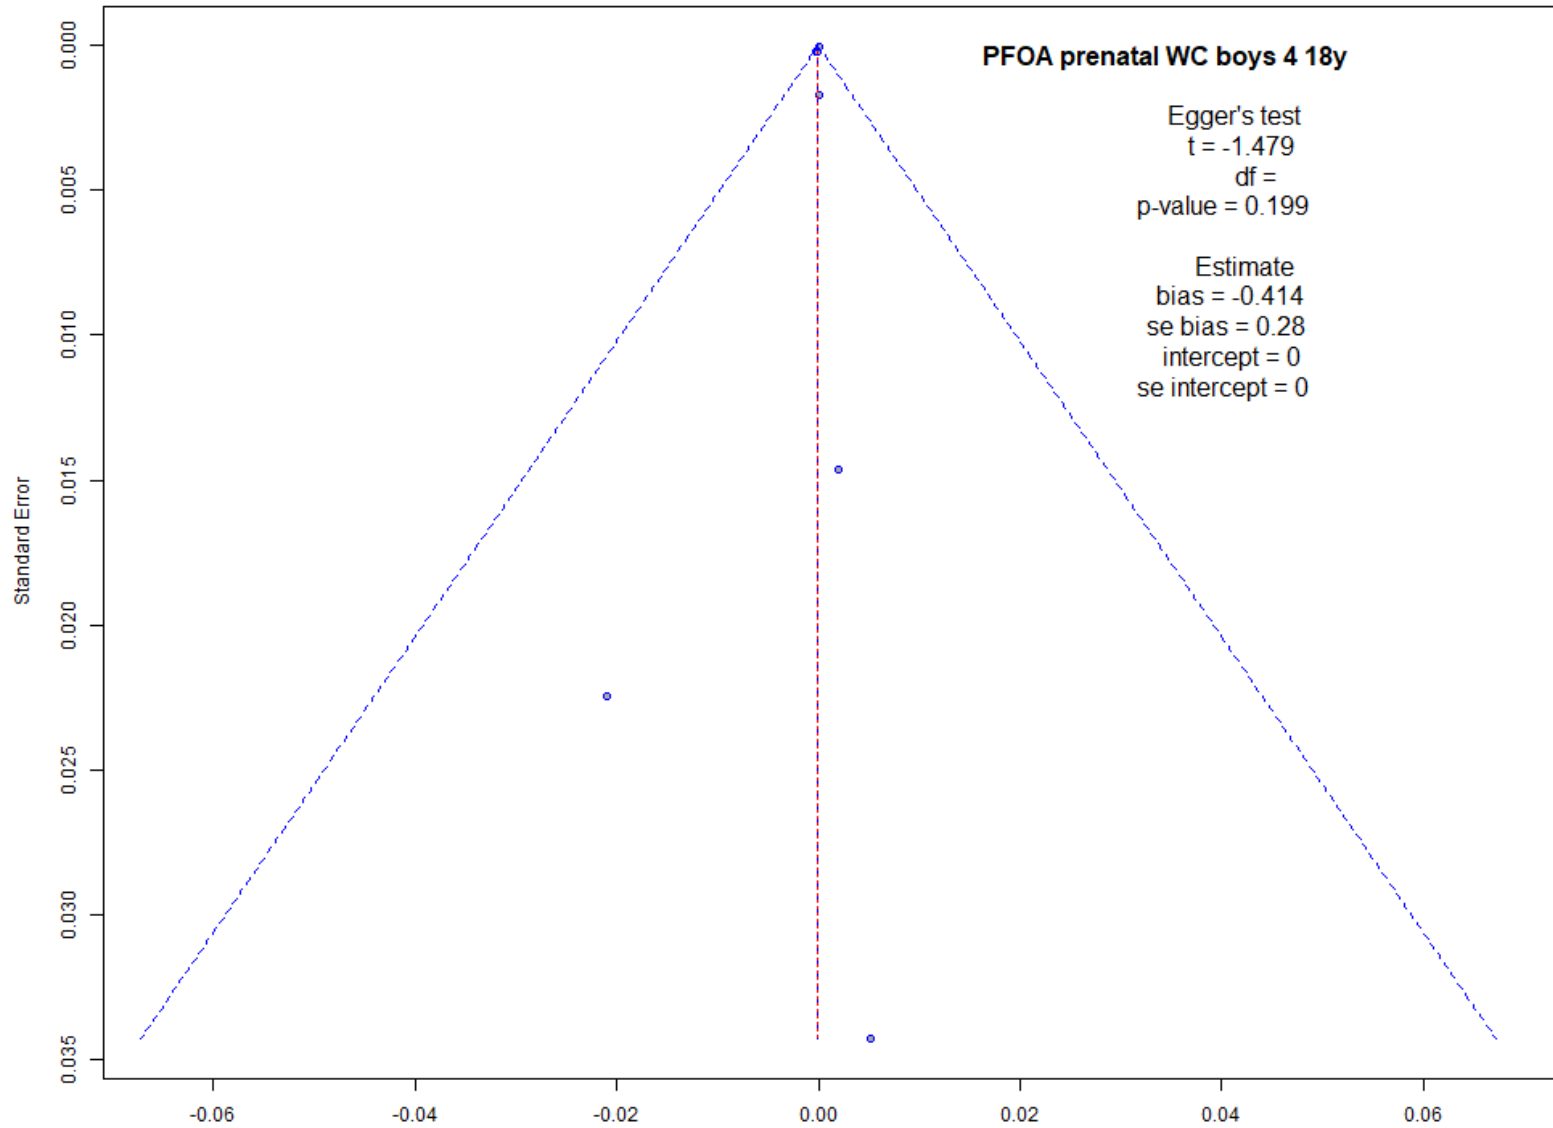

# Prenatal and childhood exposure to per-/polyfluoroalkyl substances (PFASs) and its associations with childhood overweight and/or obesity: a systematic review with meta-analyses

Gianfranco Frigerio, Chiara Matilde Ferrari, and Silvia Fustinoni

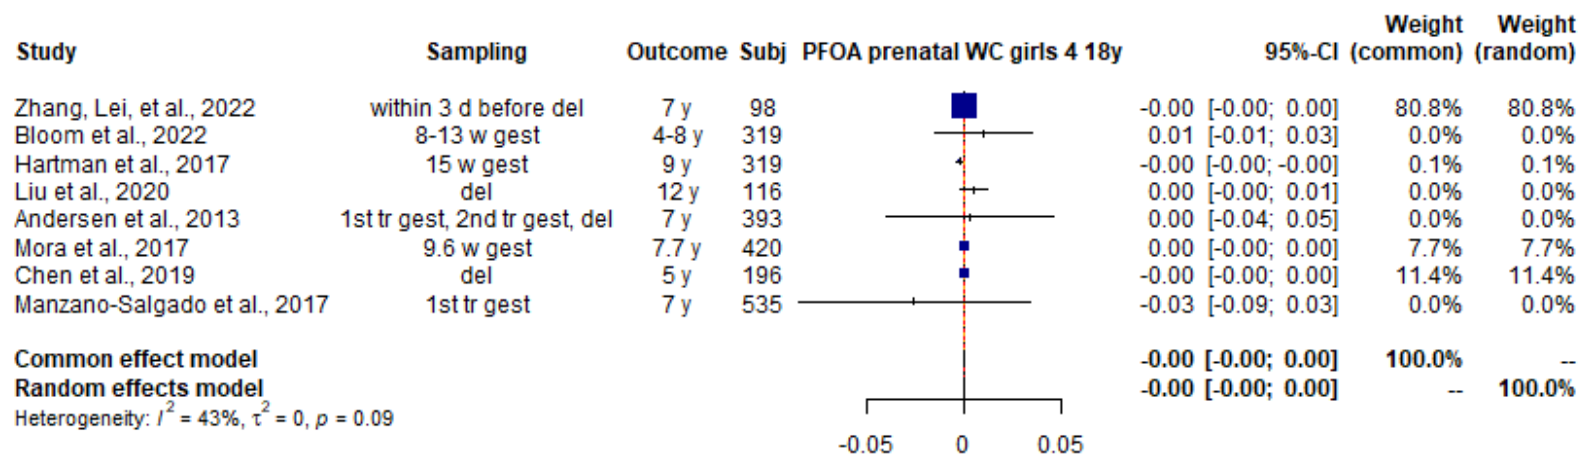

# Prenatal and childhood exposure to per-/polyfluoroalkyl substances (PFASs) and its associations with childhood overweight and/or obesity: a systematic review with meta-analyses

Gianfranco Frigerio, Chiara Matilde Ferrari, and Silvia Fustinoni

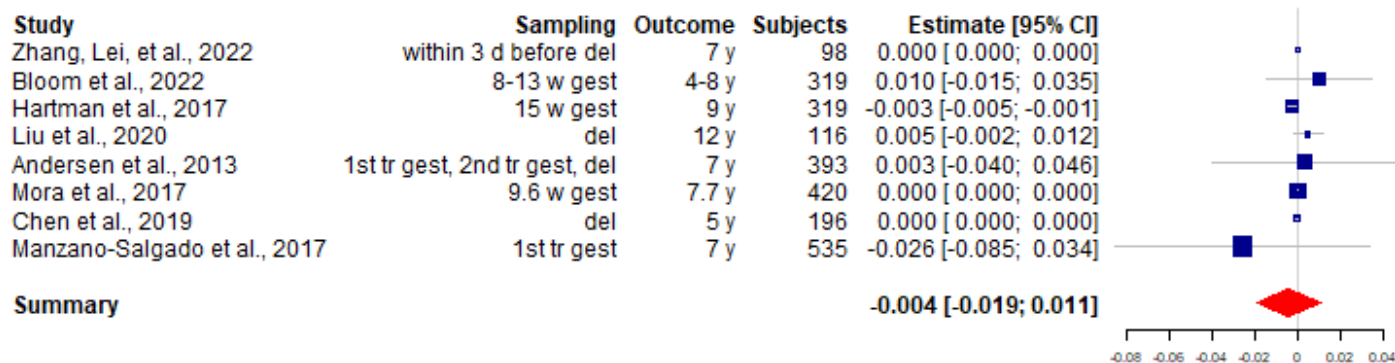

Prenatal and childhood exposure to per-/polyfluoroalkyl substances (PFASs) and its associations with childhood overweight and/or obesity: a systematic review with meta-analyses

Gianfranco Frigerio, Chiara Matilde Ferrari, and Silvia Fustinoni

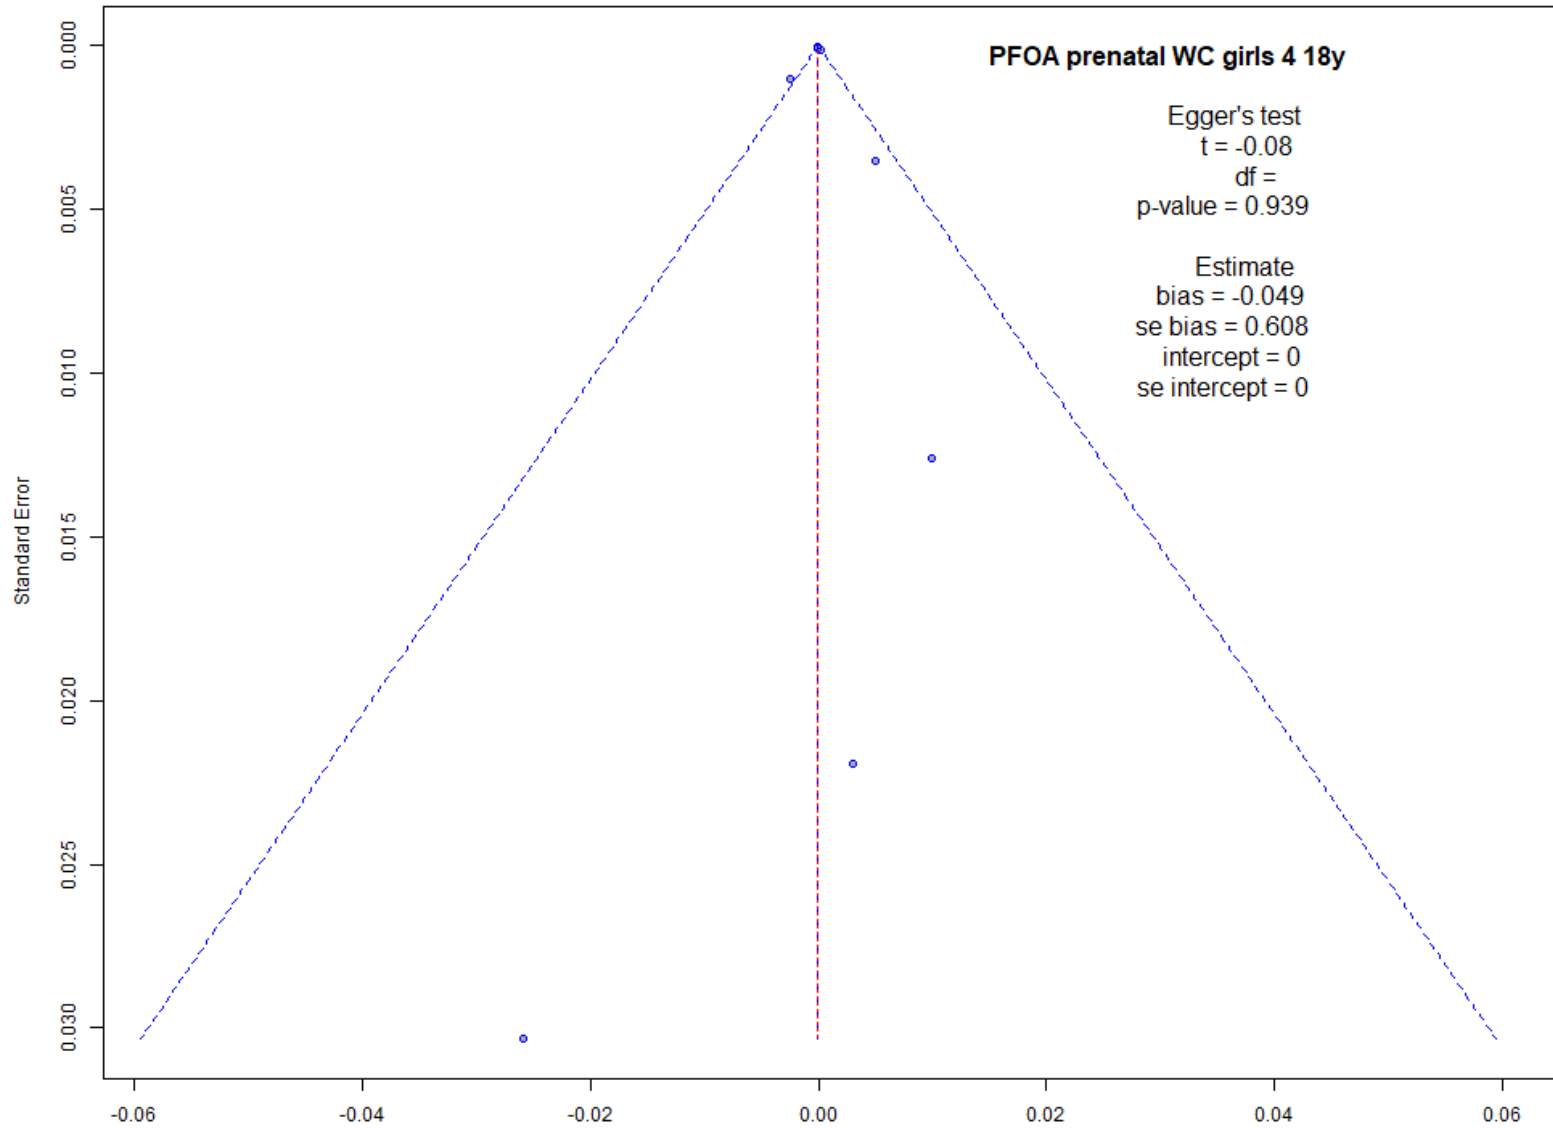

Prenatal and childhood exposure to per-/polyfluoroalkyl substances (PFASs) and its associations with childhood overweight and/or obesity: a systematic review with meta-analyses

Gianfranco Frigerio, Chiara Matilde Ferrari, and Silvia Fustinoni

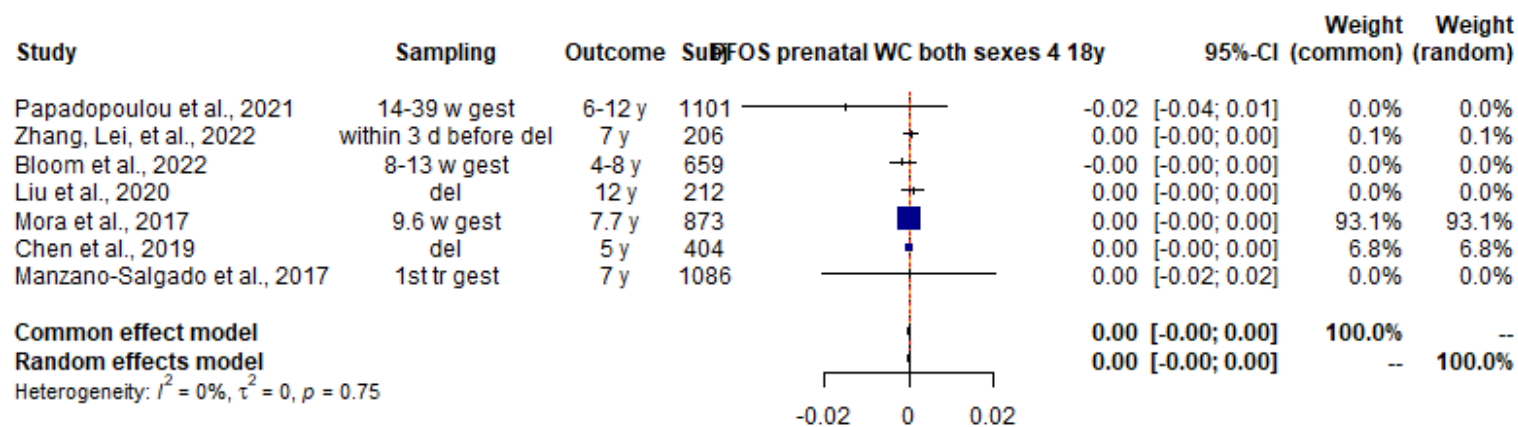

**Prenatal and childhood exposure to per-/polyfluoroalkyl substances (PFASs) and its associations with childhood overweight and/or obesity: a systematic review with meta-analyses**

Gianfranco Frigerio, Chiara Matilde Ferrari, and Silvia Fustinoni

| Study                        | Sampling              | Outcome | Subjects | Estimate [95% CI]             |
|------------------------------|-----------------------|---------|----------|-------------------------------|
| Papadopoulou et al., 2021    | 14-39 w gest          | 6-12 y  | 1101     | -0.015 [-0.039; 0.009]        |
| Zhang, Lei, et al., 2022     | within 3 d before del | 7 y     | 206      | 0.001 [-0.001; 0.002]         |
| Bloom et al., 2022           | 8-13 w gest           | 4-8 y   | 659      | -0.001 [-0.004; 0.001]        |
| Liu et al., 2020             | del                   | 12 y    | 212      | 0.001 [-0.001; 0.004]         |
| Mora et al., 2017            | 9.6 w gest            | 7.7 y   | 873      | 0.000 [0.000; 0.000]          |
| Chen et al., 2019            | del                   | 5 y     | 404      | 0.000 [0.000; 0.000]          |
| Manzano-Salgado et al., 2017 | 1st tr gest           | 7 y     | 1086     | 0.000 [-0.021; 0.021]         |
| <b>Summary</b>               |                       |         |          | <b>-0.004 [-0.011; 0.004]</b> |

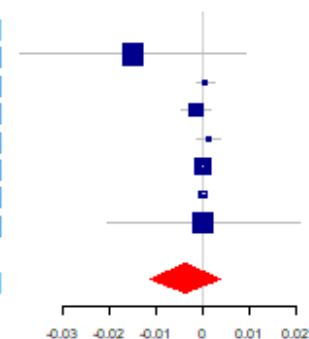



Prenatal and childhood exposure to per-/polyfluoroalkyl substances (PFASs) and its associations with childhood overweight and/or obesity: a systematic review with meta-analyses

Gianfranco Frigerio, Chiara Matilde Ferrari, and Silvia Fustinoni

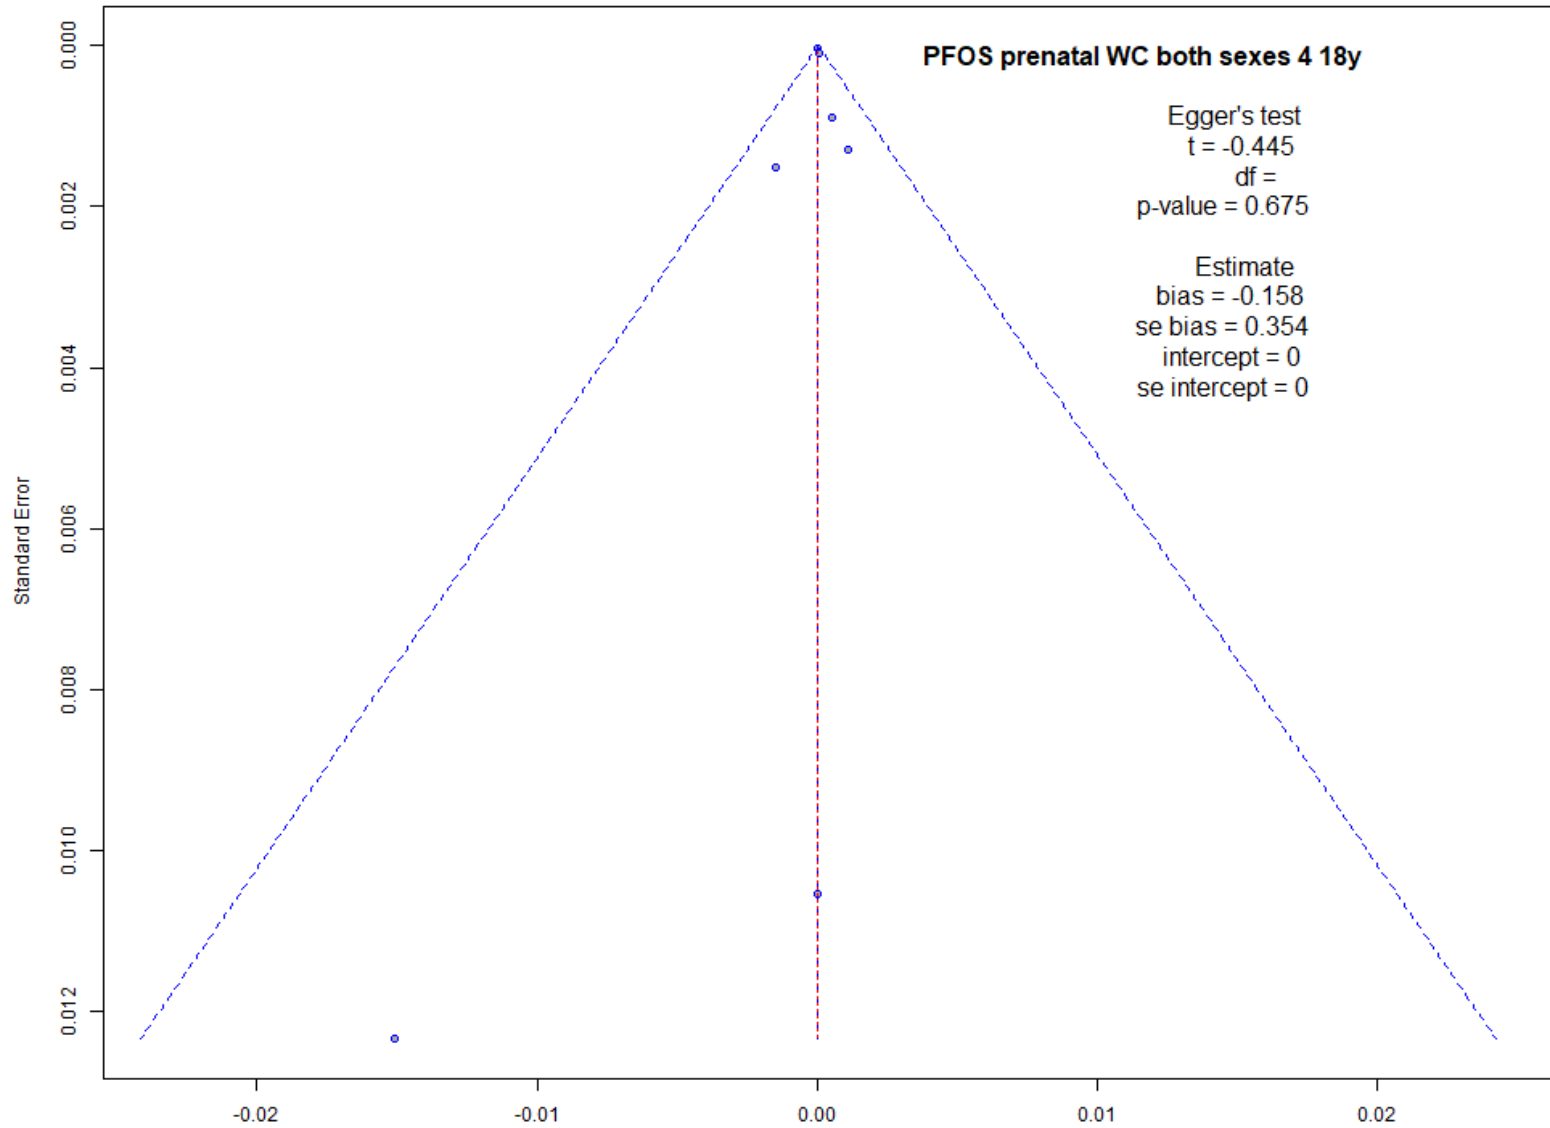

Prenatal and childhood exposure to per-/polyfluoroalkyl substances (PFASs) and its associations with childhood overweight and/or obesity: a systematic review with meta-analyses

Gianfranco Frigerio, Chiara Matilde Ferrari, and Silvia Fustinoni

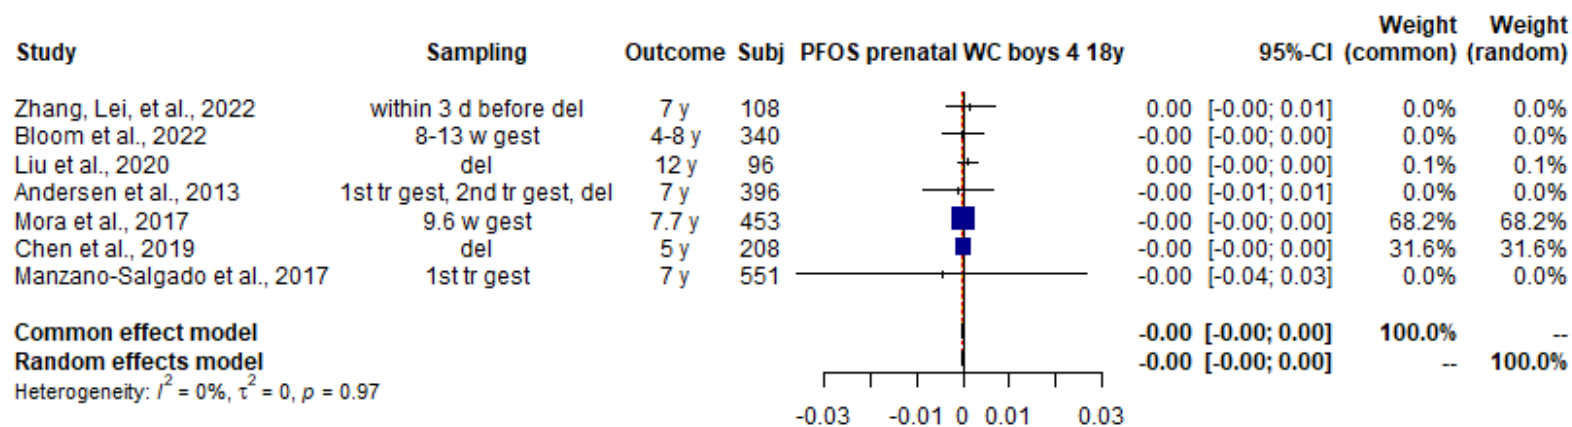

**Prenatal and childhood exposure to per-/polyfluoroalkyl substances (PFASs) and its associations with childhood overweight and/or obesity: a systematic review with meta-analyses**

Gianfranco Frigerio, Chiara Matilde Ferrari, and Silvia Fustinoni

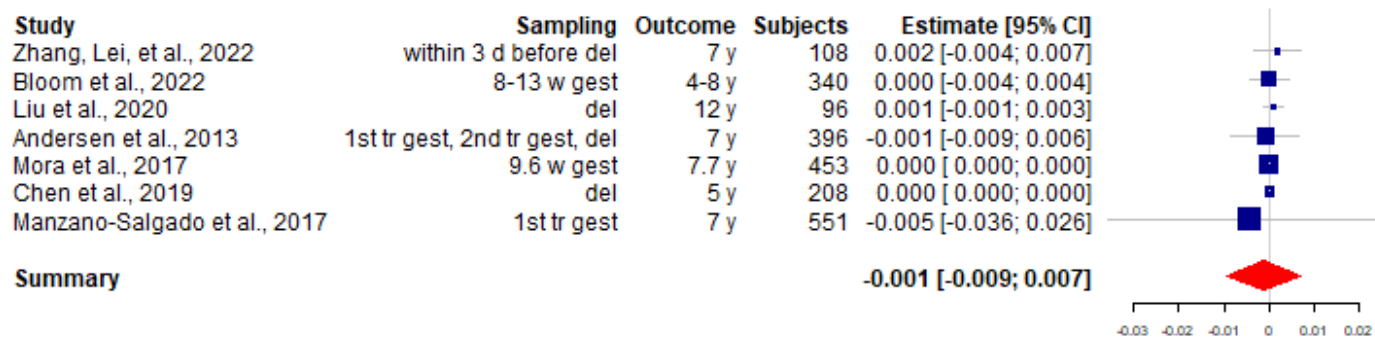

Prenatal and childhood exposure to per-/polyfluoroalkyl substances (PFASs) and its associations with childhood overweight and/or obesity: a systematic review with meta-analyses

Gianfranco Frigerio, Chiara Matilde Ferrari, and Silvia Fustinoni

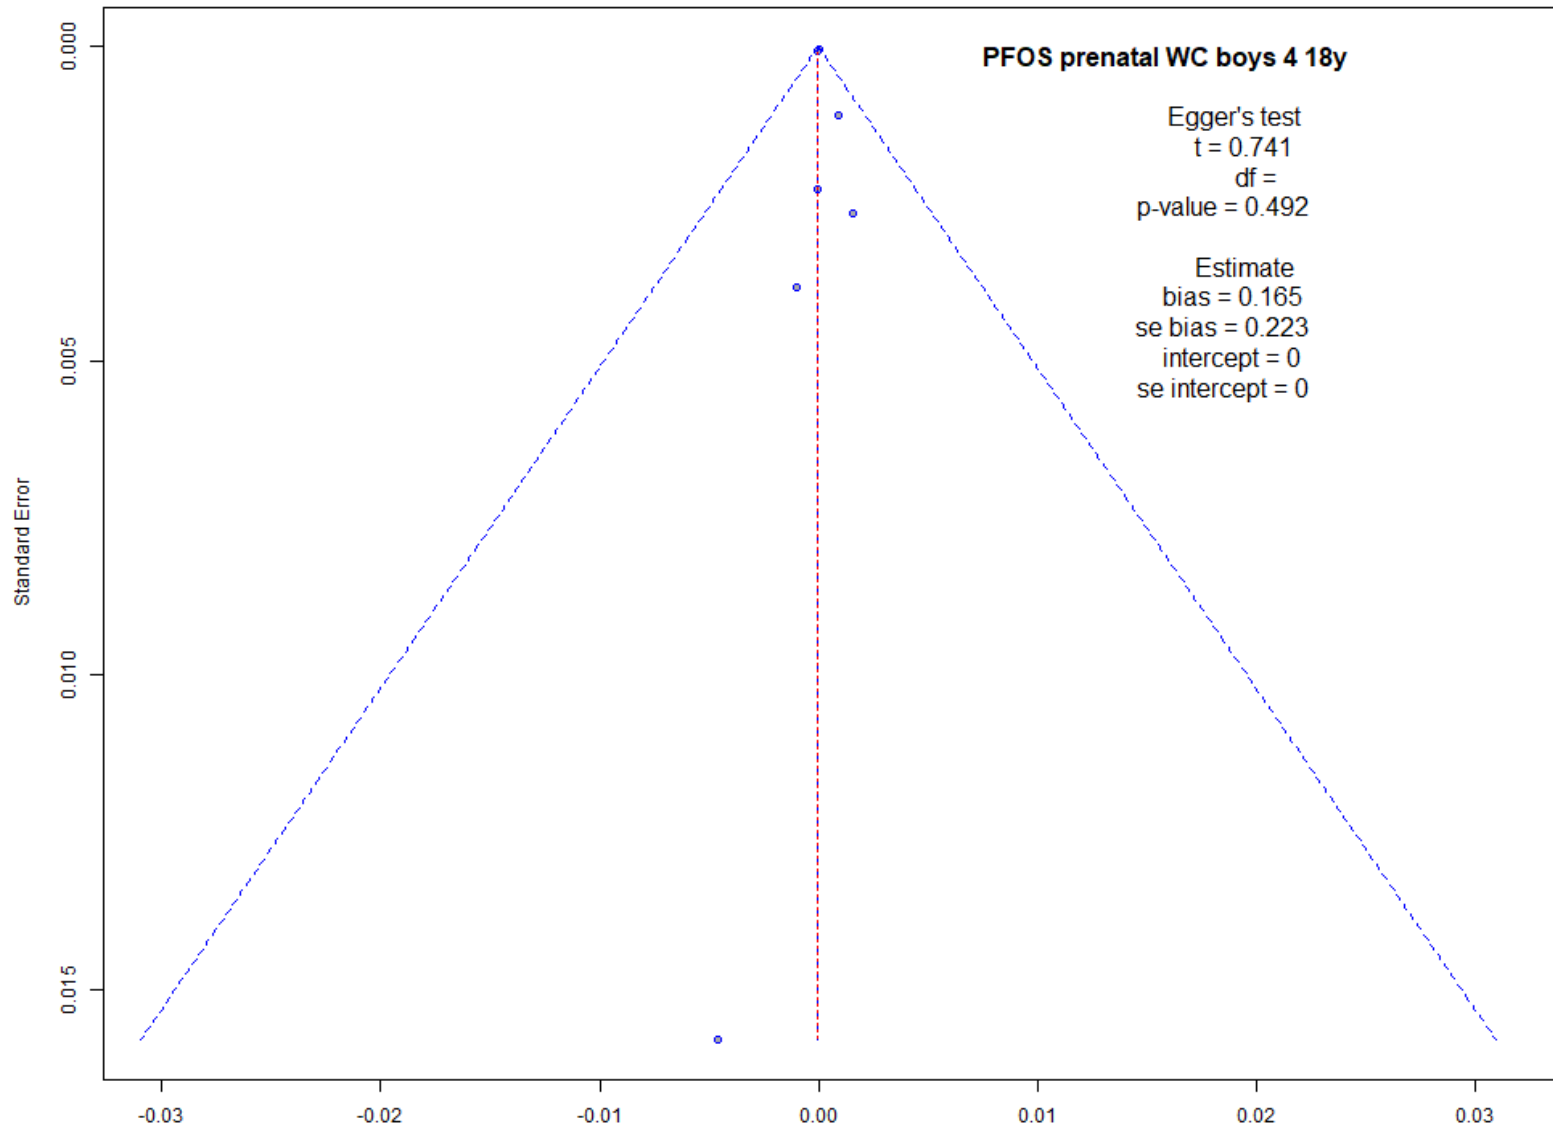

# Prenatal and childhood exposure to per-/polyfluoroalkyl substances (PFASs) and its associations with childhood overweight and/or obesity: a systematic review with meta-analyses

Gianfranco Frigerio, Chiara Matilde Ferrari, and Silvia Fustinoni

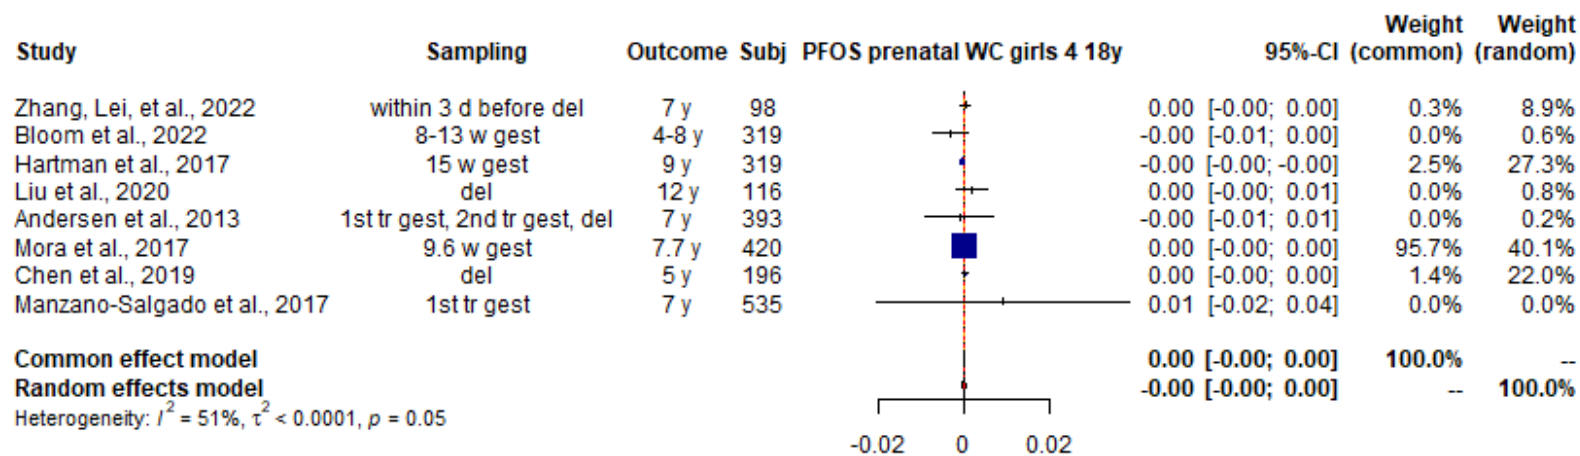

# Prenatal and childhood exposure to per-/polyfluoroalkyl substances (PFASs) and its associations with childhood overweight and/or obesity: a systematic review with meta-analyses

Gianfranco Frigerio, Chiara Matilde Ferrari, and Silvia Fustinoni

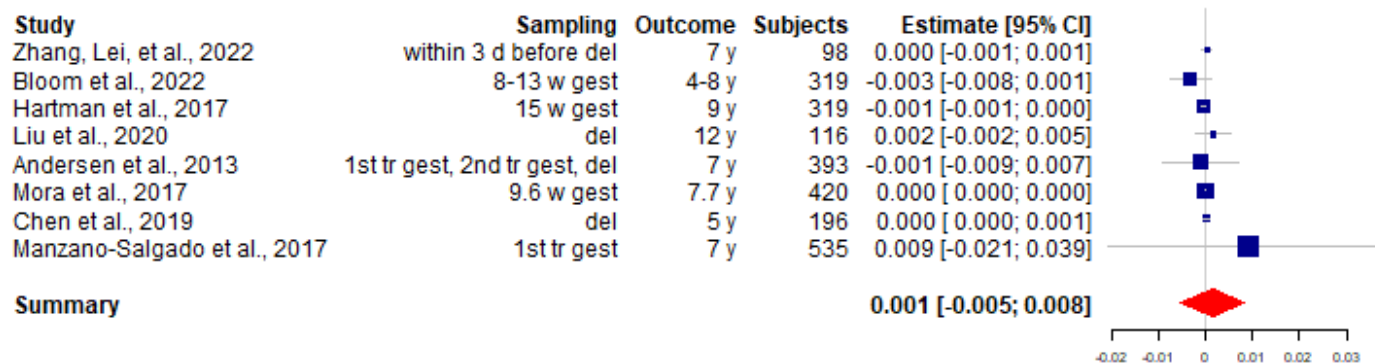

Prenatal and childhood exposure to per-/polyfluoroalkyl substances (PFASs) and its associations with childhood overweight and/or obesity: a systematic review with meta-analyses

Gianfranco Frigerio, Chiara Matilde Ferrari, and Silvia Fustinoni

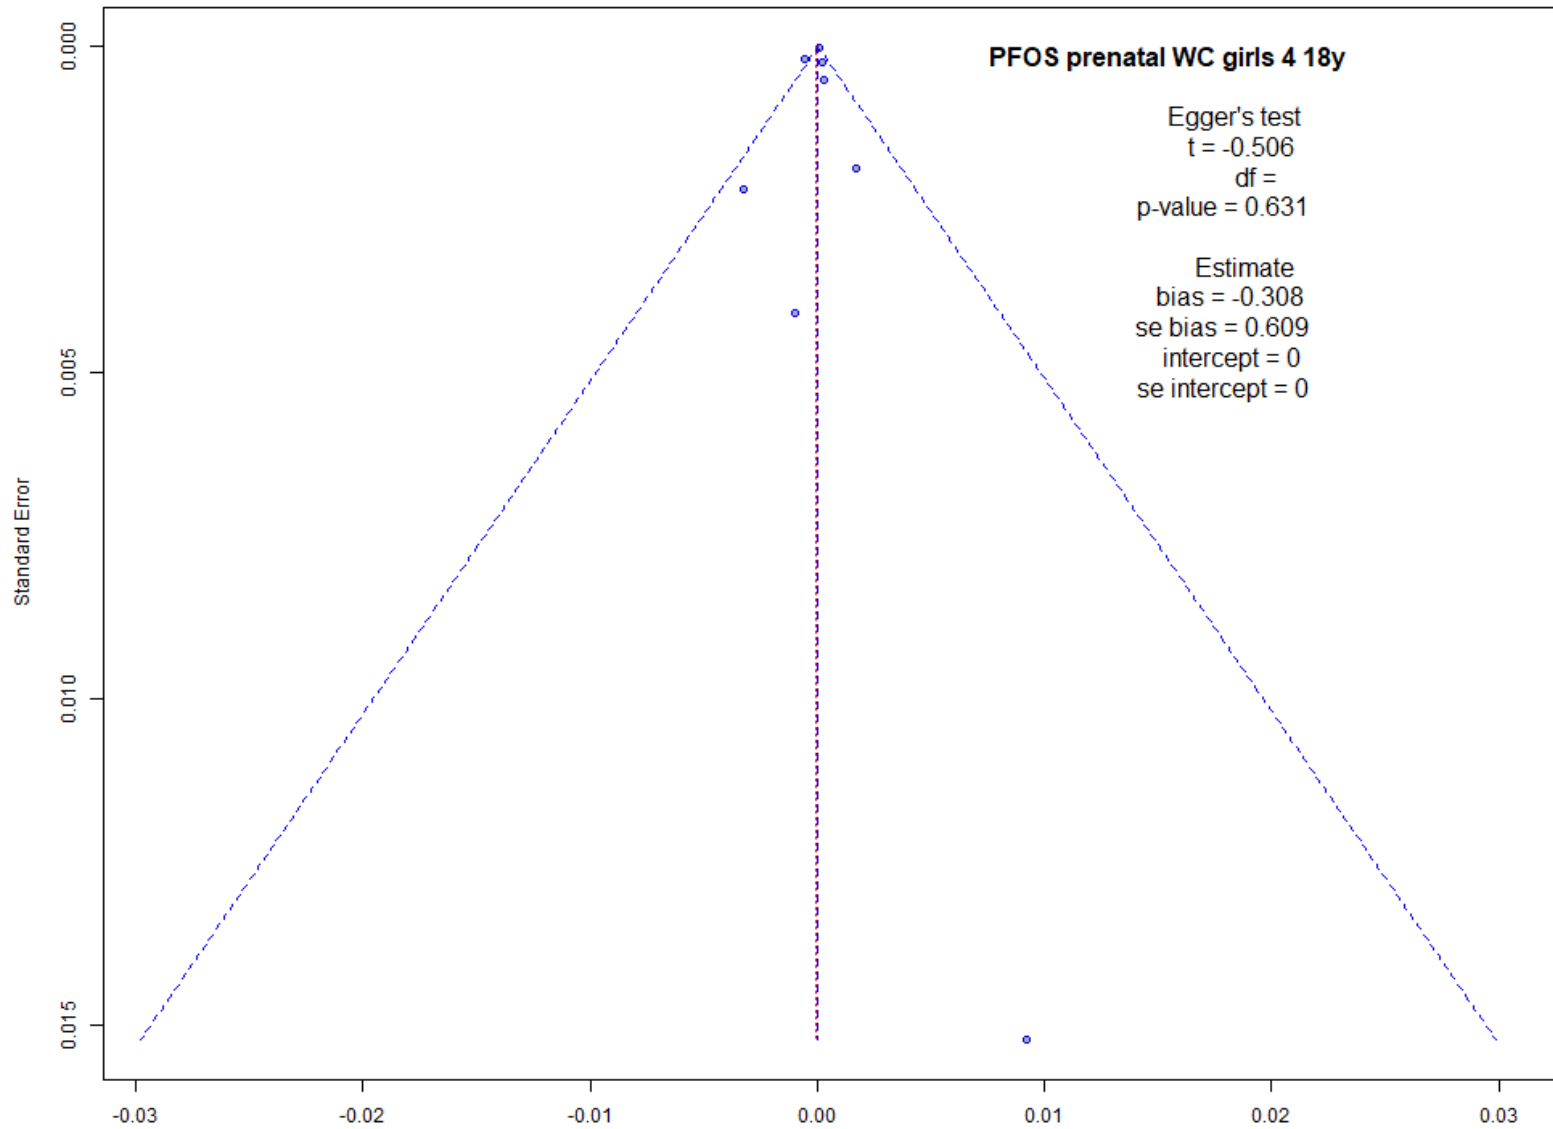

Prenatal and childhood exposure to per-/polyfluoroalkyl substances (PFASs) and its associations with childhood overweight and/or obesity: a systematic review with meta-analyses

Gianfranco Frigerio, Chiara Matilde Ferrari, and Silvia Fustinoni

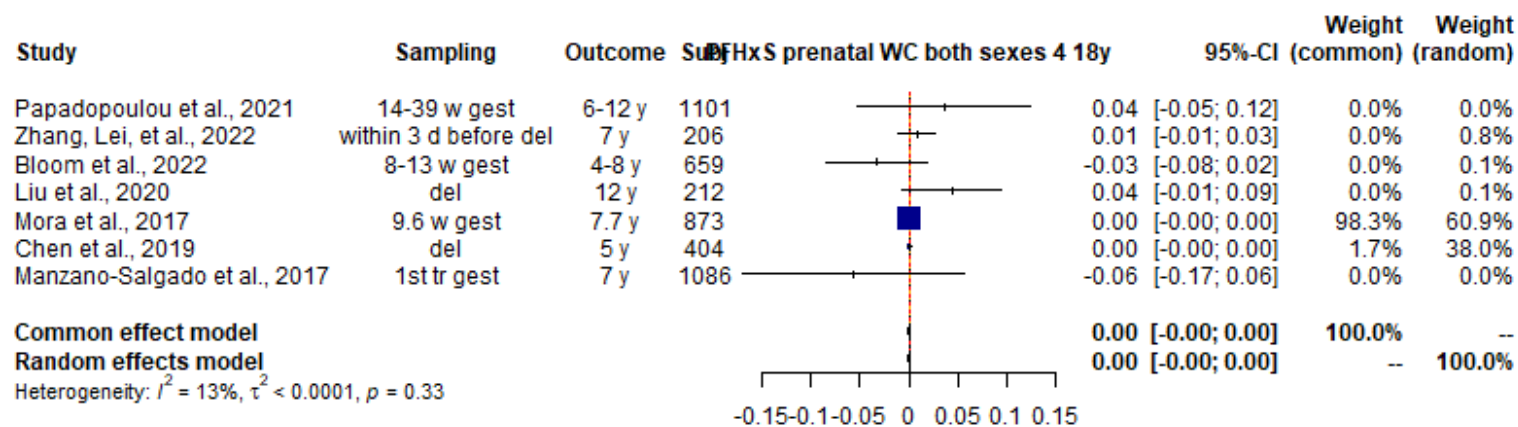



**Prenatal and childhood exposure to per-/polyfluoroalkyl substances (PFASs) and its associations with childhood overweight and/or obesity: a systematic review with meta-analyses**

Gianfranco Frigerio, Chiara Matilde Ferrari, and Silvia Fustinoni

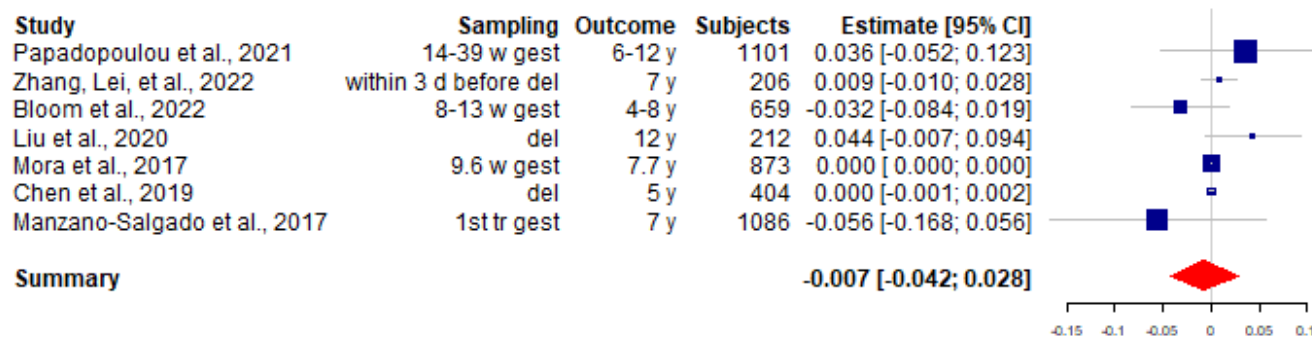

Prenatal and childhood exposure to per-/polyfluoroalkyl substances (PFASs) and its associations with childhood overweight and/or obesity: a systematic review with meta-analyses

Gianfranco Frigerio, Chiara Matilde Ferrari, and Silvia Fustinoni

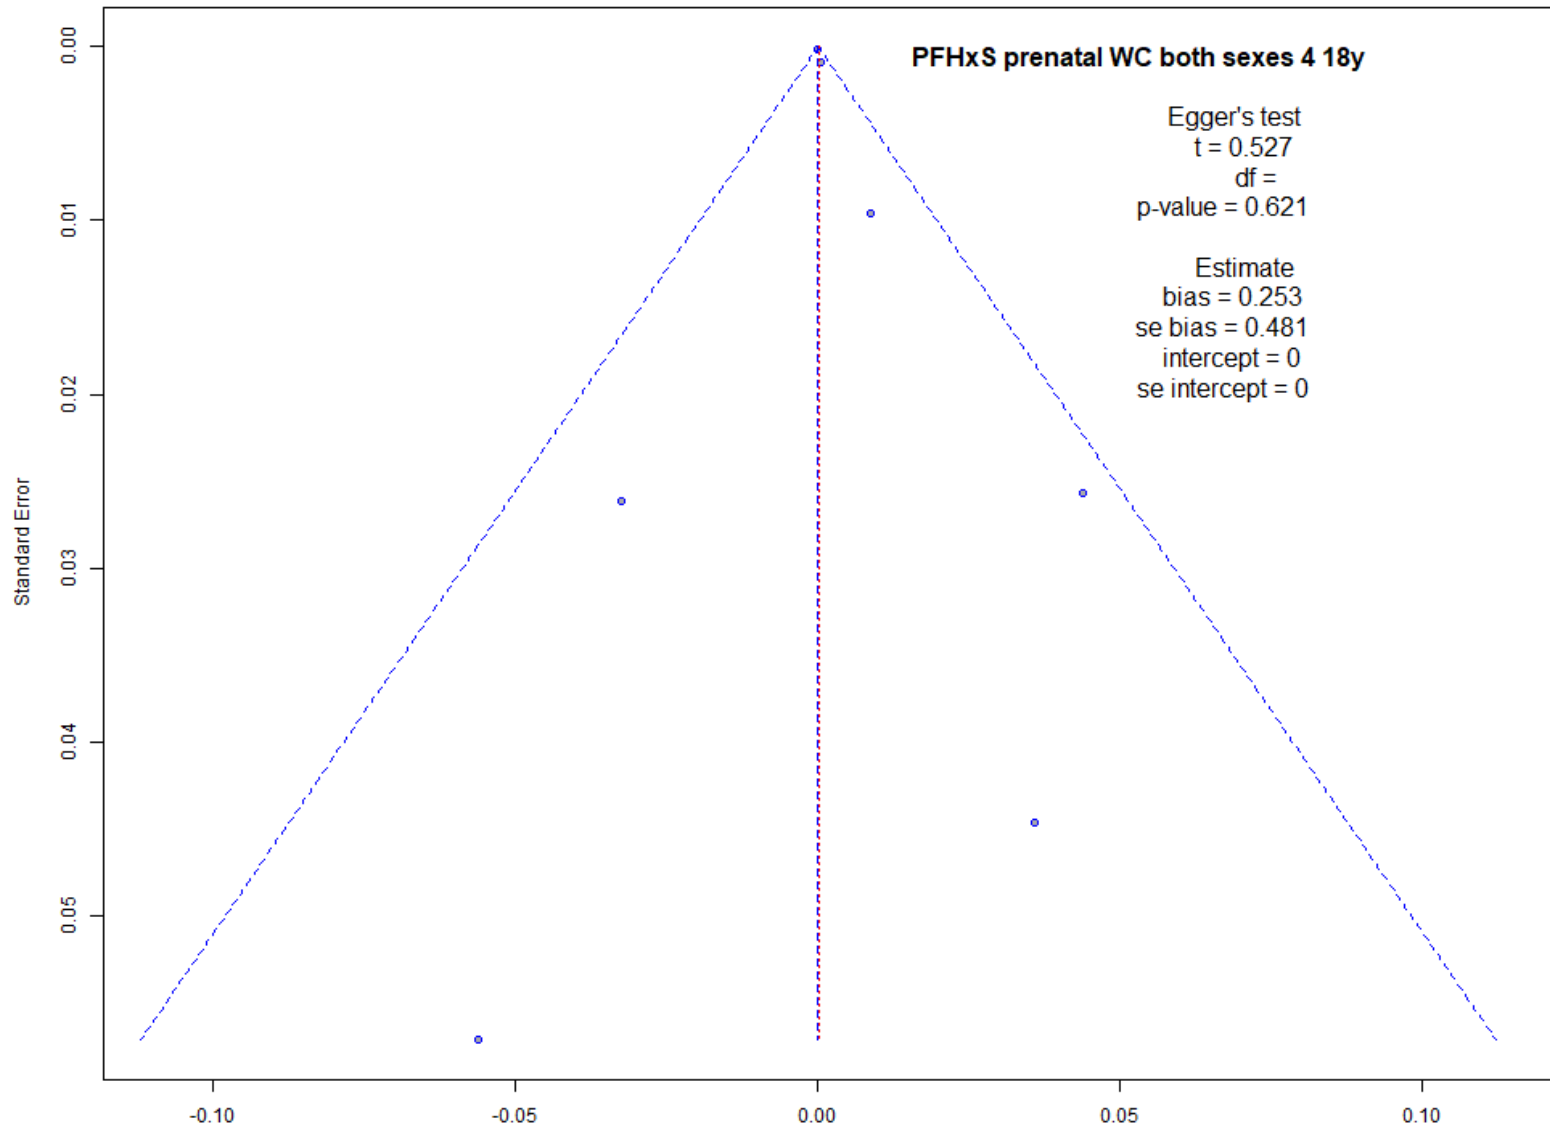

# Prenatal and childhood exposure to per-/polyfluoroalkyl substances (PFASs) and its associations with childhood overweight and/or obesity: a systematic review with meta-analyses

Gianfranco Frigerio, Chiara Matilde Ferrari, and Silvia Fustinoni

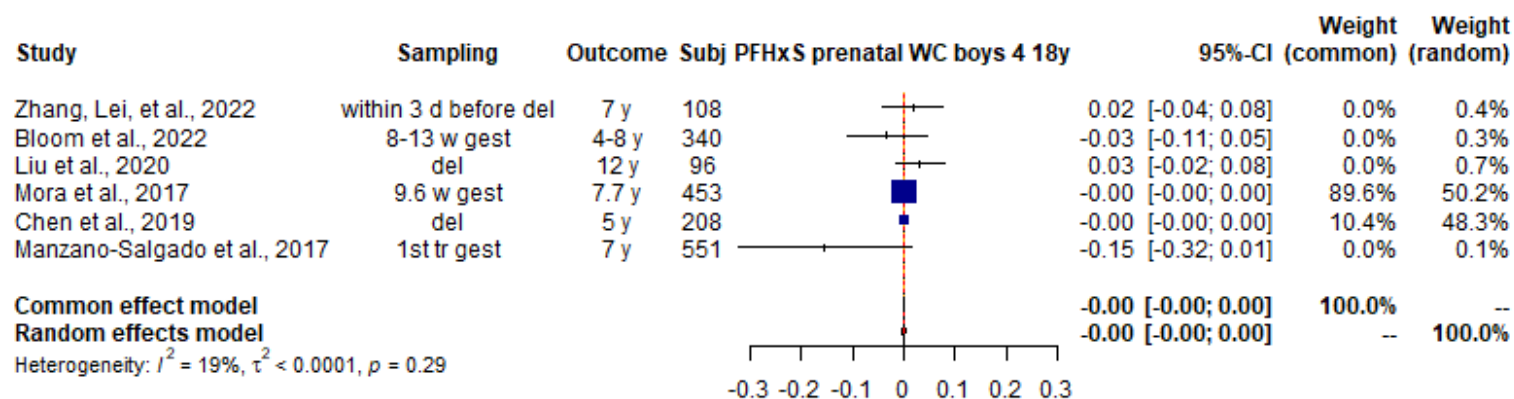

# Prenatal and childhood exposure to per-/polyfluoroalkyl substances (PFASs) and its associations with childhood overweight and/or obesity: a systematic review with meta-analyses

Gianfranco Frigerio, Chiara Matilde Ferrari, and Silvia Fustinoni

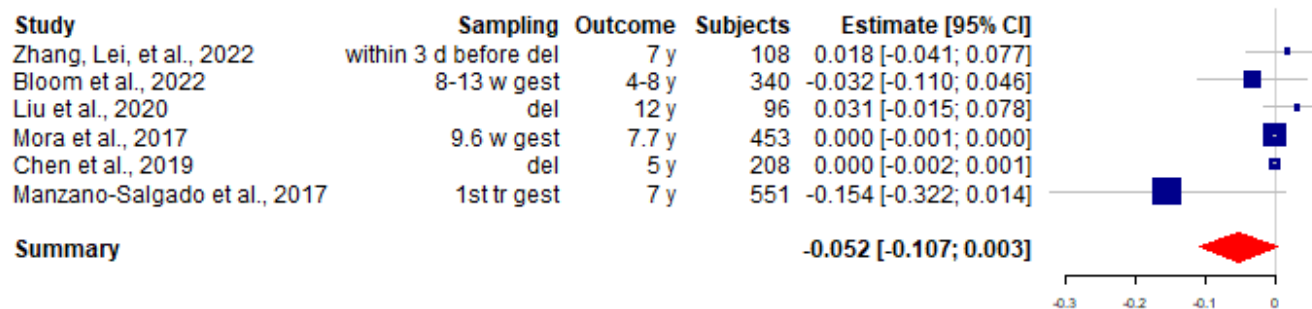

Prenatal and childhood exposure to per-/polyfluoroalkyl substances (PFASs) and its associations with childhood overweight and/or obesity: a systematic review with meta-analyses

Gianfranco Frigerio, Chiara Matilde Ferrari, and Silvia Fustinoni

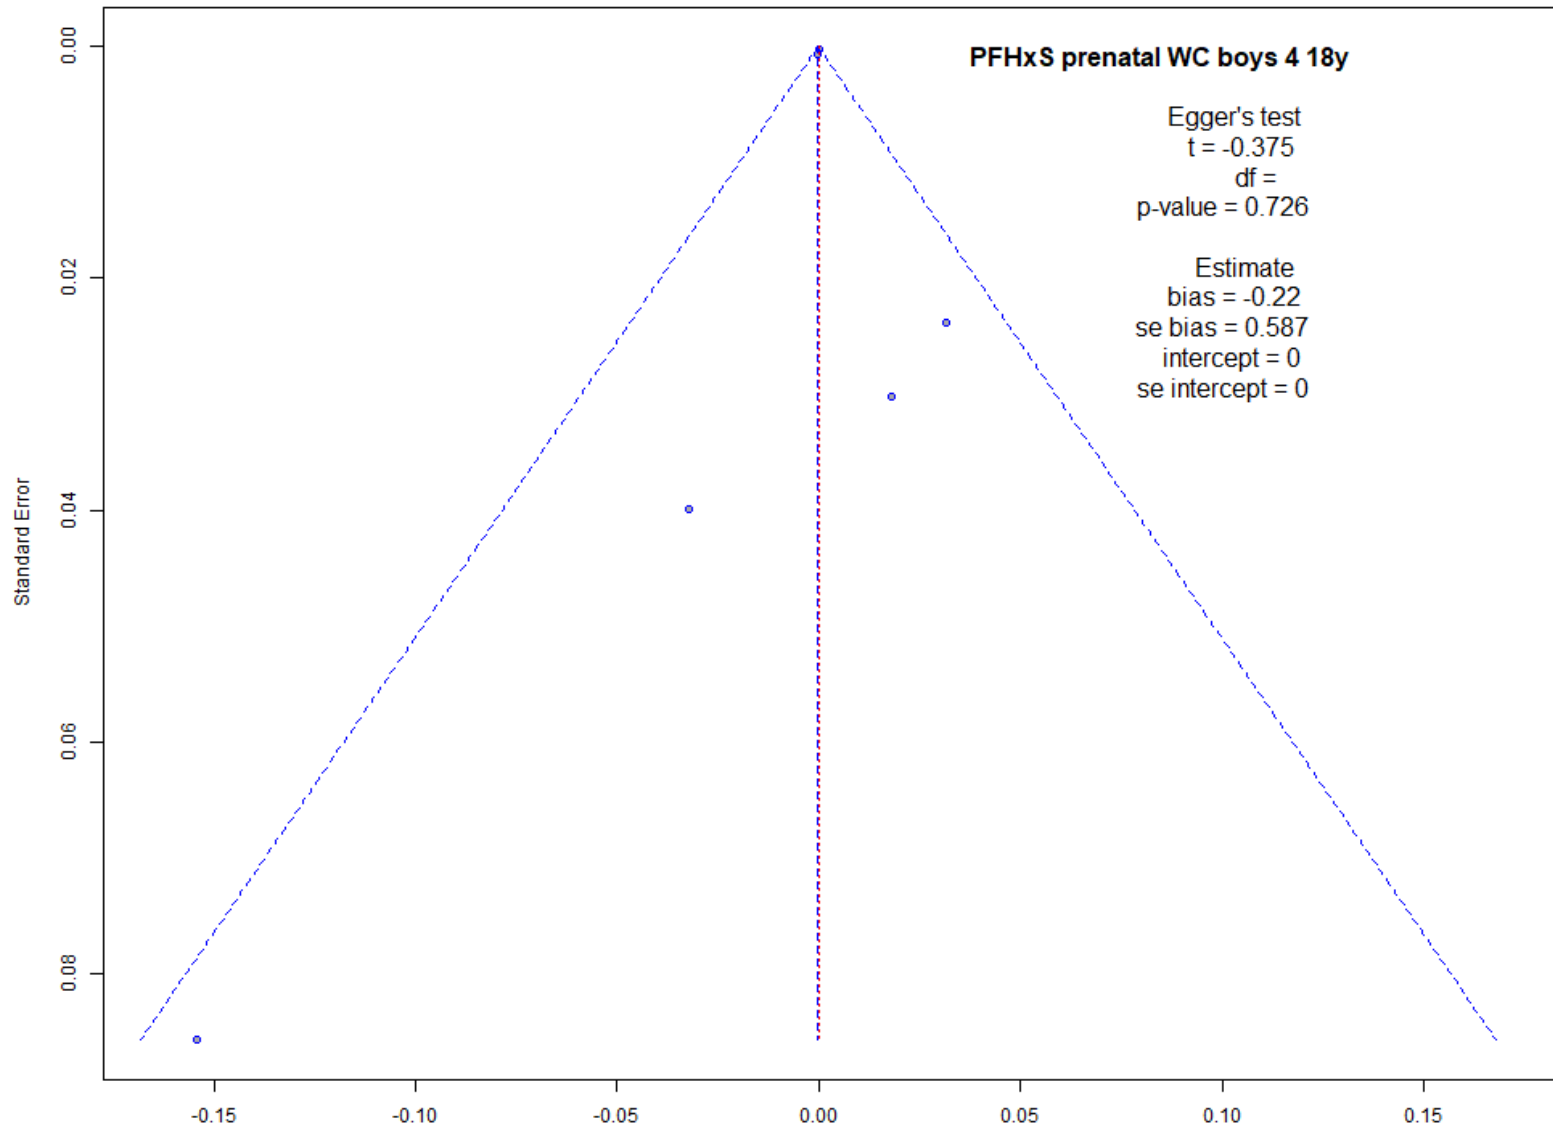

Prenatal and childhood exposure to per-/polyfluoroalkyl substances (PFASs) and its associations with childhood overweight and/or obesity: a systematic review with meta-analyses

Gianfranco Frigerio, Chiara Matilde Ferrari, and Silvia Fustinoni

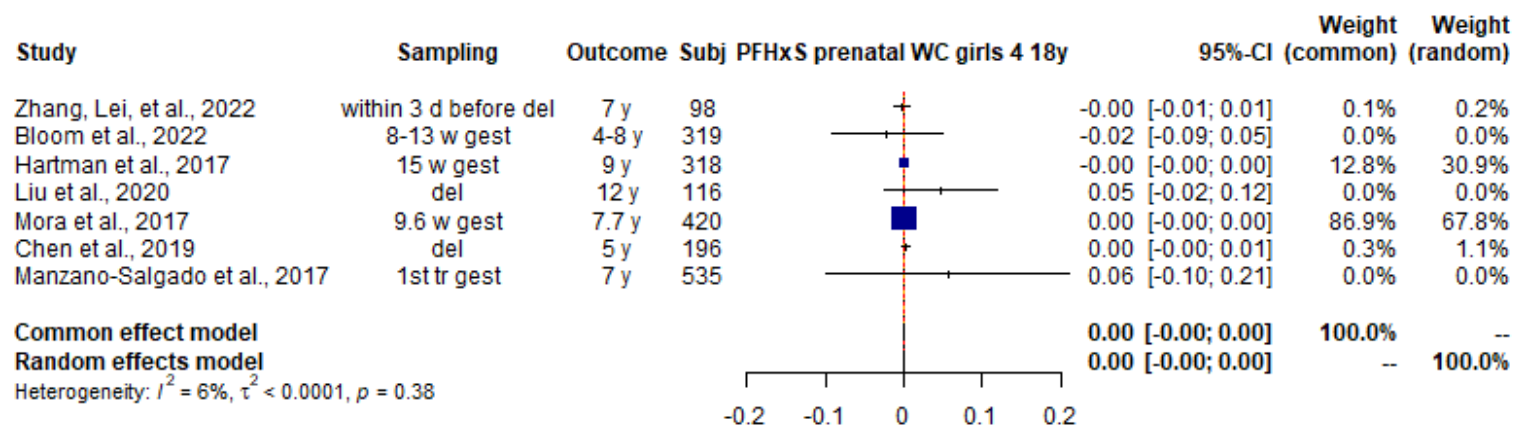

**Prenatal and childhood exposure to per-/polyfluoroalkyl substances (PFASs) and its associations with childhood overweight and/or obesity: a systematic review with meta-analyses**

Gianfranco Frigerio, Chiara Matilde Ferrari, and Silvia Fustinoni

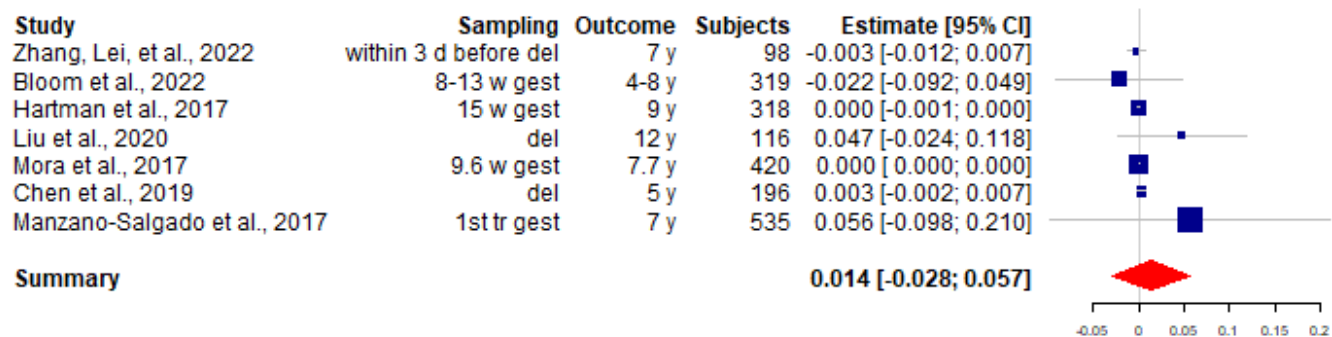

Prenatal and childhood exposure to per-/polyfluoroalkyl substances (PFASs) and its associations with childhood overweight and/or obesity: a systematic review with meta-analyses

Gianfranco Frigerio, Chiara Matilde Ferrari, and Silvia Fustinoni

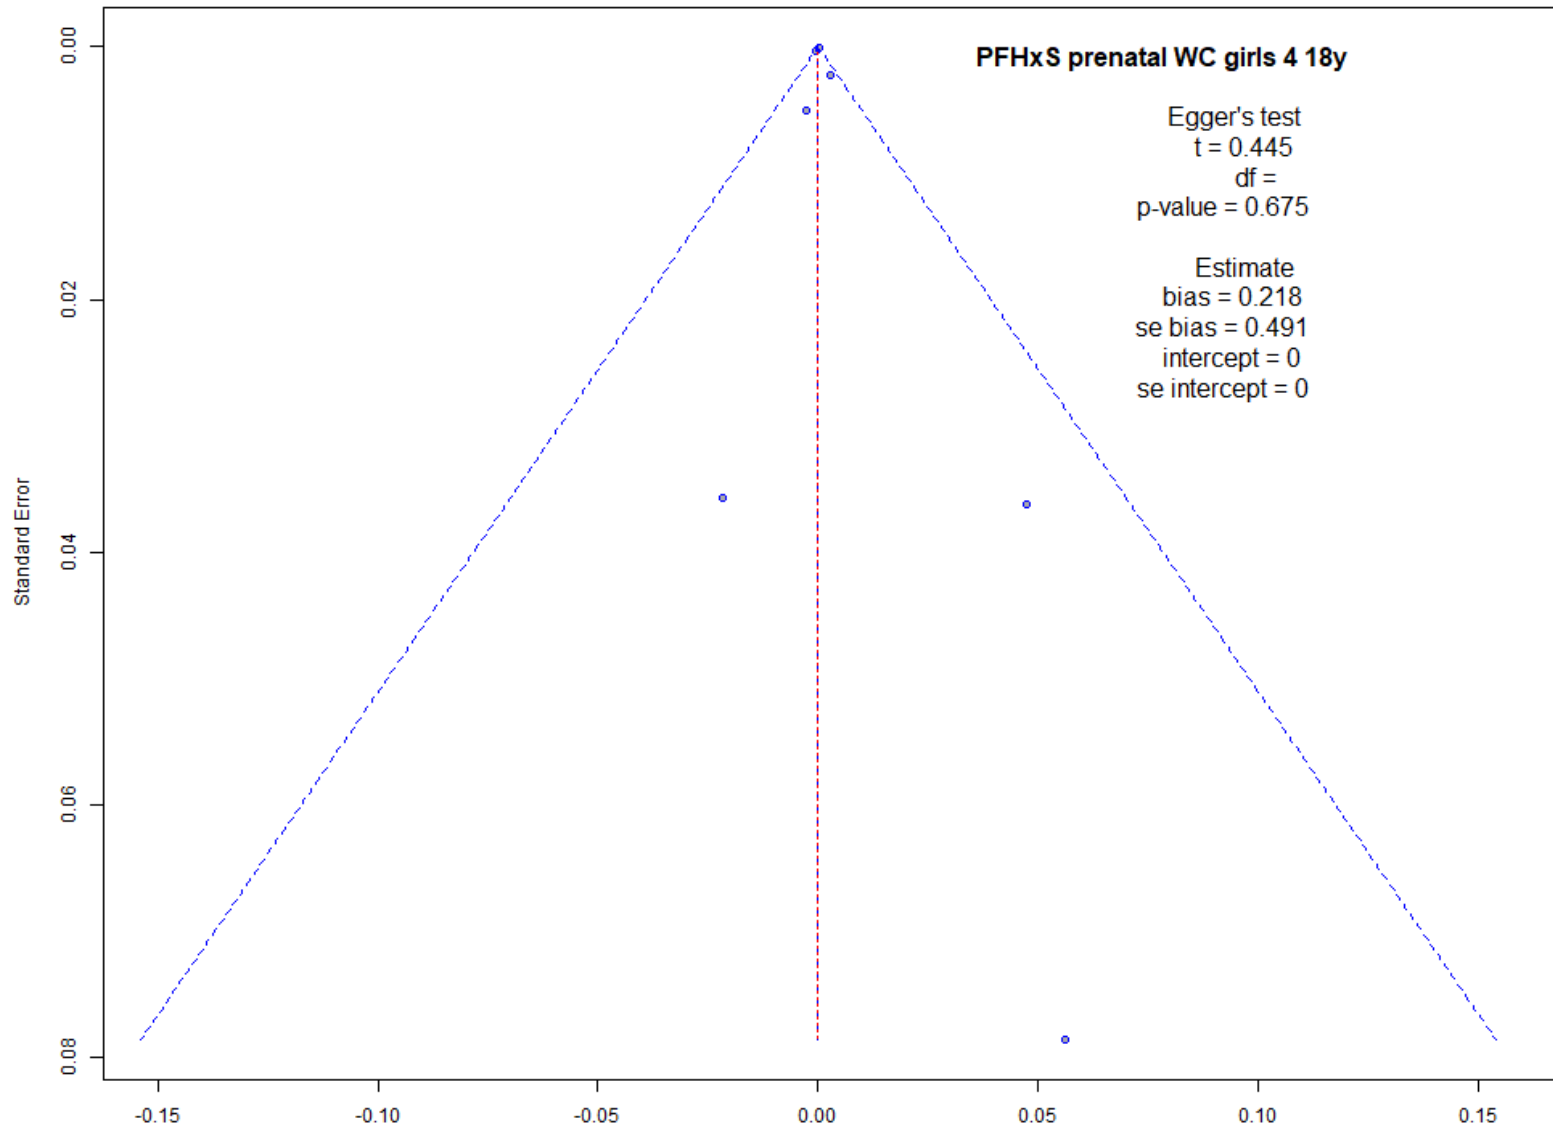



Prenatal and childhood exposure to per-/polyfluoroalkyl substances (PFASs) and its associations with childhood overweight and/or obesity: a systematic review with meta-analyses

Gianfranco Frigerio, Chiara Matilde Ferrari, and Silvia Fustinoni

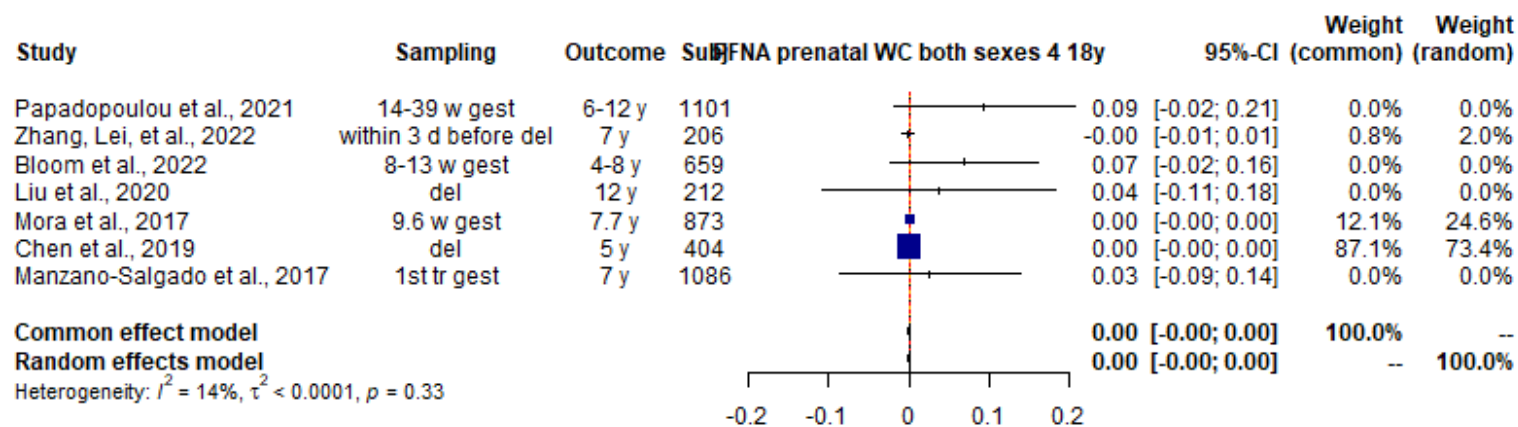

**Prenatal and childhood exposure to per-/polyfluoroalkyl substances (PFASs) and its associations with childhood overweight and/or obesity: a systematic review with meta-analyses**

Gianfranco Frigerio, Chiara Matilde Ferrari, and Silvia Fustinoni

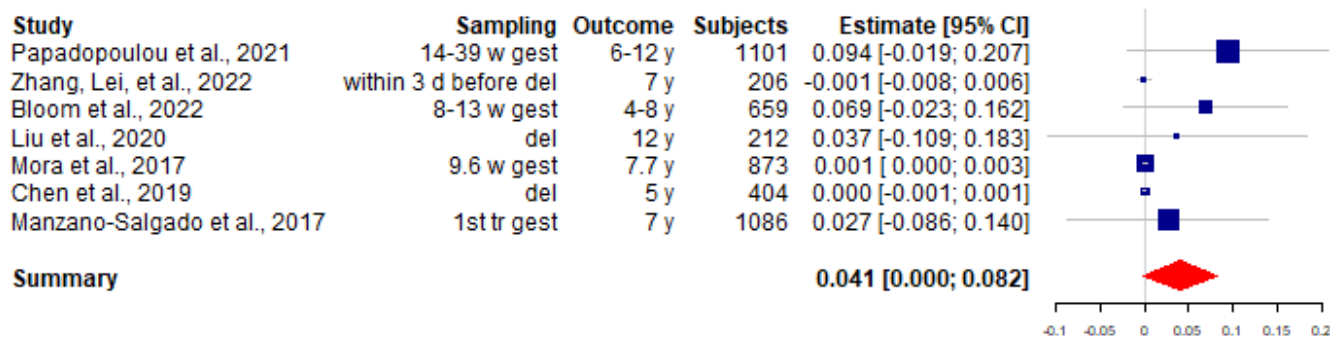



# Prenatal and childhood exposure to per-/polyfluoroalkyl substances (PFASs) and its associations with childhood overweight and/or obesity: a systematic review with meta-analyses

Gianfranco Frigerio, Chiara Matilde Ferrari, and Silvia Fustinoni

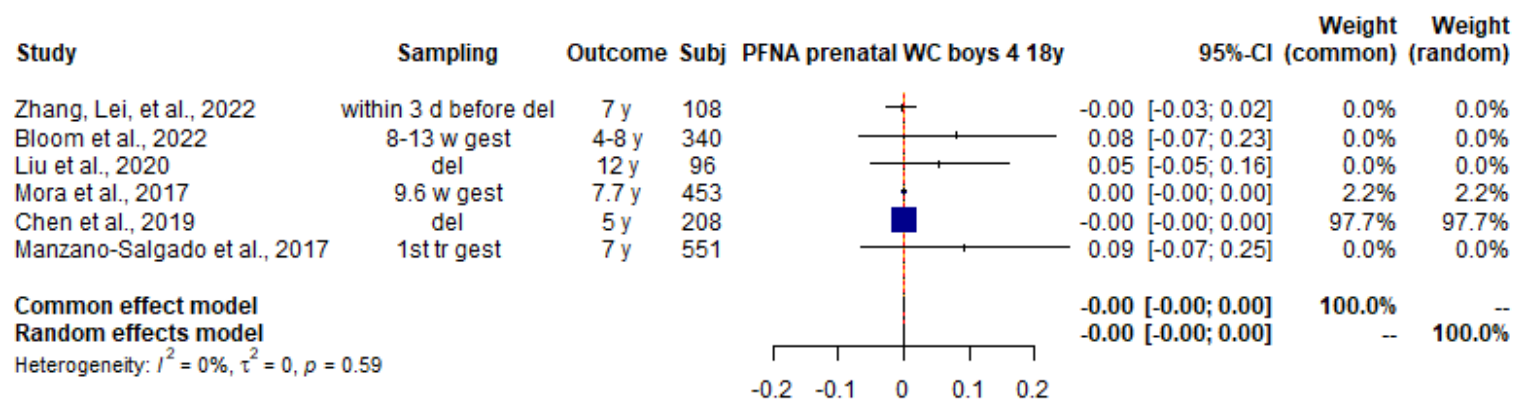

**Prenatal and childhood exposure to per-/polyfluoroalkyl substances (PFASs) and its associations with childhood overweight and/or obesity: a systematic review with meta-analyses**

Gianfranco Frigerio, Chiara Matilde Ferrari, and Silvia Fustinoni

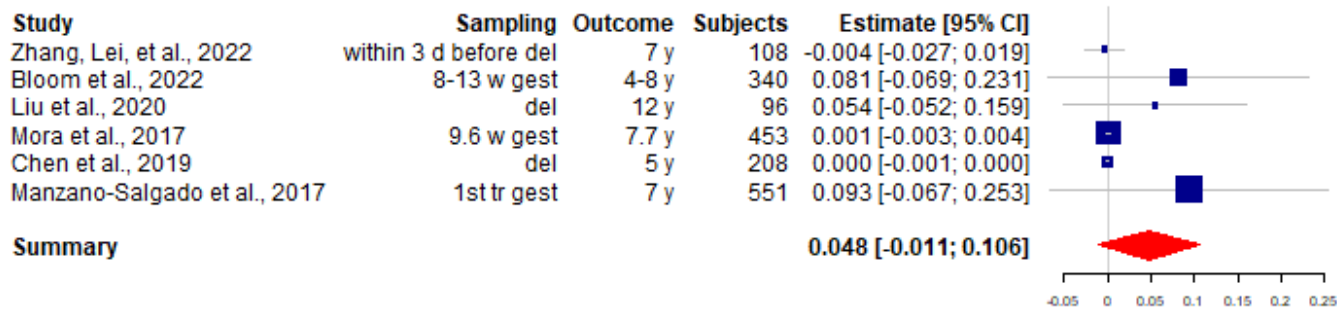

Prenatal and childhood exposure to per-/polyfluoroalkyl substances (PFASs) and its associations with childhood overweight and/or obesity: a systematic review with meta-analyses

Gianfranco Frigerio, Chiara Matilde Ferrari, and Silvia Fustinoni

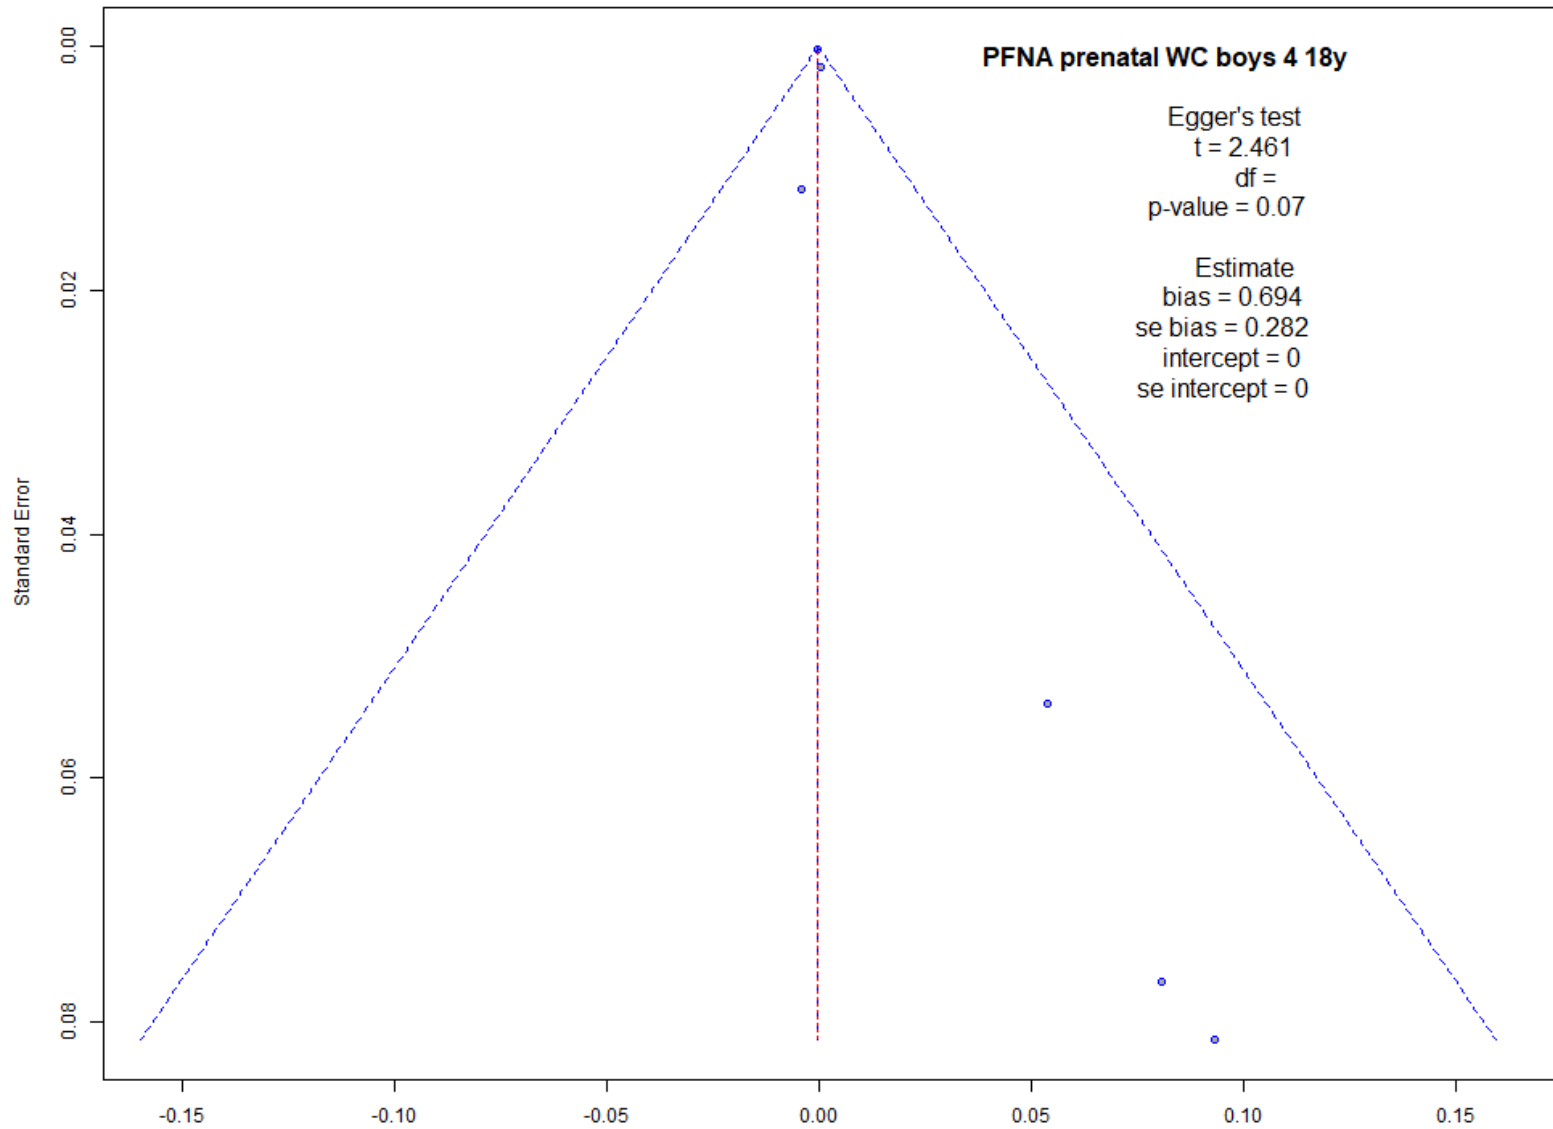

Prenatal and childhood exposure to per-/polyfluoroalkyl substances (PFASs) and its associations with childhood overweight and/or obesity: a systematic review with meta-analyses

Gianfranco Frigerio, Chiara Matilde Ferrari, and Silvia Fustinoni

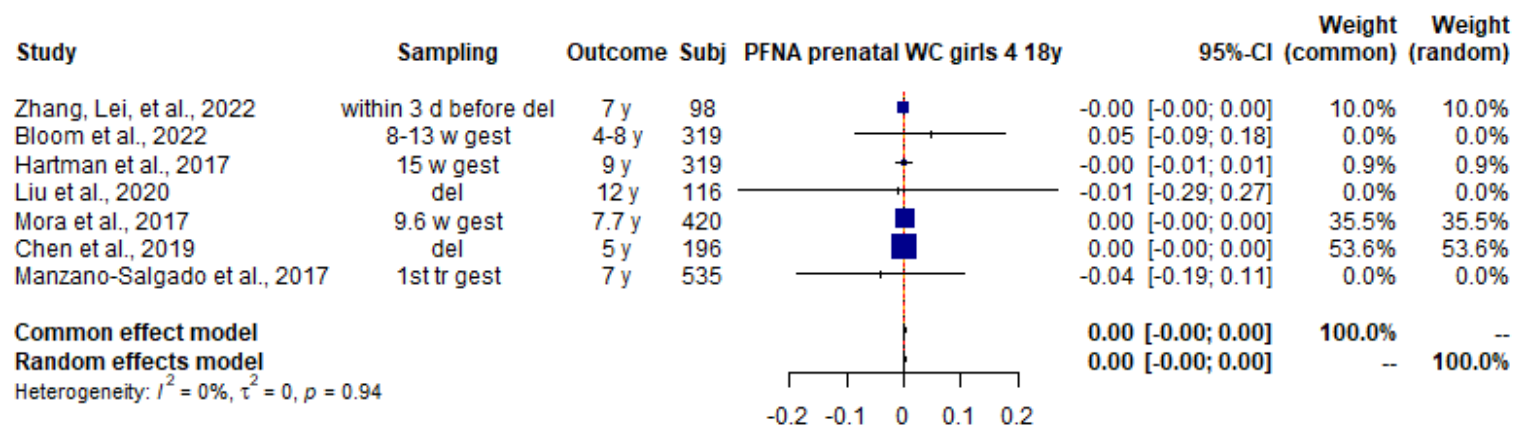

**Prenatal and childhood exposure to per-/polyfluoroalkyl substances (PFASs) and its associations with childhood overweight and/or obesity: a systematic review with meta-analyses**

Gianfranco Frigerio, Chiara Matilde Ferrari, and Silvia Fustinoni

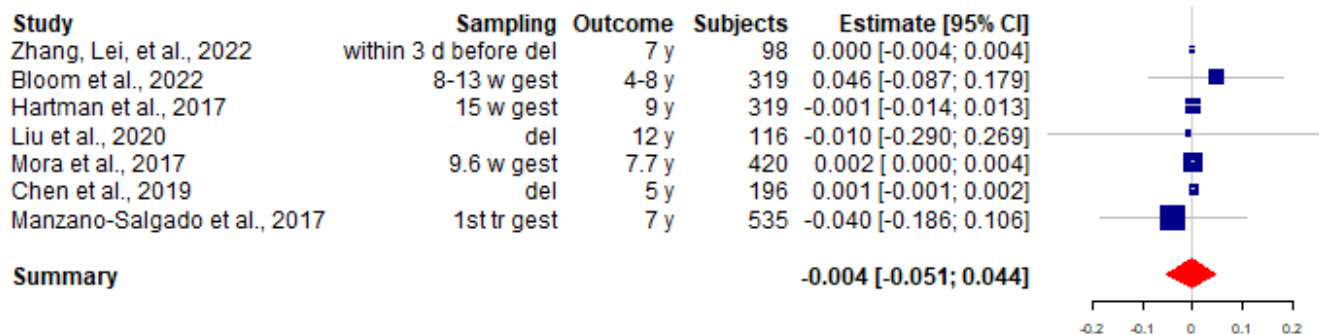



Prenatal and childhood exposure to per-/polyfluoroalkyl substances (PFASs) and its associations with childhood overweight and/or obesity: a systematic review with meta-analyses

Gianfranco Frigerio, Chiara Matilde Ferrari, and Silvia Fustinoni

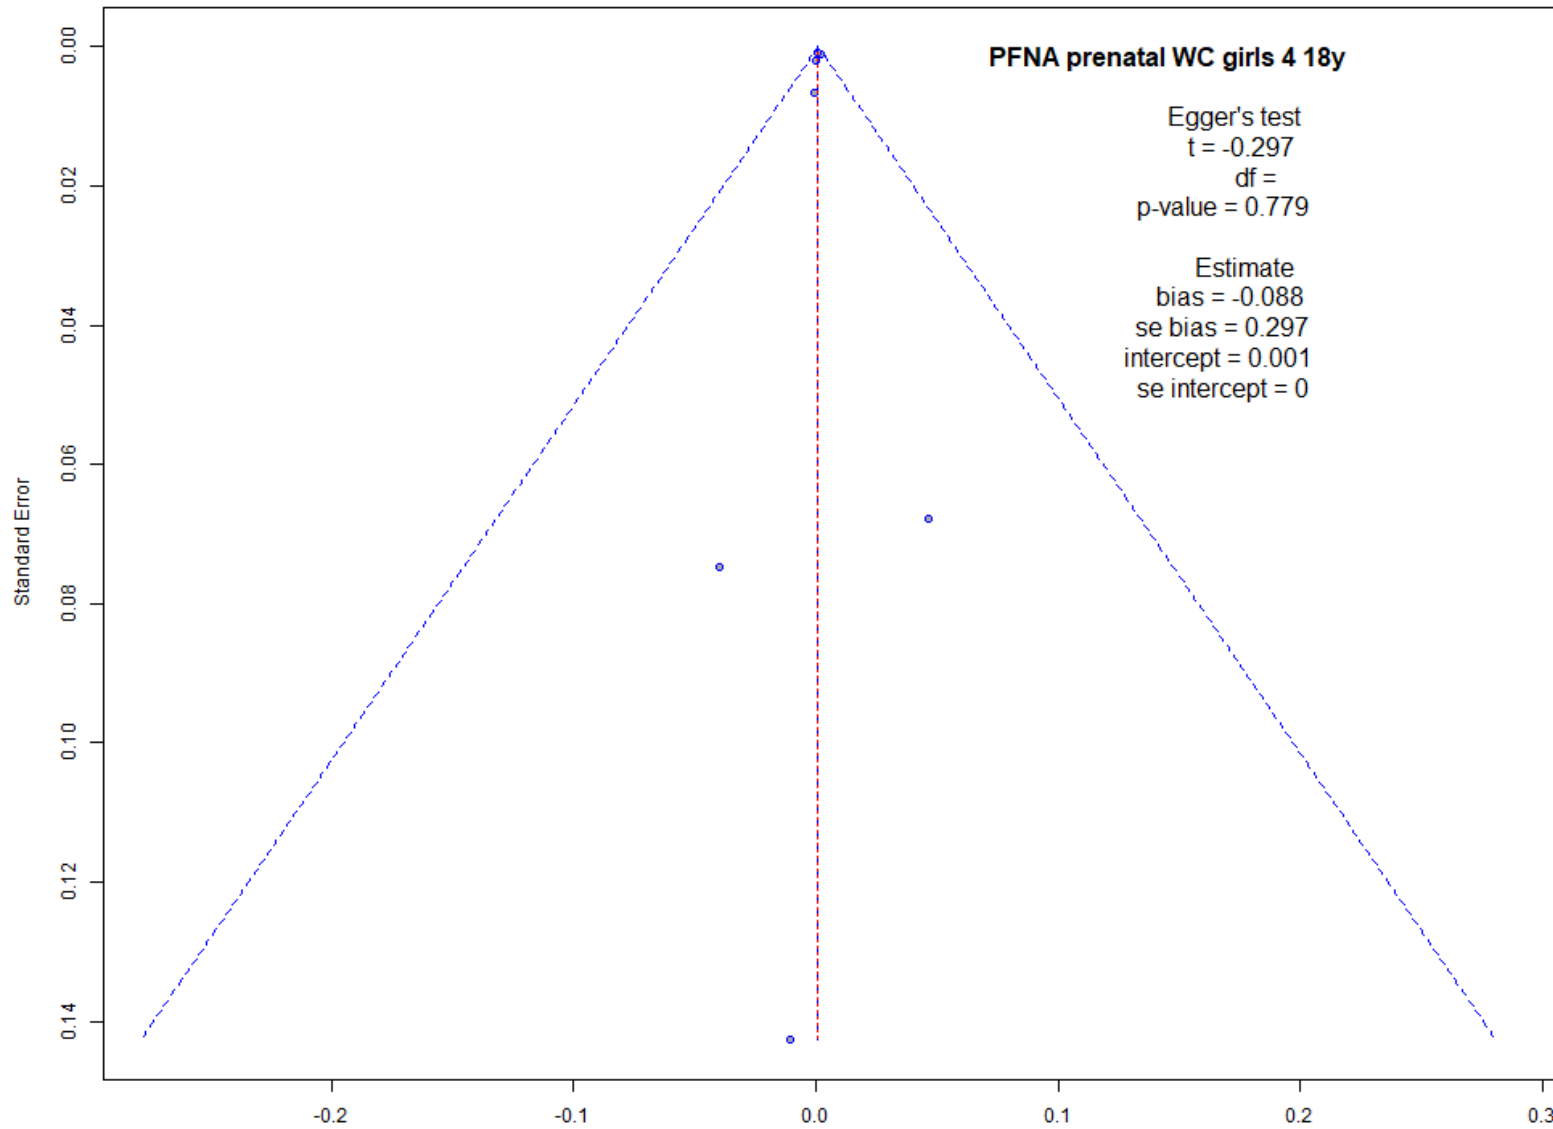

**Prenatal and childhood exposure to per-/polyfluoroalkyl substances (PFASs) and its associations with childhood overweight and/or obesity: a systematic review with meta-analyses**

Gianfranco Frigerio, Chiara Matilde Ferrari, and Silvia Fustinoni

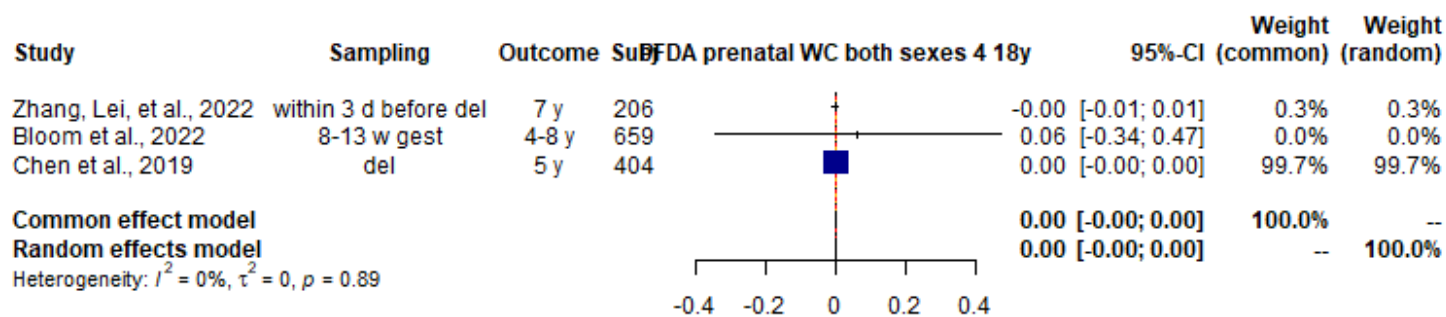

# Prenatal and childhood exposure to per-/polyfluoroalkyl substances (PFASs) and its associations with childhood overweight and/or obesity: a systematic review with meta-analyses

Gianfranco Frigerio, Chiara Matilde Ferrari, and Silvia Fustinoni

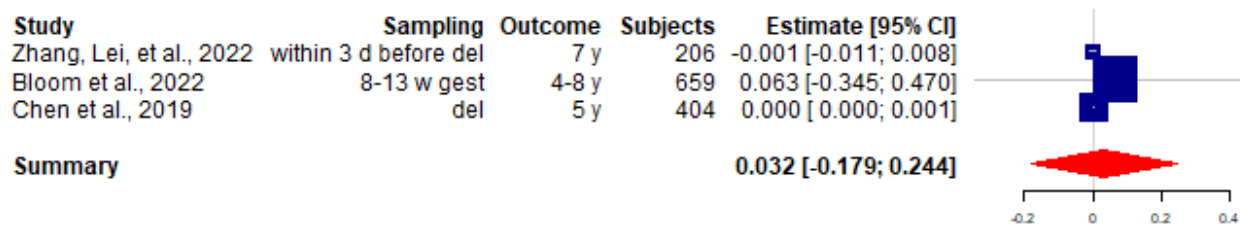

Prenatal and childhood exposure to per-/polyfluoroalkyl substances (PFASs) and its associations with childhood overweight and/or obesity: a systematic review with meta-analyses

Gianfranco Frigerio, Chiara Matilde Ferrari, and Silvia Fustinoni

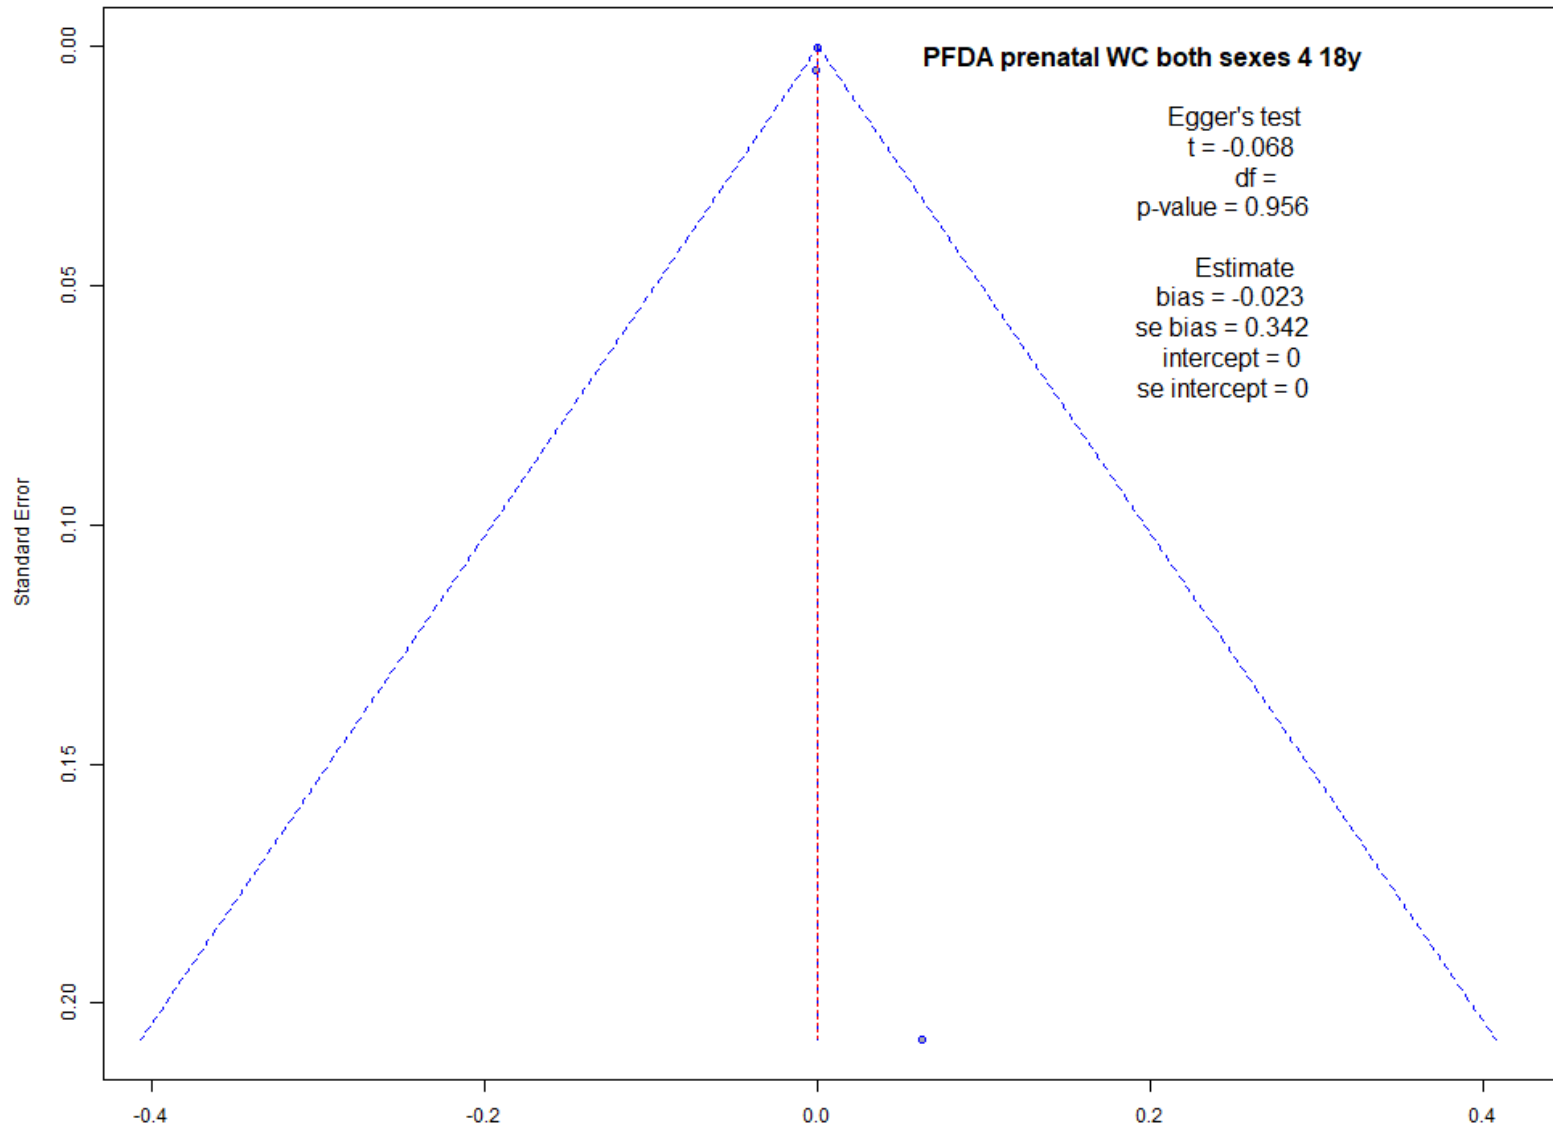

**Prenatal and childhood exposure to per-/polyfluoroalkyl substances (PFASs) and its associations with childhood overweight and/or obesity: a systematic review with meta-analyses**

Gianfranco Frigerio, Chiara Matilde Ferrari, and Silvia Fustinoni

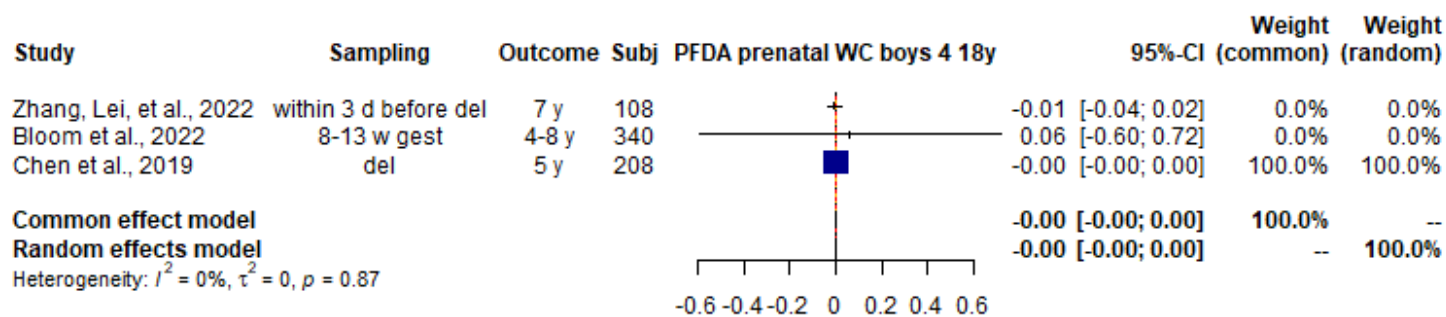

# Prenatal and childhood exposure to per-/polyfluoroalkyl substances (PFASs) and its associations with childhood overweight and/or obesity: a systematic review with meta-analyses

Gianfranco Frigerio, Chiara Matilde Ferrari, and Silvia Fustinoni

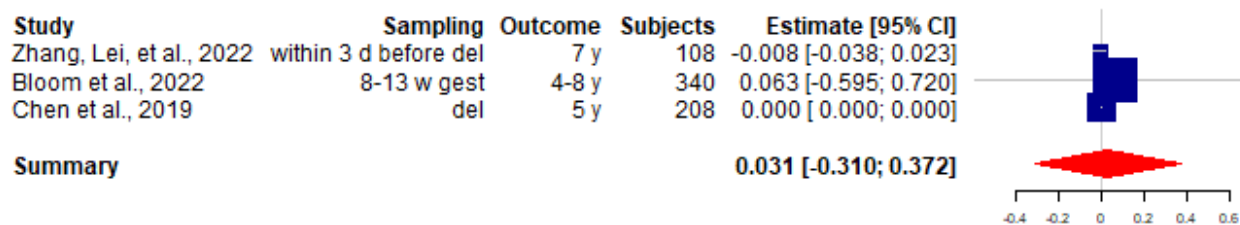

Prenatal and childhood exposure to per-/polyfluoroalkyl substances (PFASs) and its associations with childhood overweight and/or obesity: a systematic review with meta-analyses

Gianfranco Frigerio, Chiara Matilde Ferrari, and Silvia Fustinoni

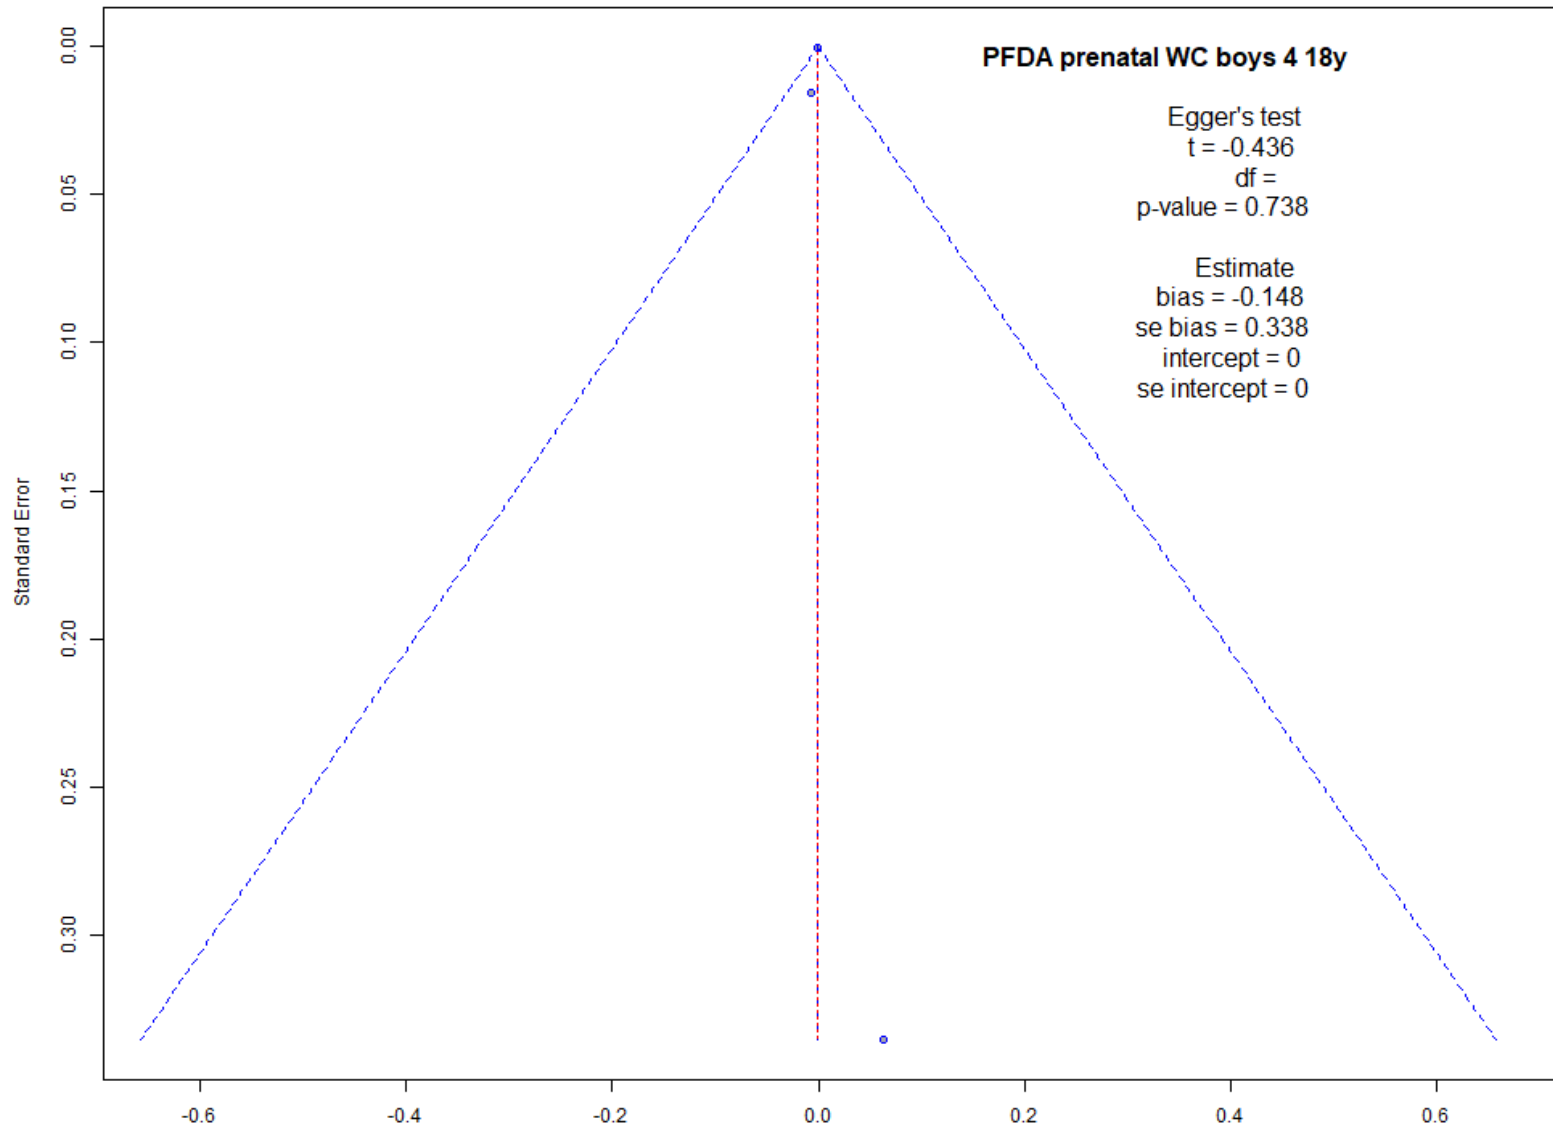

**Prenatal and childhood exposure to per-/polyfluoroalkyl substances (PFASs) and its associations with childhood overweight and/or obesity: a systematic review with meta-analyses**

Gianfranco Frigerio, Chiara Matilde Ferrari, and Silvia Fustinoni

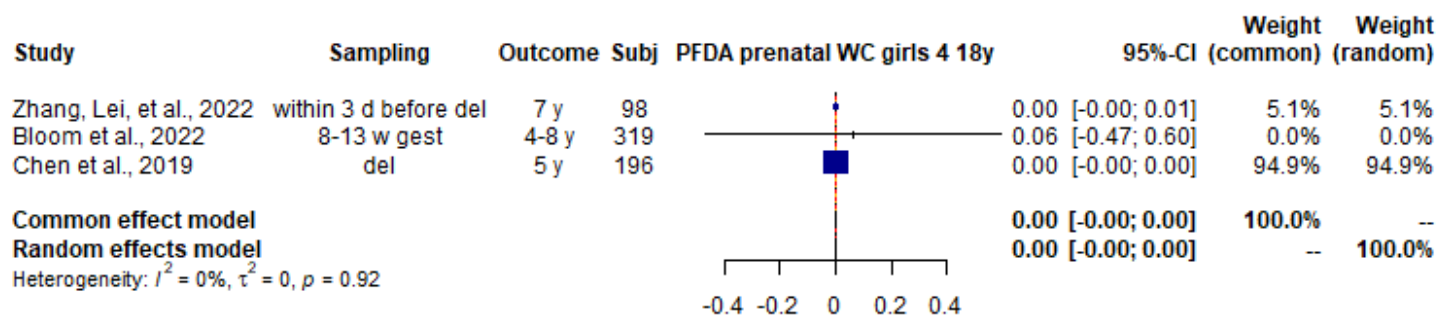



# Prenatal and childhood exposure to per-/polyfluoroalkyl substances (PFASs) and its associations with childhood overweight and/or obesity: a systematic review with meta-analyses

Gianfranco Frigerio, Chiara Matilde Ferrari, and Silvia Fustinoni

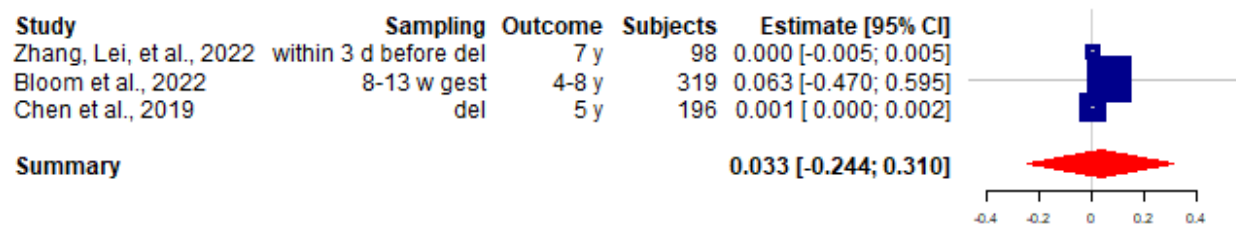

Prenatal and childhood exposure to per-/polyfluoroalkyl substances (PFASs) and its associations with childhood overweight and/or obesity: a systematic review with meta-analyses

Gianfranco Frigerio, Chiara Matilde Ferrari, and Silvia Fustinoni

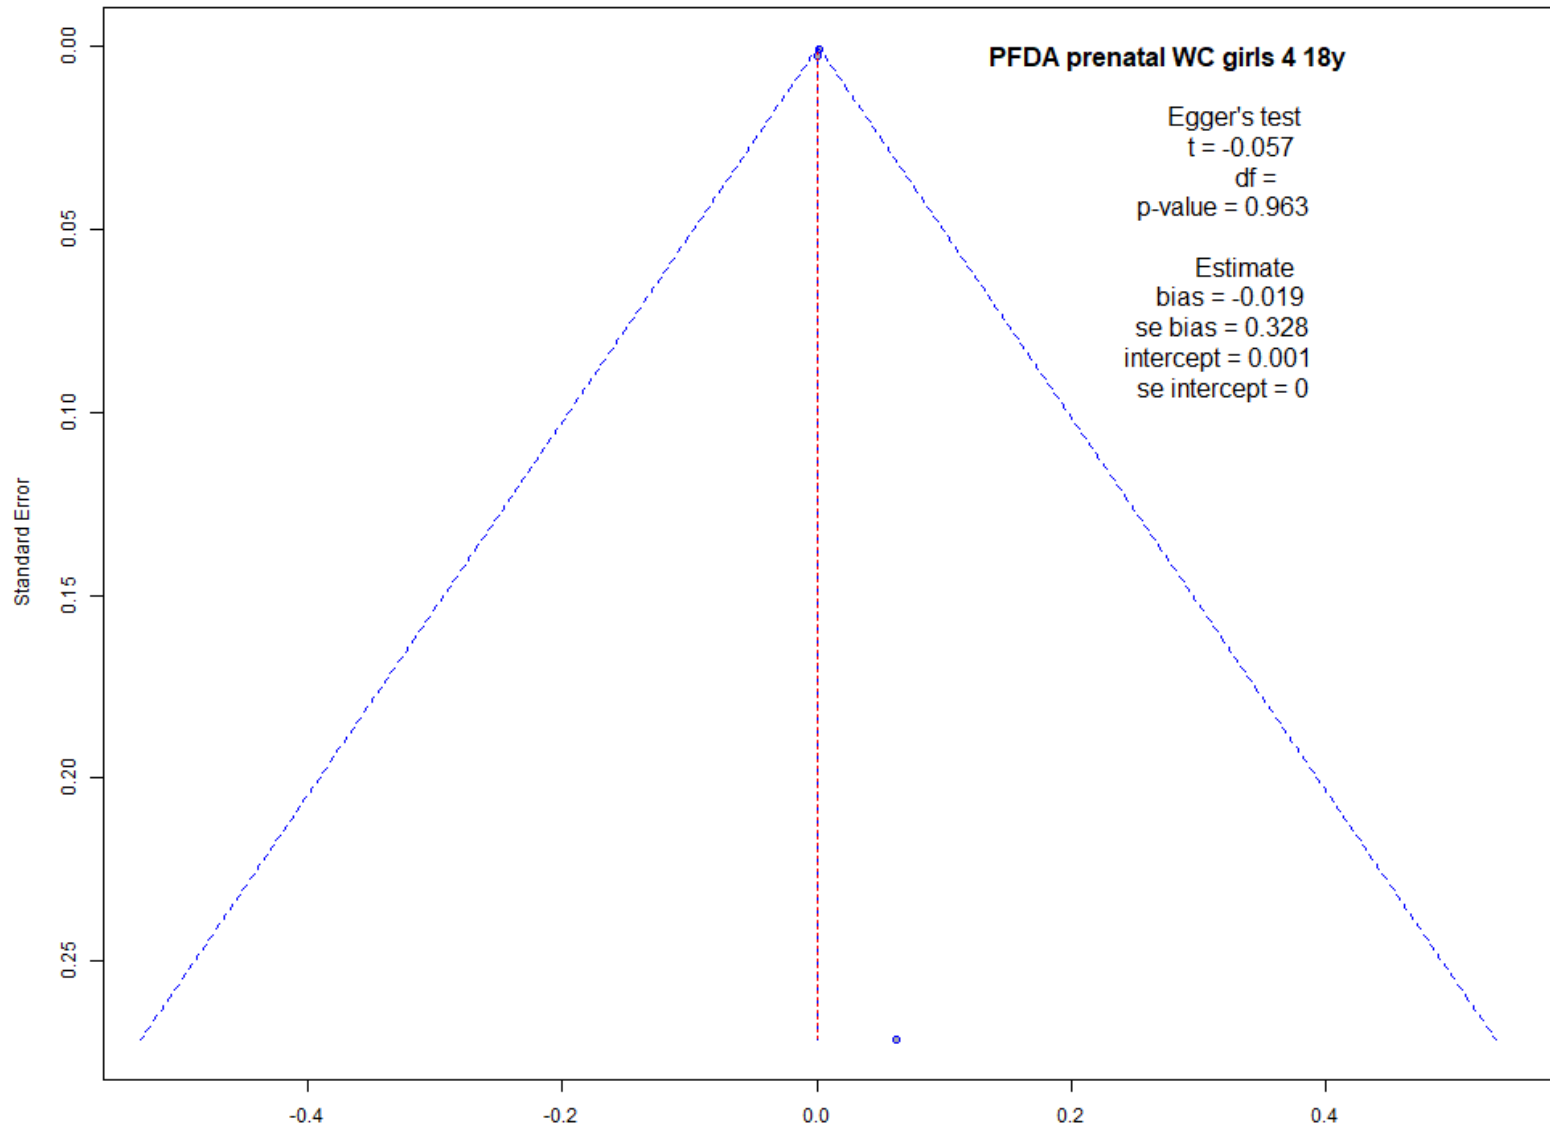

Prenatal and childhood exposure to per-/polyfluoroalkyl substances (PFASs) and its associations with childhood overweight and/or obesity: a systematic review with meta-analyses

Gianfranco Frigerio, Chiara Matilde Ferrari, and Silvia Fustinoni

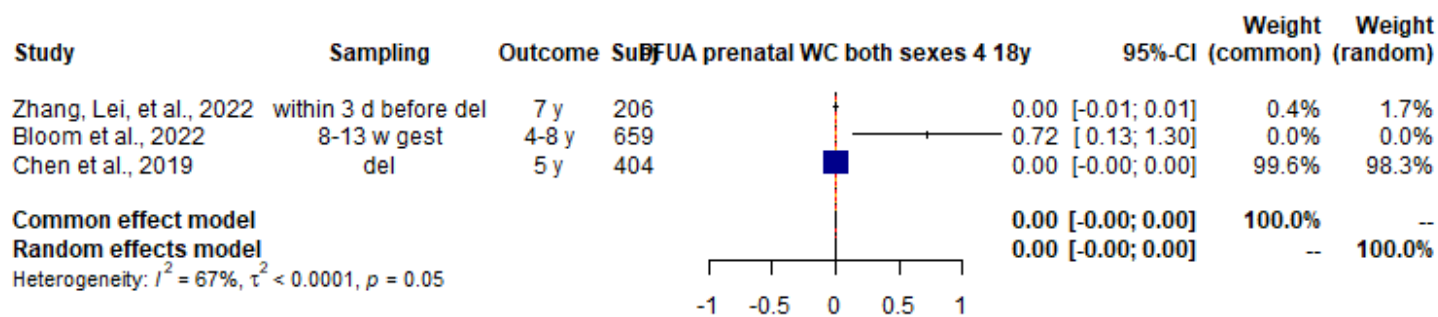

# Prenatal and childhood exposure to per-/polyfluoroalkyl substances (PFASs) and its associations with childhood overweight and/or obesity: a systematic review with meta-analyses

Gianfranco Frigerio, Chiara Matilde Ferrari, and Silvia Fustinoni

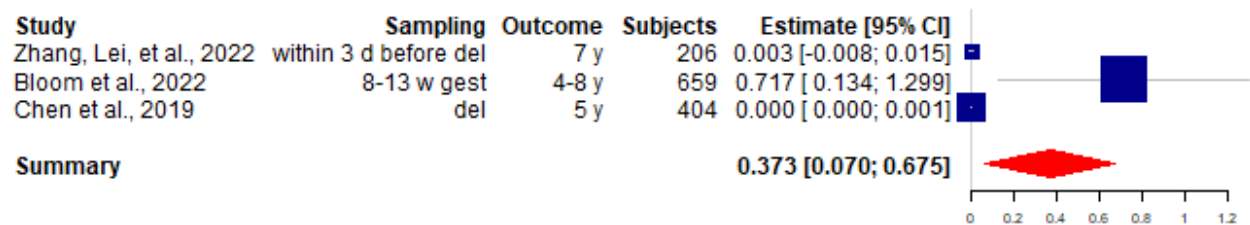

Prenatal and childhood exposure to per-/polyfluoroalkyl substances (PFASs) and its associations with childhood overweight and/or obesity: a systematic review with meta-analyses

Gianfranco Frigerio, Chiara Matilde Ferrari, and Silvia Fustinoni

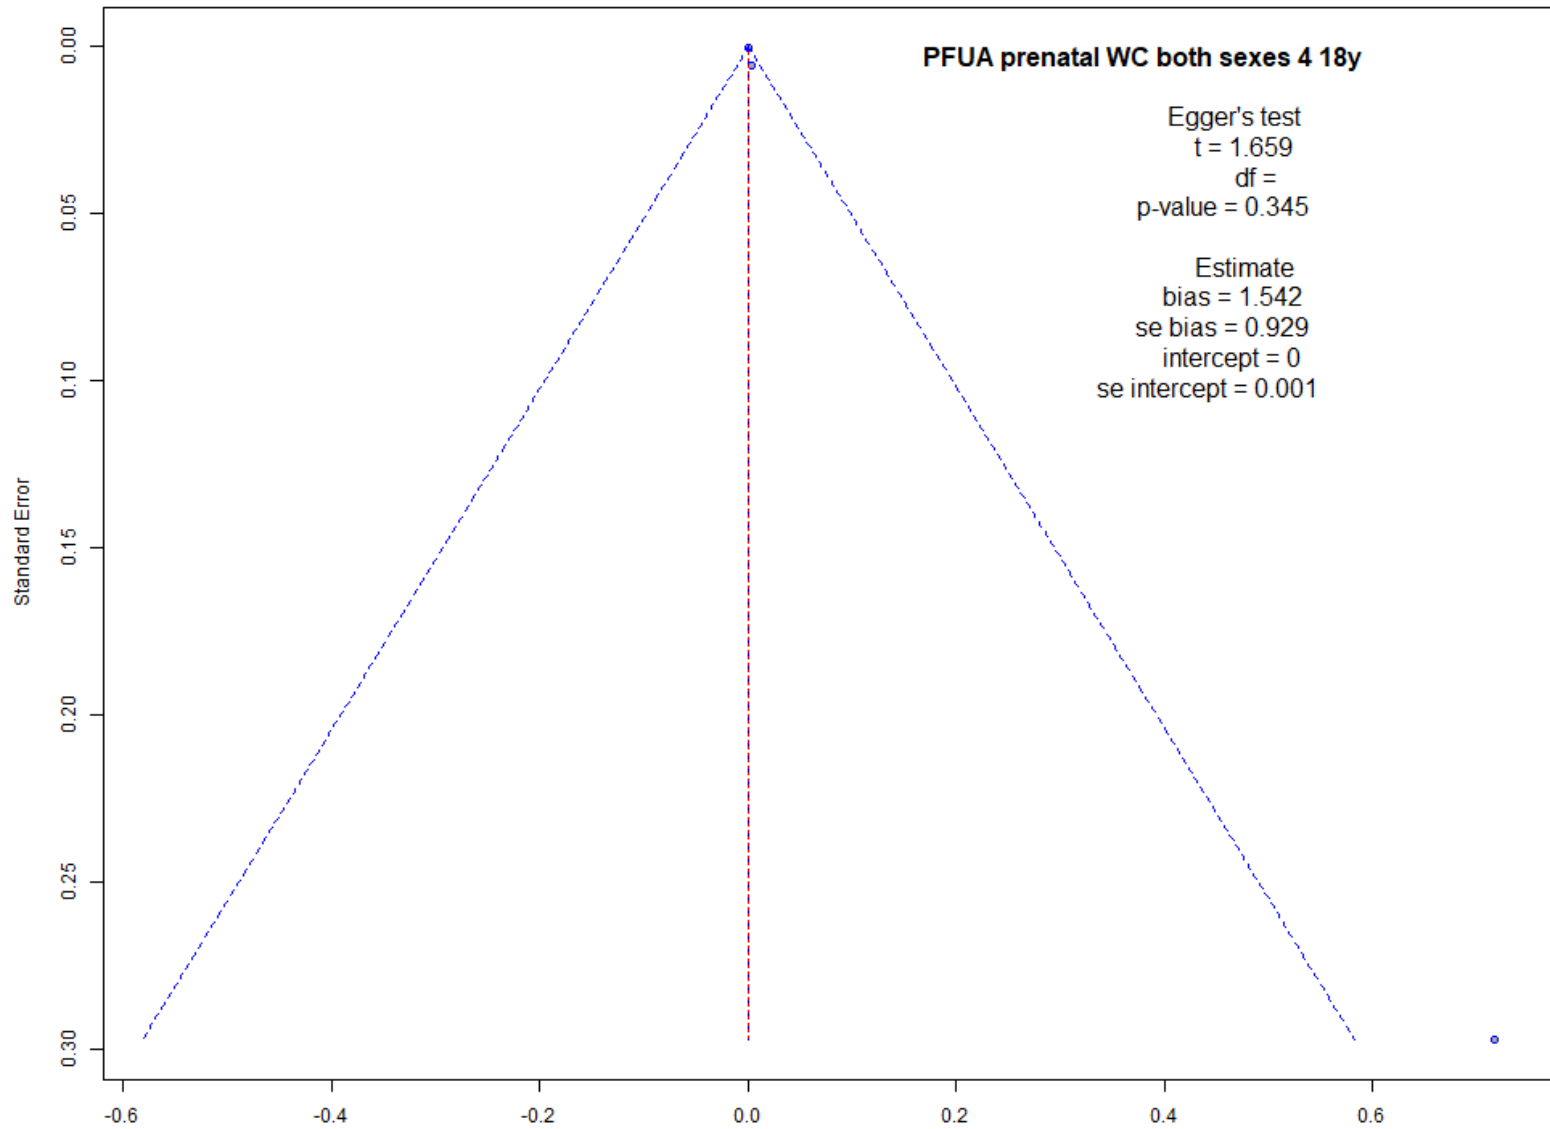

**Prenatal and childhood exposure to per-/polyfluoroalkyl substances (PFASs) and its associations with childhood overweight and/or obesity: a systematic review with meta-analyses**

Gianfranco Frigerio, Chiara Matilde Ferrari, and Silvia Fustinoni

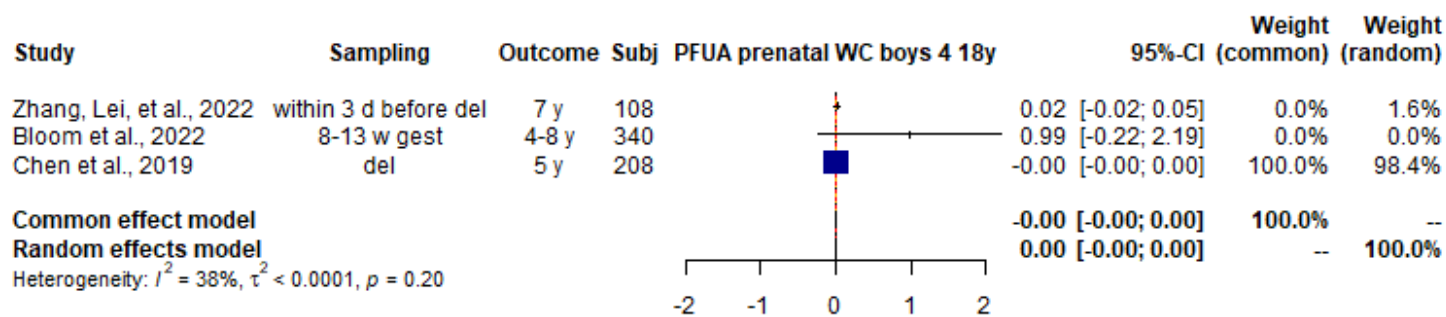

# Prenatal and childhood exposure to per-/polyfluoroalkyl substances (PFASs) and its associations with childhood overweight and/or obesity: a systematic review with meta-analyses

Gianfranco Frigerio, Chiara Matilde Ferrari, and Silvia Fustinoni

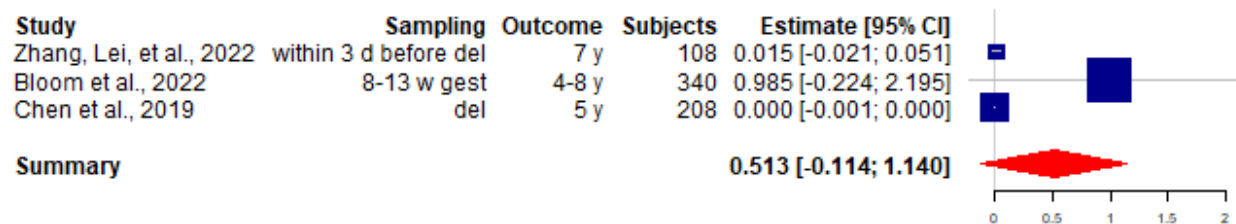

Prenatal and childhood exposure to per-/polyfluoroalkyl substances (PFASs) and its associations with childhood overweight and/or obesity: a systematic review with meta-analyses

Gianfranco Frigerio, Chiara Matilde Ferrari, and Silvia Fustinoni

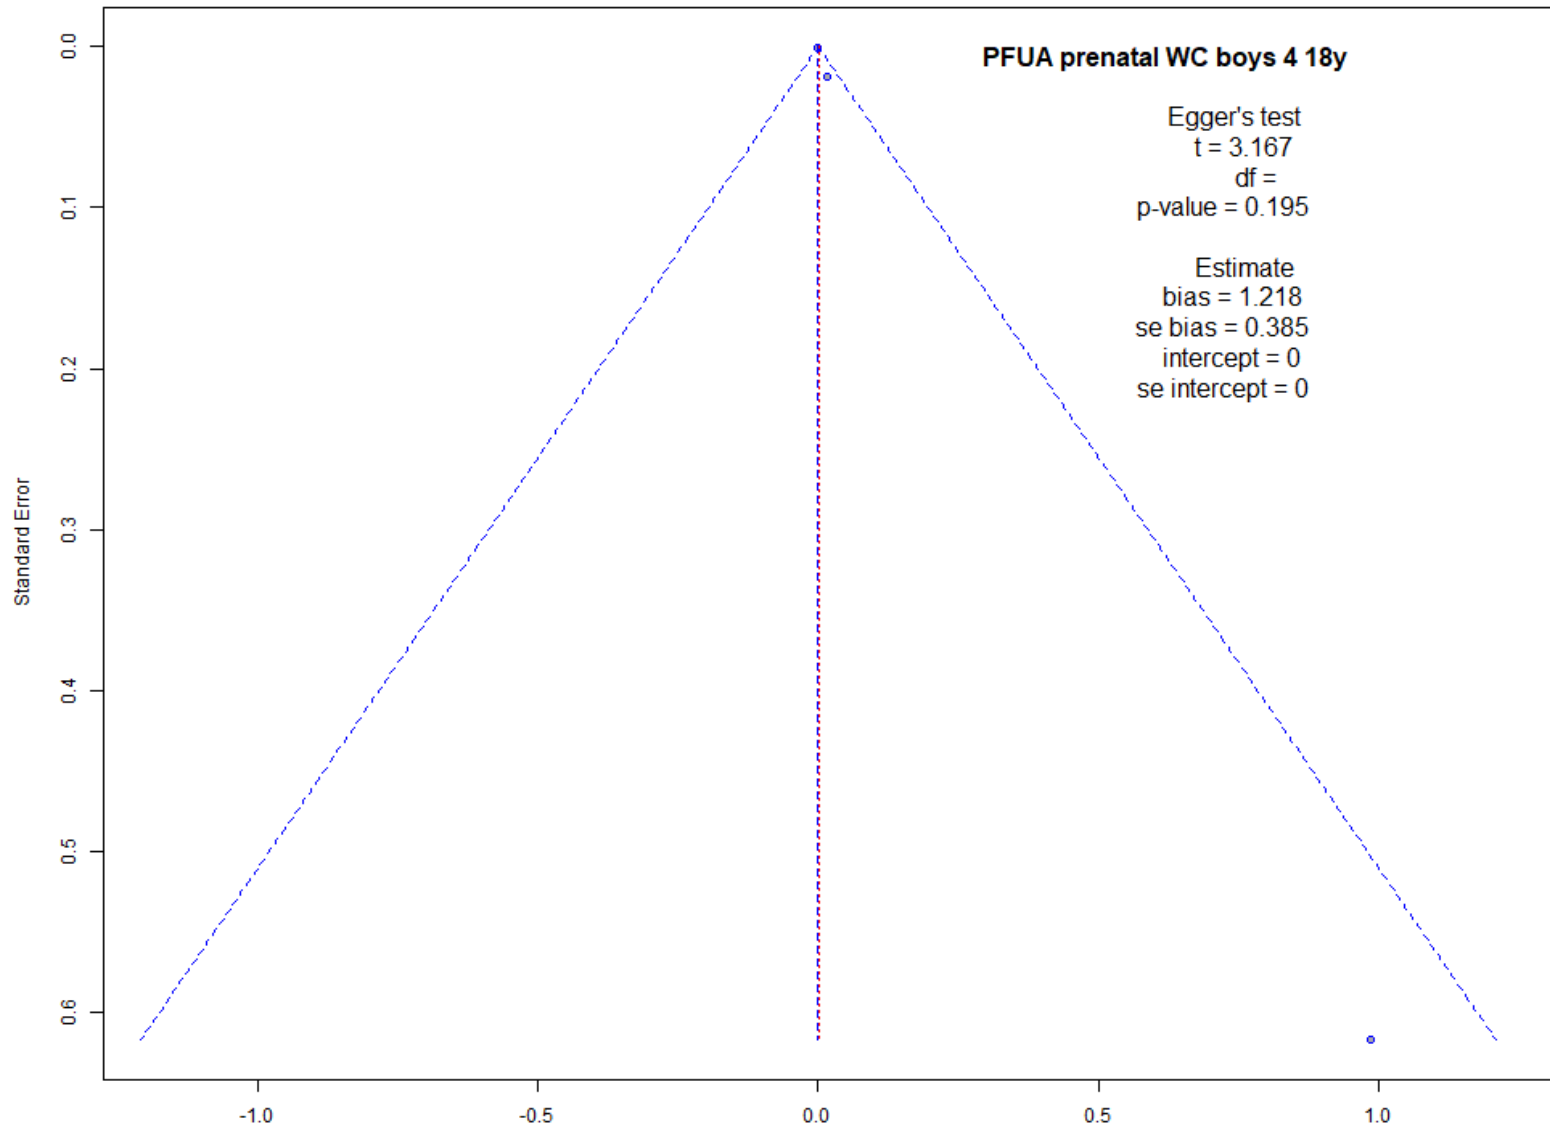



**Prenatal and childhood exposure to per-/polyfluoroalkyl substances (PFASs) and its associations with childhood overweight and/or obesity: a systematic review with meta-analyses**

Gianfranco Frigerio, Chiara Matilde Ferrari, and Silvia Fustinoni

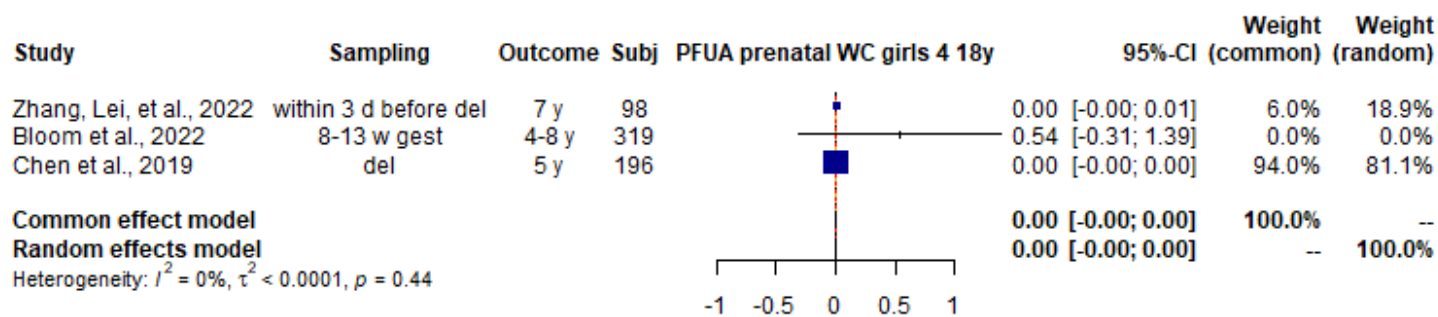

# Prenatal and childhood exposure to per-/polyfluoroalkyl substances (PFASs) and its associations with childhood overweight and/or obesity: a systematic review with meta-analyses

Gianfranco Frigerio, Chiara Matilde Ferrari, and Silvia Fustinoni

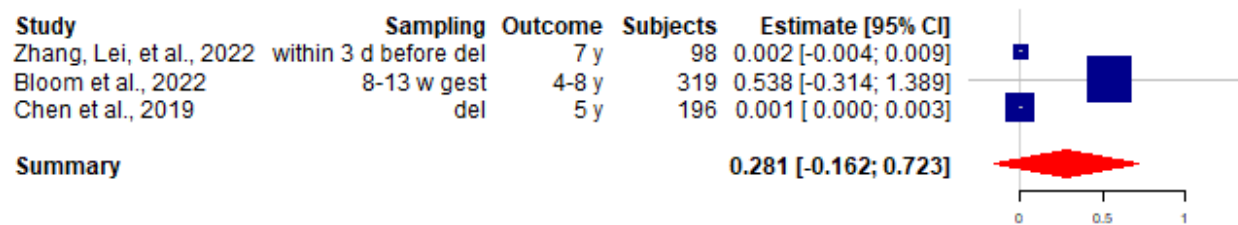

Prenatal and childhood exposure to per-/polyfluoroalkyl substances (PFASs) and its associations with childhood overweight and/or obesity: a systematic review with meta-analyses

Gianfranco Frigerio, Chiara Matilde Ferrari, and Silvia Fustinoni

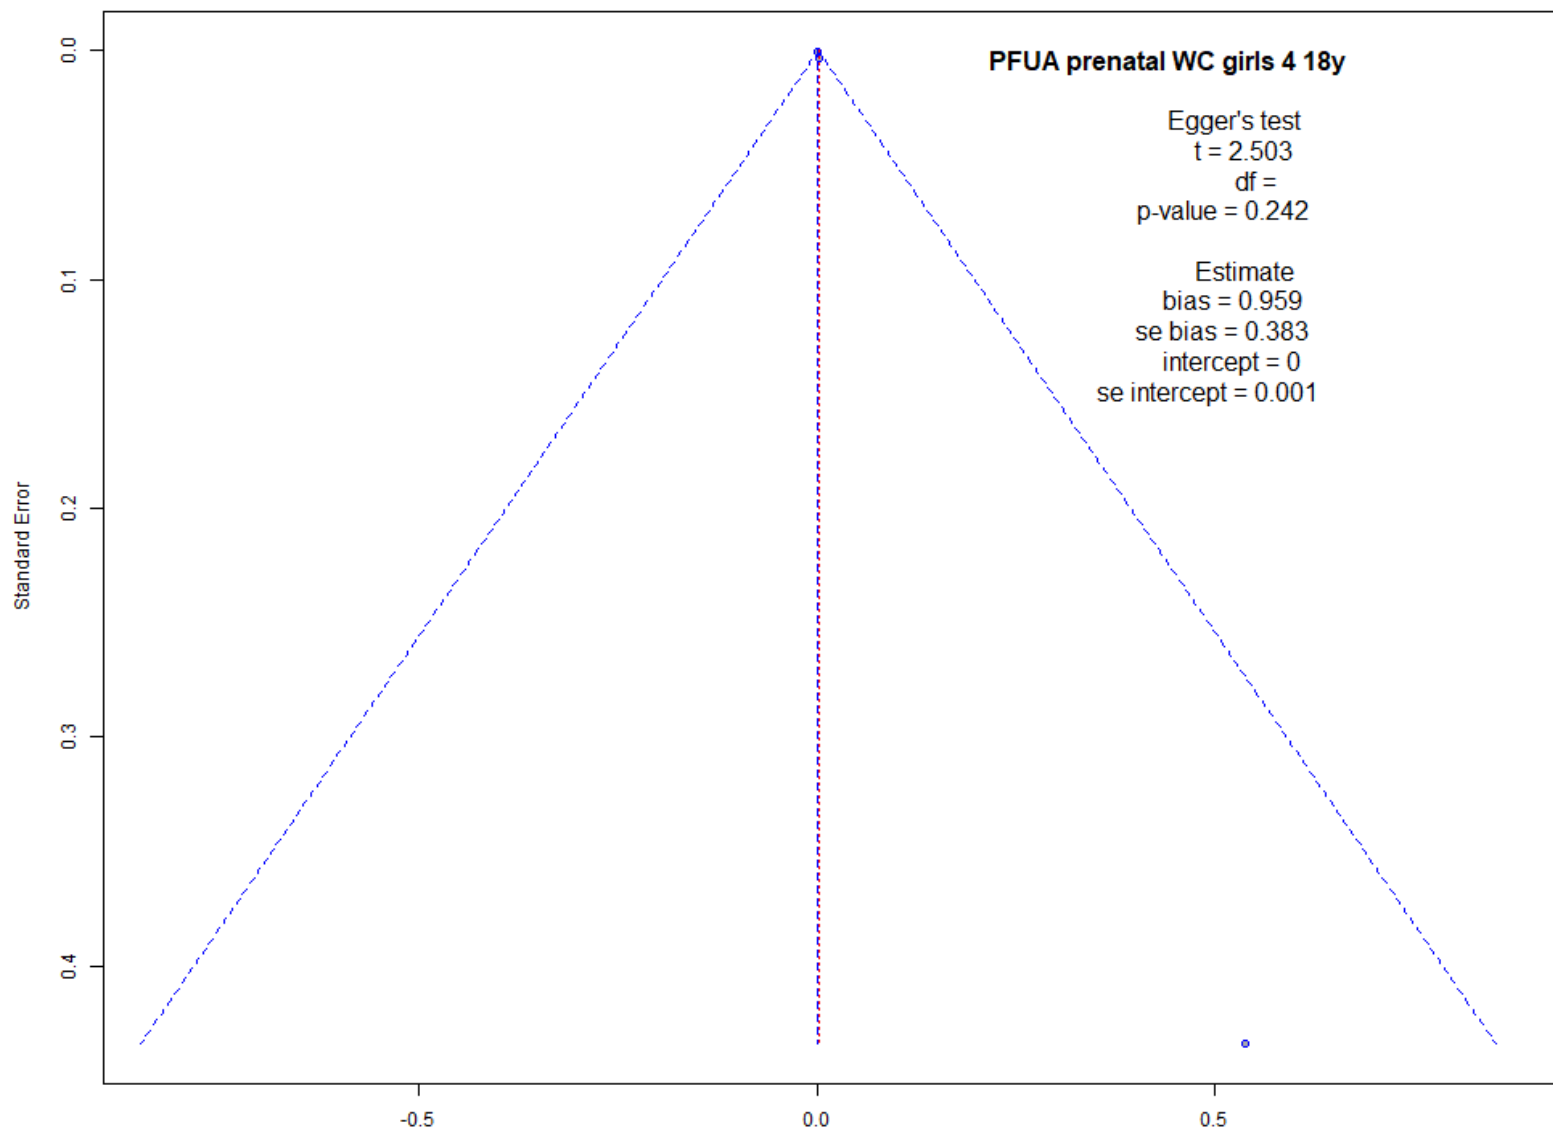

# Prenatal and childhood exposure to per-/polyfluoroalkyl substances (PFASs) and its associations with childhood overweight and/or obesity: a systematic review with meta-analyses

Gianfranco Frigerio, Chiara Matilde Ferrari, and Silvia Fustinoni

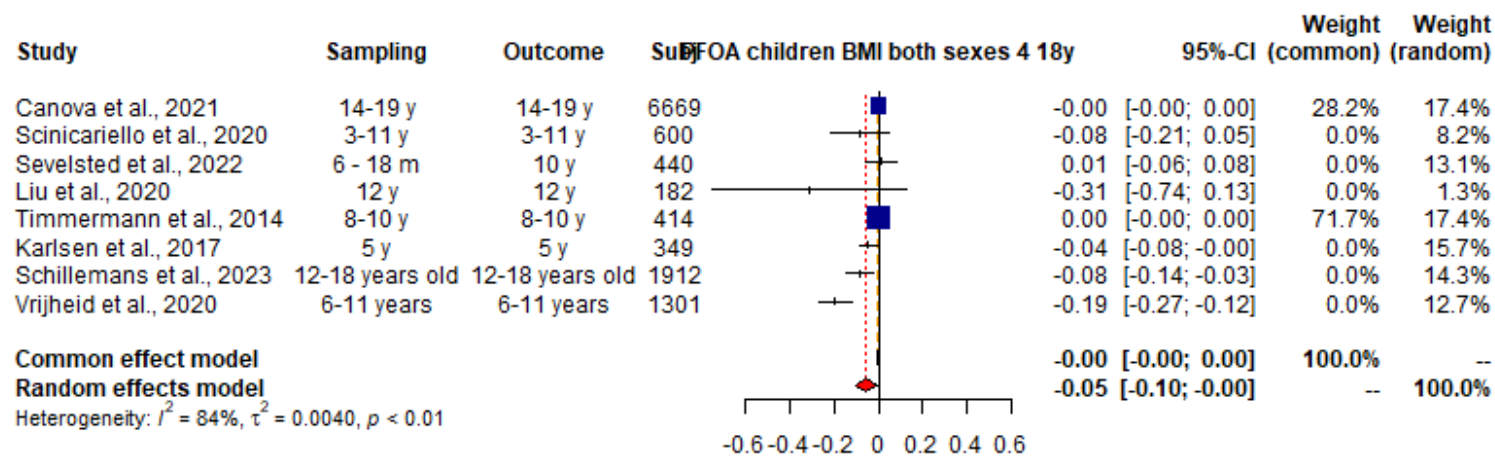

# Prenatal and childhood exposure to per-/polyfluoroalkyl substances (PFASs) and its associations with childhood overweight and/or obesity: a systematic review with meta-analyses

Gianfranco Frigerio, Chiara Matilde Ferrari, and Silvia Fustinoni

| Study                      | Sampling        | Outcome         | Subjects | Estimate [95% CI]              |
|----------------------------|-----------------|-----------------|----------|--------------------------------|
| Canova et al., 2021        | 14-19 y         | 14-19 y         | 6669     | -0.001 [-0.001; 0.000]         |
| Scinicariello et al., 2020 | 3-11 y          | 3-11 y          | 600      | -0.080 [-0.210; 0.050]         |
| Sevelsted et al., 2022     | 6 - 18 m        | 10 y            | 440      | 0.010 [-0.060; 0.080]          |
| Liu et al., 2020           | 12 y            | 12 y            | 182      | -0.306 [-0.741; 0.129]         |
| Timmermann et al., 2014    | 8-10 y          | 8-10 y          | 414      | 0.000 [0.000; 0.001]           |
| Karlsen et al., 2017       | 5 y             | 5 y             | 349      | -0.044 [-0.085; -0.003]        |
| Schillemans et al., 2023   | 12-18 years old | 12-18 years old | 1912     | -0.083 [-0.141; -0.026]        |
| Vrijheid et al., 2020      | 6-11 years      | 6-11 years      | 1301     | -0.193 [-0.267; -0.118]        |
| <b>Summary</b>             |                 |                 |          | <b>-0.045 [-0.060; -0.029]</b> |



Prenatal and childhood exposure to per-/polyfluoroalkyl substances (PFASs) and its associations with childhood overweight and/or obesity: a systematic review with meta-analyses

Gianfranco Frigerio, Chiara Matilde Ferrari, and Silvia Fustinoni

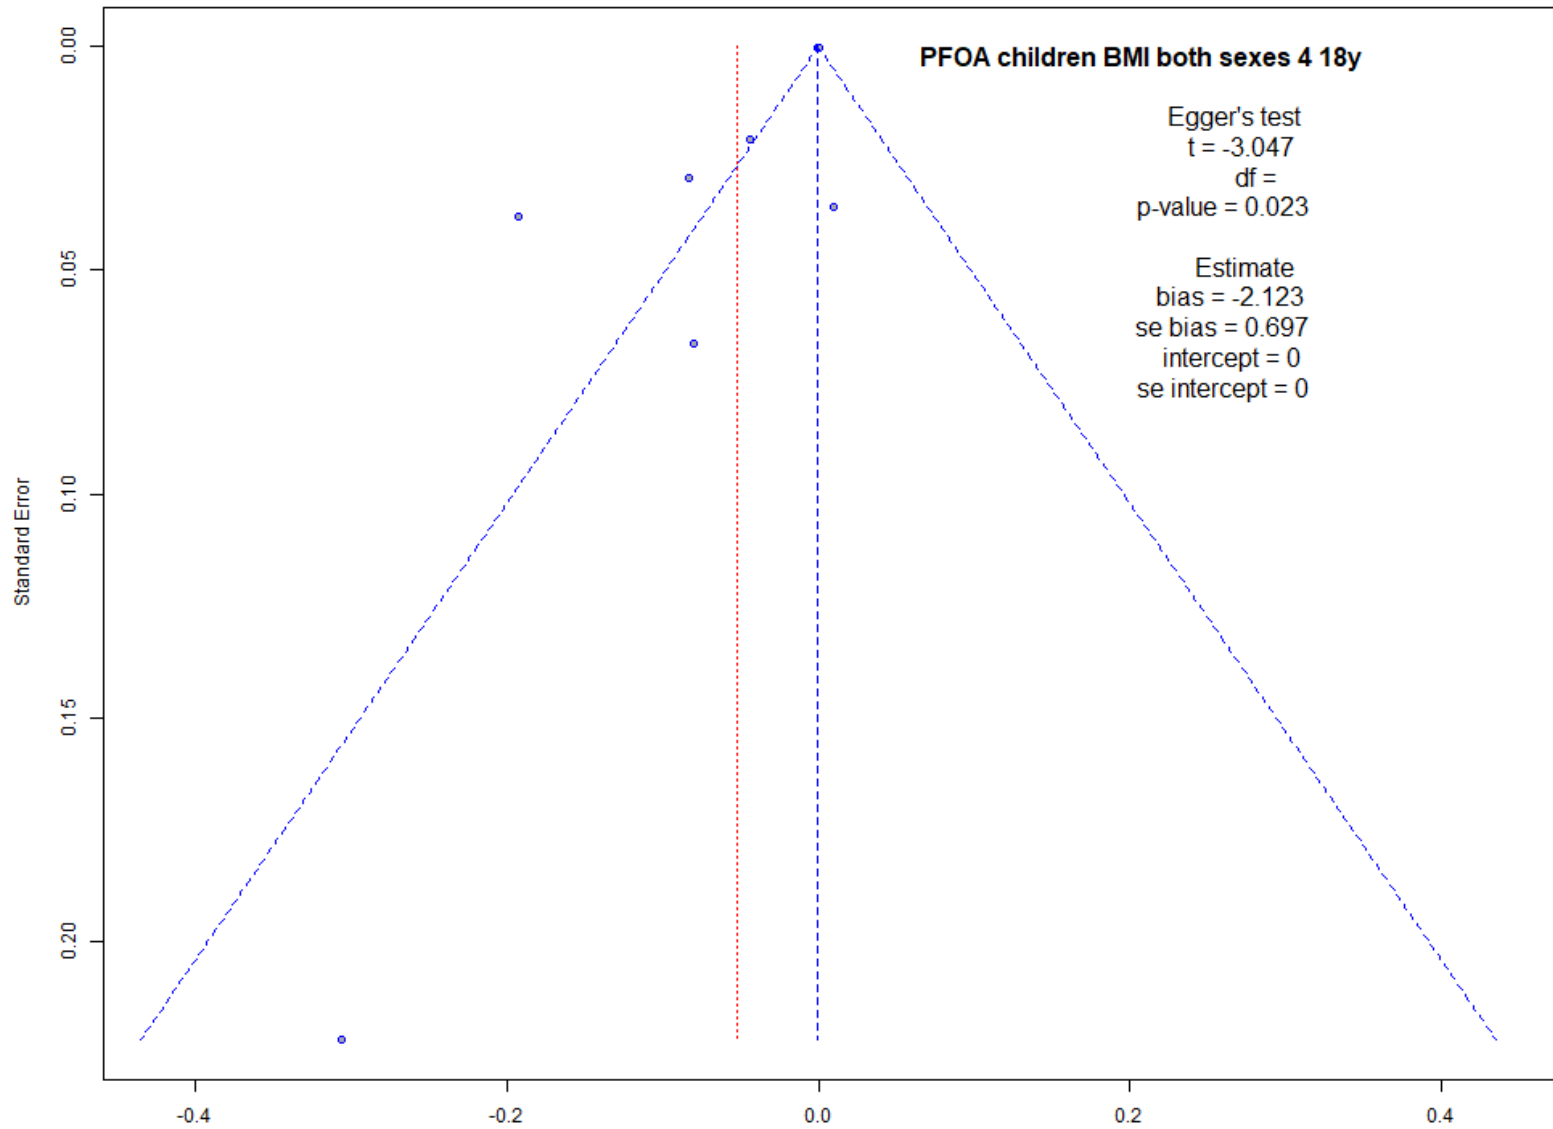

Prenatal and childhood exposure to per-/polyfluoroalkyl substances (PFASs) and its associations with childhood overweight and/or obesity: a systematic review with meta-analyses

Gianfranco Frigerio, Chiara Matilde Ferrari, and Silvia Fustinoni

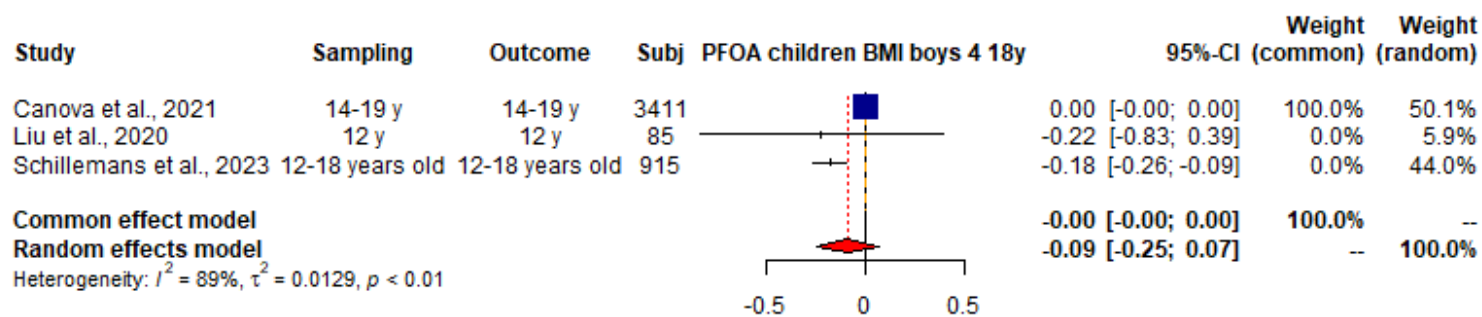

# Prenatal and childhood exposure to per-/polyfluoroalkyl substances (PFASs) and its associations with childhood overweight and/or obesity: a systematic review with meta-analyses

Gianfranco Frigerio, Chiara Matilde Ferrari, and Silvia Fustinoni





Prenatal and childhood exposure to per-/polyfluoroalkyl substances (PFASs) and its associations with childhood overweight and/or obesity: a systematic review with meta-analyses

Gianfranco Frigerio, Chiara Matilde Ferrari, and Silvia Fustinoni

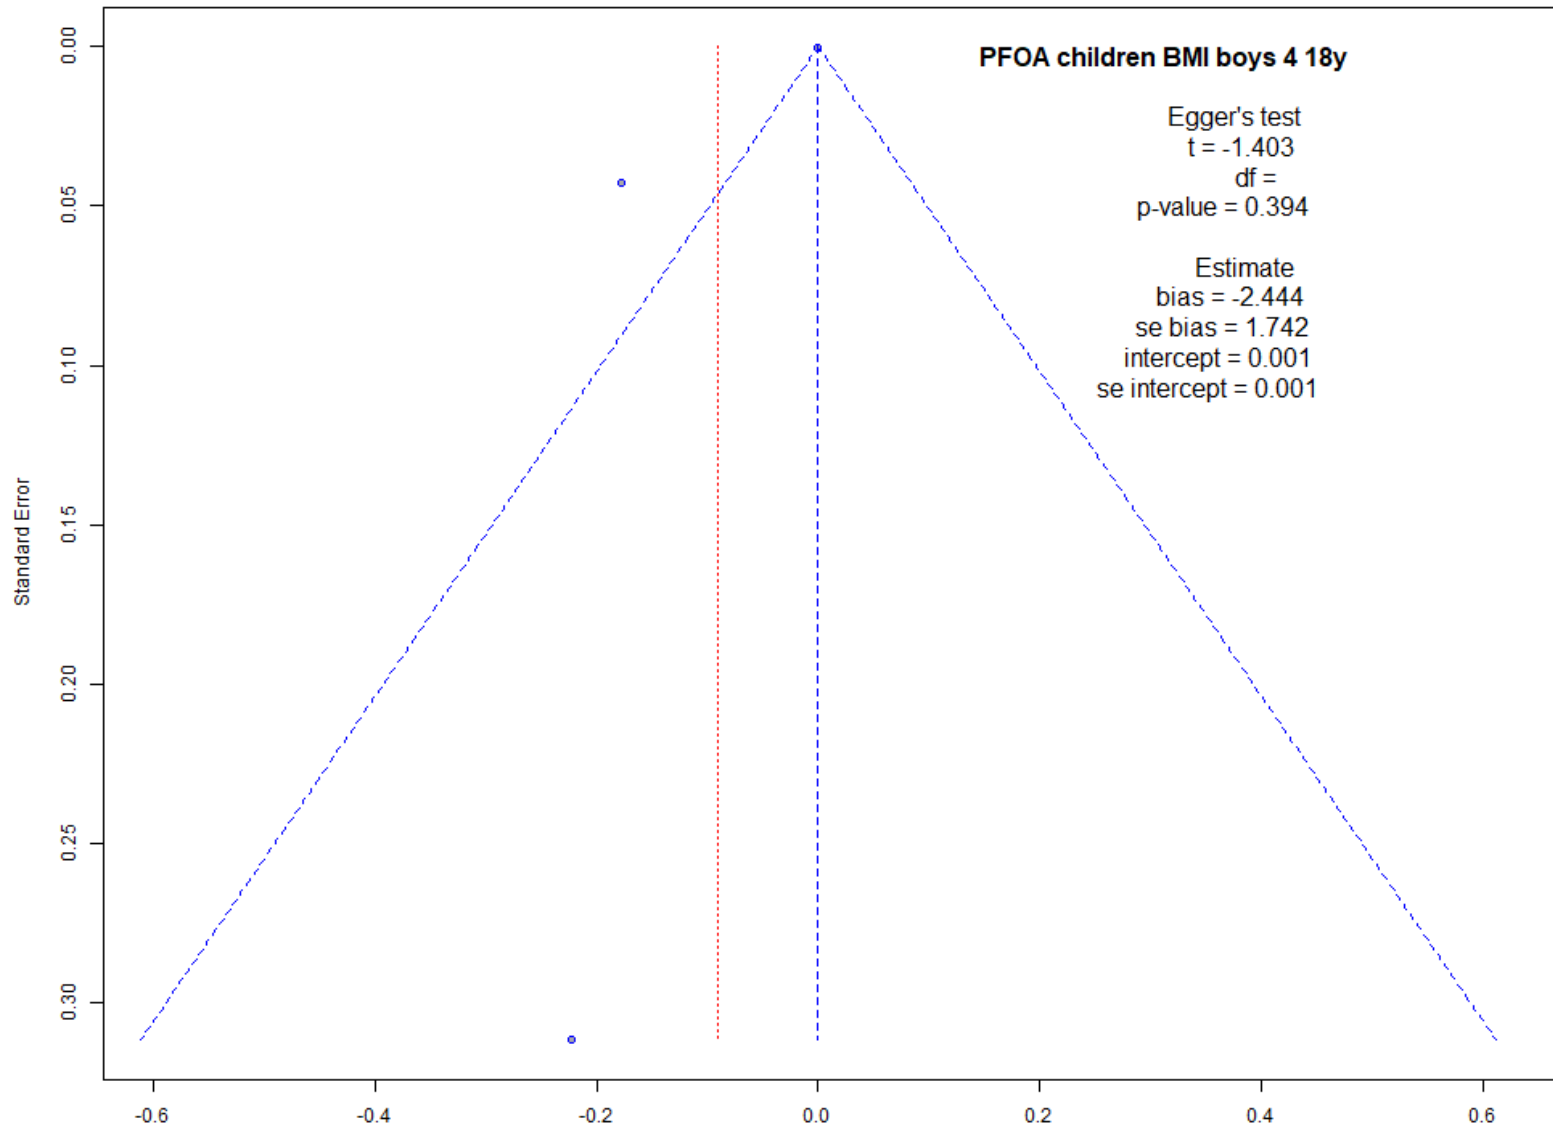

**Prenatal and childhood exposure to per-/polyfluoroalkyl substances (PFASs) and its associations with childhood overweight and/or obesity: a systematic review with meta-analyses**

Gianfranco Frigerio, Chiara Matilde Ferrari, and Silvia Fustinoni

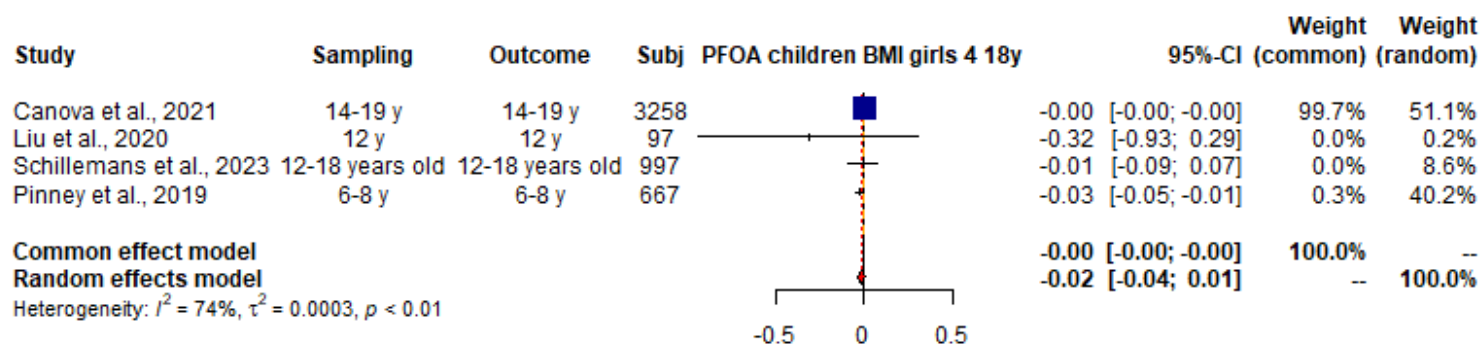

**Prenatal and childhood exposure to per-/polyfluoroalkyl substances (PFASs) and its associations with childhood overweight and/or obesity: a systematic review with meta-analyses**

Gianfranco Frigerio, Chiara Matilde Ferrari, and Silvia Fustinoni

| Study                    | Sampling        | Outcome         | Subjects | Estimate [95% CI]             |
|--------------------------|-----------------|-----------------|----------|-------------------------------|
| Canova et al., 2021      | 14-19 y         | 14-19 y         | 3258     | -0.002 [-0.003; -0.001]       |
| Liu et al., 2020         | 12 y            | 12 y            | 97       | -0.316 [-0.926; 0.295]        |
| Schillemans et al., 2023 | 12-18 years old | 12-18 years old | 997      | -0.010 [-0.089; 0.068]        |
| Pinney et al., 2019      | 6-8 y           | 6-8 y           | 667      | -0.032 [-0.050; -0.013]       |
| <b>Summary</b>           |                 |                 |          | <b>-0.013 [-0.046; 0.019]</b> |

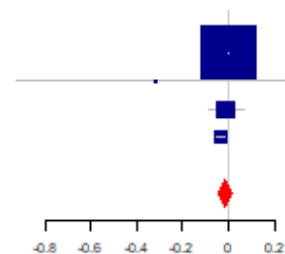

Prenatal and childhood exposure to per-/polyfluoroalkyl substances (PFASs) and its associations with childhood overweight and/or obesity: a systematic review with meta-analyses

Gianfranco Frigerio, Chiara Matilde Ferrari, and Silvia Fustinoni

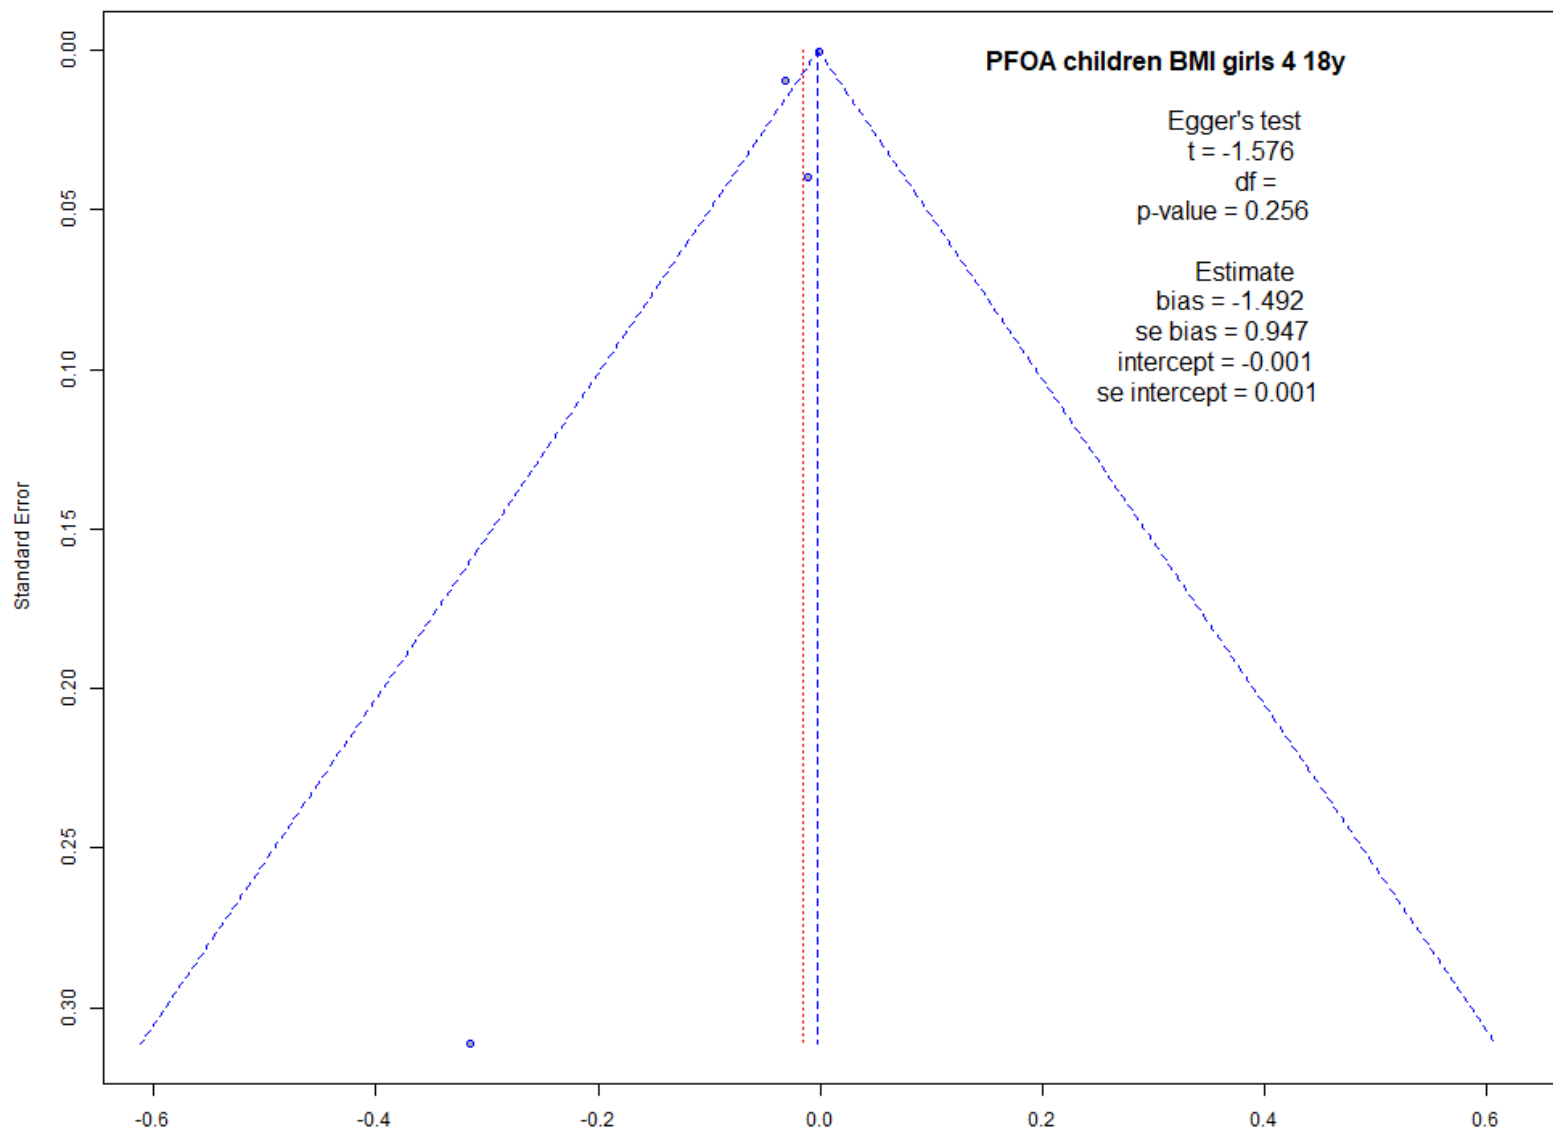

Prenatal and childhood exposure to per-/polyfluoroalkyl substances (PFASs) and its associations with childhood overweight and/or obesity: a systematic review with meta-analyses

Gianfranco Frigerio, Chiara Matilde Ferrari, and Silvia Fustinoni

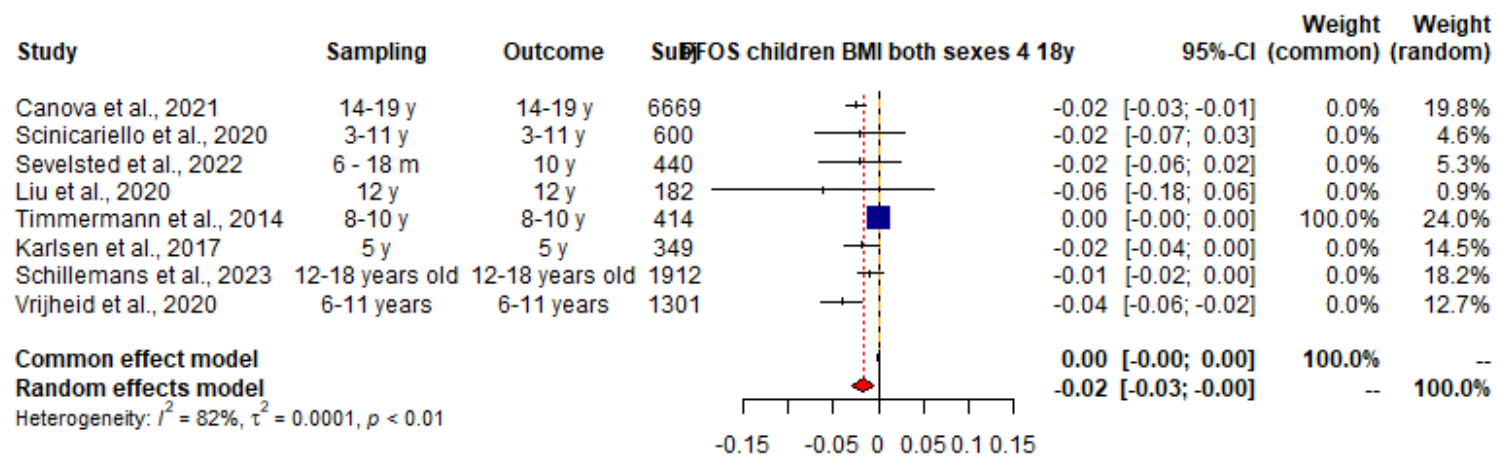

# Prenatal and childhood exposure to per-/polyfluoroalkyl substances (PFASs) and its associations with childhood overweight and/or obesity: a systematic review with meta-analyses

Gianfranco Frigerio, Chiara Matilde Ferrari, and Silvia Fustinoni

| Study                      | Sampling        | Outcome         | Subjects | Estimate [95% CI]              |
|----------------------------|-----------------|-----------------|----------|--------------------------------|
| Canova et al., 2021        | 14-19 y         | 14-19 y         | 6669     | -0.024 [-0.035; -0.013]        |
| Scinicariello et al., 2020 | 3-11 y          | 3-11 y          | 600      | -0.021 [-0.070; 0.029]         |
| Sevelsted et al., 2022     | 6 - 18 m        | 10 y            | 440      | -0.020 [-0.065; 0.025]         |
| Liu et al., 2020           | 12 y            | 12 y            | 182      | -0.061 [-0.183; 0.061]         |
| Timmermann et al., 2014    | 8-10 y          | 8-10 y          | 414      | 0.000 [0.000; 0.000]           |
| Karlsen et al., 2017       | 5 y             | 5 y             | 349      | -0.018 [-0.037; 0.002]         |
| Schillemans et al., 2023   | 12-18 years old | 12-18 years old | 1912     | -0.009 [-0.022; 0.004]         |
| Vrijheid et al., 2020      | 6-11 years      | 6-11 years      | 1301     | -0.040 [-0.063; -0.018]        |
| <b>Summary</b>             |                 |                 |          | <b>-0.023 [-0.041; -0.004]</b> |



Prenatal and childhood exposure to per-/polyfluoroalkyl substances (PFASs) and its associations with childhood overweight and/or obesity: a systematic review with meta-analyses

Gianfranco Frigerio, Chiara Matilde Ferrari, and Silvia Fustinoni

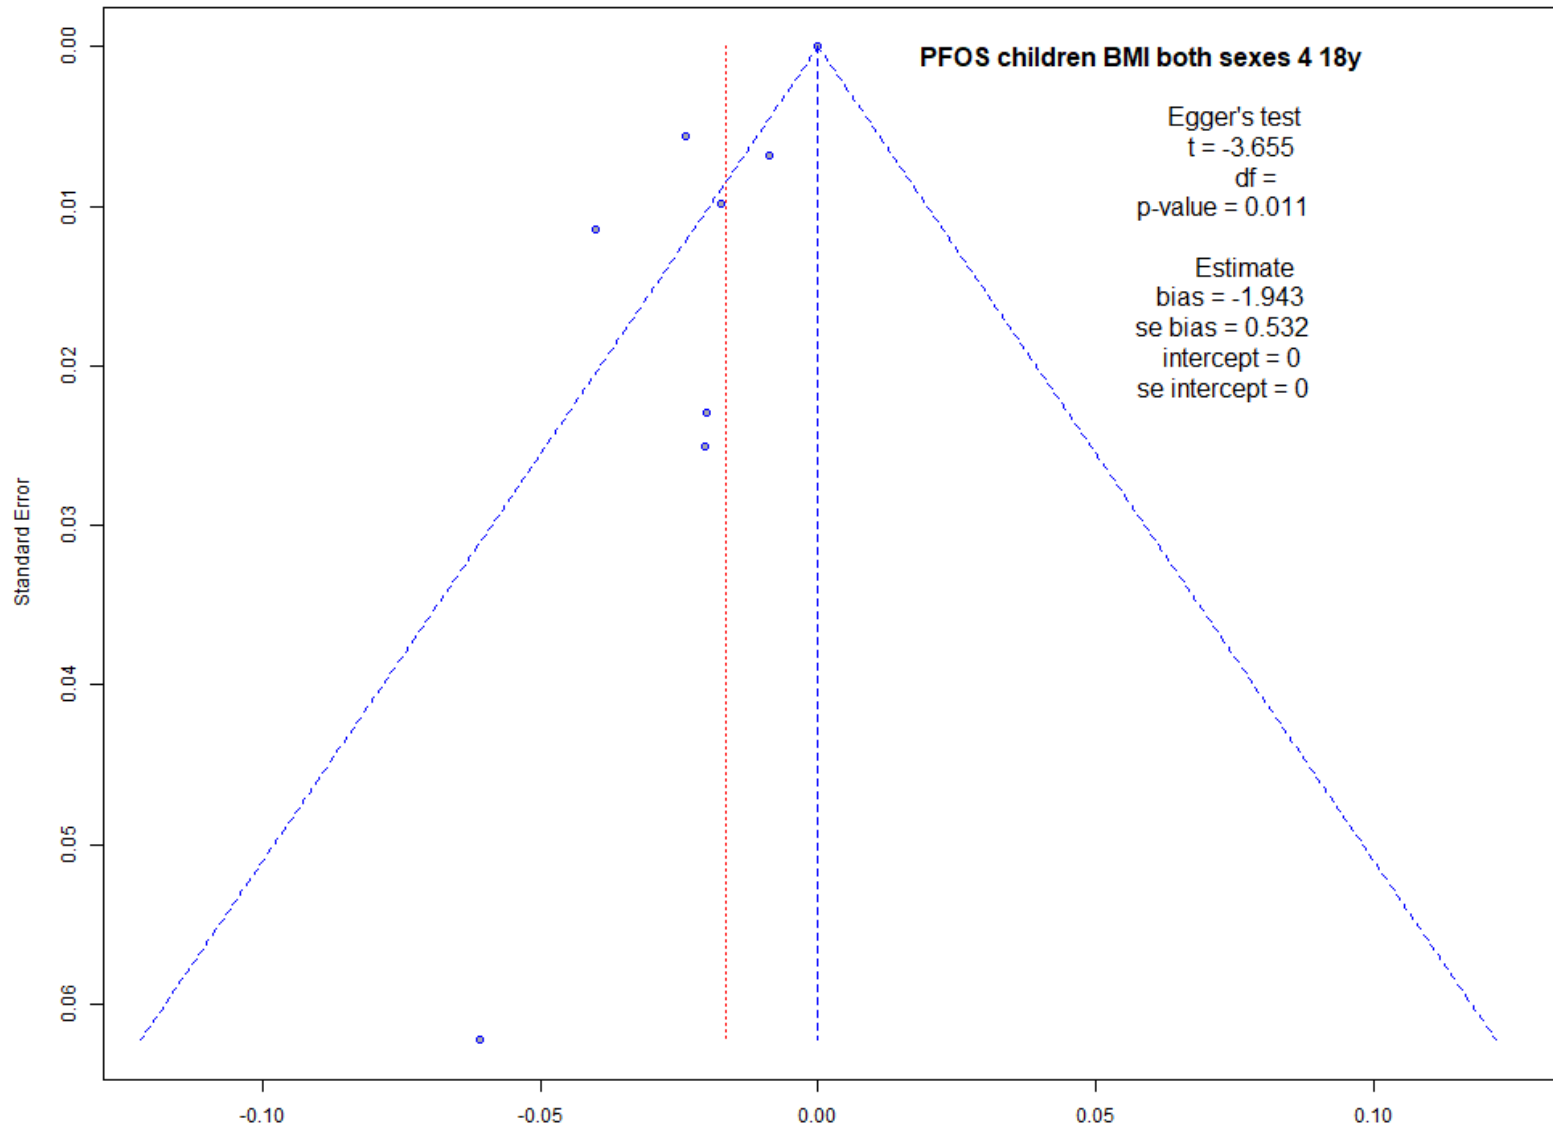

**Prenatal and childhood exposure to per-/polyfluoroalkyl substances (PFASs) and its associations with childhood overweight and/or obesity: a systematic review with meta-analyses**

Gianfranco Frigerio, Chiara Matilde Ferrari, and Silvia Fustinoni

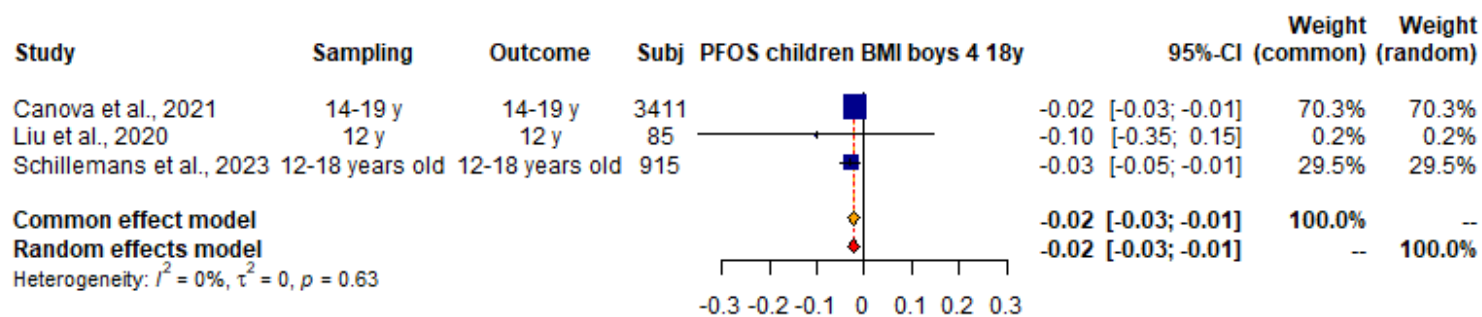



# Prenatal and childhood exposure to per-/polyfluoroalkyl substances (PFASs) and its associations with childhood overweight and/or obesity: a systematic review with meta-analyses

Gianfranco Frigerio, Chiara Matilde Ferrari, and Silvia Fustinoni

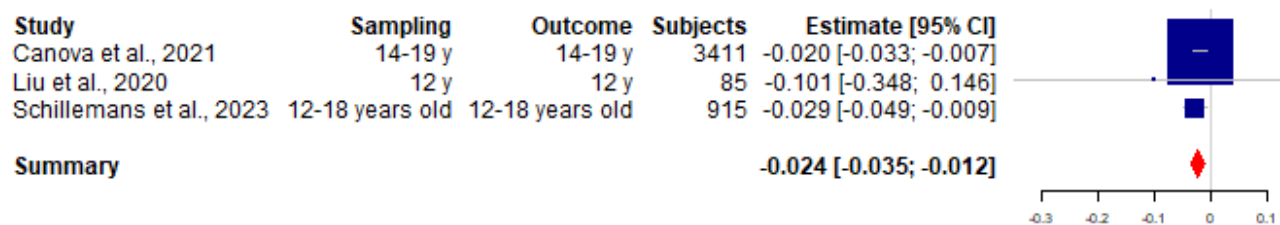

Prenatal and childhood exposure to per-/polyfluoroalkyl substances (PFASs) and its associations with childhood overweight and/or obesity: a systematic review with meta-analyses

Gianfranco Frigerio, Chiara Matilde Ferrari, and Silvia Fustinoni

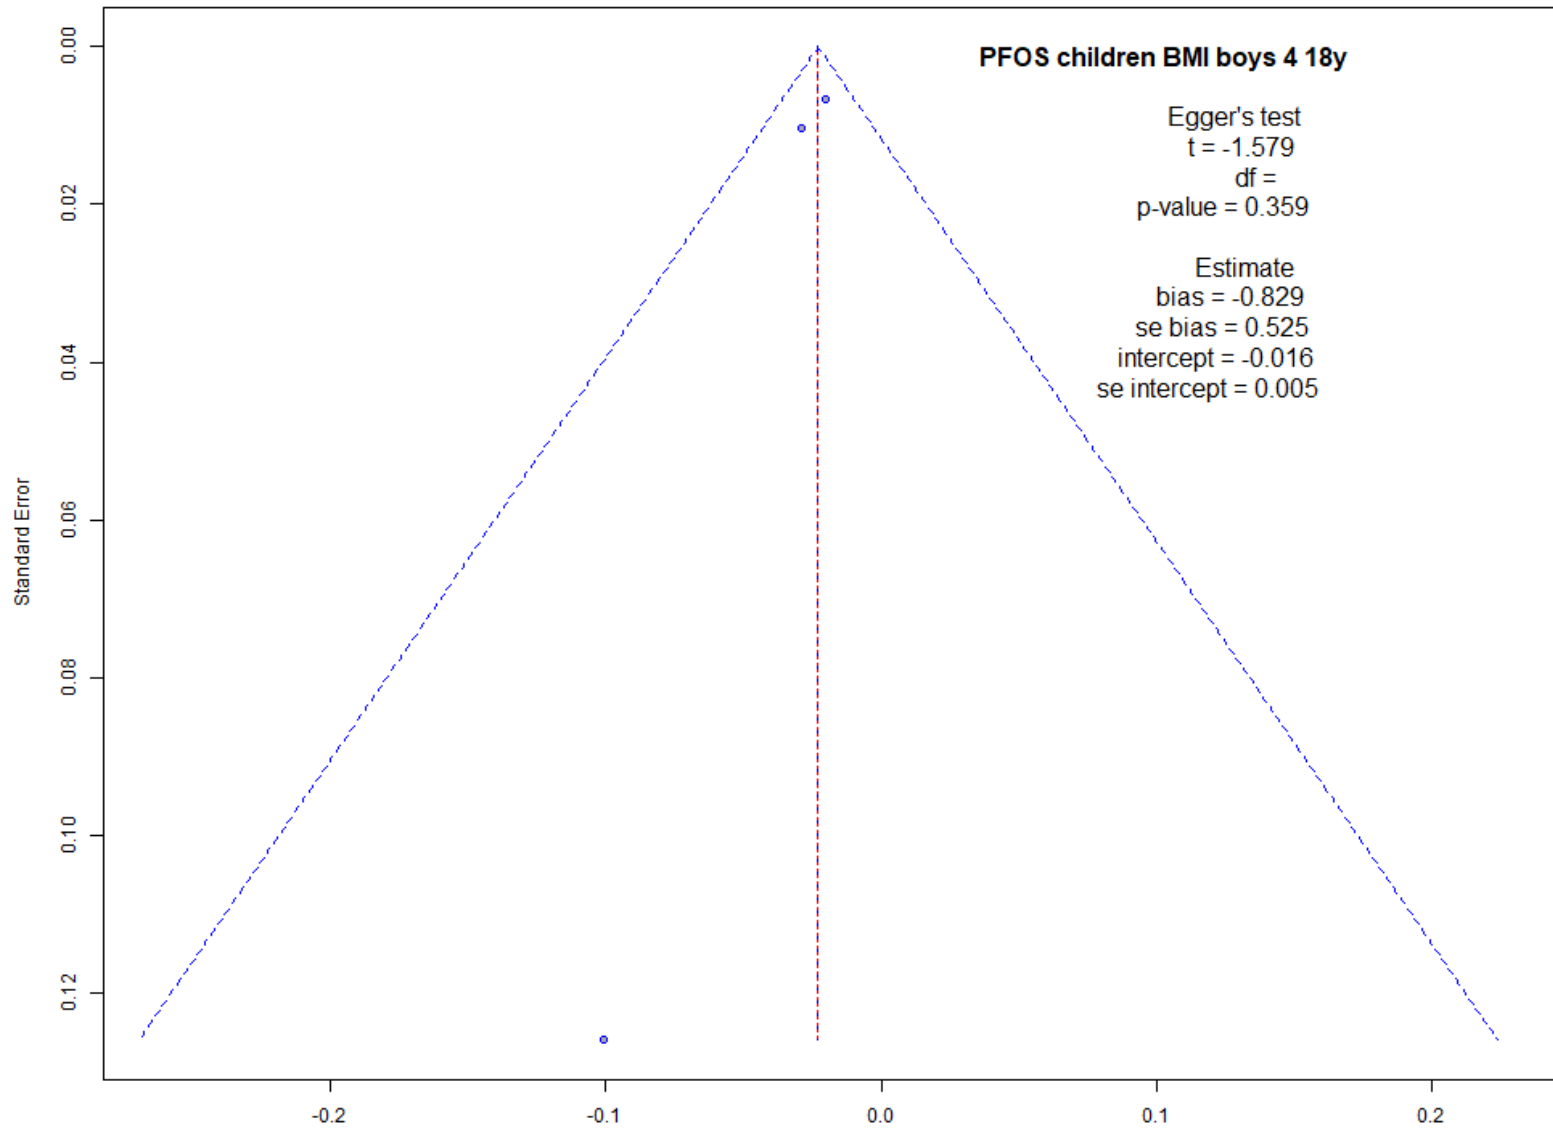

**Prenatal and childhood exposure to per-/polyfluoroalkyl substances (PFASs) and its associations with childhood overweight and/or obesity: a systematic review with meta-analyses**

Gianfranco Frigerio, Chiara Matilde Ferrari, and Silvia Fustinoni

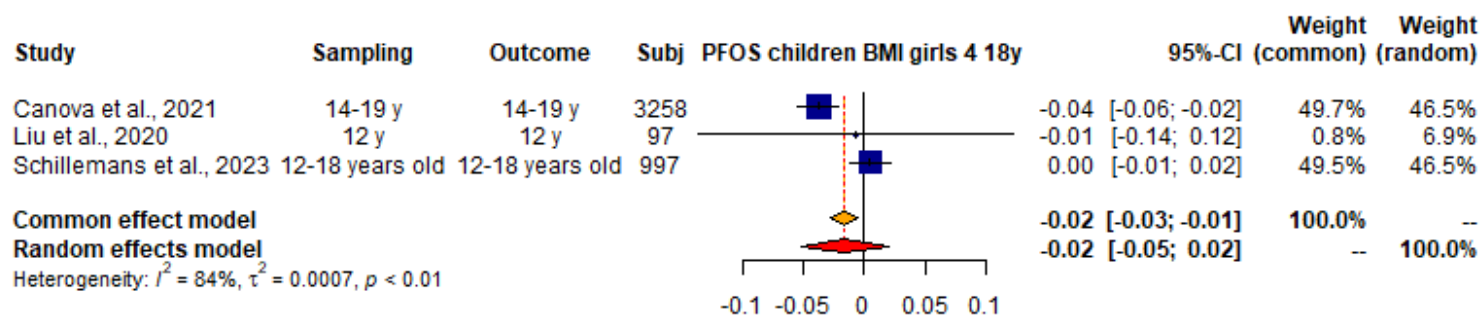

# Prenatal and childhood exposure to per-/polyfluoroalkyl substances (PFASs) and its associations with childhood overweight and/or obesity: a systematic review with meta-analyses

Gianfranco Frigerio, Chiara Matilde Ferrari, and Silvia Fustinoni

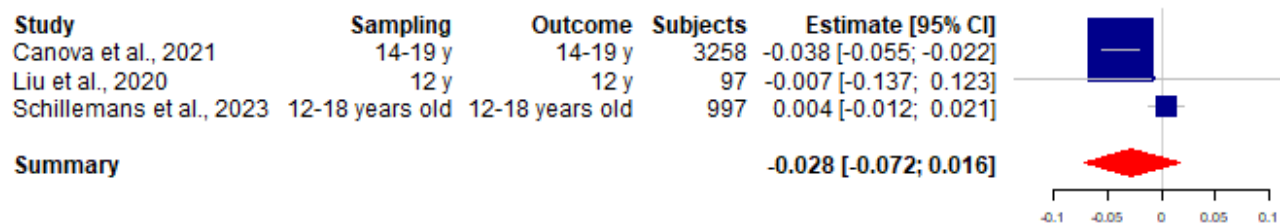

Prenatal and childhood exposure to per-/polyfluoroalkyl substances (PFASs) and its associations with childhood overweight and/or obesity: a systematic review with meta-analyses

Gianfranco Frigerio, Chiara Matilde Ferrari, and Silvia Fustinoni

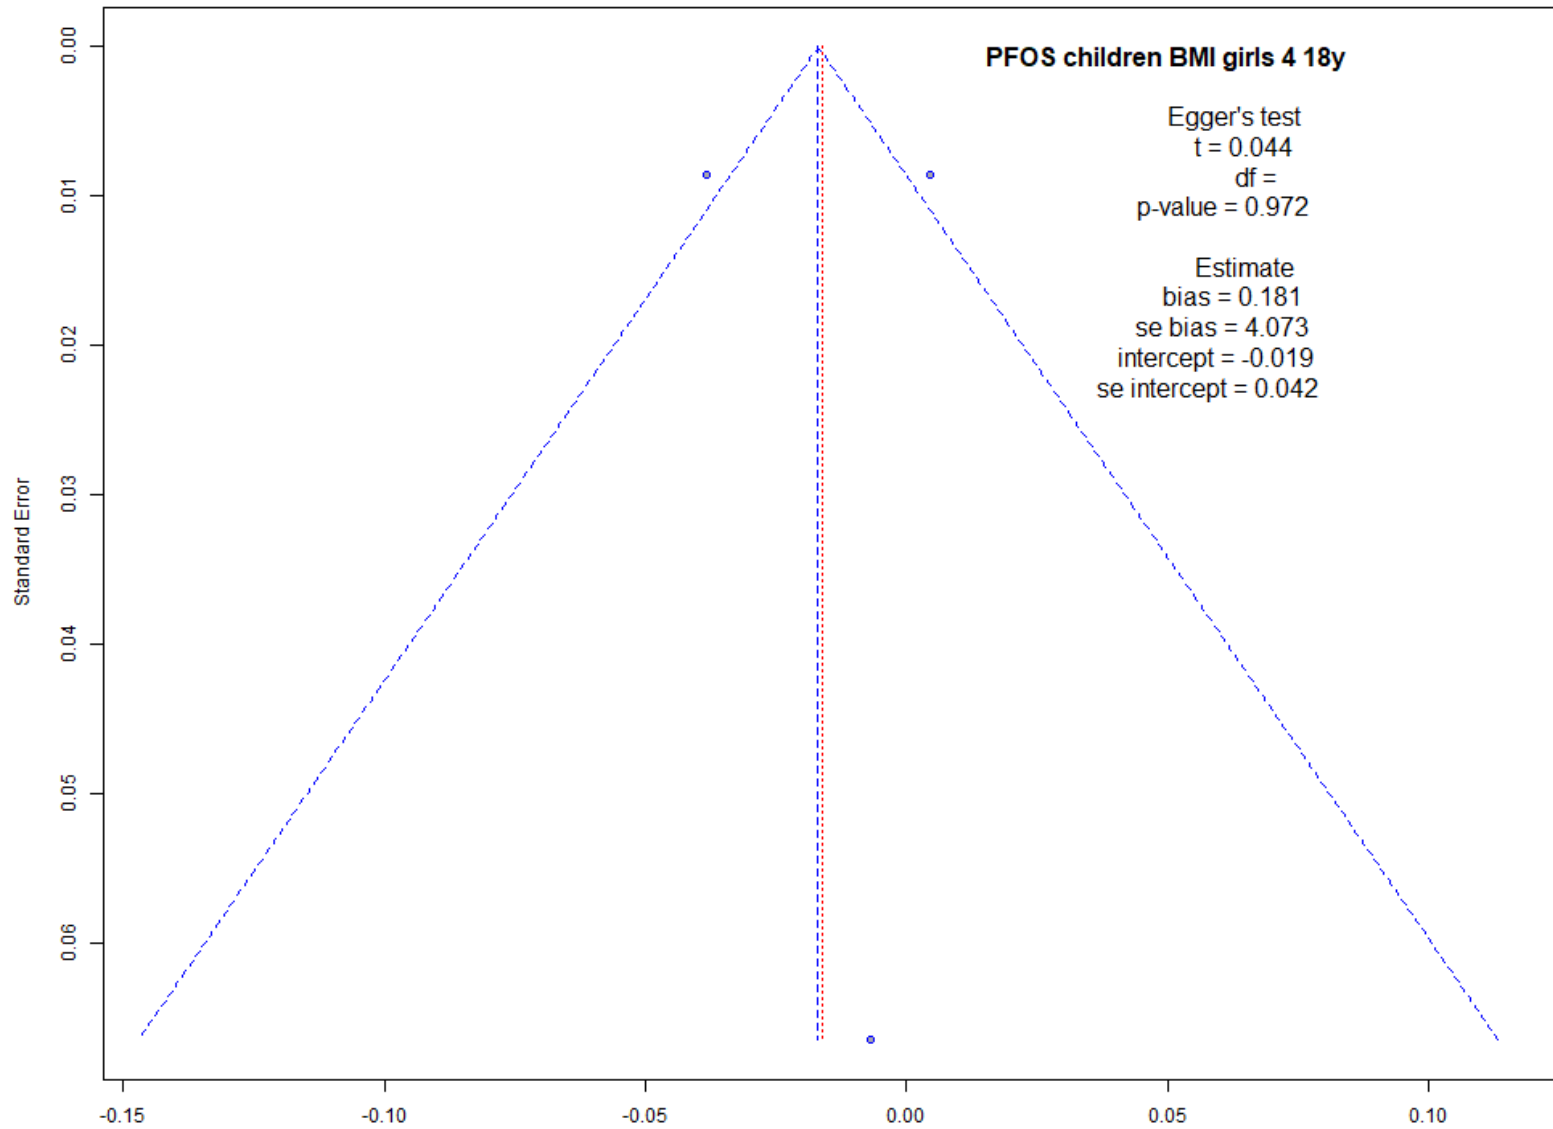

**Prenatal and childhood exposure to per-/polyfluoroalkyl substances (PFASs) and its associations with childhood overweight and/or obesity: a systematic review with meta-analyses**

Gianfranco Frigerio, Chiara Matilde Ferrari, and Silvia Fustinoni

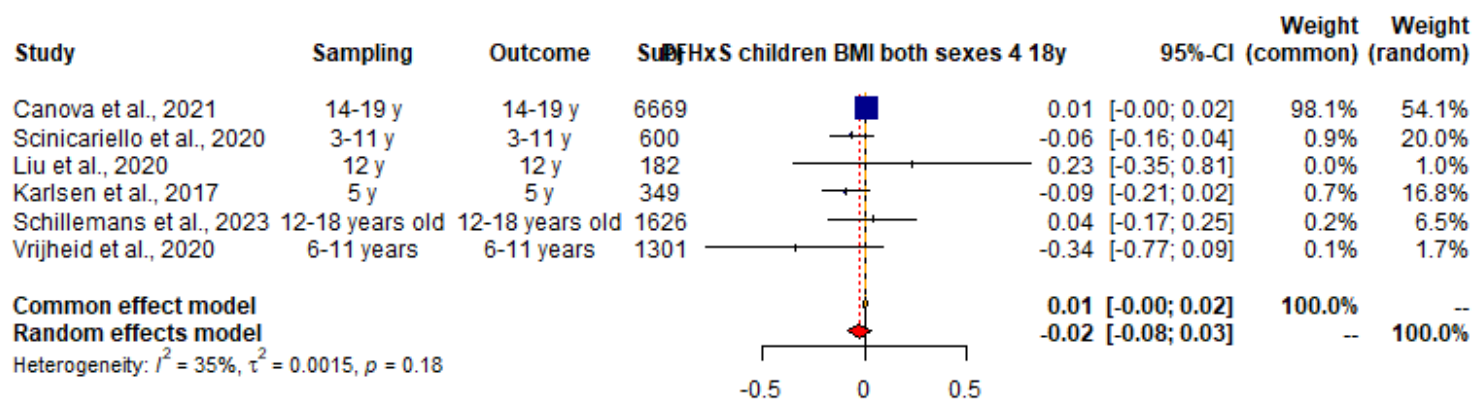

**Prenatal and childhood exposure to per-/polyfluoroalkyl substances (PFASs) and its associations with childhood overweight and/or obesity: a systematic review with meta-analyses**

Gianfranco Frigerio, Chiara Matilde Ferrari, and Silvia Fustinoni



Prenatal and childhood exposure to per-/polyfluoroalkyl substances (PFASs) and its associations with childhood overweight and/or obesity: a systematic review with meta-analyses

Gianfranco Frigerio, Chiara Matilde Ferrari, and Silvia Fustinoni

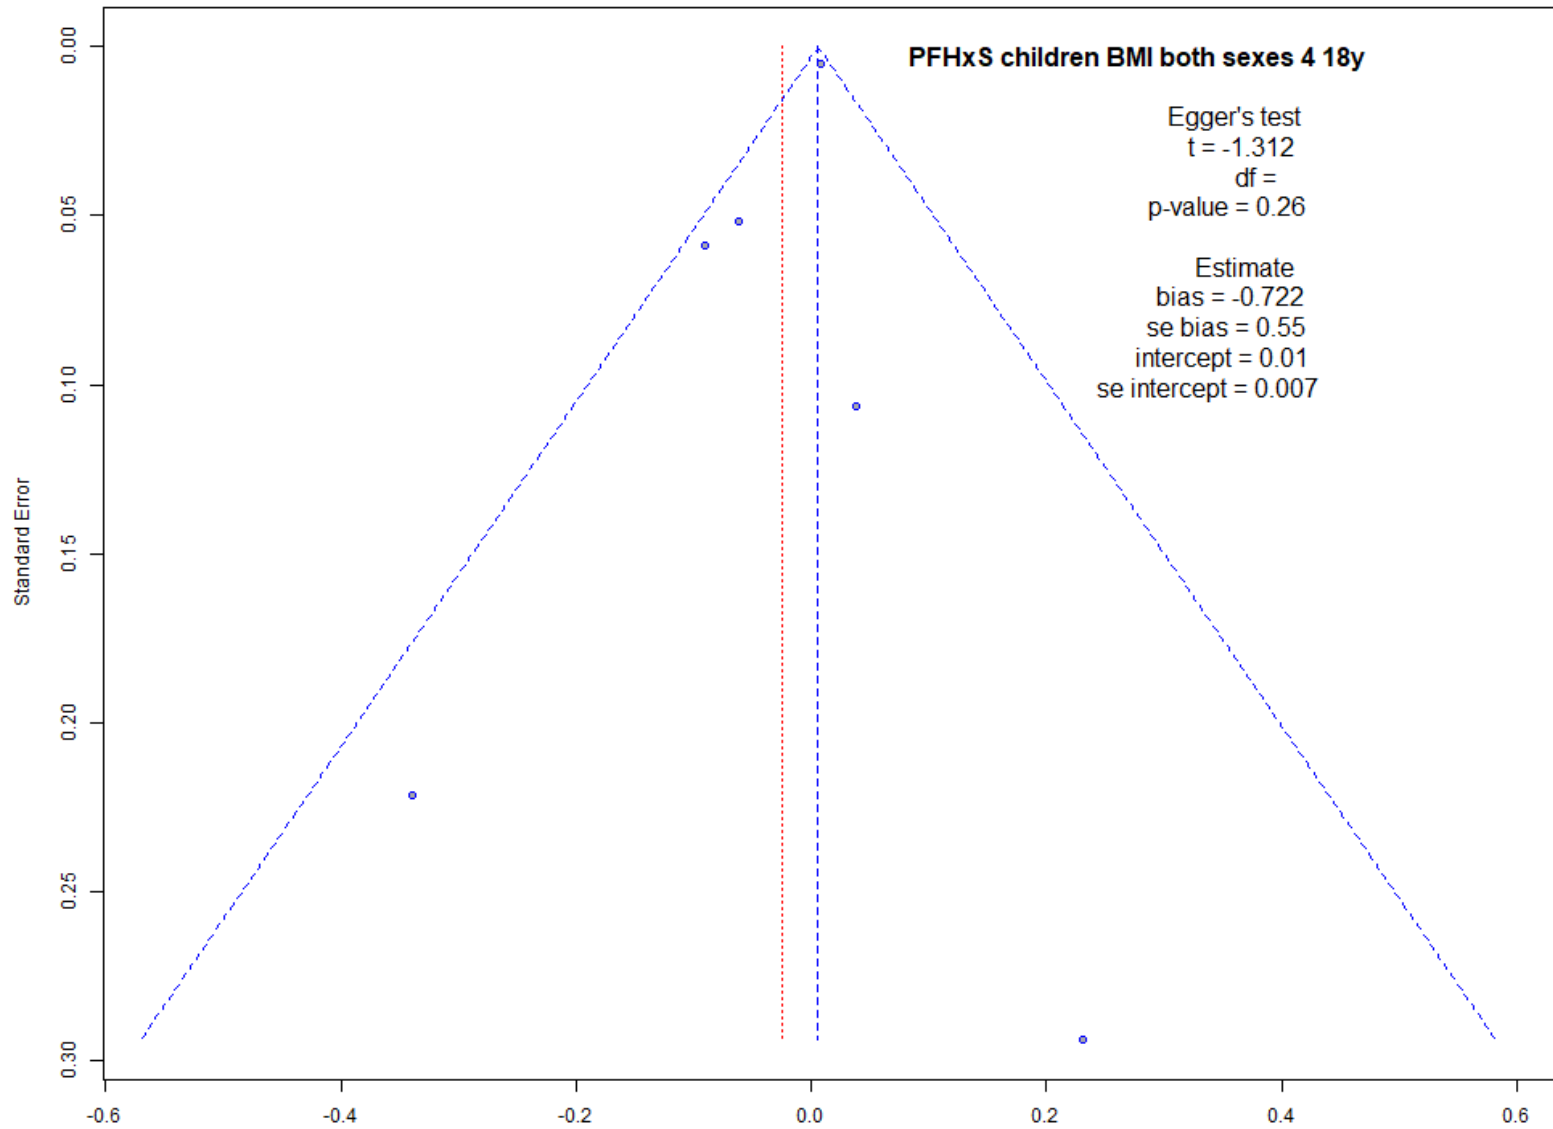



**Prenatal and childhood exposure to per-/polyfluoroalkyl substances (PFASs) and its associations with childhood overweight and/or obesity: a systematic review with meta-analyses**

Gianfranco Frigerio, Chiara Matilde Ferrari, and Silvia Fustinoni

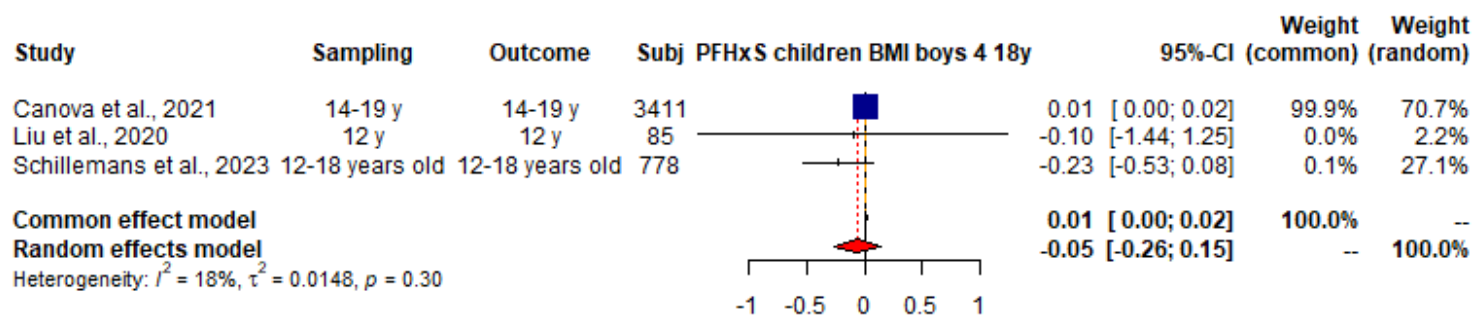

# Prenatal and childhood exposure to per-/polyfluoroalkyl substances (PFASs) and its associations with childhood overweight and/or obesity: a systematic review with meta-analyses

Gianfranco Frigerio, Chiara Matilde Ferrari, and Silvia Fustinoni

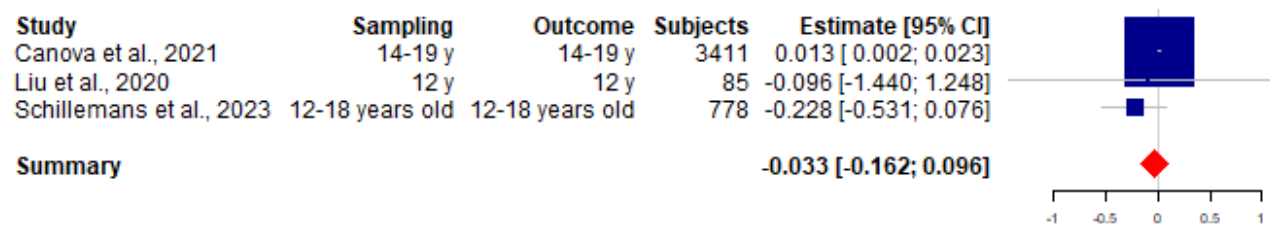

Prenatal and childhood exposure to per-/polyfluoroalkyl substances (PFASs) and its associations with childhood overweight and/or obesity: a systematic review with meta-analyses

Gianfranco Frigerio, Chiara Matilde Ferrari, and Silvia Fustinoni

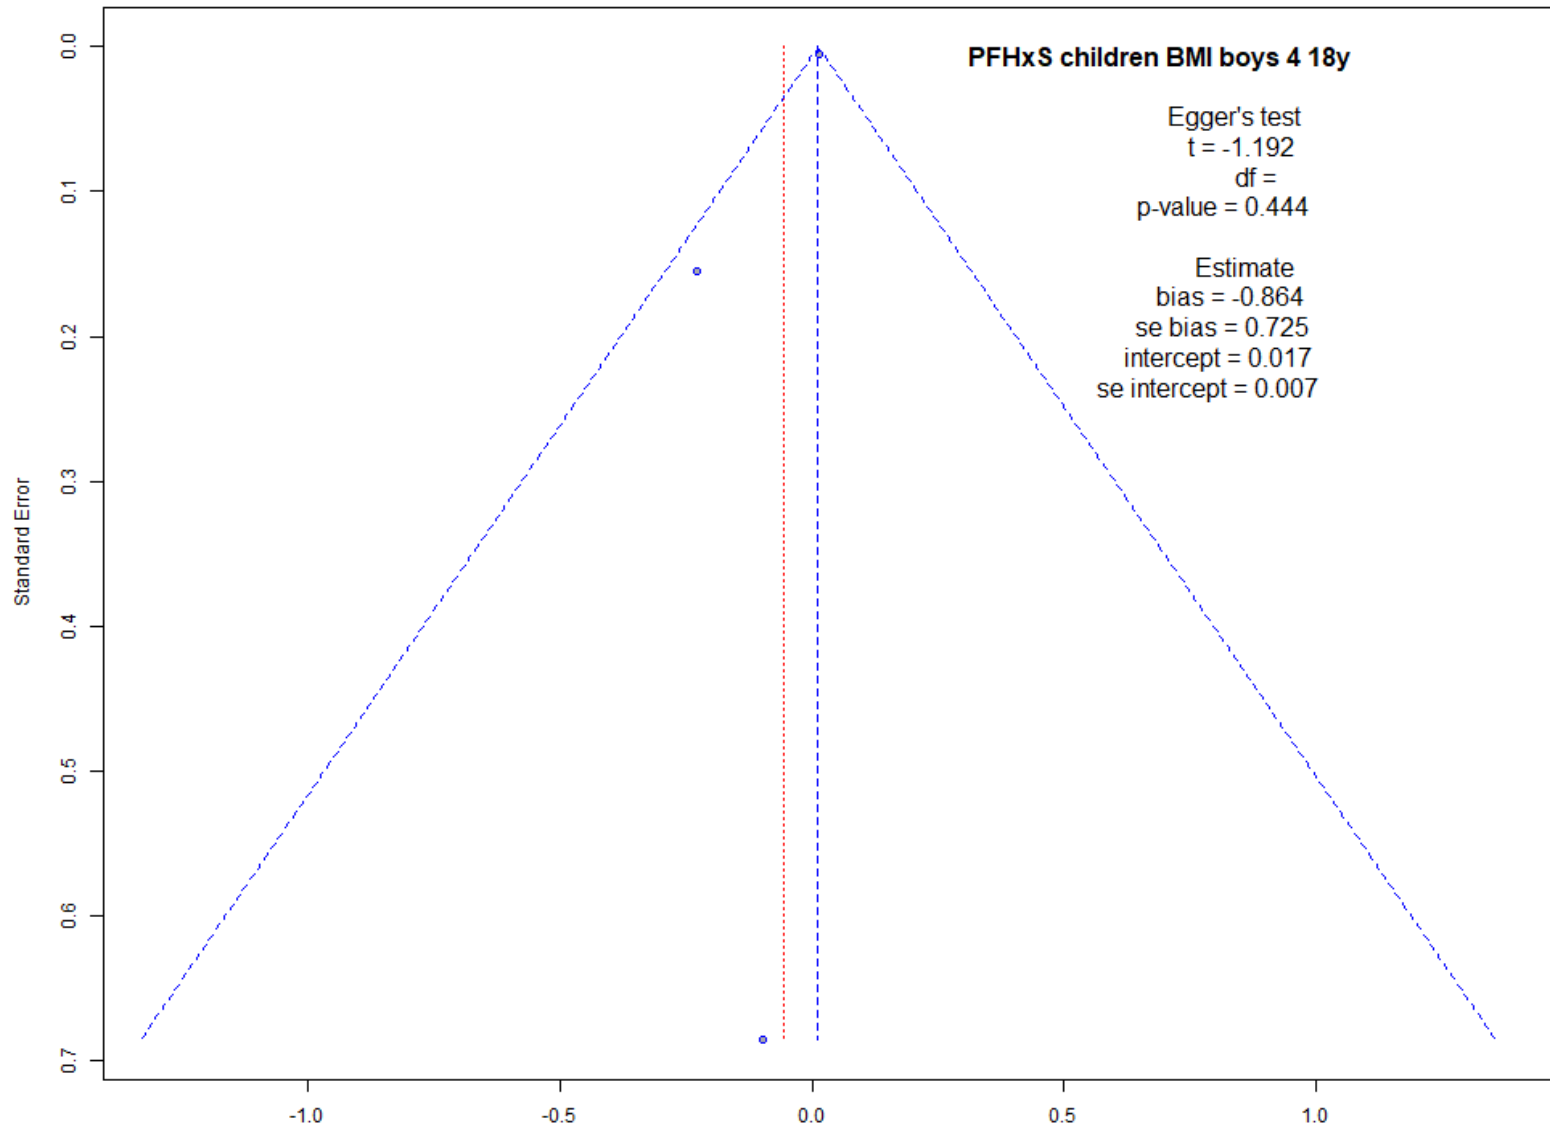

**Prenatal and childhood exposure to per-/polyfluoroalkyl substances (PFASs) and its associations with childhood overweight and/or obesity: a systematic review with meta-analyses**

Gianfranco Frigerio, Chiara Matilde Ferrari, and Silvia Fustinoni

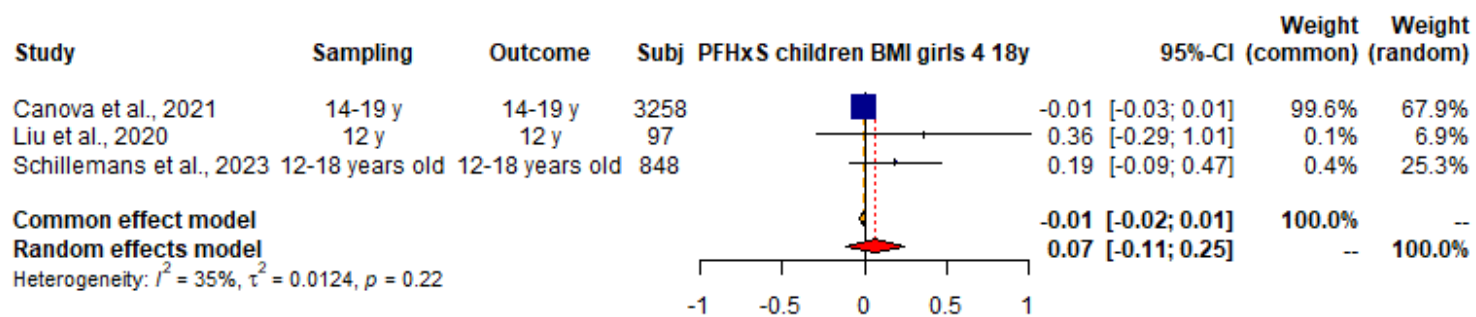

# Prenatal and childhood exposure to per-/polyfluoroalkyl substances (PFASs) and its associations with childhood overweight and/or obesity: a systematic review with meta-analyses

Gianfranco Frigerio, Chiara Matilde Ferrari, and Silvia Fustinoni



Prenatal and childhood exposure to per-/polyfluoroalkyl substances (PFASs) and its associations with childhood overweight and/or obesity: a systematic review with meta-analyses

Gianfranco Frigerio, Chiara Matilde Ferrari, and Silvia Fustinoni

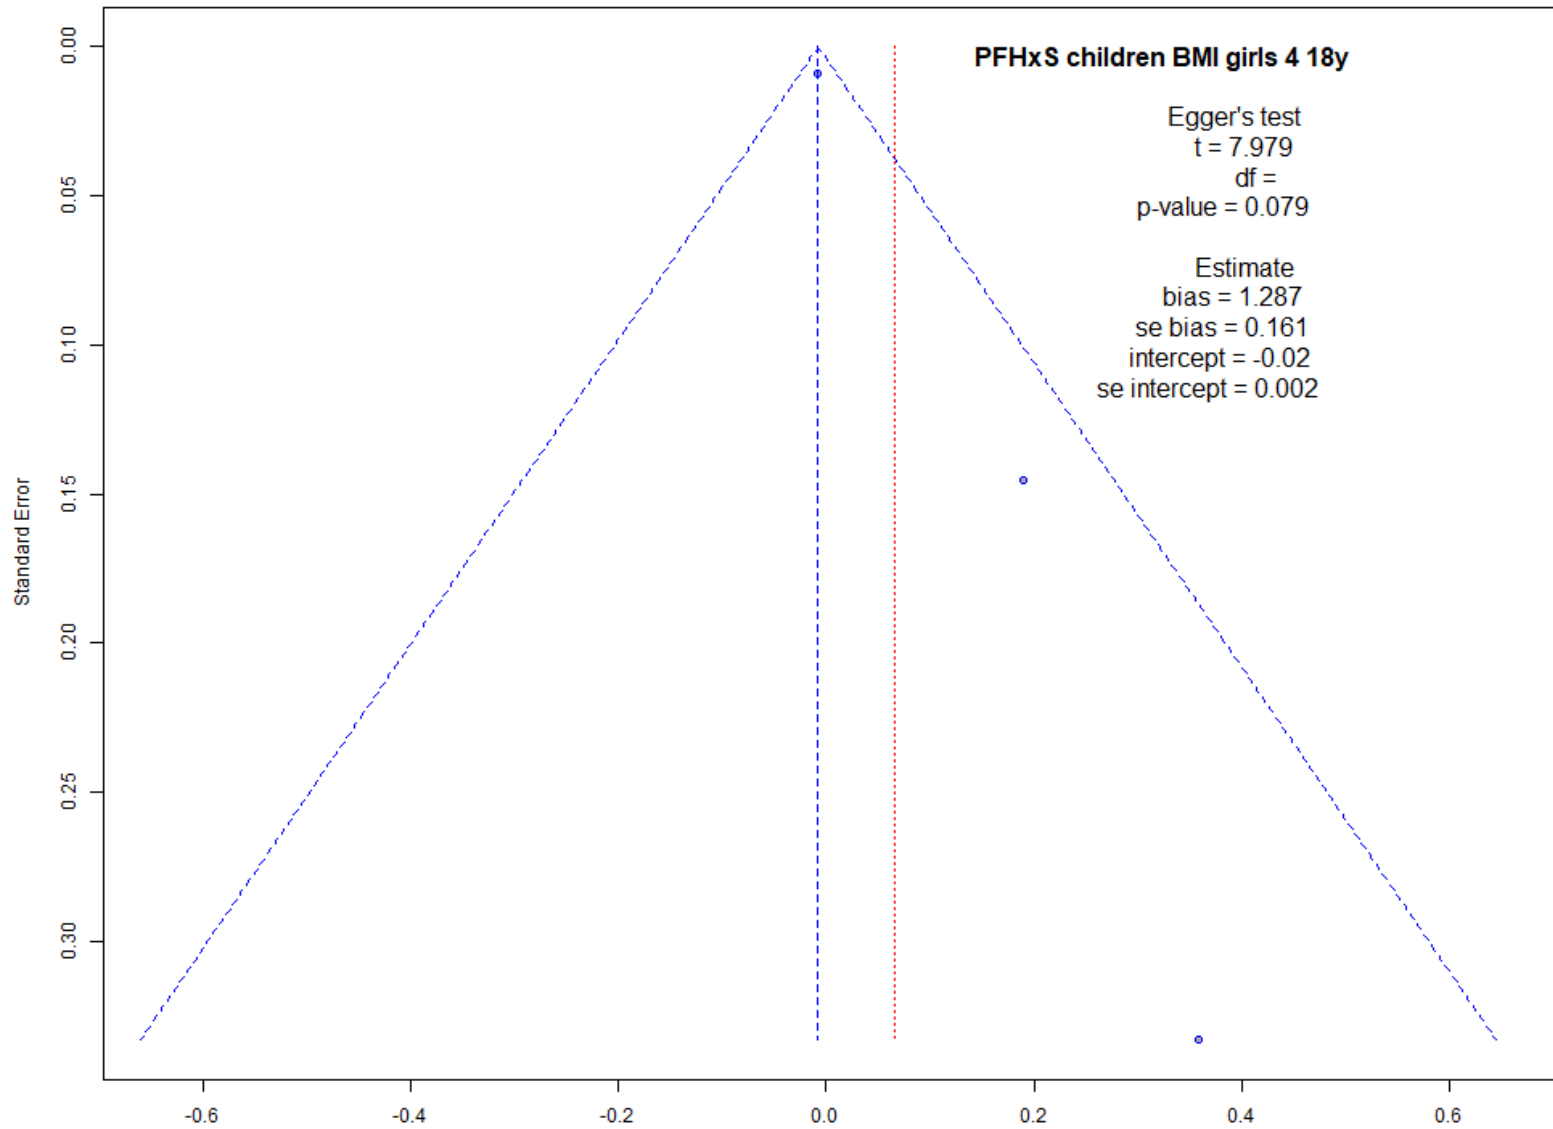

Prenatal and childhood exposure to per-/polyfluoroalkyl substances (PFASs) and its associations with childhood overweight and/or obesity: a systematic review with meta-analyses

Gianfranco Frigerio, Chiara Matilde Ferrari, and Silvia Fustinoni

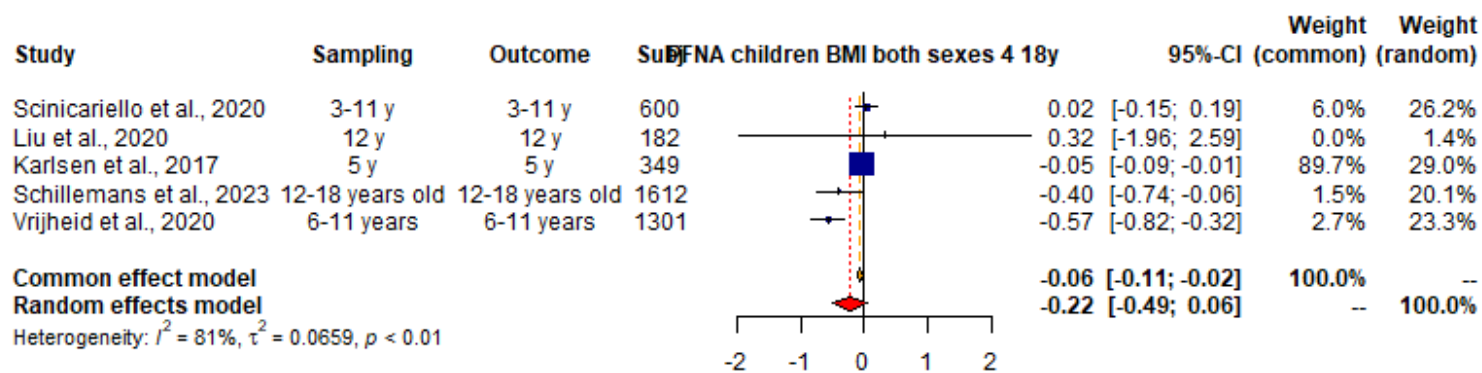

**Prenatal and childhood exposure to per-/polyfluoroalkyl substances (PFASs) and its associations with childhood overweight and/or obesity: a systematic review with meta-analyses**

Gianfranco Frigerio, Chiara Matilde Ferrari, and Silvia Fustinoni

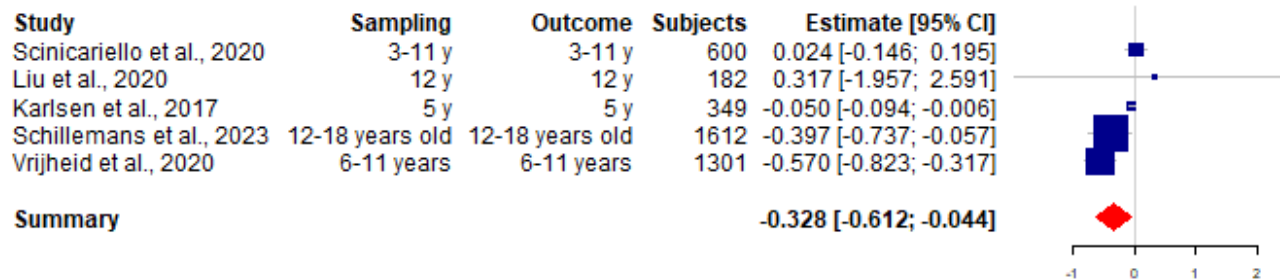



Prenatal and childhood exposure to per-/polyfluoroalkyl substances (PFASs) and its associations with childhood overweight and/or obesity: a systematic review with meta-analyses

Gianfranco Frigerio, Chiara Matilde Ferrari, and Silvia Fustinoni

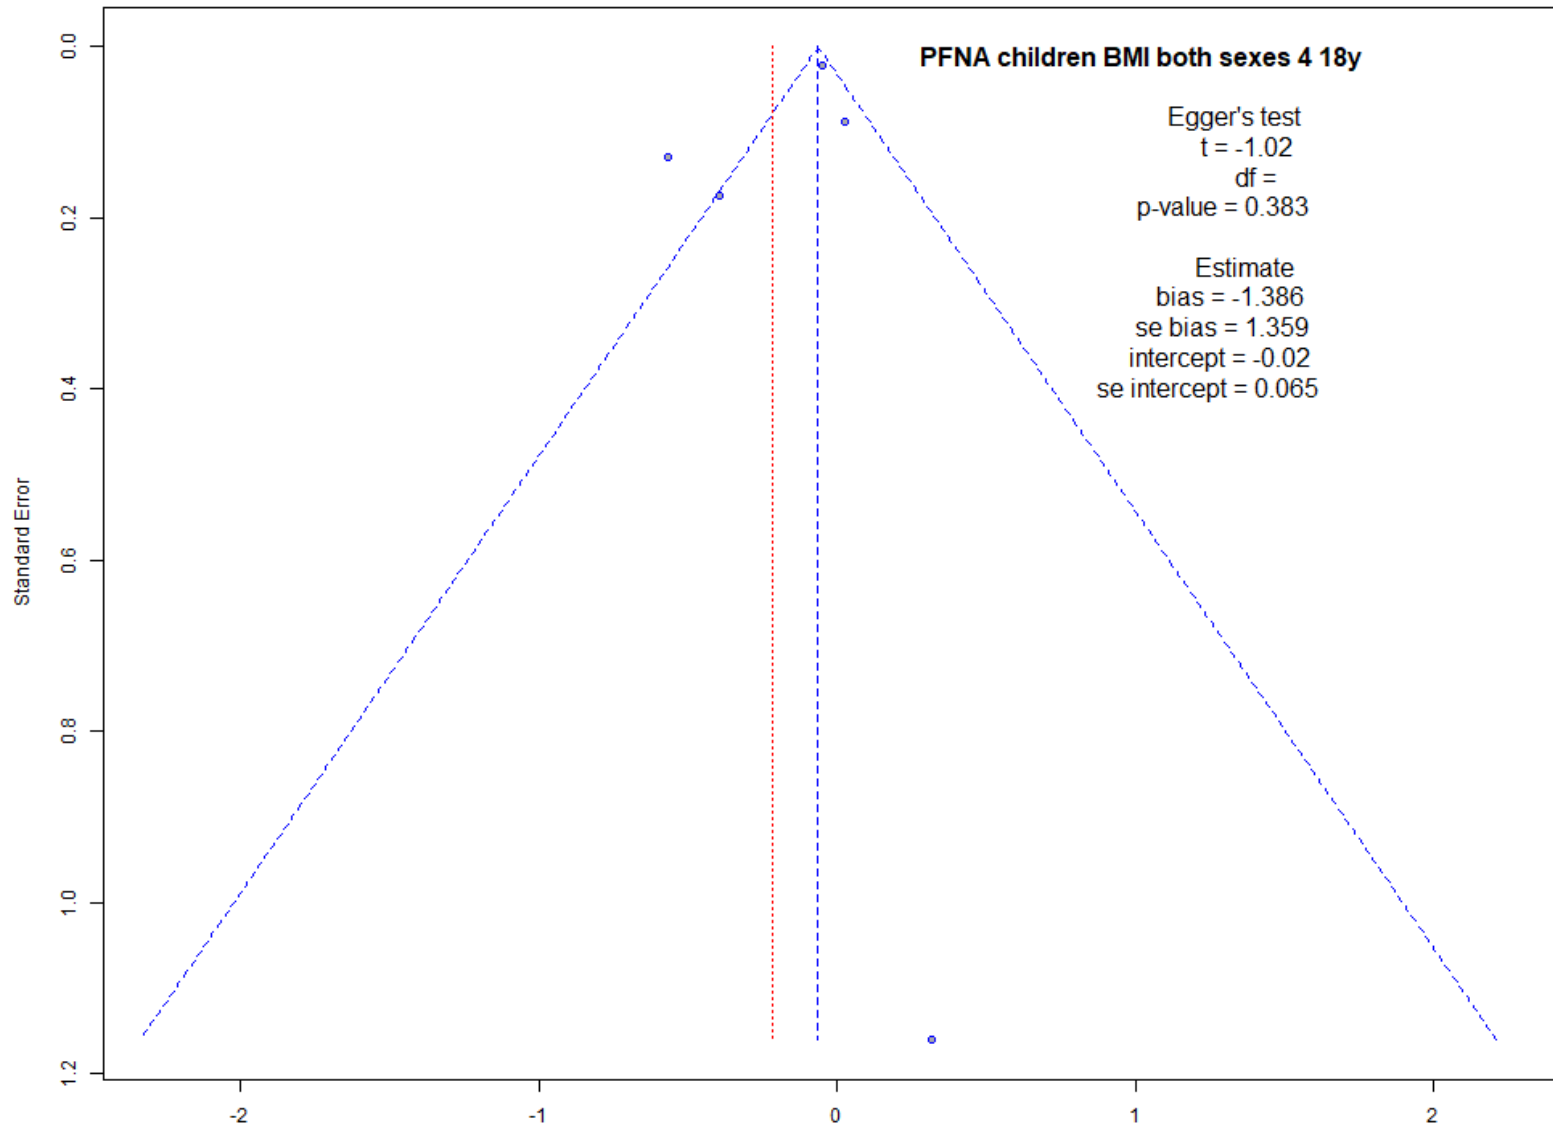

**Prenatal and childhood exposure to per-/polyfluoroalkyl substances (PFASs) and its associations with childhood overweight and/or obesity: a systematic review with meta-analyses**

Gianfranco Frigerio, Chiara Matilde Ferrari, and Silvia Fustinoni

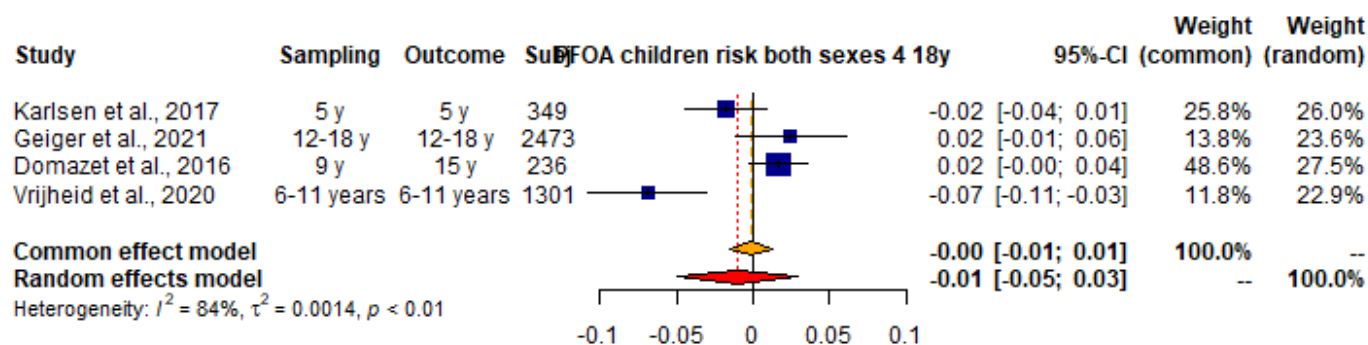

**Prenatal and childhood exposure to per-/polyfluoroalkyl substances (PFASs) and its associations with childhood overweight and/or obesity: a systematic review with meta-analyses**

Gianfranco Frigerio, Chiara Matilde Ferrari, and Silvia Fustinoni

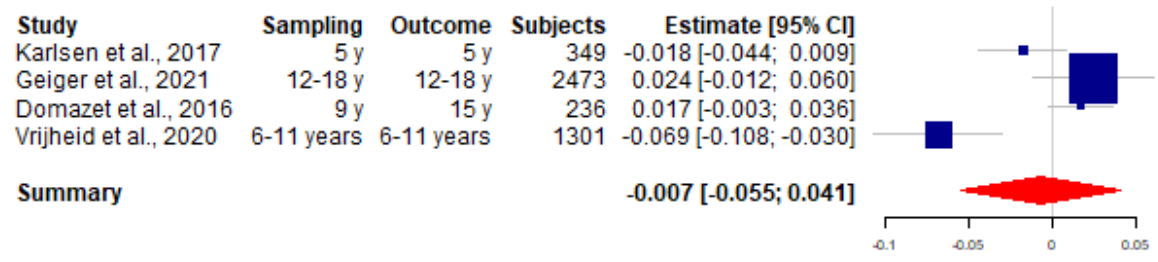

Prenatal and childhood exposure to per-/polyfluoroalkyl substances (PFASs) and its associations with childhood overweight and/or obesity: a systematic review with meta-analyses

Gianfranco Frigerio, Chiara Matilde Ferrari, and Silvia Fustinoni

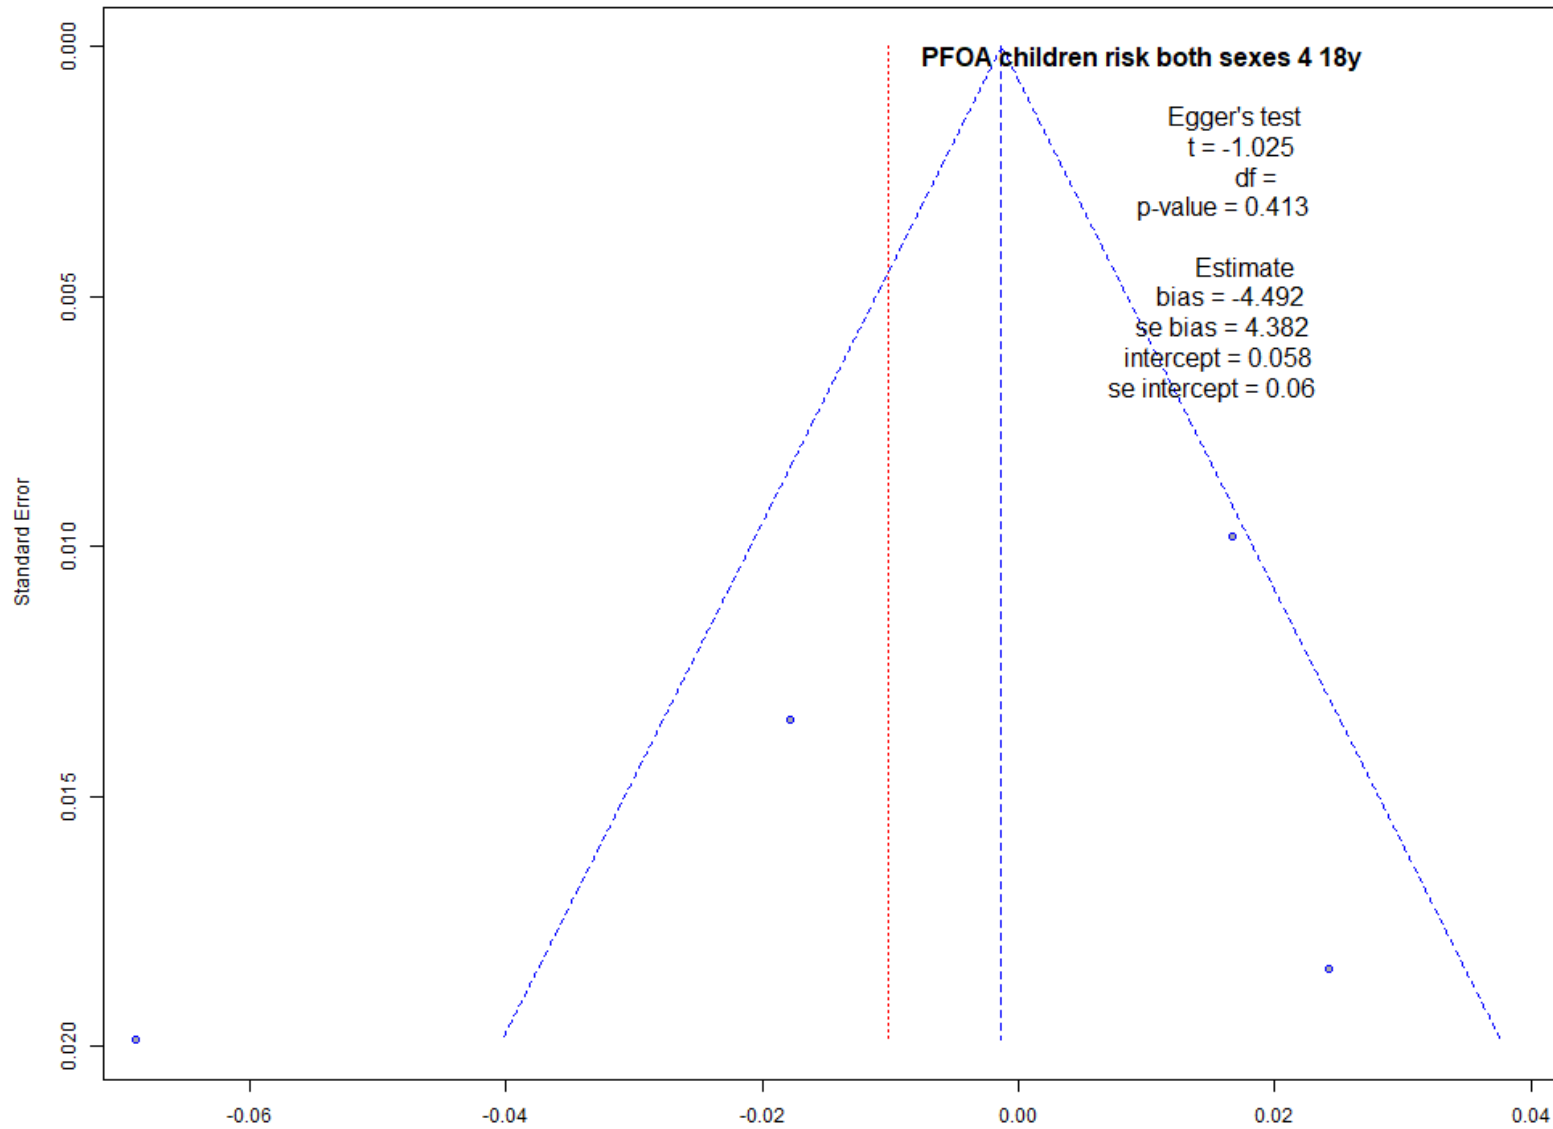

**Prenatal and childhood exposure to per-/polyfluoroalkyl substances (PFASs) and its associations with childhood overweight and/or obesity: a systematic review with meta-analyses**

Gianfranco Frigerio, Chiara Matilde Ferrari, and Silvia Fustinoni

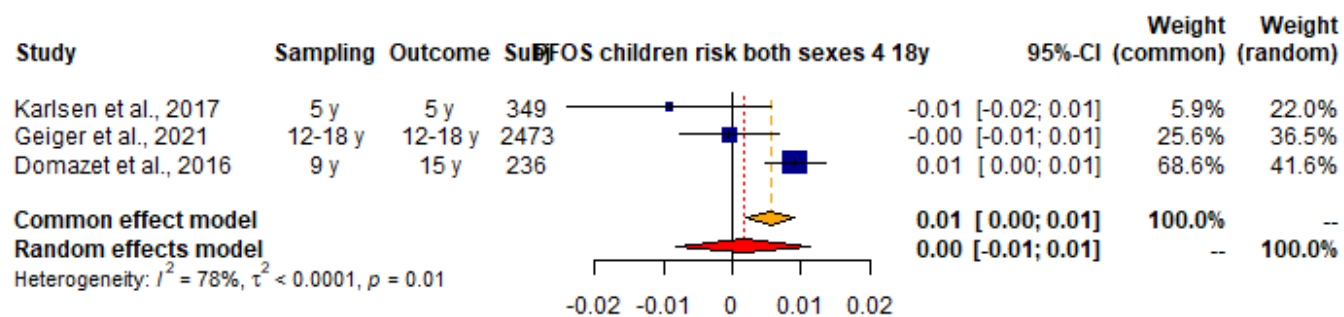

# Prenatal and childhood exposure to per-/polyfluoroalkyl substances (PFASs) and its associations with childhood overweight and/or obesity: a systematic review with meta-analyses

Gianfranco Frigerio, Chiara Matilde Ferrari, and Silvia Fustinoni



Prenatal and childhood exposure to per-/polyfluoroalkyl substances (PFASs) and its associations with childhood overweight and/or obesity: a systematic review with meta-analyses

Gianfranco Frigerio, Chiara Matilde Ferrari, and Silvia Fustinoni

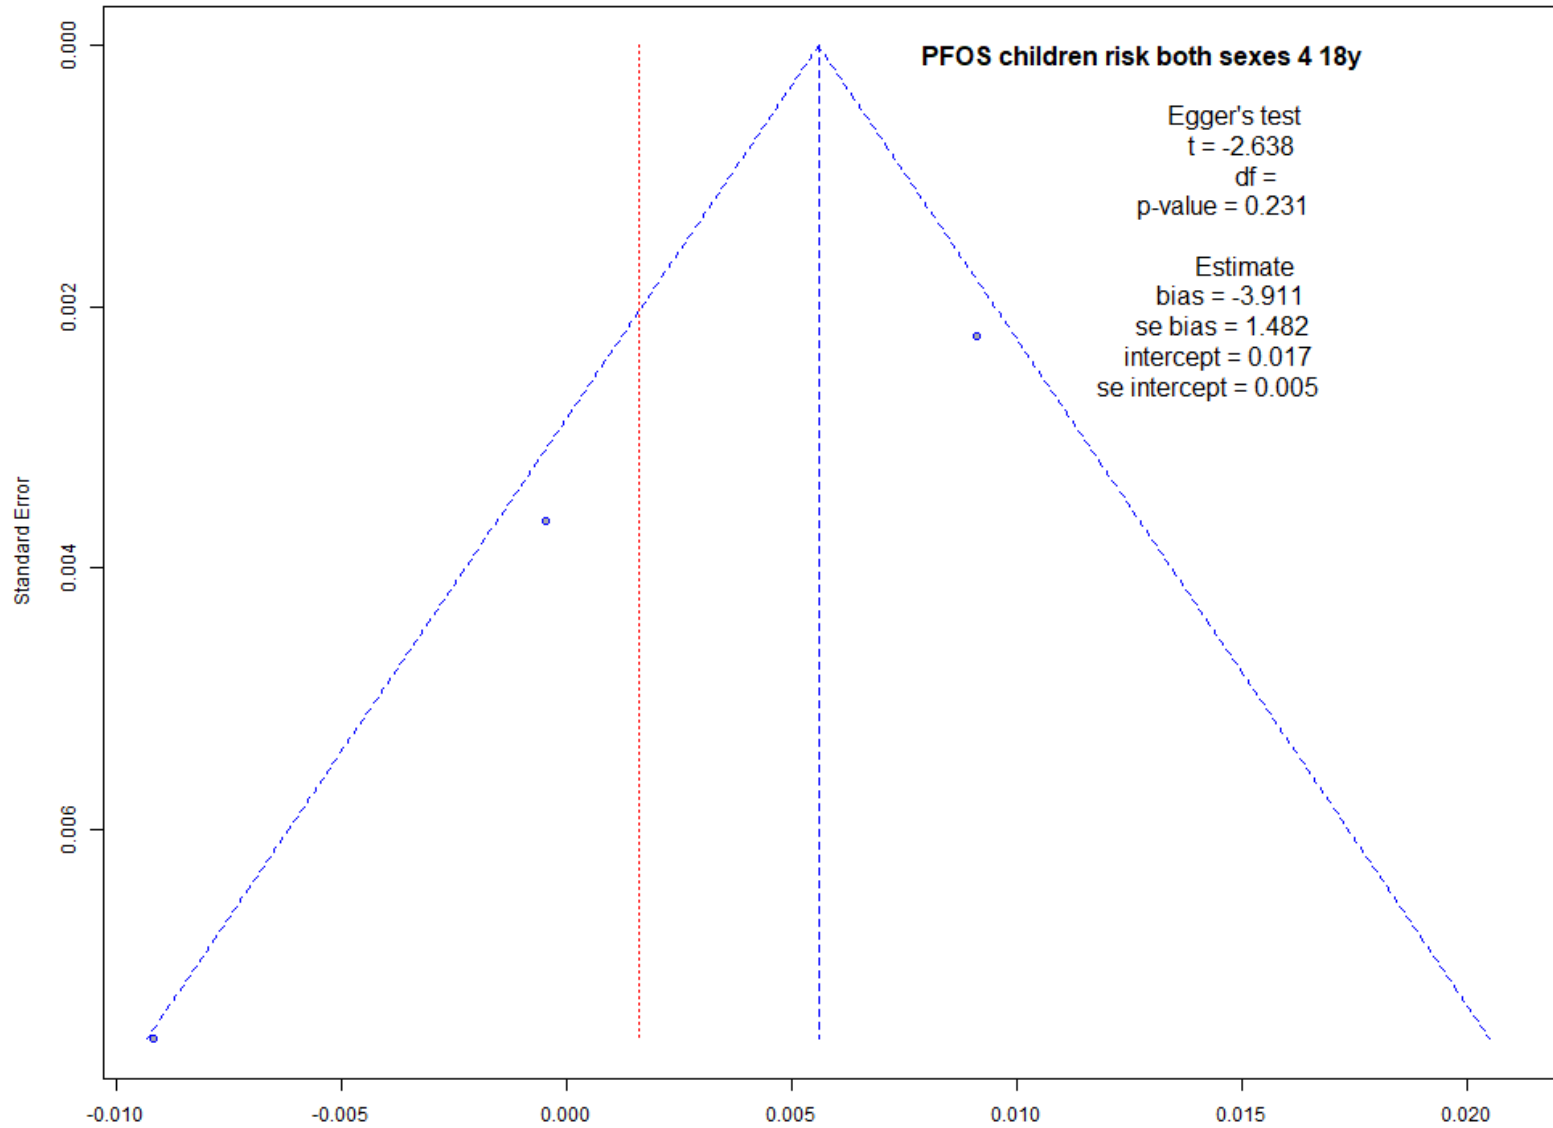

Supplement: 12940_2023_1006_MOESM2_ESM.pdf [file 12940_2023_1006_MOESM2_ESM.pdf]
