# Supplementary material for: Prenatal and childhood exposure to per-/polyfluoroalkyl substances (PFASs) and its associations with childhood overweight and/or obesity: a systematic review with meta-analyses
Source: Environ Health. 2023 Aug 14;22:56. doi: 10.1186/s12940-023-01006-6 (PMC10424367; doi:10.1186/s12940-023-01006-6)
Supplement: Supplementary file 5 — Additional file 5: Supplementary Table S03. Complete database of the considered studies, including: information retrieved from PubMed and Embase; whether the study was included or not in the systematic review and the category of inclusion or rejection; information collected from included articles; and score of reporting assigned to included articles [file 12940_2023_1006_MOESM5_ESM.xlsx]

## Sheet: 2023-04-21_rev_PM_Em_studies_nu
Prenatal and childhood exposure to per-/polyfluoroalkyl substances (PFASs) and its associations with childhood overweight and/or obesity: a systematic review with meta-analyses
Gianfranco Frigerio, Chiara Matilde Ferrari, and Silvia Fustinoni
Table S03 - Complete database of the considered studies. Column A: a unique code assigned to each article; columns B-N: a code and information retrieved from PubMed; columns O-BM: a code and information retrieved from Embase; column BN: whether the study was included or not in the systematic review and the category of inclusion or rejection; column AR-BC: information collected from included artic…
Code	PM_code	PM_PMID	PM_Title	PM_Authors	PM_Citation	PM_First Author	PM_Journal/Book	PM_Publication Year	PM_Create Date	PM_PMCID	PM_NIHMS ID	PM_DOI	PM_pres_in_Em_tot_DOI	Em_code	Em_Title	Em_Original Title	Em_Author Names	Em_Author Addresses	Em_Correspondence Address	Em_Editors	Em_AiP/IP Entry Date	Em_Full Record Entry Date	Em_Source	Em_Source title	Em_Publication Year	Em_Volume	Em_Issue	Em_First Page	Em_Last Page	Em_Date of Publication	Em_Publication Type	Em_Conference Name	Em_Conference Location	Em_Conference Date	Em_Conference Editors	Em_ISSN	Em_ISBN	Em_Book Publisher	Em_Abstract	Em_Original Abstract	Em_Author Keywords	Em_Emtree Drug Index Terms (Major Focus)	Em_Emtree Drug Index Terms	Em_Emtree Medical Index Terms (Major Focus)	Em_Emtree Medical Index Terms	Em_Drug Tradenames	Em_Drug Manufacturer	Em_Device Tradenames	Em_Device Manufacturer
n001	nPM001	32707118	Endocrine-disrupting chemicals: implications for human health	Kahn LG, Philippat C, Nakayama SF, Slama R, Trasande L.	Lancet Diabetes Endocrinol. 2020 Aug;8(8):703-718. doi: 10.1016/S2213-8587(20)30129-7.	Kahn LG	Lancet Diabetes Endocrinol	2020	2020-07-25	PMC7437820	NIHMS1618640	10.1016/s2213-8587(20)30129-7	TRUE	nEm196	Endocrine-disrupting chemicals: implications for human health	NA	Kahn L.G., Philippat C., Nakayama S.F., Slama R., Trasande L.	(Kahn L.G.; Trasande L., leonardo.trasande@nyulangone.org) Department of Pediatrics, New York University, New York, NY, United States. , (Trasande L., leonardo.trasande@nyulangone.org) Department of Environmental Medicine, Department of Population Health, New York University Grossman School of Medicine and New York University School of Global Public Health, New York University, New York, NY, Unit…	L. Trasande, Department of Pediatrics, New York University Grossman School of Medicine, New York University, New York, NY, United States. Email: leonardo.trasande@nyulangone.org	NA	2020-07-28	2020-08-04	The Lancet Diabetes and Endocrinology (2020) 8:8 (703-718). Date of Publication: 1 Aug 2020	The Lancet Diabetes and Endocrinology	2020	8	8	703	718	2020-08-01	Review	NA	NA	NA	NA	2213-8595 (electronic),2213-8587	NA	Lancet Publishing Group, cususerv@lancet.com	Since reports published in 2015 and 2016 identified 15 probable exposureâ€“outcome associations, there has been an increase in studies in humans of exposure to endocrine-disrupting chemicals (EDCs) and a deepened understanding of their effects on human health. In this Series paper, we have reviewed subsequent additions to the literature and identified new exposureâ€“outcome associations with subs…	NA	NA	endocrine disruptor (drug toxicity)	4,4' isopropylidenediphenol (drug toxicity), bisphenol derivative (drug toxicity), flame retardant (drug toxicity), organofluorine derivative (drug toxicity), organophosphate pesticide (drug toxicity), perfluoroalkyl derivative (drug toxicity), phenol derivative (drug toxicity), phthalic acid derivative (drug toxicity), unclassified drug	health hazard	adult, anogenital distance, attention deficit hyperactivity disorder (etiology), birth weight, breast cancer (etiology), child, childhood obesity (etiology), clinical outcome, cognitive defect (etiology), disease association, endometriosis (etiology), evidence based medicine, exposure, female, gender, glucose tolerance, human, male, obesity (etiology), occupational exposure, ovary polycystic dise…	NA	NA	NA	NA
n002	nPM002	27857130	Early-life exposure to EDCs: role in childhood obesity and neurodevelopment	Braun JM.	Nat Rev Endocrinol. 2017 Mar;13(3):161-173. doi: 10.1038/nrendo.2016.186. Epub 2016 Nov 18.	Braun JM	Nat Rev Endocrinol	2017	2016-11-19	PMC5322271	NIHMS850372	10.1038/nrendo.2016.186	TRUE	nEm397	Early-life exposure to EDCs: Role in childhood obesity and neurodevelopment	NA	Braun J.M.	(Braun J.M., joseph_braun_1@brown.edu) Department of Epidemiology, Brown University, Box G-S121(2), Providence, RI, United States.	J.M. Braun, Department of Epidemiology, Brown University, Box G-S121(2), Providence, RI, United States. Email: joseph_braun_1@brown.edu	NA	2016-11-28	2017-03-14	Nature Reviews Endocrinology (2017) 13:3 (161-173). Date of Publication: 1 Mar 2017	Nature Reviews Endocrinology	2017	13	3	161	173	2017-03-01	Review	NA	NA	NA	NA	1759-5037 (electronic),1759-5029	NA	Nature Publishing Group, Houndmills, Basingstoke, Hampshire, United Kingdom.	Endocrine-disrupting chemicals (EDCs) might increase the risk of childhood diseases by disrupting hormone-mediated processes that are critical for growth and development during gestation, infancy and childhood. The fetus, infant and child might have enhanced sensitivity to environmental stressors such as EDCs due to their rapid development and increased exposure to some EDCs as a consequence of d…	NA	NA	endocrine disruptor (drug toxicity)	4,4' isopropylidenediphenol (drug toxicity), fluorocarbon (drug toxicity), perfluoroalkyl derivative (drug toxicity), phthalic acid derivative (drug toxicity), triclosan (drug toxicity), unclassified drug	childhood obesity (epidemiology, etiology), early life exposure, exposure, nerve cell differentiation	behavior disorder (epidemiology, etiology), child, child health, childhood disease (epidemiology, etiology), disease association, fetus, human, infant, nonhuman, prenatal exposure, public health, review, risk assessment, sex difference, vulnerable population	NA	NA	NA	NA
n003	nPM003	23994667	Bisphenol A and human health: a review of the literature	Rochester JR.	Reprod Toxicol. 2013 Dec;42:132-55. doi: 10.1016/j.reprotox.2013.08.008. Epub 2013 Aug 30.	Rochester JR	Reprod Toxicol	2013	2013-09-03	NA	NA	10.1016/j.reprotox.2013.08.008	FALSE	NA	NA	NA	NA	NA	NA	NA	NA	NA	NA	NA	NA	NA	NA	NA	NA	NA	NA	NA	NA	NA	NA	NA	NA	NA	NA	NA	NA	NA	NA	NA	NA	NA	NA	NA	NA
n004	nPM004	33548847	Perfluoroalkyl substances and sex hormones in postmenopausal women: NHANES 2013-2016	Wang Y, Aimuzi R, Nian M, Zhang Y, Luo K, Zhang J.	Environ Int. 2021 Apr;149:106408. doi: 10.1016/j.envint.2021.106408. Epub 2021 Feb 3.	Wang Y	Environ Int	2021	2021-02-06	NA	NA	10.1016/j.envint.2021.106408	TRUE	nEm141	Perfluoroalkyl substances and sex hormones in postmenopausal women: NHANES 2013â€“2016	NA	Wang Y., Aimuzi R., Nian M., Zhang Y., Luo K., Zhang J.	(Wang Y.; Aimuzi R.; Nian M.; Zhang Y.; Luo K., luokaixh@126.com; Zhang J., junjimzhang@sina.com) Ministry of Education-Shanghai Key Laboratory of Children's Environmental Health, Xinhua Hospital, Shanghai Jiao-Tong University School of Medicine, Shanghai, China. , (Aimuzi R.; Nian M.; Zhang Y.; Luo K., luokaixh@126.com; Zhang J., junjimzhang@sina.com) School of Public Health, Shanghai Jiao Tong …	K. Luo, Xinhua Hospital, Shanghai Jiao Tong University School of Medicine, 1665 Kongjiang Road, Shanghai, China. Email: luokaixh@126.com	NA	2021-02-12	2021-07-02	Environment International (2021) 149 Article Number: 106408. Date of Publication: 1 Apr 2021	Environment International	2021	149	NA	NA	NA	2021-04-01	Article	NA	NA	NA	NA	1873-6750 (electronic),0160-4120	NA	Elsevier Ltd	Background: Although an alteration in sex hormones has been linked to perfluoroalkyl substances (PFAS) in premenopausal women and girls, whether such associations exist in postmenopausal women remains uncertain. Objects: To examine the associations between serum PFAS concentrations and sex hormone levels in postmenopausal women. Methods: Data from the National Health and Nutrition Examination Sur…	NA	PFAS,Postmenopausal women,Sex hormones,SHBG,Testosterone	alkyl group, organofluorine derivative, perfluoroalkyl substance, sex hormone (endogenous compound)	estradiol (endogenous compound), perfluorodecanoic acid, perfluorohexanesulfonic acid, perfluorononanoic acid, perfluorooctanesulfonic acid, perfluorooctanoic acid, sex hormone binding globulin (endogenous compound), testosterone (endogenous compound), unclassified drug	blood level, postmenopause	adult, article, body mass, cardiometabolic risk, controlled study, cross-sectional study, estradiol blood level, female, health survey, high risk population, human, menopause, obesity, protein blood level, testosterone blood level	NA	NA	NA	NA
n005	nPM005	32812200	Perfluoroalkyl Substances (PFAS) and Their Effects on the Placenta, Pregnancy, and Child Development: a Potential Mechanistic Role for Placental Peroxisome Proliferator-Activated Receptors (PPARs)	Szilagyi JT, Avula V, Fry RC.	Curr Environ Health Rep. 2020 Sep;7(3):222-230. doi: 10.1007/s40572-020-00279-0.	Szilagyi JT	Curr Environ Health Rep	2020	2020-08-20	PMC7473499	NIHMS1621624	10.1007/s40572-020-00279-0	TRUE	nEm194	Perfluoroalkyl Substances (PFAS) and Their Effects on the Placenta, Pregnancy, and Child Development: a Potential Mechanistic Role for Placental Peroxisome Proliferator-Activated Receptors (PPARs)	NA	Szilagyi J.T., Avula V., Fry R.C.	(Szilagyi J.T.; Avula V.; Fry R.C., rfry@email.unc.edu) Department of Environmental Sciences and Engineering, Gillings School of Global Public Health, University of North Carolina, Chapel Hill, United States. , (Szilagyi J.T.; Fry R.C., rfry@email.unc.edu) Curriculum in Toxicology and Environmental Medicine, University of North Carolina, Chapel Hill, United States. , (Avula V.; Fry R.C., rfry@ema…	NA	NA	2020-08-26	2021-02-02	Current environmental health reports (2020) 7:3 (222-230). Date of Publication: 1 Sep 2020	Current environmental health reports	2020	7	3	222	230	2020-09-01	Review	NA	NA	NA	NA	2196-5412 (electronic)	NA	NLM (Medline)	PURPOSE OF REVIEW: This review summarizes studies highlighting perfluoroalkyl substances (PFAS) and their effects on the placenta, pregnancy outcomes, and child health. It highlights human population-based associations as well as in vitro-based experimental data to inform an understanding of the molecular mechanisms underlying these health effects. Among the mechanisms by which PFAS may induce to…	NA	Development,In utero,PFAS,Placenta,PPAR,Preeclampsia,Pregnancy	NA	fluorocarbon (drug toxicity), peroxisome proliferator activated receptor	adverse event, drug effect, metabolism	adult, child, child development, child health, environmental exposure, female, fetus, human, maternal exposure, placenta, pregnancy, pregnancy diabetes mellitus, pregnancy outcome, prenatal exposure	NA	NA	NA	NA
n006	nPM006	32861749	Early life exposure to per- and polyfluoroalkyl substances (PFAS) and latent health outcomes: A review including the placenta as a target tissue and possible driver of peri- and postnatal effects	Blake BE, Fenton SE.	Toxicology. 2020 Oct;443:152565. doi: 10.1016/j.tox.2020.152565. Epub 2020 Aug 27.	Blake BE	Toxicology	2020	2020-08-31	PMC7530144	NIHMS1627933	10.1016/j.tox.2020.152565	TRUE	nEm190	Early life exposure to per- and polyfluoroalkyl substances (PFAS) and latent health outcomes: A review including the placenta as a target tissue and possible driver of peri- and postnatal effects	NA	Blake B.E., Fenton S.E.	(Blake B.E., bevin.blake@nih.gov) Curriculum in Toxicology and Environmental Medicine, University of North Carolina at Chapel Hill, Chapel Hill, NC, United States. , (Blake B.E., bevin.blake@nih.gov; Fenton S.E.) Division of the National Toxicology Program (DNTP), NTP Laboratory, National Institute of Environmental Health Sciences (NIEHS), National Institute of Health (NIH), Research Triangle Par…	B.E. Blake, 111 T.W. Alexander Drive, MD E1-08, RTP, NC, United States. Email: bevin.blake@nih.gov	NA	2020-09-18	2020-10-27	Toxicology (2020) 443 Article Number: 152565. Date of Publication: 1 Oct 2020	Toxicology	2020	443	NA	NA	NA	2020-10-01	Review	NA	NA	NA	NA	1879-3185 (electronic),0300-483X	NA	Elsevier Ireland Ltd	Per- and polyfluoroalkyl substances (PFAS) are ubiquitous drinking water contaminants of concern due to mounting evidence implicating adverse health outcomes associated with exposure, including reduced kidney function, metabolic syndrome, thyroid disruption, and adverse pregnancy outcomes. PFAS have been produced in the U.S. since the 1940s and now encompass a growing chemical family comprised of…	NA	NA	organofluorine derivative (drug toxicity), perfluoro compound (drug toxicity), perfluoroalkyl derivative (drug toxicity), polyfluoroalkyl derivative (drug toxicity)	perfluorohexanoic acid, unclassified drug	health hazard, placenta, prenatal exposure	adult disease, biology, environmental exposure, human, kidney disease, low birth weight, maternal hypertension, metabolic syndrome X, physical chemistry, preeclampsia, pregnancy outcome, priority journal, review, thyroid disease, United States	NA	NA	NA	NA
n007	nPM007	36192506	Hormonal regulation of mammary gland development and lactation	Hannan FM, Elajnaf T, Vandenberg LN, Kennedy SH, Thakker RV.	Nat Rev Endocrinol. 2023 Jan;19(1):46-61. doi: 10.1038/s41574-022-00742-y. Epub 2022 Oct 3.	Hannan FM	Nat Rev Endocrinol	2023	2022-10-03	NA	NA	10.1038/s41574-022-00742-y	FALSE	NA	NA	NA	NA	NA	NA	NA	NA	NA	NA	NA	NA	NA	NA	NA	NA	NA	NA	NA	NA	NA	NA	NA	NA	NA	NA	NA	NA	NA	NA	NA	NA	NA	NA	NA	NA
n008	nPM008	35569538	Health-related toxicity of emerging per- and polyfluoroalkyl substances: Comparison to legacy PFOS and PFOA	Jane L Espartero L, Yamada M, Ford J, Owens G, Prow T, Juhasz A.	Environ Res. 2022 Sep;212(Pt C):113431. doi: 10.1016/j.envres.2022.113431. Epub 2022 May 13.	Jane L Espartero L	Environ Res	2022	2022-05-15	NA	NA	10.1016/j.envres.2022.113431	TRUE	nEm026	Health-related toxicity of emerging per- and polyfluoroalkyl substances: Comparison to legacy PFOS and PFOA	NA	Jane L Espartero L., Yamada M., Ford J., Owens G., Prow T., Juhasz A.	(Jane L Espartero L.; Yamada M.; Owens G.; Prow T.; Juhasz A., Albert.Juhasz@unisa.edu.au) Future Industries Institute (FII), University of South Australia, Mawson Lakes, SA, Australia. , (Ford J.) University of Sydney, New South Wales, United Kingdom. , (Prow T.) Skin Research Centre, York Biomedical Research Institute, Hull York Medical School, University of York, United Kingdom.	A. Juhasz, FII, University of South Australia, Mawson Lakes, SA, Australia. Email: Albert.Juhasz@unisa.edu.au	NA	2022-05-27	2022-07-18	Environmental Research (2022) 212 Article Number: 113431. Date of Publication: 1 Sep 2022	Environmental Research	2022	212	NA	NA	NA	2022-09-01	Review	NA	NA	NA	NA	1096-0953 (electronic),0013-9351	NA	Academic Press Inc.	Per- and polyfluoroalkyl substances (PFAS) are highly persistent, manufactured chemicals used in various manufacturing processes and found in numerous commercial products. With over 9000 compounds belonging to this chemical class, there is increasing concern regarding human exposure to these compounds due to their persistent, bioaccumulative, and toxic nature. Human exposure to PFAS may occur fro…	NA	Health effects,Human health,Per- and polyfluoroalkyl substances,PFAS,Toxicity	perfluoroctane sulfonate (drug toxicity), perfluorooctanoic acid (drug toxicity)	peroxisome proliferator activated receptor (endogenous compound), unclassified drug	acute toxicity, health status	adverse event, bioaccumulation, bone disease, breast cancer, cardiovascular effect, carotid atherosclerosis, childhood, clinical evaluation, comparative study, cytotoxicity, disease association, endocrine function, female fertility, human, immune response, immunotoxicity, kidney dysfunction, kidney function, lipid metabolism, liver dysfunction, liver function, locomotion, long term exposure, male…	NA	NA	NA	NA
n009	nPM009	34886275	Per- and Polyfluoroalkyl Substances (PFAS) in Integrated Crop-Livestock Systems: Environmental Exposure and Human Health Risks	Jha G, Kankarla V, McLennon E, Pal S, Sihi D, Dari B, Diaz D, Nocco M.	Int J Environ Res Public Health. 2021 Nov 28;18(23):12550. doi: 10.3390/ijerph182312550.	Jha G	Int J Environ Res Public Health	2021	2021-12-10	PMC8657007	NA	10.3390/ijerph182312550	TRUE	nEm076	Per-and polyfluoroalkyl substances (PFAS) in integrated cropâ€“livestock systems: Environmental exposure and human health risks	NA	Jha G., Kankarla V., McLennon E., Pal S., Sihi D., Dari B., Diaz D., Nocco M.	(Jha G., gjha@ucdavis.edu; Diaz D., imddiaz@ucdavis.edu; Nocco M., manocco@ucdavis.edu) Department of Land, Air and Water Resources, University of California, Davis, CA, United States. , (Kankarla V., vkankarla@tamu.edu) Department of Soil and Crop Sciences, Texas A&M University, College Station, TX, United States. , (McLennon E., everald.mclennon@oregonstate.edu) Department of Crop and Soil Scie…	G. Jha, Department of Land, Air and Water Resources, University of California, Davis, CA, United States. Email: gjha@ucdavis.edu	NA	2021-11-30	2022-02-15	International Journal of Environmental Research and Public Health (2021) 18:23 Article Number: 12550. Date of Publication: 1 Dec 2021	International Journal of Environmental Research and Public Health	2021	18	23	NA	NA	2021-12-01	Article	NA	NA	NA	NA	1660-4601 (electronic),1661-7827	NA	MDPI	Per-and polyfluoroalkyl substances (PFAS) are highly persistent synthetic organic contaminants that can cause serious human health concerns such as obesity, liver damage, kidney cancer, hypertension, immunotoxicity and other human health issues. Integrated cropâ€“livestock systems combine agricultural crop production with milk and/or meat production and processing. Key sources of PFAS in these sy…	NA	Chronic kidney disease,Environmental justice,Exposure pathway,Foaming agent,Forever chemicals,Groundwater contaminants,Livestock contaminations,Remediation,Renal dysfunction	organic compound, perfluoroalkyl substance, polyfluoroalkyl substance	drinking water, ground water, surface water, unclassified drug	environmental exposure, farming system, health hazard, human impact (environment), integrated crop livestock system	article, bioremediation, concentration (parameter), crop production, industrial waste, meat, meat industry, milk production, risk assessment, screening test, sludge, soil analysis, United States, wastewater, water sampling	NA	NA	NA	NA
n010	nPM010	34500361	Prenatal and postnatal exposure to PFAS and cardiometabolic factors and inflammation status in children from six European cohorts	Papadopoulou E, Stratakis N, BasagaÃ±a X, BrantsÃ¦ter AL, Casas M, Fossati S, GraÅ¾uleviÄienÄ— R, SmÃ¥stuen Haug L, Heude B, Maitre L, McEachan RRC, Robinson O, Roumeliotaki T, SabidÃ³ E, BorrÃ s E, Urquiza J, Vafeiadi M, Zhao Y, Slama R, Wright J, Conti DV, Vrijheid M, Chatzi L.	Environ Int. 2021 Dec;157:106853. doi: 10.1016/j.envint.2021.106853. Epub 2021 Sep 6.	Papadopoulou E	Environ Int	2021	2021-09-09	NA	NA	10.1016/j.envint.2021.106853	TRUE	nEm075	Prenatal and postnatal exposure to PFAS and cardiometabolic factors and inflammation status in children from six European cohorts	NA	Papadopoulou E., Stratakis N., BasagaÃ±a X., BrantsÃ¦ter A.L., Casas M., Fossati S., GraÅ¾uleviÄienÄ— R., SmÃ¥stuen Haug L., Heude B., Maitre L., McEachan R.R.C., Robinson O., Roumeliotaki T., SabidÃ³ E., BorrÃ s E., Urquiza J., Vafeiadi M., Zhao Y., Slama R., Wright J., Conti D.V., Vrijheid M., Chatzi L.	(Papadopoulou E., elpa@fhi.no; BrantsÃ¦ter A.L.; SmÃ¥stuen Haug L.) Norwegian Institute of Public Health, Oslo, Norway. , (Stratakis N.; Zhao Y.; Conti D.V.; Chatzi L.) Department of Preventive Medicine, Keck School of Medicine, University of Southern California, Los Angeles, United States. , (Stratakis N.) Department of Complex Genetics and Epidemiology, CAPHRI School for Public Health and Prima…	E. Papadopoulou, Department of Environmental Health, Norwegian Institute of Public Health, Folkehelseinstituttet, Postboks 222 SkÃ¸yen, Oslo, Norway. Email: elpa@fhi.no	NA	2021-09-15	2022-03-29	Environment International (2021) 157 Article Number: 106853. Date of Publication: 1 Dec 2021	Environment International	2021	157	NA	NA	NA	2021-12-01	Article	NA	NA	NA	NA	1873-6750 (electronic),0160-4120	NA	Elsevier Ltd	Developing children are particularly vulnerable to the effects of exposure to per- and polyfluoroalkyl substances (PFAS), a group of endocrine disrupting chemicals. We hypothesized that early life exposure to PFASs is associated with poor metabolic health in children. We studied the association between prenatal and postnatal PFASs mixture exposure and cardiometabolic health in children, and the r…	NA	Adiposity,BKMR,Cardiometabolic risk,HDL,Inflammation,PFAS	organofluorine derivative (special situation for pharmacovigilance), perfluoroalkyl substance (special situation for pharmacovigilance), polyfluoroalkyl substance (special situation for pharmacovigilance)	alpha interferon (endogenous compound), high density lipoprotein cholesterol (endogenous compound), interleukin 13 (endogenous compound), interleukin 1beta (endogenous compound), interleukin 4 (endogenous compound), interleukin 6 (endogenous compound), interleukin 8 (endogenous compound), leptin (endogenous compound), low density lipoprotein cholesterol (endogenous compound), macrophage inflammat…	cardiometabolic risk, childhood disease, inflammation, perinatal exposure, prenatal exposure	article, blood sampling, child, cohort analysis, diastolic blood pressure, female, human, major clinical study, male, pregnancy, systolic blood pressure, triacylglycerol blood level, waist circumference	NA	NA	NA	NA
n011	nPM011	33984575	Environmental exposure to perfluoroalkyl substances in early pregnancy, maternal glucose homeostasis and the risk of gestational diabetes: A prospective cohort study	Yu G, Jin M, Huang Y, Aimuzi R, Zheng T, Nian M, Tian Y, Wang W, Luo Z, Shen L, Wang X, Du Q, Xu W, Zhang J; Shanghai Birth Cohort Study.	Environ Int. 2021 Nov;156:106621. doi: 10.1016/j.envint.2021.106621. Epub 2021 May 11.	Yu G	Environ Int	2021	2021-05-13	NA	NA	10.1016/j.envint.2021.106621	TRUE	nEm083	Environmental exposure to perfluoroalkyl substances in early pregnancy, maternal glucose homeostasis and the risk of gestational diabetes: A prospective cohort study	NA	Yu G., Jin M., Huang Y., Aimuzi R., Zheng T., Nian M., Tian Y., Wang W., Luo Z., Shen L., Wang X., Du Q., Xu W., Zhang J.	(Yu G.; Tian Y.; Wang W.; Luo Z.; Zhang J., junjimzhang@sina.com) Ministry of Education -Shanghai Key Laboratory of Children's Environmental Health, Xinhua Hospital, Shanghai Jiao Tong University School of Medicine, Shanghai, China. , (Jin M.; Zheng T.; Wang X.) Department of Obstetrics and Gynecology, Xinhua Hospital, Shanghai Jiao Tong University School of Medicine, Shanghai, China. , (Huang Y.…	Q. Du, Xinhua Hospital, Shanghai Jiao Tong University School of Medicine, Shanghai, China. Email: duqing@xinuamed.com.cn	NA	2021-05-20	2021-10-13	Environment International (2021) 156 Article Number: 106621. Date of Publication: 1 Nov 2021	Environment International	2021	156	NA	NA	NA	2021-11-01	Article	NA	NA	NA	NA	1873-6750 (electronic),0160-4120	NA	Elsevier Ltd	Background: Humans are widely exposed to environmental perfluoroalkyl substances (PFAS), which may affect glucose homeostasis. However, research linking PFAS exposure to glucose homeostasis during pregnancy is limited and the results were inconsistent. We aimed to investigate the association between PFAS exposure and glucose homeostasis in pregnancy in a large prospective cohort. Methods: A total…	NA	Gestational diabetes mellitus,Glucose homeostasis,Obese status,Perfluoroalkyl substances	perfluoro compound	glucose (endogenous compound), perfluorobutane sulfonate, perfluorodecanoic acid, perfluoroheptanoic acid, perfluorohexanesulfonic acid, perfluorononanoic acid, perfluorooctanesulfonic acid, unclassified drug	environmental exposure, first trimester pregnancy, glucose homeostasis, pregnancy diabetes mellitus, risk factor	adult, article, blood sampling, body mass, cohort analysis, concentration (parameter), controlled study, female, gestational age, glucose blood level, high performance liquid chromatography, human, incidence, major clinical study, maternal plasma, oral glucose tolerance test, prospective study, sensitivity analysis, tandem mass spectrometry	NA	NA	NA	NA
n012	nPM012	27216159	Environmental pollutants and child health-A review of recent concerns	Vrijheid M, Casas M, Gascon M, Valvi D, Nieuwenhuijsen M.	Int J Hyg Environ Health. 2016 Jul;219(4-5):331-42. doi: 10.1016/j.ijheh.2016.05.001. Epub 2016 May 11.	Vrijheid M	Int J Hyg Environ Health	2016	2016-05-25	NA	NA	10.1016/j.ijheh.2016.05.001	TRUE	nEm437	Environmental pollutants and child health-A review of recent concerns	NA	Vrijheid M., Casas M., Gascon M., Valvi D., Nieuwenhuijsen M.	(Vrijheid M., mvrijheid@creal.cat; Casas M.; Nieuwenhuijsen M.) ISGlobal, Centre for Research in Environmental Epidemiology (CREAL), Barcelona, Spain; Universitat Pompeu Fabra (UPF), Barcelona, Spain; CIBER EpidemiologÃ­a y Salud PÃºblica (CIBERESP), Barcelona, Spain, (Gascon M.) ISGlobal, Centre for Research in Environmental Epidemiology (CREAL), Barcelona, Spain; Universitat Pompeu Fabra (UPF),…	NA	NA	NA	2017-09-11	International journal of hygiene and environmental health (2016) 219:4-5 (331-342). Date of Publication: 1 Jul 2016	International journal of hygiene and environmental health	2016	219	2023-04-05	331	342	2016-07-01	Review	NA	NA	NA	NA	1618-131X (electronic)	NA	NA	In recent years, many new studies have evaluated associations between environmental pollutants and child health. This review aims to provide a broad summary of this literature, comparing the state of epidemiological evidence for the effects of a wide range of environmental contaminants (air pollutants, heavy metals, organochlorine compounds, perfluoroalkyl substances, polybrominated diphenyl ethe…	NA	Child health,Environmental pollutants,Pregnancy	NA	pollutant	child health, toxicity	child, child development, drug effect, fetus development, human, immune system, mental disease (epidemiology), obesity (epidemiology), pollutant, prematurity (epidemiology), respiratory tract disease (epidemiology)	NA	NA	NA	NA
n013	nPM013	33038367	PFAS concentration during pregnancy in relation to cardiometabolic health and birth outcomes	Gardener H, Sun Q, Grandjean P.	Environ Res. 2021 Jan;192:110287. doi: 10.1016/j.envres.2020.110287. Epub 2020 Oct 8.	Gardener H	Environ Res	2021	2020-10-10	PMC7736328	NIHMS1635691	10.1016/j.envres.2020.110287	TRUE	nEm165	PFAS concentration during pregnancy in relation to cardiometabolic health and birth outcomes	NA	Gardener H., Sun Q., Grandjean P.	(Gardener H., hgardener@med.miami.edu) University of Miami Miller School of Medicine, Miami, FL, United States. , (Sun Q.; Grandjean P.) Harvard TH Chan School of Public Health, Boston, MA, United States. , (Sun Q.) Channing Division of Network Medicine, Department of Medicine, Brigham and Women's Hospital and Harvard Medical School, United States. , (Grandjean P.) University of Southern Denmark,…	H. Gardener, Department of Neurology, Miller School of Medicine, University of Miami, Clinical Research Building, 1120 NW 14th Street, Miami, FL, United States. Email: hgardener@med.miami.edu	NA	2020-10-27	2020-12-02	Environmental Research (2021) 192 Article Number: 110287. Date of Publication: 1 Jan 2021	Environmental Research	2021	192	NA	NA	NA	2021-01-01	Article	NA	NA	NA	NA	1096-0953 (electronic),0013-9351	NA	Academic Press Inc.	Introduction: Poly- and perfluoroalkyl substances (PFAS) are persistent organic pollutants with pervasive exposure and suspected associations with metabolic abnormalities and adverse pregnancy outcomes. The goal of the present study was to examine the relationship between serum-PFAS concentrations measured in late pregnancy with relevant outcomes. Methods: The study sample included 433 pregnant w…	NA	Birth weight,Cholesterol,Insulin,Pregnancy,Triglycerides	alkyl group	cholesterol (endogenous compound), insulin (endogenous compound), triacylglycerol (endogenous compound)	blood level, persistent organic pollutant, pregnancy, pregnancy outcome	adult, article, birth weight, case control study, cholesterol blood level, female, gestational age, human, insulin blood level, major clinical study, pregnant woman, priority journal, third trimester pregnancy, triacylglycerol blood level	NA	NA	NA	NA
n014	nPM014	34735953	Per- and polyfluoroalkyl substance (PFAS) exposure, maternal metabolomic perturbation, and fetal growth in African American women: A meet-in-the-middle approach	Chang CJ, Barr DB, Ryan PB, Panuwet P, Smarr MM, Liu K, Kannan K, Yakimavets V, Tan Y, Ly V, Marsit CJ, Jones DP, Corwin EJ, Dunlop AL, Liang D.	Environ Int. 2022 Jan;158:106964. doi: 10.1016/j.envint.2021.106964. Epub 2021 Nov 1.	Chang CJ	Environ Int	2022	2021-11-04	PMC8688254	NIHMS1753747	10.1016/j.envint.2021.106964	TRUE	nEm065	Per- and polyfluoroalkyl substance (PFAS) exposure, maternal metabolomic perturbation, and fetal growth in African American women: A meet-in-the-middle approach	NA	Chang C.-J., Barr D.B., Ryan P.B., Panuwet P., Smarr M.M., Liu K., Kannan K., Yakimavets V., Tan Y., Ly V., Marsit C.J., Jones D.P., Corwin E.J., Dunlop A.L., Liang D.	(Chang C.-J.; Barr D.B.; Ryan P.B.; Panuwet P.; Smarr M.M.; Yakimavets V.; Marsit C.J.; Liang D., donghai.liang@emory.edu) Gangarosa Department of Environmental Health, Rollins School of Public Health, Emory University, Atlanta, GA, United States. , (Liu K.; Ly V.; Jones D.P.) Department of Medicine, School of Medicine, Emory University, Atlanta, GA, United States. , (Kannan K.) Department of Ped…	D. Liang, 1518 Clifton Rd, Atlanta, GA, United States. Email: donghai.liang@emory.edu	NA	2021-11-12	2022-01-28	Environment International (2022) 158 Article Number: 106964. Date of Publication: 1 Jan 2022	Environment International	2022	158	NA	NA	NA	2022-01-01	Article	NA	NA	NA	NA	1873-6750 (electronic),0160-4120	NA	Elsevier Ltd	Background: Prenatal exposures to per- and polyfluoroalkyl substances (PFAS) have been linked to reduced fetal growth. However, the detailed molecular mechanisms remain largely unknown. This study aims to investigate biological pathways and intermediate biomarkers underlying the association between serum PFAS and fetal growth using high-resolution metabolomics in a cohort of pregnant African Amer…	NA	Biomarkers,Fetal growth,High-resolution metabolomics,PFAS	organofluorine derivative (drug toxicity), perfluoroalkyl substance (drug toxicity), polyfluoroalkyl substance (drug toxicity)	2 hexyl 3 phenyl 2 propenal (endogenous compound), aldehyde (endogenous compound), androgen (endogenous compound), bile acid (endogenous compound), ferulic acid (endogenous compound), glycine (endogenous compound), perfluorohexanesulfonic acid (drug toxicity), perfluorononanoic acid (drug toxicity), perfluorooctanesulfonic acid (drug toxicity), perfluorooctanoic acid (drug toxicity), taurine (end…	fetus growth, metabolomics, pregnancy, prenatal exposure	adult, African American, amino acid metabolism, article, bile acid metabolism, birth weight, cohort analysis, controlled study, fatty acid metabolism, female, fetus, Georgia (U.S.), gestation period, hormone metabolism, human, infant, lipid metabolism, low birth weight, major clinical study, male, metabolite, metabolome, prematurity, risk factor, small for gestational age	NA	NA	NA	NA
n015	nPM015	34237336	Per- and polyfluoroalkyl substances exposure during pregnancy and adverse pregnancy and birth outcomes: A systematic review and meta-analysis	Gao X, Ni W, Zhu S, Wu Y, Cui Y, Ma J, Liu Y, Qiao J, Ye Y, Yang P, Liu C, Zeng F.	Environ Res. 2021 Oct;201:111632. doi: 10.1016/j.envres.2021.111632. Epub 2021 Jul 6.	Gao X	Environ Res	2021	2021-07-08	NA	NA	10.1016/j.envres.2021.111632	TRUE	nEm087	Per- and polyfluoroalkyl substances exposure during pregnancy and adverse pregnancy and birth outcomes: A systematic review and meta-analysis	NA	Gao X., Ni W., Zhu S., Wu Y., Cui Y., Ma J., Liu Y., Qiao J., Ye Y., Yang P., Liu C., Zeng F.	(Gao X.; Ni W.; Cui Y.; Ma J.; Qiao J.; Zeng F., zengffjnu@126.com) Department of Epidemiology, School of Basic Medicine and Public Health, Jinan University, No.601 Huangpu Road West, Guangzhou, Guangdong, China. , (Gao X.) Department of Child & Adolescent Psychiatry, Peking University Sixth Hospital (Institute of Mental Health), National Clinical Research Center for Mental Disorders and NHC Key …	F. Zeng, Department of Epidemiology, School of Basic Medicine and Public Health, Jinan University, No.601 Huangpu Road West, Guangzhou, Guangdong, China. Email: zengffjnu@126.com""C. Liu, Department of Nutrition, School of Medicine, Jinan University, No.601 Huangpu Road West, Guangzhou, Guangdong, China. Email: chaoqunliu@jnu.edu.cn	NA	2021-07-16	2021-07-21	Environmental Research (2021) 201 Article Number: 111632. Date of Publication: 1 Oct 2021	Environmental Research	2021	201	NA	NA	NA	2021-10-01	Review	NA	NA	NA	NA	1096-0953 (electronic),0013-9351	NA	Academic Press Inc.	Background: Exposure to per- and polyfluoroalkyl substances (PFAS) during pregnancy has been suggested to be associated with adverse pregnancy and birth outcomes; however, the findings have been inconsistent. We aimed to conduct a systematic review and meta-analysis to provide an overview of these associations. Methods: The online databases PubMed, EMBASE and Web of Science were searched comprehe…	NA	Adverse birth outcome,Adverse pregnancy outcome,PFAS,Pregnancy	organofluorine derivative (drug toxicity), perfluoroalkanoic acid (drug toxicity), polyfluoroalkyl substance (drug toxicity), toxic substance (drug toxicity)	n methyl perfluorooctane sulfonamide acetate (drug toxicity), perfluorobutane sulfonate (drug toxicity), perfluorobutanoate (drug toxicity), perfluorodecanoic acid (drug toxicity), perfluorohexanesulfonic acid (drug toxicity), perfluorohexanoic acid (drug toxicity), perfluorononanoic acid (drug toxicity), perfluorooctane sulfonamide (drug toxicity), perfluorooctanesulfonic acid (drug toxicity), p…	adverse outcome, pregnancy, pregnancy outcome, prenatal exposure	adolescent, adult, case control study, cohort analysis, disease association, Embase, environmental exposure, evidence based practice, female, fetus outcome, high risk pregnancy (etiology), human, intrauterine growth retardation (etiology), large for gestational age (etiology), low birth weight (etiology), maternal blood, maternal exposure, maternal hypertension (etiology), Medline, mother, newbor…	NA	NA	NA	NA
n016	nPM016	34483008	Exposome and foetoplacental vascular dysfunction in gestational diabetes mellitus	Valero P, Fuentes G, Cornejo M, Vega S, Grismaldo A, Pardo F, GarcÃ­a-Rivas G, Hillebrands JL, Faas MM, Casanello P, van der Beek EM, van Goor H, Sobrevia L.	Mol Aspects Med. 2022 Oct;87:101019. doi: 10.1016/j.mam.2021.101019. Epub 2021 Sep 2.	Valero P	Mol Aspects Med	2022	2021-09-06	NA	NA	10.1016/j.mam.2021.101019	TRUE	nEm021	Exposome and foetoplacental vascular dysfunction in gestational diabetes mellitus	NA	Valero P., Fuentes G., Cornejo M., Vega S., Grismaldo A., Pardo F., GarcÃ­a-Rivas G., Hillebrands J.-L., Faas M.M., Casanello P., van der Beek E.M., van Goor H., Sobrevia L.	(Valero P.; Fuentes G.; Cornejo M.; Vega S.; Grismaldo A.; Pardo F.; Sobrevia L., lsobrevia@uc.cl) Cellular and Molecular Physiology Laboratory (CMPL), Department of Obstetrics, Division of Obstetrics and Gynaecology, School of Medicine, Faculty of Medicine, Pontificia Universidad CatÃ³lica de Chile, Santiago, Chile. , (Valero P.; Fuentes G.; Cornejo M.) Faculty of Health Sciences, Universidad de…	L. Sobrevia, Cellular and Molecular Physiology Laboratory (CMPL), Department of Obstetrics, Division of Obstetrics and Gynaecology, School of Medicine, Faculty of Medicine, Pontificia Universidad CatÃ³lica de Chile, 114-D, Santiago, Chile. Email: lsobrevia@uc.cl	NA	2021-09-09	2021-09-09	Molecular Aspects of Medicine (2022) 87 Article Number: 101019. Date of Publication: 1 Oct 2022	Molecular Aspects of Medicine	2022	87	NA	NA	NA	2022-10-01	Review	NA	NA	NA	NA	1872-9452 (electronic),0098-2997	NA	Elsevier Ltd	A balanced communication between the mother, placenta and foetus is crucial to reach a successful pregnancy. Several windows of exposure to environmental toxins are present during pregnancy. When the women metabolic status is affected by a disease or environmental toxin, the foetus is impacted and may result in altered development and growth. Gestational diabetes mellitus (GDM) is a disease of pr…	NA	Diabesity,Exposome,Gestational diabesity,Gestational diabetes,Obesity,Vascular	NA	adenosine (endogenous compound), arsenic, copper, fluorinated hydrocarbon, lead, lipid (endogenous compound), mercury, selenium (endogenous compound), vitamin B group (endogenous compound), vitamin D (endogenous compound)	exposome, fetoplacental unit, pregnancy diabetes mellitus, vascular disease	cardiovascular function, ecto exposome, endo exposome, endothelial dysfunction, environmental factor, health impact assessment, human, lipid diet, low fat diet, nonhuman, placenta, postnatal care, prevalence, review	NA	NA	NA	NA
n017	nPM017	32074459	Evaluation of Maternal, Embryo, and Placental Effects in CD-1 Mice following Gestational Exposure to Perfluorooctanoic Acid (PFOA) or Hexafluoropropylene Oxide Dimer Acid (HFPO-DA or GenX)	Blake BE, Cope HA, Hall SM, Keys RD, Mahler BW, McCord J, Scott B, Stapleton HM, Strynar MJ, Elmore SA, Fenton SE.	Environ Health Perspect. 2020 Feb;128(2):27006. doi: 10.1289/EHP6233. Epub 2020 Feb 13.	Blake BE	Environ Health Perspect	2020	2020-02-20	PMC7064328	NA	10.1289/ehp6233	TRUE	nEm233	Evaluation of maternal, embryo, and placental effects in CD-1 mice following gestational exposure to perfluorooctanoic acid (PFOA) or hexafluoropropylene oxide dimer acid (HFPO-DA or GenX)	NA	Blake B.E., Cope H.A., Hall S.M., Keys R.D., Mahler B.W., McCord J., Scott B., Stapleton H.M., Strynar M.J., Elmore S.A., Fenton S.E.	(Blake B.E.) Curriculum in Toxicology and Environmental Medicine, University of North Carolina at Chapel Hill, Chapel Hill, NC, United States. , (Blake B.E.; Cope H.A.; Fenton S.E., fentonse@niehs.nih.gov) Division of the National Toxicology Program (DNTP), NTP Laboratory, National Institute of Environmental Health Sciences (NIEHS), National Institutes of Health (NIH), Research Triangle Park, NC,…	S.E. Fenton, T.W. Alexander Drive, MD E1-08, Research Triangle Park, NC, United States. Email: fentonse@niehs.nih.gov	NA	2020-02-25	2020-03-02	Environmental Health Perspectives (2020) 128:2 Article Number: 027006. Date of Publication: 2020	Environmental Health Perspectives	2020	128	2	NA	NA	2020	Article	NA	NA	NA	NA	1552-9924 (electronic),0091-6765	NA	Public Health Services, US Dept of Health and Human Services, ehp@jjeditorial.com	BACKGROUND: Perfluorooctanoic acid (PFOA) is a poly-and perfluoroalkyl substance (PFAS) associated with adverse pregnancy outcomes in mice and humans, but little is known regarding one of its replacements, hexafluoropropylene oxide dimer acid (HFPO-DA, referred to here as GenX), both of which have been reported as contaminants in drinking water. OBJECTIVES: We compared the toxicity of PFOA and Ge…	NA	NA	hexafluoropropylene oxide dimer acid (drug toxicity), perfluoro compound (drug toxicity), perfluorooctanoic acid (drug toxicity)	unclassified drug	pregnancy outcome, prenatal drug exposure	amnion fluid analysis, animal experiment, animal model, animal tissue, article, clinical chemistry, clinical evaluation, clinical outcome, controlled study, dosimetry, drug toxicity, electron microscope, embryo, female, fetus weight, gestational weight gain, high performance liquid chromatography, histopathology, hormone determination, latent period, liver weight, mouse, nonhuman, outcome assessm…	NA	MilliporeSigma, SynQuest	Techani T12 (FEI)	FEI
n018	nPM018	35793087	Association of Prenatal Exposure to Endocrine-Disrupting Chemicals With Liver Injury in Children	Midya V, Colicino E, Conti DV, Berhane K, Garcia E, Stratakis N, Andrusaityte S, BasagaÃ±a X, Casas M, Fossati S, GraÅ¾uleviciene R, Haug LS, Heude B, Maitre L, McEachan R, Papadopoulou E, Roumeliotaki T, Philippat C, Thomsen C, Urquiza J, Vafeiadi M, Varo N, Vos MB, Wright J, McConnell R, Vrijheid M, Chatzi L, Valvi D.	JAMA Netw Open. 2022 Jul 1;5(7):e2220176. doi: 10.1001/jamanetworkopen.2022.20176.	Midya V	JAMA Netw Open	2022	2022-07-06	PMC9260485	NA	10.1001/jamanetworkopen.2022.20176	TRUE	nEm038	Association of Prenatal Exposure to Endocrine-Disrupting Chemicals with Liver Injury in Children	NA	Midya V., Colicino E., Conti D.V., Berhane K., Garcia E., Stratakis N., Andrusaityte S., BasagaÃ±a X., Casas M., Fossati S., GraÅ¾uleviÄienÄ— R., Haug L.S., Heude B., Maitre L., McEachan R., Papadopoulou E., Roumeliotaki T., Philippat C., Thomsen C., Urquiza J., Vafeiadi M., Varo N., Vos M.B., Wright J., McConnell R., Vrijheid M., Chatzi L., Valvi D.	(Midya V.; Colicino E.; Valvi D., dania.valvi@mssm.edu) Department of Environmental Medicine and Public Health, Icahn School of Medicine at Mount Sinai, New York City, NY, United States. , (Conti D.V.; Garcia E.; Stratakis N.; McConnell R.; Chatzi L.) Department of Population and Public Health Sciences, Keck School of Medicine, University of Southern California, Los Angeles, United States. , (Ber…	D. Valvi, One Gustave L. Levy Place, PO Box 1057, New York, NY, United States. Email: dania.valvi@mssm.edu	NA	2022-07-19	2022-08-04	JAMA Network Open (2022) 5:7 (E2220176). Date of Publication: 6 Jul 2022	JAMA Network Open	2022	5	7	E2220176	NA	2022-07-06	Article	NA	NA	NA	NA	2574-3805 (electronic)	NA	American Medical Association	Importance: Prenatal exposures to endocrine-disrupting chemicals (EDCs) may increase the risk for liver injury in children; however, human evidence is scarce, and previous studies have not considered potential EDC-mixture effects. Furthermore, the association between prenatal EDC exposure and hepatocellular apoptosis in children has not been studied previously. Objective: To investigate associati…	NA	NA	endocrine disruptor (drug toxicity)	4 hydroxybenzoic acid ester (drug toxicity), alanine aminotransferase (endogenous compound), aspartate aminotransferase (endogenous compound), cytokeratin 18 (endogenous compound), gamma glutamyltransferase (endogenous compound), metal (drug toxicity), organochlorine pesticide (drug toxicity), organophosphate pesticide (drug toxicity), perfluoroalkyl substance (drug toxicity), phenol derivative (…	liver injury, prenatal exposure	alanine aminotransferase blood level, article, aspartate aminotransferase blood level, Bayes theorem, birth cohort, bromination, child, cohort analysis, disease association, exposome, female, France, Greece, human, human tissue, Lithuania, major clinical study, male, maternal blood, molecular weight, nonalcoholic fatty liver, Norway, odds ratio, pregnancy, preschool child, prospective study, prot…	NA	NA	NA	NA
n019	nPM019	31726361	Exposures to chemical mixtures during pregnancy and neonatal outcomes: The HOME study	Kalloo G, Wellenius GA, McCandless L, Calafat AM, Sjodin A, Romano ME, Karagas MR, Chen A, Yolton K, Lanphear BP, Braun JM.	Environ Int. 2020 Jan;134:105219. doi: 10.1016/j.envint.2019.105219. Epub 2019 Nov 12.	Kalloo G	Environ Int	2020	2019-11-15	NA	NA	10.1016/j.envint.2019.105219	TRUE	nEm232	Exposures to chemical mixtures during pregnancy and neonatal outcomes: The HOME study	NA	Kalloo G., Wellenius G.A., McCandless L., Calafat A.M., Sjodin A., Romano M.E., Karagas M.R., Chen A., Yolton K., Lanphear B.P., Braun J.M.	(Kalloo G., geetika_kalloo@brown.edu; Wellenius G.A.; Braun J.M.) Department of Epidemiology, Brown University, Providence, RI, United States. , (McCandless L.; Lanphear B.P.) Faculty of Health Sciences, Simon Fraser University, Burnaby, BC, Canada. , (Calafat A.M.; Sjodin A.) Centers for Disease Control and Prevention, Atlanta, GA, United States. , (Romano M.E.; Karagas M.R.) Department of Epide…	G. Kalloo, Brown University School of Public Health, Box G-S121-3, Providence, RI, United States. Email: geetika_kalloo@brown.edu	NA	2019-11-19	2020-12-11	Environment International (2020) 134 Article Number: 105219. Date of Publication: 1 Jan 2020	Environment International	2020	134	NA	NA	NA	2020-01-01	Article	NA	NA	NA	NA	1873-6750 (electronic),0160-4120	NA	Elsevier Ltd	Introduction: Exposure to mixtures of environmental chemicals are prevalent among pregnant women and may be associated with altered fetal growth and gestational age. To date, most research regarding environmental chemicals and neonatal outcomes has focused on the effect of individual agents. Methods: In a prospective cohort of 380 pregnant women from Cincinnati, OH (enrolled 2003â€“2006), we used…	NA	NA	environmental chemical	4,4' isopropylidenediphenol, biological marker, cadmium, organochlorine derivative, organophosphate, perfluoroalkyl substance, phenol (endogenous compound), phthalic acid (endogenous compound), polybrominated diphenyl ether, polychlorinated biphenyl, pyrethroid, tobacco smoke, unclassified drug	maternal exposure, newborn assessment, pregnancy	adolescent, adult, article, birth weight, body height, chemical industry, cohort analysis, concentration (parameter), controlled study, female, gestational age, head circumference, human, infant, k means clustering, metabolite, newborn, pregnancy outcome, pregnant woman, priority journal, prospective study, scoring system, structure analysis, time	NA	NA	NA	NA
n020	nPM020	31394346	Association between perfluoroalkyl substance concentrations and blood pressure in adolescents	Ma S, Xu C, Ma J, Wang Z, Zhang Y, Shu Y, Mo X.	Environ Pollut. 2019 Nov;254(Pt A):112971. doi: 10.1016/j.envpol.2019.112971. Epub 2019 Jul 30.	Ma S	Environ Pollut	2019	2019-08-09	NA	NA	10.1016/j.envpol.2019.112971	TRUE	nEm251	Association between perfluoroalkyl substance concentrations and blood pressure in adolescents	NA	Ma S., Xu C., Ma J., Wang Z., Zhang Y., Shu Y., Mo X.	(Ma S.; Xu C.; Ma J.; Wang Z.; Zhang Y.; Shu Y.; Mo X., mohsuming15@sina.com) Department of Cardiothoracic Surgery, Children's Hospital of Nanjing Medical University, Nanjing, China.	X. Mo, Department of Cardiothoracic Surgery, Children's Hospital of Nanjing Medical University, 72 Guangzhou Road, Nanjing, China. Email: mohsuming15@sina.com	NA	2019-08-14	2019-08-14	Environmental Pollution (2019) 254 Article Number: 112971. Date of Publication: 1 Nov 2019	Environmental Pollution	2019	254	NA	NA	NA	2019-11-01	Article	NA	NA	NA	NA	1873-6424 (electronic),0269-7491	NA	Elsevier Ltd	The effects of exposure to some environmental chemicals on blood pressure have been determined, but the association between non-occupational exposure to perfluoroalkyl substances (PFASs) and blood pressure in adolescents remains unknown. The association between blood pressure and PFAS concentrations was studied by analysing data from 2251 participants filtered from the population enrolled in the …	Low-dose exposure to PFOS is positively related to elevated diastolic blood pressure in male adolescents.	Adolescents,Blood pressure,NHANES,Perfluorooctane sulfonic acid	organofluorine derivative, perfluoroalkyl derivative	cotinine, perfluorooctanesulfonic acid, unclassified drug	diastolic blood pressure	adolescent, age, article, blood level, body mass, calcium intake, caloric intake, cohort analysis, confidence interval, controlled study, correlation coefficient, epidemiological data, female, gender, human, male, potassium intake, race, regression analysis, sampling, sex difference, sodium intake, statistical model	NA	NA	NA	NA
n021	nPM021	33126064	Hexafluoropropylene oxide-dimer acid (HFPO-DA or GenX) alters maternal and fetal glucose and lipid metabolism and produces neonatal mortality, low birthweight, and hepatomegaly in the Sprague-Dawley rat	Conley JM, Lambright CS, Evans N, McCord J, Strynar MJ, Hill D, Medlock-Kakaley E, Wilson VS, Gray LE Jr.	Environ Int. 2021 Jan;146:106204. doi: 10.1016/j.envint.2020.106204. Epub 2020 Oct 27.	Conley JM	Environ Int	2021	2020-10-30	PMC7775906	NIHMS1644552	10.1016/j.envint.2020.106204	TRUE	nEm166	Hexafluoropropylene oxide-dimer acid (HFPO-DA or GenX) alters maternal and fetal glucose and lipid metabolism and produces neonatal mortality, low birthweight, and hepatomegaly in the Sprague-Dawley rat	NA	Conley J.M., Lambright C.S., Evans N., McCord J., Strynar M.J., Hill D., Medlock-Kakaley E., Wilson V.S., Gray L.E.	(Conley J.M., conley.justin@epa.gov; Lambright C.S., lambright.christy@epa.gov; Evans N., evans.nicola@epa.gov; Hill D., hill.donna@epa.gov; Medlock-Kakaley E., medlockkakaley.elizabeth@epa.gov; Wilson V.S., wilson.vickie@epa.gov; Gray L.E., gray.earl@epa.gov) U.S. Environmental Protection Agency/Office of Research & Development/Center for Public Health and Environmental Assessment, Research Tria…	J.M. Conley, 109 TW Alexander Drive, Research Triangle Park, NC, United States. Email: conley.justin@epa.gov	NA	2020-11-04	2021-01-15	Environment International (2021) 146 Article Number: 106204. Date of Publication: 1 Jan 2021	Environment International	2021	146	NA	NA	NA	2021-01-01	Article	NA	NA	NA	NA	1873-6750 (electronic),0160-4120	NA	Elsevier Ltd	Hexafluoropropylene oxide dimer acid (HFPO-DA or GenX) is an industrial replacement for the straight-chain perfluoroalkyl substance (PFAS), perfluorooctanoic acid (PFOA). Previously we reported maternal, fetal, and postnatal effects from gestation day (GD) 14-18 oral dosing in Sprague-Dawley rats. Here, we further evaluated the perinatal toxicity of HFPO-DA by orally dosing rat dams with 1â€“125 …	NA	Developmental toxicity,Glucose metabolism,In utero exposure,Low birthweight,Peroxisome proliferator-activated receptor,PFAS	hexafluoropropylene oxide dimer acid (drug toxicity), industrial chemical (drug toxicity)	glycogen (endogenous compound), lipid (endogenous compound), perfluorooctanesulfonic acid (drug toxicity), perfluorooctanoic acid (drug toxicity), peroxisome proliferator activated receptor (endogenous compound), thyroid hormone (endogenous compound), unclassified drug	birth weight, glucose metabolism, hepatomegaly, lipid metabolism, newborn mortality, perinatal toxicity, Sprague Dawley rat	animal experiment, animal model, article, clearance, concentration (parameter), controlled study, exposure, female, fetus, gene expression, gene function, gene mutation, genetic analysis, gestational age, gestational weight gain, histopathology, hypoglycemia, lipid blood level, liver level, liver weight, male, maternal serum, newborn, nonhuman, priority journal, pup (rodent), rat, thyroid hormone…	NA	NA	NA	NA
n022	nPM022	34766696	Prenatal exposure to persistent organic pollutants and childhood obesity: A systematic review and meta-analysis of human studies	Stratakis N, Rock S, La Merrill MA, Saez M, Robinson O, Fecht D, Vrijheid M, Valvi D, Conti DV, McConnell R, Chatzi VL.	Obes Rev. 2022 Jan;23 Suppl 1(Suppl 1):e13383. doi: 10.1111/obr.13383. Epub 2021 Nov 12.	Stratakis N	Obes Rev	2022	2021-11-12	PMC9512275	NIHMS1835277	10.1111/obr.13383	TRUE	nEm062	Prenatal exposure to persistent organic pollutants and childhood obesity: A systematic review and meta-analysis of human studies	NA	Stratakis N., Rock S., La Merrill M.A., Saez M., Robinson O., Fecht D., Vrijheid M., Valvi D., Conti D.V., McConnell R., Chatzi V.L.	(Stratakis N., nstratak@usc.edu; Rock S.; Conti D.V.; McConnell R.; Chatzi V.L.) Department of Preventive Medicine, Keck School of Medicine, University of Southern California, Los Angeles, CA, United States. , (La Merrill M.A.) Department of Environmental Toxicology, University of California, Davis, CA, United States. , (Saez M.) Research Group on Statistics, Econometrics and Health (GRECS), Univ…	N. Stratakis, Department of Preventive Medicine, Keck School of Medicine, University of Southern California, Los Angeles, CA, United States. Email: nstratak@usc.edu	NA	2021-11-16	2022-02-15	Obesity Reviews (2022) 23:S1 Article Number: e13383. Date of Publication: 1 Jan 2022	Obesity Reviews	2022	23	S1	NA	NA	2022-01-01	Article	NA	NA	NA	NA	1467-789X (electronic),1467-7881	NA	John Wiley and Sons Inc	We conducted a systematic review and meta-analysis of the associations between prenatal exposure to persistent organic pollutants (POPs) and childhood obesity. We focused on organochlorines (dichlorodiphenyltrichloroethane [DDT], dichlorodiphenyldichloroethylene [DDE], hexachlorobenzene [HCB], and polychlorinated biphenyls [PCBs]), perfluoroalkyl and polyfluoroalkyl substances (PFAS), and polybro…	NA	NA	NA	2,2',4,4' tetrabromodiphenyl ether, 2,2',4,4',5,5' hexabromodiphenyl ether, 2,2',4,4',5,5' hexachlorobiphenyl, chlorphenotane, hexachlorobenzene, organochlorine derivative, polybrominated diphenyl ether, polychlorinated biphenyl	childhood obesity, persistent organic pollutant, prenatal exposure	abdominal obesity, article, biological monitoring, body fat, body height, body mass, child, child growth, gestational age, human, meta analysis, outcome assessment, pregnancy outcome, sex difference, systematic review, waist circumference	NA	NA	NA	NA
n023	nPM023	33383424	Profiling of emerging and legacy per-/polyfluoroalkyl substances in serum among pregnant women in China	Liu J, Gao X, Wang Y, Leng J, Li J, Zhao Y, Wu Y.	Environ Pollut. 2021 Feb 15;271:116376. doi: 10.1016/j.envpol.2020.116376. Epub 2020 Dec 22.	Liu J	Environ Pollut	2021	2020-12-31	NA	NA	10.1016/j.envpol.2020.116376	TRUE	nEm150	Profiling of emerging and legacy per-/polyfluoroalkyl substances in serum among pregnant women in China	NA	Liu J., Gao X., Wang Y., Leng J., Li J., Zhao Y., Wu Y.	(Liu J.) Laboratory for Earth Surface Processes, College of Urban and Environmental Sciences, Peking University, Beijing, China. , (Gao X.; Wang Y., wangyx@cfsa.net.cn; Li J.; Zhao Y.; Wu Y.) NHC Key Laboratory of Food Safety Risk Assessment, Chinese Academy of Medical Science Research Unit (No. 2019RU014), China National Center for Food Safety Risk Assessment, 7 Panjiayuannanli, Beijing, China. …	Y. Wang, NHC Key Laboratory of Food Safety Risk Assessment, Chinese Academy of Medical Science Research Unit (No. 2019RU014), China National Center for Food Safety Risk Assessment, 7 Panjiayuannanli, Beijing, China. Email: wangyx@cfsa.net.cn	NA	2021-01-08	2021-04-29	Environmental Pollution (2021) 271 Article Number: 116376. Date of Publication: 15 Feb 2021	Environmental Pollution	2021	271	NA	NA	NA	2021-02-15	Article	NA	NA	NA	NA	1873-6424 (electronic),0269-7491	NA	Elsevier Ltd	Profiling of emerging and legacy PFASs indicated a relatively high exposure to 6:2Cl-PFESA among pregnant women and a geographic difference of 6:2Cl-PFESA/PFOS ratio in China.	Emerging per-/polyfluoroalkyl substances (PFASs), such as chlorinated polyfluorinated ether sulfonates (Cl-PFESAs), have been detected in human samples, yet investigation on their occurrence in pregnant women remains limited. Herein, ten legacy PFASs, branched perfluorooctanesulfonate (PFOS) and perfluorooctanoate (PFOA), two Cl-PFESAs, perfluoro-2-propoxypropanoic acid (HFPO-DA), and ammonium 4,…	ADONA,Cl-PFESAs,HFPO-DA,Human serum,Pregnant women	organofluorine derivative, perfluoroalkyl substance, polyfluoroalkyl substance	ammonium 4,8 dioxa 3h perfluorononanoate, chlorinated polyfluorinated ethersulfonate, perfluoro 2 propoxypropanoic acid, perfluoroalkylcarboxylate, perfluoroalkylsulfonate, perfluorooctanesulfonic acid, perfluorooctanoic acid, perfluoropentanesulfonate, unclassified drug	maternal exposure, pregnancy	age, article, body mass, China, controlled study, female, human, multipara, parity	NA	NA	NA	NA
n024	nPM024	33751201	Urogynecology in obstetrics: impact of pregnancy and delivery on pelvic floor disorders, a prospective longitudinal observational pilot study	Stroeder R, Radosa J, Clemens L, Gerlinger C, Schmidt G, Sklavounos P, Takacs Z, Meyberg-Solomayer G, Solomayer EF, Hamza A.	Arch Gynecol Obstet. 2021 Aug;304(2):401-408. doi: 10.1007/s00404-021-06022-w. Epub 2021 Mar 22.	Stroeder R	Arch Gynecol Obstet	2021	2021-03-22	PMC8277616	NA	10.1007/s00404-021-06022-w	TRUE	nEm113	Urogynecology in obstetrics: impact of pregnancy and delivery on pelvic floor disorders, a prospective longitudinal observational pilot study	NA	Stroeder R., Radosa J., Clemens L., Gerlinger C., Schmidt G., Sklavounos P., Takacs Z., Meyberg-Solomayer G., Solomayer E.-F., Hamza A.	(Stroeder R., russalina.stroeder@uks.eu; Radosa J.; Clemens L.; Gerlinger C.; Schmidt G.; Sklavounos P.; Takacs Z.; Meyberg-Solomayer G.; Solomayer E.-F.; Hamza A.) Department of Gynecology, Obstetrics and Reproductive Medicine, University Medical School of Saarland, Kirrberger StraÃŸe, Homburg, Saar, Germany. , (Hamza A.) Department of Obstetrics and Prenatal Medicine, Kantonspital Baden, Im Erg…	R. Stroeder, Department of Gynecology, Obstetrics and Reproductive Medicine, University Medical School of Saarland, Kirrberger StraÃŸe, Homburg, Saar, Germany. Email: russalina.stroeder@uks.eu	NA	2021-03-26	2022-03-07	Archives of Gynecology and Obstetrics (2021) 304:2 (401-408). Date of Publication: 1 Aug 2021	Archives of Gynecology and Obstetrics	2021	304	2	401	408	2021-08-01	Article	NA	NA	NA	NA	1432-0711 (electronic),0932-0067	NA	Springer Science and Business Media Deutschland GmbH	Purpose: To assess changes in the pelvic floor anatomy that cause pelvic floor disorders (PFDs) in primigravidae during and after pregnancy and to evaluate their impact on womenâ€™s quality of life (QoL). Methods: POP-Q and translabial ultrasound examination was performed in the third trimester and 3 months after delivery in a cohort of primigravidae with singleton pregnancy delivering in a terti…	NA	Pelvic floor disorders,POP-Q,Preventive treatment strategies,Quality of life,Translabial ultrasound	NA	NA	obstetric delivery, pelvic floor disorder (prevention, therapy)	adult, article, bladder neck, cesarean section, clinical article, cohort analysis, connective tissue, female, fetus weight, gynecology, human, longitudinal study, observational study, pelvic floor muscle training, pelvis floor, pilot study, primigravida, prophylaxis, prospective study, puerperium, quality of life, risk factor, sexual intercourse, third trimester pregnancy, translabial ultrasound,…	NA	NA	NA	NA
n025	nPM025	34403666	Correlates of plasma concentrations of per- and poly-fluoroalkyl substances among reproductive-aged Black women	Wise LA, Wesselink AK, Schildroth S, Calafat AM, Bethea TN, Geller RJ, Coleman CM, Fruh V, Claus Henn B, Botelho JC, Harmon QE, Thirkill M, Wegienka GR, Baird DD.	Environ Res. 2022 Jan;203:111860. doi: 10.1016/j.envres.2021.111860. Epub 2021 Aug 14.	Wise LA	Environ Res	2022	2021-08-17	PMC8616815	NIHMS1734122	10.1016/j.envres.2021.111860	TRUE	nEm063	Correlates of plasma concentrations of per- and poly-fluoroalkyl substances among reproductive-aged Black women	NA	Wise L.A., Wesselink A.K., Schildroth S., Calafat A.M., Bethea T.N., Geller R.J., Coleman C.M., Fruh V., Claus Henn B., Botelho J.C., Harmon Q.E., Thirkill M., Wegienka G.R., Baird D.D.	(Wise L.A., lwise@bu.edu; Wesselink A.K.; Geller R.J.; Coleman C.M.; Thirkill M.) Department of Epidemiology, Boston University School of Public Health, Boston, MA, United States. , (Schildroth S.; Fruh V.; Claus Henn B.) Department of Environmental Health, Boston University School of Public Health, Boston, MA, United States. , (Calafat A.M.; Botelho J.C.) Division of Laboratory Sciences, Centers…	L.A. Wise, 715 Albany Street, Boston, MA, United States. Email: lwise@bu.edu	NA	2021-09-10	2021-09-21	Environmental Research (2022) 203 Article Number: 111860. Date of Publication: 1 Jan 2022	Environmental Research	2022	203	NA	NA	NA	2022-01-01	Article	NA	NA	NA	NA	1096-0953 (electronic),0013-9351	NA	Academic Press Inc.	Background: Per- and polyfluoroalkyl substances (PFAS) are synthetic chemicals used in commercial and consumer goods. Black women are underrepresented in studies of PFAS exposure. Methods: We performed a cross-sectional analysis of correlates of plasma PFAS concentrations among 1499 Black women aged 23â€“35 participating in the Study of Environment, Lifestyle, and Fibroids (SELF), a Detroit-based…	NA	Correlates,Environmental chemicals,Females,per- and polyfluoroalkyl substances,Prospective studies,Race	alkyl group, fluorine derivative, perfluoroalkyl substance, polyfluoroalkyl substance	2 n methyl perfluorooctane sulfonamido acetate, decanoic acid derivative, medroxyprogesterone acetate, perfluorodecanoate, perfluorohexanesulfonic acid, perfluorononanoic acid, perfluorooctane, perfluorooctanesulfonic acid, perfluorooctanoic acid, perfluoroundecanoic acid, unclassified drug	blood level	adult, age, alcohol consumption, article, Black person, body mass, breast feeding, cohort analysis, controlled study, cross-sectional study, educational status, female, fluid intake, human, income, major clinical study, menstruation, parity, sea food, smoking	NA	NA	NA	NA
n026	nPM026	33465343	Prenatal exposure to endocrine disrupting chemical mixtures and infant birth weight: A Bayesian analysis using kernel machine regression	Hu JMY, Arbuckle TE, Janssen P, Lanphear BP, Zhuang LH, Braun JM, Chen A, McCandless LC.	Environ Res. 2021 Apr;195:110749. doi: 10.1016/j.envres.2021.110749. Epub 2021 Jan 17.	Hu JMY	Environ Res	2021	2021-01-19	NA	NA	10.1016/j.envres.2021.110749	TRUE	nEm140	Prenatal exposure to endocrine disrupting chemical mixtures and infant birth weight: A Bayesian analysis using kernel machine regression	NA	Hu J.M.Y., Arbuckle T.E., Janssen P., Lanphear B.P., Zhuang L.H., Braun J.M., Chen A., McCandless L.C.	(Hu J.M.Y., mungh@sfu.ca; Lanphear B.P.; Zhuang L.H.; McCandless L.C.) Faculty of Health Sciences, Simon Fraser University, BC V5A 1S6, Burnaby, Canada. , (Arbuckle T.E.) Population Studies Division, Environmental Health Science and Research Bureau, Healthy Environments and Consumer Safety Branch, Health Canada, Ottawa, ON, Canada. , (Janssen P.) School of Population and Public Health, University…	J.M.Y. Hu, Faculty of Health Sciences, Simon Fraser University, University Drive, BC V5A 1S6, Burnaby, Canada. Email: mungh@sfu.ca	NA	2021-02-08	2021-03-09	Environmental Research (2021) 195 Article Number: 110749. Date of Publication: 1 Apr 2021	Environmental Research	2021	195	NA	NA	NA	2021-04-01	Article	NA	NA	NA	NA	1096-0953 (electronic),0013-9351	NA	Academic Press Inc.	Background: Pregnant women are regularly exposed to a multitude of endocrine disrupting chemicals (EDCs). EDC exposures, both individually and as mixtures, may affect fetal growth. The relationship of EDC mixtures with infant birth weight, however, remains poorly understood. We examined the relations between prenatal exposure to EDC mixtures and infant birth weight. Methods: We used data from the…	NA	Bayesian kernel machine regression (BKMR),Birth weight,Chemical mixtures,Endocrine disrupting chemicals,Fetal growth	endocrine disruptor	lead, metal, nonachlor, organochlorine derivative, phenol derivative, phthalic acid, serpacwa	Bayes theorem, birth weight, kernel method, prenatal exposure	adult, article, blood sampling, cohort analysis, comparative study, female, first trimester pregnancy, human, human experiment, infant, linear regression analysis, male, priority journal, secondary analysis, urine sampling	NA	NA	NA	NA
n027	nPM027	34134420	Developmental effects of PFOS, PFOA and GenX in a 3D human induced pluripotent stem cell differentiation model	Davidsen N, Rosenmai AK, Lauschke K, Svingen T, Vinggaard AM.	Chemosphere. 2021 Sep;279:130624. doi: 10.1016/j.chemosphere.2021.130624. Epub 2021 Apr 22.	Davidsen N	Chemosphere	2021	2021-06-17	NA	NA	10.1016/j.chemosphere.2021.130624	TRUE	nEm096	Developmental effects of PFOS, PFOA and GenX in a 3D human induced pluripotent stem cell differentiation model	NA	Davidsen N., Rosenmai A.K., Lauschke K., Svingen T., Vinggaard A.M.	(Davidsen N.; Rosenmai A.K.; Lauschke K.; Svingen T.; Vinggaard A.M., annv@food.dtu.dk) National Food Institute, Technical University of Denmark, Kgs. Lyngby DK, Denmark.	A.M. Vinggaard, National Food Institute, Technical University of Denmark, Kgs. Lyngby DK, Denmark. Email: annv@food.dtu.dk	NA	2021-05-11	2021-08-06	Chemosphere (2021) 279 Article Number: 130624. Date of Publication: 1 Sep 2021	Chemosphere	2021	279	NA	NA	NA	2021-09-01	Article	NA	NA	NA	NA	1879-1298 (electronic),0045-6535	NA	Elsevier Ltd	Polyfluoroalkyl substances (PFASs), including perfluorooctanesulfonic acid (PFOS) and perfluorooctanoic acid (PFOA), are persistent pollutants routinely found in human blood. PFASs have been associated with health issues such as decreased birth weight and impaired vaccination response in children. Substitutes to these PFASs, such as ammonium 2,3,3,3-tetrafluoro-2-(heptafluoropropoxy)propanoate (G…	NA	Cardiomyocytes,Developmental toxicology,GenX,hiPSC,PFOA,PFOS	ammonium 2,3,3,3 tetrafluoro 2 (heptafluoropropoxy)propanoate (drug toxicity), ammonium derivative (drug toxicity), perfluorooctanesulfonic acid (drug toxicity), perfluorooctanoic acid (drug toxicity)	biological marker (endogenous compound), messenger RNA (endogenous compound), myh7 protein (endogenous compound), unclassified drug	cell differentiation, embryotoxicity, induced pluripotent stem cell, three dimensional cell culture	'Fiji', article, blastocyst, cardiac muscle cell, Cell Titer Glo 2D, cell viability, cell viability assay kit, concentration (parameter), controlled study, culture medium, cytotoxicity, DMIL LED, DP21, embryo, embryo development, embryoid body, genetic transcription, human, human cell, imaging software, in vitro study, microscope, microscope camera, microwell plate, model, mRNA expression level, …	NA	NA	'Fiji', Cell Titer Glo 2D (Promega, United States), DMIL LED (Leica), DP21 (Olympus), Polystyrene Conical Bottom MicroWell (Thermo), RNeasy Mini Kit (Qiagen)	Fisher, Leica, Olympus, Perkin Elmer (United States), Promega (United States), Qiagen, stemcell technologies (United States), Thermo
n028	nPM028	31830731	Are perfluorooctane sulfonate alternatives safer? New insights from a birth cohort study	Chu C, Zhou Y, Li QQ, Bloom MS, Lin S, Yu YJ, Chen D, Yu HY, Hu LW, Yang BY, Zeng XW, Dong GH.	Environ Int. 2020 Feb;135:105365. doi: 10.1016/j.envint.2019.105365. Epub 2019 Dec 9.	Chu C	Environ Int	2020	2019-12-13	NA	NA	10.1016/j.envint.2019.105365	TRUE	nEm228	Are perfluorooctane sulfonate alternatives safer? New insights from a birth cohort study	NA	Chu C., Zhou Y., Li Q.-Q., Bloom M.S., Lin S., Yu Y.-J., Chen D., Yu H.-Y., Hu L.-W., Yang B.-Y., Zeng X.-W., Dong G.-H.	(Chu C.; Zhou Y.; Li Q.-Q.; Bloom M.S.; Yu H.-Y.; Hu L.-W.; Yang B.-Y.; Zeng X.-W.; Dong G.-H., donggh5@mail.sysu.edu.cn) Guangdong Provincial Engineering Technology Research Center of Environmental Pollution and Health Risk Assessment, Department of Occupational and Environmental Health, School of Public Health, Sun Yat-sen University, Guangzhou, China. , (Bloom M.S.; Lin S.) Departments of Envi…	G.-H. Dong, Guangdong Provincial Engineering Technology Research Center of Environmental Pollution and Health Risk Assessment, Department of Occupational and Environmental Health, School of Public Health, Sun Yat-sen University, 74 Zhongshan 2nd Road, Yuexiu District, Guangzhou, China. Email: donggh5@mail.sysu.edu.cn	NA	2019-12-17	2020-12-11	Environment International (2020) 135 Article Number: 105365. Date of Publication: 1 Feb 2020	Environment International	2020	135	NA	NA	NA	2020-02-01	Article	NA	NA	NA	NA	1873-6750 (electronic),0160-4120	NA	Elsevier Ltd	Background: Experimental studies show that chlorinated polyfluorinated ether sulfonic acids (Cl-PFESA 6:2 and 8:2), one of perfluoroalkyl substances (PFAS) used as perfluorooctane sulfonate (PFOS) alternatives, are reproductive toxicants in vivo and in vitro. However, the associations between gestational exposure to Cl-PFESAs and birth outcomes are unknown. Objectives: We investigated association…	NA	6:2 Cl-PFESA,8:2 Cl-PFESA,Birth weight,Perfluorooctane sulfonate (PFOS) alternatives,Preterm birth	perfluorooctanesulfonic acid	perfluoroalkanoic acid, perfluorooctanoic acid	maternal exposure	adult, article, clinical assessment, clinical feature, cohort analysis, concentration (parameter), concentration ratio, controlled study, disease association, epidemiological data, female, gestation period, gestational age, high risk patient, household economic status, human, low birth weight, maternal serum, medical record review, newborn, pregnancy outcome, premature labor, prenatal care, prior…	NA	NA	NA	NA
n029	nPM029	33223205	PFAS exposure and overweight/obesity among children in a nationally representative sample	Geiger SD, Yao P, Vaughn MG, Qian Z.	Chemosphere. 2021 Apr;268:128852. doi: 10.1016/j.chemosphere.2020.128852. Epub 2020 Nov 3.	Geiger SD	Chemosphere	2021	2020-11-23	NA	NA	10.1016/j.chemosphere.2020.128852	TRUE	nEm137	PFAS exposure and overweight/obesity among children in a nationally representative sample	NA	Geiger S.D., Yao P., Vaughn M.G., Qian Z.	(Geiger S.D., smurphy7@illinois.edu) Department of Kinesiology and Community Health, College of Applied Health Sciences, University of Illinois at Urbana-Champaign, Urbana, IL, United States. , (Geiger S.D., smurphy7@illinois.edu) Beckman Institute for Advanced Science and Technology, University of Illinois at Urbana-Champaign, Urbana, IL, United States. , (Yao P., pyao@niu.edu) School of Health …	S.D. Geiger, Department of Kinesiology and Community Health, University of Illinois at Urbana-Champaign, 1206 S Fourth St, Champaign, IL, United States. Email: smurphy7@illinois.edu	NA	2020-11-30	2021-05-21	Chemosphere (2021) 268 Article Number: 128852. Date of Publication: 1 Apr 2021	Chemosphere	2021	268	NA	NA	NA	2021-04-01	Article	NA	NA	NA	NA	1879-1298 (electronic),0045-6535	NA	Elsevier Ltd	Purpose: Perfluoroalkyl substances (PFASs) are a class of manmade chemicals commonly used in consumer product manufacturing. Perfluorooctanoic acid (PFOA) and perfluorooctane sulfonate (PFOS) are two of the most highly studied PFASs. Both are present in the blood of the most Americans. PFASs are associated with intermediate cardiovascular disease (CVD) outcomes, but their relationship with obesit…	NA	NA	perfluorooctanesulfonic acid (endogenous compound), perfluorooctanoic acid (endogenous compound)	NA	abdominal obesity (etiology), childhood obesity (etiology)	adolescent, adult, age, blood level, body mass, child, controlled study, female, human, major clinical study, male, public health service, race, sex, waist circumference	NA	NA	NA	NA
n030	nPM030	35097227	Latent, sex-specific metabolic health effects in CD-1 mouse offspring exposed to PFOA or HFPO-DA (GenX) during gestation	Cope HA, Blake BE, Love C, McCord J, Elmore SA, Harvey JB, Chappell VA, Fenton SE.	Emerg Contam. 2021;7:219-235. doi: 10.1016/j.emcon.2021.10.004. Epub 2021 Oct 31.	Cope HA	Emerg Contam	2021	2022-01-31	PMC8794304	NIHMS1770357	10.1016/j.emcon.2021.10.004	FALSE	NA	NA	NA	NA	NA	NA	NA	NA	NA	NA	NA	NA	NA	NA	NA	NA	NA	NA	NA	NA	NA	NA	NA	NA	NA	NA	NA	NA	NA	NA	NA	NA	NA	NA	NA	NA
n031	nPM031	34952357	Developmental toxicity of Nafion byproduct 2 (NBP2) in the Sprague-Dawley rat with comparisons to hexafluoropropylene oxide-dimer acid (HFPO-DA or GenX) and perfluorooctane sulfonate (PFOS)	Conley JM, Lambright CS, Evans N, Medlock-Kakaley E, Hill D, McCord J, Strynar MJ, Wehmas LC, Hester S, MacMillan DK, Gray LE Jr.	Environ Int. 2022 Feb;160:107056. doi: 10.1016/j.envint.2021.107056. Epub 2021 Dec 22.	Conley JM	Environ Int	2022	2021-12-24	PMC8821375	NIHMS1771516	10.1016/j.envint.2021.107056	TRUE	nEm059	Developmental toxicity of Nafion byproduct 2 (NBP2) in the Sprague-Dawley rat with comparisons to hexafluoropropylene oxide-dimer acid (HFPO-DA or GenX) and perfluorooctane sulfonate (PFOS)	NA	Conley J.M., Lambright C.S., Evans N., Medlock-Kakaley E., Hill D., McCord J., Strynar M.J., Wehmas L.C., Hester S., MacMillan D.K., Gray L.E.	(Conley J.M., conley.justin@epa.gov; Lambright C.S., lambright.christy@epa.gov; Evans N., evans.nicola@epa.gov; Medlock-Kakaley E., medlockkakaley.elizabeth@epa.gov; Hill D., hill.donna@epa.gov; Gray L.E., gray.earl@epa.gov) U.S. Environmental Protection Agency/Office of Research & Development/Center for Public Health and Environmental Assessment, Research Triangle Park, NC, United States. , (McC…	J.M. Conley, 109 TW Alexander Drive, Research Triangle Park, NC, United States. Email: conley.justin@epa.gov	NA	2021-12-28	2022-01-05	Environment International (2022) 160 Article Number: 107056. Date of Publication: 1 Feb 2022	Environment International	2022	160	NA	NA	NA	2022-02-01	Article	NA	NA	NA	NA	1873-6750 (electronic),0160-4120	NA	Elsevier Ltd	Nafion byproduct 2 (NBP2) is a polyfluoroalkyl ether sulfonic acid that was recently detected in surface water, drinking water, and human serum samples from monitoring studies in North Carolina, USA. We orally exposed pregnant Sprague-Dawley rats to NBP2 from gestation day (GD) 14â€“18 (0.1â€“30 mg/kg/d), GD17-21, and GD8 to postnatal day (PND) 2 (0.3â€“30 mg/kg/d) to characterize maternal, fetal…	NA	Developmental toxicity,Gene expression,Liver toxicity,Metabolomics,PFAS,Pregnancy	ether (drug toxicity, special situation for pharmacovigilance), hexafluoropropylene oxide dimer acid (drug toxicity, special situation for pharmacovigilance), nafion byproduct 2 (drug toxicity, special situation for pharmacovigilance), perfluorooctanesulfonic acid (drug toxicity, special situation for pharmacovigilance), propylene oxide (drug toxicity, special situation for pharmacovigilance)	bile acid (endogenous compound), carbohydrate (endogenous compound), cholesterol (endogenous compound), glycogen (endogenous compound), indolepropionic acid (endogenous compound), liothyronine (endogenous compound), lipid (endogenous compound), thyroid hormone (endogenous compound), unclassified drug	developmental toxicity	adult, animal cell, animal experiment, animal tissue, article, body weight, carbohydrate metabolism, comparative study, controlled study, female, fetus, gene, gene expression, histopathology, infant, lipid metabolism, liver cell, liver hypertrophy, liver toxicity, male, metabolomics, newborn, newborn mortality, nonhuman, progeny, pup (rodent), rat, Sprague Dawley rat, stillbirth, survival, transc…	NA	NA	NA	NA
n032	nPM032	36436258	Transcriptional pathways linked to fetal and maternal hepatic dysfunction caused by gestational exposure to perfluorooctanoic acid (PFOA) or hexafluoropropylene oxide-dimer acid (HFPO-DA or GenX) in CD-1 mice	Blake BE, Miller CN, Nguyen H, Chappell VA, Phan TP, Phadke DP, Balik-Meisner MR, Mav D, Shah RR, Fenton SE.	Ecotoxicol Environ Saf. 2022 Dec 15;248:114314. doi: 10.1016/j.ecoenv.2022.114314. Epub 2022 Nov 24.	Blake BE	Ecotoxicol Environ Saf	2022	2022-11-27	PMC9742811	NIHMS1854750	10.1016/j.ecoenv.2022.114314	TRUE	nEm001	Transcriptional pathways linked to fetal and maternal hepatic dysfunction caused by gestational exposure to perfluorooctanoic acid (PFOA) or hexafluoropropylene oxide-dimer acid (HFPO-DA or GenX) in CD-1 mice	NA	Blake B.E., Miller C.N., Nguyen H., Chappell V.A., Phan T.P., Phadke D.P., Balik-Meisner M.R., Mav D., Shah R.R., Fenton S.E.	(Blake B.E., blake.bevin@epa.gov) Chemical and Pollutant Assessment Division, Center for Public Health and Environmental Assessment, Office of Research and Development, US Environmental Protection Agency, Research Triangle Park, NC, United States. , (Blake B.E., blake.bevin@epa.gov; Chappell V.A.; Phan T.P.; Fenton S.E.) Mechanistic Toxicology Branch, Division of the National Toxicology Program, …	B.E. Blake, U.S. Environmental Protection Agency, Center for Public Health and Environmental Assessment, Chemical and Pollutant Assessment Division 109 T.W. Alexander Drive, RTP, NC, . Email: blake.bevin@epa.gov	NA	2022-11-29	NA	Ecotoxicology and Environmental Safety (2022) 248 Article Number: 114314. Date of Publication: 15 Dec 2022	Ecotoxicology and Environmental Safety	2022	248	NA	NA	NA	2022-12-15	Article	NA	NA	NA	NA	1090-2414 (electronic),0147-6513	NA	Academic Press	Per- and polyfluoroalkyl substances (PFAS) comprise a diverse class of chemicals used in industrial processes, consumer products, and fire-fighting foams which have become environmental pollutants of concern due to their persistence, ubiquity, and associations with adverse human health outcomes, including in pregnant persons and their offspring. Multiple PFAS are associated with adverse liver out…	NA	Animal models,Developmental exposure,Emerging contaminants,Liver disease,PFAS	dimer, oxide, perfluorooctanoic acid, unclassified drug	transcriptome	CD-1 mouse, fetus liver, genetic transcription, liver disease, liver dysfunction, prenatal exposure	adipogenesis, adult, animal experiment, animal model, article, bile acid metabolism, controlled study, correlation analysis, differential gene expression, drug toxicity, fatty acid metabolism, female, fetus, gene expression, liver toxicity, low drug dose, mouse, nonhuman, oral drug administration, oxidative phosphorylation, peroxisome, phenotype, pregnancy, relative liver weight	NA	NA	NA	NA
n033	nPM033	31295347	Postpartum Fitness and Body Mass Index Changes in Active Duty Navy Women	Rogers AE, Khodr ZG, Bukowinski AT, Conlin AMS, Faix DJ, Garcia SMS.	Mil Med. 2020 Feb 12;185(1-2):e227-e234. doi: 10.1093/milmed/usz168.	Rogers AE	Mil Med	2020	2019-07-12	NA	NA	10.1093/milmed/usz168	TRUE	nEm224	Postpartum Fitness and Body Mass Index Changes in Active Duty Navy Women	NA	Rogers A.E., Khodr Z.G., Bukowinski A.T., Conlin A.M.S., Faix D.J., Garcia S.M.S.	(Rogers A.E.; Garcia S.M.S.) Preventive Medicine and Biostatistics Department, Uniformed Services University of the Health Sciences, 4301 Jones Bridge Road, Bethesda, United States. , (Khodr Z.G.; Bukowinski A.T.; Conlin A.M.S.; Faix D.J.) Deployment Health Research Department, Military Population Health Directorate, Naval Health Research Center, 140 Sylvester Road, San Diego, CA 92106, (Khodr Z.…	NA	NA	NA	2019-08-01	Military medicine (2020) 185:1-2 (e227-e234). Date of Publication: 12 Feb 2020	Military medicine	2020	185	2023-01-02	e227	e234	2020-02-12	Article	NA	NA	NA	NA	1930-613X (electronic)	NA	NLM (Medline)	INTRODUCTION: Active duty Navy women participate in biannual Physical Fitness Assessments (PFAs), which include height and weight measurements and a Physical Readiness Test (PRT). PFAs are waived during pregnancy and resume the cycle after 6 months following maternity leave. The purpose of this study was to compare changes in PFA results over time between women who had or did not have a live birt…	NA	DoD Birth and Infant Health Research program,Navy women,physical readiness test,postpartum weight retention,pregnancy	NA	NA	exercise, puerperium	adult, body mass, female, fitness, human, longitudinal study, pregnancy, young adult	NA	NA	NA	NA
n034	nPM034	33460636	Exposure to perfluoroalkyl substances (PFAS) and dyslipidemia, hypertension and obesity in adolescents. The Fit Futures study	Averina M, Brox J, Huber S, Furberg AS.	Environ Res. 2021 Apr;195:110740. doi: 10.1016/j.envres.2021.110740. Epub 2021 Jan 15.	Averina M	Environ Res	2021	2021-01-18	NA	NA	10.1016/j.envres.2021.110740	TRUE	nEm139	Exposure to perfluoroalkyl substances (PFAS) and dyslipidemia, hypertension and obesity in adolescents. The Fit Futures study	NA	Averina M., Brox J., Huber S., Furberg A.-S.	(Averina M., maria.averina@unn.no; Brox J.; Huber S.) Department of Laboratory Medicine, University Hospital of North Norway, TromsÃ¸, Norway. , (Averina M., maria.averina@unn.no) Department of Community Medicine, UiT the Arctic University of Norway, TromsÃ¸, Norway. , (Furberg A.-S.) Department of Microbiology and Infection Control, University Hospital of North Norway, TromsÃ¸, Norway. , (Furber…	M. Averina, Department of Laboratory Medicine, University Hospital of North Norway, TromsÃ¸, Norway. Email: maria.averina@unn.no	NA	2021-02-08	2021-05-18	Environmental Research (2021) 195 Article Number: 110740. Date of Publication: 1 Apr 2021	Environmental Research	2021	195	NA	NA	NA	2021-04-01	Article	NA	NA	NA	NA	1096-0953 (electronic),0013-9351	NA	Academic Press Inc.	Background: Prevalence of obesity, hypertension and dyslipidemia has been increasing in children and adolescents worldwide. Exposure to environmental pollutants may contribute to this development. Our aim was to study associations between perfluoroalkyl substances (PFAS) and dyslipidemia, hypertension and obesity in a population-based sample of adolescents. Methods: Serum PFAS concentrations were…	NA	Cardiovascular risk factors,Dyslipidemia,Hypertension,Obesity,PFAS	perfluoro compound (drug toxicity)	apolipoprotein B (endogenous compound), low density lipoprotein cholesterol (endogenous compound), perfluorodecanoic acid (drug toxicity), perfluorohexanesulfonic acid (drug toxicity), perfluorononanoic acid (drug toxicity), perfluorooctanesulfonic acid (drug toxicity), perfluorooctanoic acid (drug toxicity), perfluoroundecanoic acid (drug toxicity)	adolescent obesity, dyslipidemia, environmental exposure, hypertension	Acquity UPLC system, adolescent, article, blood collection tube, body mass, cardiovascular risk factor, cholesterol blood level, controlled study, cross-sectional study, diastolic blood pressure, Dinamap ProCare 300 monitor, female, human, human tissue, Jenix DS 102 Stadiometer, liquid chromatograph, low density lipoprotein cholesterol level, major clinical study, male, mass spectrometer, non inv…	NA	NA	Acquity UPLC system (Waters, United States), Dinamap ProCare 300 monitor (GE Healthcare, Norway), Jenix DS 102 Stadiometer, Xevo TQ-S (Waters, United States)	GE Healthcare (Norway), Becton Dickinson (United States), Waters (United States)
n035	nPM035	34948492	PFAS Concentrations and Cardiometabolic Traits in Highly Exposed Children and Adolescents	Canova C, Di Nisio A, Barbieri G, Russo F, Fletcher T, Batzella E, Dalla Zuanna T, Pitter G.	Int J Environ Res Public Health. 2021 Dec 7;18(24):12881. doi: 10.3390/ijerph182412881.	Canova C	Int J Environ Res Public Health	2021	2021-12-24	PMC8701234	NA	10.3390/ijerph182412881	TRUE	nEm078	Pfas concentrations and cardiometabolic traits in highly exposed children and adolescents	NA	Canova C., Di Nisio A., Barbieri G., Russo F., Fletcher T., Batzella E., Zuanna T.D., Pitter G.	(Canova C., cristina.canova@unipd.it; Barbieri G., giulia.barbieri.1@unipd.it; Batzella E., erich.batzella@unipd.it; Zuanna T.D., teresa.dallazuanna@studenti.unipd.it) Unit of Biostatistics, Epidemiology and Public Health, Department of Cardio-Thoraco-Vascular Sciences and Public Health, University of Padova, Padova, Italy. , (Di Nisio A., andrea.dinisio@unipd.it) Unit of Andrology and Reproducti…	C. Canova, Unit of Biostatistics, Epidemiology and Public Health, Department of Cardio-Thoraco-Vascular Sciences and Public Health, University of Padova, Padova, Italy. Email: cristina.canova@unipd.it	NA	2021-12-10	2021-12-28	International Journal of Environmental Research and Public Health (2021) 18:24 Article Number: 12881. Date of Publication: 1 Dec 2021	International Journal of Environmental Research and Public Health	2021	18	24	NA	NA	2021-12-01	Article	NA	NA	NA	NA	1660-4601 (electronic),1661-7827	NA	MDPI	Background: Residents of a large area of north-eastern Italy were exposed for decades to high concentrations of perfluoroalkyl and polyfluoroalkyl substances (PFAS) via drinking water. Despite the large amount of evidence in adults of a positive association between serum PFAS and metabolic outcomes, studies focusing on children and adolescents are limited. We evaluated the associations between se…	NA	Adolescents,Children,Cholesterol,Generalized additive model (GAM),Lipid profile,Mixture,Perfluoroalkyl substances (PFAS),Weighted quantile sum (WQS) regression	alkyl group, perfluoroalkyl substance	high density lipoprotein cholesterol (endogenous compound), low density lipoprotein cholesterol (endogenous compound), perfluorohexanesulfonic acid, perfluorononanoic acid, perfluorooctanesulfonic acid, perfluorooctanoic acid, triacylglycerol (endogenous compound), unclassified drug	cardiometabolic trait, concentration (parameter), exposure, metabolism	adolescent, adult, article, blood level, body mass, chemical analyzer, child, cholesterol blood level, clinical outcome, Cobas, cross-sectional study, diastolic blood pressure, female, groups by age, high performance liquid chromatograph, human, lipid fingerprinting, male, mass spectrometer, school child, sex difference, systolic blood pressure, triple quadrupole mass spectrometer, UFLC XR 20 Pro…	NA	NA	API 4000 (Sciex), Cobas (Hoffmann La Roche, Germany), UFLC XR 20 Prominence (Shimadzu)	Hoffmann La Roche (Germany), Beckman Coulter (United States), Sciex, Shimadzu
n036	nPM036	34778951	Prevalence and severity of pelvic floor disorders in pregnant and postpartum women	Palmieri S, De Bastiani SS, Degliuomini R, Ruffolo AF, Casiraghi A, Vergani P, Gallo P, Magoga G, Cicuti M, Parma M, Frigerio M; Urogynecology-Pelvic Floor Working Group (GLUP).	Int J Gynaecol Obstet. 2022 Aug;158(2):346-351. doi: 10.1002/ijgo.14019. Epub 2021 Dec 4.	Palmieri S	Int J Gynaecol Obstet	2022	2021-11-15	NA	NA	10.1002/ijgo.14019	TRUE	nEm036	Prevalence and severity of pelvic floor disorders in pregnant and postpartum women	NA	Palmieri S., De Bastiani S.S., Degliuomini R., Ruffolo A.F., Casiraghi A., Vergani P., Gallo P., Magoga G., Cicuti M., Parma M., Frigerio M.	(Palmieri S., stefipalmi89@gmail.com; Vergani P.) Gynaecology Division, Milano-Bicocca University, Milan, Italy. , (De Bastiani S.S.; Degliuomini R.; Ruffolo A.F.; Casiraghi A.) Gynecology Division, Vita-Salute San Raffaele University, Milan, Italy. , (Vergani P.) Obstetric Division, Monza and Brianza Mother and Child Foundation, Monza, Italy. , (Gallo P.) S. Maria delle Grazie Hospital, Pozzuoli…	S. Palmieri, Gynaecology Division, Milano-Bicocca University, Milan, Italy. Email: stefipalmi89@gmail.com	NA	2021-12-08	2022-08-02	International Journal of Gynecology and Obstetrics (2022) 158:2 (346-351). Date of Publication: 1 Aug 2022	International Journal of Gynecology and Obstetrics	2022	158	2	346	351	2022-08-01	Article	NA	NA	NA	NA	1879-3479 (electronic),0020-7292	NA	John Wiley and Sons Ltd	Objective: This multicenter study aimed to evaluate risk factors, prevalence and severity of pelvic floor disorders (PFDs) as well as their consequences on women's emotional well-being, using a questionnaire validated specifically for pregnancy and postpartum. Methods: Prospective study conducted in eight teaching hospitals in Italy and Italian-speaking Switzerland. Pregnant and postpartum women …	NA	pelvic floor,pelvic floor disorders,postpartum,pregnancy,quality of life,women's health	NA	NA	emotional well-being, pelvic floor disorder	adult, article, bladder disease, body mass, cigarette smoking, constipation, disease severity, dyspareunia, enteropathy, feces incontinence, female, human, major clinical study, micturition disorder, multicenter study, parity, pregnancy outcome, pregnant woman, prevalence, prospective study, puerperium, questionnaire, risk factor, sexual dysfunction, sexual function, stress incontinence, third tr…	NA	NA	NA	NA
n037	nPM037	35400049	Association Between Exposure to Per- and Polyfluoroalkyl Substances and Birth Outcomes: A Systematic Review and Meta-Analysis	Gui SY, Chen YN, Wu KJ, Liu W, Wang WJ, Liang HR, Jiang ZX, Li ZL, Hu CY.	Front Public Health. 2022 Mar 24;10:855348. doi: 10.3389/fpubh.2022.855348. eCollection 2022.	Gui SY	Front Public Health	2022	2022-04-11	PMC8988915	NA	10.3389/fpubh.2022.855348	TRUE	nEm072	Association Between Exposure to Per- and Polyfluoroalkyl Substances and Birth Outcomes: A Systematic Review and Meta-Analysis	NA	Gui S.-Y., Chen Y.-N., Wu K.-J., Liu W., Wang W.-J., Liang H.-R., Jiang Z.-X., Li Z.-L., Hu C.-Y.	(Gui S.-Y.; Jiang Z.-X.) Department of Ophthalmology, Second Affiliated Hospital of Anhui Medical University, Hefei, China. , (Gui S.-Y.; Wu K.-J.) Department of Clinical Medicine, Second School of Clinical Medicine, Anhui Medical University, Hefei, China. , (Chen Y.-N.; Wang W.-J.) Department of Pharmacy, School of Clinical Pharmacy, Anhui Medical University, Hefei, China. , (Liu W.) Department …	NA	NA	NA	2022-04-19	Frontiers in public health (2022) 10 (855348). Date of Publication: 2022	Frontiers in public health	2022	10	NA	855348	NA	2022	Article	NA	NA	NA	NA	2296-2565 (electronic)	NA	NLM (Medline)	Background: A large body of emerging evidence suggests that per- and polyfluoroalkyl substances (PFAS) affect birth outcomes in various pathways, but the evidence is inconsistent. Therefore, this study aimed to systematically review the epidemiological evidence on PFAS exposure and birth outcomes. Methods: Three electronic databases were searched for epidemiological studies through February 13, 2…	NA	birth outcome,birth weight,meta-analysis,per- and polyfluoroalkyl substances,systematic review	fluorocarbon (adverse drug reaction)	NA	pollutant, prematurity	adverse event, gestational age, human, meta analysis, newborn	NA	NA	NA	NA
n038	nPM038	34785180	Associations between exposure to perfluoroalkyl substances and birth outcomes: A meta-analysis	Yang Z, Liu HY, Yang QY, Chen X, Li W, Leng J, Tang NJ.	Chemosphere. 2022 Mar;291(Pt 2):132909. doi: 10.1016/j.chemosphere.2021.132909. Epub 2021 Nov 13.	Yang Z	Chemosphere	2022	2021-11-17	NA	NA	10.1016/j.chemosphere.2021.132909	TRUE	nEm051	Associations between exposure to perfluoroalkyl substances and birth outcomes: A meta-analysis	NA	Yang Z., Liu H.-Y., Yang Q.-Y., Chen X., Li W., Leng J., Tang N.-J.	(Yang Z.; Liu H.-Y.; Yang Q.-Y.; Chen X.; Tang N.-J., tangnaijun@tmu.edu.cn) Department of Occupational and Environmental Health, School of Public Health, Tianjin Medical University, Tianjin, China. , (Yang Z.; Liu H.-Y.; Yang Q.-Y.; Chen X.; Tang N.-J., tangnaijun@tmu.edu.cn) Tianjin Key Laboratory of Environment, Nutrition, and Public Health, Tianjin Medical University, Tianjin, China. , (Yang …	J. Leng, Tianjin Women and Children's Health Center, Tianjin, China. Email: ljhlzqljhlzq@163.com""N.-J. Tang, Department of Occupational and Environmental Health, School of Public Health, Tianjin Medical University, Tianjin, China. Email: tangnaijun@tmu.edu.cn	NA	2021-11-24	2022-05-31	Chemosphere (2022) 291 Article Number: 132909. Date of Publication: 1 Mar 2022	Chemosphere	2022	291	NA	NA	NA	2022-03-01	Review	NA	NA	NA	NA	1879-1298 (electronic),0045-6535	NA	Elsevier Ltd	Although previous meta-analyses have shown that prenatal PFASs exposure is associated with reduction in birth weight, effects of prenatal PFASs exposure on birth outcomes have not been fully explored. We conducted a meta-analysis of 23 eligible studies searched from Embase, PubMed, and Web of Science before March 21, 2021 to analyze the association between prenatal PFASs exposure and birth outcom…	NA	Birth outcomes,Meta-analysis,Perfluoroalkyl substances	organic compound (adverse drug reaction, special situation for pharmacovigilance), perfluoroalkyl (adverse drug reaction, special situation for pharmacovigilance)	fluorocarbon, perfluoro compound, unclassified drug	pregnancy outcome	confidence interval, decision making, diastolic blood pressure, hazard ratio, human, limit of detection, lipid metabolism, low birth weight (side effect), meta analysis, newborn, Newcastle-Ottawa scale, odds ratio, outcome assessment, quality control, review, risk assessment, sensitivity analysis, small for gestational age (side effect), spontaneous abortion (side effect)	NA	NA	NA	NA
n039	nPM039	33387635	Adult female rats perinatally exposed to perfluorohexane sulfonate (PFHxS) and a mixture of endocrine disruptors display increased body/fat weights without a transcriptional footprint in fat cells	Ramskov Tetzlaff CN, RamhÃ¸j L, Lardenois A, Axelstad M, Evrard B, Chalmel F, Taxvig C, Svingen T.	Toxicol Lett. 2021 Mar 15;339:78-87. doi: 10.1016/j.toxlet.2020.12.018. Epub 2020 Dec 30.	Ramskov Tetzlaff CN	Toxicol Lett	2021	2021-01-02	NA	NA	10.1016/j.toxlet.2020.12.018	TRUE	nEm143	Adult female rats perinatally exposed to perfluorohexane sulfonate (PFHxS) and a mixture of endocrine disruptors display increased body/fat weights without a transcriptional footprint in fat cells	NA	Ramskov Tetzlaff C.N., RamhÃ¸j L., Lardenois A., Axelstad M., Evrard B., Chalmel F., Taxvig C., Svingen T.	(Ramskov Tetzlaff C.N.; RamhÃ¸j L.; Axelstad M.; Taxvig C.; Svingen T., tesv@food.dtu.dk) National Food Institute, Technical University of Denmark, Kongens Lyngby, Denmark. , (Lardenois A.; Evrard B.; Chalmel F.) Univ. Rennes, Inserm, EHESP, Irset (Institut de Recherche en SantÃ©, Environnement et Travail) â€“ UMR_S 1085, Rennes, France.	T. Svingen, Kemitorvet 2, Building 202, Kgs. Lyngby, Denmark. Email: tesv@food.dtu.dk	NA	2021-01-19	2021-02-04	Toxicology Letters (2021) 339 (78-87). Date of Publication: 15 Mar 2021	Toxicology Letters	2021	339	NA	78	87	2021-03-15	Article	NA	NA	NA	NA	1879-3169 (electronic),0378-4274	NA	Elsevier Ireland Ltd	Obesity is a complex disease with many causes, including a possible role for environmental chemicals. Perfluorohexane sulfonate (PFHxS) is one of many per- and polyfluoroalkyl substances (PFASs) frequently detected in humans and it is suspected to be an obesogenic compound. We examined the potential long-term effects of PFHxS on metabolic parameters in rats after developmental exposure to 0.05, 5…	NA	Endocrine disruptors,Metabolic disorders,Obesity,PFAS,PFHxS	endocrine disruptor (drug toxicity), perfluorohexanesulfonic acid (drug toxicity)	3 (4 methylbenzylidene)camphor, 4,4' isopropylidenediphenol, butyl paraben, interleukin 6 (endogenous compound), leptin (endogenous compound), linuron, molecular marker (endogenous compound), phthalic acid dibutyl ester, prochloraz, procymidone, transcriptome (endogenous compound), vinclozolin	adipocyte, body fat, body weight gain, obesity (etiology), perinatal period	adipose tissue, adult, animal cell, animal experiment, animal model, animal tissue, article, birth weight, controlled study, developmental toxicity, female, food intake, gene expression, male, metabolic disorder, metabolic parameters, nonhuman, priority journal, progeny, rat, real time reverse transcription polymerase chain reaction, retroperitoneal fat pad, risk assessment, sex difference, weani…	NA	NA	NA	NA
n040	nPM040	34673042	Occurrence and infant exposure assessment of per and polyfluoroalkyl substances in breast milk from South Africa	Macheka LR, Abafe OA, Mugivhisa LL, Olowoyo JO.	Chemosphere. 2022 Feb;288(Pt 2):132601. doi: 10.1016/j.chemosphere.2021.132601. Epub 2021 Oct 18.	Macheka LR	Chemosphere	2022	2021-10-21	NA	NA	10.1016/j.chemosphere.2021.132601	TRUE	nEm057	Occurrence and infant exposure assessment of per and polyfluoroalkyl substances in breast milk from South Africa	NA	Macheka L.R., Abafe O.A., Mugivhisa L.L., Olowoyo J.O.	(Macheka L.R.; Mugivhisa L.L.; Olowoyo J.O.) Sefako Makgatho Health Sciences University, School of Science and Technology, Pretoria, South Africa. , (Macheka L.R.; Abafe O.A., AbafeO@arc.agric.za) Chemical Residue Analysis Laboratory, Agricultural Research Council, Pretoria, South Africa. , (Abafe O.A., AbafeO@arc.agric.za) School of Health Sciences, University of KwaZulu-Natal, Private Bag x5400…	O.A. Abafe, Chemical Residue Analysis Laboratory, Agricultural Research Council, Pretoria, South Africa. Email: AbafeO@arc.agric.za	NA	2021-11-11	NA	Chemosphere (2022) 288 Article Number: 132601. Date of Publication: 1 Feb 2022	Chemosphere	2022	288	NA	NA	NA	2022-02-01	Article	NA	NA	NA	NA	1879-1298 (electronic),0045-6535	NA	Elsevier Ltd	The exposure of infants to per and polyfluoroalkyl substances (PFAS) through breast-feeding is of global concern owing to their numerous detrimental health effects. This study investigated the occurrence of eleven perfluorocarboxylic acids (PFCAs) and four perfluorosulfonates (PFSAs) in breast milk of nursing mothers from South Africa. The concentrations of PFAS in these samples were measured by …	NA	Breast milk,Dietary exposure,Infant,PFAS,PFOA,PFOS,PFPeA	perfluorooctanoic acid	perfluorododecanoic acid, perfluorohexanesulfonic acid	breast milk, dietary exposure, South Africa	article, biological monitoring, birth weight, body burden, controlled study, feeding, female, gestation period, human, infant, nursing, persistent organic pollutant, preliminary data, tandem mass spectrometry, ultra performance liquid chromatography	NA	NA	NA	NA
n041	nPM041	35679923	Evaluating maternal exposure to an environmental per and polyfluoroalkyl substances (PFAS) mixture during pregnancy: Adverse maternal and fetoplacental effects in a New Zealand White (NZW) rabbit model	Crute CE, Hall SM, Landon CD, Garner A, Everitt JI, Zhang S, Blake B, Olofsson D, Chen H, Murphy SK, Stapleton HM, Feng L.	Sci Total Environ. 2022 Sep 10;838(Pt 4):156499. doi: 10.1016/j.scitotenv.2022.156499. Epub 2022 Jun 6.	Crute CE	Sci Total Environ	2022	2022-06-09	PMC9374364	NIHMS1826667	10.1016/j.scitotenv.2022.156499	TRUE	nEm025	Evaluating maternal exposure to an environmental per and polyfluoroalkyl substances (PFAS) mixture during pregnancy: Adverse maternal and fetoplacental effects in a New Zealand White (NZW) rabbit model	NA	Crute C.E., Hall S.M., Landon C.D., Garner A., Everitt J.I., Zhang S., Blake B., Olofsson D., Chen H., Murphy S.K., Stapleton H.M., Feng L.	(Crute C.E.; Hall S.M.; Murphy S.K.; Stapleton H.M.) Integrated Toxicology and Environmental Health Program, Nicholas School of the Environment, Duke University, Durham, NC, United States. , (Crute C.E.; Hall S.M.; Zhang S.; Murphy S.K.; Stapleton H.M.; Feng L., liping.feng@duke.edu) Nicholas School of the Environment, Duke University, Durham, NC, United States. , (Crute C.E.; Chen H.; Murphy S.K…	L. Feng, 701 W Main St, Durham, NC, United States. Email: liping.feng@duke.edu	NA	2022-06-21	2022-07-05	Science of the Total Environment (2022) 838 Article Number: 156499. Date of Publication: 10 Sep 2022	Science of the Total Environment	2022	838	NA	NA	NA	2022-09-10	Article	NA	NA	NA	NA	1879-1026 (electronic),0048-9697	NA	Elsevier B.V.	Mixtures of per- and polyfluoroalkyl substances (PFAS) are often found in drinking water, and serum PFAS are detected in up to 99% of the population. However, very little is known about how exposure to mixtures of PFAS affects maternal and fetal health. The aim of this study was to investigate maternal, fetal, and placental outcomes after preconceptional and gestational exposure to an environment…	NA	Per- and polyfluoroalkyl substances (PFAS),PFAS mixture,Placental and birth outcomes,Rabbit	NA	perfluoroalkyl substance, polyfluoroalkyl substance, tap water, thyroid hormone (endogenous compound), unclassified drug	maternal exposure, pregnancy	animal cell, animal experiment, animal model, animal tissue, article, autopsy, blood pressure, body fluid, body weight, controlled study, dam (animal), differential gene expression, exposure, female, fetal health, fetus outcome, fetus weight, gestational weight gain, histopathology, hypertension, in vivo study, kidney injury, kidney weight, male, maternal blood, maternal serum, maternal welfare, …	NA	NA	NA	NA
n042	nPM042	29518214	Perfluorohexane Sulfonate (PFHxS) and a Mixture of Endocrine Disrupters Reduce Thyroxine Levels and Cause Antiandrogenic Effects in Rats	RamhÃ¸j L, Hass U, Boberg J, Scholze M, Christiansen S, Nielsen F, Axelstad M.	Toxicol Sci. 2018 Jun 1;163(2):579-591. doi: 10.1093/toxsci/kfy055.	RamhÃ¸j L	Toxicol Sci	2018	2018-03-09	NA	NA	10.1093/toxsci/kfy055	TRUE	nEm344	Perfluorohexane sulfonate (PFHxS) and a mixture of endocrine disrupters reduce thyroxine levels and cause antiandrogenic effects in rats	NA	RamhÃ¸j L., Hass U., Boberg J., Scholze M., Christiansen S., Nielsen F., Axelstad M.	(RamhÃ¸j L.; Hass U.; Boberg J.; Christiansen S.; Axelstad M., maap@food.dtu.dk) Division of Diet, Disease Prevention and Toxicology, National Food Institute, Technical University of Denmark, Lyngby, Denmark. , (Scholze M.) Institute of Environment, Health and Societies, Brunel University London, Uxbridge, United Kingdom. , (Nielsen F.) Environmental Medicine, Institute of Public Health, Universi…	M. Axelstad, Technical University of Denmark, Kemitorvet, Bygning 202, Lyngby, Denmark. Email: maap@food.dtu.dk	NA	2018-06-12	2018-06-15	Toxicological Sciences (2018) 163:2 (579-591). Date of Publication: 1 Jun 2018	Toxicological Sciences	2018	163	2	579	591	2018-06-01	Article	NA	NA	NA	NA	1096-0929 (electronic),1096-6080	NA	Oxford University Press	The developmental toxicity of perfluorohexane sulfonate (PFHxS) is largely unknown despite widespread environmental contamination and presence in human serum, tissues and milk. To thoroughly investigate PFHxS toxicity in developing rats and to mimic a realistic human exposure situation, we examined a low dose close to human relevant PFHxS exposure, and combined the dose-response studies of PFHxS …	NA	Androgens,Endocrine disruptors,Perfluoronated agents,Reproductive & developmental toxicology,Thyroid	androgen (endogenous compound), endocrine disruptor (drug toxicity), perfluorohexanesulfonic acid (drug toxicity), thyroxine (endogenous compound)	NA	reproductive toxicity	animal experiment, animal model, animal tissue, anogenital distance, article, birth weight, controlled study, developmental toxicity, epididymis tail, exposure, female, lactation, liver weight, male, nipple malformation, nonhuman, pregnancy, progeny, rat, thyroxine blood level	NA	NA	NA	NA
n043	nPM043	35588958	Dermal uptake: An important pathway of human exposure to perfluoroalkyl substances?	RagnarsdÃ³ttir O, Abdallah MA, Harrad S.	Environ Pollut. 2022 Aug 15;307:119478. doi: 10.1016/j.envpol.2022.119478. Epub 2022 May 16.	RagnarsdÃ³ttir O	Environ Pollut	2022	2022-05-19	NA	NA	10.1016/j.envpol.2022.119478	TRUE	nEm035	Dermal uptake: An important pathway of human exposure to perfluoroalkyl substances?	NA	RagnarsdÃ³ttir O., Abdallah M.A.-E., Harrad S.	(RagnarsdÃ³ttir O., o.ragnarsdottir@bham.ac.uk; Abdallah M.A.-E.; Harrad S.) School of Geography, Earth & Environmental Sciences, University of Birmingham, Birmingham, United Kingdom.	O. RagnarsdÃ³ttir, School of Geography, Earth & Environmental Sciences, University of Birmingham, Birmingham, United Kingdom. Email: o.ragnarsdottir@bham.ac.uk	NA	2022-06-20	2022-06-24	Environmental Pollution (2022) 307 Article Number: 119478. Date of Publication: 15 Aug 2022	Environmental Pollution	2022	307	NA	NA	NA	2022-08-15	Review	NA	NA	NA	NA	1873-6424 (electronic),0269-7491	NA	Elsevier Ltd	Per- and polyfluoroalkyl substances (PFAS) have been produced and used in a broad range of products since the 1950s. This class, comprising of thousands of chemicals, have been used in many different products ranging from firefighting foam to personal care products and clothes. Even at relatively low levels of exposure, PFAS have been linked to various health effects in humans such as lower birth…	NA	3D-human skin equivalents,Absorption,Bioavailability,Dermal exposure,PFAS	chemical compound, perfluoroalkyl substance	flame retardant, unclassified drug	environmental exposure	bioavailability, human, in vivo study, pollutant, review, skin absorption	NA	NA	NA	NA
n044	nPM044	28959590	Exposure to perfluoroundecanoic acid (PFUnDA) accelerates insulitis development in a mouse model of type 1 diabetes	Bodin J, Groeng EC, Andreassen M, Dirven H, Nygaard UC.	Toxicol Rep. 2016 Aug 29;3:664-672. doi: 10.1016/j.toxrep.2016.08.009. eCollection 2016.	Bodin J	Toxicol Rep	2016	2017-09-30	PMC5616085	NA	10.1016/j.toxrep.2016.08.009	TRUE	nEm460	Exposure to perfluoroundecanoic acid (PFUnDA) accelerates insulitis development in a mouse model of type 1 diabetes	NA	Bodin J., Groeng E.-C., Andreassen M., Dirven H., Nygaard U.C.	(Bodin J., johannabodin74@gmail.com; Groeng E.-C.; Andreassen M.; Dirven H.; Nygaard U.C.) Department of Toxicology and Risk Assessment, Norwegian Institute of Public Health, Oslo, Norway.	J. Bodin, Department of Toxicology and Risk Assessment, Norwegian Institute of Public Health, Oslo, Norway. Email: johannabodin74@gmail.com	NA	2016-09-07	2016-09-12	Toxicology Reports (2016) 3 (664-672). Date of Publication: 2016	Toxicology Reports	2016	3	NA	664	672	2016	Article	NA	NA	NA	NA	2214-7500	NA	Elsevier Inc., usjcs@elsevier.com	Perfluoralkylated substances (PFAS) are classified as persistent, bioaccumulative and toxic substances and are widespread environmental contaminants. Humans are exposed through food, drinking water and air. We have previously reported that bisphenol A accelerates spontaneous diabetes development in non-obese diabetic (NOD) mice and observed in the present study that perfluoroundecanoic acid, PFUn…	NA	Diabetes,Insulitis,NOD mice,Perfluoralkylated substances,PFUnDA,T1DM	perfluoroundecanoic acid (drug toxicity)	gamma interferon (endogenous compound), interleukin 10 (endogenous compound), interleukin 13 (endogenous compound), interleukin 17 (endogenous compound), interleukin 1beta (endogenous compound), interleukin 2 (endogenous compound), interleukin 4 (endogenous compound), interleukin 6 (endogenous compound), tumor necrosis factor (endogenous compound)	drug exposure, insulin dependent diabetes mellitus, insulitis	animal cell, animal experiment, animal model, animal tissue, article, cell infiltration, controlled study, disease severity assessment, environmental exposure, female, flow cytometry, glucose blood level, histology, immunohistochemistry, macrophage, male, microscopy, mouse, nonhuman, pancreas islet cell, priority journal, spleen cell	NA	NA	NA	NA
n045	nPM045	30641376	PFOS, PFOA, estrogen homeostasis, and birth size in Chinese infants	Wang H, Du H, Yang J, Jiang H, O K, Xu L, Liu S, Yi J, Qian X, Chen Y, Jiang Q, He G.	Chemosphere. 2019 Apr;221:349-355. doi: 10.1016/j.chemosphere.2019.01.061. Epub 2019 Jan 9.	Wang H	Chemosphere	2019	2019-01-15	NA	NA	10.1016/j.chemosphere.2019.01.061	TRUE	nEm288	PFOS, PFOA, estrogen homeostasis, and birth size in Chinese infants	NA	Wang H., Du H., Yang J., Jiang H., Karmin O., Xu L., Liu S., Yi J., Qian X., Chen Y., Jiang Q., He G.	(Wang H.; Du H.; Yang J.; Jiang H.; Qian X.; Jiang Q.; He G., gshe@shmu.edu.cn) School of Public Health/Key Laboratory of Public Health Safety of Ministry of Education, Fudan University, Shanghai, China. , (Karmin O.) Department of Animal Science, Department of Physiology and Pathophysiology, University of Manitoba, Winnipeg, Manitoba, Canada. , (Xu L.; Liu S.; Yi J.) Maternal and Child Health Ca…	G. He, No. 130 Dongan Road, Shanghai, China. Email: gshe@shmu.edu.cn	NA	2019-02-04	2020-07-13	Chemosphere (2019) 221 (349-355). Date of Publication: 1 Apr 2019	Chemosphere	2019	221	NA	349	355	2019-04-01	Article	NA	NA	NA	NA	1879-1298 (electronic),0045-6535	NA	Elsevier Ltd	Laboratory studies have suggested that perfluoroalkyl substances (PFASs) could affect fetal growth by disrupting estrogen homeostasis, but there are limited data for human. For this, 424 mother-infant pairs were selected from a cohort established in Hebei Province of North China in 2013. Two typical PFASs, perfluorooctyl sulfonic acid (PFOS) and perfluorooctanoic acid (PFOA), and three typical es…	NA	Birth size,Chinese infants,Cord blood,Estrogens,Perfluoroalkyl substances	alkyl group (endogenous compound), estradiol (endogenous compound), estriol (endogenous compound), estrone (endogenous compound), perfluorooctanoic acid (endogenous compound), perfluorooctyl sulfonic acid (endogenous compound)	unclassified drug	birth, body size, Chinese, fetus growth, homeostasis	adult, article, body weight, cohort analysis, cord serum, estradiol blood level, estriol blood level, estrone blood level, exposure, female, head circumference, human, infant, male, normal human, pregnant woman, prenatal exposure, sex difference	NA	NA	NA	NA
n046	nPM046	34646301	Lipidomic Analyses Reveal Modulation of Lipid Metabolism by the PFAS Perfluoroundecanoic Acid (PFUnDA) in Non-Obese Diabetic Mice	HyÃ¶tylÃ¤inen T, Bodin J, Duberg D, Dirven H, Nygaard UC, OreÅ¡iÄ M.	Front Genet. 2021 Sep 27;12:721507. doi: 10.3389/fgene.2021.721507. eCollection 2021.	HyÃ¶tylÃ¤inen T	Front Genet	2021	2021-10-14	PMC8502800	NA	10.3389/fgene.2021.721507	TRUE	nEm092	Lipidomic Analyses Reveal Modulation of Lipid Metabolism by the PFAS Perfluoroundecanoic Acid (PFUnDA) in Non-Obese Diabetic Mice	NA	HyÃ¶tylÃ¤inen T., Bodin J., Duberg D., Dirven H., Nygaard U.C., OreÅ¡iÄ M.	(HyÃ¶tylÃ¤inen T., tuulia.hyotylainen@oru.se; Duberg D.) School of Science and Technology, Ã–rebro University, Ã–rebro, Sweden. , (Bodin J.; Dirven H.; Nygaard U.C.) Division of Infection Control and Environmental Health, Norwegian Institute of Public Health, Oslo, Norway. , (OreÅ¡iÄ M.) School of Medical Sciences, Ã–rebro University, Ã–rebro, Sweden. , (OreÅ¡iÄ M.) Turku Bioscience Centre, Uni…	T. HyÃ¶tylÃ¤inen, School of Science and Technology, Ã–rebro University, Ã–rebro, Sweden. Email: tuulia.hyotylainen@oru.se	NA	2021-10-18	2021-11-01	Frontiers in Genetics (2021) 12 Article Number: 721507. Date of Publication: 27 Sep 2021	Frontiers in Genetics	2021	12	NA	NA	NA	2021-09-27	Article	NA	NA	NA	NA	1664-8021 (electronic)	NA	Frontiers Media S.A.	Exposure to Per- and polyfluoroalkyl substances (PFAS) has been linked to multiple undesirable health outcomes across a full lifespan, both in animal models as well as in human epidemiological studies. Immunosuppressive effects of PFAS have been reported, including increased risk of infections and suppressed vaccination responses in early childhood, as well as association with immunotoxicity and …	NA	exposure,lipidomics,NOD mice,PFUnDA,type 1 diabetes	perfluoroundecanoic acid (drug analysis)	caspase 3, gelatinase B, phosphatidylcholine, phospholipid, sphingomyelin, triacylglycerol	lipidomics, non insulin dependent diabetes mellitus, nonobese diabetic mouse	animal experiment, animal model, animal tissue, apoptosis, article, blood sampling, cell count, controlled study, enzyme activity, female, flow cytometry, high performance liquid chromatography, histology, homeostasis model assessment, immunohistochemistry, immunotoxicity, insulitis, lipid metabolism, liquid chromatography-mass spectrometry, macrophage, mass spectrometry, mouse, nonhuman	NA	NA	NA	NA
n047	nPM047	25372700	Perfluoroalkyl and polyfluoroalkyl substances and human fetal growth: a systematic review	Bach CC, Bech BH, Brix N, Nohr EA, Bonde JP, Henriksen TB.	Crit Rev Toxicol. 2015 Jan;45(1):53-67. doi: 10.3109/10408444.2014.952400. Epub 2014 Nov 5.	Bach CC	Crit Rev Toxicol	2015	2014-11-06	NA	NA	10.3109/10408444.2014.952400	TRUE	nEm483	Perfluoroalkyl and polyfluoroalkyl substances and human fetal growth: A systematic review	NA	Bach C.C., Bech B.H., Brix N., Nohr E.A., Bonde J.P.E., Henriksen T.B.	(Bach C.C., ccbach@clin.au.dk; Brix N.; Henriksen T.B.) Department of Pediatrics, Perinatal Epidemiology Research Unit, Aarhus University Hospital, Brendstrupgaardsvej 100, Aarhus N, Denmark. , (Bach C.C., ccbach@clin.au.dk; Bech B.H.; Nohr E.A.) Department of Public Health, Section for Epidemiology, Aarhus University, Aarhus C, Denmark. , (Bach C.C., ccbach@clin.au.dk; Bonde J.P.E.) Department o…	C.C. Bach, Department of Pediatrics, Perinatal Epidemiology Research Unit, Aarhus University Hospital, Brendstrupgaardsvej 100, Aarhus N, Denmark. Email: ccbach@clin.au.dk	NA	2015-01-29	2015-02-03	Critical Reviews in Toxicology (2015) 45:1 (53-67). Date of Publication: 1 Jan 2015	Critical Reviews in Toxicology	2015	45	1	53	67	2015-01-01	Review	NA	NA	NA	NA	1547-6898 (electronic),1040-8444	NA	Informa Healthcare, healthcare.enquiries@informa.com	Background: Exposure to perfluoroalkyl and polyfluoroalkyl substances (PFASs) is ubiquitous in most regions of the world. The most commonly studied PFASs are perfluorooctane sulfonate (PFOS) and perfluorooctanoate (PFOA). Animal studies indicate that maternal PFAS exposure is associated with reduced fetal growth. However, the results of human studies are inconsistent. Objectives: To summarize the…	NA	Birth weight,Epidemiology,Humans,Perfluorinated chemicals,Perfluoroalkyl acids,Perfluorooctane sulfonate,Perfluorooctanoate,Small for gestational age	perfluorooctanesulfonic acid (drug toxicity), perfluorooctanoic acid (drug toxicity)	NA	fetus growth	birth weight, cord serum, environmental exposure, gestational age, human, low birth weight, maternal blood, outcome assessment, pregnant woman, review, small for gestational age, umbilical cord	NA	NA	NA	NA
n048	nPM048	36422892	Reduced Birth Weight and Exposure to Per- and Polyfluoroalkyl Substances: A Review of Possible Underlying Mechanisms Using the AOP-HelpFinder	Gundacker C, Audouze K, Widhalm R, Granitzer S, Forsthuber M, Jornod F, WielsÃ¸e M, Long M, HalldÃ³rsson TI, Uhl M, Bonefeld-JÃ¸rgensen EC.	Toxics. 2022 Nov 12;10(11):684. doi: 10.3390/toxics10110684.	Gundacker C	Toxics	2022	2022-11-24	PMC9699222	NA	10.3390/toxics10110684	FALSE	NA	NA	NA	NA	NA	NA	NA	NA	NA	NA	NA	NA	NA	NA	NA	NA	NA	NA	NA	NA	NA	NA	NA	NA	NA	NA	NA	NA	NA	NA	NA	NA	NA	NA	NA	NA
n049	nPM049	33208860	Gestational perfluoroalkyl substance exposure and body mass index trajectories over the first 12 years of life	Braun JM, Eliot M, Papandonatos GD, Buckley JP, Cecil KM, Kalkwarf HJ, Chen A, Eaton CB, Kelsey K, Lanphear BP, Yolton K.	Int J Obes (Lond). 2021 Jan;45(1):25-35. doi: 10.1038/s41366-020-00717-x. Epub 2020 Nov 18.	Braun JM	Int J Obes (Lond)	2021	2020-11-19	PMC7755727	NIHMS1643278	10.1038/s41366-020-00717-x	TRUE	nEm162	Gestational perfluoroalkyl substance exposure and body mass index trajectories over the first 12 years of life	NA	Braun J.M., Eliot M., Papandonatos G.D., Buckley J.P., Cecil K.M., Kalkwarf H.J., Chen A., Eaton C.B., Kelsey K., Lanphear B.P., Yolton K.	(Braun J.M., joseph_braun_1@brown.edu; Eliot M.; Eaton C.B.; Kelsey K.) Department of Epidemiology, Brown University, Providence, RI, United States. , (Papandonatos G.D.) Department of Biostatistics, Brown University, Providence, RI, United States. , (Buckley J.P.) Department of Environmental Health and Engineering, Johns Hopkins University, Baltimore, MD, United States. , (Cecil K.M.) Department…	J.M. Braun, Department of Epidemiology, Brown University, Providence, RI, United States. Email: joseph_braun_1@brown.edu	NA	2020-11-24	2020-11-24	International Journal of Obesity (2021) 45:1 (25-35). Date of Publication: 1 Jan 2021	International Journal of Obesity	2021	45	1	25	35	2021-01-01	Article	NA	NA	NA	NA	1476-5497 (electronic),0307-0565	NA	Springer Nature	Background/objectives: Gestational exposure to perfluoroalkyl substances (PFAS), a ubiquitous class of persistent endocrine disrupting chemicals, is associated with increased risk of obesity and cardiometabolic disease. However, it is unclear if gestational PFAS exposure is associated with adiposity trajectories related to adult obesity and cardiometabolic health. Subjects/methods: We measured pe…	NA	NA	perfluorohexanesulfonic acid, perfluorooctanesulfonic acid, perfluorooctanoic acid	cotinine, tobacco smoke	body mass, childhood obesity (etiology), prenatal exposure	adult, article, body height, body weight, child, cohort analysis, controlled study, female, household income, human, human tissue, infant, male, maternal serum, priority journal, prospective study, school child	NA	NA	NA	NA
n050	nPM050	35143854	Concentrations of per- and polyfluoroalkyl substances (PFAS) in human placental tissues and associations with birth outcomes	Hall SM, Zhang S, Hoffman K, Miranda ML, Stapleton HM.	Chemosphere. 2022 May;295:133873. doi: 10.1016/j.chemosphere.2022.133873. Epub 2022 Feb 7.	Hall SM	Chemosphere	2022	2022-02-10	PMC8923299	NIHMS1781735	10.1016/j.chemosphere.2022.133873	TRUE	nEm046	Concentrations of per- and polyfluoroalkyl substances (PFAS) in human placental tissues and associations with birth outcomes	NA	Hall S.M., Zhang S., Hoffman K., Miranda M.L., Stapleton H.M.	(Hall S.M.; Zhang S.; Hoffman K.; Stapleton H.M., heather.stapleton@duke.edu) Nicholas School of the Environment, Duke University, 9 Circuit Drive, Box 90328, Durham, NC, United States. , (Miranda M.L.) University of Notre Dame, Department of Applied and Computational Mathematics and Statistics, Notre Dame, IN, United States.	H.M. Stapleton, 9 Circuit Drive, Box 90328, Durham, NC, United States. Email: heather.stapleton@duke.edu	NA	2022-02-18	2022-07-12	Chemosphere (2022) 295 Article Number: 133873. Date of Publication: 1 May 2022	Chemosphere	2022	295	NA	NA	NA	2022-05-01	Article	NA	NA	NA	NA	1879-1298 (electronic),0045-6535	NA	Elsevier Ltd	Per- and polyfluoroalkyl substances (PFAS) are ubiquitous environmental contaminants commonly detected in human serum. Previous studies have observed associations between maternal serum PFAS and adverse pregnancy and birth outcomes such as lower birth weight or pre-eclampsia; however, few studies have explored these associations with birth outcomes and placental tissue PFAS concentration. The pla…	NA	Birth outcomes,Birth weight,Perfluoroalkyl,PFAS,Placenta,Polyfluoroalkyl	environmental chemical, perfluoroalkyl substance, polyfluoroalkyl substance	perfluorodecanoic acid, perfluorononanoic acid, perfluorooctanesulfonic acid, perfluorooctanoic acid, unclassified drug	placenta tissue, pregnancy outcome	adult, article, birth weight, cohort analysis, environmental exposure, female, gestational age, high performance liquid chromatograph, high performance liquid chromatography, human, human experiment, human tissue, infant, limit of detection, linear regression analysis, liquid chromatography-mass spectrometry, low birth weight, male, mass spectrometry, maternal age, multipara, normal human, nullip…	NA	NA	1260 Infinity II (Agilent)	Agilent
n051	nPM051	35577131	Perfluoroalkyl substances in hen eggs from different types of husbandry	Mikolajczyk S, Pajurek M, Warenik-Bany M.	Chemosphere. 2022 Sep;303(Pt 1):134950. doi: 10.1016/j.chemosphere.2022.134950. Epub 2022 May 13.	Mikolajczyk S	Chemosphere	2022	2022-05-16	NA	NA	10.1016/j.chemosphere.2022.134950	TRUE	nEm027	Perfluoroalkyl substances in hen eggs from different types of husbandry	NA	Mikolajczyk S., Pajurek M., Warenik-Bany M.	(Mikolajczyk S., szczepan.mikolajczyk@piwet.pulawy.pl; Pajurek M.; Warenik-Bany M.) National Veterinary Research Institute, Radiobiology Department, NRL for Halogenated POPs (PCDD/Fs, PCBs and PBDE) in Food and Feed, 57 Partyzantow Avenue, Pulawy, Poland.	S. Mikolajczyk, National Veterinary Research Institute, Radiobiology Department, NRL for Halogenated POPs (PCDD/Fs, PCBs and PBDE) in Food and Feed, 57 Partyzantow Avenue, Pulawy, Poland. Email: szczepan.mikolajczyk@piwet.pulawy.pl	NA	2022-05-31	2022-07-05	Chemosphere (2022) 303 Article Number: 134950. Date of Publication: 1 Sep 2022	Chemosphere	2022	303	NA	NA	NA	2022-09-01	Article	NA	NA	NA	NA	1879-1298 (electronic),0045-6535	NA	Elsevier Ltd	Poultry eggs from cage, ecological and free range production were analyzed in terms of perfluoroalkyl substances (PFASs). Taking into account all fourteen analyzed compounds, perfluorobutanoic acid (PFBA) reach the highest concentrations (mean 0.23, 0.24, 0.27 Î¼g/kg wet weight (w.w) for organic, cage and free range eggs respectively. Taking into account the lower bound sum of four PFASs: PFOS, P…	NA	Hen eggs,PFAS,Risk assessment	organofluorine derivative, perfluoroalkyl substance	perfluorobutanesulfonic acid, perfluorobutanoic acid, perfluorodecanoic acid, perfluorododecanoic acid, perfluoroheptanesulfonic acid, perfluoroheptanoic acid, perfluorohexanesulfonic acid, perfluorohexanoic acid, perfluorononanoic acid, perfluorooctanesulfonic acid, perfluorooctanoic acid, perfluoropentanesulfonic acid, perfluoropentanoic acid, perfluoroundecanoic acid, unclassified drug	agriculture, poultry egg	adult, animal experiment, article, cage, chemical analysis, concentration process, consumer, controlled study, drug tolerability, egg production, female, food contamination, hen, nonhuman, outcome assessment, quality control, risk assessment	NA	NA	NA	NA
n052	nPM052	27927675	Is body mass index associated with patellofemoral pain and patellofemoral osteoarthritis? A systematic review and meta-regression and analysis	Hart HF, Barton CJ, Khan KM, Riel H, Crossley KM.	Br J Sports Med. 2017 May;51(10):781-790. doi: 10.1136/bjsports-2016-096768. Epub 2016 Dec 7.	Hart HF	Br J Sports Med	2017	2016-12-09	NA	NA	10.1136/bjsports-2016-096768	TRUE	nEm393	Is body mass index associated with patellofemoral pain and patellofemoral osteoarthritis? A systematic review and meta-regression and analysis	NA	Hart H.F., Barton C.J., Khan K.M., Riel H., Crossley K.M.	(Hart H.F.; Khan K.M.) Centre for Hip Health and Mobility, University of British Columbia, Vancouver, British Columbia, Canada, (Hart H.F.; Barton C.J.; Crossley K.M.) La Trobe Sport and Exercise Medicine Research Centre, School of Allied Health, La Trobe University, Bundoora, Victoria, Australia, (Riel H.) Research Unit for General Practice in Aalborg, Department of Clinical Medicine, Aalborg Un…	NA	NA	NA	2017-09-01	British journal of sports medicine (2017) 51:10 (781-790). Date of Publication: 1 May 2017	British journal of sports medicine	2017	51	10	781	790	2017-05-01	Article	NA	NA	NA	NA	1473-0480 (electronic)	NA	NA	BACKGROUND: Patellofemoral pain (PFP) occurs frequently, and may be related to patellofemoral osteoarthritis (PFOA). Obesity is associated with increased risk of knee OA. This systematic review involves a meta-regression and analysis to determine the relationship between body mass index (BMI) and PFP and PFOA, and to determine the link between BMI and interventional outcomes.METHODS: We searched …	NA	Body mass index,Osteoarthritis	NA	NA	body mass	adolescent, adult, complication, human, knee osteoarthritis, meta analysis, observational study, patellofemoral pain syndrome, risk factor, statistical bias	NA	NA	NA	NA
n053	nPM053	35777115	Mixture of environmental pollutants in breast milk from a Spanish cohort of nursing mothers	Rovira J, MartÃ­nez MÃ, Mari M, Cunha SC, Fernandes JO, Marmelo I, Marques A, Haug LS, Thomsen C, Nadal M, Domingo JL, Schuhmacher M.	Environ Int. 2022 Jun 25;166:107375. doi: 10.1016/j.envint.2022.107375. Online ahead of print.	Rovira J	Environ Int	2022	2022-07-01	NA	NA	10.1016/j.envint.2022.107375	TRUE	nEm037	Mixture of environmental pollutants in breast milk from a Spanish cohort of nursing mothers	NA	Rovira J., MartÃ­nez M.Ã., Mari M., Cunha S.C., Fernandes J.O., Marmelo I., Marques A., Haug L.S., Thomsen C., Nadal M., Domingo J.L., Schuhmacher M.	(Rovira J.; Mari M.; Schuhmacher M.) Environmental Engineering Laboratory, Departament d'Enginyeria Quimica, Universitat Rovira i Virgili, Av. PaÃ¯sos Catalans 26, Tarragona, Catalonia, Spain. , (Rovira J.; Nadal M.; Domingo J.L.) Laboratory of Toxicology and Environmental Health, School of Medicine, IISPV, Universitat Rovira i Virgili, Sant LlorenÃ§ 21, Reus, Catalonia, Spain. , (MartÃ­nez M.Ã.…	M.Ã. MartÃ­nez, Institut d'InvestigaciÃ³ SanitÃ ria Pere Virgili (IISPV), Reus, Spain. Email: mariaangeles.martinez@iispv.cat	NA	2022-07-06	2022-07-28	Environment International (2022) 166 Article Number: 107375. Date of Publication: 1 Aug 2022	Environment International	2022	166	NA	NA	NA	2022-08-01	Article	NA	NA	NA	NA	1873-6750 (electronic),0160-4120	NA	Elsevier Ltd	Breastfeeding is one of the most effective ways to ensure child health and survival, with several benefits for both the infants and their mothers. However, breast milk can contain environmental pollutants with endocrine disruption capacity, neurotoxicity and/or potential to alter microbiota. Monitoring breast milk provides information on the current chemical exposure of breastfed infants and, in …	NA	Breast milk,Early life exposure,Endocrine disruptors,Human biomonitoring,Neurotoxicity,Pesticides,POPs	NA	1,1 dichloro 2,2 bis(4 chlorophenyl)ethylene, 4,4' isopropylidenediphenol, chlorphenotane, chlorpyrifos, hexachlorobenzene, immunoglobulin A (endogenous compound), methylmercury, oxychlordane, perfluorohexanesulfonic acid, perfluorononanoic acid, perfluorooctanoic acid, perfluoroundecanoic acid, polybrominated diphenyl ether, polychlorinated biphenyl, tetrabromobisphenol A	breast milk, mother, pollutant, Spanish nursing mother	article, body mass, breast feeding, child health, cohort analysis, controlled study, female, human, lowest income group, mass spectrometry, microflora, multipara, neurotoxicity, persistent organic pollutant, primipara, smoking	NA	NA	NA	NA
n054	nPM054	33778349	Birth weight and perfluorooctane sulfonic acid: a random-effects meta-regression analysis	Dzierlenga MW, Crawford L, Longnecker MP.	Environ Epidemiol. 2020 Apr 23;4(3):e095. doi: 10.1097/EE9.0000000000000095. eCollection 2020 Jun.	Dzierlenga MW	Environ Epidemiol	2020	2021-03-29	PMC7941775	NA	10.1097/ee9.0000000000000095	TRUE	nEm240	Birth weight and perfluorooctane sulfonic acid: A random-effects meta-regression analysis	NA	Dzierlenga M.W., Crawford L., Longnecker M.P.	(Dzierlenga M.W., mdzerlenga@ramboll.com; Crawford L.; Longnecker M.P.) Environment and Health, Ramboll, NC, United States.	M.W. Dzierlenga, Ramboll, 3214 Charles B. Root Wynd, Suite 130, Raleigh, NC, United States. Email: mdzerlenga@ramboll.com	NA	2020-07-17	2020-12-04	Environmental Epidemiology (2020) 4:3 Article Number: e095. Date of Publication: 2020	Environmental Epidemiology	2020	4	3	NA	NA	2020	Article	NA	NA	NA	NA	2474-7882 (electronic)	NA	Wolters Kluwer Health	Background: Perfluorooctane sulfonic acid (PFOS) is a ubiquitous environmental contaminant. Most people in developed countries have detectable serum concentrations. Lower birth weight has been associated with serum PFOS in studies world-wide, many of which have been published only recently. Methods: To facilitate a causal assessment of the birth weight and PFOS association, we updated previous me…	NA	Birth weight,Meta-regression,Metaanalysis,Perfluorooctane sulfonic acid,Random effects	perfluorooctanesulfonic acid	NA	birth weight, maternal exposure, risk assessment	article, Asian, blood level, blood sampling, child, confidence interval, controlled study, data collection method, developed country, female, gestational age, human, human experiment, Medline, meta analysis (topic), observation, observational method, pregnancy, priority journal, regression analysis, serum	NA	NA	NA	NA
n055	nPM055	35977568	Perfluoroalkane substances in national samples from global monitoring plan projects (2017-2019)	Fiedler H, Sadia M, Baabish A, Sobhanei S.	Chemosphere. 2022 Nov;307(Pt 3):136038. doi: 10.1016/j.chemosphere.2022.136038. Epub 2022 Aug 14.	Fiedler H	Chemosphere	2022	2022-08-17	NA	NA	10.1016/j.chemosphere.2022.136038	TRUE	nEm013	Perfluoroalkane substances in national samples from global monitoring plan projects (2017â€“2019)	NA	Fiedler H., Sadia M., Baabish A., Sobhanei S.	(Fiedler H., heidelore.fiedler@oru.se; Sadia M.; Baabish A.; Sobhanei S.) Ã–rebro University, School of Science and Technology, MTM Research Centre, Ã–rebro, Sweden. , (Sadia M.) Freshwater and Marine Ecology, Institute for Biodiversity and Ecosystem Dynamics, University of Amsterdam, GE, Amsterdam, Netherlands.	H. Fiedler, Ã–rebro University, School of Science and Technology, MTM Research Centre, Ã–rebro, Sweden. Email: heidelore.fiedler@oru.se	NA	2022-09-02	2022-09-14	Chemosphere (2022) 307 Article Number: 136038. Date of Publication: 1 Nov 2022	Chemosphere	2022	307	NA	NA	NA	2022-11-01	Article	NA	NA	NA	NA	1879-1298 (electronic),0045-6535	NA	Elsevier Ltd	The global monitoring plan (GMP) established under the Stockholm Convention on Persistent Organic Pollutants (POPs) had defined ambient air, human milk or blood, and water as core matrices to be analyzed and assessed for spatial and temporal distribution. Within projects coordinated by the United Nations Environment Programme (UNEP), developing countries were offered to have other matrices analyz…	NA	NA	perfluorooctanesulfonic acid, perfluorooctanoic acid	drinking water, perfluorodecanoic acid, perfluorododecanoic acid, perfluorohexanesulfonic acid, perfluorohexanoic acid, perfluorononanoic acid, perfluoroundecanoic acid, surface water	environmental monitoring, persistent organic pollutant	Africa, air sampling, ambient air, article, Asia, chicken meat, controlled study, dairy product, developing country, fresh weight, limit of quantitation, nonhuman, principal component analysis, quality control, South and Central America, spatiotemporal analysis	NA	NA	NA	NA
n056	nPM056	35285689	Prenatal Exposure to Per- and Polyfluoroalkyl Substances and Child Growth Trajectories in the First Two Years	Gao Y, Luo J, Zhang Y, Pan C, Ren Y, Zhang J, Tian Y; Shanghai Birth Cohort.	Environ Health Perspect. 2022 Mar;130(3):37006. doi: 10.1289/EHP9875. Epub 2022 Mar 14.	Gao Y	Environ Health Perspect	2022	2022-03-14	PMC8919954	NA	10.1289/ehp9875	TRUE	nEm053	Prenatal Exposure to Per-and Polyfluoroalkyl Substances and Child Growth Trajectories in the First Two Years	NA	Gao Y., Luo J., Zhang Y., Pan C., Ren Y., Zhang J., Tian Y.	(Gao Y.; Zhang J., junjimzhang@sina.com; Tian Y., tianmiejp@sjtu.edu.cn) Ministry of Education â€“ Shanghai Key Laboratory of Childrenâ€™s Environmental Health, Xinhua Hospital, Shanghai Jiao Tong University School of Medicine, Shanghai, China. , (Gao Y.; Zhang Y.; Pan C.; Ren Y.; Tian Y., tianmiejp@sjtu.edu.cn) Department of Environmental Health, School of Public Health, Shanghai Jiao Tong Unive…	J. Zhang, Ministry of Education â€“ Shanghai Key Laboratory of Childrenâ€™s Environmental Health, Xinhua Hospital, Shanghai Jiao Tong University School of Medicine, Shanghai, China. Email: junjimzhang@sina.com""Y. Tian, Ministry of Education â€“ Shanghai Key Laboratory of Childrenâ€™s Environmental Health, Xinhua Hospital, Shanghai Jiao Tong University School of Medicine, Shanghai, China. Email: …	NA	NA	2022-03-29	Environmental Health Perspectives (2022) 130:3 Article Number: 037006. Date of Publication: 1 Mar 2022	Environmental Health Perspectives	2022	130	3	NA	NA	2022-03-01	Article	NA	NA	NA	NA	1552-9924 (electronic),0091-6765	NA	Public Health Services, US Dept of Health and Human Services	BACKGROUND: Pregnant women are ubiquitously exposed to per-and polyfluoroalkyl substances (PFAS). Prenatal exposure to PFAS has been associated with lower birth weight but also with excess adiposity and higher weight in childhood. These mixed findings warrant investigation of the relationship between PFAS and dynamic offspring growth. OBJECTIVES: To investigate the association between prenatal PF…	NA	NA	NA	NA	child growth, prenatal exposure	adult, anthropometry, article, birth cohort, child, cohort analysis, controlled study, female, first trimester pregnancy, head circumference, human, human experiment, human tissue, major clinical study, male, multinomial logistic regression, pregnant woman, progeny, World Health Organization	NA	NA	NA	NA
n057	nPM057	33186575	Serum per- and polyfluoroalkyl substance (PFAS) concentrations and predictors of exposure among pregnant African American women in the Atlanta area, Georgia	Chang CJ, Ryan PB, Smarr MM, Kannan K, Panuwet P, Dunlop AL, Corwin EJ, Barr DB.	Environ Res. 2021 Jul;198:110445. doi: 10.1016/j.envres.2020.110445. Epub 2020 Nov 10.	Chang CJ	Environ Res	2021	2020-11-13	PMC8107192	NIHMS1648006	10.1016/j.envres.2020.110445	TRUE	nEm116	Serum per- and polyfluoroalkyl substance (PFAS) concentrations and predictors of exposure among pregnant African American women in the Atlanta area, Georgia	NA	Chang C.-J., Ryan P.B., Smarr M.M., Kannan K., Panuwet P., Dunlop A.L., Corwin E.J., Barr D.B.	(Chang C.-J.; Ryan P.B.; Smarr M.M.; Panuwet P.; Barr D.B., dbbarr@emory.edu) Gangarosa Department of Environmental Health, Rollins School of Public Health, Emory University, Atlanta, GA, United States. , (Kannan K.) Department of Pediatrics and Department of Environmental Medicine, New York University School of Medicine, New York, NY, United States. , (Dunlop A.L.) Nell Hodgson Woodruff School o…	D.B. Barr, Gangarosa Department of Environmental Health, Rollins School of Public Health, Emory University, Atlanta, GA, United States. Email: dbbarr@emory.edu	NA	2020-12-01	2021-06-30	Environmental Research (2021) 198 Article Number: 110445. Date of Publication: 1 Jul 2021	Environmental Research	2021	198	NA	NA	NA	2021-07-01	Article	NA	NA	NA	NA	1096-0953 (electronic),0013-9351	NA	Academic Press Inc.	Exposure to per- and polyfluoroalkyl substances (PFAS) has been associated with adverse health outcomes, especially when exposure occurs within sensitive time windows such as the pre- and post-natal periods and early childhood. However, few studies have focused on PFAS exposure distribution and predictors in pregnant women, especially among African American women. We quantified serum concentratio…	NA	Biomonitoring,Exposure predictors,per- and polyfluoroalkyl substance (PFAS),Prenatal exposure,Vulnerable population	alkyl group, per and polyfluoroalkyl substance, polymer	cosmetic, drinking water, n methyl perfluorooctane sulfonamido acetic acid, perfluorodecanoic acid, perfluorohexanesulfonic acid, perfluorononanoic acid, perfluorooctanesulfonic acid, perfluorooctanoic acid, perfluoropentanoic acid, perfluoroundecanoic acid	environmental exposure, pregnant woman	adult, African American, body mass, cannabis use, cohort analysis, college, demography, educational status, female, Georgia (U.S.), high school, home environment, human, major clinical study, parity, priority journal, race, tobacco, tobacco use	NA	NA	NA	NA
n058	nPM058	36162478	Gestational per- and polyfluoroalkyl substances exposure and infant body mass index trajectory in the New Hampshire Birth Cohort Study	Romano ME, Heggeseth BC, Gallagher LG, Botelho JC, Calafat AM, Gilbert-Diamond D, Karagas MR.	Environ Res. 2022 Dec;215(Pt 3):114418. doi: 10.1016/j.envres.2022.114418. Epub 2022 Sep 23.	Romano ME	Environ Res	2022	2022-09-26	PMC9841894	NIHMS1859615	10.1016/j.envres.2022.114418	TRUE	nEm007	Gestational per- and polyfluoroalkyl substances exposure and infant body mass index trajectory in the New Hampshire Birth Cohort Study	NA	Romano M.E., Heggeseth B.C., Gallagher L.G., Botelho J.C., Calafat A.M., Gilbert-Diamond D., Karagas M.R.	(Romano M.E., Megan.E.Romano@dartmouth.edu; Gallagher L.G.; Gilbert-Diamond D.; Karagas M.R.) Department of Epidemiology, Dartmouth Geisel School of Medicine, Lebanon, NH, United States. , (Heggeseth B.C.) Department of Mathematics, Statistics, and Computer Science, Macalester College, St. Paul, MN, United States. , (Botelho J.C.; Calafat A.M.) National Center for Environmental Health, Centers fo…	M.E. Romano, Department of Epidemiology, Geisel School of Medicine at Dartmouth, 1 Medical Center Drive, HB 7927, Lebanon, NH, United States. Email: Megan.E.Romano@dartmouth.edu	NA	2022-10-11	2022-10-14	Environmental Research (2022) 215 Article Number: 114418. Date of Publication: 1 Dec 2022	Environmental Research	2022	215	NA	NA	NA	2022-12-01	Article	NA	NA	NA	NA	1096-0953 (electronic),0013-9351	NA	Academic Press Inc.	Per- and polyfluoroalkyl substances (PFAS) are environmentally persistent, potential metabolic disruptors of concern for infants. Mothers participating in the New Hampshire Birth Cohort Study (NHBCS) provided a plasma sample during pregnancy to measure concentrations of seven PFAS, and infant weight and length were abstracted from well-child visits between birth and 12 months. Sex-specific growth…	NA	Growth trajectories,Infant,Longitudinal Studies,Perfluoroalkyl substances,Polyfluoroalkyl substances	perfluoroalkanoic acid	perfluorooctanesulfonic acid, perfluorooctanoic acid, perfluoroundecanoic acid	blood level, body mass, maternal plasma	adult, article, child growth, cohort analysis, concentration (parameter), controlled study, female, human, infancy, infant, longitudinal study, major clinical study, male, New Hampshire, pregnancy, prospective study	NA	NA	NA	NA
n059	nPM059	23441933	Absorption, distribution, and milk secretion of the perfluoroalkyl acids PFBS, PFHxS, PFOS, and PFOA by dairy cows fed naturally contaminated feed	Kowalczyk J, Ehlers S, Oberhausen A, Tischer M, FÃ¼rst P, Schafft H, Lahrssen-Wiederholt M.	J Agric Food Chem. 2013 Mar 27;61(12):2903-12. doi: 10.1021/jf304680j. Epub 2013 Mar 13.	Kowalczyk J	J Agric Food Chem	2013	2013-02-28	NA	NA	10.1021/jf304680j	TRUE	nEm554	Absorption, distribution, and milk secretion of the perfluoroalkyl acids PFBS, PFHxS, PFOS, and PFOA by dairy cows fed naturally contaminated feed	NA	Kowalczyk J., Ehlers S., Oberhausen A., Tischer M., FÃ¼rst P., Schafft H., Lahrssen-Wiederholt M.	(Kowalczyk J., Janine.Kowalczyk@bfr.bund.de; Oberhausen A.; Tischer M.; Schafft H.; Lahrssen-Wiederholt M.) BfR - Federal Institute for Risk Assessment, Max-Dohrn-Strasse 8-10, 10589 Berlin, Germany. , (Ehlers S.; FÃ¼rst P.) CVUA-MEL - Chemical and Veterinary Analytical Institute MÃ¼nsterland-Emscher-Lippe, Joseph-KÃ¶nig-Strasse 40, 48147 MÃ¼nster, Germany.	J. Kowalczyk, BfR - Federal Institute for Risk Assessment, Max-Dohrn-Strasse 8-10, 10589 Berlin, Germany. Email: Janine.Kowalczyk@bfr.bund.de	NA	NA	2014-01-13	Journal of Agricultural and Food Chemistry (2013) 61:12 (2903-2912). Date of Publication: 27 Mar 2013	Journal of Agricultural and Food Chemistry	2013	61	12	2903	2912	2013-03-27	Article	NA	NA	NA	NA	0021-8561,1520-5118 (electronic)	NA	American Chemical Society, 2540 Olentangy River Road, P.O. Box 3337, Columbus, United States.	The transfer of the perfluoroalkyl acids (PFAAs) perfluorobutanesulfonate (PFBS), perfluorohexanesulfonate (PFHxS), perfluorooctanesulfonate (PFOS), and perfluorooctanoate (PFOA) from feed into tissue and milk of dairy cows was investigated. Holstein cows (n = 6) were fed a PFAA-contaminated feed for 28 days. After the PFAA-feeding period, three cows were slaughtered while the others were fed PFA…	NA	ADMET,dairy cows,milk,perfluoroalkyl acids,PFAA,PFBS,PFHxS,PFOA,PFOS,toxicokinetics	alkanesulfonic acid (drug administration, pharmacokinetics), fluorocarbon (drug administration, pharmacokinetics), octanoic acid derivative (drug administration, pharmacokinetics), sulfonic acid derivative (drug administration, pharmacokinetics)	perflubutane, perfluorohexanesulfonic acid, perfluorooctanesulfonic acid, perfluorooctanoic acid	food contamination (drug analysis), milk	animal, animal food (drug analysis), article, bovine, chemistry, comparative study, dairying, female, kidney, liver, meat (drug analysis), metabolism	NA	NA	NA	NA
n060	nPM060	36002061	Prenatal exposure to per- and polyfluoroalkyl substances and childhood adiposity at 7 years of age	Zhang S, Lei X, Zhang Y, Shi R, Zhang Q, Gao Y, Yuan T, Li J, Tian Y.	Chemosphere. 2022 Nov;307(Pt 4):136077. doi: 10.1016/j.chemosphere.2022.136077. Epub 2022 Aug 21.	Zhang S	Chemosphere	2022	2022-08-24	NA	NA	10.1016/j.chemosphere.2022.136077	TRUE	nEm014	Prenatal exposure to per- and polyfluoroalkyl substances and childhood adiposity at 7 years of age	NA	Zhang S., Lei X., Zhang Y., Shi R., Zhang Q., Gao Y., Yuan T., Li J., Tian Y.	(Zhang S.; Lei X., xiaoninglei@sjtu.edu.cn; Zhang Y.; Shi R.; Gao Y.; Tian Y., tianmiejp@sjtu.edu.cn) Department of Environmental Health, School of Public Health, Shanghai Jiao Tong University School of Medicine, Shanghai, China. , (Zhang Q.; Li J.; Tian Y., tianmiejp@sjtu.edu.cn) MOE-Shanghai Key Laboratory of Children's Environmental Health, Xin Hua Hospital, Shanghai Jiao Tong University Schoo…	Y. Tian, 280 South Chongqing Road, Shanghai, China. Email: tianmiejp@sjtu.edu.cn""X. Lei, Department of Environmental Health, School of Public Health, Shanghai Jiao Tong University School of Medicine, Shanghai, China. Email: xiaoninglei@sjtu.edu.cn	NA	2022-09-08	2022-10-26	Chemosphere (2022) 307 Article Number: 136077. Date of Publication: 1 Nov 2022	Chemosphere	2022	307	NA	NA	NA	2022-11-01	Article	NA	NA	NA	NA	1879-1298 (electronic),0045-6535	NA	Elsevier Ltd	Background: An increasing number of studies have reported that prenatal per- and polyfluoroalkyl substances (PFAS) exposure may increase childhood adiposity. However, limited data is available in China, and the overall effects of PFAS mixture remain unclear. Objective: To examine the association of prenatal exposure to individual PFAS and their mixture with childhood adiposity at 7 years of age. …	NA	Childhood adiposity,Mixture exposure,Per- and polyfluoroalkyl substances,Sex modification,Weighted quantile sum (WQS) regression	NA	NA	obesity, prenatal exposure	adult, article, birth cohort, body fat, body fat percentage, body mass, child, China, cohort analysis, controlled study, data analysis software, dilution, fat mass, female, follow up, hospital admission, human, human tissue, infant, linear regression analysis, male, maternal serum, pollutant, quality control, school child, sex difference, structured questionnaire, waist circumference, waist to he…	NA	NA	NA	NA
n061	nPM061	34343551	Association between gestational PFAS exposure and Children's adiposity in a diverse population	Bloom MS, Commodore S, Ferguson PL, Neelon B, Pearce JL, Baumer A, Newman RB, Grobman W, Tita A, Roberts J, Skupski D, Palomares K, Nageotte M, Kannan K, Zhang C, Wapner R, Vena JE, Hunt KJ.	Environ Res. 2022 Jan;203:111820. doi: 10.1016/j.envres.2021.111820. Epub 2021 Jul 31.	Bloom MS	Environ Res	2022	2021-08-03	PMC8616804	NIHMS1731171	10.1016/j.envres.2021.111820	TRUE	nEm061	Association between gestational PFAS exposure and Children's adiposity in a diverse population	NA	Bloom M.S., Commodore S., Ferguson P.L., Neelon B., Pearce J.L., Baumer A., Newman R.B., Grobman W., Tita A., Roberts J., Skupski D., Palomares K., Nageotte M., Kannan K., Zhang C., Wapner R., Vena J.E., Hunt K.J.	(Bloom M.S., mbloom22@gmu.edu) Department of Global and Community Health, George Mason University, Fairfax, VA, United States. , (Commodore S.) Department of Environmental and Occupational Health, Indiana University, Bloomington, IN, United States. , (Ferguson P.L.; Neelon B.; Pearce J.L.; Vena J.E.; Hunt K.J.) Department of Public Health Sciences, Medical University of South Carolina, Charleston…	M.S. Bloom, Department of Global and Community Health, George Mason University, 4400 University Drive, MS5B7, Fairfax, VA, United States. Email: mbloom22@gmu.edu	NA	2021-08-13	NA	Environmental Research (2022) 203 Article Number: 111820. Date of Publication: 1 Jan 2022	Environmental Research	2022	203	NA	NA	NA	2022-01-01	Article	NA	NA	NA	NA	1096-0953 (electronic),0013-9351	NA	Academic Press Inc.	Perfluoroalkyl substances (PFAS) are widely distributed suspected obesogens that cross the placenta. However, few data are available to assess potential fetal effects of PFAS exposure on children's adiposity in diverse populations. To address the data gap, we estimated associations between gestational PFAS concentrations and childhood adiposity in a diverse mother-child cohort. We considered 6 PF…	NA	Adiposity,Children's health,Health disparities,Obesity,Obesogen,Perfluoroalkyl substances	NA	perfluorodecanoic acid, perfluorononanoic acid, perfluorooctanesulfonic acid, perfluorooctanoic acid	child health, health disparity, obesity	article, body fat, body mass, child, childhood, confounding variable, controlled study, ethnicity, fat free mass, female, first trimester pregnancy, Hispanic, human, human tissue, major clinical study, maternal blood, Pacific Islander, race, tandem mass spectrometry, ultra performance liquid chromatography, waist circumference	NA	NA	NA	NA
n062	nPM062	28755589	Children's environmental health based on birth cohort studies of Asia	Tsai MS, Chen MH, Lin CC, Ng S, Hsieh CJ, Liu CY, Hsieh WS, Chen PC.	Sci Total Environ. 2017 Dec 31;609:396-409. doi: 10.1016/j.scitotenv.2017.07.081. Epub 2017 Jul 26.	Tsai MS	Sci Total Environ	2017	2017-07-30	NA	NA	10.1016/j.scitotenv.2017.07.081	TRUE	nEm375	Children's environmental health based on birth cohort studies of Asia	NA	Tsai M.-S., Chen M.-H., Lin C.-C., Ng S., Hsieh C.-J., Liu C.-Y., Hsieh W.-S., Chen P.-C.	(Tsai M.-S.; Lin C.-C.; Chen P.-C., pchen@ntu.edu.tw) Institute of Occupational Medicine and Industrial Hygiene, National Taiwan University College of Public Health, Taipei, Taiwan. , (Chen M.-H.) Institute of Population Health Sciences, National Health Research Institutes, Miaoli, Taiwan. , (Chen M.-H.; Hsieh W.-S.) Department of Pediatrics, National Taiwan University Hospital and National Taiwa…	P.-C. Chen, Institute of Occupational Medicine and Industrial Hygiene, National Taiwan University College of Public Health, 17 Xuzhou Road, Taipei, Taiwan. Email: pchen@ntu.edu.tw	NA	2017-08-01	2018-08-17	Science of the Total Environment (2017) 609 (396-409). Date of Publication: 31 Dec 2017	Science of the Total Environment	2017	609	NA	396	409	2017-12-31	Article	NA	NA	NA	NA	1879-1026 (electronic),0048-9697	NA	Elsevier B.V.	Numerous studies have explored the associations between environmental pollutants and pediatric health. Recent studies have investigated the issue in Asia, but no systematic review has been published to date. This study aims to elucidate the issue by summarizing relevant epidemiologic evidence for cohorts in Asia, using information from the Birth Cohort Consortium of Asia (BiCCA). Environmental po…	NA	Asia,Birth cohort,Environmental tobacco smoke,Mercury,Perfluoroalkyl substances,Phthalates,Polychlorinated biphenyls	NA	4,4' isopropylidenediphenol, dioxin, environmental, industrial and domestic chemicals, mercury, passive smoking, perfluoroalkyl substance, pesticide, phthalic acid, polybrominated diphenyl ether, polychlorinated biphenyl, tobacco smoke, unclassified drug	child health, environmental health	allergic disease, anthropometric parameters, article, Asia, birth length, birth weight, cohort analysis, endocrine system, environmental exposure, evidence based medicine, fetus, fetus growth, gestational age, head circumference, health hazard, human, immune response, international cooperation, nerve cell differentiation, physical examination, pollutant, pregnancy outcome, priority journal, probl…	NA	NA	NA	NA
n063	nPM063	32959518	Per- and Polyfluoroalkyl Substance Exposure, Gestational Weight Gain, and Postpartum Weight Changes in Project Viva	Mitro SD, Sagiv SK, Rifas-Shiman SL, Calafat AM, Fleisch AF, Jaacks LM, Williams PL, Oken E, James-Todd TM.	Obesity (Silver Spring). 2020 Oct;28(10):1984-1992. doi: 10.1002/oby.22933.	Mitro SD	Obesity (Silver Spring)	2020	2020-09-22	PMC7513422	NIHMS1603412	10.1002/oby.22933	TRUE	nEm187	Per- and Polyfluoroalkyl Substance Exposure, Gestational Weight Gain, and Postpartum Weight Changes in Project Viva	NA	Mitro S.D., Sagiv S.K., Rifas-Shiman S.L., Calafat A.M., Fleisch A.F., Jaacks L.M., Williams P.L., Oken E., James-Todd T.M.	(Mitro S.D., smitro@g.harvard.edu) Population Health Sciences Program, Harvard University, Boston, MA, United States. , (Sagiv S.K.) Department of Epidemiology, Berkeley School of Public Health, University of California, Berkeley, CA, United States. , (Rifas-Shiman S.L.; Oken E.) Division of Chronic Disease Research Across the Lifecourse, Department of Population Medicine, Harvard Medical School …	S.D. Mitro, Population Health Sciences Program, Harvard University, Boston, MA, United States. Email: smitro@g.harvard.edu	NA	2020-09-25	2020-09-29	Obesity (2020) 28:10 (1984-1992). Date of Publication: 1 Oct 2020	Obesity	2020	28	10	1984	1992	2020-10-01	Article	NA	NA	NA	NA	1930-739X (electronic),1930-7381	NA	Blackwell Publishing Inc., Postfach 10 11 61, 69451 Weinheim, Boschstrabe 12, 69469 Weinheim, Deutschland, Germany. subscrip@blackwellpub.com	Objective: The purpose of this study was to test the extent to which pregnancy per- and polyfluoroalkyl substance (PFAS) concentrations were associated with gestational weight gain and postpartum weight changes. Methods: This study was composed of 1,614 women recruited between 1999 and 2002 via the Project Viva cohort with pregnancy plasma concentrations of six PFAS, including perfluorooctanesulf…	NA	NA	environmental chemical, perfluoroalkyl substance, polyfluoroalkyl substance	2 (n ethyl perfluorooctane sulfonamido)acetic acid, perfluorooctanesulfonic acid, perfluorooctanoic acid, unclassified drug	body weight change, gestational weight gain, maternal exposure, maternal obesity, puerperium	adult, article, blood level, body mass, cohort analysis, demography, female, human, mathematical model, prenatal period	NA	NA	NA	NA
n064	nPM064	36343112	Nontarget Identification of Novel Per- and Polyfluoroalkyl Substances in Cord Blood Samples	Xia X, Zheng Y, Tang X, Zhao N, Wang B, Lin H, Lin Y.	Environ Sci Technol. 2022 Dec 6;56(23):17061-17069. doi: 10.1021/acs.est.2c04820. Epub 2022 Nov 7.	Xia X	Environ Sci Technol	2022	2022-11-07	NA	NA	10.1021/acs.est.2c04820	TRUE	nEm003	Nontarget Identification of Novel Per- and Polyfluoroalkyl Substances in Cord Blood Samples	NA	Xia X., Zheng Y., Tang X., Zhao N., Wang B., Lin H., Lin Y.	(Xia X.; Zheng Y., yx_zheng@139.com; Lin H.; Lin Y., yxzheng@qdu.edu.cn) Department of Occupational Health and Environmental Health, School of Public Health, Qingdao University, Qingdao, China. , (Tang X.) Department of Medicinal Chemistry, School of Pharmacy, Qingdao University, Qingdao, China. , (Zhao N.) School of Environmental Science and Engineering, Shandong University, Qingdao, China. , (W…	Y. Zheng, Department of Occupational Health and Environmental Health, School of Public Health, Qingdao University, Qingdao, China. Email: yx_zheng@139.com""Y. Lin, Department of Occupational Health and Environmental Health, School of Public Health, Qingdao University, Qingdao, China. Email: yxzheng@qdu.edu.cn	NA	2022-11-16	2023-01-03	Environmental Science and Technology (2022) 56:23 (17061-17069). Date of Publication: 6 Dec 2022	Environmental Science and Technology	2022	56	23	17061	17069	2022-12-06	Article	NA	NA	NA	NA	1520-5851 (electronic),0013-936X	NA	American Chemical Society	Per- and polyfluoroalkyl substances (PFASs) can penetrate the placental barrier and reach embryos through cord blood, probably causing adverse birth outcomes. Therefore, novel PFASs identification in cord blood and their relationships with birth outcomes are essential to evaluate prenatal exposure risk of PFASs. Herein, 16 legacy and 12 novel PFASs were identified in 326 cord blood samples collec…	NA	emerging contaminants,nontarget screening,per- and polyfluoroalkyl substances,prenatal exposure risk,umbilical cord blood	perfluorohexanesulfonic acid, perfluorooctanoic acid	ether, fipronil, sulfone, sulfuric acid	prenatal exposure, umbilical cord blood	adult, article, birth weight, blood sampling, China, chlorination, data analysis software, embryo, female, human, human tissue, Organisation for Economic Co-operation and Development, qualitative analysis, quality control, quantitative analysis, substitution reaction	NA	NA	NA	NA
n065	nPM065	26880504	The Epidemiology of Pelvic Floor Disorders and Childbirth: An Update	Hallock JL, Handa VL.	Obstet Gynecol Clin North Am. 2016 Mar;43(1):1-13. doi: 10.1016/j.ogc.2015.10.008.	Hallock JL	Obstet Gynecol Clin North Am	2016	2016-02-17	PMC4757815	NIHMS733645	10.1016/j.ogc.2015.10.008	TRUE	nEm449	The Epidemiology of Pelvic Floor Disorders and Childbirth. An Update.	NA	Hallock J.L., Handa V.L.	(Hallock J.L.) Female Pelvic Medicine and Reconstructive Surgery, Johns Hopkins School of Medicine, 4940 Eastern Avenue, 301 Building, Suite 3200, Baltimore, MD, United States. , (Handa V.L., vhanda1@jhmi.edu) Gynecology and Obstetrics, Johns Hopkins School of Medicine, 4940 Eastern Avenue, 301 Building, Suite 3200, Baltimore, MD, United States.	V.L. Handa, Gynecology and Obstetrics, Johns Hopkins School of Medicine, 4940 Eastern Avenue, 301 Building, Suite 3200, Baltimore, MD, United States. Email: vhanda1@jhmi.edu	NA	2016-02-18	2016-02-24	Obstetrics and Gynecology Clinics of North America (2016) 43:1 (1-13). Date of Publication: 1 Mar 2016	Obstetrics and Gynecology Clinics of North America	2016	43	1	1	13	2016-03-01	Review	NA	NA	NA	NA	1558-0474 (electronic),0889-8545	NA	W.B. Saunders	Using a lifespan model, this article presents new scientific findings regarding risk factors for pelvic floor disorders (PFDs), focusing on the role of childbirth in the development of single or multiple coexisting PFDs. Phase I of the model includes predisposing factors, such as genetic predisposition and race. Phase II includes inciting factors, such as obstetric events. Prolapse, urinary incon…	NA	Cesarean section,Childbirth,Fecal incontinence,Pelvic floor disorders,Pelvic organ prolapse,Urinary incontinence,Vaginal delivery	NA	NA	childbirth, pelvic floor disorder (epidemiology)	African American, age, anus sphincter, bariatric surgery, bladder sphincter, body burden, Caucasian, cesarean section, clinical practice, controlled study, cross-sectional study, diet, exercise, family history, feces incontinence (complication, epidemiology), female, genetic predisposition, health care utilization, Hispanic, human, incidence, levator ani muscle, lifespan, medical society, obesity…	NA	NA	NA	NA
n066	nPM066	18565792	Perfluorinated compounds--exposure assessment for the general population in Western countries	Fromme H, Tittlemier SA, VÃ¶lkel W, Wilhelm M, Twardella D.	Int J Hyg Environ Health. 2009 May;212(3):239-70. doi: 10.1016/j.ijheh.2008.04.007. Epub 2008 Jun 18.	Fromme H	Int J Hyg Environ Health	2009	2008-06-21	NA	NA	10.1016/j.ijheh.2008.04.007	TRUE	nEm680	Perfluorinated compounds - Exposure assessment for the general population in western countries	NA	Fromme H., Tittlemier S.A., VÃ¶lkel W., Wilhelm M., Twardella D.	(Fromme H., hermann.fromme@lgl.bayern.de; VÃ¶lkel W.; Twardella D.) Department of Environmental Health, Bavarian Health and Food Safety Authority, VeterinÃ¤rstrasse 2, 85764 Oberschleissheim, Germany. , (Tittlemier S.A.) Food Research Division, Banting Research Centre 2203D, Health Canada, Ottawa, Ont. K1A 0L2, Canada. , (Wilhelm M.) Department of Hygiene, Social and Environmental Medicine, Ruhr-…	H. Fromme, Department of Environmental Health, Bavarian Health and Food Safety Authority, VeterinÃ¤rstrasse 2, 85764 Oberschleissheim, Germany. Email: hermann.fromme@lgl.bayern.de	NA	NA	2009-05-01	International Journal of Hygiene and Environmental Health (2009) 212:3 (239-270). Date of Publication: May 2009	International Journal of Hygiene and Environmental Health	2009	212	3	239	270	2023-05-09	Review	NA	NA	NA	NA	1438-4639,1618-131X (electronic)	NA	Urban und Fischer Verlag Jena, P.O. Box 100537, Jena, Germany.	Perfluorinated compounds (PFCs) can currently be detected in many environmental media and biota, as well as in humans. Because of their persistence and their potential to accumulate they are of toxicological concern. The present review presents the current knowledge of PFC monitoring data in environmental media relevant for human exposure. In this context, PFC concentrations in indoor and ambient…	NA	Biomarkers,House dust,Human biomonitoring,Indoor air,PFC,PFOA,PFOS	fluorocarbon (drug analysis)	NA	environmental exposure (adverse drug reaction, drug analysis), environmental monitoring	adult, air pollutant (drug analysis), breast milk, chemistry, cultural anthropology, female, food contamination (drug analysis), human, review, water pollutant (drug analysis)	NA	NA	NA	NA
n067	nPM067	31955077	Poly- and perfluoroalkyl substance concentrations in human breast milk and their associations with postnatal infant growth	Jin H, Mao L, Xie J, Zhao M, Bai X, Wen J, Shen T, Wu P.	Sci Total Environ. 2020 Apr 15;713:136417. doi: 10.1016/j.scitotenv.2019.136417. Epub 2020 Jan 11.	Jin H	Sci Total Environ	2020	2020-01-20	NA	NA	10.1016/j.scitotenv.2019.136417	TRUE	nEm215	Poly- and perfluoroalkyl substance concentrations in human breast milk and their associations with postnatal infant growth	NA	Jin H., Mao L., Xie J., Zhao M., Bai X., Wen J., Shen T., Wu P.	(Jin H.; Mao L.; Xie J.; Zhao M.) Key Laboratory of Microbial Technology for Industrial Pollution Control of Zhejiang Province, College of Environment, Zhejiang University of Technology, Hangzhou, Zhejiang, China. , (Bai X., baixiaoxia@zju.edu.cn; Wen J.; Shen T.) Department of Obstetrics, Women's Hospital, School of Medicine, Zhejiang University, Hangzhou, Zhejiang, China. , (Wu P.) State Key La…	X. Bai, Department of Obstetrics, Women's Hospital, School of Medicine, Zhejiang University, Hangzhou, Zhejiang, China. Email: baixiaoxia@zju.edu.cn	NA	2020-01-20	2020-01-23	Science of the Total Environment (2020) 713 Article Number: 136417. Date of Publication: 15 Apr 2020	Science of the Total Environment	2020	713	NA	NA	NA	2020-04-15	Article	NA	NA	NA	NA	1879-1026 (electronic),0048-9697	NA	Elsevier B.V.	Perfluoroalkyl carboxylates (PFCAs) and perfluoroalkyl sulfonates are widespread in human breast milk. However, the occurrence of chlorinated polyfluorinated ether sulfonates (Cl-PFESAs) and fluorotelomer alcohols (FTOHs) in breast milk and their effects on postnatal growth of infants through breast milk consumption are still not well known. This study characterized the occurrence of 16 poly- and…	NA	Chlorinated perfluoroalkyl ether sulfonic acid,Human breast milk,Perfluorooctane sulfonate,Postnatal infant growth	perfluoro compound, perfluoroalkyl carboxylate, perfluoroalkyl sulfonate	perfluorohexanoic acid, perfluorooctanesulfonic acid, perfluorooctanoic acid, unclassified drug	breast milk, child growth, postnatal growth	adult, article, body height, body weight gain, breast feeding, Chinese, correlation analysis, female, human, infant, infant nutrition, male, pregnant woman, priority journal	NA	NA	NA	NA
n068	nPM068	33740056	Plasma Concentrations of Per- and Polyfluoroalkyl Substances and Body Composition From Mid-Childhood to Early Adolescence	Janis JA, Rifas-Shiman SL, Seshasayee SM, Sagiv S, Calafat AM, Gold DR, Coull BA, Rosen CJ, Oken E, Fleisch AF.	J Clin Endocrinol Metab. 2021 Aug 18;106(9):e3760-e3770. doi: 10.1210/clinem/dgab187.	Janis JA	J Clin Endocrinol Metab	2021	2021-03-19	PMC8372642	NA	10.1210/clinem/dgab187	TRUE	nEm100	Plasma Concentrations of Per-and Polyfluoroalkyl Substances and Body Composition from Mid-Childhood to Early Adolescence	NA	Janis J.A., Rifas-Shiman S.L., Seshasayee S.M., Sagiv S., Calafat A.M., Gold D.R., Coull B.A., Rosen C.J., Oken E., Fleisch A.F.	(Janis J.A.; Seshasayee S.M.; Fleisch A.F., afleisch@mmc.org) Center for Outcomes Research and Evaluation, Maine Medical Center Research Institute, Portland, ME, United States. , (Rifas-Shiman S.L.; Oken E.) Division of Chronic Disease Research Across the Lifecourse, Department of Population Medicine, Harvard Medical School and Harvard Pilgrim Health Care Institute, Boston, MA, United States. , (…	A.F. Fleisch, Center for Outcomes Research and Evaluation, 509 Forest Avenue, Portland, ME, United States. Email: afleisch@mmc.org	NA	2021-09-10	2021-10-05	Journal of Clinical Endocrinology and Metabolism (2021) 106:9 (E3760-E3770). Date of Publication: 1 Sep 2021	Journal of Clinical Endocrinology and Metabolism	2021	106	9	E3760	E3770	2021-09-01	Article	NA	NA	NA	NA	1945-7197 (electronic),0021-972X	NA	Endocrine Society	Context: Per-and polyfluoroalkyl substances (PFAS) may alter body composition by lowering anabolic hormones and increasing inflammation, but data are limited, particularly in adolescence when body composition is rapidly changing. Objective: To evaluate associations of PFAS plasma concentrations in childhood with change in body composition through early adolescence. Methods: A total of 537 childre…	NA	adolescence,body composition,chemical mixtures,endocrine disrupting chemicals,PFAS	alkyl group, perfluoroalkyl substance, polyfluoroalkyl substance	decanoic acid, perfluorodecanoate acid, perfluorohexanesulfonic acid, perfluorooctanesulfonic acid, perfluorooctanoic acid, unclassified drug	adolescence, blood analysis, body composition, childhood	adult, anthropometric parameters, article, body mass, child, cohort analysis, dual energy X ray absorptiometry, environmental exposure, fat mass, female, human, intra-abdominal fat, lean body weight, male, mass spectrometry, maternal age, Z score	NA	NA	NA	NA
n069	nPM069	32176721	Intrauterine exposure to perfluorinated compounds and overweight at age 4: A case-control study	Martinsson M, Nielsen C, BjÃ¶rk J, Rylander L, Malmqvist E, Lindh C, Rignell-Hydbom A.	PLoS One. 2020 Mar 16;15(3):e0230137. doi: 10.1371/journal.pone.0230137. eCollection 2020.	Martinsson M	PLoS One	2020	2020-03-17	PMC7075550	NA	10.1371/journal.pone.0230137	TRUE	nEm236	Intrauterine exposure to perfluorinated compounds and overweight at age 4: A case-control study	NA	Martinsson M., Nielsen C., BjÃ¶rk J., Rylander L., Malmqvist E., Lindh C., Rignell-Hydbom A.	(Martinsson M.; Nielsen C., christel.nielsen@med.lu.se; BjÃ¶rk J.; Rylander L.; Malmqvist E.; Lindh C.; Rignell-Hydbom A.) Division of Occupational and Environmental Medicine, Lund University, Lund, Sweden.	C. Nielsen, Division of Occupational and Environmental Medicine, Lund University, Lund, Sweden. Email: christel.nielsen@med.lu.se	NA	2020-03-25	2021-09-30	PLoS ONE (2020) 15:3 Article Number: e0230137. Date of Publication: March-2020	PLoS ONE	2020	15	3	NA	NA	2023-03-20	Article	NA	NA	NA	NA	1932-6203 (electronic)	NA	Public Library of Science	Aims The aims were to investigate the association between maternal serum levels of perfluorooctane sulfonate (PFOS), perfluorooctanoic acid (PFOA), perfluorohexane sulfonate (PFHxS) and perfluorononanoic acid (PFNA) in early pregnancy and overweight in the child at 4 years and to assess potential heterogeneity in exposure effect between strata with different levels of other risk factors for overw…	NA	NA	perfluoro compound	perfluorohexanesulfonic acid, perfluorononanoic acid, perfluorooctanesulfonic acid, perfluorooctanoic acid	childhood obesity, prenatal exposure	article, blood level, body mass, case control study, child, controlled study, female, first trimester pregnancy, human, major clinical study, male, maternal serum, risk assessment, risk factor, Sweden	NA	NA	NA	NA
n070	nPM070	26403844	Maternal Exposure to Synthetic Chemicals and Obesity in the Offspring: Recent Findings	Liu Y, Peterson KE.	Curr Environ Health Rep. 2015 Dec;2(4):339-47. doi: 10.1007/s40572-015-0068-6.	Liu Y	Curr Environ Health Rep	2015	2015-09-26	PMC5482496	NIHMS807749	10.1007/s40572-015-0068-6	TRUE	nEm465	Maternal Exposure to Synthetic Chemicals and Obesity in the Offspring: Recent Findings	NA	Liu Y., Peterson K.E.	(Liu Y., yunliu@umich.edu) Department of Nutritional Sciences, University of Michigan School of Public Health, 1415 Washington Heights, 1-1867, Ann Arbor, MI, 48109-2029, USA. , (Peterson K.E.) Department of Nutritional Sciences, University of Michigan School of Public Health, 1415 Washington Heights, 1-1867, Ann Arbor, MI, 48109-2029, USA. karenep@umich.edu, (Peterson K.E.) Center for Human Grow…	NA	NA	NA	2016-06-15	Current environmental health reports (2015) 2:4 (339-347). Date of Publication: 1 Dec 2015	Current environmental health reports	2015	2	4	339	347	2015-12-01	Review	NA	NA	NA	NA	2196-5412 (electronic)	NA	NA	Experimental studies suggest perinatal exposures to synthetic chemicals may be associated with early onset obesity, although this hypothesis has not been extensively examined in humans. This article summarizes the evidence relating maternal perinatal exposure to common persistent organic compounds (polychlorinated biphenyl, dichlorodiphenyldichloroethylene, dichlorodiphenyltrichloroethane, hexach…	NA	Child,Environmental obesogen,Infant growth,Maternal exposure,Obesity,Overweight,Weight gain	NA	chlorinated hydrocarbon (adverse drug reaction), hexachlorobenzene, pollutant	chemically induced, prenatal exposure	adverse event, child, childhood obesity, female, human, maternal exposure, pollutant, pregnancy	NA	NA	NA	NA
n071	nPM071	31271921	Complex relationships between perfluorooctanoate, body mass index, insulin resistance and serum lipids in young girls	Fassler CS, Pinney SE, Xie C, Biro FM, Pinney SM.	Environ Res. 2019 Sep;176:108558. doi: 10.1016/j.envres.2019.108558. Epub 2019 Jun 26.	Fassler CS	Environ Res	2019	2019-07-05	PMC6739842	NIHMS1533350	10.1016/j.envres.2019.108558	TRUE	nEm259	Complex relationships between perfluorooctanoate, body mass index, insulin resistance and serum lipids in young girls	NA	Fassler C.S., Pinney S.E., Xie C., Biro F.M., Pinney S.M.	(Fassler C.S., shimpcl@mail.uc.edu; Xie C., changchun.xie@uc.edu; Pinney S.M., susan.pinney@uc.edu) University of Cincinnati College of Medicine, Department of Environmental Health, Cincinnati, OH, United States. , (Pinney S.E., pinneys@email.chop.edu) Children's Hospital of Philadelphia, Philadelphia, PA, United States. , (Pinney S.E., pinneys@email.chop.edu) University of Pennsylvania Perelman …	S.M. Pinney, University of Cincinnati College of Medicine, Department of Environmental Health, Cincinnati, OH, United States. Email: susan.pinney@uc.edu	NA	2019-07-09	2019-07-11	Environmental Research (2019) 176 Article Number: 108558. Date of Publication: 1 Sep 2019	Environmental Research	2019	176	NA	NA	NA	2019-09-01	Article	NA	NA	NA	NA	1096-0953 (electronic),0013-9351	NA	Academic Press Inc., apjcs@harcourt.com	Background: Perfluorooctanoate (PFOA) has been used extensively in the manufacture of both commercial and household products. PFOA serum concentrations have been associated with adverse health effects, including lower body mass in children and infants. Objective: To determine if there is an association between serum PFOA concentration and body mass, serum insulin and lipid profile in exposed youn…	NA	Children,Cholesterol,Insulin resistance,Perfluorooctanoate,Structural equation modeling	insulin, lipid (endogenous compound), perfluorooctanoic acid	high density lipoprotein cholesterol	body mass, insulin blood level, insulin resistance, lipid blood level	article, child, domestic waste, fat mass, female, hip circumference, homeostasis model assessment, human, insulin sensitivity, priority journal, puberty, sexual maturation, structural equation modeling, waist circumference, waist hip ratio, waist to height ratio, waste	NA	NA	NA	NA
n072	nPM072	34858347	Life-Time Environmental Chemical Exposure and Obesity: Review of Epidemiological Studies Using Human Biomonitoring Methods	Mohanto NC, Ito Y, Kato S, Kamijima M.	Front Endocrinol (Lausanne). 2021 Nov 11;12:778737. doi: 10.3389/fendo.2021.778737. eCollection 2021.	Mohanto NC	Front Endocrinol (Lausanne)	2021	2021-12-03	PMC8632231	NA	10.3389/fendo.2021.778737	TRUE	nEm082	Life-Time Environmental Chemical Exposure and Obesity: Review of Epidemiological Studies Using Human Biomonitoring Methods	NA	Mohanto N.C., Ito Y., Kato S., Kamijima M.	(Mohanto N.C.; Ito Y., yukey@med.nagoya-cu.ac.jp; Kato S.; Kamijima M.) Department of Occupational and Environmental Health, Nagoya City University Graduate School of Medical Sciences, Nagoya, Japan.	Y. Ito, Department of Occupational and Environmental Health, Nagoya City University Graduate School of Medical Sciences, Nagoya, Japan. Email: yukey@med.nagoya-cu.ac.jp	NA	2021-12-07	2021-12-15	Frontiers in Endocrinology (2021) 12 Article Number: 778737. Date of Publication: 11 Nov 2021	Frontiers in Endocrinology	2021	12	NA	NA	NA	2021-11-11	Review	NA	NA	NA	NA	1664-2392 (electronic)	NA	Frontiers Media S.A.	The exponential global increase in the incidence of obesity may be partly attributable to environmental chemical (EC) exposure. Humans are constantly exposed to ECs, primarily through environmental components. This review compiled human epidemiological study findings of associations between blood and/or urinary exposure levels of ECs and anthropometric overweight and obesity indices. The findings…	NA	bisphenols,environmental chemicals,environmental obesogens,human biomonitoring,obesity,overweight,persistent organic pollutants,phthalates	environmental chemical	4,4' isopropylidenediphenol, chemical compound, dichlorodiphenyldichloroethylene, perfluorooctanoic acid, phenol, phthalic acid, phthalic acid 2 ethylhexyl monoester, phthalic acid benzyl butyl ester, phthalic acid diethyl ester, unclassified drug	biological monitoring, environmental exposure, obesity	anthropometry, body fat, body mass, cardiometabolic risk, diabetes mellitus, dietary intake, fat mass, fatty liver, food intake, human, inflammation, maternal exposure, metabolic syndrome X, occupational exposure, ovary polycystic disease, particulate matter, persistent organic pollutant, physical activity, pregnancy, prenatal exposure, prostate cancer, review, sperm quality, waist circumference	NA	NA	NA	NA
n073	nPM073	33971603	Per and polyfluoroalkyl substances (PFAS) at high concentrations in neonatal Australian pinnipeds	Taylor S, Terkildsen M, Stevenson G, de Araujo J, Yu C, Yates A, McIntosh RR, Gray R.	Sci Total Environ. 2021 Sep 10;786:147446. doi: 10.1016/j.scitotenv.2021.147446. Epub 2021 Apr 30.	Taylor S	Sci Total Environ	2021	2021-05-10	NA	NA	10.1016/j.scitotenv.2021.147446	TRUE	nEm093	Per and polyfluoroalkyl substances (PFAS) at high concentrations in neonatal Australian pinnipeds	NA	Taylor S., Terkildsen M., Stevenson G., de Araujo J., Yu C., Yates A., McIntosh R.R., Gray R.	(Taylor S., stay8725@uni.sydney.edu.au; Gray R., rachael.gray@sydney.edu.au) Sydney School of Veterinary Science, Faculty of Science, The University of Sydney, Camperdown, NSW, Australia. , (Terkildsen M., mike.terkildsen@gmail.com) Sydney, NSW, Australia. , (Stevenson G., Gavin.Stevenson@measurement.gov.au; de Araujo J.; Yu C.; Yates A., Alan.Yates@measurement.gov.au) Australian Ultra-Trace Labo…	R. Gray, McMaster Building/B14 Sydney School of Veterinary Science, The University of Sydney, Camperdown, NSW, Australia. Email: rachael.gray@sydney.edu.au	NA	2021-05-14	2021-10-05	Science of the Total Environment (2021) 786 Article Number: 147446. Date of Publication: 10 Sep 2021	Science of the Total Environment	2021	786	NA	NA	NA	2021-09-10	Article	NA	NA	NA	NA	1879-1026 (electronic),0048-9697	NA	Elsevier B.V.	Per and polyfluorinated substances (PFAS) exposure was investigated in Australian pinnipeds. Concentrations of 16 PFAS were measured in the livers of Australian sea lion (Neophoca cinerea), Australian fur seal (Arctocephalus pusillus doriferus) and a long-nosed Fur Seal (Arctocephalus forsteri) pup sampled between 2017 and 2020 from colonies in South Australia and Victoria. Findings reported in t…	NA	Australia,Neonatal,Per and polyfluorinated substances,Pinniped,Pollution,Toxicant	chemical compound, perpolyfluorinated substance, polyfluorinated substance	perfluorononanoic acid, perfluorooctanesulfonic acid, perfluorooctanoic acid, unclassified drug	NA	adult, Arctocephalus forsteri, Arctocephalus pusillus doriferus, article, climate change, concentration (parameter), controlled study, environmental exposure, environmental impact, food web, male, marine environment, Neophoca cinerea, newborn, nonhuman, Northern Hemisphere, Pinnipedia, South Australia	NA	NA	NA	NA
n074	nPM074	33181449	Per- and polyfluoroalkyl substance mixtures and gestational weight gain among mothers in the Health Outcomes and Measures of the Environment study	Romano ME, Gallagher LG, Eliot MN, Calafat AM, Chen A, Yolton K, Lanphear B, Braun JM.	Int J Hyg Environ Health. 2021 Jan;231:113660. doi: 10.1016/j.ijheh.2020.113660. Epub 2020 Nov 9.	Romano ME	Int J Hyg Environ Health	2021	2020-11-12	PMC7799649	NIHMS1645417	10.1016/j.ijheh.2020.113660	TRUE	nEm170	Per- and polyfluoroalkyl substance mixtures and gestational weight gain among mothers in the Health Outcomes and Measures of the Environment study	NA	Romano M.E., Gallagher L.G., Eliot M.N., Calafat A.M., Chen A., Yolton K., Lanphear B., Braun J.M.	(Romano M.E., Megan.E.Romano@dartmouth.edu; Gallagher L.G.) Department of Epidemiology, Geisel School of Medicine, Dartmouth College, NH, Hanover, United States. , (Eliot M.N.; Braun J.M.) Department of Epidemiology, Brown University, Providence, RI, USA, (Calafat A.M.) Division of Laboratory Sciences, Centers for Disease Control and Prevention, Atlanta, United States. , (Chen A.) Department of B…	NA	NA	2020-11-20	2021-12-15	International journal of hygiene and environmental health (2021) 231 (113660). Date of Publication: 1 Jan 2021	International journal of hygiene and environmental health	2021	231	NA	113660	NA	2021-01-01	Article	NA	NA	NA	NA	1618-131X (electronic)	NA	NLM (Medline)	BACKGROUND: Per- and polyfluoroalkyl substances (PFAS) are environmentally persistent chemicals commonly used in the production of household and consumer goods. While exposure to PFAS has been associated with greater adiposity in children and adults, less is known about associations with gestational weight gain (GWG). METHODS: We quantified using mass spectrometry perfluorooctanoate (PFOA), perfl…	NA	Cohort,Gestational weight gain,PFAS,Serum	fluorocarbon	NA	gestational weight gain, pollutant	adult, child, female, human, mother, pregnancy, prospective study	NA	NA	NA	NA
n075	nPM075	35914335	Prenatal and early postnatal exposure to perfluoroalkyl substances and bone mineral content and density in the Odense child cohort	HÃ¸jsager FD, Andersen M, Juul A, Nielsen F, MÃ¶ller S, Christensen HT, GrÃ¸ntved A, Grandjean P, Jensen TK.	Environ Int. 2022 Sep;167:107417. doi: 10.1016/j.envint.2022.107417. Epub 2022 Jul 16.	HÃ¸jsager FD	Environ Int	2022	2022-08-01	NA	NA	10.1016/j.envint.2022.107417	TRUE	nEm029	Prenatal and early postnatal exposure to perfluoroalkyl substances and bone mineral content and density in the Odense child cohort	NA	HÃ¸jsager F.D., Andersen M., Juul A., Nielsen F., MÃ¶ller S., Christensen H.T., GrÃ¸ntved A., Grandjean P., Jensen T.K.	(HÃ¸jsager F.D., frdh@health.sdu.dk; Nielsen F.; Grandjean P.; Jensen T.K.) Department of Clinical Pharmacology, Pharmacy and Environmental Medicine, Institute of Public Health, University of Southern Denmark, J.B. WinslÃ¸wsvej 17A, Odense, Denmark. , (Andersen M.) Department of Endocrinology and Metabolism, Odense University, Denmark. , (Andersen M.) Institute of Clinical Research, Faculty of He…	F.D. HÃ¸jsager, Department of Clinical Pharmacology, Pharmacy and Environmental Medicine, Institute of Public Health, University of Southern Denmark, J.B. WinslÃ¸wsvej 17A, Odense, Denmark. Email: frdh@health.sdu.dk	NA	2022-08-08	2022-09-08	Environment International (2022) 167 Article Number: 107417. Date of Publication: 1 Sep 2022	Environment International	2022	167	NA	NA	NA	2022-09-01	Article	NA	NA	NA	NA	1873-6750 (electronic),0160-4120	NA	Elsevier Ltd	Introduction: Exposure to perfluoroalkyl substances (PFAS) has been associated with lower bone mineral density (BMD) in animal and human studies, but prospective data from children are limited. Objectives: To determine associations between prenatal and early postnatal PFAS exposure and BMD at age 7 years. Methods: In the Odense Child Cohort, Denmark, pregnant women were recruited in 2010â€“2012, …	NA	Bone mineral density,Children,Endocrine disruptors,Environmental epidemiology,Perfluoroalkyl substances	perfluorodecanoic acid, perfluorohexanesulfonic acid, perfluorononanoic acid, perfluorooctanesulfonic acid, perfluorooctanoic acid	NA	bone density, bone mineral, perinatal exposure, prenatal exposure	article, body composition, bone mass, breast feeding, child, cohort analysis, controlled study, Denmark, directed acyclic graph, dual energy X ray absorptiometry, female, gestation period, human, incidence, liquid chromatography-mass spectrometry, male, medical examination, pregnant woman, preschool child, prospective study, school child, structural equation modeling	NA	NA	NA	NA
n076	nPM076	33683001	Perfluorotridecanoic acid inhibits fetal Leydig cell differentiation after in utero exposure in rats via increasing oxidative stress and autophagy	Li C, Zou C, Yan H, Li Z, Li Y, Pan P, Ma F, Yu Y, Wang Y, Wen Z, Ge RS.	Environ Toxicol. 2021 Jun;36(6):1206-1216. doi: 10.1002/tox.23119. Epub 2021 Mar 8.	Li C	Environ Toxicol	2021	2021-03-08	NA	NA	10.1002/tox.23119	TRUE	nEm124	Perfluorotridecanoic acid inhibits fetal Leydig cell differentiation after in utero exposure in rats via increasing oxidative stress and autophagy	NA	Li C., Zou C., Yan H., Li Z., Li Y., Pan P., Ma F., Yu Y., Wang Y., Wen Z., Ge R.-S.	(Li C.; Yan H.; Li Z.; Li Y.; Ma F.; Yu Y.; Wang Y.) Department of Anesthesiology, The Second Affiliated Hospital and Yuying Children's Hospital of Wenzhou Medical University, Zhejiang, China. , (Zou C.; Pan P.; Wen Z.; Ge R.-S., r_ge@yahoo.com) Department of Obstetrics and Gynecology, The Second Affiliated Hospital and Yuying Children's Hospital of Wenzhou Medical University, Wenzhou, Zhejiang, …	R.-S. Ge, Department of Obstetrics and Gynecology, The Second Affiliated Hospital and Yuying Children's Hospital of Wenzhou Medical University, Wenzhou, Zhejiang, China. Email: r_ge@yahoo.com	NA	2021-03-16	2021-03-16	Environmental Toxicology (2021) 36:6 (1206-1216). Date of Publication: 1 Jun 2021	Environmental Toxicology	2021	36	6	1206	1216	2021-06-01	Article	NA	NA	NA	NA	1522-7278 (electronic),1520-4081	NA	John Wiley and Sons Inc	Perfluorotridecanoic acid (PFTrDA) is a long-chain perfluoroalkyl substance, and its effect on the differentiation of fetal Leydig cells remains unclear. The objective of this study is to explore the effect of in utero PFTrDA exposure on the differentiation of fetal Leydig cells and investigate its underlying mechanisms. Pregnant Spragueâ€“Dawley female rats were daily administered by gavage of P…	NA	fetal Leydig cells,insulin-like 3,perfluorotridecanoic acid,steroidogenesis enzyme,testosterone	perfluoro compound (drug toxicity), perfluorotridecanoic acid (drug toxicity)	beclin 1 (endogenous compound), catalase (endogenous compound), cholesterol monooxygenase (side chain cleaving) (endogenous compound), complementary DNA (endogenous compound), copper zinc superoxide dismutase (endogenous compound), cycline (endogenous compound), cytochrome P450 (endogenous compound), cytochrome P450 17a1 (endogenous compound), dhh protein (endogenous compound), glutathione peroxi…	autophagy (cellular), cell differentiation, fetus cell, Leydig cell, oxidative stress, prenatal exposure	adult, animal cell, animal experiment, animal tissue, anogenital distance, article, birth, body weight, cell aggregation, cell count, controlled study, down regulation, female, fluorescence microscope, fluorescence microscopy, male, nonhuman, priority journal, protein analyzer, protein determination, protein expression, protein phosphorylation, rat, regulatory mechanism, spectrophotometer, steroi…	NA	NA	NA	NA
n077	nPM077	36214631	PFOA-Induced Ovotoxicity Differs Between Lean and Obese Mice With Impacts on Ovarian Reproductive and DNA Damage Sensing and Repair Proteins	EstefanÃ­a GonzÃ¡lez-Alvarez M, Severin A, Sayadi M, Keating AF.	Toxicol Sci. 2022 Nov 23;190(2):173-188. doi: 10.1093/toxsci/kfac104.	EstefanÃ­a GonzÃ¡lez-Alvarez M	Toxicol Sci	2022	2022-10-10	PMC9789752	NA	10.1093/toxsci/kfac104	TRUE	nEm011	PFOA-Induced Ovotoxicity Differs Between Lean and Obese Mice With Impacts on Ovarian Reproductive and DNA Damage Sensing and Repair Proteins	NA	EstefanÃ­a GonzÃ¡lez-Alvarez M., Severin A., Sayadi M., Keating A.F.	(EstefanÃ­a GonzÃ¡lez-Alvarez M.; Severin A.; Sayadi M.; Keating A.F.) Department of Animal Science and Interdepartmental Toxicology Graduate Program, Iowa State University, Ames, IA, United States.	NA	NA	2022-10-14	2022-12-05	Toxicological sciences : an official journal of the Society of Toxicology (2022) 190:2 (173-188). Date of Publication: 23 Nov 2022	Toxicological sciences : an official journal of the Society of Toxicology	2022	190	2	173	188	2022-11-23	Article	NA	NA	NA	NA	1096-0929 (electronic)	NA	NLM (Medline)	Perfluorooctanoic acid (PFOA) is an environmentally persistent perfluoroalkyl substance that is widely used in consumer products. Exposure to PFOA is associated with reproductive and developmental effects including endocrine disruption, delayed puberty in girls, and decreased fetal growth. In the United States, obesity affects 40% of women and 20% of girls, with higher rates in minority females. …	NA	DNA damage sensing and repair,obesity,ovarian proteome,ovary,PFOA,reproduction	fluorocarbon	perfluorooctanoic acid	NA	animal, DNA damage, female, metabolism, mouse, mouse mutant, obesity, ovary, reproduction	NA	NA	NA	NA
n078	nPM078	33418195	Gestational and childhood exposure to per- and polyfluoroalkyl substances and cardiometabolic risk at age 12 years	Li N, Liu Y, Papandonatos GD, Calafat AM, Eaton CB, Kelsey KT, Cecil KM, Kalkwarf HJ, Yolton K, Lanphear BP, Chen A, Braun JM.	Environ Int. 2021 Feb;147:106344. doi: 10.1016/j.envint.2020.106344. Epub 2021 Jan 6.	Li N	Environ Int	2021	2021-01-08	PMC7856172	NIHMS1659076	10.1016/j.envint.2020.106344	TRUE	nEm156	Gestational and childhood exposure to per- and polyfluoroalkyl substances and cardiometabolic risk at age 12 years	NA	Li N., Liu Y., Papandonatos G.D., Calafat A.M., Eaton C.B., Kelsey K.T., Cecil K.M., Kalkwarf H.J., Yolton K., Lanphear B.P., Chen A., Braun J.M.	(Li N., nan_li1@brown.edu; Liu Y., yun_liu@brown.edu; Eaton C.B., charles_eaton@brown.edu; Kelsey K.T., karl_kelsey@brown.edu; Braun J.M., joseph_braun_1@brown.edu) Department of Epidemiology, School of Public Health, Brown University, Providence, Rhode Island, United States. , (Papandonatos G.D., gdp@stat.brown.edu) Department of Biostatistics, School of Public Health, Brown University, Providen…	N. Li, Brown University, Box G-S121-2, Providence, RI, United States. Email: nan_li1@brown.edu	NA	2021-01-14	2021-01-20	Environment International (2021) 147 Article Number: 106344. Date of Publication: 1 Feb 2021	Environment International	2021	147	NA	NA	NA	2021-02-01	Article	NA	NA	NA	NA	1873-6750 (electronic),0160-4120	NA	Elsevier Ltd	Background: Per- and polyfluoroalkyl substances (PFAS) may adversely influence cardiometabolic risk. However, few studies have examined if the timing of early life PFAS exposure modifies their relation to cardiometabolic risk. We examined the influence of gestational and childhood PFAS exposure on adolescentsâ€™ cardiometabolic risk. Methods: We quantified concentrations of four PFAS (perfluorooc…	NA	Adolescents,Cardiometabolic risk,PFAS	perfluorohexanesulfonic acid, perfluorononanoic acid, perfluorooctanesulfonic acid, perfluorooctanoic acid	adiponectin (endogenous compound), glucose (endogenous compound), high density lipoprotein (endogenous compound), insulin (endogenous compound), leptin (endogenous compound), triacylglycerol (endogenous compound)	cardiometabolic risk, childhood, environmental exposure, gestation period	age, article, blood analysis, blood level, blood sampling, child, cohort analysis, concentration (parameter), diastolic blood pressure, disease association, dual energy X ray absorptiometry, fasting, female, HOMA index, human, male, newborn, normal human, Ohio, perinatal period, physical examination, preschool child, priority journal, quantitative analysis, risk assessment, school child, sex diff…	NA	NA	NA	NA
n079	nPM079	29758015	Determinants and Temporal Trends of Perfluoroalkyl Substances in Pregnant Women: The Hokkaido Study on Environment and Children's Health	Tsai MS, Miyashita C, Araki A, Itoh S, Bamai YA, Goudarzi H, Okada E, Kashino I, Matsuura H, Kishi R.	Int J Environ Res Public Health. 2018 May 14;15(5):989. doi: 10.3390/ijerph15050989.	Tsai MS	Int J Environ Res Public Health	2018	2018-05-15	PMC5982028	NA	10.3390/ijerph15050989	TRUE	nEm348	Determinants and temporal trends of perfluoroalkyl substances in pregnant women: The Hokkaido study on environment and childrenâ€™s health	NA	Tsai M.-S., Miyashita C., Araki A., Itoh S., Bamai Y.A., Goudarzi H., Okada E., Kashino I., Matsuura H., Kishi R.	(Tsai M.-S., ms.tsai1006@gmail.com; Miyashita C., miyasita@med.hokudai.ac.jp; Araki A., AAraki@cehs.hokudai.ac.jp; Itoh S., vzbghjn@den.hokudai.ac.jp; Bamai Y.A., u-aitbamai@med.hokudai.ac.jp; Goudarzi H., ghouman@cehs.hokudai.ac.jp; Kishi R., rkishi@med.hokudai.ac.jp) Center for Environmental and Health Sciences, Hokkaido University, Sapporo, Japan. , (Tsai M.-S., ms.tsai1006@gmail.com; Araki A.…	R. Kishi, Center for Environmental and Health Sciences, Hokkaido University, Sapporo, Japan. Email: rkishi@med.hokudai.ac.jp	NA	2018-05-24	2018-05-28	International Journal of Environmental Research and Public Health (2018) 15:5 Article Number: 989. Date of Publication: 14 May 2018	International Journal of Environmental Research and Public Health	2018	15	5	NA	NA	2018-05-14	Article	NA	NA	NA	NA	1660-4601 (electronic),1661-7827	NA	MDPI AG, Postfach, Basel, Switzerland. indexing@mdpi.com	Perfluoroalkyl substances (PFAS) are persistent bio-accumulative chemicals that impact the health of pregnant women and their children. PFAS derive from environmental and consumer products, which depend on human lifestyle, socioeconomic characteristics, and time variation. Here, we aimed to explore the temporal trends of PFAS in pregnant women and the characteristics related to maternal PFAS conc…	NA	Perfluoroalkyl substances,Pregnant women,Temporal trends	perfluoro compound, perfluoroalkyl substance	cotinine, perfluorododecanoic acid, perfluorooctanesulfonic acid, perfluorotridecanoic acid, perfluoroundecanoic acid, unclassified drug	pregnant woman	adult, alcohol consumption, article, blood level, blood sampling, body mass, chemical analysis, child health, concentration (parameter), educational status, environmental exposure, environmental health, female, household income, human, Japan, maternal age, maternal smoking, multipara, third trimester pregnancy, time, trend study, triple quadrupole mass spectrometry, ultra performance liquid chrom…	NA	NA	NA	NA
n080	nPM080	29660612	Perfluoroalkyl substances and glycemic status in pregnant Danish women: The Odense Child Cohort	Jensen RC, Glintborg D, Timmermann CAG, Nielsen F, Kyhl HB, Andersen HR, Grandjean P, Jensen TK, Andersen M.	Environ Int. 2018 Jul;116:101-107. doi: 10.1016/j.envint.2018.04.010. Epub 2018 Apr 13.	Jensen RC	Environ Int	2018	2018-04-17	NA	NA	10.1016/j.envint.2018.04.010	TRUE	nEm334	Perfluoroalkyl substances and glycemic status in pregnant Danish women: The Odense Child Cohort	NA	Jensen R.C., Glintborg D., Timmermann C.A.G., Nielsen F., Kyhl H.B., Andersen H.R., Grandjean P., Jensen T.K., Andersen M.	(Jensen R.C., rcjensen@health.sdu.dk; Timmermann C.A.G.; Nielsen F.; Andersen H.R.; Grandjean P.; Jensen T.K.) Department of Environmental Medicine, University of Southern Denmark, J.B.WinslÃ¸wsvej 17A, Odense C, Denmark. , (Jensen R.C., rcjensen@health.sdu.dk; Glintborg D.; Andersen M.) Department of Endocrinology, Odense University Hospital, KlÃ¸vervÃ¦nget 6, Odense C, Denmark. , (Kyhl H.B.; Je…	R.C. Jensen, Department of Environmental Medicine, University of Southern Denmark, J.B. WinslÃ¸ws Vej 17A, 2, Odense C, Denmark. Email: rcjensen@health.sdu.dk	NA	2018-04-26	2020-12-11	Environment International (2018) 116 (101-107). Date of Publication: 1 Jul 2018	Environment International	2018	116	NA	101	107	2018-07-01	Article	NA	NA	NA	NA	1873-6750 (electronic),0160-4120	NA	Elsevier Ltd	Background: Perfluoroalkyl substances (PFASs) are persistent chemicals with suspected endocrine disrupting abilities applied in consumer products. PFASs have potentially modulating effects on glucose homeostasis. Insulin resistance prevails during third trimester of pregnancy, and this challenge of glucose homeostasis may reveal putative effects of PFAS concentrations on glycemic status. Objectiv…	NA	Glycemic status,Odense Child Cohort,Oral glucose tolerance test,Perfluoroalkyl substances,Pregnancy	perfluorodecanoic acid, perfluorohexanesulfonic acid, perfluorononanoic acid, perfluorooctanesulfonic acid, perfluorooctanoic acid	C peptide (endogenous compound), glucose (endogenous compound), insulin (endogenous compound)	glucose blood level, pregnancy diabetes mellitus (diagnosis), pregnant woman	adult, article, blood level, body mass, cell function, controlled study, Denmark, disease association, education, female, gestational age, high risk pregnancy, homeostasis model assessment, human, insulin blood level, insulin sensitivity, low risk patient, major clinical study, oral glucose tolerance test, pancreas islet beta cell, parity, priority journal, prospective study	NA	NA	NA	NA
n081	nPM081	34952085	Prenatal and postnatal exposure to emerging and legacy per-/polyfluoroalkyl substances: Levels and transfer in maternal serum, cord serum, and breast milk	Zheng P, Liu Y, An Q, Yang X, Yin S, Ma LQ, Liu W.	Sci Total Environ. 2022 Mar 15;812:152446. doi: 10.1016/j.scitotenv.2021.152446. Epub 2021 Dec 21.	Zheng P	Sci Total Environ	2022	2021-12-24	NA	NA	10.1016/j.scitotenv.2021.152446	TRUE	nEm049	Prenatal and postnatal exposure to emerging and legacy per-/polyfluoroalkyl substances: Levels and transfer in maternal serum, cord serum, and breast milk	NA	Zheng P., Liu Y., An Q., Yang X., Yin S., Ma L.Q., Liu W.	(Zheng P.; Liu Y.; An Q.; Yang X.; Liu W., wliu@zju.edu.cn) MOE Key Lab. of Environmental Remediation and Ecosystem Health, Institute of Environmental Health, College of Environmental and Resource Sciences, Zhejiang University, Hangzhou, China. , (Yin S.; Liu W., wliu@zju.edu.cn) Zhejiang Province (ZJP) Key Lab. of Pollution Exposure and Health Intervention, Interdisciplinary Research Academy (IR…	W. Liu, ZJP Key Lab. of Pollution Exposure and Health Intervention Technology, Interdisciplinary Research Academy (IRA), Zhejiang Shuren University, Hangzhou, China. Email: wliu@zju.edu.cn	NA	2022-01-06	2022-01-13	Science of the Total Environment (2022) 812 Article Number: 152446. Date of Publication: 15 Mar 2022	Science of the Total Environment	2022	812	NA	NA	NA	2022-03-15	Article	NA	NA	NA	NA	1879-1026 (electronic),0048-9697	NA	Elsevier B.V.	Gestation and lactation are critical and vulnerable stages for fetuses and newborns. During these periods, per-/polyfluoroalkyl substances (PFASs) accumulated in mothers can be transferred to newborns through placenta and/or breastfeeding, causing potential health risks. To investigate the pre- and postnatal PFAS exposure of newborns, we analyzed 21 emerging and legacy PFASs in 60 sets of matched…	NA	Per-/polyfluoroalkyl substances,PFAS alternatives,Postnatal exposure,Prenatal exposure,Transfer efficiency	chlorinated polyfluorinated ether sulfonic acid derivative, fluorotelomer phosphate diester, organophosphate, perfluorooctanesulfonic acid, perfluorooctanoic acid, sulfonic acid derivative	unclassified drug	breast milk, cord serum, maternal serum, perinatal exposure, prenatal exposure	anthropometric parameters, article, birth weight, body mass, breast feeding, concentration (parameter), controlled study, female, high performance liquid chromatography, human, limit of quantitation, newborn, placental transfer, ponderal index, population research, pregnant woman, quadrupole mass spectrometry, quality control, questionnaire, signal noise ratio, smoking habit, ultra performance li…	NA	NA	NA	NA
n082	nPM082	33218772	Early-life perfluorooctanoic acid exposure induces obesity in male offspring and the intervention role of chlorogenic acid	Shao W, Xu J, Xu C, Weng Z, Liu Q, Zhang X, Liang J, Li W, Zhang Y, Jiang Z, Gu A.	Environ Pollut. 2021 Mar 1;272:115974. doi: 10.1016/j.envpol.2020.115974. Epub 2020 Nov 4.	Shao W	Environ Pollut	2021	2020-11-21	NA	NA	10.1016/j.envpol.2020.115974	TRUE	nEm145	Early-life perfluorooctanoic acid exposure induces obesity in male offspring and the intervention role of chlorogenic acid	NA	Shao W., Xu J., Xu C., Weng Z., Liu Q., Zhang X., Liang J., Li W., Zhang Y., Jiang Z., Gu A.	(Shao W.; Xu J.; Xu C.; Weng Z.; Liu Q.; Zhang X.; Liang J.; Li W.; Zhang Y.; Gu A., aihuagu@njmu.edu.cn) State Key Laboratory of Reproductive Medicine, School of Public Health, Nanjing Medical University, Nanjing, China. , (Shao W.; Xu J.; Xu C.; Weng Z.; Liu Q.; Zhang X.; Liang J.; Li W.; Zhang Y.; Gu A., aihuagu@njmu.edu.cn) Key Laboratory of Modern Toxicology of Ministry of Education, Center …	A. Gu, School of Public Health, Nanjing Medical University, Nanjing, China. Email: aihuagu@njmu.edu.cn	NA	2020-11-25	2021-07-06	Environmental Pollution (2021) 272 Article Number: 115974. Date of Publication: 1 Mar 2021	Environmental Pollution	2021	272	NA	NA	NA	2021-03-01	Article	NA	NA	NA	NA	1873-6424 (electronic),0269-7491	NA	Elsevier Ltd	Chlorogenic acid (CGA) ameliorates gestational PFOA exposure induced obesity and metabolic disorder in male oï¬€spring.	Perfluorooctanoic acid (PFOA) is an emerging organic pollutant (EOP) hazardous to human health. Effects of maternal PFOA exposure on offspring as well as the underlying mechanisms remain unclear. In this study, ICR mouse models of gestational low PFOA exposure (0.05 mg/kg/day) were established to investigate the roles on metabolic disorders of offspring. Body weight, body composition, hepatic lip…	Chlorogenic acid,Gestational exposure,Metabolic disorder,Obesity,Perfluorooctanoic acid	chlorogenic acid, perfluorooctanoic acid	acylcarnitine (endogenous compound), alanine aminotransferase (endogenous compound), alkaline phosphatase (endogenous compound), aspartate aminotransferase (endogenous compound), CD14 antigen (endogenous compound), claudin 1 (endogenous compound), claudin 5 (endogenous compound), connexin 43 (endogenous compound), cryopyrin (endogenous compound), diacylglycerol (endogenous compound), fatty acid b…	obesity (therapy), progeny	alanine aminotransferase blood level, alkaline phosphatase blood level, animal experiment, animal model, animal tissue, aspartate aminotransferase blood level, body composition, body weight, controlled study, disorders of lipid and lipoprotein metabolism, energy metabolism, enteritis, Fabp1 gene, Fabp2 gene, Fabp3 gene, gene, gene expression, hepatitis, intestine mucosa permeability, lipid liver …	NA	NA	NA	NA
n083	nPM083	34203907	PFOS Inhibited Normal Functional Development of Placenta Cells via PPARÎ³ Signaling	Li J, Quan X, Lei S, Huang Z, Wang Q, Xu P.	Biomedicines. 2021 Jun 15;9(6):677. doi: 10.3390/biomedicines9060677.	Li J	Biomedicines	2021	2021-07-02	PMC8232579	NA	10.3390/biomedicines9060677	FALSE	NA	NA	NA	NA	NA	NA	NA	NA	NA	NA	NA	NA	NA	NA	NA	NA	NA	NA	NA	NA	NA	NA	NA	NA	NA	NA	NA	NA	NA	NA	NA	NA	NA	NA	NA	NA
n084	nPM084	24238303	The association between PFOA, PFOS and serum lipid levels in adolescents	Geiger SD, Xiao J, Ducatman A, Frisbee S, Innes K, Shankar A.	Chemosphere. 2014 Mar;98:78-83. doi: 10.1016/j.chemosphere.2013.10.005. Epub 2013 Nov 13.	Geiger SD	Chemosphere	2014	2013-11-19	NA	NA	10.1016/j.chemosphere.2013.10.005	TRUE	nEm526	The association between PFOA, PFOS and serum lipid levels in adolescents	NA	Geiger S.D., Xiao J., Ducatman A., Frisbee S., Innes K., Shankar A.	(Geiger S.D., Geiger@niu.edu) Department of Public Health and Health Education, Northern Illinois University, School of Nursing and Health Studies, DeKalb, IL 60115, United States. , (Xiao J.) Registration and Records, North Carolina State University, Raleigh, NC 27695, United States. , (Ducatman A.; Frisbee S.; Innes K.; Shankar A.) Department of Epidemiology, West Virginia University School of …	S.D. Geiger, Department of Public Health, Northern Illinois University School of Nursing and Health Studies, 255 Wirtz Hall, DeKalb, IL 60115, United States. Email: Geiger@niu.edu	NA	2013-11-18	2020-07-13	Chemosphere (2014) 98 (78-83). Date of Publication: March 2014	Chemosphere	2014	98	NA	78	83	2023-03-14	Article	NA	NA	NA	NA	1879-1298 (electronic),0045-6535	NA	Elsevier Ltd	Introduction: Dyslipidemia in children is associated with accelerated atherosclerosis and earlier cardiovascular disease development. Environmental exposure to perfluorooctanoic acid (PFOA) and perfluorooctane sulfonate (PFOS) have been shown to be associated with dyslipidemia in adults. However, there are few general population studies examining this association in children or adolescents. In th…	NA	Dyslipidemia,Lipids,Perfluoroalkyl chemicals,Perfluorooctane sulfonate,Perfluorooctanoic acid,PFC	lipid (endogenous compound), perfluorooctanesulfonic acid (drug toxicity), perfluorooctanoic acid (drug toxicity)	cotinine (endogenous compound), high density lipoprotein cholesterol (endogenous compound), low density lipoprotein cholesterol (endogenous compound), triacylglycerol (endogenous compound)	lipid blood level	adolescent, article, blood level, cholesterol blood level, cross-sectional study, disease association, drug exposure, dyslipidemia, environmental exposure, female, human, major clinical study, male, physical activity, triacylglycerol blood level	NA	NA	NA	NA
n085	nPM085	34468161	Exposure to Perfluoroalkyl Substances and Glucose Homeostasis in Youth	Goodrich JA, Alderete TL, Baumert BO, Berhane K, Chen Z, Gilliland FD, Goran MI, Hu X, Jones DP, Margetaki K, Rock S, Stratakis N, Valvi D, Walker DI, Conti DV, Chatzi L.	Environ Health Perspect. 2021 Sep;129(9):97002. doi: 10.1289/EHP9200. Epub 2021 Sep 1.	Goodrich JA	Environ Health Perspect	2021	2021-09-01	PMC8409228	NA	10.1289/ehp9200	TRUE	nEm099	Exposure to perfluoroalkyl substances and glucose homeostasis in youth	NA	Goodrich J.A., Alderete T.L., Baumert B.O., Berhane K., Chen Z., Gilliland F.D., Goran M.I., Hu X., Jones D.P., Margetaki K., Rock S., Stratakis N., Valvi D., Walker D.I., Conti D.V., Chatzi L.	(Goodrich J.A., jagoodri@usc.edu; Baumert B.O.; Chen Z.; Gilliland F.D.; Margetaki K.; Rock S.; Stratakis N.; Conti D.V.; Chatzi L.) Department of Population and Public Health Sciences, University of Southern California, Los Angeles, CA, United States. , (Alderete T.L.) Department of Integrative Physiology, University of Colorado Boulder, Boulder, CO, United States. , (Berhane K.) Department of B…	J.A. Goodrich, Department of Population and Public Health Sciences, University of Southern California, Los Angeles, CA, United States. Email: jagoodri@usc.edu	NA	2021-09-14	2021-11-23	Environmental Health Perspectives (2021) 129:9 Article Number: 097002. Date of Publication: 1 Sep 2021	Environmental Health Perspectives	2021	129	9	NA	NA	2021-09-01	Article	NA	NA	NA	NA	1552-9924 (electronic),0091-6765	NA	Public Health Services, US Dept of Health and Human Services	BACKGROUND: Exposure to per-and polyfluoroalkyl substances (PFAS), a prevalent class of persistent pollutants, may increase the risk of type 2 diabetes. OBJECTIVE: We examined associations between PFAS exposure and glucose metabolism in youth. METHODS: Overweight/obese adolescents from the Study of Latino Adolescents at Risk of Type 2 Diabetes (SOLAR; n = 310) participated in annual visits for an…	NA	NA	NA	acetonitrile, citrate sodium, edetic acid, hemoglobin A1c (endogenous compound), heparin, perfluorohexanesulfonic acid, protein, sodium fluoride, stable isotope	glucose homeostasis	adolescent, adult, adulthood, age, anthropometry, area under the curve, article, body mass, cell function, child, cohort analysis, cross-sectional study, female, gender, glucose blood level, glucose metabolism, glucose tolerance test, Hollingshead Four Factor Index, homeostasis model assessment, human, insulin resistance, insulin sensitivity, limit of detection, liquid chromatography-mass spectro…	NA	NA	Orbitrap Tribrid (Thermo)	Thermo
n086	nPM086	36402036	Cumulative maternal and neonatal effects of combined exposure to a mixture of perfluorooctanoic acid (PFOA) and perfluorooctane sulfonic acid (PFOS) during pregnancy in the Sprague-Dawley rat	Conley JM, Lambright CS, Evans N, Medlock-Kakaley E, Dixon A, Hill D, McCord J, Strynar MJ, Ford J, Gray LE Jr.	Environ Int. 2022 Dec;170:107631. doi: 10.1016/j.envint.2022.107631. Epub 2022 Nov 12.	Conley JM	Environ Int	2022	2022-11-19	NA	NA	10.1016/j.envint.2022.107631	TRUE	nEm009	Cumulative maternal and neonatal effects of combined exposure to a mixture of perfluorooctanoic acid (PFOA) and perfluorooctane sulfonic acid (PFOS) during pregnancy in the Sprague-Dawley rat	NA	Conley J.M., Lambright C.S., Evans N., Medlock-Kakaley E., Dixon A., Hill D., McCord J., Strynar M.J., Ford J., Gray L.E.	(Conley J.M., conley.justin@epa.gov; Lambright C.S., lambright.christy@epa.gov; Evans N., evans.nicola@epa.gov; Medlock-Kakaley E., medlockkakaley.elizabeth@epa.gov; Dixon A., dixon.aaron@epa.gov; Hill D., hill.donna@epa.gov; Gray L.E., gray.earl@epa.gov) U.S. Environmental Protection Agency/Office of Research & Development/Center for Public Health and Environmental Assessment, Research Triangle …	NA	NA	2022-11-25	2022-12-19	Environment international (2022) 170 (107631). Date of Publication: 1 Dec 2022	Environment international	2022	170	NA	107631	NA	2022-12-01	Article	NA	NA	NA	NA	1873-6750 (electronic)	NA	NLM (Medline)	Globally, biomonitoring data demonstrate virtually all humans carry residues of multiple per- and polyfluoroalkyl substances (PFAS). Despite pervasive co-exposure, limited mixtures-based in vivo PFAS toxicity research has been conducted. Perfluorooctanoic acid (PFOA) and perfluorooctane sulfonic acid (PFOS) are commonly detected PFAS in human and environmental samples and both produce adverse eff…	NA	Developmental,Dose addition,Liver,Mixture,PFAS,Relative potency factor	NA	perfluorooctanesulfonic acid, perfluorooctanoic acid	family, health status	animal, female, human, pregnancy, rat, Sprague Dawley rat	NA	NA	NA	NA
n087	nPM087	36402982	Bone mass density following developmental exposures to perfluoroalkyl substances (PFAS): a longitudinal cohort study	Blomberg A, Mortensen J, Weihe P, Grandjean P.	Environ Health. 2022 Nov 19;21(1):113. doi: 10.1186/s12940-022-00929-w.	Blomberg A	Environ Health	2022	2022-11-19	PMC9675242	NA	10.1186/s12940-022-00929-w	TRUE	nEm006	Bone mass density following developmental exposures to perfluoroalkyl substances (PFAS): a longitudinal cohort study	NA	Blomberg A., Mortensen J., Weihe P., Grandjean P.	(Blomberg A., annelise.blomberg@med.lu.se) Department of Environmental Health, Harvard T.H. Chan School of Public Health, Boston, MA, United States. , (Blomberg A., annelise.blomberg@med.lu.se; Grandjean P.) Division of Occupational and Environmental Medicine, Lund University, ScheelevÃ¤gen 2, Lund, Sweden. , (Mortensen J.) Department of Clinical Physiology and Nuclear Medicine, Rigshospitalet, C…	A. Blomberg, Division of Occupational and Environmental Medicine, Lund University, ScheelevÃ¤gen 2, Lund, Sweden. Email: annelise.blomberg@med.lu.se	NA	2022-11-24	2023-02-01	Environmental Health: A Global Access Science Source (2022) 21:1 Article Number: 113. Date of Publication: 1 Dec 2022	Environmental Health: A Global Access Science Source	2022	21	1	NA	NA	2022-12-01	Article	NA	NA	NA	NA	1476-069X (electronic)	NA	BioMed Central Ltd	Background: Environmental exposures to industrial chemicals, including perfluoroalkyl substances (PFAS), may play a role in bone development and future risk of osteoporosis. However, as prospective evidence is limited, the role of developmental PFAS exposures in bone density changes in childhood is unclear. The objective of this study was to estimate associations between serum-PFAS concentrations…	NA	Bone mass density,Childhood,DXA,Per- and polyfluoroalkyl substances,PFAS	serpacwa (drug toxicity)	NA	bone density, bone mass, environmental exposure	adulthood, age distribution, analysis of covariance, article, birth cohort, blood sampling, body composition, bone development, child, childhood, cohort analysis, controlled study, cord serum, disease association, dual energy X ray absorptiometry, Faroe Islands, female, height, human, infant, longitudinal study, major clinical study, male, maternal exposure, mediation analysis, multivariate logis…	NA	NA	NA	NA
n088	nPM088	32620010	Pregnancy Per- and Polyfluoroalkyl Substance Concentrations and Postpartum Health in Project Viva: A Prospective Cohort	Mitro SD, Sagiv SK, Fleisch AF, Jaacks LM, Williams PL, Rifas-Shiman SL, Calafat AM, Hivert MF, Oken E, James-Todd TM.	J Clin Endocrinol Metab. 2020 Sep 1;105(9):e3415-26. doi: 10.1210/clinem/dgaa431.	Mitro SD	J Clin Endocrinol Metab	2020	2020-07-04	PMC7418448	NA	10.1210/clinem/dgaa431	TRUE	nEm193	Pregnancy per- And polyfluoroalkyl substance concentrations and postpartum health in project viva: a prospective cohort	NA	Mitro S.D., Sagiv S.K., Fleisch A.F., Jaacks L.M., Williams P.L., Rifas-Shiman S.L., Calafat A.M., Hivert M.-F., Oken E., James-Todd T.M.	(Mitro S.D., smitro@g.harvard.edu) Population Health Sciences Program, Harvard University, Boston, MA, United States. , (Sagiv S.K.) Department of Epidemiology, University of California, Berkeley School of Public Health, Berkeley, CA, United States. , (Fleisch A.F.) Pediatric Endocrinology andDiabetes, Maine Medical Center, Center for Outcomes Research and Evaluation, Maine MedicalCenter Research…	S.D. Mitro, Harvard T. H. Chan School of Public Health, Kresge Building, 9th floor, 677 Huntington Avenue, Boston, MA, United States. Email: smitro@g.harvard.edu	NA	2020-11-09	2020-11-10	Journal of Clinical Endocrinology and Metabolism (2020) 105:9 (E3415-E3426). Date of Publication: 1 Sep 2020	Journal of Clinical Endocrinology and Metabolism	2020	105	9	E3415	E3426	2020-09-01	Article	NA	NA	NA	NA	1945-7197 (electronic),0021-972X	NA	Endocrine Society, chris.payne@oup.com	Context: Per- and polyfluoroalkyl substances (PFAS) are environmental chemicals linked to weight gain and type 2 diabetes. Objective: We examined the extent to which PFAS plasma concentrations during pregnancy were associated with postpartum anthropometry and biomarkers. Design, Patients, and Measures: We studied women recruited between 1999 and 2002 in the Project Viva prospective cohort with pr…	NA	Anthropometry,Biomarkers,PFAS,Postpartum,Pregnancy	environmental chemical (drug toxicity), perfluoroalkyl substance (drug toxicity), polyfluoroalkyl substance (drug toxicity)	2 (n ethyl perfluorooctane sulfonamide) acetic acid (drug toxicity), adiponectin (endogenous compound), biological marker (endogenous compound), C reactive protein (endogenous compound), hemoglobin A1c (endogenous compound), interleukin 6 (endogenous compound), leptin (endogenous compound), perfluorooctanesulfonic acid (drug toxicity), perfluorooctanoic acid (drug toxicity), sex hormone binding g…	environmental exposure, maternal welfare, pregnancy, puerperium	adult, age, anthropometry, arm circumference, article, blood level, blood pressure measurement, body mass, breast feeding, cohort analysis, disease association, educational status, ethnicity, female, hemoglobin blood level, human, hypertension (diagnosis), income, marriage, maternal smoking, obesity, parity, priority journal, prospective study, protein blood level, skinfold thickness, subscapular…	NA	NA	NA	NA
n089	nPM089	29175300	Perfluorooctanoic acid and low birth weight: Estimates of US attributable burden and economic costs from 2003 through 2014	Malits J, Blustein J, Trasande L, Attina TM.	Int J Hyg Environ Health. 2018 Mar;221(2):269-275. doi: 10.1016/j.ijheh.2017.11.004. Epub 2017 Nov 22.	Malits J	Int J Hyg Environ Health	2018	2017-11-28	NA	NA	10.1016/j.ijheh.2017.11.004	TRUE	nEm356	Perfluorooctanoic acid and low birth weight: Estimates of US attributable burden and economic costs from 2003 through 2014	NA	Malits J., Blustein J., Trasande L., Attina T.M.	(Malits J., julia.malits@nyumc.org; Attina T.M., teresa.attina@nyumc.org) Department of Pediatrics, NYU School of Medicine, 403 E 34th St, New York, NY 10016, (Blustein J., jan.blustein@nyu.edu) Department of Health Policy, Medicine, and Population Health, NYU School of Medicine; NYU Wagner School of Public Service, New York, NY, (Trasande L., leonardo.trasande@nyumc.org) Department of Pediatrics…	NA	NA	NA	2019-01-14	International journal of hygiene and environmental health (2018) 221:2 (269-275). Date of Publication: 1 Mar 2018	International journal of hygiene and environmental health	2018	221	2	269	275	2018-03-01	Article	NA	NA	NA	NA	1618-131X (electronic)	NA	NA	BACKGROUND AND OBJECTIVE: In utero exposure to perfluorooctanoic acid (PFOA) has been associated with decreases in birth weight. We aimed to estimate the proportion of PFOA-attributable low birth weight (LBW) births and associated costs in the US from 2003 to 2014, a period during which there were industry-initiated and regulatory activities aimed at reducing exposure. METHODS: Serum PFOA levels …	NA	Economic costs,Low birth weight,NHANES,PFOA exposure	NA	fluorocarbon (drug toxicity), octanoic acid derivative (drug toxicity), perfluorooctanoic acid	economics, low birth weight	blood, cost, female, human, maternal exposure, pregnancy, theoretical model, United States	NA	NA	NA	NA
n090	nPM090	33467168	Associations of Maternal Stress, Prenatal Exposure to Per- and Polyfluoroalkyl Substances (PFAS), and Demographic Risk Factors with Birth Outcomes and Offspring Neurodevelopment: An Overview of the ECHO.CA.IL Prospective Birth Cohorts	Eick SM, Enright EA, Geiger SD, Dzwilewski KLC, DeMicco E, Smith S, Park JS, Aguiar A, Woodruff TJ, Morello-Frosch R, Schantz SL.	Int J Environ Res Public Health. 2021 Jan 16;18(2):742. doi: 10.3390/ijerph18020742.	Eick SM	Int J Environ Res Public Health	2021	2021-01-20	PMC7830765	NA	10.3390/ijerph18020742	TRUE	nEm158	Associations of maternal stress, prenatal exposure to per- and polyfluoroalkyl substances (PFAS), and demographic risk factors with birth outcomes and offspring neurodevelopment: An overview of the ECHO.CA.IL prospective birth cohorts	NA	Eick S.M., Enright E.A., Geiger S.D., Dzwilewski K.L.C., DeMicco E., Smith S., Park J.-S., Aguiar A., Woodruff T.J., Morello-Frosch R., Schantz S.L.	(Eick S.M., stephanie.eick@ucsf.edu; DeMicco E., erin.demicco@ucsf.edu; Woodruff T.J., tracey.woodruff@ucsf.edu; Morello-Frosch R., rmf@berkeley.edu) Department of Obstetrics, Gynecology and Reproductive Sciences, University of California, San Francisco, CA, United States. , (Enright E.A., enrighte@illinois.edu; Geiger S.D., smurphy7@illinois.edu; Dzwilewski K.L.C., kelsey.dzw@gmail.com; Aguiar A…	S.M. Eick, Department of Obstetrics, Gynecology and Reproductive Sciences, University of California, San Francisco, CA, United States. Email: stephanie.eick@ucsf.edu	NA	2021-02-24	2021-03-23	International Journal of Environmental Research and Public Health (2021) 18:2 (1-17) Article Number: 742. Date of Publication: 2 Jan 2021	International Journal of Environmental Research and Public Health	2021	18	2	1	17	2021-01-02	Article	NA	NA	NA	NA	1660-4601 (electronic),1661-7827	NA	MDPI AG	Background. Infants whose mothers experience greater psychosocial stress and environmental chemical exposures during pregnancy may face greater rates of preterm birth, lower birth weight, and impaired neurodevelopment. Methods. ECHO.CA.IL is composed of two cohorts, Chemicals in Our Bodies (CIOB; n = 822 pregnant women and n = 286 infants) and Illinois Kids Development Study (IKIDS; n = 565 mothe…	NA	Birth outcomes,Health disparities,Neurodevelopment,Per- and polyfluoroalkyl substances,Psychosocial stress	alkyl group (special situation for pharmacovigilance), perfluoroalkyl substance (special situation for pharmacovigilance), polyfluoroalkyl substance (special situation for pharmacovigilance)	biological marker (endogenous compound), perfluorohexanesulfonic acid (special situation for pharmacovigilance), perfluorononanoic acid (special situation for pharmacovigilance), perfluorooctanesulfonic acid (special situation for pharmacovigilance), perfluorooctanoic acid (special situation for pharmacovigilance), unclassified drug	maternal stress, nerve cell differentiation, pregnancy outcome, progeny, risk factor	adult, age, article, child, cognition, cohort analysis, controlled study, demography, depression, educational status, ethnic difference, female, geography, gestational age, human, infant, longitudinal study, low birth weight, male, premature labor, preschool child, race difference, second trimester pregnancy, single (marital status), social status	NA	NA	NA	NA
n091	nPM091	34187491	Associations between exposure to perfluoroalkyl substances and body fat evaluated by DXA and MRI in 109 adolescent boys	Thomsen ML, Henriksen LS, Tinggaard J, Nielsen F, Jensen TK, Main KM.	Environ Health. 2021 Jun 28;20(1):73. doi: 10.1186/s12940-021-00758-3.	Thomsen ML	Environ Health	2021	2021-06-30	PMC8244201	NA	10.1186/s12940-021-00758-3	TRUE	nEm073	Associations between exposure to perfluoroalkyl substances and body fat evaluated by DXA and MRI in 109 adolescent boys	NA	Thomsen M.L., Henriksen L.S., Tinggaard J., Nielsen F., Jensen T.K., Main K.M.	(Thomsen M.L., mathilde.lolk.thomsen@regionh.dk; Henriksen L.S., louise.scheutz.henriksen.01@regionh.dk; Tinggaard J., jeanette.tinggaard@regionh.dk; Jensen T.K., tkjensen@health.sdu.dk; Main K.M., katharina.main@regionh.dk) Department of Growth and Reproduction, Copenhagen University Hospital â€“ Rigshospitalet and Department of Clinical Medicine, University of Copenhagen, Copenhagen, Denmark. ,…	M.L. Thomsen, Department of Growth and Reproduction, Copenhagen University Hospital â€“ Rigshospitalet and Department of Clinical Medicine, University of Copenhagen, Copenhagen, Denmark. Email: mathilde.lolk.thomsen@regionh.dk	NA	2021-07-06	2021-07-08	Environmental Health: A Global Access Science Source (2021) 20:1 Article Number: 73. Date of Publication: 1 Dec 2021	Environmental Health: A Global Access Science Source	2021	20	1	NA	NA	2021-12-01	Article	NA	NA	NA	NA	1476-069X (electronic)	NA	BioMed Central Ltd	Background: Exposure to perfluoroalkyl substances (PFASs) has been associated with changes in body mass index and adiposity, but evidence is inconsistent as study design, population age, follow-up periods and exposure levels vary between studies. We investigated associations between PFAS exposure and body fat in a cross-sectional study of healthy boys. Methods: In 109 boys (10â€“14 years old), ma…	NA	Adolescence,Dual-energy X-ray absorptiometry,Fat percentage,Magnetic resonance imaging,Perfluoroalkyl substances	perfluorodecanoic acid, perfluorohexanesulfonic acid, perfluorononanoic acid, perfluorooctanesulfonic acid, perfluorooctanoic acid	NA	body fat, dual energy X ray absorptiometry, environmental exposure, nuclear magnetic resonance imaging	abdominal fat, adolescent, android fat, android gynoid ratio, article, blood level, body fat percentage, child, cohort analysis, cross-sectional study, female, gynoid fat, human, intra-abdominal fat, liquid chromatography-mass spectrometry, longitudinal study, male, MRI scanner, total body fat, triple quadrupole mass spectrometry	NA	NA	NA	Siemens (Germany), GE Healthcare (United States)
n092	nPM092	36182800	Association between prenatal exposure to perfluoroalkyl substances and anogenital distance in female neonates	Li J, Yang L, He G, Wang B, Miao M, Ji H, Wen S, Cao W, Yuan W, Liang H.	Ecotoxicol Environ Saf. 2022 Oct 15;245:114130. doi: 10.1016/j.ecoenv.2022.114130. Epub 2022 Sep 28.	Li J	Ecotoxicol Environ Saf	2022	2022-10-01	NA	NA	10.1016/j.ecoenv.2022.114130	TRUE	nEm017	Association between prenatal exposure to perfluoroalkyl substances and anogenital distance in female neonates	NA	Li J., Yang L., He G., Wang B., Miao M., Ji H., Wen S., Cao W., Yuan W., Liang H.	(Li J.; Miao M.; Ji H.; Yuan W.; Liang H., lianghong@sibpt.com) National Health Commission Key Lab of Reproduction Regulation (Shanghai Institute for Biomedical and Pharmaceutical Technologies), School of Public Health, Fudan University, Shanghai, China. , (Yang L.) The First People's Hospital of Jiashan, Zhejiang Province, Jiaxing, China. , (He G.) School of Public Health/Key Laboratory of Publi…	H. Liang, National Health Commission Key Laboratory of Reproduction Regulation (Shanghai Institute for Biomedical and Pharmaceutical Technologies), Fudan University, 779 Old Hu Min Road, Shanghai, China. Email: lianghong@sibpt.com	NA	2022-10-06	2022-10-14	Ecotoxicology and Environmental Safety (2022) 245 Article Number: 114130. Date of Publication: 15 Oct 2022	Ecotoxicology and Environmental Safety	2022	245	NA	NA	NA	2022-10-15	Article	NA	NA	NA	NA	1090-2414 (electronic),0147-6513	NA	Academic Press	Background: Perfluoroalkyl substances (PFASs) have been reported to exert reproductive toxicity. Anogenital distance (AGD) is a biomarker of intrauterine androgen exposure and an indicator of genital development. An animal study reported that female neonatal rats exposed to perfluorooctanoic acid or perfluorooctane sulfonate (PFOS) during postnatal days 1â€“5 exhibited a longer AGD, while epidemi…	NA	Anogenital distance,Genital development,Maternal exposure,Perfluoroalkyl substances,Prospective study	perfluorododecanoic acid (drug toxicity), perfluorohexanesulfonic acid (drug toxicity), perfluorooctanesulfonic acid (drug toxicity), perfluorooctanoic acid (drug toxicity)	NA	anogenital distance, disease association, prenatal exposure, reproductive toxicity	article, Bayesian network, blood examination, cohort analysis, female, female genital system, fourchette, gestational age, high performance liquid chromatography, human, mass spectrometry, maternal age, newborn, perinatal period	NA	NA	NA	NA
n093	nPM093	34091765	Influence of seasonal variation on post-farrowing dysgalactia syndrome (PFDS) and serum biochemistry profiles in the periparturient sow	Patra MK, De UK, Kent Y, Rungsung S, Krishnaswamy N, Deka BC.	Trop Anim Health Prod. 2021 Jun 6;53(3):346. doi: 10.1007/s11250-021-02793-1.	Patra MK	Trop Anim Health Prod	2021	2021-06-06	NA	NA	10.1007/s11250-021-02793-1	TRUE	nEm121	Influence of seasonal variation on post-farrowing dysgalactia syndrome (PFDS) and serum biochemistry profiles in the periparturient sow	NA	Patra M.K., De U.K., Kent Y., Rungsung S., Krishnaswamy N., Deka B.C.	(Patra M.K.) Livestock Production and Management Section, ICAR-Indian Veterinary Research Institute, UP, Bareilly, India. , (Patra M.K.) ICAR Research Complex for North Eastern Hill Region, Nagaland Centre, Nagaland, India. , (De U.K.) Division of Medicine, ICAR-Indian Veterinary Research Institute, UP, Bareilly, India. , (Kent Y.; Rungsung S.; Deka B.C.) ICAR Research Complex for North Eastern H…	NA	NA	2021-06-17	2021-07-14	Tropical animal health and production (2021) 53:3 (346). Date of Publication: 6 Jun 2021	Tropical animal health and production	2021	53	3	346	NA	2021-06-06	Article	NA	NA	NA	NA	1573-7438 (electronic)	NA	NLM (Medline)	The objective of this study was to investigate the effect of seasonal variation on the frequency of post-farrowing dysgalactia syndrome (PFDS), sow body condition score (BCS), piglet survival, and weaning to estrus interval under intensive management systems. In addition, the effects of PFDS on litter characteristics and serum biochemistry, oxidative stress indices, thyroid, and cortisol profile …	NA	Biomarker,Dysgalactia,Piglet,Season,Survival,Transition	NA	NA	season	animal, epidemiology, female, India, litter size, pig, pregnancy, retrospective study, weaning	NA	NA	NA	NA
n094	nPM094	34419464	Early-life exposure to perfluoroalkyl substances in relation to serum adipokines in a longitudinal birth cohort	Shih YH, Blomberg AJ, JÃ¸rgensen LH, Weihe P, Grandjean P.	Environ Res. 2022 Mar;204(Pt A):111905. doi: 10.1016/j.envres.2021.111905. Epub 2021 Aug 19.	Shih YH	Environ Res	2022	2021-08-22	NA	NA	10.1016/j.envres.2021.111905	TRUE	nEm050	Early-life exposure to perfluoroalkyl substances in relation to serum adipokines in a longitudinal birth cohort	NA	Shih Y.-H., Blomberg A.J., JÃ¸rgensen L.H., Weihe P., Grandjean P.	(Shih Y.-H.; Blomberg A.J.; Grandjean P., pgrand@hsph.harvard.edu) Department of Environmental Health, Harvard T.H. Chan School of Public Health, Boston, MA, United States. , (Blomberg A.J.) Division of Occupational and Environmental Medicine, Lund University, Lund, Sweden. , (JÃ¸rgensen L.H.) Department of Clinical Biochemistry and Pharmacology, Odense University Hospital and Institute of Clinic…	P. Grandjean, Harvard T.H. Chan School of Public Health, Building 1 Room 1312B, 66 Huntington Ave, Boston, MA, United States. Email: pgrand@hsph.harvard.edu	NA	2021-09-09	2021-10-27	Environmental Research (2022) 204 Article Number: 111905. Date of Publication: 1 Mar 2022	Environmental Research	2022	204	NA	NA	NA	2022-03-01	Article	NA	NA	NA	NA	1096-0953 (electronic),0013-9351	NA	Academic Press Inc.	Background: Per- and polyfluoroalkyl substances (PFAS) exposure has been linked to metabolic health outcomes such as obesity, and changes in adipokine hormones may be one of the underlying biological mechanisms. We prospectively evaluated the associations between prenatal and early childhood exposures to PFASs and adipokines in children. Material and methods: PFAS concentrations were measured in …	NA	Adipokine,Childhood,Metabolic health,Perfluoroalkyl substances,Prospective study	adipocytokine (endogenous compound), perfluorinated alkyl substance, perfluoro compound	adiponectin (endogenous compound), leptin (endogenous compound), leptin receptor (endogenous compound), resistin (endogenous compound), unclassified drug	childhood, prenatal exposure	article, Bayesian learning, birth, child, cohort analysis, controlled study, correlation analysis, female, hormone blood level, human, human tissue, infant, kernel method, linear regression analysis, longitudinal study, major clinical study, male, prospective study, sensitivity analysis	NA	NA	NA	NA
n095	nPM095	33866704	Prenatal exposure to persistent organic pollutants as a risk factor of offspring metabolic syndrome development during childhood	GonzÃ¡lez MC.	Rev Environ Health. 2021 Apr 15;37(1):61-70. doi: 10.1515/reveh-2020-0113. Print 2022 Mar 28.	GonzÃ¡lez MC	Rev Environ Health	2021	2021-04-18	NA	NA	10.1515/reveh-2020-0113	TRUE	nEm048	Prenatal exposure to persistent organic pollutants as a risk factor of offspring metabolic syndrome development during childhood	NA	GonzÃ¡lez M.C.	(GonzÃ¡lez M.C.) School of Public Health, University at Albany, Rensselaer, NY, USA	NA	NA	2021-05-20	2022-03-15	Reviews on environmental health (2022) 37:1 (61-70). Date of Publication: 28 Mar 2022	Reviews on environmental health	2022	37	1	61	70	2022-03-28	Review	NA	NA	NA	NA	2191-0308 (electronic)	NA	NLM (Medline)	Persistent Organic Pollutants (POPs) are exogenous, artificially made chemicals that can disrupt the biological system of individuals and animals. POPs encompass a variety of chemicals including, dioxins, organochlorines (OCs), polychlorinated biphenyl (PCBs), and perfluoroalkyl substances (PFASs) that contain a long half-life and highly resistant to biodegradation. These environmental pollutants…	NA	fetus,obesity,organochlorines,pediatric,pregnancy	polychlorinated biphenyl (drug toxicity)	NA	metabolic syndrome X (epidemiology), pollutant, prenatal exposure	animal, female, human, pregnancy, risk factor, toxicity	NA	NA	NA	NA
n096	nPM096	26333069	Sociodemographic and Perinatal Predictors of Early Pregnancy Per- and Polyfluoroalkyl Substance (PFAS) Concentrations	Sagiv SK, Rifas-Shiman SL, Webster TF, Mora AM, Harris MH, Calafat AM, Ye X, Gillman MW, Oken E.	Environ Sci Technol. 2015 Oct 6;49(19):11849-58. doi: 10.1021/acs.est.5b02489. Epub 2015 Sep 11.	Sagiv SK	Environ Sci Technol	2015	2015-09-03	PMC4638415	NIHMS729839	10.1021/acs.est.5b02489	TRUE	nEm470	Sociodemographic and Perinatal Predictors of Early Pregnancy Per- and Polyfluoroalkyl Substance (PFAS) Concentrations	NA	Sagiv S.K., Rifas-Shiman S.L., Webster T.F., Mora A.M., Harris M.H., Calafat A.M., Ye X., Gillman M.W., Oken E.	(Sagiv S.K., sagiv@berkeley.edu) Division of Epidemiology, University of California, Berkeley, CA, United States. , (Sagiv S.K., sagiv@berkeley.edu; Webster T.F.; Mora A.M.; Harris M.H.) Department of Environmental Health, Boston University, School of Public Health, Boston, MA, United States. , (Rifas-Shiman S.L.; Gillman M.W.; Oken E.) Obesity Prevention Program, Department of Population Medicin…	S.K. Sagiv, Division of Epidemiology, University of California, Berkeley, CA, United States. Email: sagiv@berkeley.edu	NA	2015-10-15	2015-10-28	Environmental Science and Technology (2015) 49:19 (11849-11858). Date of Publication: 2 Sep 2015	Environmental Science and Technology	2015	49	19	11849	11858	2015-09-02	Article	NA	NA	NA	NA	1520-5851 (electronic),0013-936X	NA	American Chemical Society, service@acs.org	Per- and polyfluoroalkyl substances (PFASs), used in food packaging and stain-resistant coatings, are suspected developmental toxicants that are ubiquitous and persistent in the environment. We measured plasma PFAS concentrations during early pregnancy (median = 9.7 weeks gestation) among 1645 women in the Boston-area Project Viva cohort, recruited during 1999-2002. We used multivariable linear r…	NA	NA	perfluorohexanesulfonic acid (endogenous compound), perfluorononanoic acid (endogenous compound), perfluorooctanesulfonic acid (endogenous compound), perfluorooctanoic acid (endogenous compound)	albumin (endogenous compound)	demography, first trimester pregnancy, perinatal period	adult, albumin blood level, article, blood sampling, body mass, breast feeding, cohort analysis, concentration (parameter), female, geometry, gestational age, glomerulus filtration rate, groups by age, human, linear regression analysis, normal human, nullipara, predictor variable, pregnant woman	NA	NA	NA	NA
n097	nPM097	18419647	Estimating consumer exposure to PFOS and PFOA	Trudel D, Horowitz L, Wormuth M, Scheringer M, Cousins IT, HungerbÃ¼hler K.	Risk Anal. 2008 Apr;28(2):251-69. doi: 10.1111/j.1539-6924.2008.01017.x.	Trudel D	Risk Anal	2008	2008-04-19	NA	NA	10.1111/j.1539-6924.2008.01017.x	TRUE	nEm700	Estimating consumer exposure to PFOS and PFOA	NA	Trudel D., Horowitz L., Wormuth M., Scheringer M., Cousins I.T., HungerbÃ¼hler K.	(Trudel D.; Horowitz L.; Wormuth M.; Scheringer M., scheringer@chem.ethz.ch; HungerbÃ¼hler K.) Institute for Chemical and Bioengineering, ETH Zurich, Wolfgang-Pauli-Str. 10, CH-8093 Zurich, Switzerland. , (Cousins I.T.) Department of Applied Environmental Science (ITM), Stockholm University, FrescativÃ¤gen 50, SE-10691 Stockholm, Sweden.	M. Scheringer, Institute for Chemical and Bioengineering, ETH Zurich, Wolfgang-Pauli-Str. 10, CH-8093 Zurich, Switzerland. Email: scheringer@chem.ethz.ch	NA	NA	2008-05-20	Risk Analysis (2008) 28:2 (251-269). Date of Publication: April 2008	Risk Analysis	2008	28	2	251	269	2023-04-08	Article	NA	NA	NA	NA	0272-4332,1539-6924 (electronic)	NA	Blackwell Publishing Inc., 350 Main Street, Malden, United States.	Perfluorinated compounds have been used for more than 50 years as process aids, surfactants, and for surface protection. This study is a comprehensive assessment of consumer exposure to perfluorooctane sulfonate (PFOS) and perfluorooctanoic acid (PFOA) from a variety of environmental and product-related sources. To identify relevant pathways leading to consumer exposure to PFOS and PFOA a scenari…	NA	Consumer exposure,Consumer products,Exposure analysis,Perfluorinated chemicals,PFOA,PFOS	perfluorooctanesulfonic acid (drug toxicity), perfluorooctanoic acid (drug toxicity)	drinking water	environmental exposure, food contamination, water contamination	ambient air, article, body weight, consumer advocacy, controlled study, female, food intake, health survey, house dust, human, male, nonhuman, risk assessment, toxicokinetics	NA	NA	NA	NA
n098	nPM098	35985401	Reproductive and developmental toxicity of perfluorooctane sulfonate (PFOS) in the white-footed mouse (Peromyscus leucopus)	Narizzano AM, Lent EM, Hanson JM, East AG, Bohannon ME, Quinn MJ Jr.	Reprod Toxicol. 2022 Oct;113:120-127. doi: 10.1016/j.reprotox.2022.08.011. Epub 2022 Aug 17.	Narizzano AM	Reprod Toxicol	2022	2022-08-19	NA	NA	10.1016/j.reprotox.2022.08.011	TRUE	nEm024	Reproductive and developmental toxicity of perfluorooctane sulfonate (PFOS) in the white-footed mouse (Peromyscus leucopus)	NA	Narizzano A.M., Lent E.M., Hanson J.M., East A.G., Bohannon M.E., Quinn M.J.	(Narizzano A.M., allison.m.narizzano.civ@health.mil; Lent E.M.; Hanson J.M.; East A.G.; Bohannon M.E.; Quinn M.J.) Toxicology Directorate, US Army Public Health Center, 5158 Blackhawk Road, Aberdeen Proving Ground, MD, United States.	A.M. Narizzano, Toxicology Directorate, US Army Public Health Center, 5158 Blackhawk Road, Aberdeen Proving Ground, MD, United States. Email: allison.m.narizzano.civ@health.mil	NA	2022-08-31	2022-10-28	Reproductive Toxicology (2022) 113 (120-127). Date of Publication: 1 Oct 2022	Reproductive Toxicology	2022	113	NA	120	127	2022-10-01	Article	NA	NA	NA	NA	1873-1708 (electronic),0890-6238	NA	Elsevier Inc.	Concerns about per- and polyfluoroalkyl substances (PFAS) stem from their ubiquitous presence in the environment, bioaccumulation, resistance to degradation, and toxicity. Previously, toxicity data relevant to ecological risk assessment has largely been aquatic, terrestrial invertebrates, or avian in origin. In this study, repeated oral exposures of perfluorooctane sulfonate (PFOS) were administe…	NA	Benchmark dose,Neonatal mortality,Peromyscus,PFAS,PFOS	perfluorooctanesulfonic acid (drug toxicity)	thyroxine (endogenous compound)	developmental toxicity, Peromyscus leucopus, reproductive toxicity	adult, animal cell, animal experiment, animal model, animal tissue, article, benchmark dose, body weight, cell vacuole, clinical observation, controlled study, dietary exposure, dose response, female, fetus, hormone determination, litter size, liver cell, liver weight, male, mouse, newborn mortality, nonhuman, prenatal exposure, risk factor, semen analysis, sex difference, toxic dose	NA	NA	NA	NA
n099	nPM099	35787426	Exposure to perfluoroalkyl substances and neonatal immunoglobulin profiles in the upstate KIDS study (2008-2010)	Jones LE, Ghassabian A, Lawrence DA, Sundaram R, Yeung E, Kannan K, Bell EM.	Environ Pollut. 2022 Sep 1;308:119656. doi: 10.1016/j.envpol.2022.119656. Epub 2022 Jul 1.	Jones LE	Environ Pollut	2022	2022-07-05	NA	NA	10.1016/j.envpol.2022.119656	TRUE	nEm028	Exposure to perfluoroalkyl substances and neonatal immunoglobulin profiles in the upstate KIDS study (2008â€“2010)	NA	Jones L.E., Ghassabian A., Lawrence D.A., Sundaram R., Yeung E., Kannan K., Bell E.M.	(Jones L.E., lejones@albany.edu; Lawrence D.A., david.lawrence@health.ny.gov; Bell E.M., ebell@albany.edu) Department of Environmental Health Sciences, School of Public Health, State University of New York, Albany, United States. , (Ghassabian A., Akhgar.Ghassabian@nyulangone.org; Kannan K., Kurunthachalam.Kannan@nyulangone.org) Department of Pediatrics, New York University Grossman School of Med…	E.M. Bell, Departments of Environmental Health Sciences, University at Albany, School of Public Health, One University Place Rm. 105, Rensselaer, NY, United States. Email: ebell@albany.edu	NA	2022-07-28	NA	Environmental Pollution (2022) 308 Article Number: 119656. Date of Publication: 1 Sep 2022	Environmental Pollution	2022	308	NA	NA	NA	2022-09-01	Article	NA	NA	NA	NA	1873-6424 (electronic),0269-7491	NA	Elsevier Ltd	Infant exposure to per/polyfluoroalkyl compounds is associated with immune disruption. We examined associations between neonatal concentrations of perflurooctanoic acid (PFOA) and perfluorooctanesulfonic acid (PFOS) and immunoglobulin (Ig) isotype profiles in a prospective cohort of infants. We measured Ig isotypes, including IgA, IgE, IgM and the IgG subclasses IgG(1), IgG(2), IgG(3), and IgG(4,…	NA	Mixture analysis,Neonatal immunity,PFOA,PFOS,Quantile-based g-computation	immunoglobulin, perfluorooctanesulfonic acid	endogenous compound, immunoglobulin A, immunoglobulin class, immunoglobulin E, immunoglobulin G, immunoglobulin G1, immunoglobulin G2, immunoglobulin G3, immunoglobulin G4, immunoglobulin M	immunity	article, body mass, child, cohort analysis, controlled study, drug therapy, female, gene expression, human, immunoglobulin blood level, infant, infertility therapy, major clinical study, male, newborn, parity, pollutant, pregnancy, prospective study, protein expression, race, randomized controlled trial, regression model	NA	NA	NA	NA
n100	nPM100	34566884	Early-Life Exposure to Per- and Poly-Fluorinated Alkyl Substances and Growth, Adiposity, and Puberty in Children: A Systematic Review	Lee YJ, Jung HW, Kim HY, Choi YJ, Lee YA.	Front Endocrinol (Lausanne). 2021 Sep 9;12:683297. doi: 10.3389/fendo.2021.683297. eCollection 2021.	Lee YJ	Front Endocrinol (Lausanne)	2021	2021-09-27	PMC8458955	NA	10.3389/fendo.2021.683297	TRUE	nEm094	Early-Life Exposure to Per- and Poly-Fluorinated Alkyl Substances and Growth, Adiposity, and Puberty in Children: A Systematic Review	NA	Lee Y.J., Jung H.W., Kim H.Y., Choi Y.-J., Lee Y.A.	(Lee Y.J.; Kim H.Y.; Lee Y.A.) Department of Pediatrics, Seoul National University Childrenâ€™s Hospital, Seoul National University College of Medicine, Seoul, South Korea. , (Jung H.W.) Department of Pediatrics, Kyung Hee University Medical Center, Seoul, South Korea. , (Choi Y.-J.) Department of Preventive Medicine, Seoul National University College of Medicine, Seoul, South Korea. , (Choi Y.-J…	Y.A. Lee, Department of Pediatrics, Seoul National University Childrenâ€™s Hospital, Seoul National University College of Medicine, Seoul, South Korea.	NA	2021-09-28	2021-10-19	Frontiers in Endocrinology (2021) 12 Article Number: 683297. Date of Publication: 9 Sep 2021	Frontiers in Endocrinology	2021	12	NA	NA	NA	2021-09-09	Review	NA	NA	NA	NA	1664-2392 (electronic)	NA	Frontiers Media S.A.	Per- or polyfluoroalkyl substances (PFAS), a family of synthetic polyfluorinated compounds, are widely used in consumer products. Ubiquitous exposures to PFAS, in consideration of their persistence, bioaccumulation potential, and toxicities have led to concerns regarding possible harmful effects during critical periods of development in early-life and long-term consequences on health. The potenti…	NA	adiposity,adolescent,birth weight,child,growth,perfluorinated alkylated substances,puberty	alkyl group (drug toxicity), perfluorooctanoic acid, polyfluoroalkyl substance (drug toxicity)	estradiol, follitropin, luteinizing hormone, perfluorodecanoic acid, perfluorohexanesulfonic acid, perfluorononanoic acid, perfluorooctanesulfonic acid, perfluoroundecanoic acid, peroxisome proliferator activated receptor, steroid hormone, testosterone, thyroid hormone, unclassified drug	childhood obesity, environmental exposure, fetus growth, fluorination, long term exposure, precocious puberty	bioaccumulation, birth length, birth weight, body fat, body height, body mass, body weight, dual energy X ray absorptiometry, gestational age, hormone metabolism, hormone synthesis, human, menarche, meta analysis, physical parameters, ponderal index, postnatal growth, prenatal exposure, review, risk assessment, skinfold thickness, systematic review, waist circumference, waist to height ratio	NA	NA	NA	NA
n101	nPM101	33258594	Effects of In Utero Exposure to Perfluorooctane Sulfonate on Placental Functions	Wan HT, Wong AY, Feng S, Wong CK.	Environ Sci Technol. 2020 Dec 15;54(24):16050-16061. doi: 10.1021/acs.est.0c06569. Epub 2020 Dec 1.	Wan HT	Environ Sci Technol	2020	2020-12-01	NA	NA	10.1021/acs.est.0c06569	TRUE	nEm175	Effects of in Utero Exposure to Perfluorooctane Sulfonate on Placental Functions	NA	Wan H.T., Wong A.Y.-M., Feng S., Wong C.K.-C.	(Wan H.T.; Wong A.Y.-M.; Feng S.; Wong C.K.-C., ckcwong@hkbu.edu.hk) Croucher Institute for Environmental Sciences, Department of Biology, Hong Kong Baptist University, Kowloon Hong Kong SAR, China.	C.K.-C. Wong, Croucher Institute for Environmental Sciences, Department of Biology, Hong Kong Baptist University, Kowloon Hong Kong SAR, China. Email: ckcwong@hkbu.edu.hk	NA	2020-12-23	2021-02-10	Environmental Science and Technology (2020) 54:24 (16050-16061). Date of Publication: 15 Dec 2020	Environmental Science and Technology	2020	54	24	16050	16061	2020-12-15	Article	NA	NA	NA	NA	1520-5851 (electronic),0013-936X	NA	American Chemical Society	Perfluorooctane sulfonate (PFOS) is a metabolic-disrupting chemical. There is a strong association between maternal and cord blood PFOS concentrations, affecting metabolism in early life. However, the underlying effects have not been fully elucidated. In this study, using the maternal-fetal model, we investigated the impact of gestational PFOS exposure on the placental structure and nutrient tran…	NA	NA	perfluorooctanesulfonic acid	amino acid, glucose	placenta function	adult, animal experiment, article, body weight, controlled study, embryonic and placental structures, female, fetomaternal transfusion, fetus, gestational age, mouse, nonhuman, nutrient, placenta weight, placental transfer, prenatal exposure, protein expression, Western blotting	NA	NA	NA	NA
n102	nPM102	20686339	Effects of perfluorooctanoic acid (PFOA) exposure to pregnant mice on reproduction	Yahia D, El-Nasser MA, Abedel-Latif M, Tsukuba C, Yoshida M, Sato I, Tsuda S.	J Toxicol Sci. 2010 Aug;35(4):527-33. doi: 10.2131/jts.35.527.	Yahia D	J Toxicol Sci	2010	2010-08-06	NA	NA	10.2131/jts.35.527	TRUE	nEm658	Effects of perfluorooctanoic acid (PFOA) exposure to pregnant mice on reproduction	NA	Yahia D., El-Nasser M.A., Abedel-Latif M., Tsukuba C., Yoshida M., Sato I., Tsuda S.	(Yahia D.; El-Nasser M.A.; Abedel-Latif M.) Department of Forensic Medicine and Toxicology, Faculty of Veterinary Medicine, Assiut University, Assiut 71526, Egypt. , (Yahia D.; Tsukuba C.; Sato I.; Tsuda S., s.tsuda@iwate-u.ac.jp) Department of Veterinary Medicine, Faculty of Agriculture, Iwate University, 3-18-8 Ueda, Morioka 020-8550, Japan. , (Yoshida M.) Biological Safety Research Center, Nat…	S. Tsuda, Department of Veterinary Medicine, Faculty of Agriculture, Iwate University, 3-18-8 Ueda, Morioka 020-8550, Japan. Email: s.tsuda@iwate-u.ac.jp	NA	2010-09-29	2022-07-15	Journal of Toxicological Sciences (2010) 35:4 (527-533). Date of Publication: August 2010	Journal of Toxicological Sciences	2010	35	4	527	533	2023-08-10	Article	NA	NA	NA	NA	1880-3989 (electronic),0388-1350	NA	Japanese Society of Toxicology	Perfluorooctanoic acid (PFOA) has similar characteristics to perfluorooctane sulfonate (PFOS) in reproduction toxicity featured by neonatal death. We found that PFOS exposure to mice during pregnancy led to intracranial blood vessel dilatation of fetuses accompanied by severe lung collapse which caused neonatal mortality. Thus, we adopted the corresponding experimental design to PFOS in order to …	NA	Biochemical,Mice,Neonatal death,PFOA	perfluorooctanoic acid (drug toxicity)	alanine aminotransferase (endogenous compound), alkaline phosphatase (endogenous compound), aspartate aminotransferase (endogenous compound), gamma glutamyltransferase (endogenous compound)	pregnancy, reproduction	animal experiment, animal tissue, article, calcification, controlled study, enzyme activity, female, fetus weight, finger phalanx, hypolipemia, hypoproteinemia, incisor, liver cell, liver hypertrophy, liver necrosis, liver weight, mitosis, mouse, newborn death, nonhuman, ossification, perinatal period, prenatal period, sternum, survival rate, teratology, toe phalanx, vasodilatation	NA	NA	NA	NA
n103	nPM103	34611219	Umbilical cord serum concentrations of perfluorooctane sulfonate, perfluorooctanoic acid, and the body mass index changes from birth to 5 1/2Â years of age	Horikoshi T, Nishimura T, Nomura Y, Iwabuchi T, Itoh H, Takizawa T, Tsuchiya KJ.	Sci Rep. 2021 Oct 5;11(1):19789. doi: 10.1038/s41598-021-99174-3.	Horikoshi T	Sci Rep	2021	2021-10-06	PMC8492859	NA	10.1038/s41598-021-99174-3	TRUE	nEm086	Umbilical cord serum concentrations of perfluorooctane sulfonate, perfluorooctanoic acid, and the body mass index changes from birth to 5 1/2Â years of age	NA	Horikoshi T., Nishimura T., Nomura Y., Iwabuchi T., Itoh H., Takizawa T., Tsuchiya K.J.	(Horikoshi T.) Department of Pediatrics, Gunma University Graduate School of Medicine, Maebashi, Japan. , (Horikoshi T.) Research Center for Child Mental Development, Hamamatsu University School of Medicine, Hamamatsu, Japan. , (Horikoshi T.) United Graduate School of Child Development, Hamamatsu University School of Medicine, Hamamatsu, Japan. , (Nishimura T.; Nomura Y.; Iwabuchi T.; Tsuchiya K.…	NA	NA	2021-11-01	2022-01-24	Scientific reports (2021) 11:1 (19789). Date of Publication: 5 Oct 2021	Scientific reports	2021	11	1	19789	NA	2021-10-05	Article	NA	NA	NA	NA	2045-2322 (electronic)	NA	NLM (Medline)	Prenatal exposure to perfluoroalkyl substances (PFAS) has been reported to affect body weight from birth to childhood, but the results remain inconclusive. We investigated whether umbilical cord blood concentrations of perfluorooctane sulfonate (PFOS) and perfluorooctanoic acid (PFOA) are associated with children's risk trajectory for obesity. 600 children were randomly selected from the Hamamats…	NA	NA	NA	alkanesulfonic acid, fluorocarbon, octanoic acid, perfluorooctanesulfonic acid, perfluorooctanoic acid	adverse event, blood, body mass, fetus blood, prenatal exposure	birth weight, child development, female, human, infant, male, maternal exposure, newborn, pregnancy, preschool child	NA	NA	NA	NA
n104	nPM104	32991923	Intrauterine exposure to per- and polyfluoroalkyl substances may harm children's lung function development	Kung YP, Lin CC, Chen MH, Tsai MS, Hsieh WS, Chen PC.	Environ Res. 2021 Jan;192:110178. doi: 10.1016/j.envres.2020.110178. Epub 2020 Sep 28.	Kung YP	Environ Res	2021	2020-09-29	NA	NA	10.1016/j.envres.2020.110178	TRUE	nEm164	Intrauterine exposure to per- and polyfluoroalkyl substances may harm children's lung function development	NA	Kung Y.-P., Lin C.-C., Chen M.-H., Tsai M.-S., Hsieh W.-S., Chen P.-C.	(Kung Y.-P.; Lin C.-C.; Tsai M.-S.; Chen P.-C., pchen@ntu.edu.tw) Institute of Environmental and Occupational Health Sciences, National Taiwan University College of Public Health, Taipei, Taiwan. , (Chen M.-H.) Institute of Population Health Sciences, National Health Research Institutes, Miaoli, Taiwan. , (Chen M.-H.; Hsieh W.-S., hsiehws@ntu.edu.tw) Department of Pediatrics, National Taiwan Univ…	P.-C. Chen, 17 Xuzhou Road, Taipei, Taiwan. Email: pchen@ntu.edu.tw""W.-S. Hsieh, Department of Pediatrics, Cathay General Hospital, 280 Renai Road Section 4, Taipei, Taiwan. Email: hsiehws@ntu.edu.tw	NA	2020-10-15	2020-10-22	Environmental Research (2021) 192 Article Number: 110178. Date of Publication: 1 Jan 2021	Environmental Research	2021	192	NA	NA	NA	2021-01-01	Article	NA	NA	NA	NA	1096-0953 (electronic),0013-9351	NA	Academic Press Inc., apjcs@harcourtbrace.com	Background: Per- and polyfluoroalkyl substances (PFAS), such as perfluorooctanoic acid (PFOA), perfluorooctane sulfonate (PFOS), perfluorononanoic acid (PFNA) and perfluoroundecanoic acid (PFUA), are common persistent environmental organic pollutants. Animal studies have indicated that PFAS influence inflammatory responses and lung development. However, whether prenatal or childhood PFAS exposure…	NA	Allergic disease,Lung development,Lung function,per- and polyfluoroalkyl substances,Prenatal exposure	perfluorononanoic acid (drug toxicity), perfluorooctanesulfonic acid (drug toxicity), perfluorooctanoic acid (drug toxicity), perfluoroundecanoic acid (drug toxicity)	NA	child development, lung development, lung function, lung injury (etiology), lung toxicity (etiology), prenatal exposure	abnormal value, age, allergic rhinitis, article, child, cohort analysis, comparative study, confounding variable, correlation coefficient, female, forced expiratory volume, forced vital capacity, human, liquid chromatography-mass spectrometry, low birth weight, major clinical study, male, peak expiratory flow, plasma, priority journal, prospective study, questionnaire, school child, serum, toxic …	NA	NA	NA	NA
n105	nPM105	33358873	Associations between perfluoroalkyl substances and thyroid hormones after high exposure through drinking water	Li Y, Xu Y, Fletcher T, Scott K, Nielsen C, Pineda D, Lindh CH, Olsson DS, Andersson EM, Jakobsson K.	Environ Res. 2021 Mar;194:110647. doi: 10.1016/j.envres.2020.110647. Epub 2020 Dec 29.	Li Y	Environ Res	2021	2020-12-28	NA	NA	10.1016/j.envres.2020.110647	TRUE	nEm148	Associations between perfluoroalkyl substances and thyroid hormones after high exposure through drinking water	NA	Li Y., Xu Y., Fletcher T., Scott K., Nielsen C., Pineda D., Lindh C.H., Olsson D.S., Andersson E.M., Jakobsson K.	(Li Y., Ying.li@gu.se; Xu Y.; Andersson E.M.; Jakobsson K.) School of Public Health and Community Medicine, Institute of Medicine, University of Gothenburg, Gothenburg, Sweden. , (Fletcher T.) London School of Hygiene and Tropical Medicine, London, United Kingdom. , (Scott K.; Nielsen C.; Pineda D.; Lindh C.H.) Division of Occupational and Environmental Medicine, Department of Laboratory Medicine…	Y. Li, School of Public Health and Community Medicine, Institute of Medicine, University of Gothenburg, Gothenburg, Sweden. Email: Ying.li@gu.se	NA	2021-01-08	2021-01-26	Environmental Research (2021) 194 Article Number: 110647. Date of Publication: 1 Mar 2021	Environmental Research	2021	194	NA	NA	NA	2021-03-01	Article	NA	NA	NA	NA	1096-0953 (electronic),0013-9351	NA	Academic Press Inc.	Background: The reported associations for several per- and polyfluoroalkyl substance (PFAS) with thyroid hormones are inconsistent in epidemiological studies. The purpose of the current study was to investigate the possible association of thyroid hormones in relation to serum levels of perfluorohexane sulfonate, perfluorooctane sulfonate and perfluorooctanoic acid, in a Swedish general population…	NA	PFHxS,PFOS,T3,T4,TSH	alkyl group, drinking water, thyroid hormone (endogenous compound)	perflexane, perfluorooctanesulfonic acid, perfluorooctanoic acid	population exposure, thyroid hormone blood level	adolescent, adult, aged, article, chemical analysis, child, controlled study, female, human, male, normal human, priority journal, Swedish citizen, water contamination	NA	NA	NA	NA
n106	nPM106	28865262	Perfluoroalkyl substances (PFASs) in breast milk from Korea: Time-course trends, influencing factors, and infant exposure	Lee S, Kim S, Park J, Kim HJ, Choi G, Choi S, Kim S, Kim SY, Kim S, Choi K, Moon HB.	Sci Total Environ. 2018 Jan 15;612:286-292. doi: 10.1016/j.scitotenv.2017.08.094. Epub 2017 Sep 1.	Lee S	Sci Total Environ	2018	2017-09-03	NA	NA	10.1016/j.scitotenv.2017.08.094	TRUE	nEm362	Perfluoroalkyl substances (PFASs) in breast milk from Korea: Time-course trends, influencing factors, and infant exposure	NA	Lee S., Kim S., Park J., Kim H.-J., Choi G., Choi S., Kim S., Kim S.Y., Kim S., Choi K., Moon H.-B.	(Lee S.; Moon H.-B., hbmoon@hanyang.ac.kr) Department of Marine Science and Convergence Engineering, Hanyang University, Ansan, South Korea. , (Kim S.; Kim S.; Choi K.) School of Public Health, Seoul National University, Seoul, South Korea. , (Park J.) College of Natural Sciences, Soonchunhyang University, Asan, South Korea. , (Kim H.-J.) College of Medicine, Korea University, Ansan, South Korea.…	H.-B. Moon, Department of Marine Science and Convergence Engineering, Hanyang University, Ansan, South Korea. Email: hbmoon@hanyang.ac.kr	NA	2017-09-05	2018-08-24	Science of the Total Environment (2018) 612 (286-292). Date of Publication: 15 Jan 2018	Science of the Total Environment	2018	612	NA	286	292	2018-01-15	Article	NA	NA	NA	NA	1879-1026 (electronic),0048-9697	NA	Elsevier B.V.	Breastfeeding is an important exposure pathway to perfluoroalkyl substances (PFASs) for newborn infants. Nevertheless, reports are limited on the occurrence and time-course of PFASs in breast milk, and most studies have focused on the analysis of perfluorooctane sulfonate (PFOS) and perfluorooctanoic acid (PFOA). In this study, 16 PFASs were analyzed in breast milk samples (n = 293) collected fro…	NA	Lactation,PFNA,PFOA,PFOS,Tolerable daily intake	perfluorononanoic acid (endogenous compound), perfluorooctanesulfonic acid (endogenous compound), perfluorooctanoic acid (endogenous compound)	NA	breast milk, food contamination, maternal exposure	adult, article, Asian, body mass, correlational study, dietary intake, European, fast food, feeding behavior, female, health hazard, human, infant feeding, Korea, lactation, lactose tolerance, maternal age, maternal behavior, milk, mood change, parity, population research, priority journal, trend study	NA	NA	NA	NA
n107	nPM107	31227916	Metabolomics of childhood exposure to perfluoroalkyl substances: a cross-sectional study	Kingsley SL, Walker DI, Calafat AM, Chen A, Papandonatos GD, Xu Y, Jones DP, Lanphear BP, Pennell KD, Braun JM.	Metabolomics. 2019 Jun 21;15(7):95. doi: 10.1007/s11306-019-1560-z.	Kingsley SL	Metabolomics	2019	2019-06-23	PMC7172933	NIHMS1552637	10.1007/s11306-019-1560-z	TRUE	nEm270	Metabolomics of childhood exposure to perfluoroalkyl substances: a cross-sectional study	NA	Kingsley S.L., Walker D.I., Calafat A.M., Chen A., Papandonatos G.D., Xu Y., Jones D.P., Lanphear B.P., Pennell K.D., Braun J.M.	(Kingsley S.L.; Braun J.M., Joseph_Braun_1@brown.edu) Department of Epidemiology, School of Public Health, Brown University, Box G-S121-2, Providence, RI, United States. , (Walker D.I.) Department of Environmental Medicine and Public Health, Icahn School of Medicine at Mount Sinai, New York, NY, United States. , (Calafat A.M.) Division of Laboratory Sciences, National Center for Environmental Hea…	J.M. Braun, Department of Epidemiology, School of Public Health, Brown University, Box G-S121-2, Providence, RI, United States. Email: Joseph_Braun_1@brown.edu	NA	2019-07-02	2019-07-03	Metabolomics (2019) 15:7 Article Number: 95. Date of Publication: 1 Jul 2019	Metabolomics	2019	15	7	NA	NA	2019-07-01	Article	NA	NA	NA	NA	1573-3890 (electronic),1573-3882	NA	Springer New York LLC, barbara.b.bertram@gsk.com	Introduction: Exposure to perfluoroalkyl substances (PFAS), synthetic and persistent chemicals used in commercial and industrial processes, are associated with cardiometabolic dysfunction and related risk factors including reduced birth weight, excess adiposity, and dyslipidemia. Identifying the metabolic changes induced by PFAS exposure could enhance our understanding of biological pathways unde…	NA	NA	NA	perfluorohexanesulfonic acid, perfluorononanoic acid, perfluorooctanesulfonic acid, perfluorooctanoic acid	exposure, metabolomics	article, child, cross-sectional study, electrospray, female, high performance liquid chromatography, human, hydrophilic interaction chromatography, limit of detection, liquid chromatography, male, mass spectrometry, retention time, reversed phase liquid chromatography	NA	NA	NA	NA
n108	nPM108	31125391	Are the civilization diseases the result of organohalogen environmental pollution?	GÃ³ralczyk K, Majcher A.	Acta Biochim Pol. 2019 May 24;66(2):123-127. doi: 10.18388/abp.2018_2776.	GÃ³ralczyk K	Acta Biochim Pol	2019	2019-05-25	NA	NA	10.18388/abp.2018_2776	TRUE	nEm282	Are the civilization diseases the result of organohalogen environmental pollution?	NA	GÃ³ralczyk K., Majcher A.	(GÃ³ralczyk K.) Institute of Ecology and Bioethics, Uniwersytet KardynaÅ‚a Stefana WyszyÅ„skiego, Warsaw, Poland. , (Majcher A.) Institute of Ecology and Bioethics, Uniwersytet KardynaÅ‚a Stefana WyszyÅ„skiego, Poland.	NA	NA	2019-07-11	2019-12-30	Acta biochimica Polonica (2019) 66:2 (123-127). Date of Publication: 24 May 2019	Acta biochimica Polonica	2019	66	2	123	127	2019-05-24	Review	NA	NA	NA	NA	1734-154X (electronic)	NA	NLM (Medline)	The notion of 'civilization diseases' is used to describe certain ailments whose aetiology is difficult to explain based on the knowledge about the functioning of the body and its metabolism. Only studies at the cellular level, on biochemical changes shed light on the causes of some diseases described as civilization diseases (cancers, cardiovascular and respiratory diseases, obesity, psychomotor…	NA	NA	NA	chlorinated hydrocarbon (adverse drug reaction, drug analysis), dioxin (adverse drug reaction), flame retardant (adverse drug reaction, drug analysis), furan derivative (adverse drug reaction), pesticide (adverse drug reaction, drug analysis), polychlorinated biphenyl (adverse drug reaction)	NA	adverse event, blood, breast feeding, environmental exposure, female, human, infant, male, neoplasm (etiology), newborn, obesity (etiology), preschool child	NA	NA	NA	NA
n109	nPM109	34464680	The role of maternal high fat diet on mouse pup metabolic endpoints following perinatal PFAS and PFAS mixture exposure	Marques ES, Agudelo J, Kaye EM, Modaresi SMS, Pfohl M, BeÄanovÃ¡ J, Wei W, Polunas M, Goedken M, Slitt AL.	Toxicology. 2021 Oct;462:152921. doi: 10.1016/j.tox.2021.152921. Epub 2021 Aug 28.	Marques ES	Toxicology	2021	2021-08-31	PMC8554779	NIHMS1736781	10.1016/j.tox.2021.152921	TRUE	nEm089	The role of maternal high fat diet on mouse pup metabolic endpoints following perinatal PFAS and PFAS mixture exposure	NA	Marques E.S., Agudelo J., Kaye E.M., Modaresi S.M.S., Pfohl M., BeÄanovÃ¡ J., Wei W., Polunas M., Goedken M., Slitt A.L.	(Marques E.S.; Agudelo J.; Kaye E.M.; Modaresi S.M.S.; Pfohl M.; Wei W.; Slitt A.L., aslitt@uri.edu) Department of Biomedical and Pharmaceutical Sciences, College of Pharmacy, University of Rhode Island, 7 Greenhouse Rd, Kingston, RI, United States. , (BeÄanovÃ¡ J.) Graduate School of Oceanography, University of Rhode Island, 215 S Ferry Rd, Narragansett, RI, United States. , (Polunas M.; Goedke…	A.L. Slitt, Department of Biomedical and Pharmaceutical Sciences, College of Pharmacy, University of Rhode Island, 7 Greenhouse Rd, Kingston, RI, United States. Email: aslitt@uri.edu	NA	2021-09-15	2022-01-26	Toxicology (2021) 462 Article Number: 152921. Date of Publication: 1 Oct 2021	Toxicology	2021	462	NA	NA	NA	2021-10-01	Article	NA	NA	NA	NA	1879-3185 (electronic),0300-483X	NA	Elsevier Ireland Ltd	Per- and polyfluoroalkyl substances (PFAS) are a family of chemicals that are ubiquitous in the environment. Some of these chemicals, such as perfluorooctanesulfonic acid (PFOS), perfluorohexanesulfonate (PFHxS) and perfluorooctanoic acid (PFOA), are found in human sera and have been shown to cause liver steatosis and reduce postnatal survival and growth in rodents. The purpose of this work is to…	NA	Liver,Mixtures,Perfluoroalkyl substances (PFAS),Perinatal	fat, perfluorohexanesulfonic acid (drug combination, drug toxicity, oral drug administration), perfluorooctanesulfonic acid (drug combination, drug toxicity, oral drug administration), perfluorooctanoic acid (drug combination, drug toxicity, oral drug administration)	adiponectin (endogenous compound), alanine aminotransferase (endogenous compound), hemoglobin A1c (endogenous compound), leptin (endogenous compound), triacylglycerol (endogenous compound)	lipid diet, liver metabolism, liver toxicity, maternal nutrition, perinatal exposure	alanine aminotransferase blood level, animal experiment, animal tissue, article, body weight, chow diet, controlled study, dam (animal), dietary intake, drug mixture, female, gestational age, hemoglobin blood level, lipid liver level, liver tissue, liver weight, male, mouse, Mus musculus, nonhuman, perinatal period, pregnancy, pup (rodent), risk assessment, serum, triacylglycerol blood level	NA	Sigma Aldrich (United States)	NA	NA
n110	nPM110	30368134	Neonatal and juvenile exposure to perfluorooctanoate (PFOA) and perfluorooctane sulfonate (PFOS): Advance puberty onset and kisspeptin system disturbance in female rats	Du G, Hu J, Huang Z, Yu M, Lu C, Wang X, Wu D.	Ecotoxicol Environ Saf. 2019 Jan 15;167:412-421. doi: 10.1016/j.ecoenv.2018.10.025. Epub 2018 Oct 24.	Du G	Ecotoxicol Environ Saf	2019	2018-10-28	NA	NA	10.1016/j.ecoenv.2018.10.025	TRUE	nEm300	Neonatal and juvenile exposure to perfluorooctanoate (PFOA) and perfluorooctane sulfonate (PFOS): Advance puberty onset and kisspeptin system disturbance in female rats	NA	Du G., Hu J., Huang Z., Yu M., Lu C., Wang X., Wu D.	(Du G., guizhendu@njmu.edu.cn; Huang Z.; Yu M.; Lu C.; Wang X.; Wu D., diwu@njmu.edu.cn) State Key Laboratory of Reproductive Medicine, Institute of Toxicology, Nanjing Medical University, Nanjing, China. , (Du G., guizhendu@njmu.edu.cn; Huang Z.; Yu M.; Lu C.; Wang X.; Wu D., diwu@njmu.edu.cn) Key Laboratory of Modern Toxicology of Ministry of Education, School of Public Health, Nanjing Medical …	G. Du, State Key Laboratory of Reproductive Medicine, Institute of Toxicology, Nanjing Medical University, Nanjing, China. Email: guizhendu@njmu.edu.cn	NA	2018-10-29	2018-11-06	Ecotoxicology and Environmental Safety (2019) 167 (412-421). Date of Publication: 15 Jan 2019	Ecotoxicology and Environmental Safety	2019	167	NA	412	421	2019-01-15	Article	NA	NA	NA	NA	1090-2414 (electronic),0147-6513	NA	Academic Press	Perfluorooctanoate (PFOA) and perfluorooctane sulfonate (PFOS) are widespread and persistent chemicals in the environment, and limited data about their effects on puberty development are available. In order to explore the effects of neonatal and juvenile PFOA/PFOS exposure on puberty maturation, female rats were injected with PFOA or PFOS at 0.1, 1 and 10 mg/kg/day during postnatal day (PND) 1â€“…	NA	Hypothalamus,Kisspeptin/GPR54,PFOA,PFOS,Puberty	Kiss1 receptor (endogenous compound), metastin (endogenous compound), perfluorooctanesulfonic acid (drug toxicity), perfluorooctanoic acid (drug toxicity)	estradiol (endogenous compound), estrogen receptor alpha (endogenous compound), estrogen receptor beta (endogenous compound), luteinizing hormone (endogenous compound), messenger RNA (endogenous compound)	developmental toxicity, puberty, reproductive toxicity	animal cell, animal experiment, animal model, animal tissue, anogenital distance, arcuate nucleus, article, body weight gain, controlled study, down regulation, environmental exposure, estradiol blood level, estrus cycle, female, gene expression, histology, hypothalamic anteroventral periventricular, hypothalamus, luteinizing hormone blood level, newborn, nonhuman, organ weight, ovary follicle, o…	NA	NA	NA	NA
n111	nPM111	34171588	Prospective associations of mid-childhood plasma per- and polyfluoroalkyl substances and pubertal timing	Carwile JL, Seshasayee SM, Aris IM, Rifas-Shiman SL, Claus Henn B, Calafat AM, Sagiv SK, Oken E, Fleisch AF.	Environ Int. 2021 Nov;156:106729. doi: 10.1016/j.envint.2021.106729. Epub 2021 Jun 23.	Carwile JL	Environ Int	2021	2021-06-25	PMC8380705	NIHMS1719792	10.1016/j.envint.2021.106729	TRUE	nEm084	Prospective associations of mid-childhood plasma per- and polyfluoroalkyl substances and pubertal timing	NA	Carwile J.L., Seshasayee S.M., Aris I.M., Rifas-Shiman S.L., Claus Henn B., Calafat A.M., Sagiv S.K., Oken E., Fleisch A.F.	(Carwile J.L., jcarwile@mmc.org; Seshasayee S.M.; Fleisch A.F.) Center for Outcomes Research and Evaluation, Maine Medical Center Research Institute, Portland, ME, United States. , (Aris I.M.; Rifas-Shiman S.L.; Oken E.) Division of Chronic Disease Research Across the Lifecourse, Department of Population Medicine, Harvard Medical School and Harvard Pilgrim Health Care Institute, Boston, MA, Unite…	J.L. Carwile, Center for Outcomes Research and Evaluation, Maine Medical Center Research Institute, 509 Forest Ave, Portland, ME, United States. Email: jcarwile@mmc.org	NA	2021-07-01	2021-12-16	Environment International (2021) 156 Article Number: 106729. Date of Publication: 1 Nov 2021	Environment International	2021	156	NA	NA	NA	2021-11-01	Article	NA	NA	NA	NA	1873-6750 (electronic),0160-4120	NA	Elsevier Ltd	Background: Exposure to per- and polyfluoroalkyl substances (PFAS) may disrupt pubertal timing. Higher PFAS plasma concentrations have been associated with later pubertal timing in girls, but cross-sectional findings may be explained by reverse causation. Objectives: To assess prospective associations between PFAS plasma concentrations in mid-childhood and markers of pubertal timing in male and f…	NA	NA	chemical compound (special situation for pharmacovigilance), per and polyfluoroalkyl substance (special situation for pharmacovigilance)	2 (n methyl perfluorooctane sulfonamide)acetate (special situation for pharmacovigilance), perfluorodecanoate (special situation for pharmacovigilance), perfluorodimethylhexane sulfonate (special situation for pharmacovigilance), perfluorodimethylhexanoate (special situation for pharmacovigilance), perfluorohexanesulfonic acid (special situation for pharmacovigilance), perfluoromethylheptane sulf…	adolescence, blood level, childhood, puberty	adolescent, adult, article, body height, child, cohort analysis, controlled study, cross-sectional study, environmental exposure, female, human, kernel method, male, Massachusetts, menarche, parent, population research, proportional hazards model, prospective study, statistical analysis	NA	NA	NA	NA
n112	nPM112	36183877	Breastfed infants' exposure to polychlorinated biphenyls, polychlorinated dibenzo-p-dioxins and dibenzofurans, and per- and polyfluoroalkyl substances: A cross-sectional study of a municipal waste incinerator in China	Xu P, Zheng Y, Wang X, Shen H, Wu L, Chen Y, Xu D, Xiang J, Cheng P, Chen Z, Lou X.	Chemosphere. 2022 Dec;309(Pt 2):136639. doi: 10.1016/j.chemosphere.2022.136639. Epub 2022 Sep 29.	Xu P	Chemosphere	2022	2022-10-02	NA	NA	10.1016/j.chemosphere.2022.136639	TRUE	nEm008	Breastfed infantsâ€™ exposure to polychlorinated biphenyls, polychlorinated dibenzo-p-dioxins and dibenzofurans, and per- and polyfluoroalkyl substances: A cross-sectional study of a municipal waste incinerator in China	NA	Xu P., Zheng Y., Wang X., Shen H., Wu L., Chen Y., Xu D., Xiang J., Cheng P., Chen Z., Lou X.	(Xu P.; Zheng Y.; Wang X.; Shen H.; Wu L.; Chen Y.; Xu D.; Xiang J.; Cheng P.; Chen Z., zhjchen@cdc.zj.cn; Lou X., xmlou@cdc.zj.cn) Zhejiang Provincial Center for Disease Control and Prevention, 3399 Bin Sheng Road, Binjiang District, Hangzhou, China.	Z. Chen, Zhejiang Provincial Center for Disease Control and Prevention, 3399 Bin Sheng Road, Binjiang District, Hangzhou, China. Email: zhjchen@cdc.zj.cn""X. Lou, Zhejiang Provincial Center for Disease Control and Prevention, 3399 Bin Sheng Road, Binjiang District, Hangzhou, China. Email: xmlou@cdc.zj.cn	NA	2022-10-26	2022-10-31	Chemosphere (2022) 309 Article Number: 136639. Date of Publication: 1 Dec 2022	Chemosphere	2022	309	NA	NA	NA	2022-12-01	Article	NA	NA	NA	NA	1879-1298 (electronic),0045-6535	NA	Elsevier Ltd	A municipal waste incinerator (MWI) in Zhejiang, China, operating since 2008 was completely reconstructed from 2016 to 2019. In 2013, we conducted a cross-sectional study of breastfeeding mothers living near the MWI. We evaluated the concentrations of polychlorinated biphenyls (PCBs) and polychlorinated dibenzo-p-dioxins and dibenzofurans (PCDD/Fs) in the mothers' breast milk and their infants' e…	NA	Breast milk,PCBs,PCDD/Fs,PFASs,Waste incinerator	alkyl group, dibenzofuran derivative, per and polyfluoroalkyl substance, perfluoro compound, polychlorinated biphenyl derivative, polychlorinated dibenzodioxin	unclassified drug	breast feeding, incineration, municipal waste	adult, article, body weight, breast milk, China, cross-sectional study, estimated daily intake, female, health hazard, human, infant, mother	NA	NA	NA	NA
n113	nPM113	29347948	Prenatal exposure to persistent organic pollutants and child overweight/obesity at 5-year follow-up: a prospective cohort study	Lauritzen HB, Larose TL, Ã˜ien T, Sandanger TM, Odland JÃ˜, van de Bor M, Jacobsen GW.	Environ Health. 2018 Jan 18;17(1):9. doi: 10.1186/s12940-017-0338-x.	Lauritzen HB	Environ Health	2018	2018-01-20	PMC5774128	NA	10.1186/s12940-017-0338-x	TRUE	nEm361	Prenatal exposure to persistent organic pollutants and child overweight/obesity at 5-year follow-up: A prospective cohort study	NA	Lauritzen H.B., Larose T.L., Ã˜ien T., Sandanger T.M., Odland J.O., Van De Bor M., Jacobsen G.W.	(Lauritzen H.B., hilde.b.lauritzen@ntnu.no; Larose T.L., tricia.larose@ntnu.no; Ã˜ien T., torbjorn.oien@ntnu.no; Jacobsen G.W., geir.jacobsen@ntnu.no) Department of Public Health and Nursing, Faculty of Medicine and Health Sciences, Norwegian University of Science and Technology, Trondheim, Norway. , (Sandanger T.M., torkjel.sandanger@uit.no; Odland J.O., jon.oyvind.odland@uit.no) Department of C…	H.B. Lauritzen, Department of Public Health and Nursing, Faculty of Medicine and Health Sciences, Norwegian University of Science and Technology, Trondheim, Norway. Email: hilde.b.lauritzen@ntnu.no	NA	2018-01-29	2019-01-11	Environmental Health: A Global Access Science Source (2018) 17:1 Article Number: 9. Date of Publication: 18 Jan 2018	Environmental Health: A Global Access Science Source	2018	17	1	NA	NA	2018-01-18	Article	NA	NA	NA	NA	1476-069X (electronic)	NA	BioMed Central Ltd., info@biomedcentral.com	Background: Prenatal exposure to persistent organic pollutants (POPs), may influence offspring weight gain. More prospective epidemiological studies are needed to compliment the growing body of evidence from animal studies. Methods: Serum from 412 pregnant Norwegian and Swedish women participating in a Scandinavian prospective cohort study were collected in 1986-88, and analyses of two perfluoroa…	NA	Childhood obesity,Endocrine disrupting chemicals,Non-monotonic dose-response relationship,Organochlorines,Perfluoroalkyl substances,Pregnancy,Skinfolds	NA	beta hexachlorohexane, hexachlorobenzene, nonachlor, organochlorine derivative, oxychlordane, p,p' dichlorodiphenyldichloroehylene, p,p' dichlorophenyltrichloroethane, perfluorooctanesulfonic acid, perfluorooctanoic acid, polychlorinated biphenyl, unclassified drug	childhood obesity, persistent organic pollutant, prenatal exposure	adult, article, blood level, body mass, child, cohort analysis, correlational study, female, first trimester pregnancy, follow up, gestation period, human, male, maternal age, maternal serum, Norwegian (people), pregnant woman, preschool child, priority journal, progeny, prospective study, skinfold thickness, Sweden, triceps brachii muscle	NA	NA	NA	NA
n114	nPM114	32359999	Per- and polyfluoroalkyl substances in paired dust and carpets from childcare centers	Wu Y, Romanak K, Bruton T, Blum A, Venier M.	Chemosphere. 2020 Jul;251:126771. doi: 10.1016/j.chemosphere.2020.126771. Epub 2020 Apr 12.	Wu Y	Chemosphere	2020	2020-05-04	NA	NA	10.1016/j.chemosphere.2020.126771	TRUE	nEm204	Per- and polyfluoroalkyl substances in paired dust and carpets from childcare centers	NA	Wu Y., Romanak K., Bruton T., Blum A., Venier M.	(Wu Y.; Romanak K.; Venier M., mvenier@indiana.edu) O'Neill School of Public and Environmental Affairs, Indiana University, Bloomington, IN, United States. , (Bruton T.; Blum A.) Green Science Policy Institute, Berkeley, CA, United States.	M. Venier, O'Neill School of Public and Environmental Affairs, Indiana University, Bloomington, IN, United States. Email: mvenier@indiana.edu	NA	2020-05-04	2020-05-04	Chemosphere (2020) 251 Article Number: 126771. Date of Publication: 1 Jul 2020	Chemosphere	2020	251	NA	NA	NA	2020-07-01	Article	NA	NA	NA	NA	1879-1298 (electronic),0045-6535	NA	Elsevier Ltd	Carpets can be a significant source of per- and polyfluoroalkyl substances (PFASs) in the indoor environment and may be an especially important source of exposure for children and toddlers. Most previous studies focused on measuring indoor dust only. In this study, we measured PFAS concentrations in paired carpet and dust samples from 18 California childcare centers in 2018 to investigate carpet …	NA	Carpets,Childcare,Indoor dust,PFAS	NA	NA	child care	article, body weight, California, child, controlled study, human, ingestion	NA	NA	NA	NA
n115	nPM115	30739020	The derivation of a Reference Dose (RfD) for perfluorooctane sulfonate (PFOS) based on immune suppression	Pachkowski B, Post GB, Stern AH.	Environ Res. 2019 Apr;171:452-469. doi: 10.1016/j.envres.2018.08.004. Epub 2018 Aug 8.	Pachkowski B	Environ Res	2019	2019-02-11	NA	NA	10.1016/j.envres.2018.08.004	TRUE	nEm289	The derivation of a Reference Dose (RfD) for perfluorooctane sulfonate (PFOS) based on immune suppression	NA	Pachkowski B., Post G.B., Stern A.H.	(Pachkowski B., Brian.Pachkowski@dep.nj.gov; Post G.B., Gloria.Post@dep.nj.gov; Stern A.H., ahstern1@verizon.net) Bureau for Risk Analysis, Division of Science, Research and Environmental Health, New Jersey Department of Environmental Protection, Trenton, NJ, United States.	B. Pachkowski, Division of Science, Research and Environmental Health, 428 East State Street, Mail Code 428-01, PO Box 420, Trenton, NJ, United States. Email: Brian.Pachkowski@dep.nj.gov	NA	2019-02-14	2020-01-31	Environmental Research (2019) 171 (452-469). Date of Publication: 1 Apr 2019	Environmental Research	2019	171	NA	452	469	2019-04-01	Review	NA	NA	NA	NA	1096-0953 (electronic),0013-9351	NA	Academic Press Inc., apjcs@harcourt.com	Exposure to perfluorooctane sulfonate (PFOS) is ubiquitous in populations and environments worldwide. Its long half-life in humans, indefinite persistence in the environment, and awareness of its widespread presence in drinking water make the human health assessment of PFOS a priority. While developmental, endocrine, and hepatic effects, and increased serum cholesterol are among the outcomes resu…	NA	Immunotoxicity,Per- and polyfluoroalkyl substances,Perfluorooctane sulfonate,Reference dose,Risk assessment	perfluorooctanesulfonic acid	drinking water	analytical parameters, dose, immunosuppressive treatment, reference dose	cholesterol blood level, immune response, immunotoxicity, infection, nonhuman, plaque forming cell, priority journal, review	NA	NA	NA	NA
n116	nPM116	29223808	Perfluoroalkyl acid levels in first-time mothers in relation to offspring weight gain and growth	Gyllenhammar I, Diderholm B, Gustafsson J, Berger U, Ridefelt P, Benskin JP, Lignell S, Lampa E, Glynn A.	Environ Int. 2018 Feb;111:191-199. doi: 10.1016/j.envint.2017.12.002. Epub 2017 Dec 20.	Gyllenhammar I	Environ Int	2018	2017-12-11	NA	NA	10.1016/j.envint.2017.12.002	TRUE	nEm358	Perfluoroalkyl acid levels in first-time mothers in relation to offspring weight gain and growth	NA	Gyllenhammar I., Diderholm B., Gustafsson J., Berger U., Ridefelt P., Benskin J.P., Lignell S., Lampa E., Glynn A.	(Gyllenhammar I., Irina.gyllenhammar@slv.se; Lignell S.; Glynn A.) National Food Agency, P.O. Box 622, Uppsala, Sweden. , (Diderholm B.; Gustafsson J.) Department of Women's and Children's Health, Uppsala University, Uppsala, Sweden. , (Berger U.; Benskin J.P.) Department of Environmental Science and Analytical Chemistry (ACES), Stockholm University, Stockholm, Sweden. , (Berger U.) Department An…	I. Gyllenhammar, National Food Agency, P.O. Box 622, Uppsala, Sweden. Email: Irina.gyllenhammar@slv.se	NA	2017-12-15	2020-12-11	Environment International (2018) 111 (191-199). Date of Publication: 1 Feb 2018	Environment International	2018	111	NA	191	199	2018-02-01	Article	NA	NA	NA	NA	1873-6750 (electronic),0160-4120	NA	Elsevier Ltd	We investigated if maternal body burdens of perfluoroalkyl acids (PFAAs) at the time of delivery are associated with birth outcome and if early life exposure (in utero/nursing) is associated with early childhood growth and weight gain. Maternal PFAA body burdens were estimated by analysis of serum samples from mothers living in Uppsala County, Sweden (POPUP), sampled three weeks after delivery be…	NA	NA	perfluoro compound, perfluoroalkyl acid	creatinine (endogenous compound), cystatin C (endogenous compound), perfluorobutanesulfonic acid, perfluorodecanoic acid, perfluorohexanesulfonic acid, perfluorononanoic acid, perfluorooctanesulfonic acid, perfluorooctanoic acid, perfluoroundecanoic acid, unclassified drug	body weight gain, child growth, maternal blood, progeny	adult, article, body height, body mass, child, controlled study, creatinine blood level, female, glomerulus filtration rate, head circumference, human, infant, limit of detection, male, maternal exposure, measurement accuracy, prenatal exposure, priority journal, signal noise ratio	NA	NA	NA	NA
n117	nPM117	34273704	Associations of paternal and maternal per- and polyfluoroalkyl substances exposure with cord serum reproductive hormones, placental steroidogenic enzyme and birth weight	Yao Q, Gao Y, Zhang Y, Qin K, Liew Z, Tian Y.	Chemosphere. 2021 Dec;285:131521. doi: 10.1016/j.chemosphere.2021.131521. Epub 2021 Jul 12.	Yao Q	Chemosphere	2021	2021-07-17	NA	NA	10.1016/j.chemosphere.2021.131521	TRUE	nEm074	Associations of paternal and maternal per- and polyfluoroalkyl substances exposure with cord serum reproductive hormones, placental steroidogenic enzyme and birth weight	NA	Yao Q., Gao Y., Zhang Y., Qin K., Liew Z., Tian Y.	(Yao Q.; Gao Y.; Zhang Y.; Tian Y., tianmiejp@sjtu.edu.cn) Department of Environmental Health, School of Public Health, Shanghai Jiao Tong University School of Medicine, Shanghai, China. , (Qin K.) Institute of Inspection and Supervision, Shanghai Municipal Health Commission, Shanghai, China. , (Liew Z., zeyan.liew@yale.edu) Department of Environmental Health Sciences, Yale School of Public Healt…	Y. Tian, Department of Environmental Health, School of Public Health, Shanghai Jiao Tong University School of Medicine, 280 South Chongqing Road, Shanghai, China. Email: tianmiejp@sjtu.edu.cn""Z. Liew, Department of Environmental Health Sciences, Yale School of Public Health, 60 College Street, New Haven, CT, United States. Email: zeyan.liew@yale.edu	NA	2021-07-23	2021-11-18	Chemosphere (2021) 285 Article Number: 131521. Date of Publication: 1 Dec 2021	Chemosphere	2021	285	NA	NA	NA	2021-12-01	Article	NA	NA	NA	NA	1879-1298 (electronic),0045-6535	NA	Elsevier Ltd	Background: Maternal per- and polyfluoroalkyl substances (PFAS) exposure has been associated with placental function and fetal growth measures. However, few studies have simultaneously investigated paternal and maternal exposure effects. Objectives: We evaluated the associations of paternal or maternal PFAS levels with placental function and fetal growth measures. Methods: We studied six PFAS mea…	NA	Birth weight,Familial confounding,Parental PFAS comparisons,Per- and polyfluoroalkyl substances,Reproductive hormones	perfluorodecanoic acid, perfluorohexanesulfonic acid, perfluorononanoic acid, perfluorooctanesulfonic acid, perfluorooctanoic acid, perfluoroundecanoic acid	aromatase (endogenous compound), estradiol (endogenous compound), hormone (endogenous compound), testosterone (endogenous compound)	birth weight, cord serum, fetus growth, maternal exposure, paternal exposure, placenta function, steroidogenesis	adult, article, China, cohort analysis, controlled study, correlational study, demography, enzyme linked immunosorbent assay, female, high performance liquid chromatography, human, limit of detection, limit of quantitation, male, maternal smoking, outcome assessment, paternal smoking, pregnant woman, radioimmunoassay kit, sensitivity analysis, signal noise ratio, social status	NA	NA	NA	NA
n118	nPM118	35952751	Physical activity modifies the relation between gestational perfluorooctanoic acid exposure and adolescent cardiometabolic risk	Braun JM, Papandonatos GD, Li N, Sears CG, Buckley JP, Cecil KM, Chen A, Eaton CB, Kalkwarf HJ, Kelsey KT, Lanphear BP, Yolton K.	Environ Res. 2022 Nov;214(Pt 3):114021. doi: 10.1016/j.envres.2022.114021. Epub 2022 Aug 8.	Braun JM	Environ Res	2022	2022-08-11	PMC9637371	NIHMS1843259	10.1016/j.envres.2022.114021	TRUE	nEm012	Physical activity modifies the relation between gestational perfluorooctanoic acid exposure and adolescent cardiometabolic risk	NA	Braun J.M., Papandonatos G.D., Li N., Sears C.G., Buckley J.P., Cecil K.M., Chen A., Eaton C.B., Kalkwarf H.J., Kelsey K.T., Lanphear B.P., Yolton K.	(Braun J.M., joseph_braun_1@brown.edu; Li N.; Eaton C.B.; Kelsey K.T.) Department of Epidemiology, Brown University, Box G-S121, Providence, RI, United States. , (Papandonatos G.D.) Department of Biostatistics, School of Public Health, Brown University, Providence, RI, United States. , (Sears C.G.) Division of Environmental Medicine, Department of Medicine, University of Louisville, Louisville, K…	J.M. Braun, Department of Epidemiology, Brown University, Box G-S121, Providence, RI, United States. Email: joseph_braun_1@brown.edu	NA	2022-08-19	2022-10-05	Environmental Research (2022) 214 Article Number: 114021. Date of Publication: 1 Nov 2022	Environmental Research	2022	214	NA	NA	NA	2022-11-01	Article	NA	NA	NA	NA	1096-0953 (electronic),0013-9351	NA	Academic Press Inc.	Objective: Exposure to per- and polyfluoroalkyl substances (PFAS) â€“ endocrine disrupting chemicals â€“ may increase cardiometabolic risk. We evaluated whether adolescent lifestyle factors modified associations between gestational PFAS exposure and cardiometabolic risk using a prospective cohort study. Methods: In 166 mother-child pairs (HOME Study), we measured concentrations of four PFAS in ma…	NA	Adolescent,Endocrine disruptors,Epidemiology,Perfluoroalkyl substances	perfluorooctanoic acid	adiponectin (endogenous compound), cotinine (endogenous compound), glucose (endogenous compound), high density lipoprotein (endogenous compound), insulin (endogenous compound), leptin (endogenous compound), perfluorohexanesulfonic acid, perfluorooctanesulfonic acid, tobacco smoke, triacylglycerol (endogenous compound)	cardiometabolic risk, diet, lifestyle, physical activity, prenatal exposure	accelerometry, actimetry, adipose tissue, adolescent, adult, article, Black person, blood pressure measurement, blood sampling, body height, body mass, body weight, breast feeding, Caucasian, child, cohort analysis, controlled study, directed acyclic graph, dual energy X ray absorptiometry, dyslipidemia, fasting, fasting blood glucose level, fasting insulin level, female, follow up, graduate, hai…	NA	NA	NA	NA
n119	nPM119	21482639	Prenatal perfluorooctanoic acid exposure in CD-1 mice: low-dose developmental effects and internal dosimetry	Macon MB, Villanueva LR, Tatum-Gibbs K, Zehr RD, Strynar MJ, Stanko JP, White SS, Helfant L, Fenton SE.	Toxicol Sci. 2011 Jul;122(1):134-45. doi: 10.1093/toxsci/kfr076. Epub 2011 Apr 11.	Macon MB	Toxicol Sci	2011	2011-04-13	PMC3143465	NA	10.1093/toxsci/kfr076	TRUE	nEm620	Prenatal perfluorooctanoic acid exposure in CD-1 mice: Low-dose developmental effects and internal dosimetry	NA	Macon M.B., Villanueva L.R., Tatum-Gibbs K., Zehr R.D., Strynar M.J., Stanko J.P., White S.S., Helfant L., Fenton S.E.	(Macon M.B.; Tatum-Gibbs K.) Curriculum in Toxicology, University of North Carolina, School of Medicine, Chapel Hill, NC 25799, United States. , (Macon M.B.; Stanko J.P.; White S.S.; Fenton S.E., fentonse@niehs.nih.gov) Cellular and Molecular Pathology, National Toxicology Program, National Institute of Environmental Health Sciences, National Institute of Health, Research Triangle Park, NC 27711,…	S.E. Fenton, PO Box 12233, Building 101, Mail Drop E1-08, Research Triangle Park, NC 27709, United States. Email: fentonse@niehs.nih.gov	NA	2011-08-09	2021-07-13	Toxicological Sciences (2011) 122:1 (134-145). Date of Publication: 1 Jul 2011	Toxicological Sciences	2011	122	1	134	145	2011-07-01	Article	NA	NA	NA	NA	1096-0929 (electronic),1096-6080	NA	Oxford University Press	Perfluorooctanoic acid (PFOA) is an environmental contaminant that causes adverse developmental effects in laboratory animals. To investigate the low-dose effects of PFOA on offspring, timed-pregnant CD-1 mice were gavage dosed with PFOA for all or half of gestation. In the full-gestation study, mice were administered 0, 0.3, 1.0, and 3.0 mg PFOA/kg body weight (BW)/day from gestation days (GD) 1…	NA	Development,Dosimetry,Mammary gland,Perfluorooctanoic acid,Prenatal	perfluorooctanoic acid (drug toxicity)	NA	developmental disorder, dosimetry, prenatal exposure	animal experiment, animal model, animal tissue, article, blood level, brain level, breast development, breast epithelium, controlled study, dose response, female, gestational age, liver level, liver weight, mammary gland, mouse, mouse strain, newborn, nonhuman, progeny, scoring system	NA	NA	NA	NA
n120	nPM120	19429401	Perfluoroalkyl chemicals and human fetal development: an epidemiologic review with clinical and toxicological perspectives	Olsen GW, Butenhoff JL, Zobel LR.	Reprod Toxicol. 2009 Jun;27(3-4):212-230. doi: 10.1016/j.reprotox.2009.02.001. Epub 2009 Feb 20.	Olsen GW	Reprod Toxicol	2009	2009-05-12	NA	NA	10.1016/j.reprotox.2009.02.001	TRUE	nEm673	Perfluoroalkyl chemicals and human fetal development: An epidemiologic review with clinical and toxicological perspectives	NA	Olsen G.W., Butenhoff J.L., Zobel L.R.	(Olsen G.W., gwolsen@mmm.com; Butenhoff J.L.; Zobel L.R.) Medical Department, 3M Company, St. Paul, MN 55144, United States.	G.W. Olsen, Medical Department, 3M Company, St. Paul, MN 55144, United States. Email: gwolsen@mmm.com	NA	NA	2009-05-12	Reproductive Toxicology (2009) 27:3-4 (212-230). Date of Publication: June 2009	Reproductive Toxicology	2009	27	2023-03-04	212	230	2023-06-09	Article	NA	NA	NA	NA	0890-6238	NA	Elsevier Inc., 360 Park Avenue South, New York, United States.	Epidemiologists began to focus on human developmental outcomes with perfluorooctanesulfonate (PFOS) and perfluorooctanoate (PFOA) as a consequence of dose-dependent developmental toxicological studies that reported effects of lowered birth weight, increased postnatal mortality, and decreased postnatal growth in surviving rats and mice. Contributing to the epidemiologic interest was the widespread…	NA	Birth weight,Epidemiology,Fecundity,Human fetal development,Perfluoroalkyls,Perfluorooctanesulfonate,Perfluorooctanoate,PFOA,PFOS	perfluoro compound (drug toxicity), perfluorooctanesulfonic acid (drug toxicity), perfluorooctanoic acid (drug toxicity)	drinking water	fetus development	anthropometry, article, birth weight, blood level, dose response, growth retardation, health hazard, postnatal growth, water contamination	NA	NA	NA	NA
n121	nPM121	30311695	Prevalence and predictors of anal incontinence 6 years after first delivery	Johannessen HH, Stafne SN, Falk RS, Stordahl A, Wibe A, MÃ¸rkved S.	Neurourol Urodyn. 2019 Jan;38(1):310-319. doi: 10.1002/nau.23854. Epub 2018 Oct 12.	Johannessen HH	Neurourol Urodyn	2019	2018-10-13	NA	NA	10.1002/nau.23854	TRUE	nEm307	Prevalence and predictors of anal incontinence 6 years after first delivery	NA	Johannessen H.H., Stafne S.N., Falk R.S., Stordahl A., Wibe A., MÃ¸rkved S.	(Johannessen H.H., hege.holmo.johannessen@so-hf.no) Department of Physical Medicine and Rehabilitation, Ã˜stfold Hospital Trust, Sarpsborg, Norway. , (Stafne S.N.; MÃ¸rkved S.) Department of Public Health and Nursing, Norwegian University of Science and Technology, Trondheim, Norway. , (Stafne S.N.) Department of Physiotherapy, St. Olavs Hospital Trondheim University Hospital, Trondheim, Norway. …	H.H. Johannessen, Department of Physical Medicine and Rehabilitation, Ã˜stfold Hospital Trust, Sarpsborg, Norway. Email: hege.holmo.johannessen@so-hf.no	NA	2018-10-23	2019-01-11	Neurourology and Urodynamics (2019) 38:1 (310-319). Date of Publication: 1 Jan 2019	Neurourology and Urodynamics	2019	38	1	310	319	2019-01-01	Article	NA	NA	NA	NA	1520-6777 (electronic),0733-2467	NA	John Wiley and Sons Inc., P.O.Box 18667, Newark, United States.	Aims: The main aim of the present study, was to explore prevalence and predictors of anal incontinence (AI) experienced 6 years after first delivery. Methods: In this longitudinal prospective cohort study, participants in a previous study answered questions about AI 6 years after first delivery using postal or digital questionnaires. Prevalence of AI was calculated, and multivariable logistic reg…	NA	anal incontinence,long-term follow-up,postpartum	NA	NA	feces incontinence (epidemiology), obstetric delivery	adult, anus injury, article, body mass, cohort analysis, defecation urgency, disease duration, enteropathy, female, human, instrumental delivery, longitudinal study, major clinical study, maternal age, prevalence, primipara, risk factor, third trimester pregnancy	NA	NA	NA	NA
n122	nPM122	19049861	The relationship between birth weight, gestational age and perfluorooctanoic acid (PFOA)-contaminated public drinking water	Nolan LA, Nolan JM, Shofer FS, Rodway NV, Emmett EA.	Reprod Toxicol. 2009 Jun;27(3-4):231-238. doi: 10.1016/j.reprotox.2008.11.001. Epub 2008 Nov 13.	Nolan LA	Reprod Toxicol	2009	2008-12-04	PMC3039136	NIHMS266553	10.1016/j.reprotox.2008.11.001	TRUE	nEm669	The relationship between birth weight, gestational age and perfluorooctanoic acid (PFOA)-contaminated public drinking water	NA	Nolan L.A., Nolan J.M., Shofer F.S., Rodway N.V., Emmett E.A.	(Nolan L.A.; Shofer F.S.; Emmett E.A., emmetted@mail.med.upenn.edu) Center of Excellence in Environmental Toxicology, University of Pennsylvania School of Medicine, Philadelphia, PA, United States. , (Nolan J.M.) Department of Pediatrics, New York University School of Medicine, New York, NY, United States. , (Rodway N.V.) Division of Occupational Medicine, The Ohio State University College of Med…	E.A. Emmett, Center of Excellence in Environmental Toxicology, University of Pennsylvania School of Medicine, Philadelphia, PA, United States. Email: emmetted@mail.med.upenn.edu	NA	NA	2009-05-12	Reproductive Toxicology (2009) 27:3-4 (231-238). Date of Publication: June 2009	Reproductive Toxicology	2009	27	2023-03-04	231	238	2023-06-09	Article	NA	NA	NA	NA	0890-6238	NA	Elsevier Inc., 360 Park Avenue South, New York, United States.	Background: Recent studies have examined the associations between perfluorooctanoic acid (PFOA) levels in cord blood and maternal plasma with lowered birth weight and gestational age in humans; however, no study has examined these effects in a population of known high PFOA exposure. Residents drinking PFOA-contaminated water from the Little Hocking Water Association (LHWA) in Washington County, O…	NA	Birth weight,C8,Fetal development,Gestational age,Little hocking water,Low birth weight,Perflurooctanoic acid,PFOA,Preterm gestation	drinking water, perfluorooctanoic acid (drug toxicity)	NA	birth weight, gestational age, water contamination	adult, aged, article, blood level, female, human, low birth weight, male, maternal blood, newborn, premature labor, prematurity, race, social status, umbilical cord blood	NA	NA	NA	NA
n123	nPM123	31340646	Neurodevelopmental and Metabolomic Responses from Prenatal Coexposure to Perfluorooctanesulfonate (PFOS) and Methylmercury (MeHg) in Sprague-Dawley Rats	Reardon AJF, Karathra J, Ribbenstedt A, Benskin JP, MacDonald AM, Kinniburgh DW, Hamilton TJ, Fouad K, Martin JW.	Chem Res Toxicol. 2019 Aug 19;32(8):1656-1669. doi: 10.1021/acs.chemrestox.9b00192. Epub 2019 Aug 8.	Reardon AJF	Chem Res Toxicol	2019	2019-07-26	NA	NA	10.1021/acs.chemrestox.9b00192	TRUE	nEm263	Neurodevelopmental and Metabolomic Responses from Prenatal Coexposure to Perfluorooctanesulfonate (PFOS) and Methylmercury (MeHg) in Sprague-Dawley Rats	NA	Reardon A.J.F., Karathra J., Ribbenstedt A., Benskin J.P., Macdonald A.M., Kinniburgh D.W., Hamilton T.J., Fouad K., Martin J.W.	(Reardon A.J.F.; Karathra J.; Martin J.W., jon.martin@aces.su.se) Department of Laboratory Medicine and Pathology, University of Alberta, Edmonton, AB, Canada. , (Ribbenstedt A.; Benskin J.P.; Martin J.W., jon.martin@aces.su.se) Department of Environmental Science and Analytical Chemistry (ACES), Stockholm University, Stockholm, Sweden. , (Macdonald A.M.; Kinniburgh D.W.) Alberta Centre for Toxic…	J.W. Martin, Department of Laboratory Medicine and Pathology, University of Alberta, Edmonton, AB, Canada. Email: jon.martin@aces.su.se	NA	2019-08-26	2019-09-20	Chemical Research in Toxicology (2019) 32:8 (1656-1669). Date of Publication: 19 Aug 2019	Chemical Research in Toxicology	2019	32	8	1656	1669	2019-08-19	Article	NA	NA	NA	NA	1520-5010 (electronic),0893-228X	NA	American Chemical Society, service@acs.org	Methylmercury (MeHg) and perfluorooctanesulfonate (PFOS) are major contaminants of human blood that are both common in dietary fish, thereby raising questions about their combined impact on human development. Here, pregnant Sprague-Dawley rats ingested a daily dose, from gestational day 1 through to weaning, of either 1 mg/kg bw PFOS (PFOS-only), 1 mg/kg MeHg (MeHg-only), a mixture of 0.1 mg/kg P…	NA	NA	methylmercury (drug toxicity), perfluorooctanesulfonic acid (drug toxicity)	NA	brain region, metabolomics, nerve cell differentiation, neurotoxicology, prenatal exposure	animal experiment, animal tissue, anxiety, article, body weight gain, cognition, comparative study, controlled study, elevated plus maze test, female, high performance liquid chromatography, male, memory, nonhuman, novel object recognition test, open field behavior, radial arm maze test, rat, reproductive success, rotarod test, Sprague Dawley rat, weaning	NA	NA	NA	NA
n124	nPM124	34040006	Prenatal exposures to mixtures of endocrine disrupting chemicals and children's weight trajectory up to age 5.5 in the SELMA study	Svensson K, Tanner E, Gennings C, Lindh C, Kiviranta H, WikstrÃ¶m S, Bornehag CG.	Sci Rep. 2021 May 26;11(1):11036. doi: 10.1038/s41598-021-89846-5.	Svensson K	Sci Rep	2021	2021-05-27	PMC8155069	NA	10.1038/s41598-021-89846-5	TRUE	nEm130	Prenatal exposures to mixtures of endocrine disrupting chemicals and children's weight trajectory up to age 5.5 in the SELMA study	NA	Svensson K., Tanner E., Gennings C., Lindh C., Kiviranta H., WikstrÃ¶m S., Bornehag C.-G.	(Svensson K.; Bornehag C.-G., carl-gustaf.bornehag@kau.se) Department of Health Sciences, Karlstad University, Universitetsgatan 2, Karlstad, Sweden. , (Tanner E.; Gennings C.; Bornehag C.-G., carl-gustaf.bornehag@kau.se) Department of Environmental Medicine and Public Health, Icahn School of Medicine at Mount Sinai, NY, NY, United States. , (Lindh C.) Division of Occupational and Environmental M…	NA	NA	2021-06-07	2021-12-21	Scientific reports (2021) 11:1 (11036). Date of Publication: 26 May 2021	Scientific reports	2021	11	1	11036	NA	2021-05-26	Article	NA	NA	NA	NA	2045-2322 (electronic)	NA	NLM (Medline)	Exposure to endocrine disrupting chemicals (EDCs) may impact early growth, although information is limited on exposure to combination of multiple EDCs. We aimed to evaluate the effect of prenatal exposure to EDC mixtures on birthweight z-scores and childhood weight trajectories. Twenty-six proven and suspected EDCs, were analyzed in prenatal urine and blood samples from 1118 mothers participating…	NA	NA	endocrine disruptor	NA	prenatal exposure	birth weight, child, female, human, infant, male, maternal exposure, pollutant, pregnancy, preschool child	NA	NA	NA	NA
n125	nPM125	20037150	Effect of increased body mass index and anaesthetic duration on recovery of protective airway reflexes after sevoflurane vs desflurane	McKay RE, Malhotra A, Cakmakkaya OS, Hall KT, McKay WR, Apfel CC.	Br J Anaesth. 2010 Feb;104(2):175-82. doi: 10.1093/bja/aep374. Epub 2009 Dec 26.	McKay RE	Br J Anaesth	2010	2009-12-29	NA	NA	10.1093/bja/aep374	FALSE	NA	NA	NA	NA	NA	NA	NA	NA	NA	NA	NA	NA	NA	NA	NA	NA	NA	NA	NA	NA	NA	NA	NA	NA	NA	NA	NA	NA	NA	NA	NA	NA	NA	NA	NA	NA
n126	nPM126	34749968	Association of maternal exposure to perfluoroalkyl and polyfluroalkyl substances with infant growth from birth to 12Â months: A prospective cohort study	Zhang Y, Pan C, Ren Y, Wang Z, Luo J, Ding G, Vinturache A, Wang X, Shi R, Ouyang F, Zhang J, Li J, Gao Y, Tian Y; Shanghai Birth Cohort Study.	Sci Total Environ. 2022 Feb 1;806(Pt 3):151303. doi: 10.1016/j.scitotenv.2021.151303. Epub 2021 Oct 29.	Zhang Y	Sci Total Environ	2022	2021-11-09	NA	NA	10.1016/j.scitotenv.2021.151303	TRUE	nEm056	Association of maternal exposure to perfluoroalkyl and polyfluroalkyl substances with infant growth from birth to 12 months: A prospective cohort study	NA	Zhang Y., Pan C., Ren Y., Wang Z., Luo J., Ding G., Vinturache A., Wang X., Shi R., Ouyang F., Zhang J., Li J., Gao Y., Tian Y.	(Zhang Y.; Pan C.; Ren Y.; Wang Z.; Shi R.; Gao Y., gaoyu_ciel@sjtu.edu.cn; Tian Y., tianmiejp@sjtu.edu.cn) Department of Environmental Health, School of Public Health, Shanghai Jiao Tong University School of Medicine, Shanghai, China. , (Luo J.) Department of Environmental Health Sciences, Yale School of Public Health, New Haven, CT, United States. , (Ding G.) Department of Respiratory Medicine,…	Y. Gao, Department of Environmental Health, School of Public Health, Shanghai Jiao Tong University School of Medicine, 280 South Chongqing Road, Shanghai, China. Email: gaoyu_ciel@sjtu.edu.cn""Y. Tian, Department of Environmental Health, School of Public Health, Shanghai Jiao Tong University School of Medicine, 280 South Chongqing Road, 200025 Shanghai, China, MOE-Shanghai Key Laboratory of Child…	NA	2021-11-23	2022-04-05	Science of the Total Environment (2022) 806 Article Number: 151303. Date of Publication: 1 Feb 2022	Science of the Total Environment	2022	806	NA	NA	NA	2022-02-01	Article	NA	NA	NA	NA	1879-1026 (electronic),0048-9697	NA	Elsevier B.V.	Background: Although maternal perfluoroalkyl and polyfluroalkyl substances (PFASs) were associated with adverse birth outcomes, much less is known about their impact on infant growth during early infancy. Objectives: We investigated the association between maternal PFASs exposure and infant growth during the first 12 months of life. Methods: Participating 2395 pregnancies were recruited from Shan…	NA	China,Growth,Infancy,Perfluoroalkyl and polyfluroalkyl substances,Pregnancy,Shanghai Birth Cohort	alkyl group, perfluoroalkyl substance, polyfluroalkyl substance	heptanoic acid derivative, perfluorobutane sulfonate, perfluorododecanoic acid, perfluoroheptanoic acid, sulfonic acid derivative, unclassified drug	child growth, maternal exposure	adult, age, article, body height, body mass, body weight, cohort analysis, concentration (parameter), controlled study, educational status, female, head circumference, human, male, pregnancy, prospective study, quantitative analysis, sex	NA	NA	NA	NA
n127	nPM127	30308470	Longitudinal trends of per- and polyfluoroalkyl substances in children's serum	Koponen J, Winkens K, Airaksinen R, Berger U, Vestergren R, Cousins IT, Karvonen AM, Pekkanen J, Kiviranta H.	Environ Int. 2018 Dec;121(Pt 1):591-599. doi: 10.1016/j.envint.2018.09.006. Epub 2018 Oct 8.	Koponen J	Environ Int	2018	2018-10-12	NA	NA	10.1016/j.envint.2018.09.006	TRUE	nEm314	Longitudinal trends of per- and polyfluoroalkyl substances in children's serum	NA	Koponen J., Winkens K., Airaksinen R., Berger U., Vestergren R., Cousins I.T., Karvonen A.M., Pekkanen J., Kiviranta H.	(Koponen J., jani.koponen@thl.fi; Airaksinen R.; Karvonen A.M.; Pekkanen J.; Kiviranta H.) Department of Health Security, National Institute for Health and Welfare (THL), Kuopio, Finland. , (Winkens K., kerstin.winkens@aces.su.se; Cousins I.T.) Department of Environmental Science and Analytical Chemistry (ACES), Stockholm University, Stockholm, Sweden. , (Berger U.) Department Analytical Chemistr…	J. Koponen, Department of Health Security, National Institute for Health and Welfare (THL), Neulaniementie 4, Kuopio, Finland. Email: jani.koponen@thl.fi	NA	2018-11-07	2020-12-11	Environment International (2018) 121 (591-599). Date of Publication: 1 Dec 2018	Environment International	2018	121	NA	591	599	2018-12-01	Article	NA	NA	NA	NA	1873-6750 (electronic),0160-4120	NA	Elsevier Ltd	Studies suggest negative health impacts from early life exposure to per- and polyfluoroalkyl substances (PFASs). However, information on longitudinal exposure to PFASs during childhood is scarce for background-exposed individuals. This study sought to fill this gap by investigating children's longitudinal exposure trends through measurement of PFAS serum concentrations and calculation of body bur…	NA	Biomonitoring,Body burden,Child,Growth dilution,Perfluoroalkyl,PFAA,PFAS,Serum	perfluorohexanesulfonic acid, perfluorononanoic acid, perfluorooctanesulfonic acid, perfluorooctanoic acid	NA	blood level	adolescence, ambient air, article, body burden, body mass, breast feeding, child, child growth, childhood, concentration (parameter), dust exposure, environmental exposure, female, Finland, groups by age, human, infant, male, newborn, preschool child, school child, sex difference, trend study	NA	NA	NA	NA
n128	nPM128	33422710	Prenatal exposure to a wide range of environmental chemicals and child behaviour between 3 and 7Â years of age - An exposome-based approach in 5 European cohorts	Jedynak P, Maitre L, Guxens M, GÃ¼tzkow KB, Julvez J, LÃ³pez-Vicente M, Sunyer J, Casas M, Chatzi L, GraÅ¾uleviÄienÄ— R, Kampouri M, McEachan R, Mon-Williams M, Tamayo I, Thomsen C, Urquiza J, Vafeiadi M, Wright J, BasagaÃ±a X, Vrijheid M, Philippat C.	Sci Total Environ. 2021 Apr 1;763:144115. doi: 10.1016/j.scitotenv.2020.144115. Epub 2020 Dec 15.	Jedynak P	Sci Total Environ	2021	2021-01-10	PMC7840589	NA	10.1016/j.scitotenv.2020.144115	TRUE	nEm138	Prenatal exposure to a wide range of environmental chemicals and child behaviour between 3 and 7 years of age â€“ An exposome-based approach in 5 European cohorts	NA	Jedynak P., Maitre L., Guxens M., GÃ¼tzkow K.B., Julvez J., LÃ³pez-Vicente M., Sunyer J., Casas M., Chatzi L., GraÅ¾uleviÄienÄ— R., Kampouri M., McEachan R., Mon-Williams M., Tamayo I., Thomsen C., Urquiza J., Vafeiadi M., Wright J., BasagaÃ±a X., Vrijheid M., Philippat C.	(Jedynak P., paulina.jedynak@univ-grenoble-alpes.fr; Philippat C.) University Grenoble Alpes, Inserm, CNRS, Team of Environmental Epidemiology applied to Reproduction and Respiratory Health, Institute for Advanced Biosciences (IAB), Grenoble, France. , (Maitre L.; Guxens M.; Julvez J.; LÃ³pez-Vicente M.; Sunyer J.; Casas M.; Tamayo I.; Urquiza J.; BasagaÃ±a X.; Vrijheid M.) ISGlobal, Barcelona, S…	P. Jedynak, University Grenoble Alpes, Inserm, CNRS, Team of Environmental Epidemiology applied to Reproduction and Respiratory Health, Institute for Advanced Biosciences (IAB), Grenoble, France. Email: paulina.jedynak@univ-grenoble-alpes.fr	NA	2021-01-12	2021-05-10	Science of the Total Environment (2021) 763 Article Number: 144115. Date of Publication: 1 Apr 2021	Science of the Total Environment	2021	763	NA	NA	NA	2021-04-01	Article	NA	NA	NA	NA	1879-1026 (electronic),0048-9697	NA	Elsevier B.V.	Background: Studies looking at associations between environmental chemicals and child behaviour usually consider only one exposure or family of exposures. Objective: This study explores associations between prenatal exposure to a wide range of environmental chemicals and child behaviour. Methods: We studied 708 mother-child pairs from five European cohorts recruited in 2003â€“2009. We assessed 47…	NA	Birth cohort,Child behaviour,Internal exposome,Prenatal exposure,Strengths and Difficulties Questionnaire	environmental chemical (special situation for pharmacovigilance)	4,4' isopropylidenediphenol (special situation for pharmacovigilance), biological marker, copper, diethyl thiophosphate, mono n butylphthalate (special situation for pharmacovigilance), organochlorine derivative, perfluorooctanesulfonic acid, perfluoroundecanoic acid, phosphorothioic acid derivative, phthalic acid derivative (special situation for pharmacovigilance), unclassified drug	child behavior, prenatal exposure, problem behavior (etiology)	adult, article, body weight gain, child, cohort analysis, concentration (parameter), controlled study, Europe, exposome, family study, female, high risk population, human, incidence, low risk population, major clinical study, male, maternal blood, mother child relation, perinatal period, pregnant woman, priority journal, risk assessment, school child, scoring system, strengths and difficulties qu…	NA	NA	NA	NA
n129	nPM129	28325044	Predictors of Per- and Polyfluoroalkyl Substance (PFAS) Plasma Concentrations in 6-10 Year Old American Children	Harris MH, Rifas-Shiman SL, Calafat AM, Ye X, Mora AM, Webster TF, Oken E, Sagiv SK.	Environ Sci Technol. 2017 May 2;51(9):5193-5204. doi: 10.1021/acs.est.6b05811. Epub 2017 Apr 11.	Harris MH	Environ Sci Technol	2017	2017-03-23	PMC5576362	NIHMS898277	10.1021/acs.est.6b05811	TRUE	nEm392	Predictors of Per- and Polyfluoroalkyl Substance (PFAS) Plasma Concentrations in 6-10 Year Old American Children	NA	Harris M.H., Rifas-Shiman S.L., Calafat A.M., Ye X., Mora A.M., Webster T.F., Oken E., Sagiv S.K.	(Harris M.H., mariaharris@berkeley.edu; Sagiv S.K.) Center for Environmental Research and Children's Health, University of California, Berkeley School of Public Health, Berkeley, CA, United States. , (Harris M.H., mariaharris@berkeley.edu; Sagiv S.K.) Division of Epidemiology, University of California, Berkeley School of Public Health, Berkeley, CA, United States. , (Rifas-Shiman S.L.; Oken E.) O…	M.H. Harris, Center for Environmental Research and Children's Health, University of California, Berkeley School of Public Health, Berkeley, CA, United States. Email: mariaharris@berkeley.edu	NA	2017-06-20	2017-06-28	Environmental Science and Technology (2017) 51:9 (5193-5204). Date of Publication: 2 May 2017	Environmental Science and Technology	2017	51	9	5193	5204	2017-05-02	Article	NA	NA	NA	NA	1520-5851 (electronic),0013-936X	NA	American Chemical Society, service@acs.org	Certain per- and polyfluoroalkyl substances (PFASs) are suspected developmental toxicants, but data on PFAS concentrations and exposure routes in children are limited. We measured plasma PFASs in children aged 6-10 years from the Boston-area Project Viva prebirth cohort, and used multivariable linear regression to estimate associations with sociodemographic, behavioral, and health-related factors…	NA	NA	2 (n methyl perfluorooctane sulfonamido)acetate, acetic acid, perfluorohexanesulfonic acid, perfluorooctanesulfonic acid, perfluorooctanoic acid	unclassified drug	blood level, plasma	adult, article, Black person, Caucasian, child, educational status, female, health survey, human, income, male, neighborhood, obesity, pregnancy, prenatal exposure	NA	NA	NA	NA
n130	nPM130	35349911	The socioeconomic landscape of the exposome during pregnancy	Sum KK, Tint MT, Aguilera R, Dickens BSL, Choo S, Ang LT, Phua D, Law EC, Ng S, Tan KM, Benmarhnia T, Karnani N, Eriksson JG, Chong YS, Yap F, Tan KH, Lee YS, Chan SY, Chong MFF, Huang J.	Environ Int. 2022 May;163:107205. doi: 10.1016/j.envint.2022.107205. Epub 2022 Mar 26.	Sum KK	Environ Int	2022	2022-03-29	NA	NA	10.1016/j.envint.2022.107205	TRUE	nEm047	The socioeconomic landscape of the exposome during pregnancy	NA	Sum K.K., Tint M.T., Aguilera R., Dickens B.S.L., Choo S., Ang L.T., Phua D., Law E.C., Ng S., Tan K.M.-L., Benmarhnia T., Karnani N., Eriksson J.G., Chong Y.-S., Yap F., Tan K.H., Lee Y.S., Chan S.-Y., Chong M.F.F., Huang J.	(Sum K.K., sum_ka_kei@sics.a-star.edu.sg; Tint M.T.; Choo S.; Ang L.T.; Phua D.; Law E.C.; Ng S.; Tan K.M.-L.; Karnani N.; Eriksson J.G.; Chong Y.-S.; Lee Y.S.; Chan S.-Y.; Chong M.F.F.; Huang J.) Singapore Institute for Clinical Science, Agency for Science, Technology, and Research, Singapore, Singapore. , (Tint M.T.; Ng S.; Eriksson J.G.; Chong Y.-S.; Chan S.-Y.) Department of Obstetrics and Gy…	K.K. Sum, Brenner Centre for Molecular Medicine, 30 Medical Drive, Singapore, Singapore. Email: sum_ka_kei@sics.a-star.edu.sg	NA	2022-04-05	2022-04-08	Environment International (2022) 163 Article Number: 107205. Date of Publication: 1 May 2022	Environment International	2022	163	NA	NA	NA	2022-05-01	Article	NA	NA	NA	NA	1873-6750 (electronic),0160-4120	NA	Elsevier Ltd	Background: While socioeconomic position (SEP) is consistently related to pregnancy and birth outcome disparities, relevant biological mechanisms are manifold, thus necessitating more comprehensive characterization of SEP-exposome associations during pregnancy. Objectives: We implemented an exposomic approach to systematically characterize the socioeconomic landscape of prenatal exposures in a se…	NA	Biomarkers,Exposome,Inequality,Pregnancy,Socioeconomic position	NA	biological marker (endogenous compound), copper, fluorine derivative, folic acid, hormone, neopterin (endogenous compound), omega 3 fatty acid, perfluoro compound, perfluoroalkyl substance, polyfluoroalkyl substance, somatomedin B (endogenous compound), trace element, unclassified drug	exposome, pregnancy, socioeconomics	adult, air pollutant, anthropometry, article, cohort analysis, correspondence analysis, educational status, ethnicity, female, glucose blood level, highest income group, household, household income, housing, human, longitudinal study, male, maternal education, maternal exposure, maternal nutrition, mother, nonlinear system, obesity, paternal education, place of birth, PM2.5 exposure, population r…	NA	NA	NA	NA
n131	nPM131	29722443	Biomonitoring of bisphenol A, triclosan and perfluorooctanoic acid in hair samples of children and adults	Karzi V, Tzatzarakis MN, Vakonaki E, Alegakis T, Katsikantami I, Sifakis S, Rizos A, Tsatsakis AM.	J Appl Toxicol. 2018 Aug;38(8):1144-1152. doi: 10.1002/jat.3627. Epub 2018 May 3.	Karzi V	J Appl Toxicol	2018	2018-05-04	NA	NA	10.1002/jat.3627	TRUE	nEm332	Biomonitoring of bisphenol A, triclosan and perfluorooctanoic acid in hair samples of children and adults	NA	Karzi V., Tzatzarakis M.N., Vakonaki E., Alegakis T., Katsikantami I., Sifakis S., Rizos A., Tsatsakis A.M.	(Karzi V.; Tzatzarakis M.N.; Vakonaki E.; Alegakis T.; Katsikantami I.; Tsatsakis A.M., tsatsaka@uoc.gr) Laboratory of Toxicology Science and Research, Medical School, University of Crete, Heraklion, Greece. , (Karzi V.; Katsikantami I.; Rizos A.) Department of Chemistry, University of Crete and Foundation for Research and Technology â€“ Hellas (FORTH-IESL), Heraklion, Crete, Greece. , (Sifakis S…	A.M. Tsatsakis, Laboratory of Toxicology Science and Research, Medical School, University of Crete, Heraklion, Greece. Email: tsatsaka@uoc.gr	NA	2018-05-09	2018-06-25	Journal of Applied Toxicology (2018) 38:8 (1144-1152). Date of Publication: 1 Aug 2018	Journal of Applied Toxicology	2018	38	8	1144	1152	2018-08-01	Article	NA	NA	NA	NA	1099-1263 (electronic),0260-437X	NA	John Wiley and Sons Ltd, Southern Gate, Chichester, West Sussex, United Kingdom. vgorayska@wiley.com	Bisphenol A (BPA), triclosan (TCS) and perfluorooctanoic acid (PFOA) are endocrine disruptors linked with negative health effects such as developmental, reproductive and cardiovascular toxicity. The aim of this study was to determine simultaneously the concentration of BPA, TCS and PFOA in hair from children and adults and examine possible associations between biomonitoring data and age, gender, …	NA	bisphenol A,hair,LC-atmospheric pressure chemical ionization-MS,perfluorooctanoic acid,triclosan	4,4' isopropylidenediphenol (drug toxicity), perfluorooctanoic acid (drug toxicity), triclosan (drug toxicity)	NA	biological monitoring, body mass, dietary intake	adult, analytical parameters, article, child, controlled study, female, food intake, groups by age, hair analysis, human, limit of quantitation, liquid chromatography-mass spectrometry, major clinical study, male, priority journal, quality control, skin absorption	NA	NA	NA	NA
n132	nPM132	33941842	Trajectories and determinants of weight gain in two cohorts of young adult women born 16 years apart	Brown WJ, Flores TR, Keating SE, Mielke GI.	Int J Obes (Lond). 2021 Jul;45(7):1553-1564. doi: 10.1038/s41366-021-00819-0. Epub 2021 May 3.	Brown WJ	Int J Obes (Lond)	2021	2021-05-04	PMC8090508	NA	10.1038/s41366-021-00819-0	TRUE	nEm117	Trajectories and determinants of weight gain in two cohorts of young adult women born 16 years apart	NA	Brown W.J., Flores T.R., Keating S.E., Mielke G.I.	(Brown W.J., wbrown@uq.edu.au; Keating S.E.; Mielke G.I.) Centre for Research on Exercise, Physical Activity and Health, School of Human Movement and Nutrition Sciences, The University of Queensland, Brisbane, QLD, Australia. , (Flores T.R.) Postgraduate Program in Epidemiology, Federal University of Pelotas, Pelotas, Brazil.	W.J. Brown, Centre for Research on Exercise, Physical Activity and Health, School of Human Movement and Nutrition Sciences, The University of Queensland, Brisbane, QLD, Australia. Email: wbrown@uq.edu.au	NA	2021-05-11	2021-05-11	International Journal of Obesity (2021) 45:7 (1553-1564). Date of Publication: 1 Jul 2021	International Journal of Obesity	2021	45	7	1553	1564	2021-07-01	Article	NA	NA	NA	NA	1476-5497 (electronic),0307-0565	NA	Springer Nature	Background: The aims were to compare: (1) baseline weights and weight gain trajectories; (2) sociodemographic, behavioural and health characteristics driving weight gain; and (3) estimated average weight in 20 yearsâ€™ time, in two cohorts of young women. Methods: Data were from 16066 participants in two population-based cohorts of young adult women, born in 1973â€“78 (â€œGenXâ€) and 1989â€“95 (…	NA	NA	NA	NA	body weight gain, obesity (epidemiology), weight trajectory (body weight)	adolescent, adult, article, Australia, body mass, cohort analysis, current smoker, depression, ex-smoker, female, human, major clinical study, physical activity, physiological stress, prevalence, smoking, tertiary education, young adult	NA	NA	NA	NA
n133	nPM133	31389053	Effect of gestational exposure to perfluorononanoic acid on neonatal mice testes	Singh S, Singh SK.	J Appl Toxicol. 2019 Dec;39(12):1663-1671. doi: 10.1002/jat.3883. Epub 2019 Aug 6.	Singh S	J Appl Toxicol	2019	2019-08-08	NA	NA	10.1002/jat.3883	TRUE	nEm244	Effect of gestational exposure to perfluorononanoic acid on neonatal mice testes	NA	Singh S., Singh S.K.	(Singh S.; Singh S.K., shioks@rediffmail.com) Department of Zoology, Institute of Science, Banaras Hindu University, Varanasi, India.	S.K. Singh, Department of Zoology, Institute of Science, Banaras Hindu University, Varanasi, India. Email: shioks@rediffmail.com	NA	2019-08-21	2019-11-28	Journal of Applied Toxicology (2019) 39:12 (1663-1671). Date of Publication: 1 Dec 2019	Journal of Applied Toxicology	2019	39	12	1663	1671	2019-12-01	Article	NA	NA	NA	NA	1099-1263 (electronic),0260-437X	NA	John Wiley and Sons Ltd, Southern Gate, Chichester, West Sussex, United Kingdom. vgorayska@wiley.com	Perfluoroalkyl acids (PFAAs) are widely used in commercial products and are found in many goods of daily use. Perfluorononanoic acid (PFNA) is one of the PFAAs that possesses endocrine disrupting properties and we have recently shown that PFNA affects testicular functions in Parkes mice. Exposure to environmental endocrine disruptors during fetal life is believed to affect gonadal development and…	NA	gestational exposure,gonad development,neonatal testis,perfluorononanoic acid,steroidogenesis	perfluorononanoic acid (drug toxicity)	3(or 17)beta hydroxysteroid dehydrogenase (endogenous compound), cholesterol monooxygenase (side chain cleaving) (endogenous compound), hydroxycorticosteroid (endogenous compound), testosterone 17beta dehydrogenase (endogenous compound)	gonad development, prenatal exposure, progeny	animal experiment, animal model, animal tissue, article, body weight, cell proliferation, controlled study, female, gestational age, histopathology, immunoblotting, immunohistochemistry, male, mouse, nephroblastoma, newborn, nonhuman, priority journal, protein expression, reproductive toxicity, reverse transcription polymerase chain reaction, testis function, testosterone synthesis	NA	NA	NA	NA
n134	nPM134	36277702	Association between perfluoroalkyl substances concentration and bone mineral density in the US adolescents aged 12-19 years in NHANES 2005-2010	Xiong X, Chen B, Wang Z, Ma L, Li S, Gao Y.	Front Endocrinol (Lausanne). 2022 Oct 5;13:980608. doi: 10.3389/fendo.2022.980608. eCollection 2022.	Xiong X	Front Endocrinol (Lausanne)	2022	2022-10-24	PMC9581310	NA	10.3389/fendo.2022.980608	TRUE	nEm020	Association between perfluoroalkyl substances concentration and bone mineral density in the US adolescents aged 12-19 years in NHANES 2005-2010	NA	Xiong X., Chen B., Wang Z., Ma L., Li S., Gao Y.	(Xiong X.; Chen B.; Wang Z.; Ma L.; Li S.) The First Clinical School of Guangzhou University of Chinese Medicine, Guangzhou, China. , (Gao Y., gaoyijia99@163.com) The First Affiliated Hospital, Guangzhou University of Chinese Medicine, Guangzhou, China.	Y. Gao, The First Affiliated Hospital, Guangzhou University of Chinese Medicine, Guangzhou, China. Email: gaoyijia99@163.com	NA	2022-11-01	2022-11-28	Frontiers in Endocrinology (2022) 13 Article Number: 980608. Date of Publication: 5 Oct 2022	Frontiers in Endocrinology	2022	13	NA	NA	NA	2022-10-05	Article	NA	NA	NA	NA	1664-2392 (electronic)	NA	Frontiers Media S.A.	Background: Reports on the association of perfluoroalkyl substances (PFASs) exposure with adolescent bone health are scarce, and studies have primarily targeted maternal serum. Objective: We evaluated the relationship between autologous serum perfluorooctanoic acid (PFOA), perfluorooctane sulfonic acid (PFOS), perfluorohexane sulfonic acid (PFHxS) and perfluorononanoic acid (PFNA) levels and bone…	NA	bone mineral density,perfluoroalkyl substances,perfluorohexane sulfonic acid,perfluorononanoic acid,perfluorooctane sulfonic acid,perfluorooctanoic acid	perfluorohexanesulfonic acid, perfluorononanoic acid, perfluorooctanesulfonic acid, perfluorooctanoic acid	NA	bone density	adolescent, adult, albumin to creatinine ratio, albuminuria, anemia, article, child, controlled study, densitometer, dual energy X ray absorptiometry, female, human, human experiment, lumbar spine, male, physical activity, school child, young adult	NA	NA	NA	NA
n135	nPM135	18063051	Neonatal exposure to perfluorooctane sulfonate (PFOS) and perfluorooctanoic acid (PFOA) causes neurobehavioural defects in adult mice	Johansson N, Fredriksson A, Eriksson P.	Neurotoxicology. 2008 Jan;29(1):160-9. doi: 10.1016/j.neuro.2007.10.008. Epub 2007 Nov 1.	Johansson N	Neurotoxicology	2008	2007-12-08	NA	NA	10.1016/j.neuro.2007.10.008	TRUE	nEm703	Neonatal exposure to perfluorooctane sulfonate (PFOS) and perfluorooctanoic acid (PFOA) causes neurobehavioural defects in adult mice	NA	Johansson N., Fredriksson A., Eriksson P.	(Johansson N.; Fredriksson A.; Eriksson P., per.eriksson@ebc.uu.se) Department of Environmental Toxicology, Uppsala University, NorbyvÃ¤gen 18 A, S-752 36 Uppsala, Sweden.	P. Eriksson, Department of Environmental Toxicology, Uppsala University, NorbyvÃ¤gen 18 A, S-752 36 Uppsala, Sweden. Email: per.eriksson@ebc.uu.se	NA	NA	2008-01-31	NeuroToxicology (2008) 29:1 (160-169). Date of Publication: January 2008	NeuroToxicology	2008	29	1	160	169	2023-01-08	Article	NA	NA	NA	NA	0161-813X	NA	Elsevier, P.O. Box 211, Amsterdam, Netherlands.	Perfluorinated compounds (PFCs) are found in applications such oil/water repellents for clothing fabrics, carpets, food packaging, lubricants, surfactants and fire extinguishers. PFCs are persistent in the environment. They have been found in humans and in wildlife. We reported earlier that persistent organic pollutants (POPs), such as DDT, PCBs and BFRs, caused developmental neurotoxic defects i…	NA	Behaviour,Developmental neurotoxicity,PFC,PFDA,PFOA,PFOS	perfluorooctanesulfonic acid (drug toxicity), perfluorooctanoic acid (drug toxicity)	nicotine	NA	animal experiment, animal tissue, article, behavior change, body weight gain, brain development, cholinergic system, cognition, controlled study, environmental exposure, female, habitual adaptation, habituation, learning, locomotion, male, maze test, memory, mouse, nerve cell differentiation, neurotoxicity, newborn period, nonhuman, priority journal, rearing	NA	NA	NA	NA
n136	nPM136	29987291	Inter-individual, inter-city, and temporal trends of per- and polyfluoroalkyl substances in human milk from Swedish mothers between 1972 and 2016	Nyberg E , Awad R , Bignert A , Ek C , Sallsten G , Benskin JP .	Environ Sci Process Impacts. 2018 Aug 16;20(8):1136-1147. doi: 10.1039/c8em00174j.	Nyberg E	Environ Sci Process Impacts	2018	2018-07-11	NA	NA	10.1039/c8em00174j	TRUE	nEm333	Inter-individual, inter-city, and temporal trends of per- and polyfluoroalkyl substances in human milk from Swedish mothers between 1972 and 2016	NA	Nyberg E., Awad R., Bignert A., Ek C., Sallsten G., Benskin J.P.	(Nyberg E., Elisabeth.Nyberg@nrm.se; Bignert A.; Ek C.) Department of Environmental Research and Monitoring, Swedish Museum of Natural History, Stockholm, Sweden. , (Awad R.; Benskin J.P., Jon.Benskin@aces.su.se) Department of Environmental Science and Analytical Chemistry (ACES), Stockholm University, Stockholm, Sweden. , (Sallsten G.) Department of Occupational and Environmental Medicine, Sahlg…	E. Nyberg, Department of Environmental Research and Monitoring, Swedish Museum of Natural History, Stockholm, Sweden. Email: Elisabeth.Nyberg@nrm.se	NA	2018-08-30	2018-10-26	Environmental Science: Processes and Impacts (2018) 20:8 (1136-1147). Date of Publication: 1 Aug 2018	Environmental Science: Processes and Impacts	2018	20	8	1136	1147	2018-08-01	Article	NA	NA	NA	NA	2050-7895 (electronic),2050-7887	NA	Royal Society of Chemistry	Inter-individual, inter-city, and temporal trends of 19 per- and polyfluoroalkyl substances (PFASs) were investigated in human milk collected in Stockholm (1972-2016) and Gothenburg (2007-2015), Sweden. The concentrations of perfluorohexane sulfonate (PFHxS), perfluorononanoate (PFNA), perfluorodecanoate (PFDA), perfluoroundecanoate (PFUnDA), and perfluorotridecanoate (PFTrDA) in human milk from …	NA	NA	alkane derivative, fluorine derivative	NA	breast milk, city	accuracy, article, blood sampling, female, health hazard, human, limit of detection, priority journal, quality control, Sweden	NA	NA	NA	NA
n137	nPM137	17093205	Perfluorooctanoic acid and perfluorononanoic acid in fetal and neonatal mice following in utero exposure to 8-2 fluorotelomer alcohol	Henderson WM, Smith MA.	Toxicol Sci. 2007 Feb;95(2):452-61. doi: 10.1093/toxsci/kfl162. Epub 2006 Nov 8.	Henderson WM	Toxicol Sci	2007	2006-11-10	NA	NA	10.1093/toxsci/kfl162	TRUE	nEm718	Perfluorooctanoic acid and perfluorononanoic acid in fetal and neonatal mice following in utero exposure to 8-2 fluorotelomer alcohol	NA	Henderson W.M., Smith M.A.	(Henderson W.M., Henderson.matt@epa.gov; Smith M.A.) Interdisciplinary Toxicology Program, College of Public Health, University of Georgia, Athens, GA 30602, United States. , (Henderson W.M., Henderson.matt@epa.gov; Smith M.A.) Center for Food Safety, College of Agricultural and Environmental Sciences, University of Georgia, Athens, GA 30602, United States. , (Henderson W.M., Henderson.matt@epa.g…	W.M. Henderson, National Exposure Research Laboratory, Office of Research and Development, U.S. Environmental Protection Agency, 960 College Station Road, Athens, GA 30602, United States. Email: Henderson.matt@epa.gov	NA	NA	2007-02-23	Toxicological Sciences (2007) 95:2 (452-461). Date of Publication: February 2007	Toxicological Sciences	2007	95	2	452	461	2023-02-07	Article	NA	NA	NA	NA	1096-6080,1096-0929 (electronic)	NA	Oxford University Press, 2001 Evans Road, Cary, United States.	8-2 Fluorotelomer alcohol (FTOH) and its metabolites, perfluorooctanoic acid (PFOA) and perfluorononanoic acid (PFNA), are developmental toxicants but metabolism and distribution during pregnancy are not known. To examine this, timed-pregnant mice received a single gavage dose (30 mg 8-2 FTOH/kg body weight) on gestational day (GD) 8. Maternal and neonatal serum and liver as well as fetal and neo…	NA	Fetal and neonatal distribution,Fluorotelomer alcohols (FTOH),PFNA,PFOA	8 2 fluorotelomer alcohol, alcohol, perfluoro compound, perfluorononanoic acid, perfluorooctanoic acid	unclassified drug	prenatal exposure	animal tissue, article, blood level, controlled study, female, fetomaternal transfusion, fetus, fetus development, gas chromatography, lactation, liver level, mass spectrometry, maternal blood, mouse, newborn, nonhuman, perinatal period, teratogenicity	NA	NA	NA	NA
n138	nPM138	32315828	Perfluoroalkyl substances and anthropomorphic measures in children (ages 3-11 years), NHANES 2013-2014	Scinicariello F, Buser MC, Abadin HG, Attanasio R.	Environ Res. 2020 Jul;186:109518. doi: 10.1016/j.envres.2020.109518. Epub 2020 Apr 15.	Scinicariello F	Environ Res	2020	2020-04-22	PMC8132309	NIHMS1697994	10.1016/j.envres.2020.109518	TRUE	nEm203	Perfluoroalkyl substances and anthropomorphic measures in children (ages 3â€“11 years), NHANES 2013â€“2014.	NA	Scinicariello F., Buser M.C., Abadin H.G., Attanasio R.	(Scinicariello F., fes6@cdc.gov; Buser M.C.; Abadin H.G.) Division of Toxicology and Human Health Sciences, Agency for Toxic Substances and Disease Registry (ATSDR), Atlanta, GA, United States. , (Attanasio R.) Department of Biology, Georgia State University, Atlanta, GA, United States.	F. Scinicariello, MPH Centers for Disease Control and Prevention, Agency for Toxic Substances and Disease Registry, 4770 Buford Hwy, MS S102-1, Atlanta, United States. Email: fes6@cdc.gov	NA	2020-07-08	2020-07-09	Environmental Research (2020) 186 Article Number: 109518. Date of Publication: 1 Jul 2020	Environmental Research	2020	186	NA	NA	NA	2020-07-01	Article	NA	NA	NA	NA	1096-0953 (electronic),0013-9351	NA	Academic Press Inc., apjcs@harcourt.com	Background: Perfluoroalkyl acids (PFAAs) are man-made compounds that are persistent in the environment and highly bioaccumulative in the body. Humans are exposed to a mixture of these substances, and the effects of these mixtures may be different than the effects noted for individual compounds. Prenatal exposure to PFAAs has been associated with decreased birth weight. The objective of the presen…	NA	Children,Height-for-age,NHANES,Perfluoroalkyl acids,Perfluoroalkyl and polyfluoroalkyl substances,Weight-for-age	perfluoroalkyl substance, toxic substance	unclassified drug	child growth, health survey	article, birth weight, body mass, child, controlled study, female, human, major clinical study, male, multivariate logistic regression analysis, physical examination, prenatal exposure, priority journal, reversed phase high performance liquid chromatography, risk assessment, school child, sex difference, social status	NA	NA	NA	NA
n139	nPM139	30920876	Adverse Maternal, Fetal, and Postnatal Effects of Hexafluoropropylene Oxide Dimer Acid (GenX) from Oral Gestational Exposure in Sprague-Dawley Rats	Conley JM, Lambright CS, Evans N, Strynar MJ, McCord J, McIntyre BS, Travlos GS, Cardon MC, Medlock-Kakaley E, Hartig PC, Wilson VS, Gray LE Jr.	Environ Health Perspect. 2019 Mar;127(3):37008. doi: 10.1289/EHP4372.	Conley JM	Environ Health Perspect	2019	2019-03-29	PMC6768323	NA	10.1289/ehp4372	TRUE	nEm297	Adverse Maternal, Fetal, and Postnatal Effects of Hexafluoropropylene Oxide Dimer Acid (GenX) from Oral Gestational Exposure in Sprague-Dawley Rats	NA	Conley J.M., Lambright C.S., Evans N., Strynar M.J., McCord J., McIntyre B.S., Travlos G.S., Cardon M.C., Medlock-Kakaley E., Hartig P.C., Wilson V.S., Gray L.E.	(Conley J.M.; Lambright C.S.; Evans N.; Cardon M.C.; Medlock-Kakaley E.; Hartig P.C.; Wilson V.S.; Gray L.E.) Toxicity Assessment Division, National Health and Environmental Effects Research Laboratory, Office of Research and Development (ORD), U.S. Environmental Protection Agency (U.S. EPA), Research Triangle Park, NC, United States. , (Strynar M.J.; McCord J.) Exposure Methods and Measurements …	NA	NA	2019-04-16	2019-07-18	Environmental health perspectives (2019) 127:3 (37008). Date of Publication: 1 Mar 2019	Environmental health perspectives	2019	127	3	37008	NA	2019-03-01	Article	NA	NA	NA	NA	1552-9924 (electronic)	NA	NLM (Medline)	BACKGROUND: Hexafluoropropylene oxide dimer acid [(HFPO-DA), GenX] is a member of the per- and polyfluoroalkyl substances (PFAS) chemical class, and elevated levels of HFPO-DA have been detected in surface water, air, and treated drinking water in the United States and Europe. OBJECTIVES: We aimed to characterize the potential maternal and postnatal toxicities of oral HFPO-DA in rats during sexua…	NA	NA	NA	fluorocarbon (adverse drug reaction)	NA	animal, chemically induced, drug effect, female, fetus, maternal exposure, pathology, pathophysiology, pregnancy, prenatal exposure, rat, sex differentiation, soil pollutant, Sprague Dawley rat, water pollutant	NA	NA	NA	NA
n140	nPM140	24742729	Early life perfluorooctanoic acid (PFOA) exposure and overweight and obesity risk in adulthood in a community with elevated exposure	Barry V, Darrow LA, Klein M, Winquist A, Steenland K.	Environ Res. 2014 Jul;132:62-9. doi: 10.1016/j.envres.2014.03.025. Epub 2014 Apr 16.	Barry V	Environ Res	2014	2014-04-19	NA	NA	10.1016/j.envres.2014.03.025	TRUE	nEm519	Early life perfluorooctanoic acid (PFOA) exposure and overweight and obesity risk in adulthood in a community with elevated exposure	NA	Barry V., Darrow L.A., Klein M., Winquist A., Steenland K.	(Barry V., vbarry@emory.edu; Darrow L.A.; Klein M.; Winquist A.; Steenland K.) Departments of Environmental Health and Epidemiology, Rollins School of Public Health, Emory University, 1518 Clifton Road, Atlanta, GA 30322, United States.	V. Barry, Departments of Environmental Health and Epidemiology, Rollins School of Public Health, Emory University, 1518 Clifton Road, Atlanta, GA 30322, United States. Email: vbarry@emory.edu	NA	2014-04-25	2014-05-02	Environmental Research (2014) 132 (62-69). Date of Publication: July 2014	Environmental Research	2014	132	NA	62	69	2023-07-14	Article	NA	NA	NA	NA	1096-0953 (electronic),0013-9351	NA	Academic Press Inc., apjcs@harcourt.com	Background: Infants and young children may be susceptible to developmental effects of perfluorooctanoic acid (PFOA) exposure. Two previous studies, one that examined a general population exposed to environmental PFOA levels and one conducted in mice exposed to experimental PFOA levels, found that early life exposure was associated with higher body mass index (BMI) in adulthood and effects may be …	NA	BMI,C8,Obesity,Perfluorooctanoic acid,PFOA	perfluorooctanoic acid	NA	adulthood, community, environmental exposure, obesity, risk factor	adult, article, body height, body mass, body weight, cohort analysis, female, health survey, history, human, major clinical study, male, physical activity, plant, priority journal, residential area, retrospective study, sensitivity analysis, underweight, United States	NA	NA	NA	NA
n141	nPM141	32565448	Exposure to endocrine-disrupting chemicals and anthropometric measures of obesity: a systematic review and meta-analysis	Ribeiro CM, Beserra BTS, Silva NG, Lima CL, Rocha PRS, Coelho MS, Neves FAR, Amato AA.	BMJ Open. 2020 Jun 21;10(6):e033509. doi: 10.1136/bmjopen-2019-033509.	Ribeiro CM	BMJ Open	2020	2020-06-23	PMC7311014	NA	10.1136/bmjopen-2019-033509	TRUE	nEm206	Exposure to endocrine-disrupting chemicals and anthropometric measures of obesity: A systematic review and meta-analysis	NA	Ribeiro C.M., Beserra B.T.S., Silva N.G., Lima C.L., Rocha P.R.S., Coelho M.S., Neves F.D.A.R., Amato A.A.	(Ribeiro C.M.; Beserra B.T.S.; Silva N.G.; Lima C.L.; Rocha P.R.S.; Coelho M.S.; Neves F.D.A.R.; Amato A.A., angelicamato@unb.br) Laboratory of Molecular Pharmacology, Department of Pharmaceutical Sciences, University of Brasilia, Brasilia, Brazil.	A.A. Amato, Laboratory of Molecular Pharmacology, Department of Pharmaceutical Sciences, University of Brasilia, Brasilia, Brazil. Email: angelicamato@unb.br	NA	2020-07-09	2020-07-14	BMJ Open (2020) 10:6 Article Number: e033509. Date of Publication: 21 Jun 2020	BMJ Open	2020	10	6	NA	NA	2020-06-21	Review	NA	NA	NA	NA	2044-6055 (electronic)	NA	BMJ Publishing Group, subscriptions@bmjgroup.com	Objective Endocrine-disrupting chemicals (EDCs) are viewed as a major potential link between the environment and obesity development. We did a systematic review and meta-analysis to examine the association between exposure to EDCs and obesity. Data sources, design and eligibility criteria PubMed, Scopus and Web of Science were searched from inception to 6 June 2018 for studies primarily addressin…	NA	abdominal obesity,endocrinology disrupting chemicals,obesity,pediatric obesity	endocrine disruptor (drug toxicity)	2,5 dichlorophenol (drug toxicity), 4 hydroxybenzoic acid ester (drug toxicity), 4,4' isopropylidenediphenol (drug toxicity), alkyl group (drug toxicity), benzoic acid (drug toxicity), fluorine derivative (drug toxicity), organochlorine derivative (drug toxicity), phthalic acid derivative (drug toxicity), polybrominated biphenyl (drug toxicity), polycyclic aromatic hydrocarbon derivative (drug to…	anthropometry, obesity	age, childhood obesity, disease association, human, review, sex difference, systematic review, waist circumference	NA	NA	NA	NA
n142	nPM142	31284113	Prenatal exposure to per- and polyfluoroalkyl substances and infant growth and adiposity: the Healthy Start Study	Starling AP, Adgate JL, Hamman RF, Kechris K, Calafat AM, Dabelea D.	Environ Int. 2019 Oct;131:104983. doi: 10.1016/j.envint.2019.104983. Epub 2019 Jul 5.	Starling AP	Environ Int	2019	2019-07-09	PMC6728170	NIHMS1534595	10.1016/j.envint.2019.104983	TRUE	nEm254	Prenatal exposure to per- and polyfluoroalkyl substances and infant growth and adiposity: the Healthy Start Study	NA	Starling A.P., Adgate J.L., Hamman R.F., Kechris K., Calafat A.M., Dabelea D.	(Starling A.P., anne.starling@ucdenver.edu; Hamman R.F.; Dabelea D.) Department of Epidemiology, Colorado School of Public Health, Aurora, CO, United States. , (Starling A.P., anne.starling@ucdenver.edu; Hamman R.F.; Dabelea D.) Lifecourse Epidemiology of Adiposity and Diabetes (LEAD) Center, University of Colorado Anschutz Medical Campus, Aurora, CO, United States. , (Adgate J.L.) Department of …	A.P. Starling, Department of Epidemiology, Colorado School of Public Health, University of Colorado Anschutz Medical Campus, 13001 E 17(th) Place, Aurora, CO, United States. Email: anne.starling@ucdenver.edu	NA	2019-07-29	2020-12-11	Environment International (2019) 131 Article Number: 104983. Date of Publication: 1 Oct 2019	Environment International	2019	131	NA	NA	NA	2019-10-01	Article	NA	NA	NA	NA	1873-6750 (electronic),0160-4120	NA	Elsevier Ltd	Background: Prenatal exposures to certain per- and polyfluoroalkyl substances (PFAS) have been linked to lower weight and adiposity at birth but greater weight and adiposity in childhood. We hypothesized that faster growth in early infancy may be associated with maternal PFAS concentrations. Methods: Among 415 mother-infant pairs in a longitudinal cohort study, we estimated associations between m…	NA	Adiposity,Infancy,Perfluoroalkyl substances,Polyfluoroalkyl substances,Pregnancy,Rapid growth,Weight-for-age,Weight-for-length	fluorinated hydrocarbon (drug toxicity), perfluoroalkyl compound (drug toxicity), polyfluoroalkyl compound (drug toxicity)	2 (n methylperfluorooctanesulfonamido) acetate (drug toxicity), perfluorohexanesulfonic acid (drug toxicity), perfluorononanoic acid (drug toxicity), perfluorooctanesulfonic acid (drug toxicity), perfluorooctanoic acid (drug toxicity), unclassified drug	child growth, obesity, prenatal exposure	age, anthropometric parameters, article, blood level, body mass, body weight, cohort analysis, controlled study, correlation analysis, fat mass, female, gender, human, infant, limit of detection, longitudinal study, male, maternal blood, mathematical model, pollutant, priority journal, progeny, regression analysis, scoring system, sex difference, weight for age, weight for length	NA	NA	NA	NA
n143	nPM143	36578952	Editorial: Bone health and development in children and adolescents	Baronio F, Baptista F.	Front Endocrinol (Lausanne). 2022 Dec 12;13:1101403. doi: 10.3389/fendo.2022.1101403. eCollection 2022.	Baronio F	Front Endocrinol (Lausanne)	2022	2022-12-29	PMC9791941	NA	10.3389/fendo.2022.1101403	TRUE	nEm002	Editorial: Bone health and development in children and adolescents	NA	Baronio F., Baptista F.	(Baronio F., federico.baronio@aosp.bo.it) Department Hospital of Woman and Child, IRCCS Azienda Ospedaliero-Universitaria di Bologna, Bologna, Italy. , (Baptista F.) Department of Sport and Health, CIPER - Centro Interdisciplinar do Estudo da Performance Humana, Faculdade de Motricidade Humana, Universidade de Lisboa, Lisbon, Portugal.	F. Baronio, Department Hospital of Woman and Child, IRCCS Azienda Ospedaliero-Universitaria di Bologna, Bologna, Italy. Email: federico.baronio@aosp.bo.it	NA	2023-01-03	2023-01-18	Frontiers in Endocrinology (2022) 13 Article Number: 1101403. Date of Publication: 12 Dec 2022	Frontiers in Endocrinology	2022	13	NA	NA	NA	2022-12-12	Editorial	NA	NA	NA	NA	1664-2392 (electronic)	NA	Frontiers Media S.A.	NA	NA	androgen,diet,hypophosphatemia,obesity,osteogenesis imperfecta,perfluoroalkyl,puberty,vitamin D	NA	25 hydroxyvitamin D, vitamin D (endogenous compound)	bone development	body mass, bone densitometry, bone density, bone remodeling, bone turnover, editorial, fracture, genetic disorder, human, liquid chromatography-mass spectrometry, osteochondroma, osteogenesis imperfecta, X linked hypophosphatemic rickets	NA	NA	NA	NA
n144	nPM144	33320363	Evolution of the Physical Phenotype of Fetal Alcohol Spectrum Disorders from Childhood through Adolescence	Jacobson SW, Hoyme HE, Carter RC, Dodge NC, Molteno CD, Meintjes EM, Jacobson JL.	Alcohol Clin Exp Res. 2021 Feb;45(2):395-408. doi: 10.1111/acer.14534. Epub 2021 Feb 9.	Jacobson SW	Alcohol Clin Exp Res	2021	2020-12-15	NA	NA	10.1111/acer.14534	TRUE	nEm155	Evolution of the Physical Phenotype of Fetal Alcohol Spectrum Disorders from Childhood through Adolescence	NA	Jacobson S.W., Hoyme H.E., Carter R.C., Dodge N.C., Molteno C.D., Meintjes E.M., Jacobson J.L.	(Jacobson S.W., sandra.jacobson@wayne.edu; Dodge N.C.; Jacobson J.L.) Department of Psychiatry and Behavioral Neurosciences, Wayne State University School of Medicine, Detroit, MI, United States. , (Jacobson S.W., sandra.jacobson@wayne.edu; Meintjes E.M.; Jacobson J.L.) Department of Human Biology, Faculty of Health Sciences, University of Cape Town, Cape Town, South Africa. , (Jacobson S.W., san…	S.W. Jacobson, Department of Psychiatry and Behavioral Neurosciences, Wayne State University School of Medicine, Detroit, MI, United States. Email: sandra.jacobson@wayne.edu""S.W. Jacobson, Department of Human Biology, Faculty of Health Sciences, University of Cape Town, Cape Town, South Africa. Email: sandra.jacobson@wayne.edu""S.W. Jacobson, Department of Psychiatry and Mental Health, Faculty o…	NA	2021-02-22	2021-03-04	Alcoholism: Clinical and Experimental Research (2021) 45:2 (395-408). Date of Publication: 1 Feb 2021	Alcoholism: Clinical and Experimental Research	2021	45	2	395	408	2021-02-01	Article	NA	NA	NA	NA	1530-0277 (electronic),0145-6008	NA	Blackwell Publishing Ltd	Background: This paper reports findings from the first longitudinal study on the evolution of the physical phenotypes of fetal alcohol syndrome (FAS) and partial FAS (PFAS) from early childhood through adolescence. Methods: The sample consisted of 155 children (78 males and 77 females) born to women recruited at an antenatal clinic serving a Cape Coloured (mixed ancestry) population in Cape Town,…	NA	Dysmorphic Features,Fetal Alcohol Spectrum Disorders,Fetal Alcohol Syndrome,Physical Phenotype,Prenatal Alcohol Exposure,Stability and Prevalence of FASD	alcohol	mercury sulfide	fetal alcohol syndrome, partial fetal alcohol syndrome, phenotype	adolescence, adult, alcohol consumption, anthropometric parameters, article, body height, body weight, child, child growth, childhood, clinical assessment, clinical evaluation, clinical feature, cohort analysis, controlled study, face, face dysmorphia, facies, female, growth acceleration, growth curve, head circumference, human, longitudinal study, low birth weight, major clinical study, male, mu…	NA	NA	NA	NA
n145	nPM145	36507367	Detected prenatal perfluorooctanoic acid (PFOA) exposure is associated with decreased fetal head biometric parameters in participants experiencing higher perceived stress during pregnancy in the MADRES cohort	Peterson AK, Eckel SP, Habre R, Yang T, Faham D, Amin M, Grubbs BH, Farzan SF, Kannan K, Robinson M, Lerner D, Al-Marayati LA, Walker DK, Grant EG, Breton CV, Bastain TM.	Environ Adv. 2022 Oct;9:100286. doi: 10.1016/j.envadv.2022.100286. Epub 2022 Sep 8.	Peterson AK	Environ Adv	2022	2022-12-12	PMC9731234	NIHMS1853764	10.1016/j.envadv.2022.100286	FALSE	NA	NA	NA	NA	NA	NA	NA	NA	NA	NA	NA	NA	NA	NA	NA	NA	NA	NA	NA	NA	NA	NA	NA	NA	NA	NA	NA	NA	NA	NA	NA	NA	NA	NA	NA	NA
n146	nPM146	26115335	Prenatal Phthalate, Perfluoroalkyl Acid, and Organochlorine Exposures and Term Birth Weight in Three Birth Cohorts: Multi-Pollutant Models Based on Elastic Net Regression	Lenters V, Portengen L, Rignell-Hydbom A, JÃ¶nsson BA, Lindh CH, Piersma AH, Toft G, Bonde JP, Heederik D, Rylander L, Vermeulen R.	Environ Health Perspect. 2016 Mar;124(3):365-72. doi: 10.1289/ehp.1408933. Epub 2015 Jun 26.	Lenters V	Environ Health Perspect	2016	2015-06-27	PMC4786980	NA	10.1289/ehp.1408933	TRUE	nEm450	Prenatal phthalate, perfluoroalkyl acid, and organochlorine exposures and term birth weight in three birth cohorts: Multi-pollutant models based on elastic net regression	NA	Lenters V., Portengen L., Rignell-Hydbom A., JÃ¶nsson B.A.G., Lindh C.H., Piersma A.H., Toft G., Bonde J.P., Heederik D., Rylander L., Vermeulen R.	(Lenters V., v.c.lenters@uu.nl; Portengen L.; Heederik D.; Vermeulen R.) Division of Environmental Epidemiology, Institute for Risk Assessment Sciences, Utrecht University, Utrecht, Netherlands. , (Rignell-Hydbom A.; JÃ¶nsson B.A.G.; Lindh C.H.; Rylander L.) Division of Occupational and Environmental Medicine, Lund University, Lund, Sweden. , (Piersma A.H.) Laboratory for Health Protection Resear…	V. Lenters, Institute for Risk Assessment Sciences, Utrecht University, Yalelaan 2, Utrecht, Netherlands. Email: v.c.lenters@uu.nl	NA	2016-03-09	2016-03-14	Environmental Health Perspectives (2016) 124:3 (365-372). Date of Publication: 1 Mar 2016	Environmental Health Perspectives	2016	124	3	365	372	2016-03-01	Article	NA	NA	NA	NA	1552-9924 (electronic),0091-6765	NA	Public Health Services, US Dept of Health and Human Services	Background: Some legacy and emerging environmental contaminants are suspected risk factors for intrauterine growth restriction. However, the evidence is equivocal, in part due to difficulties in disentangling the effects of mixtures. Objectives: We assessed associations between multiple correlated biomarkers of environmental exposure and birth weight. Methods: We evaluated a cohort of 1,250 term …	NA	NA	chemical compound, organochlorine derivative, perfluoroalkyl acid, phthalic acid	cotinine, diisononyl phthalate, phthalic acid bis(2 ethylhexyl) ester, unclassified drug, vitamin D	birth weight, prenatal drug exposure	adult, article, blood analysis, body mass, female, gas chromatography, human, interview, intrauterine growth retardation, lipid analysis, liquid chromatography, male, maternal age, maternal smoking, newborn, parity, prenatal care, priority journal, risk factor, tandem mass spectrometry	NA	NA	NA	NA
n147	nPM147	34357911	Placental Transfer and Composition of Perfluoroalkyl Substances (PFASs): A Korean Birth Panel of Parent-Infant Triads	Kang H, Kim HS, Yoon YS, Lee J, Kho Y, Lee J, Chang HJ, Cho YH, Kim YA.	Toxics. 2021 Jul 14;9(7):168. doi: 10.3390/toxics9070168.	Kang H	Toxics	2021	2021-08-06	PMC8309930	NA	10.3390/toxics9070168	TRUE	nEm118	Placental transfer and composition of perfluoroalkyl substances (PFASs): A Korean birth panel of parent-infant triads	NA	Kang H., Kim H.-S., Yoon Y.S., Lee J., Kho Y., Lee J., Chang H.J., Cho Y.H., Kim Y.A.	(Kang H., habyeonk@umich.edu) Department of Environmental Health Sciences, School of Public Health, Seoul National University, Seoul, South Korea. , (Kang H., habyeonk@umich.edu) Department of Epidemiology, School of Public Health, University of Michigan, Ann Arbor, MI, United States. , (Kim H.-S., smallkong7@gmail.com) Departments of Obstetrics and Gynecology, Dongguk University Ilsan Hospital, …	Y.H. Cho, Department of Biomedical and Pharmaceutical Sciences, The University of Montana, Missoula, MT, United States. Email: yoonhee.cho@umontana.edu""Y.A. Kim, Departments of Obstetrics and Gynecology, Inje University, Ilsan Paik Hospital, Goyang-si, South Korea. Email: camanbal@paik.ac.kr	NA	2021-07-30	2021-11-19	Toxics (2021) 9:7 Article Number: 168. Date of Publication: 1 Jul 2021	Toxics	2021	9	7	NA	NA	2021-07-01	Article	NA	NA	NA	NA	2305-6304 (electronic)	NA	MDPI	Exposure to perfluoroalkyl substances (PFASs) is of public concern due to their persistent exposure and adverse health effects. Placental transfer of PFASs is an important excretion pathway of these chemicals in pregnant women and exposure route in fetuses. We measured PFAS concentrations in maternal, paternal, and umbilical cord serum collected from 62 pregnant Korean women and matched biologica…	NA	Cord blood,Perfluoroalkyl acids,Placenta,Pregnancy,Prenatal exposure	organofluorine derivative, perfluoroalkyl substance	carbon, carboxylic acid derivative, perfluorobutane sulfonate, perfluorodecanoic acid, perfluorododecanoic acid, perfluorohexanesulfonic acid, perfluorohexanoic acid, perfluorononanoic acid, perfluorooctanesulfonic acid, perfluorooctanoic acid, perfluoropentanoic acid, perfluorotetradecanoic acid, perfluorotridecanoic acid, perfluoroundecanoic acid, sulfonic acid derivative, unclassified drug	blood level, placental transfer, pregnancy	adult, article, birth weight, blood sampling, body mass, body weight, chemical composition, cord serum, father, female, fetus, gestational age, human, male, maternal serum, newborn, pregnant woman, prenatal exposure, South Korean	NA	NA	NA	NA
n148	nPM148	28669937	Perfluoroalkyl Substances during Pregnancy and Offspring Weight and Adiposity at Birth: Examining Mediation by Maternal Fasting Glucose in the Healthy Start Study	Starling AP, Adgate JL, Hamman RF, Kechris K, Calafat AM, Ye X, Dabelea D.	Environ Health Perspect. 2017 Jun 26;125(6):067016. doi: 10.1289/EHP641.	Starling AP	Environ Health Perspect	2017	2017-07-04	PMC5743451	NA	10.1289/ehp641	TRUE	nEm389	Perfluoroalkyl substances during pregnancy and offspring weight and adiposity at birth: Examining mediation by maternal fasting glucose in the healthy start study	NA	Starling A.P., Adgate J.L., Hamman R.F., Kechris K., Calafat A.M., Ye X., Dabelea D.	(Starling A.P., anne.starling@ucdenver.edu; Hamman R.F.; Dabelea D.) Department of Epidemiology, Colorado School of Public Health, Aurora, CO, United States. , (Adgate J.L.) Department of Environmental and Occupational Health, Colorado School of Public Health, Aurora, CO, United States. , (Kechris K.) Department of Biostatistics and Informatics, Colorado School of Public Health, Aurora, CO, Unite…	A.P. Starling, Dept. of Epidemiology, Colorado School of Public Health, University of Colorado Anschutz Medical Campus, 12474 E. 19th Ave, Campus Box F426, Aurora, CO, United States. Email: anne.starling@ucdenver.edu	NA	2017-11-15	2017-11-17	Environmental Health Perspectives (2017) 125:6 Article Number: 067016. Date of Publication: 1 Jun 2017	Environmental Health Perspectives	2017	125	6	NA	NA	2017-06-01	Article	NA	NA	NA	NA	1552-9924 (electronic),0091-6765	NA	Public Health Services, US Dept of Health and Human Services	BACKGROUND: Certain perfluoroalkyl and polyfluoroalkyl substances (PFAS) are widespread, persistent environmental contaminants. Prenatal PFAS exposure has been associated with lower birth weight; however, impacts on body composition and factors responsible for this association are unknown. OBJECTIVES: We aimed to estimate associations between maternal PFAS concentrations and offspring weight and …	NA	NA	perfluoroalkanoic acid	lipid, perfluorohexanesulfonic acid, perfluorononanoic acid, perfluorooctanoic acid	birth weight, maternal exposure, obesity, pregnancy	adolescent, adult, article, body composition, female, fetus outcome, glucose blood level, human, infant, maternal fasting glucose, normal human, outcome assessment, plethysmography, priority journal, prospective study, second trimester pregnancy, umbilical cord blood	NA	NA	NA	NA
n149	nPM149	32980420	Perfluorooctane sulfonic acid (PFOS) exposure during pregnancy increases blood pressure and impairs vascular relaxation mechanisms in the adult offspring	Dangudubiyyam SV, Mishra JS, Zhao H, Kumar S.	Reprod Toxicol. 2020 Dec;98:165-173. doi: 10.1016/j.reprotox.2020.09.008. Epub 2020 Sep 24.	Dangudubiyyam SV	Reprod Toxicol	2020	2020-09-27	PMC7736219	NIHMS1634040	10.1016/j.reprotox.2020.09.008	TRUE	nEm185	Perfluorooctane sulfonic acid (PFOS) exposure during pregnancy increases blood pressure and impairs vascular relaxation mechanisms in the adult offspring	NA	Dangudubiyyam S.V., Mishra J.S., Zhao H., Kumar S.	(Dangudubiyyam S.V., sdangudubiyy@wisc.edu; Mishra J.S., jay.mishra@wisc.edu; Zhao H., hzhao274@wisc.edu; Kumar S., skumar82@wisc.edu) Department of Comparative Biosciences, School of Veterinary Medicine, University of Wisconsin, Madison, WI, United States. , (Dangudubiyyam S.V., sdangudubiyy@wisc.edu; Kumar S., skumar82@wisc.edu) Endocrinology-Reproductive Physiology Program, University of Wisco…	S. Kumar, Department of Comparative Biosciences and Obstetrics and Gynecology, University of Wisconsin, Madison, 2015, Linden Drive, Madison, WI, United States. Email: skumar82@wisc.edu	NA	2020-10-12	2021-03-25	Reproductive Toxicology (2020) 98 (165-173). Date of Publication: 1 Dec 2020	Reproductive Toxicology	2020	98	NA	165	173	2020-12-01	Article	NA	NA	NA	NA	1873-1708 (electronic),0890-6238	NA	Elsevier Inc.	Perfluorooctanesulfonate (PFOS) is a persistent environmental agent. We examined whether PFOS exposure during pregnancy alters blood pressure in male and female offspring, and if this is related to sex-specific changes in vascular mechanisms. PFOS was administered through drinking water (50 Î¼g/mL) to pregnant Sprague-Dawley rats from gestational day 4 until delivery. PFOS-exposure decreased mate…	NA	Birth weight,Blood pressure,Endothelium,eNOS,Fetal programming,PFOS,Pregnancy,Vascular smooth muscle	perfluorooctanesulfonic acid (drug toxicity)	acetylcholine, drinking water, endothelial nitric oxide synthase (endogenous compound), nitroprusside sodium	maternal hypertension, pregnancy, prenatal exposure, progeny, vasodilatation	adult, adulthood, animal experiment, animal tissue, article, body weight loss, catch up growth, controlled study, elevated blood pressure, endothelial dysfunction, enzyme activity, enzyme analysis, enzyme phosphorylation, female, fluid intake, food intake, gestation period, gestational weight gain, low birth weight, male, mesenteric artery, newborn, nonhuman, obstetric delivery, protein expressio…	NA	NA	NA	NA
n150	nPM150	20494442	Infant exposure of perfluorinated compounds: levels in breast milk and commercial baby food	Llorca M, FarrÃ© M, PicÃ³ Y, TeijÃ³n ML, Alvarez JG, BarcelÃ³ D.	Environ Int. 2010 Aug;36(6):584-92. doi: 10.1016/j.envint.2010.04.016. Epub 2010 May 21.	Llorca M	Environ Int	2010	2010-05-25	NA	NA	10.1016/j.envint.2010.04.016	TRUE	nEm659	Infant exposure of perfluorinated compounds: Levels in breast milk and commercial baby food	NA	Llorca M., FarrÃ© M., PicÃ³ Y., TeijÃ³n M.L., Ãlvarez J.G., BarcelÃ³ D.	(Llorca M.; FarrÃ© M., mfuqam@cid.csic.es; BarcelÃ³ D.) Department of Environmental Chemistry, IDAEA-CSIC, Barcelona, Spain. , (PicÃ³ Y.) Nutrition and Food Chemistry Laboratory, University of Valencia, Valencia, Spain. , (TeijÃ³n M.L.; Ãlvarez J.G.) Servicio de ReproducciÃ³n, Instituto MarquÃ©s, Barcelona, Spain. , (TeijÃ³n M.L.; Ãlvarez J.G.) FundaciÃ³ Leonardo MarquÃ©s, Barcelona, Spain. , (…	M. FarrÃ©, Department of Environmental Chemistry, IDAEA-CSIC, Barcelona, Spain. Email: mfuqam@cid.csic.es	NA	2010-05-25	2010-07-01	Environment International (2010) 36:6 (584-592). Date of Publication: August 2010	Environment International	2010	36	6	584	592	2023-08-10	Article	NA	NA	NA	NA	1873-6750 (electronic),0160-4120	NA	Elsevier Ltd	In this study, an analytical method to determine six perfluorinated compounds (PFCs) based on alkaline digestion and solid phase extraction (SPE) followed by liquid chromatography-quadrupole-linear ion trap mass spectrometry (LC-QqLIT-MS) was validated for the analysis of human breast milk, milk infant formulas and cereals baby food. The average recoveries of the different matrices were in genera…	NA	Baby food,Breast milk,Infant formulas,LC-QLIT-MS,Perfluorinated chemicals	perfluoro compound	perfluoro 7 methyloctanoic acid, perfluorodecanoic acid, perfluorooctanesulfonic acid, perfluorooctanoic acid, unclassified drug	baby food, breast milk	alkaline digestion, analytic method, article, artificial milk, body weight, cereal, container, controlled study, food analysis, food intake, food packaging, human, ion trap mass spectrometry, leaching, liquid chromatography, priority journal, quantitative analysis, risk assessment, sampling, solid phase extraction	NA	NA	NA	NA
n151	nPM151	28128969	Prenatal Exposure to Perfluoroalkyl Substances and Body Fatness in Girls	Hartman TJ, Calafat AM, Holmes AK, Marcus M, Northstone K, Flanders WD, Kato K, Taylor EV.	Child Obes. 2017 Jun;13(3):222-230. doi: 10.1089/chi.2016.0126. Epub 2017 Jan 27.	Hartman TJ	Child Obes	2017	2017-01-28	PMC5444423	NA	10.1089/chi.2016.0126	TRUE	nEm391	Prenatal Exposure to Perfluoroalkyl Substances and Body Fatness in Girls	NA	Hartman T.J., Calafat A.M., Holmes A.K., Marcus M., Northstone K., Flanders W.D., Kato K., Taylor E.V.	(Hartman T.J.; Calafat A.M.; Holmes A.K.; Flanders W.D.; Kato K.; Taylor E.V.) 1 Centers for Disease Control and Prevention , Atlanta, GA, (Hartman T.J.; Marcus M.; Flanders W.D.) 2 Department of Epidemiology, Rollins School of Public Health, Emory University , Atlanta, GA, (Hartman T.J.; Flanders W.D.) 3 Winship Cancer Institute, Emory University , Atlanta, GA, (Northstone K.) 4 The National Ins…	NA	NA	NA	2018-03-15	Childhood obesity (Print) (2017) 13:3 (222-230). Date of Publication: 1 Jun 2017	Childhood obesity (Print)	2017	13	3	222	230	2017-06-01	Article	NA	NA	NA	NA	2153-2176 (electronic)	NA	NA	BACKGROUND: Perfluoroalkyl substances (PFASs) are used in surface coatings that resist stains, grease, and water.METHODS: The association between in utero PFAS exposure and girls' body fatness at age 9 was analyzed in The Avon Longitudinal Study of Parents and Children (UK). Maternal serum [median 15 weeks: interquartile range (IQR) 10 and 28 weeks of gestation] was analyzed for perfluorooctane s…	NA	body composition,epidemiology,obesity	NA	alkanesulfonic acid, fluorocarbon (adverse drug reaction), hexadecafluoro-nonanoic acid, octanoic acid derivative, perfluorohexanesulfonic acid, perfluorooctanesulfonic acid, perfluorooctanoic acid, sulfonic acid derivative	body composition, educational status, prenatal exposure	blood, child, childhood obesity (epidemiology), female, human, pregnancy, United Kingdom	NA	NA	NA	NA
n152	nPM152	33220988	Prenatal exposure to perfluoroalkyl and polyfluoroalkyl substances and birth outcomes: A longitudinal cohort with repeated measurements	Chen L, Tong C, Huo X, Zhang J, Tian Y; Shanghai Birth Cohort.	Chemosphere. 2021 Mar;267:128899. doi: 10.1016/j.chemosphere.2020.128899. Epub 2020 Nov 7.	Chen L	Chemosphere	2021	2020-11-22	NA	NA	10.1016/j.chemosphere.2020.128899	TRUE	nEm146	Prenatal exposure to perfluoroalkyl and polyfluoroalkyl substances and birth outcomes: A longitudinal cohort with repeated measurements	NA	Chen L., Tong C., Huo X., Zhang J., Tian Y.	(Chen L.; Huo X.; Zhang J., junjimzhang@sina.com; Tian Y., tianmiejp@sjtu.edu.cn) Ministry of Education-Shanghai Key Laboratory of Children's Environmental Health, Xinhua Hospital, Shanghai Jiao Tong University School of Medicine, Shanghai, China. , (Tong C.) The International Peace Maternity & Child Health Hospital of China Welfare Institute, Shanghai Jiao Tong University School of Medicine, Sha…	J. Zhang, Xinhua Hospital, Shanghai Jiao Tong University School of Medicine, Shanghai, China. Email: junjimzhang@sina.com""Y. Tian, Xinhua Hospital, Shanghai Jiao Tong University School of Medicine, Shanghai, China. Email: tianmiejp@sjtu.edu.cn	NA	2020-11-25	2022-11-10	Chemosphere (2021) 267 Article Number: 128899. Date of Publication: 1 Mar 2021	Chemosphere	2021	267	NA	NA	NA	2021-03-01	Article	NA	NA	NA	NA	1879-1298 (electronic),0045-6535	NA	Elsevier Ltd	Background: Previous studies on perfluoroalkyl and polyfluoroalkyl substances (PFAS) showed inconsistent results when biological samples were collected in different time of pregnancy. Objectives: To describe the change of PFAS concentration during pregnancy and to identify a sensitive window for adverse effects of PFAS on the fetus. Methods: A total of 255 pregnant women were selected from the Sh…	NA	Birth length,PFAS,Pregnant,SBC	perfluoroalkanoic acid (drug toxicity)	perfluorodecanoic acid (drug toxicity), perfluorododecanoic acid (drug toxicity), perfluoroheptanoic acid (drug toxicity), perfluorohexanesulfonic acid (drug toxicity), perfluorononanoic acid (drug toxicity), perfluorooctane sulfonamide (drug toxicity), perfluorooctanesulfonic acid (drug toxicity), perfluorooctanoic acid (drug toxicity), perfluoroundecanoic acid (drug toxicity)	pregnancy outcome, prenatal exposure	adult, birth weight, body height, cohort analysis, controlled study, female, fetus, first trimester pregnancy, follow up, head circumference, human, human experiment, limit of detection, liquid chromatography-mass spectrometry, longitudinal study, major clinical study, male, maternal plasma, measurement repeatability, perfluorobutane sulfonic acid, pregnant woman, second trimester pregnancy, thir…	NA	NA	NA	NA
n153	nPM153	34182087	Maternal exposure to perfluoroalkyl chemicals and anogenital distance in the offspring: A Faroese cohort study	Christensen JVR, Bangash KK, Weihe P, Grandjean P, Nielsen F, Jensen TK, Petersen MS.	Reprod Toxicol. 2021 Sep;104:52-57. doi: 10.1016/j.reprotox.2021.06.016. Epub 2021 Jun 25.	Christensen JVR	Reprod Toxicol	2021	2021-06-28	PMC8403157	NIHMS1723387	10.1016/j.reprotox.2021.06.016	TRUE	nEm098	Maternal exposure to perfluoroalkyl chemicals and anogenital distance in the offspring: A Faroese cohort study	NA	Christensen J.V.R., Bangash K.K., Weihe P., Grandjean P., Nielsen F., Jensen T.K., Petersen M.S.	(Christensen J.V.R.; Bangash K.K.; Grandjean P.; Nielsen F.; Jensen T.K.) Department of Pharmacology, Clinical Pharmacy and Environmental Medicine, University of Southern Denmark, Odense, Denmark. , (Weihe P.; Petersen M.S., maria@health.fo) Department of Occupational Medicine and Public Health, The Faroes Hospital System, TÃ³rshavn, Faroe Islands. , (Weihe P.; Petersen M.S., maria@health.fo) Cen…	M.S. Petersen, SigmundargÃ¸ta 5, TÃ³rshavn, Faroe Islands. Email: maria@health.fo	NA	2021-07-08	2021-12-21	Reproductive Toxicology (2021) 104 (52-57). Date of Publication: 1 Sep 2021	Reproductive Toxicology	2021	104	NA	52	57	2021-09-01	Article	NA	NA	NA	NA	1873-1708 (electronic),0890-6238	NA	Elsevier Inc.	Exposure to perfluoroalkyl substances (PFASs) has in some studies been associated with reduced anogenital distance (AGD) in newborns as a sensitive indicator of prenatal anti-androgenic exposure. The aim of this study was to investigate the association between maternal PFAS exposure and offspring AGD in a population with wide ranges of PFAS exposures. Participants were recruited in the Faroe Isla…	NA	Anogenital distance,Faroe Islands,Perfluorinated compounds,PFAS,Prenatal exposure	perfluorodecanoic acid (special situation for pharmacovigilance), perfluorohexanesulfonic acid (special situation for pharmacovigilance), perfluorononanoic acid (special situation for pharmacovigilance), perfluorooctanesulfonic acid (special situation for pharmacovigilance), perfluorooctanoic acid (special situation for pharmacovigilance)	NA	anogenital distance, prenatal exposure	adult, article, birth weight, body mass, cohort analysis, education, educational status, female, human, human experiment, infant, liquid chromatography-mass spectrometry, male, maternal serum, maternal smoking, normal human, parity, progeny, prospective study, quality control, questionnaire, reproductive health, sex difference	NA	NA	NA	NA
n154	nPM154	18511431	Effects of perfluorobutyrate exposure during pregnancy in the mouse	Das KP, Grey BE, Zehr RD, Wood CR, Butenhoff JL, Chang SC, Ehresman DJ, Tan YM, Lau C.	Toxicol Sci. 2008 Sep;105(1):173-81. doi: 10.1093/toxsci/kfn099. Epub 2008 May 28.	Das KP	Toxicol Sci	2008	2008-05-31	NA	NA	10.1093/toxsci/kfn099	TRUE	nEm692	Effects of perfluorobutyrate exposure during pregnancy in the mouse	NA	Das K.P., Grey B.E., Zehr R.D., Wood C.R., Butenhoff J.I., Chang S.-C., Ehresman D.J., Tan Y.-M., Lau C.	(Das K.P.; Grey B.E.; Zehr R.D.; Wood C.R.; Lau C., lau.christopher@epa.gov) Reproductive Toxicology Division, National Health and Environmental Effects Research Laboratory, Office of Research and Development, Research Triangle Park, NC 27711, United States. , (Butenhoff J.I.; Chang S.-C.; Ehresman D.J.) Medical Department, 3M Corporation, St Paul, MN 55144, United States. , (Tan Y.-M.) The Hamne…	C. Lau, U.S. Environmental Protection Agency, Research Triangle Park, NC 27711, United States. Email: lau.christopher@epa.gov	NA	NA	2008-08-29	Toxicological Sciences (2008) 105:1 (173-181). Date of Publication: 2008	Toxicological Sciences	2008	105	1	173	181	2008	Article	NA	NA	NA	NA	1096-6080,1096-0929 (electronic)	NA	Oxford University Press, 2001 Evans Road, Cary, United States.	Perfluorobutyrate (PFBA) is a perfluoroalkyl acid (PFAA) found in the environment. Previous studies have indicated developmental toxicity of PFAAs (perfluorooctane sulfonate [PFOS] and perfluorooctanoate [PFOA]); the current study examines that of PFBA. PFBA/NH(4)(+) was given to timed-pregnant CD-1 mice by oral gavage daily from gestational day (GD) 1 to 17 at 35, 175, or 350 mg/kg (chosen to ap…	NA	Developmental toxicity,Mouse,Perfluorobutyrate,Pregnancy	fluorocarbon (drug toxicity), perfluorobutyric acid (drug toxicity)	ammonia, perfluorooctanesulfonic acid (drug toxicity), perfluorooctanoic acid (drug toxicity), water	NA	article, blood level, body weight gain, delayed puberty, feeding, female, fetal well being, fetus malformation, fetus weight, gestational age, hepatomegaly, incidence, liver weight, mouse, newborn mortality, nonhuman, postnatal growth, pregnancy outcome, progeny	NA	NA	NA	NA
n155	nPM155	36030647	Effect of perfluoroalkyl exposure in pregnancy and infancy on intrauterine and childhood growth and anthropometry. Sub study from COPSAC2010 birth cohort	Sevelsted A, GÃ¼rdeniz G, Rago D, Pedersen CT, Lasky-Su JA, Checa A, Zhang P, Wheelock CE, Normann SS, Kristensen DM, Rasmussen MA, Schullehner J, Sdougkou K, Martin JW, Stokholm J, BÃ¸nnelykke K, Bisgaard H, Chawes B.	EBioMedicine. 2022 Sep;83:104236. doi: 10.1016/j.ebiom.2022.104236. Epub 2022 Aug 26.	Sevelsted A	EBioMedicine	2022	2022-08-28	PMC9434040	NA	10.1016/j.ebiom.2022.104236	TRUE	nEm030	Effect of perfluoroalkyl exposure in pregnancy and infancy on intrauterine and childhood growth and anthropometry. Sub study from COPSAC2010 birth cohort	NA	Sevelsted A., GÃ¼rdeniz G., Rago D., Pedersen C.-E.T., Lasky-Su J.A., Checa A., Zhang P., Wheelock C.E., Normann S.S., Kristensen D.M., Rasmussen M.A., Schullehner J., Sdougkou K., Martin J.W., Stokholm J., BÃ¸nnelykke K., Bisgaard H., Chawes B.	(Sevelsted A.; GÃ¼rdeniz G.; Rago D.; Pedersen C.-E.T.; Normann S.S.; Rasmussen M.A.; Stokholm J.; BÃ¸nnelykke K.; Bisgaard H.; Chawes B., chawes@copsac.com) COPSAC, Copenhagen Prospective Studies on Asthma in Childhood, Herlev and Gentofte Hospital, University of Copenhagen, Copenhagen, Denmark. , (Lasky-Su J.A.) Brigham and Women's Hospital and Harvard Medical School, Boston, MA, United States.…	B. Chawes, COPSAC, Copenhagen Prospective Studies on Asthma in Childhood, Herlev and Gentofte Hospital, University of Copenhagen, Copenhagen, Denmark. Email: chawes@copsac.com	NA	2022-08-30	NA	eBioMedicine (2022) 83 Article Number: 104236. Date of Publication: 1 Sep 2022	eBioMedicine	2022	83	NA	NA	NA	2022-09-01	Article	NA	NA	NA	NA	2352-3964 (electronic)	NA	Elsevier B.V.	Background: Perfluoroalkyl substances PFOS and PFOA are persistent and bioaccumulative exogenous chemicals in the human body with a range of suspected negative health effects. It is hypothesised that exposure during prenatal and early postnatal life might have particularly detrimental effects on intrauterine and childhood growth. In a Danish longitudinal mother-child cohort we investigate effect …	NA	BMI,Child,Growth,Lactocyl Ceramides,MeSH,Metabolomics,Molecular epidemiology,Mother-child cohort,PFOA,PFOS,Xenobiotics	ceramide, perfluorooctanoic acid, xenobiotic agent	lactosylceramide	anthropometry, birth cohort, body mass, childhood, infancy, metabolomics, molecular epidemiology, pregnancy	adult, article, child, cohort analysis, controlled study, European Union, female, fetus, fetus growth, funding, heart, HLF cell line (lung fibroblast), human, human cell, human experiment, human tissue, major clinical study, male, maternal plasma, metabolism, mother, observational study, phenotype, pipeline, pregnant woman	NA	NA	NA	NA
n156	nPM156	30055518	Endocrine disruptors and neonatal anthropometry, NICHD Fetal Growth Studies - Singletons	Buck Louis GM, Zhai S, Smarr MM, Grewal J, Zhang C, Grantz KL, Hinkle SN, Sundaram R, Lee S, Honda M, Oh J, Kannan K.	Environ Int. 2018 Oct;119:515-526. doi: 10.1016/j.envint.2018.07.024. Epub 2018 Jul 26.	Buck Louis GM	Environ Int	2018	2018-07-29	PMC6267852	NIHMS986048	10.1016/j.envint.2018.07.024	TRUE	nEm324	Endocrine disruptors and neonatal anthropometry, NICHD Fetal Growth Studies - Singletons	NA	Buck Louis G.M., Zhai S., Smarr M.M., Grewal J., Zhang C., Grantz K.L., Hinkle S.N., Sundaram R., Lee S., Honda M., Oh J., Kannan K.	(Buck Louis G.M., glouis@gmu.edu; Smarr M.M.; Grewal J.) Division of Intramural Population Health Research, Eunice Kennedy Shriver National Institute of Child Health and Human Development, 6710b Rockledge Drive, Bethesda, MD, United States. , (Buck Louis G.M., glouis@gmu.edu) College of Health and Human Services, George Mason University, 4400 University Drive, MS2G7, Fairfax, VA, United States. ,…	G.M. Buck Louis, Division of Intramural Population Health Research, Eunice Kennedy Shriver National Institute of Child Health and Human Development, 6710b Rockledge Drive, Bethesda, MD, United States. Email: glouis@gmu.edu	NA	2018-08-01	2020-12-11	Environment International (2018) 119 (515-526). Date of Publication: 1 Oct 2018	Environment International	2018	119	NA	515	526	2018-10-01	Article	NA	NA	NA	NA	1873-6750 (electronic),0160-4120	NA	Elsevier Ltd	Background: Intrauterine exposure to endocrine disrupting chemicals (EDCs) has been equivocally associated with birth weight, length and head circumference with limited attention to anthropometric endpoints such as umbilical circumference and limb lengths. Objective: To explore 76 prenatal maternal plasma EDC concentrations in a healthy obstetric cohort and 7 neonatal anthropometric endpoints by …	NA	Anthropometry,Endocrine disrupting chemicals,Fetal growth,Neonate,Pregnancy	endocrine disruptor (drug toxicity)	alkyl group (drug toxicity), cotinine, lipid (endogenous compound), perfluorodecanoic acid (drug toxicity), perfluorooctanoic acid (drug toxicity), polychlorinated biphenyl (drug toxicity)	anthropometry, fetus growth	adult, age, anthropometric parameters, arm circumference, arm length, article, Asian, birth weight, Black person, blood analysis, body height, body mass, Caucasian, childbirth, cohort analysis, educational status, ethnic difference, female, head circumference, Hispanic, human, leg length, liquid chromatography-mass spectrometry, mass fragmentography, maternal blood, newborn, normal human, prenata…	NA	NA	NA	NA
n157	nPM157	27276029	Brief Report: Plasma Concentrations of Perfluorooctane Sulfonamide and Time-to-pregnancy Among Primiparous Women	Whitworth KW, Haug LS, Sabaredzovic A, Eggesbo M, Longnecker MP.	Epidemiology. 2016 Sep;27(5):712-5. doi: 10.1097/EDE.0000000000000524.	Whitworth KW	Epidemiology	2016	2016-06-09	PMC5387409	NIHMS854434	10.1097/ede.0000000000000524	TRUE	nEm431	Brief report: Plasma concentrations of perfluorooctane sulfonamide and time-to-pregnancy among primiparous women	NA	Whitworth K.W., Haug L.S., Sabaredzovic A., Eggesbo M., Longnecker M.P.	(Whitworth K.W., Kristina.w.whitworth@uth.tmc.edu) Department of Epidemiology, Human Genetics and Environmental Sciences, School of Public Health at Houston, San Antonio Regional Campus, University of Texas, 7411 John Smith Drive, San Antonio, TX, United States. , (Whitworth K.W., Kristina.w.whitworth@uth.tmc.edu) Southwest Center for Occupational and Environmental Health, University of Texas, Sc…	K.W. Whitworth, Department of Epidemiology, Human Genetics and Environmental Sciences, School of Public Health at Houston, San Antonio Regional Campus, University of Texas, 7411 John Smith Drive, San Antonio, TX, United States. Email: Kristina.w.whitworth@uth.tmc.edu	NA	2016-06-14	2016-08-23	Epidemiology (2016) 27:5 (712-715). Date of Publication: 1 Sep 2016	Epidemiology	2016	27	5	712	715	2016-09-01	Article	NA	NA	NA	NA	1531-5487 (electronic),1044-3983	NA	Lippincott Williams and Wilkins, kathiest.clai@apta.org	Background: A previous study reported a negative association between perfluorooctane sulfonamide (PFOSA) concentrations and fecundability. Methods: We examined this association among women enrolled in the Norwegian Mother and Child Cohort Study (MoBa), in 2003-2004. This analysis was restricted to 451 primiparous women to avoid bias due to previous pregnancy. Self-reported time-to-pregnancy (TTP)…	NA	NA	perfluorooctane sulfonamide (endogenous compound), perfluorooctanesulfonic acid (endogenous compound)	unclassified drug	primipara, time to pregnancy	adult, article, body mass, cohort analysis, female, female fertility, gestational age, human, major clinical study, priority journal, retrospective study, self report, survival time, young adult	NA	NA	NA	NA
n158	nPM158	36355941	Perfluoroalkyl Mixture Exposure in Relation to Fetal Growth: Potential Roles of Maternal Characteristics and Associations with Birth Outcomes	Shen C, Ding J, Xu C, Zhang L, Liu S, Tian Y.	Toxics. 2022 Oct 28;10(11):650. doi: 10.3390/toxics10110650.	Shen C	Toxics	2022	2022-11-10	PMC9695392	NA	10.3390/toxics10110650	TRUE	nEm015	Perfluoroalkyl Mixture Exposure in Relation to Fetal Growth: Potential Roles of Maternal Characteristics and Associations with Birth Outcomes	NA	Shen C., Ding J., Xu C., Zhang L., Liu S., Tian Y.	(Shen C.; Ding J.; Xu C., xcy0714@dhu.edu.cn) College of Environmental Science and Engineering, Donghua University, Shanghai, China. , (Shen C.; Xu C., xcy0714@dhu.edu.cn) Shanghai Institute of Pollution Control and Ecological Security, Shanghai, China. , (Zhang L.; Tian Y., tianyh@zju.edu.cn) Womenâ€™s Hospital, Zhejiang University School of Medicine, Hangzhou, China. , (Liu S.) Interdisciplinar…	C. Xu, College of Environmental Science and Engineering, Donghua University, Shanghai, China. Email: xcy0714@dhu.edu.cn""Y. Tian, Womenâ€™s Hospital, Zhejiang University School of Medicine, Hangzhou, China. Email: tianyh@zju.edu.cn	NA	2022-11-17	2022-12-02	Toxics (2022) 10:11 Article Number: 650. Date of Publication: 1 Nov 2022	Toxics	2022	10	11	NA	NA	2022-11-01	Article	NA	NA	NA	NA	2305-6304 (electronic)	NA	MDPI	Perfluoroalkyl substances (PFASs) exposure is suggested to interfere with fetal growth. However, limited investigations considered the roles of parity and delivery on PFASs distributions and the joint effects of PFASs mixture on birth outcomes. In this study, 506 birth cohorts were investigated in Hangzhou, China with 14 PFASs measured in maternal serum. Mothers with higher maternal ages who unde…	NA	apgar scores,birth weight,maternal determinants,mixture effects,perfluoroalkyl substances,prenatal exposure,preterm birth	perfluoroalkyl substance (drug toxicity), polyfunctional group (drug toxicity)	perfluoroalkyl carboxylic acid (drug toxicity), perfluoroalkyl sulfonic acid (drug toxicity), perfluoroheptane sulphonate (drug toxicity), perfluoroheptanoic acid (drug toxicity), perfluorononane sulfonate (drug toxicity), perfluorooctanesulfonic acid (drug toxicity), perfluorooctanoic acid (drug toxicity), progesterone (endogenous compound), testosterone (endogenous compound), unclassified drug	fetus growth, pregnancy outcome, prenatal exposure	acute toxicity, adult, Apgar score, article, birth cohort, birth weight, cesarean section, controlled study, female, fetus development, high performance liquid chromatograph, human, human tissue, lower respiratory tract infection, major clinical study, male, maternal serum, newborn, outcome assessment, parity, placental transfer, premature labor, prematurity, reproductive toxicity, risk assessmen…	NA	NA	ACQUITY UPLC	NA
n159	nPM159	24520202	No association between perfluoroalkyl chemicals and hypertension in children	Geiger SD, Xiao J, Shankar A.	Integr Blood Press Control. 2014 Jan 13;7:1-7. doi: 10.2147/IBPC.S47660. eCollection 2014.	Geiger SD	Integr Blood Press Control	2014	2014-02-13	PMC3920456	NA	10.2147/ibpc.s47660	TRUE	nEm514	No association between perfluoroalkyl chemicals and hypertension in children	NA	Geiger S.D., Xiao J., Shankar A.	(Geiger S.D., geiger@niu.edu) Department of Public Health, Northern Illinois University, School of Nursing and Health Studies, DeKalb, IL, United States. , (Xiao J.) Rregistration and Records, North Carolina State University, Raleigh, NC, United States. , (Shankar A.) Department of Epidemiology, School of Public Health, West Virginia University, Morgantown, WV, United States.	S. D. Geiger, Department of Public Health, Northern Illinois University, 255 Wirtz Hall, DeKalb, IL 60115, United States. Email: geiger@niu.edu	NA	2014-01-24	2014-02-03	Integrated Blood Pressure Control (2014) 7:1 (1-7). Date of Publication: 13 Jan 2014	Integrated Blood Pressure Control	2014	7	1	1	7	2014-01-13	Article	NA	NA	NA	NA	1178-7104 (electronic)	NA	Dove Medical Press Ltd., PO Box 300-008, Albany, Auckland, New Zealand.	Background: Hypertension is a leading cause of cardiovascular disease worldwide. Perfluorooctanoic acid (PFOA) and perfluorooctane sulfonate (PFOS) are perfluoroalkyl chemicals (PFCs) used in the manufacture of common consumer products and detected in the blood of the majority of Americans. Emerging biological data suggest that PFC exposure may have a role in the development of hypertension. Howe…	NA	Blood pressure,Children,Perfluoroalkyl chemicals,Perfluorooctane sulfonate,Perfluorooctanoic acid	perfluorooctanesulfonic acid, perfluorooctanoic acid	cholesterol (endogenous compound), cotinine (endogenous compound)	hypertension	adolescent, article, Black person, blood level, body mass, Caucasian, cholesterol blood level, cotinine blood level, cross-sectional study, diastolic blood pressure, environmental exposure, female, Hispanic, human, male, perfluorooctanesulfonic acid blood level, perfluorooctanoic acid blood level, population research, systolic blood pressure, United States	NA	NA	NA	NA
n160	nPM160	32409013	Persistent organic pollutant exposure and celiac disease: A pilot study	Gaylord A, Trasande L, Kannan K, Thomas KM, Lee S, Liu M, Levine J.	Environ Res. 2020 Jul;186:109439. doi: 10.1016/j.envres.2020.109439. Epub 2020 May 11.	Gaylord A	Environ Res	2020	2020-05-16	NA	NA	10.1016/j.envres.2020.109439	TRUE	nEm205	Persistent organic pollutant exposure and celiac disease: A pilot study	NA	Gaylord A., Trasande L., Kannan K., Thomas K.M., Lee S., Liu M., Levine J.	(Gaylord A.; Trasande L.; Liu M.) Department of Population Health, New York University School of Medicine, New York, NY, United States. , (Trasande L.; Levine J., jeremiah.levine@nyulangone.org) Department of Pediatrics, New York University School of Medicine, United States. , (Trasande L.; Liu M.) Department of Environmental Medicine, New York University School of Medicine, New York, NY, United …	J. Levine, Department of Pediatrics, New York University School of Medicine, 160 East 32nd Street, 3rd Floor, New York, NY, United States. Email: jeremiah.levine@nyulangone.org	NA	2020-05-29	2020-08-19	Environmental Research (2020) 186 Article Number: 109439. Date of Publication: 1 Jul 2020	Environmental Research	2020	186	NA	NA	NA	2020-07-01	Article	NA	NA	NA	NA	1096-0953 (electronic),0013-9351	NA	Academic Press Inc., apjcs@harcourt.com	Celiac disease affects approximately 1% of the population worldwide. Little is known about environmental factors that may modulate risk in genetically susceptible populations. Persistent organic pollutants (POPs) are known endocrine disruptors and, given the interplay between the endocrine and immune systems, are plausible contributors to celiac disease. The current study aims to elucidate the as…	Summary: Persistent organic pollutants may influence celiac disease development in conjunction with genetic predisposition. Further research into possible biological pathways is needed.	Autoimmune disease,Children's health,Endocrine disruption,Environmental chemicals,Environmental exposures	NA	2,2',4,4',5,5' hexabromodiphenyl ether (drug toxicity), 4,4' dichlorodiphenyldichloroethylene (drug toxicity), HLA DQ antigen (endogenous compound), perfluorooctanoic acid (drug toxicity), polybrominated diphenyl ether (drug toxicity)	celiac disease (diagnosis, etiology), environmental exposure, persistent organic pollutant	blood analysis, blood level, child, controlled study, duodenum biopsy, female, genetic susceptibility, genotype, human, human tissue, immunotoxicity, major clinical study, male, outpatient department, pilot study, priority journal, scoring system, serology	NA	NA	NA	NA
n161	nPM161	32485599	Perfluoroctanoic acid (PFOA) enhances NOTCH-signaling in an angiogenesis model of placental trophoblast cells	Poteser M, Hutter HP, Moshammer H, Weitensfelder L.	Int J Hyg Environ Health. 2020 Aug;229:113566. doi: 10.1016/j.ijheh.2020.113566. Epub 2020 May 31.	Poteser M	Int J Hyg Environ Health	2020	2020-06-03	NA	NA	10.1016/j.ijheh.2020.113566	TRUE	nEm197	Perfluoroctanoic acid (PFOA) enhances NOTCH-signaling in an angiogenesis model of placental trophoblast cells	NA	Poteser M., Hutter H.-P., Moshammer H., Weitensfelder L.	(Poteser M., michael.poteser@meduniwien.ac.at; Hutter H.-P.; Weitensfelder L.) Medical University of Vienna, ZPH, Dept. of. Environmental Health, Austria. , (Moshammer H.) Medical University of Karakalpakstan, Department of Hygiene, Uzbekistan.	NA	NA	2020-06-10	2021-06-15	International journal of hygiene and environmental health (2020) 229 (113566). Date of Publication: 1 Aug 2020	International journal of hygiene and environmental health	2020	229	NA	113566	NA	2020-08-01	Article	NA	NA	NA	NA	1618-131X (electronic)	NA	NLM (Medline)	Exposure to perfluoroalkyl substances (PFAS) was found to be associated with several pathological endpoints, including high cholesterol levels, specific defective functions of the immune system and reduced birth weight. While environmental PFAS have been recognized as threats for public health, surprisingly little is known about the underlying mechanisms of toxicity. We hypothesized that some of …	NA	Birth weight,Endothelial function,Perfluoroalkyl substances,Perfluoroctanoic acid,Preeclampsia	NA	alkanesulfonic acid (drug toxicity), fluorocarbon (drug toxicity), Notch receptor, octanoic acid derivative (drug toxicity), perfluorooctanesulfonic acid, perfluorooctanoic acid	drug effect, metabolism	angiogenesis, cell line, female, human, physiology, pregnancy, signal transduction, trophoblast	NA	NA	NA	NA
n162	nPM162	32442788	Exposure to per- and polyfluorinated alkyl substances in pregnant Brazilian women and its association with fetal growth	Souza MCO, Saraiva MCP, Honda M, Barbieri MA, Bettiol H, Barbosa F, Kannan K.	Environ Res. 2020 Aug;187:109585. doi: 10.1016/j.envres.2020.109585. Epub 2020 Apr 28.	Souza MCO	Environ Res	2020	2020-05-23	NA	NA	10.1016/j.envres.2020.109585	TRUE	nEm195	Exposure to per- and polyfluorinated alkyl substances in pregnant Brazilian women and its association with fetal growth	NA	Souza M.C.O., Saraiva M.C.P., Honda M., Barbieri M.A., Bettiol H., Barbosa F., Kannan K.	(Souza M.C.O., marilia.cosouza@gmail.com; Barbosa F., fbarbosa@fcfrp.usp.br) LaboratÃ³rio de Toxicologia AnalÃ­tica e de Sistemas, Faculdade de CiÃªncias FarmacÃªuticas de RibeirÃ£o Preto, Universidade de SÃ£o Paulo, RibeirÃ£o Preto, SÃ£o Paulo, Brazil. , (Souza M.C.O., marilia.cosouza@gmail.com; Honda M.; Kannan K., kurunthachalam.kannan@nyulangone.org) Department of Pediatrics and Department of…	F. Barbosa, LaboratÃ³rio de Toxicologia AnalÃ­tica e de Sistemas, Faculdade de CiÃªncias FarmacÃªuticas de RibeirÃ£o Preto, Universidade de SÃ£o Paulo, RibeirÃ£o Preto, SÃ£o Paulo, Brazil. Email: fbarbosa@fcfrp.usp.br	NA	2020-06-03	2020-06-10	Environmental Research (2020) 187 Article Number: 109585. Date of Publication: 1 Aug 2020	Environmental Research	2020	187	NA	NA	NA	2020-08-01	Article	NA	NA	NA	NA	1096-0953 (electronic),0013-9351	NA	Academic Press Inc., apjcs@harcourt.com	Research pertaining to exposure of humans to per- and polyfluorinated alkyl substances (PFASs) has received considerable public and regulatory attention in recent years. Although several studies have reported exposure to PFASs by populations in North America and western Europe, such information is still scarce in Latin America, including Brazil. In this study, concentrations of thirteen PFASs wer…	NA	Birth outcomes,Fetal growth,Human biomonitoring,Perfluoroalkylated,PFOS	alkyl group (drug toxicity), perfluoro compound (drug toxicity)	n ethyl perfluorooctane sulfonamido acetate (drug toxicity), n methyl perfluorooctane sulfonamido acetate (drug toxicity), pefluorodecane sulfonate (drug toxicity), perfluorodecanoic acid (drug toxicity), perfluorododecanoic acid (drug toxicity), perfluoroheptanoic acid (drug toxicity), perfluorohexanesulfonic acid (drug toxicity), perfluorohexanoic acid (drug toxicity), perfluorononanoic acid (d…	fetotoxicity, fetus growth, intrauterine growth retardation, prenatal exposure	adult, article, biological monitoring, birth weight, blood level, blood placenta barrier, blood sampling, Brazilian, case control study, cohort analysis, concentration (parameter), controlled study, female, gestational age, human, live birth, major clinical study, male, maternal smoking, newborn, preeclampsia, pregnancy outcome, pregnant woman, premature labor, priority journal, second trimester …	NA	NA	NA	NA
n163	nPM163	35331797	Associations between prenatal exposure to perfluoroalkyl substances, hypomethylation of MEST imprinted gene and birth outcomes	Ku MS, Pan WC, Huang YT, Hsieh WS, Hsu YH, Chen PC, Liu CY.	Environ Pollut. 2022 Jul 1;304:119183. doi: 10.1016/j.envpol.2022.119183. Epub 2022 Mar 21.	Ku MS	Environ Pollut	2022	2022-03-25	NA	NA	10.1016/j.envpol.2022.119183	TRUE	nEm039	Associations between prenatal exposure to perfluoroalkyl substances, hypomethylation of MEST imprinted gene and birth outcomes	NA	Ku M.-S., Pan W.-C., Huang Y.-T., Hsieh W.-S., Hsu Y.-H., Chen P.-C., Liu C.-Y.	(Ku M.-S.; Chen P.-C.; Liu C.-Y., chenyuliu@ntu.edu.tw) Institute of Environmental and Occupational Health Sciences, College of Public Health, National Taiwan University, Taipei, Taiwan. , (Ku M.-S.; Hsieh W.-S.; Chen P.-C.; Liu C.-Y., chenyuliu@ntu.edu.tw) Department of Public Health, College of Public Health, National Taiwan University, Taipei, Taiwan. , (Pan W.-C.) Institute of Environmental a…	C.-Y. Liu, Institute of Environmental and Occupational Health Science, College of Public Health, National Taiwan University, Address: Room 736, No. 17, Xuzhou Road, Taipei, Taiwan. Email: chenyuliu@ntu.edu.tw	NA	2022-04-06	2022-04-12	Environmental Pollution (2022) 304 Article Number: 119183. Date of Publication: 1 Jul 2022	Environmental Pollution	2022	304	NA	NA	NA	2022-07-01	Article	NA	NA	NA	NA	1873-6424 (electronic),0269-7491	NA	Elsevier Ltd	Prenatal perfluoroalkyl substance (PFAS) exposure has been linked to adverse birth outcomes, but the underlying mechanism has yet to be elucidated. DNA methylation changes in mesoderm-specific transcript (MEST) imprinted gene may be a mechanism of the prenatal exposure effects of PFASs on fetal growth. The aim was to investigate the prenatal PFASs exposure effects on DNA methylation changes in ME…	NA	Birth cohort,DNA methylation,Imprinted gene,MEST,Perfluoroalkyl substances,Prenatal exposure	alkyl group, perfluoroalkyl substance	unclassified drug	DNA methylation, gene, MEST gene, pregnancy outcome, prenatal exposure	adult, article, birth weight, cohort analysis, CpG island, female, fetus growth, genetic association, human, infant, major clinical study, prospective study, sex difference, Taiwan, umbilical cord blood	NA	NA	NA	NA
n164	nPM164	35183668	Serum concentrations of per-/polyfluoroalkyl substances and its association with renal function parameters among teenagers near a Chinese fluorochemical industrial plant: A cross-sectional study	Xie LN, Wang XC, Su LQ, Ji SS, Dong XJ, Zhu HJ, Hou SS, Wang C, Li ZH, Dong B, Zhu Y.	Environ Pollut. 2022 Jun 1;302:119020. doi: 10.1016/j.envpol.2022.119020. Epub 2022 Feb 17.	Xie LN	Environ Pollut	2022	2022-02-20	NA	NA	10.1016/j.envpol.2022.119020	TRUE	nEm044	Serum concentrations of per-/polyfluoroalkyl substances and its association with renal function parameters among teenagers near a Chinese fluorochemical industrial plant: A cross-sectional study	NA	Xie L.-N., Wang X.-C., Su L.-Q., Ji S.-S., Dong X.-J., Zhu H.-J., Hou S.-S., Wang C., Li Z.-H., Dong B., Zhu Y.	(Xie L.-N.; Wang X.-C.; Su L.-Q.; Ji S.-S.; Dong X.-J.; Zhu H.-J.; Hou S.-S.; Li Z.-H.; Dong B.; Zhu Y., zhuying@nieh.chinacdc.cn) China CDC Key Laboratory of Environment and Population Health, National Institute of Environmental Health, Chinese Center for Disease Control and Prevention, Beijing, China. , (Wang C.) State Key Laboratory of Urban and Regional Ecology, Research Center for Eco-Enviro…	Y. Zhu, Analytical Chemistry, National Institute of Environmental Health, Chinese Center for Disease Control and Prevention, Beijing, China. Email: zhuying@nieh.chinacdc.cn	NA	2022-03-14	NA	Environmental Pollution (2022) 302 Article Number: 119020. Date of Publication: 1 Jun 2022	Environmental Pollution	2022	302	NA	NA	NA	2022-06-01	Article	NA	NA	NA	NA	1873-6424 (electronic),0269-7491	NA	Elsevier Ltd	Currently, studies on the association between per-/polyfluoroalkyl substances (PFAS) concentrations and the renal function of residents, especially teenagers, living near fluorochemical industrial plants, are relatively rare, and not all these studies suggested associations. In this cross-sectional study, 775 local teenagers (11â€“15 years old) were included, and serum concentrations of 18 PFAS w…	NA	ACR,CKD,Industrial plant,PFOA,Teenagers	albumin, perfluorooctanoic acid	endogenous compound	chronic kidney failure, creatinine urine level, cross-sectional study, kidney function	adolescent, article, body mass, child, controlled study, estimated glomerular filtration rate, female, gender, household income, human, human tissue, linear regression analysis, male, prevalence, prospective study, resident, sensitivity analysis	NA	NA	NA	NA
n165	nPM165	34220941	Gene Variants Determine Placental Transfer of Perfluoroalkyl Substances (PFAS), Mercury (Hg) and Lead (Pb), and Birth Outcome: Findings From the UmMuKi Bratislava-Vienna Study	Gundacker C, Graf-Rohrmeister K, Gencik M, HengstschlÃ¤ger M, Holoman K, Rosa P, Kroismayr R, Offenthaler I, Plichta V, Reischer T, Teufl I, Raffesberg W, Scharf S, KÃ¶hler-Vallant B, Delissen Z, WeiÃŸ S, Uhl M.	Front Genet. 2021 Jun 16;12:664946. doi: 10.3389/fgene.2021.664946. eCollection 2021.	Gundacker C	Front Genet	2021	2021-07-05	PMC8242356	NA	10.3389/fgene.2021.664946	TRUE	nEm120	Gene Variants Determine Placental Transfer of Perfluoroalkyl Substances (PFAS), Mercury (Hg) and Lead (Pb), and Birth Outcome: Findings From the UmMuKi Bratislava-Vienna Study	NA	Gundacker C., Graf-Rohrmeister K., Gencik M., HengstschlÃ¤ger M., Holoman K., Rosa P., Kroismayr R., Offenthaler I., Plichta V., Reischer T., Teufl I., Raffesberg W., Scharf S., KÃ¶hler-Vallant B., Delissen Z., WeiÃŸ S., Uhl M.	(Gundacker C., claudia.gundacker@meduniwien.ac.at; HengstschlÃ¤ger M.; Plichta V.; Reischer T.; Teufl I.; Delissen Z.) Institute of Medical Genetics, Medical University of Vienna, Vienna, Austria. , (Graf-Rohrmeister K.) Semmelweis Frauenklinik, Vienna, Austria. , (Graf-Rohrmeister K.) Klinik Floridsdorf, Vienna, Austria. , (Gencik M.; Delissen Z.) Medgene, Bratislava, Slovakia. , (Holoman K.; Ro…	C. Gundacker, Institute of Medical Genetics, Medical University of Vienna, Vienna, Austria. Email: claudia.gundacker@meduniwien.ac.at	NA	2021-07-09	2021-08-24	Frontiers in Genetics (2021) 12 Article Number: 664946. Date of Publication: 16 Jun 2021	Frontiers in Genetics	2021	12	NA	NA	NA	2021-06-16	Article	NA	NA	NA	NA	1664-8021 (electronic)	NA	Frontiers Media S.A.	Prenatal exposure to perfluoroalkyl substances (PFAS), bisphenol A (BPA), lead (Pb), total mercury (THg), and methylmercury (MeHg) can affect fetal development. Factors influencing placental transfer rate of these toxins are poorly investigated. Whether prenatal exposure to pollutants has an effect on birth weight is incompletely understood. We therefore aimed (1) to determine placental transfer …	NA	birth outcome,Bisphenol a (BPA),genotype-phenotype,lead (Pb),Mercury (Hg),perfluoroalkyl substances (PFAS),placental transfer	chemical agent, lead, mercury, polyfluoroalkyl substance	4,4' isopropylidenediphenol, acetonitrile, atp binding cassette subfamily c member 1 (endogenous compound), breast cancer resistance protein (endogenous compound), glutathione, glutathione transferase P1, glutathione transferase T1, hydrochloric acid, mercaptoethanol, methanol, methylmercury, perfluorooctanoic acid, polyethylene, porphobilinogen synthase (endogenous compound), protein (endogenous…	genetic variability, placental transfer	adult, alcohol consumption, article, blood collection tube, chemical analyzer, child, controlled study, detoxification, diagnostic kit, DNA extraction, DNA extraction kit, education, electrospray, female, fetus development, filter, gene deletion, gene expression, gene frequency, genotype, gestational age, head circumference, human, inductively coupled plasma mass spectrometry, Infinity 1290, limi…	NA	NA	Infinity 1290 (Agilent, United States), MDS SCIEX 4000 (Applied Biosystems), StepOne (Life Technologies), vacuette, Z 8200 (Hitachi)	Agilent (United States), Applied Biosystems, Hitachi, Life Technologies, Machery-Nagel, Sequenom
n166	nPM166	32179316	Using methylome data to inform exposome-health association studies: An application to the identification of environmental drivers of child body mass index	Cadiou S, Bustamante M, Agier L, Andrusaityte S, BasagaÃ±a X, Carracedo A, Chatzi L, Grazuleviciene R, Gonzalez JR, Gutzkow KB, Maitre L, Mason D, Millot F, Nieuwenhuijsen M, Papadopoulou E, Santorelli G, Saulnier PJ, Vives M, Wright J, Vrijheid M, Slama R.	Environ Int. 2020 May;138:105622. doi: 10.1016/j.envint.2020.105622. Epub 2020 Mar 14.	Cadiou S	Environ Int	2020	2020-03-18	PMC8713647	NIHMS1759252	10.1016/j.envint.2020.105622	TRUE	nEm211	Using methylome data to inform exposome-health association studies: An application to the identification of environmental drivers of child body mass index	NA	Cadiou S., Bustamante M., Agier L., Andrusaityte S., BasagaÃ±a X., Carracedo A., Chatzi L., Grazuleviciene R., Gonzalez J.R., Gutzkow K.B., Maitre L., Mason D., Millot F., Nieuwenhuijsen M., Papadopoulou E., Santorelli G., Saulnier P.-J., Vives M., Wright J., Vrijheid M., Slama R.	(Cadiou S.; Agier L.; Slama R., Remy.slama@univ-grenoble-alpes.fr) Team of Environmental Epidemiology, IAB, Institute for Advanced Biosciences, Inserm, CNRS, CHU-Grenoble-Alpes, University Grenoble-Alpes, Grenoble, France. , (Bustamante M.; BasagaÃ±a X.; Gonzalez J.R.; Maitre L.; Nieuwenhuijsen M.; Vrijheid M.) ISGlobal, Barcelona Institute for Global Health, Barcelona, Spain. , (Bustamante M.; B…	R. Slama, Team of environmental epidemiology, IAB, Institute for Advanced Biosciences, Inserm, CNRS, CHU-Grenoble-Alpes, University Grenoble-Alpes, AllÃ©e de Alpes, Grenoble, France. Email: Remy.slama@univ-grenoble-alpes.fr	NA	NA	2020-03-25	Environment International (2020) 138 Article Number: 105622. Date of Publication: 1 May 2020	Environment International	2020	138	NA	NA	NA	2020-05-01	Article	NA	NA	NA	NA	1873-6750 (electronic),0160-4120	NA	Elsevier Ltd	Background: The exposome is defined as encompassing all environmental exposures one undergoes from conception onwards. Challenges of the application of this concept to environmental-health association studies include a possibly high false-positive rate. Objectives: We aimed to reduce the dimension of the exposome using information from DNA methylation as a way to more efficiently characterize the…	NA	Biological a priori,Child body mass index â€“ exposome,dimension reduction â€“ DNA methylation,Reverse causality	NA	NA	body mass, dimensionality reduction, DNA methylation, exposome, methylome	Agnostic, article, blood level, child, cohort analysis, controlled study, female, human, human tissue, immunocompetent cell, linear regression analysis, major clinical study, pollutant, preschool child, sensitivity and specificity	NA	NA	NA	NA
n167	nPM167	25543169	Developmental toxicity of perfluorononanoic acid in mice	Das KP, Grey BE, Rosen MB, Wood CR, Tatum-Gibbs KR, Zehr RD, Strynar MJ, Lindstrom AB, Lau C.	Reprod Toxicol. 2015 Jan;51:133-44. doi: 10.1016/j.reprotox.2014.12.012. Epub 2014 Dec 25.	Das KP	Reprod Toxicol	2015	2014-12-29	NA	NA	10.1016/j.reprotox.2014.12.012	TRUE	nEm484	Developmental toxicity of perfluorononanoic acid in mice	NA	Das K.P., Grey B.E., Rosen M.B., Wood C.R., Tatum-Gibbs K.R., Zehr R.D., Strynar M.J., Lindstrom A.B., Lau C.	(Das K.P.; Grey B.E.; Wood C.R.; Tatum-Gibbs K.R.; Lau C., lau.christopher@epa.gov) Toxicity Assessment Division, United States. , (Rosen M.B.) Integrated Systems Toxicology Division, United States. , (Zehr R.D.) Research Core Unit, National Health and Environmental Effects Research Laboratory, United States. , (Strynar M.J.; Lindstrom A.B.) Human Exposure and Atmospheric Sciences Division, Natio…	C. Lau, U.S. Environmental Protection Agency, Research Triangle Park Mail Drop B105-04, NC, United States.	NA	2015-02-20	2015-02-24	Reproductive Toxicology (2015) 51 (133-144). Date of Publication: 1 Jan 2015	Reproductive Toxicology	2015	51	NA	133	144	2015-01-01	Article	NA	NA	NA	NA	1873-1708 (electronic),0890-6238	NA	Elsevier Inc., usjcs@elsevier.com	Perfluorononanoic acid (PFNA) is a ubiquitous and persistent environmental contaminant. Although its levels in the environment and in humans are lower than those of perfluorooctane sulfonate (PFOS) or perfluorooctanoic acid (PFOA), a steady trend of increases in the general population in recent years has drawn considerable interest and concern. Previous studies with PFOS and PFOA have indicated d…	NA	CD-1 mice,Developmental toxicity,Gene expression,Perfluorononanoic acid	perfluorononanoic acid (drug toxicity)	perfluorooctanesulfonic acid (endogenous compound), perfluorooctanoic acid (endogenous compound), peroxisome proliferator activated receptor alpha (endogenous compound)	developmental toxicity	adulthood, animal experiment, animal model, animal tissue, article, controlled study, female, fetal well being, fetus, fetus weight, gene activation, gene expression, gene targeting, gestation period, hepatomegaly, histopathology, liver weight, male, mouse, newborn, newborn death, nonhuman, perinatal period, pregnancy outcome, progeny, puberty, survival, visual system function	NA	NA	NA	NA
n168	nPM168	29842821	Maternal exposure to endocrine disruptors and placental transmission: a pilot study	Caserta D, Pegoraro S, Mallozzi M, Di Benedetto L, Colicino E, Lionetto L, Simmaco M.	Gynecol Endocrinol. 2018 Nov;34(11):1001-1004. doi: 10.1080/09513590.2018.1473362. Epub 2018 May 29.	Caserta D	Gynecol Endocrinol	2018	2018-05-30	NA	NA	10.1080/09513590.2018.1473362	TRUE	nEm320	Maternal exposure to endocrine disruptors and placental transmission: a pilot study	NA	Caserta D., Pegoraro S., Mallozzi M., Di Benedetto L., Colicino E., Lionetto L., Simmaco M.	(Caserta D., donatella.caserta@uniroma1.it; Pegoraro S.; Mallozzi M.; Di Benedetto L.) Department of Surgical and Medical Sciences and Translational Medicine, Sapienza University of Rome, S. Andrea Hospital, Rome, Italy. , (Colicino E.) Department of Environmental Health Sciences, Mailman School of Public Healh, Columbia Univeristy Medical College, New York, NY, United States. , (Lionetto L.) DiM…	D. Caserta, Department of Surgical and Medical Sciences and Translational Medicine, Sapienza University of Rome, S. Andrea Hospital, via di Grottarossa, Rome, Italy. Email: donatella.caserta@uniroma1.it	NA	2018-06-08	2019-03-29	Gynecological Endocrinology (2018) 34:11 (1001-1004). Date of Publication: 2 Nov 2018	Gynecological Endocrinology	2018	34	11	1001	1004	2018-11-02	Article	NA	NA	NA	NA	1473-0766 (electronic),0951-3590	NA	Taylor and Francis Ltd	Endocrine disruptors (EDs) are known to affect maternal and child health. The objective of our study was to identify the association between some of the most important endocrine-disruptive substances (perfluorooctane sulfonate [PFOS], perfluorooctanoic acid [PFOA], di2-ethylhexyl-phthalate [DEHP] and mono2-ethylhexyl-phthalate [MEHP]) and both pregnancy variability and birth outcomes. We measured…	NA	Endocrine disruptors,maternal exposure,placental transmission	perfluorooctanesulfonic acid, perfluorooctanoic acid, phthalic acid 2 ethylhexyl monoester, phthalic acid bis(2 ethylhexyl) ester	NA	maternal exposure, placental transfer	adult, alcoholic beverage, article, birth weight, clinical article, concentration (parameter), controlled study, disease association, female, food intake, gestation period, human, maternal blood, newborn, pilot study, pregnancy outcome, pregnant woman, prenatal exposure, priority journal, smoking habit	NA	NA	NA	NA
[truncated: 659 more rows]
[truncated: 57 more columns]
