# Supplementary material for: Prenatal and childhood exposure to per-/polyfluoroalkyl substances (PFASs) and its associations with childhood overweight and/or obesity: a systematic review with meta-analyses
Source: Environ Health. 2023 Aug 14;22:56. doi: 10.1186/s12940-023-01006-6 (PMC10424367; doi:10.1186/s12940-023-01006-6)
Supplement: Supplementary file 8 — Additional file 8: Supplementary Table S06. Results of the meta-analyses performed with the generic invariance method (“inv_var”) and weighting by sample size (“wgtd”). The I2 as a measure of heterogeneity is also reported. Both the original meta-analyses are reported together with the sensitivity meta-analyses repeated by excluding one sample per time [file 12940_2023_1006_MOESM8_ESM.xlsx]

## Sheet: Table_all_summary_estimates
META	studies	study_removed	estim_inv_var	CI95_lower_inv_var	CI95_upper_inv_var	I2	estim_subj_wgtd	CI95_lower_subj_wgtd	CI95_upper_subj_wgtd
PFOA_prenatal_BMI_both_sexes	Zhang, Lei, et al., 2022; Bloom et al., 2022; Lauritzen et al., 2018; Gyllenhammar et al., 2018; Zhang, Pan, et al., 2022; Sevelsted et al., 2022; Liu et al., 2020; Mora et al., 2017; Jensen et al., 2020; Chen et al., 2019; Chen et al., 2017; Andersen et al., 2010; Karlsen et al., 2017; Yeung et al., 2019; Manzano-Salgado et al., 2017; Hoyer et al., 2015 - Greenland; Hoyer et al., 2015 - Ukraine;…	NONE	-0.0015321	-0.0111824	0.00811815	0.576565	0.00989052	-0.00305601	0.0228371
PFOA_prenatal_BMI_both_sexes	Bloom et al., 2022; Lauritzen et al., 2018; Gyllenhammar et al., 2018; Zhang, Pan, et al., 2022; Sevelsted et al., 2022; Liu et al., 2020; Mora et al., 2017; Jensen et al., 2020; Chen et al., 2019; Chen et al., 2017; Andersen et al., 2010; Karlsen et al., 2017; Yeung et al., 2019; Manzano-Salgado et al., 2017; Hoyer et al., 2015 - Greenland; Hoyer et al., 2015 - Ukraine; Vrijheid et al., 2020	Zhang, Lei, et al., 2022	-0.000491671	-0.0123214	0.0113381	0.597901	0.0188136	0.0013376	0.0362897
PFOA_prenatal_BMI_both_sexes	Zhang, Lei, et al., 2022; Lauritzen et al., 2018; Gyllenhammar et al., 2018; Zhang, Pan, et al., 2022; Sevelsted et al., 2022; Liu et al., 2020; Mora et al., 2017; Jensen et al., 2020; Chen et al., 2019; Chen et al., 2017; Andersen et al., 2010; Karlsen et al., 2017; Yeung et al., 2019; Manzano-Salgado et al., 2017; Hoyer et al., 2015 - Greenland; Hoyer et al., 2015 - Ukraine; Vrijheid et al., 20…	Bloom et al., 2022	9.13505e-05	-0.0110231	0.0112058	0.592567	0.0198789	0.0028736	0.0368843
PFOA_prenatal_BMI_both_sexes	Zhang, Lei, et al., 2022; Bloom et al., 2022; Gyllenhammar et al., 2018; Zhang, Pan, et al., 2022; Sevelsted et al., 2022; Liu et al., 2020; Mora et al., 2017; Jensen et al., 2020; Chen et al., 2019; Chen et al., 2017; Andersen et al., 2010; Karlsen et al., 2017; Yeung et al., 2019; Manzano-Salgado et al., 2017; Hoyer et al., 2015 - Greenland; Hoyer et al., 2015 - Ukraine; Vrijheid et al., 2020	Lauritzen et al., 2018	-0.00247912	-0.0118621	0.00690383	0.571366	0.0151401	-0.00106655	0.0313467
PFOA_prenatal_BMI_both_sexes	Zhang, Lei, et al., 2022; Bloom et al., 2022; Lauritzen et al., 2018; Zhang, Pan, et al., 2022; Sevelsted et al., 2022; Liu et al., 2020; Mora et al., 2017; Jensen et al., 2020; Chen et al., 2019; Chen et al., 2017; Andersen et al., 2010; Karlsen et al., 2017; Yeung et al., 2019; Manzano-Salgado et al., 2017; Hoyer et al., 2015 - Greenland; Hoyer et al., 2015 - Ukraine; Vrijheid et al., 2020	Gyllenhammar et al., 2018	-0.00215772	-0.0116117	0.00729621	0.576823	0.015342	-0.000651336	0.0313353
PFOA_prenatal_BMI_both_sexes	Zhang, Lei, et al., 2022; Bloom et al., 2022; Lauritzen et al., 2018; Gyllenhammar et al., 2018; Sevelsted et al., 2022; Liu et al., 2020; Mora et al., 2017; Jensen et al., 2020; Chen et al., 2019; Chen et al., 2017; Andersen et al., 2010; Karlsen et al., 2017; Yeung et al., 2019; Manzano-Salgado et al., 2017; Hoyer et al., 2015 - Greenland; Hoyer et al., 2015 - Ukraine; Vrijheid et al., 2020	Zhang, Pan, et al., 2022	0.000256226	-0.0114796	0.0119921	0.583521	0.0210606	0.00308751	0.0390336
PFOA_prenatal_BMI_both_sexes	Zhang, Lei, et al., 2022; Bloom et al., 2022; Lauritzen et al., 2018; Gyllenhammar et al., 2018; Zhang, Pan, et al., 2022; Liu et al., 2020; Mora et al., 2017; Jensen et al., 2020; Chen et al., 2019; Chen et al., 2017; Andersen et al., 2010; Karlsen et al., 2017; Yeung et al., 2019; Manzano-Salgado et al., 2017; Hoyer et al., 2015 - Greenland; Hoyer et al., 2015 - Ukraine; Vrijheid et al., 2020	Sevelsted et al., 2022	-0.00225393	-0.0115767	0.00706879	0.559324	0.00972767	-0.00433664	0.023792
PFOA_prenatal_BMI_both_sexes	Zhang, Lei, et al., 2022; Bloom et al., 2022; Lauritzen et al., 2018; Gyllenhammar et al., 2018; Zhang, Pan, et al., 2022; Sevelsted et al., 2022; Mora et al., 2017; Jensen et al., 2020; Chen et al., 2019; Chen et al., 2017; Andersen et al., 2010; Karlsen et al., 2017; Yeung et al., 2019; Manzano-Salgado et al., 2017; Hoyer et al., 2015 - Greenland; Hoyer et al., 2015 - Ukraine; Vrijheid et al., …	Liu et al., 2020	-0.000803038	-0.0111039	0.00949781	0.599145	0.0192061	0.00265453	0.0357577
PFOA_prenatal_BMI_both_sexes	Zhang, Lei, et al., 2022; Bloom et al., 2022; Lauritzen et al., 2018; Gyllenhammar et al., 2018; Zhang, Pan, et al., 2022; Sevelsted et al., 2022; Liu et al., 2020; Jensen et al., 2020; Chen et al., 2019; Chen et al., 2017; Andersen et al., 2010; Karlsen et al., 2017; Yeung et al., 2019; Manzano-Salgado et al., 2017; Hoyer et al., 2015 - Greenland; Hoyer et al., 2015 - Ukraine; Vrijheid et al., 2…	Mora et al., 2017	-0.00315821	-0.012882	0.00656555	0.586081	0.0185487	0.00141361	0.0356837
PFOA_prenatal_BMI_both_sexes	Zhang, Lei, et al., 2022; Bloom et al., 2022; Lauritzen et al., 2018; Gyllenhammar et al., 2018; Zhang, Pan, et al., 2022; Sevelsted et al., 2022; Liu et al., 2020; Mora et al., 2017; Chen et al., 2019; Chen et al., 2017; Andersen et al., 2010; Karlsen et al., 2017; Yeung et al., 2019; Manzano-Salgado et al., 2017; Hoyer et al., 2015 - Greenland; Hoyer et al., 2015 - Ukraine; Vrijheid et al., 2020	Jensen et al., 2020	-0.00288683	-0.0121522	0.00637857	0.580268	0.0170216	0.000301272	0.0337419
PFOA_prenatal_BMI_both_sexes	Zhang, Lei, et al., 2022; Bloom et al., 2022; Lauritzen et al., 2018; Gyllenhammar et al., 2018; Zhang, Pan, et al., 2022; Sevelsted et al., 2022; Liu et al., 2020; Mora et al., 2017; Jensen et al., 2020; Chen et al., 2017; Andersen et al., 2010; Karlsen et al., 2017; Yeung et al., 2019; Manzano-Salgado et al., 2017; Hoyer et al., 2015 - Greenland; Hoyer et al., 2015 - Ukraine; Vrijheid et al., 2…	Chen et al., 2019	-0.000533648	-0.0123537	0.0112864	0.594537	0.0190487	0.00136833	0.0367291
PFOA_prenatal_BMI_both_sexes	Zhang, Lei, et al., 2022; Bloom et al., 2022; Lauritzen et al., 2018; Gyllenhammar et al., 2018; Zhang, Pan, et al., 2022; Sevelsted et al., 2022; Liu et al., 2020; Mora et al., 2017; Jensen et al., 2020; Chen et al., 2019; Andersen et al., 2010; Karlsen et al., 2017; Yeung et al., 2019; Manzano-Salgado et al., 2017; Hoyer et al., 2015 - Greenland; Hoyer et al., 2015 - Ukraine; Vrijheid et al., 2…	Chen et al., 2017	-0.00159671	-0.011378	0.00818455	0.600854	0.0184873	0.00228293	0.0346918
PFOA_prenatal_BMI_both_sexes	Zhang, Lei, et al., 2022; Bloom et al., 2022; Lauritzen et al., 2018; Gyllenhammar et al., 2018; Zhang, Pan, et al., 2022; Sevelsted et al., 2022; Liu et al., 2020; Mora et al., 2017; Jensen et al., 2020; Chen et al., 2019; Chen et al., 2017; Karlsen et al., 2017; Yeung et al., 2019; Manzano-Salgado et al., 2017; Hoyer et al., 2015 - Greenland; Hoyer et al., 2015 - Ukraine; Vrijheid et al., 2020	Andersen et al., 2010	3.92075e-05	-0.000257412	0.000335827	0.559166	0.0214356	0.0042381	0.038633
PFOA_prenatal_BMI_both_sexes	Zhang, Lei, et al., 2022; Bloom et al., 2022; Lauritzen et al., 2018; Gyllenhammar et al., 2018; Zhang, Pan, et al., 2022; Sevelsted et al., 2022; Liu et al., 2020; Mora et al., 2017; Jensen et al., 2020; Chen et al., 2019; Chen et al., 2017; Andersen et al., 2010; Yeung et al., 2019; Manzano-Salgado et al., 2017; Hoyer et al., 2015 - Greenland; Hoyer et al., 2015 - Ukraine; Vrijheid et al., 2020	Karlsen et al., 2017	-0.00372013	-0.0125067	0.00506641	0.564641	0.0173951	0.000682988	0.0341072
PFOA_prenatal_BMI_both_sexes	Zhang, Lei, et al., 2022; Bloom et al., 2022; Lauritzen et al., 2018; Gyllenhammar et al., 2018; Zhang, Pan, et al., 2022; Sevelsted et al., 2022; Liu et al., 2020; Mora et al., 2017; Jensen et al., 2020; Chen et al., 2019; Chen et al., 2017; Andersen et al., 2010; Karlsen et al., 2017; Manzano-Salgado et al., 2017; Hoyer et al., 2015 - Greenland; Hoyer et al., 2015 - Ukraine; Vrijheid et al., 20…	Yeung et al., 2019	-5.16503e-05	-0.00106771	0.000964413	0.35339	0.0235196	0.00585899	0.0411803
PFOA_prenatal_BMI_both_sexes	Zhang, Lei, et al., 2022; Bloom et al., 2022; Lauritzen et al., 2018; Gyllenhammar et al., 2018; Zhang, Pan, et al., 2022; Sevelsted et al., 2022; Liu et al., 2020; Mora et al., 2017; Jensen et al., 2020; Chen et al., 2019; Chen et al., 2017; Andersen et al., 2010; Karlsen et al., 2017; Yeung et al., 2019; Hoyer et al., 2015 - Greenland; Hoyer et al., 2015 - Ukraine; Vrijheid et al., 2020	Manzano-Salgado et al., 2017	-0.00191007	-0.0118027	0.00798259	0.59835	0.018436	0.00160521	0.0352668
PFOA_prenatal_BMI_both_sexes	Zhang, Lei, et al., 2022; Bloom et al., 2022; Lauritzen et al., 2018; Gyllenhammar et al., 2018; Zhang, Pan, et al., 2022; Sevelsted et al., 2022; Liu et al., 2020; Mora et al., 2017; Jensen et al., 2020; Chen et al., 2019; Chen et al., 2017; Andersen et al., 2010; Karlsen et al., 2017; Yeung et al., 2019; Manzano-Salgado et al., 2017; Hoyer et al., 2015 - Ukraine; Vrijheid et al., 2020	Hoyer et al., 2015 - Greenland	-0.00193084	-0.0115449	0.00768324	0.594259	0.0166401	0.000750985	0.0325291
PFOA_prenatal_BMI_both_sexes	Zhang, Lei, et al., 2022; Bloom et al., 2022; Lauritzen et al., 2018; Gyllenhammar et al., 2018; Zhang, Pan, et al., 2022; Sevelsted et al., 2022; Liu et al., 2020; Mora et al., 2017; Jensen et al., 2020; Chen et al., 2019; Chen et al., 2017; Andersen et al., 2010; Karlsen et al., 2017; Yeung et al., 2019; Manzano-Salgado et al., 2017; Hoyer et al., 2015 - Greenland; Vrijheid et al., 2020	Hoyer et al., 2015 - Ukraine	-0.00155952	-0.011284	0.00816493	0.601128	0.0184473	0.00319347	0.0337011
PFOA_prenatal_BMI_both_sexes	Zhang, Lei, et al., 2022; Bloom et al., 2022; Lauritzen et al., 2018; Gyllenhammar et al., 2018; Zhang, Pan, et al., 2022; Sevelsted et al., 2022; Liu et al., 2020; Mora et al., 2017; Jensen et al., 2020; Chen et al., 2019; Chen et al., 2017; Andersen et al., 2010; Karlsen et al., 2017; Yeung et al., 2019; Manzano-Salgado et al., 2017; Hoyer et al., 2015 - Greenland; Hoyer et al., 2015 - Ukraine	Vrijheid et al., 2020	-0.000125721	-0.0111013	0.0108499	0.595817	0.0205644	0.00322911	0.0378997
PFOA_prenatal_BMI_boys	Romano et al., 2022; Zhang, Lei, et al., 2022; Bloom et al., 2022; Zhang, Pan, et al., 2022; Liu et al., 2020; Andersen et al., 2013; Mora et al., 2017; Jensen et al., 2020; Chen et al., 2019; Chen et al., 2017; Yeung et al., 2019; Manzano-Salgado et al., 2017	NONE	-0.000260315	-0.00097367	0.000453041	0.00116261	-0.00808789	-0.0229265	0.00675074
PFOA_prenatal_BMI_boys	Zhang, Lei, et al., 2022; Bloom et al., 2022; Zhang, Pan, et al., 2022; Liu et al., 2020; Andersen et al., 2013; Mora et al., 2017; Jensen et al., 2020; Chen et al., 2019; Chen et al., 2017; Yeung et al., 2019; Manzano-Salgado et al., 2017	Romano et al., 2022	-0.00012568	-0.000966235	0.000714875	0.0160082	-0.00890558	-0.0270527	0.0092415
PFOA_prenatal_BMI_boys	Romano et al., 2022; Bloom et al., 2022; Zhang, Pan, et al., 2022; Liu et al., 2020; Andersen et al., 2013; Mora et al., 2017; Jensen et al., 2020; Chen et al., 2019; Chen et al., 2017; Yeung et al., 2019; Manzano-Salgado et al., 2017	Zhang, Lei, et al., 2022	-0.000204144	-0.00115934	0.000751049	0.0426159	-0.00876492	-0.0265929	0.00906301
PFOA_prenatal_BMI_boys	Romano et al., 2022; Zhang, Lei, et al., 2022; Zhang, Pan, et al., 2022; Liu et al., 2020; Andersen et al., 2013; Mora et al., 2017; Jensen et al., 2020; Chen et al., 2019; Chen et al., 2017; Yeung et al., 2019; Manzano-Salgado et al., 2017	Bloom et al., 2022	-0.000252154	-0.000962913	0.000458604	0.0286016	-0.00791971	-0.0262184	0.010379
PFOA_prenatal_BMI_boys	Romano et al., 2022; Zhang, Lei, et al., 2022; Bloom et al., 2022; Liu et al., 2020; Andersen et al., 2013; Mora et al., 2017; Jensen et al., 2020; Chen et al., 2019; Chen et al., 2017; Yeung et al., 2019; Manzano-Salgado et al., 2017	Zhang, Pan, et al., 2022	-0.000220908	-0.00092247	0.000480655	0	-0.00886175	-0.0288651	0.0111416
PFOA_prenatal_BMI_boys	Romano et al., 2022; Zhang, Lei, et al., 2022; Bloom et al., 2022; Zhang, Pan, et al., 2022; Andersen et al., 2013; Mora et al., 2017; Jensen et al., 2020; Chen et al., 2019; Chen et al., 2017; Yeung et al., 2019; Manzano-Salgado et al., 2017	Liu et al., 2020	-0.000255955	-0.000967837	0.000455926	0	-0.00699838	-0.0244707	0.010474
PFOA_prenatal_BMI_boys	Romano et al., 2022; Zhang, Lei, et al., 2022; Bloom et al., 2022; Zhang, Pan, et al., 2022; Liu et al., 2020; Mora et al., 2017; Jensen et al., 2020; Chen et al., 2019; Chen et al., 2017; Yeung et al., 2019; Manzano-Salgado et al., 2017	Andersen et al., 2013	-0.000249886	-0.000959697	0.000459925	0	-0.00634635	-0.0245651	0.0118724
PFOA_prenatal_BMI_boys	Romano et al., 2022; Zhang, Lei, et al., 2022; Bloom et al., 2022; Zhang, Pan, et al., 2022; Liu et al., 2020; Andersen et al., 2013; Jensen et al., 2020; Chen et al., 2019; Chen et al., 2017; Yeung et al., 2019; Manzano-Salgado et al., 2017	Mora et al., 2017	-0.000254757	-0.000966416	0.000456902	0.0593601	-0.00814977	-0.0265831	0.0102835
PFOA_prenatal_BMI_boys	Romano et al., 2022; Zhang, Lei, et al., 2022; Bloom et al., 2022; Zhang, Pan, et al., 2022; Liu et al., 2020; Andersen et al., 2013; Mora et al., 2017; Chen et al., 2019; Chen et al., 2017; Yeung et al., 2019; Manzano-Salgado et al., 2017	Jensen et al., 2020	-0.000263604	-0.000978141	0.000450933	0.0376722	-0.0116057	-0.0289558	0.00574444
PFOA_prenatal_BMI_boys	Romano et al., 2022; Zhang, Lei, et al., 2022; Bloom et al., 2022; Zhang, Pan, et al., 2022; Liu et al., 2020; Andersen et al., 2013; Mora et al., 2017; Jensen et al., 2020; Chen et al., 2017; Yeung et al., 2019; Manzano-Salgado et al., 2017	Chen et al., 2019	-0.000656395	-0.00143709	0.000124296	0	-0.00897352	-0.027132	0.00918491
PFOA_prenatal_BMI_boys	Romano et al., 2022; Zhang, Lei, et al., 2022; Bloom et al., 2022; Zhang, Pan, et al., 2022; Liu et al., 2020; Andersen et al., 2013; Mora et al., 2017; Jensen et al., 2020; Chen et al., 2019; Yeung et al., 2019; Manzano-Salgado et al., 2017	Chen et al., 2017	-0.000259638	-0.000972768	0.000453493	0.0798631	-0.00663219	-0.0203143	0.00704988
PFOA_prenatal_BMI_boys	Romano et al., 2022; Zhang, Lei, et al., 2022; Bloom et al., 2022; Zhang, Pan, et al., 2022; Liu et al., 2020; Andersen et al., 2013; Mora et al., 2017; Jensen et al., 2020; Chen et al., 2019; Chen et al., 2017; Manzano-Salgado et al., 2017	Yeung et al., 2019	-0.000241669	-0.000948777	0.000465439	0	-0.0070904	-0.0264363	0.0122555
PFOA_prenatal_BMI_boys	Romano et al., 2022; Zhang, Lei, et al., 2022; Bloom et al., 2022; Zhang, Pan, et al., 2022; Liu et al., 2020; Andersen et al., 2013; Mora et al., 2017; Jensen et al., 2020; Chen et al., 2019; Chen et al., 2017; Yeung et al., 2019	Manzano-Salgado et al., 2017	-0.000261158	-0.000974843	0.000452527	0.0874206	-0.0105131	-0.0266479	0.00562178
PFOA_prenatal_BMI_girls	Romano et al., 2022; Zhang, Lei, et al., 2022; Bloom et al., 2022; Zhang, Pan, et al., 2022; Hartman et al., 2017; Liu et al., 2020; Andersen et al., 2013; Mora et al., 2017; Jensen et al., 2020; Chen et al., 2019; Chen et al., 2017; Yeung et al., 2019; Manzano-Salgado et al., 2017	NONE	4.99078e-05	-0.000111992	0.000211807	0.655883	0.00148936	-0.0104105	0.0133892
PFOA_prenatal_BMI_girls	Zhang, Lei, et al., 2022; Bloom et al., 2022; Zhang, Pan, et al., 2022; Hartman et al., 2017; Liu et al., 2020; Andersen et al., 2013; Mora et al., 2017; Jensen et al., 2020; Chen et al., 2019; Chen et al., 2017; Yeung et al., 2019; Manzano-Salgado et al., 2017	Romano et al., 2022	-0.000887894	-0.0137291	0.0119533	0.673715	0.00560645	-0.00792944	0.0191423
PFOA_prenatal_BMI_girls	Romano et al., 2022; Bloom et al., 2022; Zhang, Pan, et al., 2022; Hartman et al., 2017; Liu et al., 2020; Andersen et al., 2013; Mora et al., 2017; Jensen et al., 2020; Chen et al., 2019; Chen et al., 2017; Yeung et al., 2019; Manzano-Salgado et al., 2017	Zhang, Lei, et al., 2022	-0.000347657	-0.0133952	0.0126999	0.681275	0.00571591	-0.00821093	0.0196428
PFOA_prenatal_BMI_girls	Romano et al., 2022; Zhang, Lei, et al., 2022; Zhang, Pan, et al., 2022; Hartman et al., 2017; Liu et al., 2020; Andersen et al., 2013; Mora et al., 2017; Jensen et al., 2020; Chen et al., 2019; Chen et al., 2017; Yeung et al., 2019; Manzano-Salgado et al., 2017	Bloom et al., 2022	5.01798e-05	-0.000111723	0.000212082	0.68166	0.0065552	-0.00700578	0.0201162
PFOA_prenatal_BMI_girls	Romano et al., 2022; Zhang, Lei, et al., 2022; Bloom et al., 2022; Hartman et al., 2017; Liu et al., 2020; Andersen et al., 2013; Mora et al., 2017; Jensen et al., 2020; Chen et al., 2019; Chen et al., 2017; Yeung et al., 2019; Manzano-Salgado et al., 2017	Zhang, Pan, et al., 2022	4.70684e-05	-0.000114862	0.000208999	0.654096	0.00517189	-0.00957386	0.0199176
PFOA_prenatal_BMI_girls	Romano et al., 2022; Zhang, Lei, et al., 2022; Bloom et al., 2022; Zhang, Pan, et al., 2022; Liu et al., 2020; Andersen et al., 2013; Mora et al., 2017; Jensen et al., 2020; Chen et al., 2019; Chen et al., 2017; Yeung et al., 2019; Manzano-Salgado et al., 2017	Hartman et al., 2017	5.33382e-05	-0.000108597	0.000215274	0.644917	0.00652325	-0.00718738	0.0202339
PFOA_prenatal_BMI_girls	Romano et al., 2022; Zhang, Lei, et al., 2022; Bloom et al., 2022; Zhang, Pan, et al., 2022; Hartman et al., 2017; Andersen et al., 2013; Mora et al., 2017; Jensen et al., 2020; Chen et al., 2019; Chen et al., 2017; Yeung et al., 2019; Manzano-Salgado et al., 2017	Liu et al., 2020	4.98055e-05	-0.000112095	0.000211706	0.682791	0.00514012	-0.00790628	0.0181865
PFOA_prenatal_BMI_girls	Romano et al., 2022; Zhang, Lei, et al., 2022; Bloom et al., 2022; Zhang, Pan, et al., 2022; Hartman et al., 2017; Liu et al., 2020; Mora et al., 2017; Jensen et al., 2020; Chen et al., 2019; Chen et al., 2017; Yeung et al., 2019; Manzano-Salgado et al., 2017	Andersen et al., 2013	5.00682e-05	-0.000111833	0.000211969	0.682193	0.00694251	-0.00638987	0.0202749
PFOA_prenatal_BMI_girls	Romano et al., 2022; Zhang, Lei, et al., 2022; Bloom et al., 2022; Zhang, Pan, et al., 2022; Hartman et al., 2017; Liu et al., 2020; Andersen et al., 2013; Jensen et al., 2020; Chen et al., 2019; Chen et al., 2017; Yeung et al., 2019; Manzano-Salgado et al., 2017	Mora et al., 2017	4.89397e-05	-0.000112963	0.000210842	0.645669	0.0035024	-0.010172	0.0171768
PFOA_prenatal_BMI_girls	Romano et al., 2022; Zhang, Lei, et al., 2022; Bloom et al., 2022; Zhang, Pan, et al., 2022; Hartman et al., 2017; Liu et al., 2020; Andersen et al., 2013; Mora et al., 2017; Chen et al., 2019; Chen et al., 2017; Yeung et al., 2019; Manzano-Salgado et al., 2017	Jensen et al., 2020	4.96623e-05	-0.000112238	0.000211562	0.663759	0.00149552	-0.0108418	0.0138329
PFOA_prenatal_BMI_girls	Romano et al., 2022; Zhang, Lei, et al., 2022; Bloom et al., 2022; Zhang, Pan, et al., 2022; Hartman et al., 2017; Liu et al., 2020; Andersen et al., 2013; Mora et al., 2017; Jensen et al., 2020; Chen et al., 2017; Yeung et al., 2019; Manzano-Salgado et al., 2017	Chen et al., 2019	-0.000328042	-0.0133762	0.0127201	0.681132	0.00582353	-0.00834249	0.0199896
PFOA_prenatal_BMI_girls	Romano et al., 2022; Zhang, Lei, et al., 2022; Bloom et al., 2022; Zhang, Pan, et al., 2022; Hartman et al., 2017; Liu et al., 2020; Andersen et al., 2013; Mora et al., 2017; Jensen et al., 2020; Chen et al., 2019; Yeung et al., 2019; Manzano-Salgado et al., 2017	Chen et al., 2017	4.97795e-05	-0.00011212	0.000211679	0.67417	0.00212538	-0.00951427	0.013765
PFOA_prenatal_BMI_girls	Romano et al., 2022; Zhang, Lei, et al., 2022; Bloom et al., 2022; Zhang, Pan, et al., 2022; Hartman et al., 2017; Liu et al., 2020; Andersen et al., 2013; Mora et al., 2017; Jensen et al., 2020; Chen et al., 2019; Chen et al., 2017; Manzano-Salgado et al., 2017	Yeung et al., 2019	5.21682e-05	-0.000109735	0.000214071	0.345415	0.0138383	-0.000224979	0.0279015
PFOA_prenatal_BMI_girls	Romano et al., 2022; Zhang, Lei, et al., 2022; Bloom et al., 2022; Zhang, Pan, et al., 2022; Hartman et al., 2017; Liu et al., 2020; Andersen et al., 2013; Mora et al., 2017; Jensen et al., 2020; Chen et al., 2019; Chen et al., 2017; Yeung et al., 2019	Manzano-Salgado et al., 2017	4.97875e-05	-0.000112113	0.000211687	0.680389	0.00334641	-0.00829821	0.014991
PFOS_prenatal_BMI_both_sexes	Zhang, Lei, et al., 2022; Bloom et al., 2022; Lauritzen et al., 2018; Gyllenhammar et al., 2018; Zhang, Pan, et al., 2022; Sevelsted et al., 2022; Liu et al., 2020; Mora et al., 2017; Jensen et al., 2020; Chen et al., 2019; Chen et al., 2017; Andersen et al., 2010; Karlsen et al., 2017; Yeung et al., 2019; Manzano-Salgado et al., 2017; Hoyer et al., 2015 - Greenland; Hoyer et al., 2015 - Ukraine;…	NONE	-0.000191319	-0.00139317	0.00101053	0.574247	-0.00351728	-0.00958121	0.00254665
PFOS_prenatal_BMI_both_sexes	Bloom et al., 2022; Lauritzen et al., 2018; Gyllenhammar et al., 2018; Zhang, Pan, et al., 2022; Sevelsted et al., 2022; Liu et al., 2020; Mora et al., 2017; Jensen et al., 2020; Chen et al., 2019; Chen et al., 2017; Andersen et al., 2010; Karlsen et al., 2017; Yeung et al., 2019; Manzano-Salgado et al., 2017; Hoyer et al., 2015 - Greenland; Hoyer et al., 2015 - Ukraine; Vrijheid et al., 2020	Zhang, Lei, et al., 2022	-0.000315269	-0.00162288	0.000992343	0.590399	-0.00241999	-0.00875884	0.00391885
PFOS_prenatal_BMI_both_sexes	Zhang, Lei, et al., 2022; Lauritzen et al., 2018; Gyllenhammar et al., 2018; Zhang, Pan, et al., 2022; Sevelsted et al., 2022; Liu et al., 2020; Mora et al., 2017; Jensen et al., 2020; Chen et al., 2019; Chen et al., 2017; Andersen et al., 2010; Karlsen et al., 2017; Yeung et al., 2019; Manzano-Salgado et al., 2017; Hoyer et al., 2015 - Greenland; Hoyer et al., 2015 - Ukraine; Vrijheid et al., 20…	Bloom et al., 2022	3.44293e-05	-0.00145027	0.00151913	0.588466	-0.0022744	-0.00882588	0.00427708
PFOS_prenatal_BMI_both_sexes	Zhang, Lei, et al., 2022; Bloom et al., 2022; Gyllenhammar et al., 2018; Zhang, Pan, et al., 2022; Sevelsted et al., 2022; Liu et al., 2020; Mora et al., 2017; Jensen et al., 2020; Chen et al., 2019; Chen et al., 2017; Andersen et al., 2010; Karlsen et al., 2017; Yeung et al., 2019; Manzano-Salgado et al., 2017; Hoyer et al., 2015 - Greenland; Hoyer et al., 2015 - Ukraine; Vrijheid et al., 2020	Lauritzen et al., 2018	-0.000294642	-0.00153915	0.000949862	0.549976	-0.00316448	-0.00950138	0.00317242
PFOS_prenatal_BMI_both_sexes	Zhang, Lei, et al., 2022; Bloom et al., 2022; Lauritzen et al., 2018; Zhang, Pan, et al., 2022; Sevelsted et al., 2022; Liu et al., 2020; Mora et al., 2017; Jensen et al., 2020; Chen et al., 2019; Chen et al., 2017; Andersen et al., 2010; Karlsen et al., 2017; Yeung et al., 2019; Manzano-Salgado et al., 2017; Hoyer et al., 2015 - Greenland; Hoyer et al., 2015 - Ukraine; Vrijheid et al., 2020	Gyllenhammar et al., 2018	-0.000328785	-0.0015808	0.00092323	0.509812	-0.00298571	-0.00923056	0.00325913
PFOS_prenatal_BMI_both_sexes	Zhang, Lei, et al., 2022; Bloom et al., 2022; Lauritzen et al., 2018; Gyllenhammar et al., 2018; Sevelsted et al., 2022; Liu et al., 2020; Mora et al., 2017; Jensen et al., 2020; Chen et al., 2019; Chen et al., 2017; Andersen et al., 2010; Karlsen et al., 2017; Yeung et al., 2019; Manzano-Salgado et al., 2017; Hoyer et al., 2015 - Greenland; Hoyer et al., 2015 - Ukraine; Vrijheid et al., 2020	Zhang, Pan, et al., 2022	-9.53423e-05	-0.00130874	0.00111805	0.588592	-0.00203376	-0.00880514	0.00473763
PFOS_prenatal_BMI_both_sexes	Zhang, Lei, et al., 2022; Bloom et al., 2022; Lauritzen et al., 2018; Gyllenhammar et al., 2018; Zhang, Pan, et al., 2022; Liu et al., 2020; Mora et al., 2017; Jensen et al., 2020; Chen et al., 2019; Chen et al., 2017; Andersen et al., 2010; Karlsen et al., 2017; Yeung et al., 2019; Manzano-Salgado et al., 2017; Hoyer et al., 2015 - Greenland; Hoyer et al., 2015 - Ukraine; Vrijheid et al., 2020	Sevelsted et al., 2022	-0.000169198	-0.00136344	0.00102505	0.581539	-0.000788303	-0.00678398	0.00520738
PFOS_prenatal_BMI_both_sexes	Zhang, Lei, et al., 2022; Bloom et al., 2022; Lauritzen et al., 2018; Gyllenhammar et al., 2018; Zhang, Pan, et al., 2022; Sevelsted et al., 2022; Mora et al., 2017; Jensen et al., 2020; Chen et al., 2019; Chen et al., 2017; Andersen et al., 2010; Karlsen et al., 2017; Yeung et al., 2019; Manzano-Salgado et al., 2017; Hoyer et al., 2015 - Greenland; Hoyer et al., 2015 - Ukraine; Vrijheid et al., …	Liu et al., 2020	-0.000189895	-0.00139684	0.00101706	0.599244	-0.00228838	-0.00858234	0.00400558
PFOS_prenatal_BMI_both_sexes	Zhang, Lei, et al., 2022; Bloom et al., 2022; Lauritzen et al., 2018; Gyllenhammar et al., 2018; Zhang, Pan, et al., 2022; Sevelsted et al., 2022; Liu et al., 2020; Jensen et al., 2020; Chen et al., 2019; Chen et al., 2017; Andersen et al., 2010; Karlsen et al., 2017; Yeung et al., 2019; Manzano-Salgado et al., 2017; Hoyer et al., 2015 - Greenland; Hoyer et al., 2015 - Ukraine; Vrijheid et al., 2…	Mora et al., 2017	-0.000754975	-0.00221109	0.000701145	0.524079	-0.00275257	-0.00926818	0.00376304
PFOS_prenatal_BMI_both_sexes	Zhang, Lei, et al., 2022; Bloom et al., 2022; Lauritzen et al., 2018; Gyllenhammar et al., 2018; Zhang, Pan, et al., 2022; Sevelsted et al., 2022; Liu et al., 2020; Mora et al., 2017; Chen et al., 2019; Chen et al., 2017; Andersen et al., 2010; Karlsen et al., 2017; Yeung et al., 2019; Manzano-Salgado et al., 2017; Hoyer et al., 2015 - Greenland; Hoyer et al., 2015 - Ukraine; Vrijheid et al., 2020	Jensen et al., 2020	-0.000155122	-0.00134956	0.00103932	0.589647	-0.00181704	-0.00819099	0.00455692
PFOS_prenatal_BMI_both_sexes	Zhang, Lei, et al., 2022; Bloom et al., 2022; Lauritzen et al., 2018; Gyllenhammar et al., 2018; Zhang, Pan, et al., 2022; Sevelsted et al., 2022; Liu et al., 2020; Mora et al., 2017; Jensen et al., 2020; Chen et al., 2017; Andersen et al., 2010; Karlsen et al., 2017; Yeung et al., 2019; Manzano-Salgado et al., 2017; Hoyer et al., 2015 - Greenland; Hoyer et al., 2015 - Ukraine; Vrijheid et al., 2…	Chen et al., 2019	-0.000298235	-0.00305023	0.00245376	0.59805	-0.00234621	-0.00900867	0.00431626
PFOS_prenatal_BMI_both_sexes	Zhang, Lei, et al., 2022; Bloom et al., 2022; Lauritzen et al., 2018; Gyllenhammar et al., 2018; Zhang, Pan, et al., 2022; Sevelsted et al., 2022; Liu et al., 2020; Mora et al., 2017; Jensen et al., 2020; Chen et al., 2019; Andersen et al., 2010; Karlsen et al., 2017; Yeung et al., 2019; Manzano-Salgado et al., 2017; Hoyer et al., 2015 - Greenland; Hoyer et al., 2015 - Ukraine; Vrijheid et al., 2…	Chen et al., 2017	-0.00024179	-0.00274918	0.0022656	0.599137	-0.00220066	-0.00819892	0.0037976
PFOS_prenatal_BMI_both_sexes	Zhang, Lei, et al., 2022; Bloom et al., 2022; Lauritzen et al., 2018; Gyllenhammar et al., 2018; Zhang, Pan, et al., 2022; Sevelsted et al., 2022; Liu et al., 2020; Mora et al., 2017; Jensen et al., 2020; Chen et al., 2019; Chen et al., 2017; Karlsen et al., 2017; Yeung et al., 2019; Manzano-Salgado et al., 2017; Hoyer et al., 2015 - Greenland; Hoyer et al., 2015 - Ukraine; Vrijheid et al., 2020	Andersen et al., 2010	-0.000179496	-0.00325171	0.00289272	0.598665	-0.00189406	-0.00711868	0.00333055
PFOS_prenatal_BMI_both_sexes	Zhang, Lei, et al., 2022; Bloom et al., 2022; Lauritzen et al., 2018; Gyllenhammar et al., 2018; Zhang, Pan, et al., 2022; Sevelsted et al., 2022; Liu et al., 2020; Mora et al., 2017; Jensen et al., 2020; Chen et al., 2019; Chen et al., 2017; Andersen et al., 2010; Yeung et al., 2019; Manzano-Salgado et al., 2017; Hoyer et al., 2015 - Greenland; Hoyer et al., 2015 - Ukraine; Vrijheid et al., 2020	Karlsen et al., 2017	-0.000237296	-0.00149475	0.00102016	0.597234	-0.00243027	-0.0088288	0.00396827
PFOS_prenatal_BMI_both_sexes	Zhang, Lei, et al., 2022; Bloom et al., 2022; Lauritzen et al., 2018; Gyllenhammar et al., 2018; Zhang, Pan, et al., 2022; Sevelsted et al., 2022; Liu et al., 2020; Mora et al., 2017; Jensen et al., 2020; Chen et al., 2019; Chen et al., 2017; Andersen et al., 2010; Karlsen et al., 2017; Manzano-Salgado et al., 2017; Hoyer et al., 2015 - Greenland; Hoyer et al., 2015 - Ukraine; Vrijheid et al., 20…	Yeung et al., 2019	5.42532e-05	-0.000867388	0.000975895	0.351078	-0.000764691	-0.00732791	0.00579853
PFOS_prenatal_BMI_both_sexes	Zhang, Lei, et al., 2022; Bloom et al., 2022; Lauritzen et al., 2018; Gyllenhammar et al., 2018; Zhang, Pan, et al., 2022; Sevelsted et al., 2022; Liu et al., 2020; Mora et al., 2017; Jensen et al., 2020; Chen et al., 2019; Chen et al., 2017; Andersen et al., 2010; Karlsen et al., 2017; Yeung et al., 2019; Hoyer et al., 2015 - Greenland; Hoyer et al., 2015 - Ukraine; Vrijheid et al., 2020	Manzano-Salgado et al., 2017	-0.000209092	-0.00142272	0.00100454	0.596295	-0.00294534	-0.00925232	0.00336164
PFOS_prenatal_BMI_both_sexes	Zhang, Lei, et al., 2022; Bloom et al., 2022; Lauritzen et al., 2018; Gyllenhammar et al., 2018; Zhang, Pan, et al., 2022; Sevelsted et al., 2022; Liu et al., 2020; Mora et al., 2017; Jensen et al., 2020; Chen et al., 2019; Chen et al., 2017; Andersen et al., 2010; Karlsen et al., 2017; Yeung et al., 2019; Manzano-Salgado et al., 2017; Hoyer et al., 2015 - Ukraine; Vrijheid et al., 2020	Hoyer et al., 2015 - Greenland	-0.000156014	-0.00136866	0.00105663	0.596073	-0.00218738	-0.00861991	0.00424515
PFOS_prenatal_BMI_both_sexes	Zhang, Lei, et al., 2022; Bloom et al., 2022; Lauritzen et al., 2018; Gyllenhammar et al., 2018; Zhang, Pan, et al., 2022; Sevelsted et al., 2022; Liu et al., 2020; Mora et al., 2017; Jensen et al., 2020; Chen et al., 2019; Chen et al., 2017; Andersen et al., 2010; Karlsen et al., 2017; Yeung et al., 2019; Manzano-Salgado et al., 2017; Hoyer et al., 2015 - Greenland; Vrijheid et al., 2020	Hoyer et al., 2015 - Ukraine	-0.000198371	-0.00140488	0.00100813	0.598027	-0.00272549	-0.00883299	0.003382
PFOS_prenatal_BMI_both_sexes	Zhang, Lei, et al., 2022; Bloom et al., 2022; Lauritzen et al., 2018; Gyllenhammar et al., 2018; Zhang, Pan, et al., 2022; Sevelsted et al., 2022; Liu et al., 2020; Mora et al., 2017; Jensen et al., 2020; Chen et al., 2019; Chen et al., 2017; Andersen et al., 2010; Karlsen et al., 2017; Yeung et al., 2019; Manzano-Salgado et al., 2017; Hoyer et al., 2015 - Greenland; Hoyer et al., 2015 - Ukraine	Vrijheid et al., 2020	-3.51603e-05	-0.00163616	0.00156584	0.593873	-0.00233137	-0.00904058	0.00437783
PFOS_prenatal_BMI_boys	Romano et al., 2022; Zhang, Lei, et al., 2022; Bloom et al., 2022; Zhang, Pan, et al., 2022; Liu et al., 2020; Andersen et al., 2013; Mora et al., 2017; Jensen et al., 2020; Chen et al., 2019; Chen et al., 2017; Yeung et al., 2019; Manzano-Salgado et al., 2017	NONE	-7.81247e-05	-0.0010434	0.000887148	0	-0.00440904	-0.0102677	0.00144963
PFOS_prenatal_BMI_boys	Zhang, Lei, et al., 2022; Bloom et al., 2022; Zhang, Pan, et al., 2022; Liu et al., 2020; Andersen et al., 2013; Mora et al., 2017; Jensen et al., 2020; Chen et al., 2019; Chen et al., 2017; Yeung et al., 2019; Manzano-Salgado et al., 2017	Romano et al., 2022	-6.53606e-05	-0.00167354	0.00154282	0.0289785	-0.00455875	-0.0109044	0.00178686
PFOS_prenatal_BMI_boys	Romano et al., 2022; Bloom et al., 2022; Zhang, Pan, et al., 2022; Liu et al., 2020; Andersen et al., 2013; Mora et al., 2017; Jensen et al., 2020; Chen et al., 2019; Chen et al., 2017; Yeung et al., 2019; Manzano-Salgado et al., 2017	Zhang, Lei, et al., 2022	-0.000307184	-0.00193275	0.00131838	0	-0.00471328	-0.0109012	0.0014746
PFOS_prenatal_BMI_boys	Romano et al., 2022; Zhang, Lei, et al., 2022; Zhang, Pan, et al., 2022; Liu et al., 2020; Andersen et al., 2013; Mora et al., 2017; Jensen et al., 2020; Chen et al., 2019; Chen et al., 2017; Yeung et al., 2019; Manzano-Salgado et al., 2017	Bloom et al., 2022	-0.000466957	-0.00233344	0.00139952	0.00366459	-0.00475498	-0.0112003	0.0016903
PFOS_prenatal_BMI_boys	Romano et al., 2022; Zhang, Lei, et al., 2022; Bloom et al., 2022; Liu et al., 2020; Andersen et al., 2013; Mora et al., 2017; Jensen et al., 2020; Chen et al., 2019; Chen et al., 2017; Yeung et al., 2019; Manzano-Salgado et al., 2017	Zhang, Pan, et al., 2022	-1.43782e-05	-0.00106199	0.00103323	0	-0.00432107	-0.0111923	0.00255016
PFOS_prenatal_BMI_boys	Romano et al., 2022; Zhang, Lei, et al., 2022; Bloom et al., 2022; Zhang, Pan, et al., 2022; Andersen et al., 2013; Mora et al., 2017; Jensen et al., 2020; Chen et al., 2019; Chen et al., 2017; Yeung et al., 2019; Manzano-Salgado et al., 2017	Liu et al., 2020	-0.000188127	-0.00166414	0.00128788	0.0288371	-0.00442758	-0.0104461	0.00159097
PFOS_prenatal_BMI_boys	Romano et al., 2022; Zhang, Lei, et al., 2022; Bloom et al., 2022; Zhang, Pan, et al., 2022; Liu et al., 2020; Mora et al., 2017; Jensen et al., 2020; Chen et al., 2019; Chen et al., 2017; Yeung et al., 2019; Manzano-Salgado et al., 2017	Andersen et al., 2013	-0.000283703	-0.00313756	0.00257016	0	-0.00421205	-0.0106831	0.00225897
PFOS_prenatal_BMI_boys	Romano et al., 2022; Zhang, Lei, et al., 2022; Bloom et al., 2022; Zhang, Pan, et al., 2022; Liu et al., 2020; Andersen et al., 2013; Jensen et al., 2020; Chen et al., 2019; Chen et al., 2017; Yeung et al., 2019; Manzano-Salgado et al., 2017	Mora et al., 2017	-0.000400114	-0.00206068	0.00126045	0	-0.00497565	-0.0114852	0.00153387
PFOS_prenatal_BMI_boys	Romano et al., 2022; Zhang, Lei, et al., 2022; Bloom et al., 2022; Zhang, Pan, et al., 2022; Liu et al., 2020; Andersen et al., 2013; Mora et al., 2017; Chen et al., 2019; Chen et al., 2017; Yeung et al., 2019; Manzano-Salgado et al., 2017	Jensen et al., 2020	-0.000177172	-0.0016572	0.00130286	0.0199793	-0.0043037	-0.0103956	0.00178815
PFOS_prenatal_BMI_boys	Romano et al., 2022; Zhang, Lei, et al., 2022; Bloom et al., 2022; Zhang, Pan, et al., 2022; Liu et al., 2020; Andersen et al., 2013; Mora et al., 2017; Jensen et al., 2020; Chen et al., 2017; Yeung et al., 2019; Manzano-Salgado et al., 2017	Chen et al., 2019	-0.00032341	-0.00184635	0.00119953	0.00943766	-0.00458943	-0.0109289	0.00175009
PFOS_prenatal_BMI_boys	Romano et al., 2022; Zhang, Lei, et al., 2022; Bloom et al., 2022; Zhang, Pan, et al., 2022; Liu et al., 2020; Andersen et al., 2013; Mora et al., 2017; Jensen et al., 2020; Chen et al., 2019; Yeung et al., 2019; Manzano-Salgado et al., 2017	Chen et al., 2017	-5.36026e-05	-0.000206303	9.90976e-05	0	-0.00188939	-0.00744669	0.00366791
PFOS_prenatal_BMI_boys	Romano et al., 2022; Zhang, Lei, et al., 2022; Bloom et al., 2022; Zhang, Pan, et al., 2022; Liu et al., 2020; Andersen et al., 2013; Mora et al., 2017; Jensen et al., 2020; Chen et al., 2019; Chen et al., 2017; Manzano-Salgado et al., 2017	Yeung et al., 2019	-0.000293102	-0.00291437	0.00232816	0	-0.00331722	-0.0099	0.00326555
PFOS_prenatal_BMI_boys	Romano et al., 2022; Zhang, Lei, et al., 2022; Bloom et al., 2022; Zhang, Pan, et al., 2022; Liu et al., 2020; Andersen et al., 2013; Mora et al., 2017; Jensen et al., 2020; Chen et al., 2019; Chen et al., 2017; Yeung et al., 2019	Manzano-Salgado et al., 2017	-0.000185878	-0.00162895	0.0012572	0.0239276	-0.00528345	-0.0102135	-0.000353415
PFOS_prenatal_BMI_girls	Romano et al., 2022; Zhang, Lei, et al., 2022; Bloom et al., 2022; Zhang, Pan, et al., 2022; Hartman et al., 2017; Liu et al., 2020; Andersen et al., 2013; Mora et al., 2017; Jensen et al., 2020; Chen et al., 2019; Chen et al., 2017; Yeung et al., 2019; Manzano-Salgado et al., 2017	NONE	-0.00122999	-0.00432731	0.00186733	0.625516	-0.000947208	-0.00637124	0.00447683
PFOS_prenatal_BMI_girls	Zhang, Lei, et al., 2022; Bloom et al., 2022; Zhang, Pan, et al., 2022; Hartman et al., 2017; Liu et al., 2020; Andersen et al., 2013; Mora et al., 2017; Jensen et al., 2020; Chen et al., 2019; Chen et al., 2017; Yeung et al., 2019; Manzano-Salgado et al., 2017	Romano et al., 2022	-0.001558	-0.00536885	0.00225285	0.649332	0.00089781	-0.00517111	0.00696673
PFOS_prenatal_BMI_girls	Romano et al., 2022; Bloom et al., 2022; Zhang, Pan, et al., 2022; Hartman et al., 2017; Liu et al., 2020; Andersen et al., 2013; Mora et al., 2017; Jensen et al., 2020; Chen et al., 2019; Chen et al., 2017; Yeung et al., 2019; Manzano-Salgado et al., 2017	Zhang, Lei, et al., 2022	-0.00143771	-0.00517523	0.00229982	0.656699	0.000903596	-0.00493317	0.00674036
PFOS_prenatal_BMI_girls	Romano et al., 2022; Zhang, Lei, et al., 2022; Zhang, Pan, et al., 2022; Hartman et al., 2017; Liu et al., 2020; Andersen et al., 2013; Mora et al., 2017; Jensen et al., 2020; Chen et al., 2019; Chen et al., 2017; Yeung et al., 2019; Manzano-Salgado et al., 2017	Bloom et al., 2022	-0.000108604	-0.000474566	0.000257359	0.602148	0.00132407	-0.00469836	0.0073465
PFOS_prenatal_BMI_girls	Romano et al., 2022; Zhang, Lei, et al., 2022; Bloom et al., 2022; Hartman et al., 2017; Liu et al., 2020; Andersen et al., 2013; Mora et al., 2017; Jensen et al., 2020; Chen et al., 2019; Chen et al., 2017; Yeung et al., 2019; Manzano-Salgado et al., 2017	Zhang, Pan, et al., 2022	-0.00149725	-0.00509101	0.00209651	0.655887	0.000830328	-0.00553776	0.00719842
PFOS_prenatal_BMI_girls	Romano et al., 2022; Zhang, Lei, et al., 2022; Bloom et al., 2022; Zhang, Pan, et al., 2022; Liu et al., 2020; Andersen et al., 2013; Mora et al., 2017; Jensen et al., 2020; Chen et al., 2019; Chen et al., 2017; Yeung et al., 2019; Manzano-Salgado et al., 2017	Hartman et al., 2017	-5.17976e-05	-0.000425485	0.000321889	0.60024	0.00107398	-0.00496156	0.00710951
PFOS_prenatal_BMI_girls	Romano et al., 2022; Zhang, Lei, et al., 2022; Bloom et al., 2022; Zhang, Pan, et al., 2022; Hartman et al., 2017; Andersen et al., 2013; Mora et al., 2017; Jensen et al., 2020; Chen et al., 2019; Chen et al., 2017; Yeung et al., 2019; Manzano-Salgado et al., 2017	Liu et al., 2020	-0.00130095	-0.00459628	0.00199438	0.656532	0.000807297	-0.00488606	0.00650066
PFOS_prenatal_BMI_girls	Romano et al., 2022; Zhang, Lei, et al., 2022; Bloom et al., 2022; Zhang, Pan, et al., 2022; Hartman et al., 2017; Liu et al., 2020; Mora et al., 2017; Jensen et al., 2020; Chen et al., 2019; Chen et al., 2017; Yeung et al., 2019; Manzano-Salgado et al., 2017	Andersen et al., 2013	-0.0011409	-0.00477236	0.00249057	0.650617	0.00119581	-0.00485899	0.00725062
PFOS_prenatal_BMI_girls	Romano et al., 2022; Zhang, Lei, et al., 2022; Bloom et al., 2022; Zhang, Pan, et al., 2022; Hartman et al., 2017; Liu et al., 2020; Andersen et al., 2013; Jensen et al., 2020; Chen et al., 2019; Chen et al., 2017; Yeung et al., 2019; Manzano-Salgado et al., 2017	Mora et al., 2017	-0.00184299	-0.00455152	0.000865538	0.60126	0.000335905	-0.00574057	0.00641238
PFOS_prenatal_BMI_girls	Romano et al., 2022; Zhang, Lei, et al., 2022; Bloom et al., 2022; Zhang, Pan, et al., 2022; Hartman et al., 2017; Liu et al., 2020; Andersen et al., 2013; Mora et al., 2017; Chen et al., 2019; Chen et al., 2017; Yeung et al., 2019; Manzano-Salgado et al., 2017	Jensen et al., 2020	-0.00116141	-0.00440842	0.00208561	0.652219	0.00165143	-0.00394092	0.00724378
PFOS_prenatal_BMI_girls	Romano et al., 2022; Zhang, Lei, et al., 2022; Bloom et al., 2022; Zhang, Pan, et al., 2022; Hartman et al., 2017; Liu et al., 2020; Andersen et al., 2013; Mora et al., 2017; Jensen et al., 2020; Chen et al., 2017; Yeung et al., 2019; Manzano-Salgado et al., 2017	Chen et al., 2019	-0.00151821	-0.00534963	0.0023132	0.65114	0.000912424	-0.00517549	0.00700034
PFOS_prenatal_BMI_girls	Romano et al., 2022; Zhang, Lei, et al., 2022; Bloom et al., 2022; Zhang, Pan, et al., 2022; Hartman et al., 2017; Liu et al., 2020; Andersen et al., 2013; Mora et al., 2017; Jensen et al., 2020; Chen et al., 2019; Yeung et al., 2019; Manzano-Salgado et al., 2017	Chen et al., 2017	-0.000845287	-0.00237731	0.000686731	0.608571	-0.00253257	-0.00739892	0.00233377
PFOS_prenatal_BMI_girls	Romano et al., 2022; Zhang, Lei, et al., 2022; Bloom et al., 2022; Zhang, Pan, et al., 2022; Hartman et al., 2017; Liu et al., 2020; Andersen et al., 2013; Mora et al., 2017; Jensen et al., 2020; Chen et al., 2019; Chen et al., 2017; Manzano-Salgado et al., 2017	Yeung et al., 2019	-0.000481273	-0.00192376	0.000961219	0.429402	0.00417971	-0.00191336	0.0102728
PFOS_prenatal_BMI_girls	Romano et al., 2022; Zhang, Lei, et al., 2022; Bloom et al., 2022; Zhang, Pan, et al., 2022; Hartman et al., 2017; Liu et al., 2020; Andersen et al., 2013; Mora et al., 2017; Jensen et al., 2020; Chen et al., 2019; Chen et al., 2017; Yeung et al., 2019	Manzano-Salgado et al., 2017	-0.00136133	-0.0045707	0.00184805	0.651635	-0.000261421	-0.00535903	0.00483619
PFHxS_prenatal_BMI_both_sexes	Zhang, Lei, et al., 2022; Bloom et al., 2022; Gyllenhammar et al., 2018; Zhang, Pan, et al., 2022; Liu et al., 2020; Mora et al., 2017; Jensen et al., 2020; Chen et al., 2019; Karlsen et al., 2017; Manzano-Salgado et al., 2017; Vrijheid et al., 2020	NONE	-4.40955e-05	-0.00701018	0.00692199	0	-0.000760742	-0.0524107	0.0508892
PFHxS_prenatal_BMI_both_sexes	Bloom et al., 2022; Gyllenhammar et al., 2018; Zhang, Pan, et al., 2022; Liu et al., 2020; Mora et al., 2017; Jensen et al., 2020; Chen et al., 2019; Karlsen et al., 2017; Manzano-Salgado et al., 2017; Vrijheid et al., 2020	Zhang, Lei, et al., 2022	-0.00021938	-0.00722798	0.00678922	0	0.0134672	-0.036522	0.0634564
PFHxS_prenatal_BMI_both_sexes	Zhang, Lei, et al., 2022; Gyllenhammar et al., 2018; Zhang, Pan, et al., 2022; Liu et al., 2020; Mora et al., 2017; Jensen et al., 2020; Chen et al., 2019; Karlsen et al., 2017; Manzano-Salgado et al., 2017; Vrijheid et al., 2020	Bloom et al., 2022	0.000667363	-0.00693311	0.00826783	0	0.0185239	-0.0335328	0.0705806
PFHxS_prenatal_BMI_both_sexes	Zhang, Lei, et al., 2022; Bloom et al., 2022; Zhang, Pan, et al., 2022; Liu et al., 2020; Mora et al., 2017; Jensen et al., 2020; Chen et al., 2019; Karlsen et al., 2017; Manzano-Salgado et al., 2017; Vrijheid et al., 2020	Gyllenhammar et al., 2018	-0.000439574	-0.00830135	0.0074222	0	0.0137636	-0.036192	0.0637191
PFHxS_prenatal_BMI_both_sexes	Zhang, Lei, et al., 2022; Bloom et al., 2022; Gyllenhammar et al., 2018; Liu et al., 2020; Mora et al., 2017; Jensen et al., 2020; Chen et al., 2019; Karlsen et al., 2017; Manzano-Salgado et al., 2017; Vrijheid et al., 2020	Zhang, Pan, et al., 2022	7.30158e-06	-0.00700316	0.00701777	0	0.0190347	-0.033582	0.0716514
PFHxS_prenatal_BMI_both_sexes	Zhang, Lei, et al., 2022; Bloom et al., 2022; Gyllenhammar et al., 2018; Zhang, Pan, et al., 2022; Mora et al., 2017; Jensen et al., 2020; Chen et al., 2019; Karlsen et al., 2017; Manzano-Salgado et al., 2017; Vrijheid et al., 2020	Liu et al., 2020	-0.0001269	-0.00709308	0.00683928	0	-0.00652052	-0.0493808	0.0363397
PFHxS_prenatal_BMI_both_sexes	Zhang, Lei, et al., 2022; Bloom et al., 2022; Gyllenhammar et al., 2018; Zhang, Pan, et al., 2022; Liu et al., 2020; Jensen et al., 2020; Chen et al., 2019; Karlsen et al., 2017; Manzano-Salgado et al., 2017; Vrijheid et al., 2020	Mora et al., 2017	-0.000752973	-0.00847944	0.00697349	0	0.0149147	-0.0382381	0.0680674
PFHxS_prenatal_BMI_both_sexes	Zhang, Lei, et al., 2022; Bloom et al., 2022; Gyllenhammar et al., 2018; Zhang, Pan, et al., 2022; Liu et al., 2020; Mora et al., 2017; Chen et al., 2019; Karlsen et al., 2017; Manzano-Salgado et al., 2017; Vrijheid et al., 2020	Jensen et al., 2020	8.64284e-06	-0.00730159	0.00731888	0	0.0113434	-0.0371532	0.05984
PFHxS_prenatal_BMI_both_sexes	Zhang, Lei, et al., 2022; Bloom et al., 2022; Gyllenhammar et al., 2018; Zhang, Pan, et al., 2022; Liu et al., 2020; Mora et al., 2017; Jensen et al., 2020; Karlsen et al., 2017; Manzano-Salgado et al., 2017; Vrijheid et al., 2020	Chen et al., 2019	0.00489627	-0.0105271	0.0203196	0	0.0150173	-0.0362476	0.0662821
PFHxS_prenatal_BMI_both_sexes	Zhang, Lei, et al., 2022; Bloom et al., 2022; Gyllenhammar et al., 2018; Zhang, Pan, et al., 2022; Liu et al., 2020; Mora et al., 2017; Jensen et al., 2020; Chen et al., 2019; Manzano-Salgado et al., 2017; Vrijheid et al., 2020	Karlsen et al., 2017	-6.07747e-05	-0.0078095	0.00768795	0	0.0125616	-0.0381466	0.0632699
PFHxS_prenatal_BMI_both_sexes	Zhang, Lei, et al., 2022; Bloom et al., 2022; Gyllenhammar et al., 2018; Zhang, Pan, et al., 2022; Liu et al., 2020; Mora et al., 2017; Jensen et al., 2020; Chen et al., 2019; Karlsen et al., 2017; Vrijheid et al., 2020	Manzano-Salgado et al., 2017	0.000225926	-0.00712016	0.00757201	0	0.0231858	-0.0274016	0.0737732
PFHxS_prenatal_BMI_both_sexes	Zhang, Lei, et al., 2022; Bloom et al., 2022; Gyllenhammar et al., 2018; Zhang, Pan, et al., 2022; Liu et al., 2020; Mora et al., 2017; Jensen et al., 2020; Chen et al., 2019; Karlsen et al., 2017; Manzano-Salgado et al., 2017	Vrijheid et al., 2020	7.45601e-05	-0.00718326	0.00733238	0	0.0188689	-0.0278909	0.0656287
PFHxS_prenatal_BMI_boys	Romano et al., 2022; Zhang, Lei, et al., 2022; Bloom et al., 2022; Zhang, Pan, et al., 2022; Liu et al., 2020; Mora et al., 2017; Jensen et al., 2020; Chen et al., 2019; Manzano-Salgado et al., 2017	NONE	-0.00198396	-0.00504806	0.00108013	0	-0.0267962	-0.0982814	0.0446891
PFHxS_prenatal_BMI_boys	Zhang, Lei, et al., 2022; Bloom et al., 2022; Zhang, Pan, et al., 2022; Liu et al., 2020; Mora et al., 2017; Jensen et al., 2020; Chen et al., 2019; Manzano-Salgado et al., 2017	Romano et al., 2022	0.00385874	-0.0107935	0.0185109	0	-0.0364571	-0.127579	0.0546654
PFHxS_prenatal_BMI_boys	Romano et al., 2022; Bloom et al., 2022; Zhang, Pan, et al., 2022; Liu et al., 2020; Mora et al., 2017; Jensen et al., 2020; Chen et al., 2019; Manzano-Salgado et al., 2017	Zhang, Lei, et al., 2022	-0.00199009	-0.00505476	0.00107459	0	-0.0367029	-0.124897	0.0514911
PFHxS_prenatal_BMI_boys	Romano et al., 2022; Zhang, Lei, et al., 2022; Zhang, Pan, et al., 2022; Liu et al., 2020; Mora et al., 2017; Jensen et al., 2020; Chen et al., 2019; Manzano-Salgado et al., 2017	Bloom et al., 2022	-0.0019576	-0.00502375	0.00110856	0	-0.0349995	-0.128131	0.0581323
PFHxS_prenatal_BMI_boys	Romano et al., 2022; Zhang, Lei, et al., 2022; Bloom et al., 2022; Liu et al., 2020; Mora et al., 2017; Jensen et al., 2020; Chen et al., 2019; Manzano-Salgado et al., 2017	Zhang, Pan, et al., 2022	-0.00197743	-0.00504268	0.00108782	0	-0.0396715	-0.141002	0.0616592
PFHxS_prenatal_BMI_boys	Romano et al., 2022; Zhang, Lei, et al., 2022; Bloom et al., 2022; Zhang, Pan, et al., 2022; Mora et al., 2017; Jensen et al., 2020; Chen et al., 2019; Manzano-Salgado et al., 2017	Liu et al., 2020	-0.00197904	-0.00504315	0.00108507	0	-0.0102871	-0.0795152	0.0589409
PFHxS_prenatal_BMI_boys	Romano et al., 2022; Zhang, Lei, et al., 2022; Bloom et al., 2022; Zhang, Pan, et al., 2022; Liu et al., 2020; Jensen et al., 2020; Chen et al., 2019; Manzano-Salgado et al., 2017	Mora et al., 2017	-0.001193	-0.00741933	0.00503333	0	-0.037736	-0.133144	0.0576719
PFHxS_prenatal_BMI_boys	Romano et al., 2022; Zhang, Lei, et al., 2022; Bloom et al., 2022; Zhang, Pan, et al., 2022; Liu et al., 2020; Mora et al., 2017; Chen et al., 2019; Manzano-Salgado et al., 2017	Jensen et al., 2020	-0.00198957	-0.00505373	0.00107458	0	-0.053316	-0.127223	0.0205908
PFHxS_prenatal_BMI_boys	Romano et al., 2022; Zhang, Lei, et al., 2022; Bloom et al., 2022; Zhang, Pan, et al., 2022; Liu et al., 2020; Mora et al., 2017; Jensen et al., 2020; Manzano-Salgado et al., 2017	Chen et al., 2019	-0.00233301	-0.00544603	0.00078	0	-0.0375535	-0.128746	0.0536386
PFHxS_prenatal_BMI_boys	Romano et al., 2022; Zhang, Lei, et al., 2022; Bloom et al., 2022; Zhang, Pan, et al., 2022; Liu et al., 2020; Mora et al., 2017; Jensen et al., 2020; Chen et al., 2019	Manzano-Salgado et al., 2017	-0.00195458	-0.005019	0.00110984	0	-0.0158174	-0.106386	0.0747512
PFHxS_prenatal_BMI_girls	Romano et al., 2022; Zhang, Lei, et al., 2022; Bloom et al., 2022; Zhang, Pan, et al., 2022; Hartman et al., 2017; Liu et al., 2020; Mora et al., 2017; Jensen et al., 2020; Chen et al., 2019; Manzano-Salgado et al., 2017	NONE	-0.00104303	-0.00461885	0.00253278	0	0.0486426	-0.00130474	0.09859
PFHxS_prenatal_BMI_girls	Zhang, Lei, et al., 2022; Bloom et al., 2022; Zhang, Pan, et al., 2022; Hartman et al., 2017; Liu et al., 2020; Mora et al., 2017; Jensen et al., 2020; Chen et al., 2019; Manzano-Salgado et al., 2017	Romano et al., 2022	-0.00126914	-0.00524071	0.00270242	0	0.0476564	-0.00657904	0.101892
PFHxS_prenatal_BMI_girls	Romano et al., 2022; Bloom et al., 2022; Zhang, Pan, et al., 2022; Hartman et al., 2017; Liu et al., 2020; Mora et al., 2017; Jensen et al., 2020; Chen et al., 2019; Manzano-Salgado et al., 2017	Zhang, Lei, et al., 2022	-0.00112586	-0.00473657	0.00248486	0.0279695	0.0460056	-0.00666387	0.098675
PFHxS_prenatal_BMI_girls	Romano et al., 2022; Zhang, Lei, et al., 2022; Zhang, Pan, et al., 2022; Hartman et al., 2017; Liu et al., 2020; Mora et al., 2017; Jensen et al., 2020; Chen et al., 2019; Manzano-Salgado et al., 2017	Bloom et al., 2022	-0.00124535	-0.00361806	0.00112735	0	0.0540631	-0.000613684	0.10874
PFHxS_prenatal_BMI_girls	Romano et al., 2022; Zhang, Lei, et al., 2022; Bloom et al., 2022; Hartman et al., 2017; Liu et al., 2020; Mora et al., 2017; Jensen et al., 2020; Chen et al., 2019; Manzano-Salgado et al., 2017	Zhang, Pan, et al., 2022	-0.00103608	-0.00507564	0.00300347	0	0.0298432	-0.0258666	0.0855529
PFHxS_prenatal_BMI_girls	Romano et al., 2022; Zhang, Lei, et al., 2022; Bloom et al., 2022; Zhang, Pan, et al., 2022; Liu et al., 2020; Mora et al., 2017; Jensen et al., 2020; Chen et al., 2019; Manzano-Salgado et al., 2017	Hartman et al., 2017	0.000691725	-0.00742699	0.00881044	0.0628911	0.0493095	-0.00602958	0.104649
PFHxS_prenatal_BMI_girls	Romano et al., 2022; Zhang, Lei, et al., 2022; Bloom et al., 2022; Zhang, Pan, et al., 2022; Hartman et al., 2017; Mora et al., 2017; Jensen et al., 2020; Chen et al., 2019; Manzano-Salgado et al., 2017	Liu et al., 2020	-0.00130091	-0.00342258	0.000820756	0	0.0261521	-0.0136047	0.065909
PFHxS_prenatal_BMI_girls	Romano et al., 2022; Zhang, Lei, et al., 2022; Bloom et al., 2022; Zhang, Pan, et al., 2022; Hartman et al., 2017; Liu et al., 2020; Jensen et al., 2020; Chen et al., 2019; Manzano-Salgado et al., 2017	Mora et al., 2017	-0.00110379	-0.00534278	0.0031352	0.00609476	0.0488671	-0.00730813	0.105042
PFHxS_prenatal_BMI_girls	Romano et al., 2022; Zhang, Lei, et al., 2022; Bloom et al., 2022; Zhang, Pan, et al., 2022; Hartman et al., 2017; Liu et al., 2020; Mora et al., 2017; Chen et al., 2019; Manzano-Salgado et al., 2017	Jensen et al., 2020	-0.000996391	-0.00475712	0.00276433	0.0727429	0.0458272	-0.00452948	0.096184
PFHxS_prenatal_BMI_girls	Romano et al., 2022; Zhang, Lei, et al., 2022; Bloom et al., 2022; Zhang, Pan, et al., 2022; Hartman et al., 2017; Liu et al., 2020; Mora et al., 2017; Jensen et al., 2020; Manzano-Salgado et al., 2017	Chen et al., 2019	0.000442414	-0.00505115	0.00593598	0	0.0483435	-0.00571195	0.102399
PFHxS_prenatal_BMI_girls	Romano et al., 2022; Zhang, Lei, et al., 2022; Bloom et al., 2022; Zhang, Pan, et al., 2022; Hartman et al., 2017; Liu et al., 2020; Mora et al., 2017; Jensen et al., 2020; Chen et al., 2019	Manzano-Salgado et al., 2017	-0.00107168	-0.00459349	0.00245013	0.0689195	0.0467869	-0.00473687	0.0983108
PFNA_prenatal_BMI_both_sexes	Zhang, Lei, et al., 2022; Bloom et al., 2022; Gyllenhammar et al., 2018; Zhang, Pan, et al., 2022; Liu et al., 2020; Mora et al., 2017; Jensen et al., 2020; Chen et al., 2019; Karlsen et al., 2017; Manzano-Salgado et al., 2017; Vrijheid et al., 2020	NONE	-0.000204666	-0.0033514	0.00294207	0.21047	0.0480581	-0.0130068	0.109123
PFNA_prenatal_BMI_both_sexes	Bloom et al., 2022; Gyllenhammar et al., 2018; Zhang, Pan, et al., 2022; Liu et al., 2020; Mora et al., 2017; Jensen et al., 2020; Chen et al., 2019; Karlsen et al., 2017; Manzano-Salgado et al., 2017; Vrijheid et al., 2020	Zhang, Lei, et al., 2022	-0.000218725	-0.00338344	0.00294599	0.289048	0.078591	-0.0230536	0.180235
PFNA_prenatal_BMI_both_sexes	Zhang, Lei, et al., 2022; Gyllenhammar et al., 2018; Zhang, Pan, et al., 2022; Liu et al., 2020; Mora et al., 2017; Jensen et al., 2020; Chen et al., 2019; Karlsen et al., 2017; Manzano-Salgado et al., 2017; Vrijheid et al., 2020	Bloom et al., 2022	-0.000185825	-0.00333386	0.00296221	0.279906	0.0845101	-0.0205268	0.189547
PFNA_prenatal_BMI_both_sexes	Zhang, Lei, et al., 2022; Bloom et al., 2022; Zhang, Pan, et al., 2022; Liu et al., 2020; Mora et al., 2017; Jensen et al., 2020; Chen et al., 2019; Karlsen et al., 2017; Manzano-Salgado et al., 2017; Vrijheid et al., 2020	Gyllenhammar et al., 2018	-0.000219123	-0.00336591	0.00292767	0.125524	0.0568708	-0.039822	0.153564
PFNA_prenatal_BMI_both_sexes	Zhang, Lei, et al., 2022; Bloom et al., 2022; Gyllenhammar et al., 2018; Liu et al., 2020; Mora et al., 2017; Jensen et al., 2020; Chen et al., 2019; Karlsen et al., 2017; Manzano-Salgado et al., 2017; Vrijheid et al., 2020	Zhang, Pan, et al., 2022	-5.83043e-05	-0.00321497	0.00309836	0.207152	0.0954121	-0.0203993	0.211224
PFNA_prenatal_BMI_both_sexes	Zhang, Lei, et al., 2022; Bloom et al., 2022; Gyllenhammar et al., 2018; Zhang, Pan, et al., 2022; Mora et al., 2017; Jensen et al., 2020; Chen et al., 2019; Karlsen et al., 2017; Manzano-Salgado et al., 2017; Vrijheid et al., 2020	Liu et al., 2020	-0.000195835	-0.00389389	0.00350222	0.274045	0.0555177	0.00523479	0.105801
PFNA_prenatal_BMI_both_sexes	Zhang, Lei, et al., 2022; Bloom et al., 2022; Gyllenhammar et al., 2018; Zhang, Pan, et al., 2022; Liu et al., 2020; Jensen et al., 2020; Chen et al., 2019; Karlsen et al., 2017; Manzano-Salgado et al., 2017; Vrijheid et al., 2020	Mora et al., 2017	-0.000251634	-0.00339896	0.00289569	0.133316	0.0686521	-0.0365415	0.173846
PFNA_prenatal_BMI_both_sexes	Zhang, Lei, et al., 2022; Bloom et al., 2022; Gyllenhammar et al., 2018; Zhang, Pan, et al., 2022; Liu et al., 2020; Mora et al., 2017; Chen et al., 2019; Karlsen et al., 2017; Manzano-Salgado et al., 2017; Vrijheid et al., 2020	Jensen et al., 2020	-0.000274396	-0.00342174	0.00287295	0	0.0645401	-0.0389252	0.168005
PFNA_prenatal_BMI_both_sexes	Zhang, Lei, et al., 2022; Bloom et al., 2022; Gyllenhammar et al., 2018; Zhang, Pan, et al., 2022; Liu et al., 2020; Mora et al., 2017; Jensen et al., 2020; Karlsen et al., 2017; Manzano-Salgado et al., 2017; Vrijheid et al., 2020	Chen et al., 2019	0.00107161	-0.0203662	0.0225094	0.288642	0.0804079	-0.0239694	0.184785
PFNA_prenatal_BMI_both_sexes	Zhang, Lei, et al., 2022; Bloom et al., 2022; Gyllenhammar et al., 2018; Zhang, Pan, et al., 2022; Liu et al., 2020; Mora et al., 2017; Jensen et al., 2020; Chen et al., 2019; Manzano-Salgado et al., 2017; Vrijheid et al., 2020	Karlsen et al., 2017	-0.000204967	-0.00335402	0.00294408	0.289422	0.0801307	-0.0227521	0.183013
PFNA_prenatal_BMI_both_sexes	Zhang, Lei, et al., 2022; Bloom et al., 2022; Gyllenhammar et al., 2018; Zhang, Pan, et al., 2022; Liu et al., 2020; Mora et al., 2017; Jensen et al., 2020; Chen et al., 2019; Karlsen et al., 2017; Vrijheid et al., 2020	Manzano-Salgado et al., 2017	-0.000249455	-0.00339707	0.00289816	0.201771	0.0739054	-0.0331627	0.180974
PFNA_prenatal_BMI_both_sexes	Zhang, Lei, et al., 2022; Bloom et al., 2022; Gyllenhammar et al., 2018; Zhang, Pan, et al., 2022; Liu et al., 2020; Mora et al., 2017; Jensen et al., 2020; Chen et al., 2019; Karlsen et al., 2017; Manzano-Salgado et al., 2017	Vrijheid et al., 2020	-0.000204724	-0.0033519	0.00294245	0.289423	0.0856671	-0.020837	0.192171
PFNA_prenatal_BMI_boys	Romano et al., 2022; Zhang, Lei, et al., 2022; Bloom et al., 2022; Zhang, Pan, et al., 2022; Liu et al., 2020; Mora et al., 2017; Jensen et al., 2020; Chen et al., 2019; Manzano-Salgado et al., 2017	NONE	-0.00238332	-0.0110573	0.00629064	0.221827	0.0930773	0.0108356	0.175319
PFNA_prenatal_BMI_boys	Zhang, Lei, et al., 2022; Bloom et al., 2022; Zhang, Pan, et al., 2022; Liu et al., 2020; Mora et al., 2017; Jensen et al., 2020; Chen et al., 2019; Manzano-Salgado et al., 2017	Romano et al., 2022	0.00159811	-0.00551119	0.00870742	0.13996	0.179572	0.0231219	0.336022
PFNA_prenatal_BMI_boys	Romano et al., 2022; Bloom et al., 2022; Zhang, Pan, et al., 2022; Liu et al., 2020; Mora et al., 2017; Jensen et al., 2020; Chen et al., 2019; Manzano-Salgado et al., 2017	Zhang, Lei, et al., 2022	-0.00228569	-0.0112929	0.00672148	0.314274	0.174983	0.0226979	0.327268
PFNA_prenatal_BMI_boys	Romano et al., 2022; Zhang, Lei, et al., 2022; Zhang, Pan, et al., 2022; Liu et al., 2020; Mora et al., 2017; Jensen et al., 2020; Chen et al., 2019; Manzano-Salgado et al., 2017	Bloom et al., 2022	-0.00250682	-0.0112561	0.00624243	0.306264	0.179584	0.0201605	0.339007
PFNA_prenatal_BMI_boys	Romano et al., 2022; Zhang, Lei, et al., 2022; Bloom et al., 2022; Liu et al., 2020; Mora et al., 2017; Jensen et al., 2020; Chen et al., 2019; Manzano-Salgado et al., 2017	Zhang, Pan, et al., 2022	-0.0014957	-0.0103375	0.00734606	0.239435	0.213732	0.0329036	0.39456
PFNA_prenatal_BMI_boys	Romano et al., 2022; Zhang, Lei, et al., 2022; Bloom et al., 2022; Zhang, Pan, et al., 2022; Mora et al., 2017; Jensen et al., 2020; Chen et al., 2019; Manzano-Salgado et al., 2017	Liu et al., 2020	-0.00241365	-0.0110799	0.00625259	0	0.0401963	-0.0177178	0.0981104
PFNA_prenatal_BMI_boys	Romano et al., 2022; Zhang, Lei, et al., 2022; Bloom et al., 2022; Zhang, Pan, et al., 2022; Liu et al., 2020; Jensen et al., 2020; Chen et al., 2019; Manzano-Salgado et al., 2017	Mora et al., 2017	-0.00246424	-0.0112119	0.00628344	0.308205	0.180089	0.0205091	0.339669
PFNA_prenatal_BMI_boys	Romano et al., 2022; Zhang, Lei, et al., 2022; Bloom et al., 2022; Zhang, Pan, et al., 2022; Liu et al., 2020; Mora et al., 2017; Chen et al., 2019; Manzano-Salgado et al., 2017	Jensen et al., 2020	-0.00256256	-0.0113396	0.00621447	0.26325	0.171038	0.0133687	0.328707
PFNA_prenatal_BMI_boys	Romano et al., 2022; Zhang, Lei, et al., 2022; Bloom et al., 2022; Zhang, Pan, et al., 2022; Liu et al., 2020; Mora et al., 2017; Jensen et al., 2020; Manzano-Salgado et al., 2017	Chen et al., 2019	-0.0077247	-0.0179571	0.00250771	0.0989184	0.17881	0.0223022	0.335319
PFNA_prenatal_BMI_boys	Romano et al., 2022; Zhang, Lei, et al., 2022; Bloom et al., 2022; Zhang, Pan, et al., 2022; Liu et al., 2020; Mora et al., 2017; Jensen et al., 2020; Chen et al., 2019	Manzano-Salgado et al., 2017	-0.00268918	-0.0114907	0.00611231	0.133931	0.163967	0.00142103	0.326513
PFNA_prenatal_BMI_girls	Romano et al., 2022; Zhang, Lei, et al., 2022; Bloom et al., 2022; Zhang, Pan, et al., 2022; Hartman et al., 2017; Liu et al., 2020; Mora et al., 2017; Jensen et al., 2020; Chen et al., 2019; Manzano-Salgado et al., 2017	NONE	0.00395647	-0.00520187	0.0131148	0.334841	0.0800137	0.00359224	0.156435
PFNA_prenatal_BMI_girls	Zhang, Lei, et al., 2022; Bloom et al., 2022; Zhang, Pan, et al., 2022; Hartman et al., 2017; Liu et al., 2020; Mora et al., 2017; Jensen et al., 2020; Chen et al., 2019; Manzano-Salgado et al., 2017	Romano et al., 2022	0.000470843	-0.00412168	0.00506337	0.340773	0.122627	-0.0140428	0.259296
PFNA_prenatal_BMI_girls	Romano et al., 2022; Bloom et al., 2022; Zhang, Pan, et al., 2022; Hartman et al., 2017; Liu et al., 2020; Mora et al., 2017; Jensen et al., 2020; Chen et al., 2019; Manzano-Salgado et al., 2017	Zhang, Lei, et al., 2022	0.00580992	-0.00756701	0.0191868	0.386308	0.12043	-0.0127375	0.253598
PFNA_prenatal_BMI_girls	Romano et al., 2022; Zhang, Lei, et al., 2022; Zhang, Pan, et al., 2022; Hartman et al., 2017; Liu et al., 2020; Mora et al., 2017; Jensen et al., 2020; Chen et al., 2019; Manzano-Salgado et al., 2017	Bloom et al., 2022	0.00470102	-0.00491114	0.0143132	0.345884	0.135785	-0.00276815	0.274339
PFNA_prenatal_BMI_girls	Romano et al., 2022; Zhang, Lei, et al., 2022; Bloom et al., 2022; Hartman et al., 2017; Liu et al., 2020; Mora et al., 2017; Jensen et al., 2020; Chen et al., 2019; Manzano-Salgado et al., 2017	Zhang, Pan, et al., 2022	0.00196625	-0.00538004	0.00931255	0.368037	0.136646	-0.0180972	0.291389
PFNA_prenatal_BMI_girls	Romano et al., 2022; Zhang, Lei, et al., 2022; Bloom et al., 2022; Zhang, Pan, et al., 2022; Liu et al., 2020; Mora et al., 2017; Jensen et al., 2020; Chen et al., 2019; Manzano-Salgado et al., 2017	Hartman et al., 2017	0.00357024	-0.00549923	0.0126397	0.400967	0.125487	-0.0136918	0.264666
PFNA_prenatal_BMI_girls	Romano et al., 2022; Zhang, Lei, et al., 2022; Bloom et al., 2022; Zhang, Pan, et al., 2022; Hartman et al., 2017; Mora et al., 2017; Jensen et al., 2020; Chen et al., 2019; Manzano-Salgado et al., 2017	Liu et al., 2020	0.00355165	-0.00511532	0.0122186	0.345185	0.0482849	0.00180299	0.0947669
PFNA_prenatal_BMI_girls	Romano et al., 2022; Zhang, Lei, et al., 2022; Bloom et al., 2022; Zhang, Pan, et al., 2022; Hartman et al., 2017; Liu et al., 2020; Jensen et al., 2020; Chen et al., 2019; Manzano-Salgado et al., 2017	Mora et al., 2017	0.00300323	-0.0052717	0.0112781	0.237274	0.103067	-0.0355325	0.241667
PFNA_prenatal_BMI_girls	Romano et al., 2022; Zhang, Lei, et al., 2022; Bloom et al., 2022; Zhang, Pan, et al., 2022; Hartman et al., 2017; Liu et al., 2020; Mora et al., 2017; Chen et al., 2019; Manzano-Salgado et al., 2017	Jensen et al., 2020	0.00229487	-0.00501539	0.00960513	0.0712057	0.0992955	-0.0368029	0.235394
PFNA_prenatal_BMI_girls	Romano et al., 2022; Zhang, Lei, et al., 2022; Bloom et al., 2022; Zhang, Pan, et al., 2022; Hartman et al., 2017; Liu et al., 2020; Mora et al., 2017; Jensen et al., 2020; Manzano-Salgado et al., 2017	Chen et al., 2019	0.012323	-0.00241051	0.0270565	0.253254	0.123865	-0.0124757	0.260205
PFNA_prenatal_BMI_girls	Romano et al., 2022; Zhang, Lei, et al., 2022; Bloom et al., 2022; Zhang, Pan, et al., 2022; Hartman et al., 2017; Liu et al., 2020; Mora et al., 2017; Jensen et al., 2020; Chen et al., 2019	Manzano-Salgado et al., 2017	0.00404836	-0.0052257	0.0133224	0.408747	0.131078	-0.0109316	0.273088
PFDA_prenatal_BMI_both_sexes	Zhang, Lei, et al., 2022; Bloom et al., 2022; Zhang, Pan, et al., 2022; Jensen et al., 2020; Chen et al., 2019; Karlsen et al., 2017	NONE	-0.000807746	-0.00448716	0.00287167	0.0259872	0.0201239	-0.0643604	0.104608
PFDA_prenatal_BMI_both_sexes	Bloom et al., 2022; Zhang, Pan, et al., 2022; Jensen et al., 2020; Chen et al., 2019; Karlsen et al., 2017	Zhang, Lei, et al., 2022	-0.000821646	-0.00403503	0.00239174	0.212974	0.0318367	-0.0801175	0.143791
PFDA_prenatal_BMI_both_sexes	Zhang, Lei, et al., 2022; Zhang, Pan, et al., 2022; Jensen et al., 2020; Chen et al., 2019; Karlsen et al., 2017	Bloom et al., 2022	-0.000823684	-0.00534209	0.00369472	0.0977838	0.0731334	-0.0099572	0.156224
PFDA_prenatal_BMI_both_sexes	Zhang, Lei, et al., 2022; Bloom et al., 2022; Jensen et al., 2020; Chen et al., 2019; Karlsen et al., 2017	Zhang, Pan, et al., 2022	-0.000662211	-0.00581361	0.00448919	0.178397	0.047271	-0.101	0.195542
PFDA_prenatal_BMI_both_sexes	Zhang, Lei, et al., 2022; Bloom et al., 2022; Zhang, Pan, et al., 2022; Chen et al., 2019; Karlsen et al., 2017	Jensen et al., 2020	-0.000775149	-0.00302443	0.00147413	0	-0.0449562	-0.135744	0.0458321
PFDA_prenatal_BMI_both_sexes	Zhang, Lei, et al., 2022; Bloom et al., 2022; Zhang, Pan, et al., 2022; Jensen et al., 2020; Karlsen et al., 2017	Chen et al., 2019	-0.00384311	-0.0278885	0.0202023	0.21099	0.0337201	-0.0838019	0.151242
PFDA_prenatal_BMI_both_sexes	Zhang, Lei, et al., 2022; Bloom et al., 2022; Zhang, Pan, et al., 2022; Jensen et al., 2020; Chen et al., 2019	Karlsen et al., 2017	-0.000757668	-0.00319624	0.00168091	0.194136	0.0373544	-0.0770779	0.151787
PFDA_prenatal_BMI_boys	Romano et al., 2022; Zhang, Lei, et al., 2022; Bloom et al., 2022; Zhang, Pan, et al., 2022; Jensen et al., 2020; Chen et al., 2019	NONE	0.0011188	-0.00414301	0.00638061	0	0.0234909	-0.103462	0.150443
PFDA_prenatal_BMI_boys	Zhang, Lei, et al., 2022; Bloom et al., 2022; Zhang, Pan, et al., 2022; Jensen et al., 2020; Chen et al., 2019	Romano et al., 2022	0.00138396	-0.00397386	0.00674178	0	0.0365882	-0.136512	0.209688
PFDA_prenatal_BMI_boys	Romano et al., 2022; Bloom et al., 2022; Zhang, Pan, et al., 2022; Jensen et al., 2020; Chen et al., 2019	Zhang, Lei, et al., 2022	0.00117272	-0.00410048	0.00644591	0	0.0354738	-0.130734	0.201682
PFDA_prenatal_BMI_boys	Romano et al., 2022; Zhang, Lei, et al., 2022; Zhang, Pan, et al., 2022; Jensen et al., 2020; Chen et al., 2019	Bloom et al., 2022	0.00111986	-0.00414209	0.00638182	0	0.0410809	-0.0677889	0.149951
PFDA_prenatal_BMI_boys	Romano et al., 2022; Zhang, Lei, et al., 2022; Bloom et al., 2022; Jensen et al., 2020; Chen et al., 2019	Zhang, Pan, et al., 2022	0.0013656	-0.00395897	0.00669016	0	0.0497708	-0.170476	0.270018
PFDA_prenatal_BMI_boys	Romano et al., 2022; Zhang, Lei, et al., 2022; Bloom et al., 2022; Zhang, Pan, et al., 2022; Chen et al., 2019	Jensen et al., 2020	0.00109733	-0.00416472	0.00635938	0	-0.00916237	-0.153736	0.135411
PFDA_prenatal_BMI_boys	Romano et al., 2022; Zhang, Lei, et al., 2022; Bloom et al., 2022; Zhang, Pan, et al., 2022; Jensen et al., 2020	Chen et al., 2019	-0.00724023	-0.0281364	0.0136559	0	0.0354836	-0.137915	0.208883
PFDA_prenatal_BMI_girls	Romano et al., 2022; Zhang, Lei, et al., 2022; Bloom et al., 2022; Zhang, Pan, et al., 2022; Jensen et al., 2020; Chen et al., 2019	NONE	-0.00153553	-0.00650911	0.00343804	0.101738	0.0329021	-0.0814829	0.147287
PFDA_prenatal_BMI_girls	Zhang, Lei, et al., 2022; Bloom et al., 2022; Zhang, Pan, et al., 2022; Jensen et al., 2020; Chen et al., 2019	Romano et al., 2022	-0.00150703	-0.00666691	0.00365286	0.273205	0.047216	-0.11218	0.206612
PFDA_prenatal_BMI_girls	Romano et al., 2022; Bloom et al., 2022; Zhang, Pan, et al., 2022; Jensen et al., 2020; Chen et al., 2019	Zhang, Lei, et al., 2022	-0.00198907	-0.0060028	0.00202467	0.21342	0.0473119	-0.106803	0.201427
PFDA_prenatal_BMI_girls	Romano et al., 2022; Zhang, Lei, et al., 2022; Zhang, Pan, et al., 2022; Jensen et al., 2020; Chen et al., 2019	Bloom et al., 2022	-0.00143602	-0.0066983	0.00382625	0.113902	0.115097	-0.0026287	0.232823
PFDA_prenatal_BMI_girls	Romano et al., 2022; Zhang, Lei, et al., 2022; Bloom et al., 2022; Jensen et al., 2020; Chen et al., 2019	Zhang, Pan, et al., 2022	-0.00191994	-0.00606393	0.00222405	0.21763	0.0597176	-0.144737	0.264173
PFDA_prenatal_BMI_girls	Romano et al., 2022; Zhang, Lei, et al., 2022; Bloom et al., 2022; Zhang, Pan, et al., 2022; Chen et al., 2019	Jensen et al., 2020	-0.00169757	-0.00612873	0.00273359	0	-0.0546015	-0.176161	0.0669582
PFDA_prenatal_BMI_girls	Romano et al., 2022; Zhang, Lei, et al., 2022; Bloom et al., 2022; Zhang, Pan, et al., 2022; Jensen et al., 2020	Chen et al., 2019	0.00835631	-0.0116228	0.0283354	0.116035	0.0504841	-0.110324	0.211292
PFUA_prenatal_BMI_both_sexes	Zhang, Lei, et al., 2022; Bloom et al., 2022; Zhang, Pan, et al., 2022; Chen et al., 2019; Vrijheid et al., 2020	NONE	-0.00157377	-0.00481098	0.00166344	0	-0.206171	-0.645676	0.233335
PFUA_prenatal_BMI_both_sexes	Bloom et al., 2022; Zhang, Pan, et al., 2022; Chen et al., 2019; Vrijheid et al., 2020	Zhang, Lei, et al., 2022	-0.00160513	-0.00485042	0.00164015	0	-0.211564	-0.682039	0.258911
PFUA_prenatal_BMI_both_sexes	Zhang, Lei, et al., 2022; Zhang, Pan, et al., 2022; Chen et al., 2019; Vrijheid et al., 2020	Bloom et al., 2022	-0.0015762	-0.00481345	0.00166105	0	-0.250393	-0.747635	0.246848
PFUA_prenatal_BMI_both_sexes	Zhang, Lei, et al., 2022; Bloom et al., 2022; Chen et al., 2019; Vrijheid et al., 2020	Zhang, Pan, et al., 2022	-0.00154547	-0.00479466	0.00170372	0	-0.284158	-0.923473	0.355156
PFUA_prenatal_BMI_both_sexes	Zhang, Lei, et al., 2022; Bloom et al., 2022; Zhang, Pan, et al., 2022; Vrijheid et al., 2020	Chen et al., 2019	-0.00138253	-0.030497	0.0277319	0	-0.220492	-0.712614	0.271629
PFUA_prenatal_BMI_both_sexes	Zhang, Lei, et al., 2022; Bloom et al., 2022; Zhang, Pan, et al., 2022; Chen et al., 2019	Vrijheid et al., 2020	-0.00157059	-0.00480781	0.00166662	0	0.0190223	-0.129849	0.167893
PFUA_prenatal_BMI_boys	Romano et al., 2022; Zhang, Lei, et al., 2022; Bloom et al., 2022; Zhang, Pan, et al., 2022; Chen et al., 2019	NONE	0.00187366	-0.00545368	0.009201	0	0.0860229	-0.0909676	0.263013
PFUA_prenatal_BMI_boys	Zhang, Lei, et al., 2022; Bloom et al., 2022; Zhang, Pan, et al., 2022; Chen et al., 2019	Romano et al., 2022	0.00182741	-0.00565432	0.00930915	0	0.127151	-0.127197	0.3815
PFUA_prenatal_BMI_boys	Romano et al., 2022; Bloom et al., 2022; Zhang, Pan, et al., 2022; Chen et al., 2019	Zhang, Lei, et al., 2022	0.00177582	-0.00557295	0.0091246	0	0.119301	-0.122789	0.361391
PFUA_prenatal_BMI_boys	Romano et al., 2022; Zhang, Lei, et al., 2022; Zhang, Pan, et al., 2022; Chen et al., 2019	Bloom et al., 2022	0.00184877	-0.00547874	0.00917629	0	0.00101322	-0.0224417	0.0244682
PFUA_prenatal_BMI_boys	Romano et al., 2022; Zhang, Lei, et al., 2022; Bloom et al., 2022; Chen et al., 2019	Zhang, Pan, et al., 2022	0.00215835	-0.00531121	0.00962791	0	0.177023	-0.168409	0.522455
PFUA_prenatal_BMI_boys	Romano et al., 2022; Zhang, Lei, et al., 2022; Bloom et al., 2022; Zhang, Pan, et al., 2022	Chen et al., 2019	0.00060108	-0.0246157	0.0258179	0	0.127551	-0.127333	0.382435
PFUA_prenatal_BMI_girls	Romano et al., 2022; Zhang, Lei, et al., 2022; Bloom et al., 2022; Zhang, Pan, et al., 2022; Chen et al., 2019	NONE	-0.00408891	-0.00936126	0.00118344	0	-0.00818284	-0.141756	0.12539
PFUA_prenatal_BMI_girls	Zhang, Lei, et al., 2022; Bloom et al., 2022; Zhang, Pan, et al., 2022; Chen et al., 2019	Romano et al., 2022	-0.00406238	-0.00933625	0.00121149	0	-0.013901	-0.204726	0.176924
PFUA_prenatal_BMI_girls	Romano et al., 2022; Bloom et al., 2022; Zhang, Pan, et al., 2022; Chen et al., 2019	Zhang, Lei, et al., 2022	-0.000716825	-0.017779	0.0163453	0	-0.0205355	-0.204482	0.163411
PFUA_prenatal_BMI_girls	Romano et al., 2022; Zhang, Lei, et al., 2022; Zhang, Pan, et al., 2022; Chen et al., 2019	Bloom et al., 2022	-0.00408525	-0.00935772	0.00118721	0	-0.0025347	-0.0508002	0.0457308
PFUA_prenatal_BMI_girls	Romano et al., 2022; Zhang, Lei, et al., 2022; Bloom et al., 2022; Chen et al., 2019	Zhang, Pan, et al., 2022	-0.00453275	-0.00985053	0.000785017	0	-0.0447271	-0.306698	0.217244
PFUA_prenatal_BMI_girls	Romano et al., 2022; Zhang, Lei, et al., 2022; Bloom et al., 2022; Zhang, Pan, et al., 2022	Chen et al., 2019	0.000539283	-0.0315378	0.0326163	0	-0.0225551	-0.216393	0.171283
PFDoA_prenatal_BMI_both_sexes	Zhang, Lei, et al., 2022; Zhang, Pan, et al., 2022; Chen et al., 2019	NONE	0.015428	-0.0305934	0.0614495	0.504218	0.0433343	-0.0221278	0.108796
PFDoA_prenatal_BMI_both_sexes	Zhang, Pan, et al., 2022; Chen et al., 2019	Zhang, Lei, et al., 2022	0.0214787	-0.0333701	0.0763275	0.736884	0.0410088	-0.0258774	0.107895
PFDoA_prenatal_BMI_both_sexes	Zhang, Lei, et al., 2022; Chen et al., 2019	Zhang, Pan, et al., 2022	-0.000101184	-0.00649186	0.00628949	0	-0.0169293	-0.0866679	0.0528094
PFDoA_prenatal_BMI_both_sexes	Zhang, Lei, et al., 2022; Zhang, Pan, et al., 2022	Chen et al., 2019	0.0411617	-0.0312679	0.113591	0.159518	0.0355438	-0.0377211	0.108809
PFDoA_prenatal_BMI_boys	Zhang, Lei, et al., 2022; Zhang, Pan, et al., 2022; Chen et al., 2019	NONE	0.0223022	-0.0243619	0.0689663	0.339494	0.0441686	-0.0186737	0.107011
PFDoA_prenatal_BMI_boys	Zhang, Pan, et al., 2022; Chen et al., 2019	Zhang, Lei, et al., 2022	0.0238558	-0.0253358	0.0730475	0.663149	0.0425521	-0.0187889	0.103893
PFDoA_prenatal_BMI_boys	Zhang, Lei, et al., 2022; Chen et al., 2019	Zhang, Pan, et al., 2022	0.00526568	-0.00963072	0.0201621	0	-0.0123182	-0.165546	0.140909
PFDoA_prenatal_BMI_boys	Zhang, Lei, et al., 2022; Zhang, Pan, et al., 2022	Chen et al., 2019	0.0555507	-0.00160539	0.112707	0	0.0362112	-0.0585145	0.130937
PFDoA_prenatal_BMI_girls	Zhang, Lei, et al., 2022; Zhang, Pan, et al., 2022; Chen et al., 2019	NONE	0.00538856	-0.0249606	0.0357377	0.341838	0.028438	-0.0187966	0.0756727
PFDoA_prenatal_BMI_girls	Zhang, Pan, et al., 2022; Chen et al., 2019	Zhang, Lei, et al., 2022	0.0106878	-0.0284827	0.0498582	0.641995	0.0263087	-0.0234082	0.0760256
PFDoA_prenatal_BMI_girls	Zhang, Lei, et al., 2022; Chen et al., 2019	Zhang, Pan, et al., 2022	-0.00390718	-0.0150213	0.00720689	0	-0.013802	-0.0578111	0.0302072
PFDoA_prenatal_BMI_girls	Zhang, Lei, et al., 2022; Zhang, Pan, et al., 2022	Chen et al., 2019	0.0221845	-0.0341376	0.0785066	0.219495	0.023579	-0.0328112	0.0799693
PFBS_prenatal_BMI_both_sexes	Zhang, Lei, et al., 2022; Zhang, Pan, et al., 2022; Chen et al., 2019	NONE	0.00112516	-0.00733032	0.00958063	0.516419	-0.0555067	-0.119565	0.00855176
PFBS_prenatal_BMI_both_sexes	Zhang, Pan, et al., 2022; Chen et al., 2019	Zhang, Lei, et al., 2022	-0.0255675	-0.0945472	0.0434123	0.749932	-0.0495898	-0.133108	0.033928
PFBS_prenatal_BMI_both_sexes	Zhang, Lei, et al., 2022; Chen et al., 2019	Zhang, Pan, et al., 2022	0.00210404	-0.00548313	0.00969121	0	0.00478673	-0.012872	0.0224454
PFBS_prenatal_BMI_both_sexes	Zhang, Lei, et al., 2022; Zhang, Pan, et al., 2022	Chen et al., 2019	-0.0254895	-0.102769	0.0517899	0.725512	-0.0526707	-0.146535	0.0411937
PFBS_prenatal_BMI_boys	Zhang, Lei, et al., 2022; Zhang, Pan, et al., 2022; Chen et al., 2019	NONE	-0.0135474	-0.0533126	0.0262178	0.47167	-0.055159	-0.125643	0.015325
PFBS_prenatal_BMI_boys	Zhang, Pan, et al., 2022; Chen et al., 2019	Zhang, Lei, et al., 2022	-0.0283024	-0.0907337	0.034129	0.687175	-0.0513804	-0.128476	0.0257156
PFBS_prenatal_BMI_boys	Zhang, Lei, et al., 2022; Chen et al., 2019	Zhang, Pan, et al., 2022	-0.00316671	-0.0197365	0.0134031	0	0.0075088	-0.0274284	0.042446
PFBS_prenatal_BMI_boys	Zhang, Lei, et al., 2022; Zhang, Pan, et al., 2022	Chen et al., 2019	-0.0252854	-0.118047	0.0674762	0.66909	-0.0490537	-0.152858	0.0547504
PFBS_prenatal_BMI_girls	Zhang, Lei, et al., 2022; Zhang, Pan, et al., 2022; Chen et al., 2019	NONE	0.00233951	-0.00260065	0.00727968	0.522616	-0.0556746	-0.117835	0.00648606
PFBS_prenatal_BMI_girls	Zhang, Pan, et al., 2022; Chen et al., 2019	Zhang, Lei, et al., 2022	-0.0252028	-0.094931	0.0445254	0.757253	-0.0494077	-0.133745	0.0349301
PFBS_prenatal_BMI_girls	Zhang, Lei, et al., 2022; Chen et al., 2019	Zhang, Pan, et al., 2022	0.00264829	-0.000788027	0.0060846	0	0.00440809	-0.00958111	0.0183973
PFBS_prenatal_BMI_girls	Zhang, Lei, et al., 2022; Zhang, Pan, et al., 2022	Chen et al., 2019	-0.0253711	-0.100424	0.0496816	0.736079	-0.0532684	-0.146128	0.0395909
PFOA_prenatal_risk_both_sexes	Bloom et al., 2022; Martinsson et al., 2020; Lauritzen et al., 2018; Mora et al., 2017; Braun et al., 2016; Karlsen et al., 2017; Manzano-Salgado et al., 2017; Hoyer et al., 2015 - Greenland; Hoyer et al., 2015 - Ukraine	NONE	0.00841743	-0.00031358	0.0171484	0.0239867	0.0141879	-0.000559002	0.0289347
PFOA_prenatal_risk_both_sexes	Martinsson et al., 2020; Lauritzen et al., 2018; Mora et al., 2017; Braun et al., 2016; Karlsen et al., 2017; Manzano-Salgado et al., 2017; Hoyer et al., 2015 - Greenland; Hoyer et al., 2015 - Ukraine	Bloom et al., 2022	0.012099	0.00109236	0.0231057	0.00316823	0.0183826	0.00197858	0.0347867
PFOA_prenatal_risk_both_sexes	Bloom et al., 2022; Lauritzen et al., 2018; Mora et al., 2017; Braun et al., 2016; Karlsen et al., 2017; Manzano-Salgado et al., 2017; Hoyer et al., 2015 - Greenland; Hoyer et al., 2015 - Ukraine	Martinsson et al., 2020	0.00817515	-0.00067107	0.0170214	0.135894	0.016516	0.00147828	0.0315537
PFOA_prenatal_risk_both_sexes	Bloom et al., 2022; Martinsson et al., 2020; Mora et al., 2017; Braun et al., 2016; Karlsen et al., 2017; Manzano-Salgado et al., 2017; Hoyer et al., 2015 - Greenland; Hoyer et al., 2015 - Ukraine	Lauritzen et al., 2018	0.00716586	-0.00151991	0.0158516	0	0.00990001	-0.00450499	0.024305
PFOA_prenatal_risk_both_sexes	Bloom et al., 2022; Martinsson et al., 2020; Lauritzen et al., 2018; Braun et al., 2016; Karlsen et al., 2017; Manzano-Salgado et al., 2017; Hoyer et al., 2015 - Greenland; Hoyer et al., 2015 - Ukraine	Mora et al., 2017	0.0110368	0.000254303	0.0218194	0.0888108	0.0187956	0.00192678	0.0356644
PFOA_prenatal_risk_both_sexes	Bloom et al., 2022; Martinsson et al., 2020; Lauritzen et al., 2018; Mora et al., 2017; Karlsen et al., 2017; Manzano-Salgado et al., 2017; Hoyer et al., 2015 - Greenland; Hoyer et al., 2015 - Ukraine	Braun et al., 2016	0.00683867	-0.0024762	0.0161535	0.0675615	0.016438	0.000698772	0.0321773
PFOA_prenatal_risk_both_sexes	Bloom et al., 2022; Martinsson et al., 2020; Lauritzen et al., 2018; Mora et al., 2017; Braun et al., 2016; Manzano-Salgado et al., 2017; Hoyer et al., 2015 - Greenland; Hoyer et al., 2015 - Ukraine	Karlsen et al., 2017	0.0067861	-0.00241241	0.0159846	0	0.0152228	-0.000433675	0.0308794
PFOA_prenatal_risk_both_sexes	Bloom et al., 2022; Martinsson et al., 2020; Lauritzen et al., 2018; Mora et al., 2017; Braun et al., 2016; Karlsen et al., 2017; Hoyer et al., 2015 - Greenland; Hoyer et al., 2015 - Ukraine	Manzano-Salgado et al., 2017	0.0102509	1.13943e-05	0.0204903	0.112075	0.0190748	0.00208368	0.036066
PFOA_prenatal_risk_both_sexes	Bloom et al., 2022; Martinsson et al., 2020; Lauritzen et al., 2018; Mora et al., 2017; Braun et al., 2016; Karlsen et al., 2017; Manzano-Salgado et al., 2017; Hoyer et al., 2015 - Ukraine	Hoyer et al., 2015 - Greenland	0.00819208	-0.000693829	0.017078	0.136334	0.0165733	0.000893722	0.0322528
PFOA_prenatal_risk_both_sexes	Bloom et al., 2022; Martinsson et al., 2020; Lauritzen et al., 2018; Mora et al., 2017; Braun et al., 2016; Karlsen et al., 2017; Manzano-Salgado et al., 2017; Hoyer et al., 2015 - Greenland	Hoyer et al., 2015 - Ukraine	0.00854319	-0.000319444	0.0174058	0.144592	0.0178854	0.00332621	0.0324446
PFOS_prenatal_risk_both_sexes	Bloom et al., 2022; Martinsson et al., 2020; Lauritzen et al., 2018; Mora et al., 2017; Braun et al., 2016; Karlsen et al., 2017; Manzano-Salgado et al., 2017; Hoyer et al., 2015 - Greenland; Hoyer et al., 2015 - Ukraine	NONE	0.000709039	-0.00115453	0.00257261	0.190737	0.00157507	-0.00180495	0.00495509
PFOS_prenatal_risk_both_sexes	Martinsson et al., 2020; Lauritzen et al., 2018; Mora et al., 2017; Braun et al., 2016; Karlsen et al., 2017; Manzano-Salgado et al., 2017; Hoyer et al., 2015 - Greenland; Hoyer et al., 2015 - Ukraine	Bloom et al., 2022	0.0011604	-0.00128901	0.00360982	0.16664	0.00209105	-0.00182808	0.00601017
PFOS_prenatal_risk_both_sexes	Bloom et al., 2022; Lauritzen et al., 2018; Mora et al., 2017; Braun et al., 2016; Karlsen et al., 2017; Manzano-Salgado et al., 2017; Hoyer et al., 2015 - Greenland; Hoyer et al., 2015 - Ukraine	Martinsson et al., 2020	-0.000178009	-0.00167862	0.00132261	0	0.00139553	-0.00253656	0.00532762
PFOS_prenatal_risk_both_sexes	Bloom et al., 2022; Martinsson et al., 2020; Mora et al., 2017; Braun et al., 2016; Karlsen et al., 2017; Manzano-Salgado et al., 2017; Hoyer et al., 2015 - Greenland; Hoyer et al., 2015 - Ukraine	Lauritzen et al., 2018	0.000597455	-0.00126287	0.00245778	0.17886	0.000808693	-0.00251231	0.0041297
PFOS_prenatal_risk_both_sexes	Bloom et al., 2022; Martinsson et al., 2020; Lauritzen et al., 2018; Braun et al., 2016; Karlsen et al., 2017; Manzano-Salgado et al., 2017; Hoyer et al., 2015 - Greenland; Hoyer et al., 2015 - Ukraine	Mora et al., 2017	0.000355557	-0.00162416	0.00233527	0.174251	0.0016068	-0.00232757	0.00554118
PFOS_prenatal_risk_both_sexes	Bloom et al., 2022; Martinsson et al., 2020; Lauritzen et al., 2018; Mora et al., 2017; Karlsen et al., 2017; Manzano-Salgado et al., 2017; Hoyer et al., 2015 - Greenland; Hoyer et al., 2015 - Ukraine	Braun et al., 2016	0.00110611	-0.001312	0.00352422	0.228667	0.00194861	-0.00178948	0.00568669
PFOS_prenatal_risk_both_sexes	Bloom et al., 2022; Martinsson et al., 2020; Lauritzen et al., 2018; Mora et al., 2017; Braun et al., 2016; Manzano-Salgado et al., 2017; Hoyer et al., 2015 - Greenland; Hoyer et al., 2015 - Ukraine	Karlsen et al., 2017	0.000741772	-0.00119375	0.00267729	0.291276	0.00193237	-0.00182438	0.00568911
PFOS_prenatal_risk_both_sexes	Bloom et al., 2022; Martinsson et al., 2020; Lauritzen et al., 2018; Mora et al., 2017; Braun et al., 2016; Karlsen et al., 2017; Hoyer et al., 2015 - Greenland; Hoyer et al., 2015 - Ukraine	Manzano-Salgado et al., 2017	0.000828278	-0.00108485	0.00274141	0.255221	0.00268091	-0.000910049	0.00627187
PFOS_prenatal_risk_both_sexes	Bloom et al., 2022; Martinsson et al., 2020; Lauritzen et al., 2018; Mora et al., 2017; Braun et al., 2016; Karlsen et al., 2017; Manzano-Salgado et al., 2017; Hoyer et al., 2015 - Ukraine	Hoyer et al., 2015 - Greenland	0.00106871	-0.00105579	0.00319321	0.218662	0.00215977	-0.00168708	0.00600662
PFOS_prenatal_risk_both_sexes	Bloom et al., 2022; Martinsson et al., 2020; Lauritzen et al., 2018; Mora et al., 2017; Braun et al., 2016; Karlsen et al., 2017; Manzano-Salgado et al., 2017; Hoyer et al., 2015 - Greenland	Hoyer et al., 2015 - Ukraine	0.000676121	-0.00120429	0.00255654	0.278127	0.00138938	-0.00167839	0.00445715
PFHxS_prenatal_risk_both_sexes	Bloom et al., 2022; Martinsson et al., 2020; Mora et al., 2017; Braun et al., 2016; Karlsen et al., 2017; Manzano-Salgado et al., 2017	NONE	-0.0034688	-0.023545	0.0166074	0.413714	-0.0626762	-0.120149	-0.00520341
PFHxS_prenatal_risk_both_sexes	Martinsson et al., 2020; Mora et al., 2017; Braun et al., 2016; Karlsen et al., 2017; Manzano-Salgado et al., 2017	Bloom et al., 2022	0.00292598	-0.0139962	0.0198481	0.438861	-0.0563697	-0.117767	0.00502716
PFHxS_prenatal_risk_both_sexes	Bloom et al., 2022; Mora et al., 2017; Braun et al., 2016; Karlsen et al., 2017; Manzano-Salgado et al., 2017	Martinsson et al., 2020	-0.000348422	-0.0179453	0.0172485	0	-0.00427282	-0.0283917	0.0198461
PFHxS_prenatal_risk_both_sexes	Bloom et al., 2022; Martinsson et al., 2020; Braun et al., 2016; Karlsen et al., 2017; Manzano-Salgado et al., 2017	Mora et al., 2017	-0.0161228	-0.0445783	0.0123327	0.419776	-0.06439	-0.129079	0.000299051
PFHxS_prenatal_risk_both_sexes	Bloom et al., 2022; Martinsson et al., 2020; Mora et al., 2017; Karlsen et al., 2017; Manzano-Salgado et al., 2017	Braun et al., 2016	-0.00847107	-0.032611	0.0156689	0.481108	-0.0595721	-0.115508	-0.00363618
PFHxS_prenatal_risk_both_sexes	Bloom et al., 2022; Martinsson et al., 2020; Mora et al., 2017; Braun et al., 2016; Manzano-Salgado et al., 2017	Karlsen et al., 2017	-0.00675526	-0.0302296	0.0167191	0.512376	-0.0617	-0.119119	-0.00428135
PFHxS_prenatal_risk_both_sexes	Bloom et al., 2022; Martinsson et al., 2020; Mora et al., 2017; Braun et al., 2016; Karlsen et al., 2017	Manzano-Salgado et al., 2017	0.00148343	-0.0159892	0.0189561	0.448229	-0.0564189	-0.118847	0.0060093
PFNA_prenatal_risk_both_sexes	Bloom et al., 2022; Martinsson et al., 2020; Mora et al., 2017; Braun et al., 2016; Karlsen et al., 2017; Manzano-Salgado et al., 2017	NONE	0.0250015	-0.0116055	0.0616086	0.0227201	-0.0633398	-0.161085	0.0344056
PFNA_prenatal_risk_both_sexes	Martinsson et al., 2020; Mora et al., 2017; Braun et al., 2016; Karlsen et al., 2017; Manzano-Salgado et al., 2017	Bloom et al., 2022	0.020106	-0.0238581	0.0640701	0.193404	-0.0637643	-0.170985	0.0434561
PFNA_prenatal_risk_both_sexes	Bloom et al., 2022; Mora et al., 2017; Braun et al., 2016; Karlsen et al., 2017; Manzano-Salgado et al., 2017	Martinsson et al., 2020	0.0292282	-0.00756681	0.0660232	0	0.0384	-0.0191801	0.0959802
PFNA_prenatal_risk_both_sexes	Bloom et al., 2022; Martinsson et al., 2020; Braun et al., 2016; Karlsen et al., 2017; Manzano-Salgado et al., 2017	Mora et al., 2017	0.0240534	-0.0133949	0.0615016	0.209614	-0.0688859	-0.171082	0.0333101
PFNA_prenatal_risk_both_sexes	Bloom et al., 2022; Martinsson et al., 2020; Mora et al., 2017; Karlsen et al., 2017; Manzano-Salgado et al., 2017	Braun et al., 2016	0.0238998	-0.0130901	0.0608897	0.190882	-0.0599626	-0.154468	0.0345428
PFNA_prenatal_risk_both_sexes	Bloom et al., 2022; Martinsson et al., 2020; Mora et al., 2017; Braun et al., 2016; Manzano-Salgado et al., 2017	Karlsen et al., 2017	0.0283168	-0.0151258	0.0717595	0.206117	-0.0561297	-0.158916	0.0466564
PFNA_prenatal_risk_both_sexes	Bloom et al., 2022; Martinsson et al., 2020; Mora et al., 2017; Braun et al., 2016; Karlsen et al., 2017	Manzano-Salgado et al., 2017	0.0232622	-0.0215823	0.0681066	0.21552	-0.0675321	-0.180797	0.0457328
PFOA_prenatal_WC_both_sexes	Papadopoulou et al., 2021; Zhang, Lei, et al., 2022; Bloom et al., 2022; Liu et al., 2020; Mora et al., 2017; Jensen et al., 2020; Chen et al., 2019; Manzano-Salgado et al., 2017	NONE	-1.80606e-05	-8.22877e-05	4.61666e-05	0	0.00172441	-0.0152012	0.01865
PFOA_prenatal_WC_both_sexes	Zhang, Lei, et al., 2022; Bloom et al., 2022; Liu et al., 2020; Mora et al., 2017; Jensen et al., 2020; Chen et al., 2019; Manzano-Salgado et al., 2017	Papadopoulou et al., 2021	-1.80714e-05	-8.22986e-05	4.61558e-05	0	0.000574993	-0.0119902	0.0131402
PFOA_prenatal_WC_both_sexes	Papadopoulou et al., 2021; Bloom et al., 2022; Liu et al., 2020; Mora et al., 2017; Jensen et al., 2020; Chen et al., 2019; Manzano-Salgado et al., 2017	Zhang, Lei, et al., 2022	-3.97305e-06	-8.00471e-05	7.2101e-05	0	0.00213611	-0.0133561	0.0176284
PFOA_prenatal_WC_both_sexes	Papadopoulou et al., 2021; Zhang, Lei, et al., 2022; Liu et al., 2020; Mora et al., 2017; Jensen et al., 2020; Chen et al., 2019; Manzano-Salgado et al., 2017	Bloom et al., 2022	-1.81301e-05	-8.23576e-05	4.60975e-05	0	0.00137176	-0.0149095	0.0176531
PFOA_prenatal_WC_both_sexes	Papadopoulou et al., 2021; Zhang, Lei, et al., 2022; Bloom et al., 2022; Mora et al., 2017; Jensen et al., 2020; Chen et al., 2019; Manzano-Salgado et al., 2017	Liu et al., 2020	-1.87652e-05	-8.30013e-05	4.54709e-05	0	0.0019302	-0.0135768	0.0174372
PFOA_prenatal_WC_both_sexes	Papadopoulou et al., 2021; Zhang, Lei, et al., 2022; Bloom et al., 2022; Liu et al., 2020; Jensen et al., 2020; Chen et al., 2019; Manzano-Salgado et al., 2017	Mora et al., 2017	-2.78645e-05	-9.4584e-05	3.88549e-05	0	0.00230832	-0.0146097	0.0192263
PFOA_prenatal_WC_both_sexes	Papadopoulou et al., 2021; Zhang, Lei, et al., 2022; Bloom et al., 2022; Liu et al., 2020; Mora et al., 2017; Chen et al., 2019; Manzano-Salgado et al., 2017	Jensen et al., 2020	-1.80742e-05	-8.23014e-05	4.6153e-05	0	0.00083064	-0.01357	0.0152312
PFOA_prenatal_WC_both_sexes	Papadopoulou et al., 2021; Zhang, Lei, et al., 2022; Bloom et al., 2022; Liu et al., 2020; Mora et al., 2017; Jensen et al., 2020; Manzano-Salgado et al., 2017	Chen et al., 2019	-1.88533e-06	-0.000160546	0.000156775	0	0.00220334	-0.013799	0.0182057
PFOA_prenatal_WC_both_sexes	Papadopoulou et al., 2021; Zhang, Lei, et al., 2022; Bloom et al., 2022; Liu et al., 2020; Mora et al., 2017; Jensen et al., 2020; Chen et al., 2019	Manzano-Salgado et al., 2017	-1.80385e-05	-8.22658e-05	4.61887e-05	0	0.00448411	-0.0102864	0.0192546
PFOA_prenatal_WC_boys	Zhang, Lei, et al., 2022; Bloom et al., 2022; Liu et al., 2020; Andersen et al., 2013; Mora et al., 2017; Jensen et al., 2020; Chen et al., 2019; Manzano-Salgado et al., 2017	NONE	-5.98425e-05	-0.00023538	0.000115695	0	0.00185266	-0.0177087	0.021414
PFOA_prenatal_WC_boys	Bloom et al., 2022; Liu et al., 2020; Andersen et al., 2013; Mora et al., 2017; Jensen et al., 2020; Chen et al., 2019; Manzano-Salgado et al., 2017	Zhang, Lei, et al., 2022	-2.02853e-06	-5.39973e-05	4.99402e-05	0	0.00216228	-0.0162616	0.0205862
PFOA_prenatal_WC_boys	Zhang, Lei, et al., 2022; Liu et al., 2020; Andersen et al., 2013; Mora et al., 2017; Jensen et al., 2020; Chen et al., 2019; Manzano-Salgado et al., 2017	Bloom et al., 2022	-6.00469e-05	-0.000235839	0.000115746	0	0.00197397	-0.0171906	0.0211385
PFOA_prenatal_WC_boys	Zhang, Lei, et al., 2022; Bloom et al., 2022; Andersen et al., 2013; Mora et al., 2017; Jensen et al., 2020; Chen et al., 2019; Manzano-Salgado et al., 2017	Liu et al., 2020	-6.15838e-05	-0.000239829	0.000116662	0	0.00212004	-0.016215	0.0204551
PFOA_prenatal_WC_boys	Zhang, Lei, et al., 2022; Bloom et al., 2022; Liu et al., 2020; Mora et al., 2017; Jensen et al., 2020; Chen et al., 2019; Manzano-Salgado et al., 2017	Andersen et al., 2013	-5.8981e-05	-0.000233474	0.000115512	0	0.0059311	-0.0125129	0.0243751
PFOA_prenatal_WC_boys	Zhang, Lei, et al., 2022; Bloom et al., 2022; Liu et al., 2020; Andersen et al., 2013; Jensen et al., 2020; Chen et al., 2019; Manzano-Salgado et al., 2017	Mora et al., 2017	-6.31971e-05	-0.00029225	0.000165856	0	0.00236974	-0.0178116	0.0225511
PFOA_prenatal_WC_boys	Zhang, Lei, et al., 2022; Bloom et al., 2022; Liu et al., 2020; Andersen et al., 2013; Mora et al., 2017; Chen et al., 2019; Manzano-Salgado et al., 2017	Jensen et al., 2020	-6.02708e-05	-0.000236326	0.000115784	0	-0.002251	-0.0182294	0.0137274
PFOA_prenatal_WC_boys	Zhang, Lei, et al., 2022; Bloom et al., 2022; Liu et al., 2020; Andersen et al., 2013; Mora et al., 2017; Jensen et al., 2020; Manzano-Salgado et al., 2017	Chen et al., 2019	-0.000217987	-0.000521041	8.50673e-05	0	0.00221001	-0.0168274	0.0212474
PFOA_prenatal_WC_boys	Zhang, Lei, et al., 2022; Bloom et al., 2022; Liu et al., 2020; Andersen et al., 2013; Mora et al., 2017; Jensen et al., 2020; Chen et al., 2019	Manzano-Salgado et al., 2017	-5.99363e-05	-0.000235589	0.000115716	0	0.00130478	-0.0136903	0.0162999
PFOA_prenatal_WC_girls	Zhang, Lei, et al., 2022; Bloom et al., 2022; Hartman et al., 2017; Liu et al., 2020; Andersen et al., 2013; Mora et al., 2017; Jensen et al., 2020; Chen et al., 2019; Manzano-Salgado et al., 2017	NONE	-8.52065e-06	-7.7679e-05	6.06377e-05	0.354222	-0.00464376	-0.0207158	0.0114283
PFOA_prenatal_WC_girls	Bloom et al., 2022; Hartman et al., 2017; Liu et al., 2020; Andersen et al., 2013; Mora et al., 2017; Jensen et al., 2020; Chen et al., 2019; Manzano-Salgado et al., 2017	Zhang, Lei, et al., 2022	7.23331e-06	-0.000256716	0.000271183	0.43085	-0.00367295	-0.0188968	0.0115509
PFOA_prenatal_WC_girls	Zhang, Lei, et al., 2022; Hartman et al., 2017; Liu et al., 2020; Andersen et al., 2013; Mora et al., 2017; Jensen et al., 2020; Chen et al., 2019; Manzano-Salgado et al., 2017	Bloom et al., 2022	-8.59804e-06	-7.77567e-05	6.05606e-05	0.405392	-0.00522826	-0.0210175	0.0105609
PFOA_prenatal_WC_girls	Zhang, Lei, et al., 2022; Bloom et al., 2022; Liu et al., 2020; Andersen et al., 2013; Mora et al., 2017; Jensen et al., 2020; Chen et al., 2019; Manzano-Salgado et al., 2017	Hartman et al., 2017	-5.5174e-06	-7.47174e-05	6.36826e-05	0	-0.00355687	-0.0196917	0.012578
PFOA_prenatal_WC_girls	Zhang, Lei, et al., 2022; Bloom et al., 2022; Hartman et al., 2017; Andersen et al., 2013; Mora et al., 2017; Jensen et al., 2020; Chen et al., 2019; Manzano-Salgado et al., 2017	Liu et al., 2020	-9.02e-06	-7.81819e-05	6.01419e-05	0.32689	-0.00407866	-0.0193873	0.0112299
PFOA_prenatal_WC_girls	Zhang, Lei, et al., 2022; Bloom et al., 2022; Hartman et al., 2017; Liu et al., 2020; Mora et al., 2017; Jensen et al., 2020; Chen et al., 2019; Manzano-Salgado et al., 2017	Andersen et al., 2013	-8.52843e-06	-7.76869e-05	6.063e-05	0.434085	-0.00440866	-0.0194314	0.0106141
PFOA_prenatal_WC_girls	Zhang, Lei, et al., 2022; Bloom et al., 2022; Hartman et al., 2017; Liu et al., 2020; Andersen et al., 2013; Jensen et al., 2020; Chen et al., 2019; Manzano-Salgado et al., 2017	Mora et al., 2017	-2.50175e-05	-9.69982e-05	4.69631e-05	0.283052	-0.00400346	-0.0204679	0.012461
PFOA_prenatal_WC_girls	Zhang, Lei, et al., 2022; Bloom et al., 2022; Hartman et al., 2017; Liu et al., 2020; Andersen et al., 2013; Mora et al., 2017; Chen et al., 2019; Manzano-Salgado et al., 2017	Jensen et al., 2020	-8.51318e-06	-7.76716e-05	6.06452e-05	0.432198	-0.00261977	-0.015168	0.00992842
PFOA_prenatal_WC_girls	Zhang, Lei, et al., 2022; Bloom et al., 2022; Hartman et al., 2017; Liu et al., 2020; Andersen et al., 2013; Mora et al., 2017; Jensen et al., 2020; Manzano-Salgado et al., 2017	Chen et al., 2019	3.1849e-05	-0.000138715	0.000202413	0.406693	-0.00377574	-0.0194567	0.0119053
PFOA_prenatal_WC_girls	Zhang, Lei, et al., 2022; Bloom et al., 2022; Hartman et al., 2017; Liu et al., 2020; Andersen et al., 2013; Mora et al., 2017; Jensen et al., 2020; Chen et al., 2019	Manzano-Salgado et al., 2017	-8.48569e-06	-7.76441e-05	6.06727e-05	0.399784	0.000642947	-0.0122268	0.0135127
PFOS_prenatal_WC_both_sexes	Papadopoulou et al., 2021; Zhang, Lei, et al., 2022; Bloom et al., 2022; Liu et al., 2020; Mora et al., 2017; Jensen et al., 2020; Chen et al., 2019; Manzano-Salgado et al., 2017	NONE	3.93987e-05	-9.21861e-06	8.80161e-05	0	-0.0045045	-0.0116812	0.00267217
PFOS_prenatal_WC_both_sexes	Zhang, Lei, et al., 2022; Bloom et al., 2022; Liu et al., 2020; Mora et al., 2017; Jensen et al., 2020; Chen et al., 2019; Manzano-Salgado et al., 2017	Papadopoulou et al., 2021	3.94599e-05	-9.15753e-06	8.80774e-05	0	-0.00158122	-0.00678771	0.00362526
PFOS_prenatal_WC_both_sexes	Papadopoulou et al., 2021; Bloom et al., 2022; Liu et al., 2020; Mora et al., 2017; Jensen et al., 2020; Chen et al., 2019; Manzano-Salgado et al., 2017	Zhang, Lei, et al., 2022	3.9021e-05	-9.61521e-06	8.76571e-05	0	-0.0042386	-0.0106841	0.00220691
PFOS_prenatal_WC_both_sexes	Papadopoulou et al., 2021; Zhang, Lei, et al., 2022; Liu et al., 2020; Mora et al., 2017; Jensen et al., 2020; Chen et al., 2019; Manzano-Salgado et al., 2017	Bloom et al., 2022	3.98088e-05	-8.81515e-06	8.84327e-05	0	-0.00425289	-0.011117	0.00261127
PFOS_prenatal_WC_both_sexes	Papadopoulou et al., 2021; Zhang, Lei, et al., 2022; Bloom et al., 2022; Mora et al., 2017; Jensen et al., 2020; Chen et al., 2019; Manzano-Salgado et al., 2017	Liu et al., 2020	3.90137e-05	-9.61261e-06	8.76401e-05	0	-0.00428887	-0.0107401	0.00216233
PFOS_prenatal_WC_both_sexes	Papadopoulou et al., 2021; Zhang, Lei, et al., 2022; Bloom et al., 2022; Liu et al., 2020; Jensen et al., 2020; Chen et al., 2019; Manzano-Salgado et al., 2017	Mora et al., 2017	4.98211e-05	-0.000134767	0.000234409	0	-0.00458976	-0.0116301	0.00245059
PFOS_prenatal_WC_both_sexes	Papadopoulou et al., 2021; Zhang, Lei, et al., 2022; Bloom et al., 2022; Liu et al., 2020; Mora et al., 2017; Chen et al., 2019; Manzano-Salgado et al., 2017	Jensen et al., 2020	3.94581e-05	-9.15943e-06	8.80756e-05	0	-0.00301635	-0.00921524	0.00318254
PFOS_prenatal_WC_both_sexes	Papadopoulou et al., 2021; Zhang, Lei, et al., 2022; Bloom et al., 2022; Liu et al., 2020; Mora et al., 2017; Jensen et al., 2020; Manzano-Salgado et al., 2017	Chen et al., 2019	3.88717e-05	-1.14865e-05	8.92298e-05	0	-0.00434017	-0.0109994	0.00231909
PFOS_prenatal_WC_both_sexes	Papadopoulou et al., 2021; Zhang, Lei, et al., 2022; Bloom et al., 2022; Liu et al., 2020; Mora et al., 2017; Jensen et al., 2020; Chen et al., 2019	Manzano-Salgado et al., 2017	1.50426e-05	-0.0012833	0.00131338	0	-0.00467945	-0.0105067	0.00114782
PFOS_prenatal_WC_boys	Zhang, Lei, et al., 2022; Bloom et al., 2022; Liu et al., 2020; Andersen et al., 2013; Mora et al., 2017; Jensen et al., 2020; Chen et al., 2019; Manzano-Salgado et al., 2017	NONE	-6.10621e-06	-7.60167e-05	6.38043e-05	0	-0.00236172	-0.0101044	0.005381
PFOS_prenatal_WC_boys	Bloom et al., 2022; Liu et al., 2020; Andersen et al., 2013; Mora et al., 2017; Jensen et al., 2020; Chen et al., 2019; Manzano-Salgado et al., 2017	Zhang, Lei, et al., 2022	-6.39916e-06	-7.6316e-05	6.35177e-05	0	-0.00237369	-0.00932191	0.00457453
PFOS_prenatal_WC_boys	Zhang, Lei, et al., 2022; Liu et al., 2020; Andersen et al., 2013; Mora et al., 2017; Jensen et al., 2020; Chen et al., 2019; Manzano-Salgado et al., 2017	Bloom et al., 2022	-6.10039e-06	-7.60196e-05	6.38188e-05	0	-0.00238915	-0.00979653	0.00501823
PFOS_prenatal_WC_boys	Zhang, Lei, et al., 2022; Bloom et al., 2022; Andersen et al., 2013; Mora et al., 2017; Jensen et al., 2020; Chen et al., 2019; Manzano-Salgado et al., 2017	Liu et al., 2020	-7.128e-06	-7.70766e-05	6.28206e-05	0	-0.00230175	-0.00922848	0.00462497
PFOS_prenatal_WC_boys	Zhang, Lei, et al., 2022; Bloom et al., 2022; Liu et al., 2020; Mora et al., 2017; Jensen et al., 2020; Chen et al., 2019; Manzano-Salgado et al., 2017	Andersen et al., 2013	-6.01985e-06	-7.59334e-05	6.38937e-05	0	-0.00225187	-0.00967473	0.005171
PFOS_prenatal_WC_boys	Zhang, Lei, et al., 2022; Bloom et al., 2022; Liu et al., 2020; Andersen et al., 2013; Jensen et al., 2020; Chen et al., 2019; Manzano-Salgado et al., 2017	Mora et al., 2017	-1.68964e-05	-0.000140954	0.000107161	0	-0.00245326	-0.010079	0.00517245
PFOS_prenatal_WC_boys	Zhang, Lei, et al., 2022; Bloom et al., 2022; Liu et al., 2020; Andersen et al., 2013; Mora et al., 2017; Chen et al., 2019; Manzano-Salgado et al., 2017	Jensen et al., 2020	-6.02806e-06	-7.59388e-05	6.38827e-05	0	-0.000871952	-0.00723602	0.00549212
PFOS_prenatal_WC_boys	Zhang, Lei, et al., 2022; Bloom et al., 2022; Liu et al., 2020; Andersen et al., 2013; Mora et al., 2017; Jensen et al., 2020; Manzano-Salgado et al., 2017	Chen et al., 2019	5.40299e-07	-8.39873e-05	8.50679e-05	0	-0.00231193	-0.00950532	0.00488147
PFOS_prenatal_WC_boys	Zhang, Lei, et al., 2022; Bloom et al., 2022; Liu et al., 2020; Andersen et al., 2013; Mora et al., 2017; Jensen et al., 2020; Chen et al., 2019	Manzano-Salgado et al., 2017	-6.08287e-06	-7.59936e-05	6.38278e-05	0	-0.00153937	-0.00581458	0.00273584
PFOS_prenatal_WC_girls	Zhang, Lei, et al., 2022; Bloom et al., 2022; Hartman et al., 2017; Liu et al., 2020; Andersen et al., 2013; Mora et al., 2017; Jensen et al., 2020; Chen et al., 2019; Manzano-Salgado et al., 2017	NONE	-6.68053e-05	-0.00040626	0.000272649	0.464967	0.000318178	-0.00631753	0.00695389
PFOS_prenatal_WC_girls	Bloom et al., 2022; Hartman et al., 2017; Liu et al., 2020; Andersen et al., 2013; Mora et al., 2017; Jensen et al., 2020; Chen et al., 2019; Manzano-Salgado et al., 2017	Zhang, Lei, et al., 2022	-0.000102952	-0.000479184	0.00027328	0.525021	-0.000134272	-0.00600786	0.00573931
PFOS_prenatal_WC_girls	Zhang, Lei, et al., 2022; Hartman et al., 2017; Liu et al., 2020; Andersen et al., 2013; Mora et al., 2017; Jensen et al., 2020; Chen et al., 2019; Manzano-Salgado et al., 2017	Bloom et al., 2022	-4.76841e-05	-0.000383002	0.000287634	0.448066	0.00031738	-0.00588102	0.00651578
PFOS_prenatal_WC_girls	Zhang, Lei, et al., 2022; Bloom et al., 2022; Liu et al., 2020; Andersen et al., 2013; Mora et al., 2017; Jensen et al., 2020; Chen et al., 2019; Manzano-Salgado et al., 2017	Hartman et al., 2017	5.79016e-05	-1.07279e-06	0.000116876	0	-4.63404e-05	-0.00626895	0.00617627
PFOS_prenatal_WC_girls	Zhang, Lei, et al., 2022; Bloom et al., 2022; Hartman et al., 2017; Andersen et al., 2013; Mora et al., 2017; Jensen et al., 2020; Chen et al., 2019; Manzano-Salgado et al., 2017	Liu et al., 2020	-8.20773e-05	-0.0004276	0.000263446	0.506118	-0.000245426	-0.00614879	0.00565794
PFOS_prenatal_WC_girls	Zhang, Lei, et al., 2022; Bloom et al., 2022; Hartman et al., 2017; Liu et al., 2020; Mora et al., 2017; Jensen et al., 2020; Chen et al., 2019; Manzano-Salgado et al., 2017	Andersen et al., 2013	-6.51383e-05	-0.000404543	0.000274266	0.529794	2.8614e-05	-0.00617339	0.00623061
PFOS_prenatal_WC_girls	Zhang, Lei, et al., 2022; Bloom et al., 2022; Hartman et al., 2017; Liu et al., 2020; Andersen et al., 2013; Jensen et al., 2020; Chen et al., 2019; Manzano-Salgado et al., 2017	Mora et al., 2017	-0.000109187	-0.000750244	0.000531871	0.367488	-0.00013255	-0.00648768	0.00622258
PFOS_prenatal_WC_girls	Zhang, Lei, et al., 2022; Bloom et al., 2022; Hartman et al., 2017; Liu et al., 2020; Andersen et al., 2013; Mora et al., 2017; Chen et al., 2019; Manzano-Salgado et al., 2017	Jensen et al., 2020	-6.49868e-05	-0.000403986	0.000274012	0.511598	0.00111657	-0.00421733	0.00645048
PFOS_prenatal_WC_girls	Zhang, Lei, et al., 2022; Bloom et al., 2022; Hartman et al., 2017; Liu et al., 2020; Andersen et al., 2013; Mora et al., 2017; Jensen et al., 2020; Manzano-Salgado et al., 2017	Chen et al., 2019	-0.00014884	-0.000650869	0.000353189	0.51686	-0.000139667	-0.00619117	0.00591183
PFOS_prenatal_WC_girls	Zhang, Lei, et al., 2022; Bloom et al., 2022; Hartman et al., 2017; Liu et al., 2020; Andersen et al., 2013; Mora et al., 2017; Jensen et al., 2020; Chen et al., 2019	Manzano-Salgado et al., 2017	-6.79994e-05	-0.000407808	0.000271809	0.520286	-0.00179476	-0.00534979	0.00176026
PFHxS_prenatal_WC_both_sexes	Papadopoulou et al., 2021; Zhang, Lei, et al., 2022; Bloom et al., 2022; Liu et al., 2020; Mora et al., 2017; Jensen et al., 2020; Chen et al., 2019; Manzano-Salgado et al., 2017	NONE	8.93196e-05	-0.000133235	0.000311875	0	-0.00498712	-0.0425918	0.0326176
PFHxS_prenatal_WC_both_sexes	Zhang, Lei, et al., 2022; Bloom et al., 2022; Liu et al., 2020; Mora et al., 2017; Jensen et al., 2020; Chen et al., 2019; Manzano-Salgado et al., 2017	Papadopoulou et al., 2021	8.90887e-05	-0.000133467	0.000311644	0.0486263	-0.0102942	-0.0475219	0.0269336
PFHxS_prenatal_WC_both_sexes	Papadopoulou et al., 2021; Bloom et al., 2022; Liu et al., 2020; Mora et al., 2017; Jensen et al., 2020; Chen et al., 2019; Manzano-Salgado et al., 2017	Zhang, Lei, et al., 2022	8.81152e-05	-0.000134455	0.000310686	0.0229555	-0.00332878	-0.0403215	0.033664
PFHxS_prenatal_WC_both_sexes	Papadopoulou et al., 2021; Zhang, Lei, et al., 2022; Liu et al., 2020; Mora et al., 2017; Jensen et al., 2020; Chen et al., 2019; Manzano-Salgado et al., 2017	Bloom et al., 2022	8.99323e-05	-0.000132625	0.000312489	0	0.00210112	-0.0366279	0.0408302
PFHxS_prenatal_WC_both_sexes	Papadopoulou et al., 2021; Zhang, Lei, et al., 2022; Bloom et al., 2022; Mora et al., 2017; Jensen et al., 2020; Chen et al., 2019; Manzano-Salgado et al., 2017	Liu et al., 2020	8.84689e-05	-0.000134088	0.000311026	0	-0.00617225	-0.043013	0.0306685
PFHxS_prenatal_WC_both_sexes	Papadopoulou et al., 2021; Zhang, Lei, et al., 2022; Bloom et al., 2022; Liu et al., 2020; Jensen et al., 2020; Chen et al., 2019; Manzano-Salgado et al., 2017	Mora et al., 2017	0.000453526	-0.00123694	0.00214399	0.112995	-0.00289317	-0.0435168	0.0377305
PFHxS_prenatal_WC_both_sexes	Papadopoulou et al., 2021; Zhang, Lei, et al., 2022; Bloom et al., 2022; Liu et al., 2020; Mora et al., 2017; Chen et al., 2019; Manzano-Salgado et al., 2017	Jensen et al., 2020	0.000276015	-0.00141781	0.00196984	0.134794	-0.00421371	-0.0332063	0.0247789
PFHxS_prenatal_WC_both_sexes	Papadopoulou et al., 2021; Zhang, Lei, et al., 2022; Bloom et al., 2022; Liu et al., 2020; Mora et al., 2017; Jensen et al., 2020; Manzano-Salgado et al., 2017	Chen et al., 2019	8.43887e-05	-0.000140099	0.000308876	0.122509	-0.00276538	-0.0412275	0.0356967
PFHxS_prenatal_WC_both_sexes	Papadopoulou et al., 2021; Zhang, Lei, et al., 2022; Bloom et al., 2022; Liu et al., 2020; Mora et al., 2017; Jensen et al., 2020; Chen et al., 2019	Manzano-Salgado et al., 2017	8.95411e-05	-0.000133014	0.000312096	0	0.00847663	-0.0259175	0.0428707
PFHxS_prenatal_WC_boys	Zhang, Lei, et al., 2022; Bloom et al., 2022; Liu et al., 2020; Mora et al., 2017; Jensen et al., 2020; Chen et al., 2019; Manzano-Salgado et al., 2017	NONE	-0.000147046	-0.000531119	0.000237027	0.0376399	-0.0515655	-0.13315	0.0300195
PFHxS_prenatal_WC_boys	Bloom et al., 2022; Liu et al., 2020; Mora et al., 2017; Jensen et al., 2020; Chen et al., 2019; Manzano-Salgado et al., 2017	Zhang, Lei, et al., 2022	-0.000147805	-0.000531887	0.000236276	0.149197	-0.0456382	-0.130062	0.0387856
PFHxS_prenatal_WC_boys	Zhang, Lei, et al., 2022; Liu et al., 2020; Mora et al., 2017; Jensen et al., 2020; Chen et al., 2019; Manzano-Salgado et al., 2017	Bloom et al., 2022	-0.000146269	-0.000530347	0.000237809	0.104404	-0.0413584	-0.131788	0.0490707
PFHxS_prenatal_WC_boys	Zhang, Lei, et al., 2022; Bloom et al., 2022; Mora et al., 2017; Jensen et al., 2020; Chen et al., 2019; Manzano-Salgado et al., 2017	Liu et al., 2020	-0.000149194	-0.00053328	0.000234892	0	-0.0465284	-0.130568	0.0375116
PFHxS_prenatal_WC_boys	Zhang, Lei, et al., 2022; Bloom et al., 2022; Liu et al., 2020; Jensen et al., 2020; Chen et al., 2019; Manzano-Salgado et al., 2017	Mora et al., 2017	-0.000385368	-0.00157562	0.000804881	0.175293	-0.0489049	-0.143847	0.0460368
PFHxS_prenatal_WC_boys	Zhang, Lei, et al., 2022; Bloom et al., 2022; Liu et al., 2020; Mora et al., 2017; Chen et al., 2019; Manzano-Salgado et al., 2017	Jensen et al., 2020	-0.000116055	-0.00408843	0.00385632	0.191639	-0.0380901	-0.0817339	0.00555363
PFHxS_prenatal_WC_boys	Zhang, Lei, et al., 2022; Bloom et al., 2022; Liu et al., 2020; Mora et al., 2017; Jensen et al., 2020; Manzano-Salgado et al., 2017	Chen et al., 2019	-0.000117914	-0.000523662	0.000287833	0.172766	-0.0455552	-0.134121	0.0430102
PFHxS_prenatal_WC_boys	Zhang, Lei, et al., 2022; Bloom et al., 2022; Liu et al., 2020; Mora et al., 2017; Jensen et al., 2020; Chen et al., 2019	Manzano-Salgado et al., 2017	-0.000146242	-0.000530316	0.000237832	0	-0.0108336	-0.0974726	0.0758055
PFHxS_prenatal_WC_girls	Zhang, Lei, et al., 2022; Bloom et al., 2022; Hartman et al., 2017; Liu et al., 2020; Mora et al., 2017; Jensen et al., 2020; Chen et al., 2019; Manzano-Salgado et al., 2017	NONE	1.32523e-05	-0.000439261	0.000465766	0	0.015058	-0.029994	0.0601101
PFHxS_prenatal_WC_girls	Bloom et al., 2022; Hartman et al., 2017; Liu et al., 2020; Mora et al., 2017; Jensen et al., 2020; Chen et al., 2019; Manzano-Salgado et al., 2017	Zhang, Lei, et al., 2022	1.97558e-05	-0.000428562	0.000468073	0.0226178	0.0147976	-0.0277616	0.0573569
PFHxS_prenatal_WC_girls	Zhang, Lei, et al., 2022; Hartman et al., 2017; Liu et al., 2020; Mora et al., 2017; Jensen et al., 2020; Chen et al., 2019; Manzano-Salgado et al., 2017	Bloom et al., 2022	1.43334e-05	-0.000437346	0.000466013	0.0102205	0.0190326	-0.0251675	0.0632328
PFHxS_prenatal_WC_girls	Zhang, Lei, et al., 2022; Bloom et al., 2022; Liu et al., 2020; Mora et al., 2017; Jensen et al., 2020; Chen et al., 2019; Manzano-Salgado et al., 2017	Hartman et al., 2017	0.000159327	-8.92047e-05	0.000407858	0	0.0156701	-0.0298927	0.0612329
PFHxS_prenatal_WC_girls	Zhang, Lei, et al., 2022; Bloom et al., 2022; Hartman et al., 2017; Mora et al., 2017; Jensen et al., 2020; Chen et al., 2019; Manzano-Salgado et al., 2017	Liu et al., 2020	1.0918e-05	-0.000443437	0.000465273	0	0.0104318	-0.0319658	0.0528295
PFHxS_prenatal_WC_girls	Zhang, Lei, et al., 2022; Bloom et al., 2022; Hartman et al., 2017; Liu et al., 2020; Jensen et al., 2020; Chen et al., 2019; Manzano-Salgado et al., 2017	Mora et al., 2017	6.3195e-05	-0.00185438	0.00198077	0	0.0159605	-0.0307042	0.0626253
PFHxS_prenatal_WC_girls	Zhang, Lei, et al., 2022; Bloom et al., 2022; Hartman et al., 2017; Liu et al., 2020; Mora et al., 2017; Chen et al., 2019; Manzano-Salgado et al., 2017	Jensen et al., 2020	1.31343e-05	-0.000439475	0.000465743	0.0614024	0.0125317	-0.0212826	0.0463461
PFHxS_prenatal_WC_girls	Zhang, Lei, et al., 2022; Bloom et al., 2022; Hartman et al., 2017; Liu et al., 2020; Mora et al., 2017; Jensen et al., 2020; Manzano-Salgado et al., 2017	Chen et al., 2019	-2.54235e-05	-0.00051048	0.000459633	0	0.0147791	-0.0292823	0.0588406
PFHxS_prenatal_WC_girls	Zhang, Lei, et al., 2022; Bloom et al., 2022; Hartman et al., 2017; Liu et al., 2020; Mora et al., 2017; Jensen et al., 2020; Chen et al., 2019	Manzano-Salgado et al., 2017	1.26672e-05	-0.00044031	0.000465645	0	0.0043205	-0.030114	0.038755
PFNA_prenatal_WC_both_sexes	Papadopoulou et al., 2021; Zhang, Lei, et al., 2022; Bloom et al., 2022; Liu et al., 2020; Mora et al., 2017; Jensen et al., 2020; Chen et al., 2019; Manzano-Salgado et al., 2017	NONE	0.000424443	-0.000628135	0.00147702	0.158983	0.046747	0.00633061	0.0871633
PFNA_prenatal_WC_both_sexes	Zhang, Lei, et al., 2022; Bloom et al., 2022; Liu et al., 2020; Mora et al., 2017; Jensen et al., 2020; Chen et al., 2019; Manzano-Salgado et al., 2017	Papadopoulou et al., 2021	0.000411181	-0.000626771	0.00144913	0	0.0334856	-0.0043499	0.0713211
PFNA_prenatal_WC_both_sexes	Papadopoulou et al., 2021; Bloom et al., 2022; Liu et al., 2020; Mora et al., 2017; Jensen et al., 2020; Chen et al., 2019; Manzano-Salgado et al., 2017	Zhang, Lei, et al., 2022	0.00048621	-0.000662076	0.0016345	0.270033	0.0473422	0.00760453	0.0870798
PFNA_prenatal_WC_both_sexes	Papadopoulou et al., 2021; Zhang, Lei, et al., 2022; Liu et al., 2020; Mora et al., 2017; Jensen et al., 2020; Chen et al., 2019; Manzano-Salgado et al., 2017	Bloom et al., 2022	0.000409924	-0.000626658	0.00144651	0.0288839	0.039902	-0.000101214	0.0799051
PFNA_prenatal_WC_both_sexes	Papadopoulou et al., 2021; Zhang, Lei, et al., 2022; Bloom et al., 2022; Mora et al., 2017; Jensen et al., 2020; Chen et al., 2019; Manzano-Salgado et al., 2017	Liu et al., 2020	0.000421365	-0.000627927	0.00147066	0.257648	0.0443417	0.00635008	0.0823333
PFNA_prenatal_WC_both_sexes	Papadopoulou et al., 2021; Zhang, Lei, et al., 2022; Bloom et al., 2022; Liu et al., 2020; Jensen et al., 2020; Chen et al., 2019; Manzano-Salgado et al., 2017	Mora et al., 2017	0.000104768	-0.000582293	0.00079183	0.10758	0.0513703	0.00794607	0.0947946
PFNA_prenatal_WC_both_sexes	Papadopoulou et al., 2021; Zhang, Lei, et al., 2022; Bloom et al., 2022; Liu et al., 2020; Mora et al., 2017; Chen et al., 2019; Manzano-Salgado et al., 2017	Jensen et al., 2020	0.000417234	-0.000627481	0.00146195	0.136474	0.0371972	0.000981409	0.0734131
PFNA_prenatal_WC_both_sexes	Papadopoulou et al., 2021; Zhang, Lei, et al., 2022; Bloom et al., 2022; Liu et al., 2020; Mora et al., 2017; Jensen et al., 2020; Manzano-Salgado et al., 2017	Chen et al., 2019	0.00131373	-0.000479142	0.0031066	0.117294	0.0488113	0.00772676	0.0898959
PFNA_prenatal_WC_both_sexes	Papadopoulou et al., 2021; Zhang, Lei, et al., 2022; Bloom et al., 2022; Liu et al., 2020; Mora et al., 2017; Jensen et al., 2020; Chen et al., 2019	Manzano-Salgado et al., 2017	0.000420765	-0.000627921	0.00146945	0.260601	0.0472806	0.00943774	0.0851235
PFNA_prenatal_WC_boys	Zhang, Lei, et al., 2022; Bloom et al., 2022; Liu et al., 2020; Mora et al., 2017; Jensen et al., 2020; Chen et al., 2019; Manzano-Salgado et al., 2017	NONE	-0.000135246	-0.000618637	0.000348144	0	0.0465311	-0.0122811	0.105343
PFNA_prenatal_WC_boys	Bloom et al., 2022; Liu et al., 2020; Mora et al., 2017; Jensen et al., 2020; Chen et al., 2019; Manzano-Salgado et al., 2017	Zhang, Lei, et al., 2022	-0.000133525	-0.000617024	0.000349975	0	0.0468191	-0.0107757	0.104414
PFNA_prenatal_WC_boys	Zhang, Lei, et al., 2022; Liu et al., 2020; Mora et al., 2017; Jensen et al., 2020; Chen et al., 2019; Manzano-Salgado et al., 2017	Bloom et al., 2022	-0.000136086	-0.000619479	0.000347307	0	0.03492	-0.0206007	0.0904406
PFNA_prenatal_WC_boys	Zhang, Lei, et al., 2022; Bloom et al., 2022; Mora et al., 2017; Jensen et al., 2020; Chen et al., 2019; Manzano-Salgado et al., 2017	Liu et al., 2020	-0.000136374	-0.000619769	0.000347022	0	0.0411842	-0.0152878	0.0976562
PFNA_prenatal_WC_boys	Zhang, Lei, et al., 2022; Bloom et al., 2022; Liu et al., 2020; Jensen et al., 2020; Chen et al., 2019; Manzano-Salgado et al., 2017	Mora et al., 2017	-0.000150714	-0.000639586	0.000338157	0	0.0516681	-0.0126258	0.115962
PFNA_prenatal_WC_boys	Zhang, Lei, et al., 2022; Bloom et al., 2022; Liu et al., 2020; Mora et al., 2017; Chen et al., 2019; Manzano-Salgado et al., 2017	Jensen et al., 2020	-0.000135459	-0.000618851	0.000347933	0	0.0426602	-0.00621376	0.0915342
PFNA_prenatal_WC_boys	Zhang, Lei, et al., 2022; Bloom et al., 2022; Liu et al., 2020; Mora et al., 2017; Jensen et al., 2020; Manzano-Salgado et al., 2017	Chen et al., 2019	0.000585905	-0.00261606	0.00378787	0	0.0482985	-0.0116371	0.108234
PFNA_prenatal_WC_boys	Zhang, Lei, et al., 2022; Bloom et al., 2022; Liu et al., 2020; Mora et al., 2017; Jensen et al., 2020; Chen et al., 2019	Manzano-Salgado et al., 2017	-0.000136101	-0.000619494	0.000347291	0	0.0292781	-0.0224555	0.0810118
PFNA_prenatal_WC_girls	Zhang, Lei, et al., 2022; Bloom et al., 2022; Hartman et al., 2017; Liu et al., 2020; Mora et al., 2017; Jensen et al., 2020; Chen et al., 2019; Manzano-Salgado et al., 2017	NONE	0.00104035	-0.000205323	0.00228601	0	0.0137319	-0.0353093	0.0627731
PFNA_prenatal_WC_girls	Bloom et al., 2022; Hartman et al., 2017; Liu et al., 2020; Mora et al., 2017; Jensen et al., 2020; Chen et al., 2019; Manzano-Salgado et al., 2017	Zhang, Lei, et al., 2022	0.00116346	-0.000149287	0.00247621	0	0.0177767	-0.0339022	0.0694557
PFNA_prenatal_WC_girls	Zhang, Lei, et al., 2022; Hartman et al., 2017; Liu et al., 2020; Mora et al., 2017; Jensen et al., 2020; Chen et al., 2019; Manzano-Salgado et al., 2017	Bloom et al., 2022	0.00103637	-0.000209349	0.0022821	0	0.0117032	-0.0394653	0.0628717
PFNA_prenatal_WC_girls	Zhang, Lei, et al., 2022; Bloom et al., 2022; Liu et al., 2020; Mora et al., 2017; Jensen et al., 2020; Chen et al., 2019; Manzano-Salgado et al., 2017	Hartman et al., 2017	0.00105468	-0.000196734	0.00230609	0	0.0191069	-0.036185	0.0743988
PFNA_prenatal_WC_girls	Zhang, Lei, et al., 2022; Bloom et al., 2022; Hartman et al., 2017; Mora et al., 2017; Jensen et al., 2020; Chen et al., 2019; Manzano-Salgado et al., 2017	Liu et al., 2020	0.000878703	-0.00235134	0.00410875	0	0.0188425	-0.0267378	0.0644228
PFNA_prenatal_WC_girls	Zhang, Lei, et al., 2022; Bloom et al., 2022; Hartman et al., 2017; Liu et al., 2020; Jensen et al., 2020; Chen et al., 2019; Manzano-Salgado et al., 2017	Mora et al., 2017	0.000614727	-0.000935843	0.0021653	0	0.0191432	-0.0375095	0.0757959
PFNA_prenatal_WC_girls	Zhang, Lei, et al., 2022; Bloom et al., 2022; Hartman et al., 2017; Liu et al., 2020; Mora et al., 2017; Chen et al., 2019; Manzano-Salgado et al., 2017	Jensen et al., 2020	0.00103568	-0.000210009	0.00228137	0	-0.00151773	-0.0464321	0.0433967
PFNA_prenatal_WC_girls	Zhang, Lei, et al., 2022; Bloom et al., 2022; Hartman et al., 2017; Liu et al., 2020; Mora et al., 2017; Jensen et al., 2020; Manzano-Salgado et al., 2017	Chen et al., 2019	0.00137487	-0.000454686	0.00320442	0	0.0183056	-0.0351919	0.0718032
PFNA_prenatal_WC_girls	Zhang, Lei, et al., 2022; Bloom et al., 2022; Hartman et al., 2017; Liu et al., 2020; Mora et al., 2017; Jensen et al., 2020; Chen et al., 2019	Manzano-Salgado et al., 2017	0.00104331	-0.000202401	0.00228903	0	0.0285533	-0.0201922	0.0772988
PFDA_prenatal_WC_both_sexes	Zhang, Lei, et al., 2022; Bloom et al., 2022; Jensen et al., 2020; Chen et al., 2019	NONE	0.000290685	-0.000200562	0.000781932	0	0.0538186	-0.13526	0.242897
PFDA_prenatal_WC_both_sexes	Bloom et al., 2022; Jensen et al., 2020; Chen et al., 2019	Zhang, Lei, et al., 2022	0.000295397	-0.000196507	0.000787301	0	0.0576934	-0.142471	0.257858
PFDA_prenatal_WC_both_sexes	Zhang, Lei, et al., 2022; Jensen et al., 2020; Chen et al., 2019	Bloom et al., 2022	0.000290594	-0.000200653	0.000781842	0	0.0410712	-0.118064	0.200206
PFDA_prenatal_WC_both_sexes	Zhang, Lei, et al., 2022; Bloom et al., 2022; Chen et al., 2019	Jensen et al., 2020	0.000290523	-0.000200725	0.00078177	0	0.0264925	-0.147363	0.200348
PFDA_prenatal_WC_both_sexes	Zhang, Lei, et al., 2022; Bloom et al., 2022; Jensen et al., 2020	Chen et al., 2019	-0.00137293	-0.0108755	0.00812961	0	0.0624301	-0.155637	0.280497
PFDA_prenatal_WC_boys	Zhang, Lei, et al., 2022; Bloom et al., 2022; Jensen et al., 2020; Chen et al., 2019	NONE	-7.56228e-05	-0.000425537	0.000274292	0	0.0632471	-0.220339	0.346833
PFDA_prenatal_WC_boys	Bloom et al., 2022; Jensen et al., 2020; Chen et al., 2019	Zhang, Lei, et al., 2022	-7.46268e-05	-0.000424564	0.000275311	0	0.06839	-0.230623	0.367403
PFDA_prenatal_WC_boys	Zhang, Lei, et al., 2022; Jensen et al., 2020; Chen et al., 2019	Bloom et al., 2022	-7.56405e-05	-0.000425555	0.000274274	0	0.0523329	-0.160461	0.265127
PFDA_prenatal_WC_boys	Zhang, Lei, et al., 2022; Bloom et al., 2022; Chen et al., 2019	Jensen et al., 2020	-7.5684e-05	-0.000425599	0.00027423	0	0.0248569	-0.255617	0.305331
PFDA_prenatal_WC_boys	Zhang, Lei, et al., 2022; Bloom et al., 2022; Jensen et al., 2020	Chen et al., 2019	-0.00694469	-0.0372321	0.0233427	0	0.072639	-0.252314	0.397593
PFDA_prenatal_WC_girls	Zhang, Lei, et al., 2022; Bloom et al., 2022; Jensen et al., 2020; Chen et al., 2019	NONE	0.000985978	-0.00014779	0.00211975	0	0.0443931	-0.216786	0.305572
PFDA_prenatal_WC_girls	Bloom et al., 2022; Jensen et al., 2020; Chen et al., 2019	Zhang, Lei, et al., 2022	0.0010318	-0.000132004	0.00219561	0	0.04734	-0.230565	0.325245
PFDA_prenatal_WC_girls	Zhang, Lei, et al., 2022; Jensen et al., 2020; Chen et al., 2019	Bloom et al., 2022	0.000985699	-0.000148072	0.00211947	0	0.029033	-0.206258	0.264324
PFDA_prenatal_WC_girls	Zhang, Lei, et al., 2022; Bloom et al., 2022; Chen et al., 2019	Jensen et al., 2020	0.00098571	-0.000148061	0.00211948	0	0.0271671	-0.200551	0.254886
PFDA_prenatal_WC_girls	Zhang, Lei, et al., 2022; Bloom et al., 2022; Jensen et al., 2020	Chen et al., 2019	0.00014336	-0.00487898	0.0051657	0	0.0514244	-0.252199	0.355048
PFUA_prenatal_WC_both_sexes	Zhang, Lei, et al., 2022; Bloom et al., 2022; Chen et al., 2019	NONE	0.000489349	-0.000994597	0.00197329	0.671005	0.372889	0.0703035	0.675474
PFUA_prenatal_WC_both_sexes	Bloom et al., 2022; Chen et al., 2019	Zhang, Lei, et al., 2022	0.296949	-0.394514	0.988412	0.827941	0.402162	-0.319408	1.12373
PFUA_prenatal_WC_both_sexes	Zhang, Lei, et al., 2022; Chen et al., 2019	Bloom et al., 2022	0.000445689	-0.000249888	0.00114127	0	0.00169469	-0.00309055	0.00647993
PFUA_prenatal_WC_both_sexes	Zhang, Lei, et al., 2022; Bloom et al., 2022	Chen et al., 2019	0.298224	-0.390148	0.986595	0.826411	0.460931	-0.297734	1.2196
PFUA_prenatal_WC_boys	Zhang, Lei, et al., 2022; Bloom et al., 2022; Chen et al., 2019	NONE	0.000228518	-0.00439842	0.00485545	0.378242	0.513237	-0.113888	1.14036
PFUA_prenatal_WC_boys	Bloom et al., 2022; Chen et al., 2019	Zhang, Lei, et al., 2022	0.299529	-0.588915	1.18797	0.607932	0.552952	-0.464927	1.57083
PFUA_prenatal_WC_boys	Zhang, Lei, et al., 2022; Chen et al., 2019	Bloom et al., 2022	-2.43872e-05	-0.000547274	0.000498499	0	0.00630529	-0.00890395	0.0215145
PFUA_prenatal_WC_boys	Zhang, Lei, et al., 2022; Bloom et al., 2022	Chen et al., 2019	0.304256	-0.565625	1.17414	0.595253	0.635695	-0.449994	1.72138
PFUA_prenatal_WC_girls	Zhang, Lei, et al., 2022; Bloom et al., 2022; Chen et al., 2019	NONE	0.00149178	-0.00153697	0.00452052	0	0.280509	-0.16239	0.723408
PFUA_prenatal_WC_girls	Bloom et al., 2022; Chen et al., 2019	Zhang, Lei, et al., 2022	0.0935915	-0.303156	0.49034	0.344254	0.301897	-0.267405	0.871198
PFUA_prenatal_WC_girls	Zhang, Lei, et al., 2022; Chen et al., 2019	Bloom et al., 2022	0.00135166	-0.000196667	0.00289999	0	0.00171817	-0.00105644	0.00449278
PFUA_prenatal_WC_girls	Zhang, Lei, et al., 2022; Bloom et al., 2022	Chen et al., 2019	0.0937782	-0.301058	0.488614	0.34168	0.34667	-0.287037	0.980376
PFOA_children_BMI_both_sexes	Canova et al., 2021; Scinicariello et al., 2020; Sevelsted et al., 2022; Liu et al., 2020; Timmermann et al., 2014; Karlsen et al., 2017; Schillemans et al., 2023; Vrijheid et al., 2020	NONE	-0.0525446	-0.103911	-0.00117847	0.843286	-0.0445109	-0.0603902	-0.0286317
PFOA_children_BMI_both_sexes	Scinicariello et al., 2020; Sevelsted et al., 2022; Liu et al., 2020; Timmermann et al., 2014; Karlsen et al., 2017; Schillemans et al., 2023; Vrijheid et al., 2020	Canova et al., 2021	-0.0642357	-0.123323	-0.00514792	0.856593	-0.097189	-0.16118	-0.033198
PFOA_children_BMI_both_sexes	Canova et al., 2021; Sevelsted et al., 2022; Liu et al., 2020; Timmermann et al., 2014; Karlsen et al., 2017; Schillemans et al., 2023; Vrijheid et al., 2020	Scinicariello et al., 2020	-0.0510242	-0.107654	0.00560583	0.861199	-0.0654364	-0.0957745	-0.0350984
PFOA_children_BMI_both_sexes	Canova et al., 2021; Scinicariello et al., 2020; Liu et al., 2020; Timmermann et al., 2014; Karlsen et al., 2017; Schillemans et al., 2023; Vrijheid et al., 2020	Sevelsted et al., 2022	-0.0629275	-0.120388	-0.00546697	0.865433	-0.0735327	-0.105686	-0.041379
PFOA_children_BMI_both_sexes	Canova et al., 2021; Scinicariello et al., 2020; Sevelsted et al., 2022; Timmermann et al., 2014; Karlsen et al., 2017; Schillemans et al., 2023; Vrijheid et al., 2020	Liu et al., 2020	-0.0491379	-0.100429	0.00215295	0.85972	-0.0536728	-0.074601	-0.0327447
PFOA_children_BMI_both_sexes	Canova et al., 2021; Scinicariello et al., 2020; Sevelsted et al., 2022; Liu et al., 2020; Karlsen et al., 2017; Schillemans et al., 2023; Vrijheid et al., 2020	Timmermann et al., 2014	-0.0643393	-0.12329	-0.00538903	0.854881	-0.0724722	-0.133073	-0.011871
PFOA_children_BMI_both_sexes	Canova et al., 2021; Scinicariello et al., 2020; Sevelsted et al., 2022; Liu et al., 2020; Timmermann et al., 2014; Schillemans et al., 2023; Vrijheid et al., 2020	Karlsen et al., 2017	-0.0564027	-0.118759	0.00595368	0.850762	-0.0685516	-0.10082	-0.0362836
PFOA_children_BMI_both_sexes	Canova et al., 2021; Scinicariello et al., 2020; Sevelsted et al., 2022; Liu et al., 2020; Timmermann et al., 2014; Karlsen et al., 2017; Vrijheid et al., 2020	Schillemans et al., 2023	-0.0488638	-0.1084	0.0106727	0.835871	-0.0634173	-0.097679	-0.0291555
PFOA_children_BMI_both_sexes	Canova et al., 2021; Scinicariello et al., 2020; Sevelsted et al., 2022; Liu et al., 2020; Timmermann et al., 2014; Karlsen et al., 2017; Schillemans et al., 2023	Vrijheid et al., 2020	-0.0222168	-0.0507877	0.00635407	0.683483	-0.0464528	-0.0792417	-0.0136638
PFOA_children_BMI_boys	Canova et al., 2021; Liu et al., 2020; Schillemans et al., 2023	NONE	-0.0909881	-0.248773	0.0667965	0.887976	-0.0410289	-0.228456	0.146398
PFOA_children_BMI_boys	Liu et al., 2020; Schillemans et al., 2023	Canova et al., 2021	-0.177974	-0.260574	-0.0953743	0	-0.187668	-0.344037	-0.0312999
PFOA_children_BMI_boys	Canova et al., 2021; Schillemans et al., 2023	Liu et al., 2020	-0.0834698	-0.256786	0.0898467	0.942348	-0.0604454	-0.239544	0.118653
PFOA_children_BMI_boys	Canova et al., 2021; Liu et al., 2020	Schillemans et al., 2023	-2.62778e-07	-0.000664729	0.000664204	0	-0.0302904	-0.113591	0.0530102
PFOA_children_BMI_girls	Canova et al., 2021; Liu et al., 2020; Schillemans et al., 2023; Pinney et al., 2019	NONE	-0.0150047	-0.0400518	0.0100424	0.738655	-0.0134299	-0.045556	0.0186962
PFOA_children_BMI_girls	Liu et al., 2020; Schillemans et al., 2023; Pinney et al., 2019	Canova et al., 2021	-0.0309027	-0.0487051	-0.0131002	0	-0.0633025	-0.1602	0.0335953
PFOA_children_BMI_girls	Canova et al., 2021; Schillemans et al., 2023; Pinney et al., 2019	Liu et al., 2020	-0.0144916	-0.0394896	0.0105063	0.808866	-0.0108398	-0.0422679	0.0205882
PFOA_children_BMI_girls	Canova et al., 2021; Liu et al., 2020; Pinney et al., 2019	Schillemans et al., 2023	-0.0159574	-0.0454755	0.0135607	0.825041	-0.0433353	-0.113816	0.0271457
PFOA_children_BMI_girls	Canova et al., 2021; Liu et al., 2020; Schillemans et al., 2023	Pinney et al., 2019	-0.00160432	-0.00263403	-0.000574622	0	-0.035817	-0.1018	0.0301662
PFOS_children_BMI_both_sexes	Canova et al., 2021; Scinicariello et al., 2020; Sevelsted et al., 2022; Liu et al., 2020; Timmermann et al., 2014; Karlsen et al., 2017; Schillemans et al., 2023; Vrijheid et al., 2020	NONE	-0.0165864	-0.0282618	-0.00491106	0.816825	-0.0225771	-0.0412314	-0.00392279
PFOS_children_BMI_both_sexes	Scinicariello et al., 2020; Sevelsted et al., 2022; Liu et al., 2020; Timmermann et al., 2014; Karlsen et al., 2017; Schillemans et al., 2023; Vrijheid et al., 2020	Canova et al., 2021	-0.0150643	-0.0286329	-0.00149563	0.694077	-0.0220301	-0.0392193	-0.004841
PFOS_children_BMI_both_sexes	Canova et al., 2021; Sevelsted et al., 2022; Liu et al., 2020; Timmermann et al., 2014; Karlsen et al., 2017; Schillemans et al., 2023; Vrijheid et al., 2020	Scinicariello et al., 2020	-0.0165125	-0.0287223	-0.00430267	0.840176	-0.0228726	-0.039243	-0.00650212
PFOS_children_BMI_both_sexes	Canova et al., 2021; Scinicariello et al., 2020; Liu et al., 2020; Timmermann et al., 2014; Karlsen et al., 2017; Schillemans et al., 2023; Vrijheid et al., 2020	Sevelsted et al., 2022	-0.0165385	-0.0288482	-0.00422888	0.83981	-0.022886	-0.0393913	-0.00638062
PFOS_children_BMI_both_sexes	Canova et al., 2021; Scinicariello et al., 2020; Sevelsted et al., 2022; Timmermann et al., 2014; Karlsen et al., 2017; Schillemans et al., 2023; Vrijheid et al., 2020	Liu et al., 2020	-0.016178	-0.0278744	-0.00448172	0.838945	-0.0205483	-0.0355504	-0.0055463
PFOS_children_BMI_both_sexes	Canova et al., 2021; Scinicariello et al., 2020; Sevelsted et al., 2022; Liu et al., 2020; Karlsen et al., 2017; Schillemans et al., 2023; Vrijheid et al., 2020	Timmermann et al., 2014	-0.0210496	-0.0308985	-0.0112006	0.105157	-0.0245809	-0.0360776	-0.0130841
PFOS_children_BMI_both_sexes	Canova et al., 2021; Scinicariello et al., 2020; Sevelsted et al., 2022; Liu et al., 2020; Timmermann et al., 2014; Schillemans et al., 2023; Vrijheid et al., 2020	Karlsen et al., 2017	-0.0168977	-0.0305464	-0.0032491	0.828622	-0.0230452	-0.0400337	-0.00605669
PFOS_children_BMI_both_sexes	Canova et al., 2021; Scinicariello et al., 2020; Sevelsted et al., 2022; Liu et al., 2020; Timmermann et al., 2014; Karlsen et al., 2017; Vrijheid et al., 2020	Schillemans et al., 2023	-0.018809	-0.0328114	-0.00480665	0.83564	-0.0254295	-0.044787	-0.00607193
PFOS_children_BMI_both_sexes	Canova et al., 2021; Scinicariello et al., 2020; Sevelsted et al., 2022; Liu et al., 2020; Timmermann et al., 2014; Karlsen et al., 2017; Schillemans et al., 2023	Vrijheid et al., 2020	-0.0125116	-0.0233841	-0.00163907	0.768429	-0.019816	-0.0355086	-0.0041234
PFOS_children_BMI_boys	Canova et al., 2021; Liu et al., 2020; Schillemans et al., 2023	NONE	-0.0228888	-0.0338269	-0.0119508	0	-0.0235025	-0.0354109	-0.0115941
PFOS_children_BMI_boys	Liu et al., 2020; Schillemans et al., 2023	Canova et al., 2021	-0.0295748	-0.0496528	-0.0094969	0	-0.0459242	-0.105597	0.0137486
PFOS_children_BMI_boys	Canova et al., 2021; Schillemans et al., 2023	Liu et al., 2020	-0.0227348	-0.0336836	-0.011786	0	-0.0231485	-0.0341524	-0.0121446
PFOS_children_BMI_boys	Canova et al., 2021; Liu et al., 2020	Schillemans et al., 2023	-0.0202929	-0.0333184	-0.00726753	0	-0.031119	-0.0665973	0.00435928
PFOS_children_BMI_girls	Canova et al., 2021; Liu et al., 2020; Schillemans et al., 2023	NONE	-0.0162141	-0.0530834	0.0206551	0.840141	-0.027784	-0.0719359	0.0163678
PFOS_children_BMI_girls	Liu et al., 2020; Schillemans et al., 2023	Canova et al., 2021	0.00428987	-0.0123596	0.0209393	0	0.00176118	-0.0317369	0.0352593
PFOS_children_BMI_girls	Canova et al., 2021; Schillemans et al., 2023	Liu et al., 2020	-0.0169043	-0.0588018	0.0249932	0.919927	-0.0230496	-0.0666448	0.0205456
PFOS_children_BMI_girls	Canova et al., 2021; Liu et al., 2020	Schillemans et al., 2023	-0.0377669	-0.0543762	-0.0211577	0	-0.033666	-0.0575639	-0.00976804
PFHxS_children_BMI_both_sexes	Canova et al., 2021; Scinicariello et al., 2020; Liu et al., 2020; Karlsen et al., 2017; Schillemans et al., 2023; Vrijheid et al., 2020	NONE	-0.024711	-0.0813858	0.0319639	0.34665	-0.0334143	-0.115692	0.0488632
PFHxS_children_BMI_both_sexes	Scinicariello et al., 2020; Liu et al., 2020; Karlsen et al., 2017; Schillemans et al., 2023; Vrijheid et al., 2020	Canova et al., 2021	-0.0644312	-0.134328	0.00546611	0	-0.0814553	-0.229365	0.0664544
PFHxS_children_BMI_both_sexes	Canova et al., 2021; Liu et al., 2020; Karlsen et al., 2017; Schillemans et al., 2023; Vrijheid et al., 2020	Scinicariello et al., 2020	-0.0172371	-0.0849474	0.0504732	0.320808	-0.0458076	-0.160027	0.0684118
PFHxS_children_BMI_both_sexes	Canova et al., 2021; Scinicariello et al., 2020; Karlsen et al., 2017; Schillemans et al., 2023; Vrijheid et al., 2020	Liu et al., 2020	-0.0285201	-0.0875165	0.0304764	0.434189	-0.0663233	-0.166812	0.0341654
PFHxS_children_BMI_both_sexes	Canova et al., 2021; Scinicariello et al., 2020; Liu et al., 2020; Schillemans et al., 2023; Vrijheid et al., 2020	Karlsen et al., 2017	-0.00454972	-0.0491752	0.0400757	0.185997	-0.0435703	-0.148167	0.0610268
PFHxS_children_BMI_both_sexes	Canova et al., 2021; Scinicariello et al., 2020; Liu et al., 2020; Karlsen et al., 2017; Vrijheid et al., 2020	Schillemans et al., 2023	-0.0337566	-0.0995427	0.0320294	0.471072	-0.067481	-0.18322	0.0482581
PFHxS_children_BMI_both_sexes	Canova et al., 2021; Scinicariello et al., 2020; Liu et al., 2020; Karlsen et al., 2017; Schillemans et al., 2023	Vrijheid et al., 2020	-0.0175312	-0.0705674	0.035505	0.233051	0.0113043	-0.0620596	0.0846681
PFHxS_children_BMI_boys	Canova et al., 2021; Liu et al., 2020; Schillemans et al., 2023	NONE	-0.054713	-0.25579	0.146364	0.177921	-0.0331445	-0.161968	0.0956791
PFHxS_children_BMI_boys	Liu et al., 2020; Schillemans et al., 2023	Canova et al., 2021	-0.221375	-0.517607	0.0748577	0	-0.195041	-0.59951	0.209428
PFHxS_children_BMI_boys	Canova et al., 2021; Schillemans et al., 2023	Liu et al., 2020	-0.0576436	-0.272232	0.156945	0.584686	-0.0649487	-0.280019	0.150122
PFHxS_children_BMI_boys	Canova et al., 2021; Liu et al., 2020	Schillemans et al., 2023	0.0128076	0.00212921	0.0234859	0	-0.00202207	-0.185506	0.181462
PFHxS_children_BMI_girls	Canova et al., 2021; Liu et al., 2020; Schillemans et al., 2023	NONE	0.0666572	-0.113577	0.246892	0.348101	0.0398788	-0.124895	0.204652
PFHxS_children_BMI_girls	Liu et al., 2020; Schillemans et al., 2023	Canova et al., 2021	0.216758	-0.044222	0.477738	0	0.232428	-0.0368148	0.501671
PFHxS_children_BMI_girls	Canova et al., 2021; Schillemans et al., 2023	Liu et al., 2020	0.037616	-0.126817	0.202049	0.462154	0.0584089	-0.111004	0.227822
PFHxS_children_BMI_girls	Canova et al., 2021; Liu et al., 2020	Schillemans et al., 2023	0.023869	-0.180504	0.228242	0.175928	0.0453849	-0.163311	0.254081
PFNA_children_BMI_both_sexes	Scinicariello et al., 2020; Liu et al., 2020; Karlsen et al., 2017; Schillemans et al., 2023; Vrijheid et al., 2020	NONE	-0.216236	-0.488311	0.0558396	0.805426	-0.327923	-0.612061	-0.0437845
PFNA_children_BMI_both_sexes	Liu et al., 2020; Karlsen et al., 2017; Schillemans et al., 2023; Vrijheid et al., 2020	Scinicariello et al., 2020	-0.302007	-0.621074	0.0170602	0.845756	-0.305697	-0.758938	0.147545
PFNA_children_BMI_both_sexes	Scinicariello et al., 2020; Karlsen et al., 2017; Schillemans et al., 2023; Vrijheid et al., 2020	Liu et al., 2020	-0.224198	-0.501553	0.0531564	0.853297	-0.308386	-0.560695	-0.0560763
PFNA_children_BMI_both_sexes	Scinicariello et al., 2020; Liu et al., 2020; Schillemans et al., 2023; Vrijheid et al., 2020	Karlsen et al., 2017	-0.285316	-0.641171	0.0705387	0.816358	-0.276812	-0.732415	0.178791
PFNA_children_BMI_both_sexes	Scinicariello et al., 2020; Liu et al., 2020; Karlsen et al., 2017; Vrijheid et al., 2020	Schillemans et al., 2023	-0.172443	-0.509935	0.16505	0.82176	-0.179093	-0.582929	0.224743
PFNA_children_BMI_both_sexes	Scinicariello et al., 2020; Liu et al., 2020; Karlsen et al., 2017; Schillemans et al., 2023	Vrijheid et al., 2020	-0.0502405	-0.0925465	-0.00793439	0.378393	-0.123733	-0.482666	0.235199
PFOA_children_risk_both_sexes	Karlsen et al., 2017; Geiger et al., 2021; Domazet et al., 2016; Vrijheid et al., 2020	NONE	-0.0100997	-0.049653	0.0294535	0.836445	-0.0073501	-0.0553715	0.0406713
PFOA_children_risk_both_sexes	Geiger et al., 2021; Domazet et al., 2016; Vrijheid et al., 2020	Karlsen et al., 2017	-0.00805758	-0.0649724	0.0488572	0.877411	-0.0101265	-0.0664736	0.0462206
PFOA_children_risk_both_sexes	Karlsen et al., 2017; Domazet et al., 2016; Vrijheid et al., 2020	Geiger et al., 2021	-0.0209526	-0.0685668	0.0266616	0.875924	-0.0365369	-0.0858913	0.0128174
PFOA_children_risk_both_sexes	Karlsen et al., 2017; Geiger et al., 2021; Vrijheid et al., 2020	Domazet et al., 2016	-0.0203534	-0.0714487	0.0307418	0.830404	-0.0154484	-0.0661842	0.0352873
PFOA_children_risk_both_sexes	Karlsen et al., 2017; Geiger et al., 2021; Domazet et al., 2016	Vrijheid et al., 2020	0.00694998	-0.0178522	0.0317521	0.618025	0.01345	-0.0181404	0.0450403
PFOS_children_risk_both_sexes	Karlsen et al., 2017; Geiger et al., 2021; Domazet et al., 2016	NONE	0.00160161	-0.0081404	0.0113436	0.778853	-0.000710517	-0.0137473	0.0123262
PFOS_children_risk_both_sexes	Geiger et al., 2021; Domazet et al., 2016	Karlsen et al., 2017	0.00476341	-0.00456952	0.0140963	0.801348	0.0018055	-0.00918165	0.0127927
PFOS_children_risk_both_sexes	Karlsen et al., 2017; Domazet et al., 2016	Geiger et al., 2021	0.00140805	-0.0162997	0.0191158	0.81243	-0.000930383	-0.019222	0.0173612
PFOS_children_risk_both_sexes	Karlsen et al., 2017; Geiger et al., 2021	Domazet et al., 2016	-0.00226467	-0.00920904	0.0046797	0.0684819	-0.00283723	-0.00987192	0.00419746
