# Supplementary material for: Prenatal and childhood exposure to per-/polyfluoroalkyl substances (PFASs) and its associations with childhood overweight and/or obesity: a systematic review with meta-analyses
Source: Environ Health. 2023 Aug 14;22:56. doi: 10.1186/s12940-023-01006-6 (PMC10424367; doi:10.1186/s12940-023-01006-6)
Supplement: Supplementary file 9 — Additional file 9: Supplementary Table S07. Results of the meta-analyses stratified by age (1-3 years or 4-18 years). Meta-analyses performed with the generic invariance method (“inv_var”) and weighting by sample size (“wgtd”) are reported. The I2 as a measure of heterogeneity is also reported. Both the original meta-analyses are reported together with the sensitivity meta-analyses repeated by excluding one sample per time [file 12940_2023_1006_MOESM9_ESM.xlsx]

## Sheet: Table_all_summary_estimates_age
META	studies	study_removed	estim_inv_var	CI95_lower_inv_var	CI95_upper_inv_var	I2	estim_subj_wgtd	CI95_lower_subj_wgtd	CI95_upper_subj_wgtd
PFOA_prenatal_BMI_both_sexes_0_3y	Zhang, Pan, et al., 2022; Jensen et al., 2020; Andersen et al., 2010; Yeung et al., 2019	NONE	-0.0140101	-0.0350608	0.00704053	0.765361	-0.013268	-0.0342874	0.0077514
PFOA_prenatal_BMI_both_sexes_0_3y	Jensen et al., 2020; Andersen et al., 2010; Yeung et al., 2019	Zhang, Pan, et al., 2022	-0.014088	-0.050515	0.022339	0.682795	-0.0127669	-0.0420916	0.0165577
PFOA_prenatal_BMI_both_sexes_0_3y	Zhang, Pan, et al., 2022; Andersen et al., 2010; Yeung et al., 2019	Jensen et al., 2020	-0.0198065	-0.0381857	-0.00142725	0.785149	-0.0203727	-0.0403371	-0.000408221
PFOA_prenatal_BMI_both_sexes_0_3y	Zhang, Pan, et al., 2022; Jensen et al., 2020; Yeung et al., 2019	Andersen et al., 2010	-0.0072165	-0.0413619	0.0269289	0.827973	-0.00645726	-0.0337298	0.0208153
PFOA_prenatal_BMI_both_sexes_0_3y	Zhang, Pan, et al., 2022; Jensen et al., 2020; Andersen et al., 2010	Yeung et al., 2019	-0.00629592	-0.0289021	0.0163102	0.589374	-0.00103993	-0.0242263	0.0221464
PFOA_prenatal_BMI_both_sexes_4_18y	Zhang, Lei, et al., 2022; Bloom et al., 2022; Lauritzen et al., 2018; Gyllenhammar et al., 2018; Sevelsted et al., 2022; Liu et al., 2020; Mora et al., 2017; Chen et al., 2019; Chen et al., 2017; Karlsen et al., 2017; Manzano-Salgado et al., 2017; Hoyer et al., 2015 - Greenland; Hoyer et al., 2015 - Ukraine; Vrijheid et al., 2020	NONE	4.29458e-05	-0.000803085	0.000888977	0.240797	0.0275409	0.00593948	0.0491422
PFOA_prenatal_BMI_both_sexes_4_18y	Bloom et al., 2022; Lauritzen et al., 2018; Gyllenhammar et al., 2018; Sevelsted et al., 2022; Liu et al., 2020; Mora et al., 2017; Chen et al., 2019; Chen et al., 2017; Karlsen et al., 2017; Manzano-Salgado et al., 2017; Hoyer et al., 2015 - Greenland; Hoyer et al., 2015 - Ukraine; Vrijheid et al., 2020	Zhang, Lei, et al., 2022	0.000123363	-0.000231852	0.000478577	0.279577	0.0332376	0.00865061	0.0578246
PFOA_prenatal_BMI_both_sexes_4_18y	Zhang, Lei, et al., 2022; Lauritzen et al., 2018; Gyllenhammar et al., 2018; Sevelsted et al., 2022; Liu et al., 2020; Mora et al., 2017; Chen et al., 2019; Chen et al., 2017; Karlsen et al., 2017; Manzano-Salgado et al., 2017; Hoyer et al., 2015 - Greenland; Hoyer et al., 2015 - Ukraine; Vrijheid et al., 2020	Bloom et al., 2022	0.000137404	-0.0012888	0.00156361	0.261183	0.0354138	0.0104517	0.0603759
PFOA_prenatal_BMI_both_sexes_4_18y	Zhang, Lei, et al., 2022; Bloom et al., 2022; Gyllenhammar et al., 2018; Sevelsted et al., 2022; Liu et al., 2020; Mora et al., 2017; Chen et al., 2019; Chen et al., 2017; Karlsen et al., 2017; Manzano-Salgado et al., 2017; Hoyer et al., 2015 - Greenland; Hoyer et al., 2015 - Ukraine; Vrijheid et al., 2020	Lauritzen et al., 2018	3.58126e-05	-0.000420179	0.000491804	0.161105	0.0280082	0.00441953	0.0515968
PFOA_prenatal_BMI_both_sexes_4_18y	Zhang, Lei, et al., 2022; Bloom et al., 2022; Lauritzen et al., 2018; Sevelsted et al., 2022; Liu et al., 2020; Mora et al., 2017; Chen et al., 2019; Chen et al., 2017; Karlsen et al., 2017; Manzano-Salgado et al., 2017; Hoyer et al., 2015 - Greenland; Hoyer et al., 2015 - Ukraine; Vrijheid et al., 2020	Gyllenhammar et al., 2018	7.67479e-05	-0.00131126	0.00146475	0.188389	0.0280207	0.00491462	0.0511267
PFOA_prenatal_BMI_both_sexes_4_18y	Zhang, Lei, et al., 2022; Bloom et al., 2022; Lauritzen et al., 2018; Gyllenhammar et al., 2018; Liu et al., 2020; Mora et al., 2017; Chen et al., 2019; Chen et al., 2017; Karlsen et al., 2017; Manzano-Salgado et al., 2017; Hoyer et al., 2015 - Greenland; Hoyer et al., 2015 - Ukraine; Vrijheid et al., 2020	Sevelsted et al., 2022	5.49008e-05	-0.000241944	0.000351746	0.0966649	0.0199744	-0.000328867	0.0402776
PFOA_prenatal_BMI_both_sexes_4_18y	Zhang, Lei, et al., 2022; Bloom et al., 2022; Lauritzen et al., 2018; Gyllenhammar et al., 2018; Sevelsted et al., 2022; Mora et al., 2017; Chen et al., 2019; Chen et al., 2017; Karlsen et al., 2017; Manzano-Salgado et al., 2017; Hoyer et al., 2015 - Greenland; Hoyer et al., 2015 - Ukraine; Vrijheid et al., 2020	Liu et al., 2020	4.28304e-05	-0.000736274	0.000821935	0.289491	0.0338335	0.00984578	0.0578212
PFOA_prenatal_BMI_both_sexes_4_18y	Zhang, Lei, et al., 2022; Bloom et al., 2022; Lauritzen et al., 2018; Gyllenhammar et al., 2018; Sevelsted et al., 2022; Liu et al., 2020; Chen et al., 2019; Chen et al., 2017; Karlsen et al., 2017; Manzano-Salgado et al., 2017; Hoyer et al., 2015 - Greenland; Hoyer et al., 2015 - Ukraine; Vrijheid et al., 2020	Mora et al., 2017	7.47851e-05	-0.00231705	0.00246662	0.232473	0.0335999	0.00833553	0.0588644
PFOA_prenatal_BMI_both_sexes_4_18y	Zhang, Lei, et al., 2022; Bloom et al., 2022; Lauritzen et al., 2018; Gyllenhammar et al., 2018; Sevelsted et al., 2022; Liu et al., 2020; Mora et al., 2017; Chen et al., 2017; Karlsen et al., 2017; Manzano-Salgado et al., 2017; Hoyer et al., 2015 - Greenland; Hoyer et al., 2015 - Ukraine; Vrijheid et al., 2020	Chen et al., 2019	-9.01561e-05	-0.000630019	0.000449707	0.282426	0.0338714	0.00881194	0.0589309
PFOA_prenatal_BMI_both_sexes_4_18y	Zhang, Lei, et al., 2022; Bloom et al., 2022; Lauritzen et al., 2018; Gyllenhammar et al., 2018; Sevelsted et al., 2022; Liu et al., 2020; Mora et al., 2017; Chen et al., 2019; Karlsen et al., 2017; Manzano-Salgado et al., 2017; Hoyer et al., 2015 - Greenland; Hoyer et al., 2015 - Ukraine; Vrijheid et al., 2020	Chen et al., 2017	7.35806e-05	-0.00120311	0.00135028	0.296648	0.0330583	0.00946428	0.0566523
PFOA_prenatal_BMI_both_sexes_4_18y	Zhang, Lei, et al., 2022; Bloom et al., 2022; Lauritzen et al., 2018; Gyllenhammar et al., 2018; Sevelsted et al., 2022; Liu et al., 2020; Mora et al., 2017; Chen et al., 2019; Chen et al., 2017; Manzano-Salgado et al., 2017; Hoyer et al., 2015 - Greenland; Hoyer et al., 2015 - Ukraine; Vrijheid et al., 2020	Karlsen et al., 2017	2.74978e-05	-0.000533778	0.000588773	0.126018	0.0313476	0.00700052	0.0556947
PFOA_prenatal_BMI_both_sexes_4_18y	Zhang, Lei, et al., 2022; Bloom et al., 2022; Lauritzen et al., 2018; Gyllenhammar et al., 2018; Sevelsted et al., 2022; Liu et al., 2020; Mora et al., 2017; Chen et al., 2019; Chen et al., 2017; Karlsen et al., 2017; Hoyer et al., 2015 - Greenland; Hoyer et al., 2015 - Ukraine; Vrijheid et al., 2020	Manzano-Salgado et al., 2017	6.75059e-05	-0.00121391	0.00134892	0.286218	0.0336116	0.00873304	0.0584901
PFOA_prenatal_BMI_both_sexes_4_18y	Zhang, Lei, et al., 2022; Bloom et al., 2022; Lauritzen et al., 2018; Gyllenhammar et al., 2018; Sevelsted et al., 2022; Liu et al., 2020; Mora et al., 2017; Chen et al., 2019; Chen et al., 2017; Karlsen et al., 2017; Manzano-Salgado et al., 2017; Hoyer et al., 2015 - Ukraine; Vrijheid et al., 2020	Hoyer et al., 2015 - Greenland	3.36215e-05	-0.000546395	0.000613638	0.268739	0.03039	0.00723223	0.0535477
PFOA_prenatal_BMI_both_sexes_4_18y	Zhang, Lei, et al., 2022; Bloom et al., 2022; Lauritzen et al., 2018; Gyllenhammar et al., 2018; Sevelsted et al., 2022; Liu et al., 2020; Mora et al., 2017; Chen et al., 2019; Chen et al., 2017; Karlsen et al., 2017; Manzano-Salgado et al., 2017; Hoyer et al., 2015 - Greenland; Vrijheid et al., 2020	Hoyer et al., 2015 - Ukraine	7.01542e-05	-0.00115876	0.00129907	0.297779	0.0330698	0.0109233	0.0552164
PFOA_prenatal_BMI_both_sexes_4_18y	Zhang, Lei, et al., 2022; Bloom et al., 2022; Lauritzen et al., 2018; Gyllenhammar et al., 2018; Sevelsted et al., 2022; Liu et al., 2020; Mora et al., 2017; Chen et al., 2019; Chen et al., 2017; Karlsen et al., 2017; Manzano-Salgado et al., 2017; Hoyer et al., 2015 - Greenland; Hoyer et al., 2015 - Ukraine	Vrijheid et al., 2020	0.000165269	-0.00151768	0.00184822	0.275323	0.0370393	0.0112803	0.0627984
PFOA_prenatal_BMI_boys_0_3y	Romano et al., 2022; Zhang, Pan, et al., 2022; Jensen et al., 2020; Yeung et al., 2019	NONE	-0.00221299	-0.00697885	0.00255287	0.193218	-0.00512378	-0.0181729	0.00792539
PFOA_prenatal_BMI_boys_0_3y	Zhang, Pan, et al., 2022; Jensen et al., 2020; Yeung et al., 2019	Romano et al., 2022	-0.00679044	-0.0152008	0.00161995	0	-0.00225499	-0.020716	0.016206
PFOA_prenatal_BMI_boys_0_3y	Romano et al., 2022; Jensen et al., 2020; Yeung et al., 2019	Zhang, Pan, et al., 2022	-0.00266127	-0.0129534	0.00763089	0.206069	6.38897e-05	-0.0248986	0.0250263
PFOA_prenatal_BMI_boys_0_3y	Romano et al., 2022; Zhang, Pan, et al., 2022; Yeung et al., 2019	Jensen et al., 2020	-0.00259915	-0.00784219	0.00264389	0.349134	-0.00911626	-0.0195889	0.00135636
PFOA_prenatal_BMI_boys_0_3y	Romano et al., 2022; Zhang, Pan, et al., 2022; Jensen et al., 2020	Yeung et al., 2019	-0.000918147	-0.00322044	0.00138414	0	0.00481595	-0.0156562	0.0252881
PFOA_prenatal_BMI_boys_4_18y	Zhang, Lei, et al., 2022; Bloom et al., 2022; Liu et al., 2020; Andersen et al., 2013; Mora et al., 2017; Chen et al., 2019; Chen et al., 2017; Manzano-Salgado et al., 2017	NONE	-4.84254e-05	-0.000855426	0.000758575	0	-0.0114771	-0.0397742	0.0168201
PFOA_prenatal_BMI_boys_4_18y	Bloom et al., 2022; Liu et al., 2020; Andersen et al., 2013; Mora et al., 2017; Chen et al., 2019; Chen et al., 2017; Manzano-Salgado et al., 2017	Zhang, Lei, et al., 2022	-0.00622614	-0.0187699	0.00631767	0	-0.0141844	-0.0437281	0.0153594
PFOA_prenatal_BMI_boys_4_18y	Zhang, Lei, et al., 2022; Liu et al., 2020; Andersen et al., 2013; Mora et al., 2017; Chen et al., 2019; Chen et al., 2017; Manzano-Salgado et al., 2017	Bloom et al., 2022	-3.82651e-05	-0.000840911	0.000764381	0	-0.012995	-0.0442097	0.0182196
PFOA_prenatal_BMI_boys_4_18y	Zhang, Lei, et al., 2022; Bloom et al., 2022; Andersen et al., 2013; Mora et al., 2017; Chen et al., 2019; Chen et al., 2017; Manzano-Salgado et al., 2017	Liu et al., 2020	-4.3035e-05	-0.000847554	0.000761484	0	-0.0109792	-0.039779	0.0178205
PFOA_prenatal_BMI_boys_4_18y	Zhang, Lei, et al., 2022; Bloom et al., 2022; Liu et al., 2020; Mora et al., 2017; Chen et al., 2019; Chen et al., 2017; Manzano-Salgado et al., 2017	Andersen et al., 2013	-3.55496e-05	-0.000836583	0.000765484	0	-0.010119	-0.041324	0.021086
PFOA_prenatal_BMI_boys_4_18y	Zhang, Lei, et al., 2022; Bloom et al., 2022; Liu et al., 2020; Andersen et al., 2013; Chen et al., 2019; Chen et al., 2017; Manzano-Salgado et al., 2017	Mora et al., 2017	-4.14708e-05	-0.000845635	0.000762693	0	-0.0135529	-0.04532	0.0182142
PFOA_prenatal_BMI_boys_4_18y	Zhang, Lei, et al., 2022; Bloom et al., 2022; Liu et al., 2020; Andersen et al., 2013; Mora et al., 2017; Chen et al., 2017; Manzano-Salgado et al., 2017	Chen et al., 2019	-0.00579034	-0.0171186	0.00553787	0	-0.0147509	-0.045301	0.0157993
PFOA_prenatal_BMI_boys_4_18y	Zhang, Lei, et al., 2022; Bloom et al., 2022; Liu et al., 2020; Andersen et al., 2013; Mora et al., 2017; Chen et al., 2019; Manzano-Salgado et al., 2017	Chen et al., 2017	-4.75859e-05	-0.000854208	0.000759036	0	-0.0104821	-0.0318478	0.0108835
PFOA_prenatal_BMI_boys_4_18y	Zhang, Lei, et al., 2022; Bloom et al., 2022; Liu et al., 2020; Andersen et al., 2013; Mora et al., 2017; Chen et al., 2019; Chen et al., 2017	Manzano-Salgado et al., 2017	-4.94492e-05	-0.00085701	0.000758111	0	-0.018154	-0.0453151	0.00900719
PFOA_prenatal_BMI_girls_0_3y	Romano et al., 2022; Zhang, Pan, et al., 2022; Jensen et al., 2020; Yeung et al., 2019	NONE	-0.0035886	-0.0412593	0.0340821	0.870517	-0.00869129	-0.0313138	0.0139312
PFOA_prenatal_BMI_girls_0_3y	Zhang, Pan, et al., 2022; Jensen et al., 2020; Yeung et al., 2019	Romano et al., 2022	-0.0034841	-0.0627651	0.0557969	0.91328	-0.00458197	-0.057326	0.048162
PFOA_prenatal_BMI_girls_0_3y	Romano et al., 2022; Jensen et al., 2020; Yeung et al., 2019	Zhang, Pan, et al., 2022	-0.00518619	-0.0633356	0.0529632	0.906435	-0.00933982	-0.0625293	0.0438497
PFOA_prenatal_BMI_girls_0_3y	Romano et al., 2022; Zhang, Pan, et al., 2022; Yeung et al., 2019	Jensen et al., 2020	-0.0127292	-0.0502055	0.0247472	0.905697	-0.0166927	-0.0379819	0.00459654
PFOA_prenatal_BMI_girls_0_3y	Romano et al., 2022; Zhang, Pan, et al., 2022; Jensen et al., 2020	Yeung et al., 2019	0.00544291	-9.08019e-05	0.0109766	0.126167	0.0199225	-0.0010241	0.0408691
PFOA_prenatal_BMI_girls_4_18y	Zhang, Lei, et al., 2022; Bloom et al., 2022; Hartman et al., 2017; Liu et al., 2020; Andersen et al., 2013; Mora et al., 2017; Chen et al., 2019; Chen et al., 2017; Manzano-Salgado et al., 2017	NONE	4.6894e-05	-0.000115089	0.000208878	0.232135	0.0114617	-0.00839965	0.031323
PFOA_prenatal_BMI_girls_4_18y	Bloom et al., 2022; Hartman et al., 2017; Liu et al., 2020; Andersen et al., 2013; Mora et al., 2017; Chen et al., 2019; Chen et al., 2017; Manzano-Salgado et al., 2017	Zhang, Lei, et al., 2022	-0.00106623	-0.00737558	0.00524311	0.302717	0.0119368	-0.00768048	0.0315541
PFOA_prenatal_BMI_girls_4_18y	Zhang, Lei, et al., 2022; Hartman et al., 2017; Liu et al., 2020; Andersen et al., 2013; Mora et al., 2017; Chen et al., 2019; Chen et al., 2017; Manzano-Salgado et al., 2017	Bloom et al., 2022	4.71662e-05	-0.00011482	0.000209152	0.307012	0.0137723	-0.00643291	0.0339775
PFOA_prenatal_BMI_girls_4_18y	Zhang, Lei, et al., 2022; Bloom et al., 2022; Liu et al., 2020; Andersen et al., 2013; Mora et al., 2017; Chen et al., 2019; Chen et al., 2017; Manzano-Salgado et al., 2017	Hartman et al., 2017	5.03266e-05	-0.000111693	0.000212346	0	0.0137045	-0.00679441	0.0342035
PFOA_prenatal_BMI_girls_4_18y	Zhang, Lei, et al., 2022; Bloom et al., 2022; Hartman et al., 2017; Andersen et al., 2013; Mora et al., 2017; Chen et al., 2019; Chen et al., 2017; Manzano-Salgado et al., 2017	Liu et al., 2020	4.67916e-05	-0.000115193	0.000208776	0.315339	0.0110013	-0.00795961	0.0299622
PFOA_prenatal_BMI_girls_4_18y	Zhang, Lei, et al., 2022; Bloom et al., 2022; Hartman et al., 2017; Liu et al., 2020; Mora et al., 2017; Chen et al., 2019; Chen et al., 2017; Manzano-Salgado et al., 2017	Andersen et al., 2013	4.70545e-05	-0.00011493	0.000209039	0.310953	0.0145472	-0.00525437	0.0343489
PFOA_prenatal_BMI_girls_4_18y	Zhang, Lei, et al., 2022; Bloom et al., 2022; Hartman et al., 2017; Liu et al., 2020; Andersen et al., 2013; Chen et al., 2019; Chen et al., 2017; Manzano-Salgado et al., 2017	Mora et al., 2017	4.59248e-05	-0.000116062	0.000207911	0	0.00858977	-0.0119391	0.0291186
PFOA_prenatal_BMI_girls_4_18y	Zhang, Lei, et al., 2022; Bloom et al., 2022; Hartman et al., 2017; Liu et al., 2020; Andersen et al., 2013; Mora et al., 2017; Chen et al., 2017; Manzano-Salgado et al., 2017	Chen et al., 2019	-0.000968032	-0.00742572	0.00548965	0.309231	0.0123114	-0.00790497	0.0325278
PFOA_prenatal_BMI_girls_4_18y	Zhang, Lei, et al., 2022; Bloom et al., 2022; Hartman et al., 2017; Liu et al., 2020; Andersen et al., 2013; Mora et al., 2017; Chen et al., 2019; Manzano-Salgado et al., 2017	Chen et al., 2017	4.67656e-05	-0.000115218	0.000208749	0.247835	0.00599639	-0.0101756	0.0221684
PFOA_prenatal_BMI_girls_4_18y	Zhang, Lei, et al., 2022; Bloom et al., 2022; Hartman et al., 2017; Liu et al., 2020; Andersen et al., 2013; Mora et al., 2017; Chen et al., 2019; Chen et al., 2017	Manzano-Salgado et al., 2017	4.67735e-05	-0.00011521	0.000208757	0.297427	0.00842143	-0.00788113	0.024724
PFOS_prenatal_BMI_both_sexes_0_3y	Zhang, Pan, et al., 2022; Jensen et al., 2020; Andersen et al., 2010; Yeung et al., 2019	NONE	-0.0100793	-0.0188763	-0.00128221	0.381648	-0.00917309	-0.0209608	0.00261461
PFOS_prenatal_BMI_both_sexes_0_3y	Jensen et al., 2020; Andersen et al., 2010; Yeung et al., 2019	Zhang, Pan, et al., 2022	-0.0155625	-0.023207	-0.00791806	0	-0.0119511	-0.0303894	0.00648721
PFOS_prenatal_BMI_both_sexes_0_3y	Zhang, Pan, et al., 2022; Andersen et al., 2010; Yeung et al., 2019	Jensen et al., 2020	-0.0101179	-0.0216172	0.00138135	0.58772	-0.00921637	-0.025726	0.00729326
PFOS_prenatal_BMI_both_sexes_0_3y	Zhang, Pan, et al., 2022; Jensen et al., 2020; Yeung et al., 2019	Andersen et al., 2010	-0.010183	-0.0197602	-0.000605757	0.586895	-0.00999087	-0.0195018	-0.000479906
PFOS_prenatal_BMI_both_sexes_0_3y	Zhang, Pan, et al., 2022; Jensen et al., 2020; Andersen et al., 2010	Yeung et al., 2019	-0.00483951	-0.0118812	0.00220222	0	-0.00632384	-0.0237468	0.0110991
PFOS_prenatal_BMI_both_sexes_4_18y	Zhang, Lei, et al., 2022; Bloom et al., 2022; Lauritzen et al., 2018; Gyllenhammar et al., 2018; Sevelsted et al., 2022; Liu et al., 2020; Mora et al., 2017; Chen et al., 2019; Chen et al., 2017; Karlsen et al., 2017; Manzano-Salgado et al., 2017; Hoyer et al., 2015 - Greenland; Hoyer et al., 2015 - Ukraine; Vrijheid et al., 2020	NONE	0.000247073	-0.000899628	0.00139377	0.422217	0.000793871	-0.00564463	0.00723237
PFOS_prenatal_BMI_both_sexes_4_18y	Bloom et al., 2022; Lauritzen et al., 2018; Gyllenhammar et al., 2018; Sevelsted et al., 2022; Liu et al., 2020; Mora et al., 2017; Chen et al., 2019; Chen et al., 2017; Karlsen et al., 2017; Manzano-Salgado et al., 2017; Hoyer et al., 2015 - Greenland; Hoyer et al., 2015 - Ukraine; Vrijheid et al., 2020	Zhang, Lei, et al., 2022	0.000138425	-0.000950794	0.00122764	0.447942	0.000992415	-0.00582686	0.0078117
PFOS_prenatal_BMI_both_sexes_4_18y	Zhang, Lei, et al., 2022; Lauritzen et al., 2018; Gyllenhammar et al., 2018; Sevelsted et al., 2022; Liu et al., 2020; Mora et al., 2017; Chen et al., 2019; Chen et al., 2017; Karlsen et al., 2017; Manzano-Salgado et al., 2017; Hoyer et al., 2015 - Greenland; Hoyer et al., 2015 - Ukraine; Vrijheid et al., 2020	Bloom et al., 2022	0.00116415	-0.000738109	0.00306641	0.433217	0.00134636	-0.00576268	0.00845539
PFOS_prenatal_BMI_both_sexes_4_18y	Zhang, Lei, et al., 2022; Bloom et al., 2022; Gyllenhammar et al., 2018; Sevelsted et al., 2022; Liu et al., 2020; Mora et al., 2017; Chen et al., 2019; Chen et al., 2017; Karlsen et al., 2017; Manzano-Salgado et al., 2017; Hoyer et al., 2015 - Greenland; Hoyer et al., 2015 - Ukraine; Vrijheid et al., 2020	Lauritzen et al., 2018	0.000111797	-0.000898969	0.00112256	0.341502	-5.75721e-05	-0.00687615	0.00676101
PFOS_prenatal_BMI_both_sexes_4_18y	Zhang, Lei, et al., 2022; Bloom et al., 2022; Lauritzen et al., 2018; Sevelsted et al., 2022; Liu et al., 2020; Mora et al., 2017; Chen et al., 2019; Chen et al., 2017; Karlsen et al., 2017; Manzano-Salgado et al., 2017; Hoyer et al., 2015 - Greenland; Hoyer et al., 2015 - Ukraine; Vrijheid et al., 2020	Gyllenhammar et al., 2018	7.06455e-05	-0.000872578	0.00101387	0.217853	0.000138978	-0.00655036	0.00682831
PFOS_prenatal_BMI_both_sexes_4_18y	Zhang, Lei, et al., 2022; Bloom et al., 2022; Lauritzen et al., 2018; Gyllenhammar et al., 2018; Liu et al., 2020; Mora et al., 2017; Chen et al., 2019; Chen et al., 2017; Karlsen et al., 2017; Manzano-Salgado et al., 2017; Hoyer et al., 2015 - Greenland; Hoyer et al., 2015 - Ukraine; Vrijheid et al., 2020	Sevelsted et al., 2022	0.000284323	-0.000891862	0.00146051	0.422595	0.0035551	-0.00248067	0.00959087
PFOS_prenatal_BMI_both_sexes_4_18y	Zhang, Lei, et al., 2022; Bloom et al., 2022; Lauritzen et al., 2018; Gyllenhammar et al., 2018; Sevelsted et al., 2022; Mora et al., 2017; Chen et al., 2019; Chen et al., 2017; Karlsen et al., 2017; Manzano-Salgado et al., 2017; Hoyer et al., 2015 - Greenland; Hoyer et al., 2015 - Ukraine; Vrijheid et al., 2020	Liu et al., 2020	0.000551384	-0.00103591	0.00213868	0.46649	0.00119128	-0.00554245	0.007925
PFOS_prenatal_BMI_both_sexes_4_18y	Zhang, Lei, et al., 2022; Bloom et al., 2022; Lauritzen et al., 2018; Gyllenhammar et al., 2018; Sevelsted et al., 2022; Liu et al., 2020; Chen et al., 2019; Chen et al., 2017; Karlsen et al., 2017; Manzano-Salgado et al., 2017; Hoyer et al., 2015 - Greenland; Hoyer et al., 2015 - Ukraine; Vrijheid et al., 2020	Mora et al., 2017	-0.000101034	-0.000899214	0.000697146	0.279757	0.000668227	-0.00644557	0.00778203
PFOS_prenatal_BMI_both_sexes_4_18y	Zhang, Lei, et al., 2022; Bloom et al., 2022; Lauritzen et al., 2018; Gyllenhammar et al., 2018; Sevelsted et al., 2022; Liu et al., 2020; Mora et al., 2017; Chen et al., 2017; Karlsen et al., 2017; Manzano-Salgado et al., 2017; Hoyer et al., 2015 - Greenland; Hoyer et al., 2015 - Ukraine; Vrijheid et al., 2020	Chen et al., 2019	0.00177148	-0.00118952	0.00473248	0.454986	0.00116968	-0.0059323	0.00827167
PFOS_prenatal_BMI_both_sexes_4_18y	Zhang, Lei, et al., 2022; Bloom et al., 2022; Lauritzen et al., 2018; Gyllenhammar et al., 2018; Sevelsted et al., 2022; Liu et al., 2020; Mora et al., 2017; Chen et al., 2019; Karlsen et al., 2017; Manzano-Salgado et al., 2017; Hoyer et al., 2015 - Greenland; Hoyer et al., 2015 - Ukraine; Vrijheid et al., 2020	Chen et al., 2017	0.00148686	-0.00128758	0.00426129	0.46625	0.00139581	-0.00465439	0.00744601
PFOS_prenatal_BMI_both_sexes_4_18y	Zhang, Lei, et al., 2022; Bloom et al., 2022; Lauritzen et al., 2018; Gyllenhammar et al., 2018; Sevelsted et al., 2022; Liu et al., 2020; Mora et al., 2017; Chen et al., 2019; Chen et al., 2017; Manzano-Salgado et al., 2017; Hoyer et al., 2015 - Greenland; Hoyer et al., 2015 - Ukraine; Vrijheid et al., 2020	Karlsen et al., 2017	0.000217803	-0.000933508	0.00136911	0.46269	0.00103356	-0.00588233	0.00794945
PFOS_prenatal_BMI_both_sexes_4_18y	Zhang, Lei, et al., 2022; Bloom et al., 2022; Lauritzen et al., 2018; Gyllenhammar et al., 2018; Sevelsted et al., 2022; Liu et al., 2020; Mora et al., 2017; Chen et al., 2019; Chen et al., 2017; Karlsen et al., 2017; Hoyer et al., 2015 - Greenland; Hoyer et al., 2015 - Ukraine; Vrijheid et al., 2020	Manzano-Salgado et al., 2017	0.000224889	-0.000907065	0.00135684	0.459959	0.000415904	-0.00622106	0.00705287
PFOS_prenatal_BMI_both_sexes_4_18y	Zhang, Lei, et al., 2022; Bloom et al., 2022; Lauritzen et al., 2018; Gyllenhammar et al., 2018; Sevelsted et al., 2022; Liu et al., 2020; Mora et al., 2017; Chen et al., 2019; Chen et al., 2017; Karlsen et al., 2017; Manzano-Salgado et al., 2017; Hoyer et al., 2015 - Ukraine; Vrijheid et al., 2020	Hoyer et al., 2015 - Greenland	0.000332007	-0.000894775	0.00155879	0.458008	0.0014445	-0.00552339	0.0084124
PFOS_prenatal_BMI_both_sexes_4_18y	Zhang, Lei, et al., 2022; Bloom et al., 2022; Lauritzen et al., 2018; Gyllenhammar et al., 2018; Sevelsted et al., 2022; Liu et al., 2020; Mora et al., 2017; Chen et al., 2019; Chen et al., 2017; Karlsen et al., 2017; Manzano-Salgado et al., 2017; Hoyer et al., 2015 - Greenland; Vrijheid et al., 2020	Hoyer et al., 2015 - Ukraine	0.00155105	-0.00138343	0.00448552	0.463832	0.000623207	-0.00565815	0.00690456
PFOS_prenatal_BMI_both_sexes_4_18y	Zhang, Lei, et al., 2022; Bloom et al., 2022; Lauritzen et al., 2018; Gyllenhammar et al., 2018; Sevelsted et al., 2022; Liu et al., 2020; Mora et al., 2017; Chen et al., 2019; Chen et al., 2017; Karlsen et al., 2017; Manzano-Salgado et al., 2017; Hoyer et al., 2015 - Greenland; Hoyer et al., 2015 - Ukraine	Vrijheid et al., 2020	0.00111736	-0.000832935	0.00306765	0.448382	0.00139342	-0.00597522	0.00876207
PFOS_prenatal_BMI_boys_0_3y	Romano et al., 2022; Zhang, Pan, et al., 2022; Jensen et al., 2020; Yeung et al., 2019	NONE	-0.00235437	-0.00711228	0.00240354	0.210009	-0.00603123	-0.0128049	0.000742401
PFOS_prenatal_BMI_boys_0_3y	Zhang, Pan, et al., 2022; Jensen et al., 2020; Yeung et al., 2019	Romano et al., 2022	-0.00565826	-0.0119494	0.000632932	0	-0.00641714	-0.0141542	0.00131992
PFOS_prenatal_BMI_boys_0_3y	Romano et al., 2022; Jensen et al., 2020; Yeung et al., 2019	Zhang, Pan, et al., 2022	-0.00285682	-0.0104623	0.00474864	0.268811	-0.00629066	-0.016545	0.0039637
PFOS_prenatal_BMI_boys_0_3y	Romano et al., 2022; Zhang, Pan, et al., 2022; Yeung et al., 2019	Jensen et al., 2020	-0.00227261	-0.00707381	0.00252859	0.459749	-0.00582332	-0.0127444	0.0010978
PFOS_prenatal_BMI_boys_0_3y	Romano et al., 2022; Zhang, Pan, et al., 2022; Jensen et al., 2020	Yeung et al., 2019	-0.000203321	-0.00163076	0.00122412	0	-0.00318801	-0.01092	0.00454399
PFOS_prenatal_BMI_boys_4_18y	Zhang, Lei, et al., 2022; Bloom et al., 2022; Liu et al., 2020; Andersen et al., 2013; Mora et al., 2017; Chen et al., 2019; Chen et al., 2017; Manzano-Salgado et al., 2017	NONE	0.000185347	-0.0029022	0.0032729	0	-0.00255422	-0.0127981	0.00768968
PFOS_prenatal_BMI_boys_4_18y	Bloom et al., 2022; Liu et al., 2020; Andersen et al., 2013; Mora et al., 2017; Chen et al., 2019; Chen et al., 2017; Manzano-Salgado et al., 2017	Zhang, Lei, et al., 2022	0.000249159	-0.00147104	0.00196936	0	-0.00408725	-0.0139007	0.00572617
PFOS_prenatal_BMI_boys_4_18y	Zhang, Lei, et al., 2022; Liu et al., 2020; Andersen et al., 2013; Mora et al., 2017; Chen et al., 2019; Chen et al., 2017; Manzano-Salgado et al., 2017	Bloom et al., 2022	0.000193749	-0.00164834	0.00203583	0.0219236	-0.00412059	-0.0146846	0.00644339
PFOS_prenatal_BMI_boys_4_18y	Zhang, Lei, et al., 2022; Bloom et al., 2022; Andersen et al., 2013; Mora et al., 2017; Chen et al., 2019; Chen et al., 2017; Manzano-Salgado et al., 2017	Liu et al., 2020	0.000311356	-0.00159428	0.00221699	0.0431147	-0.00357615	-0.0130358	0.00588349
PFOS_prenatal_BMI_boys_4_18y	Zhang, Lei, et al., 2022; Bloom et al., 2022; Liu et al., 2020; Mora et al., 2017; Chen et al., 2019; Chen et al., 2017; Manzano-Salgado et al., 2017	Andersen et al., 2013	0.000868362	-0.00168538	0.00342211	0	-0.00309565	-0.0137484	0.00755711
PFOS_prenatal_BMI_boys_4_18y	Zhang, Lei, et al., 2022; Bloom et al., 2022; Liu et al., 2020; Andersen et al., 2013; Chen et al., 2019; Chen et al., 2017; Manzano-Salgado et al., 2017	Mora et al., 2017	0.000183854	-0.00145206	0.00181977	0	-0.00452012	-0.0152911	0.00625086
PFOS_prenatal_BMI_boys_4_18y	Zhang, Lei, et al., 2022; Bloom et al., 2022; Liu et al., 2020; Andersen et al., 2013; Mora et al., 2017; Chen et al., 2017; Manzano-Salgado et al., 2017	Chen et al., 2019	0.000200092	-0.00310018	0.00350036	0.0430344	-0.00383918	-0.0140876	0.00640926
PFOS_prenatal_BMI_boys_4_18y	Zhang, Lei, et al., 2022; Bloom et al., 2022; Liu et al., 2020; Andersen et al., 2013; Mora et al., 2017; Chen et al., 2019; Manzano-Salgado et al., 2017	Chen et al., 2017	0.000377666	-0.00120497	0.0019603	0	0.00111778	-0.00745468	0.00969024
PFOS_prenatal_BMI_boys_4_18y	Zhang, Lei, et al., 2022; Bloom et al., 2022; Liu et al., 2020; Andersen et al., 2013; Mora et al., 2017; Chen et al., 2019; Chen et al., 2017	Manzano-Salgado et al., 2017	0.000311299	-0.00141558	0.00203818	0.0368861	-0.00509538	-0.0123358	0.00214509
PFOS_prenatal_BMI_girls_0_3y	Romano et al., 2022; Zhang, Pan, et al., 2022; Jensen et al., 2020; Yeung et al., 2019	NONE	-0.00650131	-0.0186233	0.00562066	0.778744	-0.00859524	-0.0198359	0.00264544
PFOS_prenatal_BMI_girls_0_3y	Zhang, Pan, et al., 2022; Jensen et al., 2020; Yeung et al., 2019	Romano et al., 2022	-0.0101695	-0.0269218	0.00658274	0.799962	-0.0101278	-0.0286168	0.00836122
PFOS_prenatal_BMI_girls_0_3y	Romano et al., 2022; Jensen et al., 2020; Yeung et al., 2019	Zhang, Pan, et al., 2022	-0.0100177	-0.0263112	0.00627576	0.851943	-0.0138958	-0.03367	0.00587833
PFOS_prenatal_BMI_girls_0_3y	Romano et al., 2022; Zhang, Pan, et al., 2022; Yeung et al., 2019	Jensen et al., 2020	-0.00629157	-0.0206733	0.00809014	0.84761	-0.00822879	-0.0196773	0.00321968
PFOS_prenatal_BMI_girls_0_3y	Romano et al., 2022; Zhang, Pan, et al., 2022; Jensen et al., 2020	Yeung et al., 2019	0.00020462	-0.000686437	0.00109568	0	-0.00196171	-0.010673	0.00674962
PFOS_prenatal_BMI_girls_4_18y	Zhang, Lei, et al., 2022; Bloom et al., 2022; Hartman et al., 2017; Liu et al., 2020; Andersen et al., 2013; Mora et al., 2017; Chen et al., 2019; Chen et al., 2017; Manzano-Salgado et al., 2017	NONE	-0.000592624	-0.00325636	0.00207111	0.559985	0.00654432	-0.00192768	0.0150163
PFOS_prenatal_BMI_girls_4_18y	Bloom et al., 2022; Hartman et al., 2017; Liu et al., 2020; Andersen et al., 2013; Mora et al., 2017; Chen et al., 2019; Chen et al., 2017; Manzano-Salgado et al., 2017	Zhang, Lei, et al., 2022	-0.000587428	-0.00366401	0.00248916	0.614968	0.0074087	-0.00111238	0.0159298
PFOS_prenatal_BMI_girls_4_18y	Zhang, Lei, et al., 2022; Hartman et al., 2017; Liu et al., 2020; Andersen et al., 2013; Mora et al., 2017; Chen et al., 2019; Chen et al., 2017; Manzano-Salgado et al., 2017	Bloom et al., 2022	4.27864e-05	-0.00250138	0.00258695	0.495044	0.00853654	-0.000448055	0.0175211
PFOS_prenatal_BMI_girls_4_18y	Zhang, Lei, et al., 2022; Bloom et al., 2022; Liu et al., 2020; Andersen et al., 2013; Mora et al., 2017; Chen et al., 2019; Chen et al., 2017; Manzano-Salgado et al., 2017	Hartman et al., 2017	-0.000123148	-0.00339363	0.00314733	0.49428	0.0080914	-0.0010306	0.0172134
PFOS_prenatal_BMI_girls_4_18y	Zhang, Lei, et al., 2022; Bloom et al., 2022; Hartman et al., 2017; Andersen et al., 2013; Mora et al., 2017; Chen et al., 2019; Chen et al., 2017; Manzano-Salgado et al., 2017	Liu et al., 2020	-0.000647459	-0.00317136	0.00187644	0.614591	0.00728696	-0.000956955	0.0155309
PFOS_prenatal_BMI_girls_4_18y	Zhang, Lei, et al., 2022; Bloom et al., 2022; Hartman et al., 2017; Liu et al., 2020; Mora et al., 2017; Chen et al., 2019; Chen et al., 2017; Manzano-Salgado et al., 2017	Andersen et al., 2013	-0.00034723	-0.00319028	0.00249582	0.603148	0.00841355	-0.000671747	0.0174988
PFOS_prenatal_BMI_girls_4_18y	Zhang, Lei, et al., 2022; Bloom et al., 2022; Hartman et al., 2017; Liu et al., 2020; Andersen et al., 2013; Chen et al., 2019; Chen et al., 2017; Manzano-Salgado et al., 2017	Mora et al., 2017	-0.00124862	-0.00298134	0.000484094	0.487498	0.00695971	-0.0021718	0.0160912
PFOS_prenatal_BMI_girls_4_18y	Zhang, Lei, et al., 2022; Bloom et al., 2022; Hartman et al., 2017; Liu et al., 2020; Andersen et al., 2013; Mora et al., 2017; Chen et al., 2017; Manzano-Salgado et al., 2017	Chen et al., 2019	-0.000654336	-0.00407002	0.00276135	0.50342	0.00762307	-0.00130813	0.0165543
PFOS_prenatal_BMI_girls_4_18y	Zhang, Lei, et al., 2022; Bloom et al., 2022; Hartman et al., 2017; Liu et al., 2020; Andersen et al., 2013; Mora et al., 2017; Chen et al., 2019; Manzano-Salgado et al., 2017	Chen et al., 2017	-0.000801626	-0.00234075	0.000737502	0.508172	0.00174191	-0.00480285	0.00828668
PFOS_prenatal_BMI_girls_4_18y	Zhang, Lei, et al., 2022; Bloom et al., 2022; Hartman et al., 2017; Liu et al., 2020; Andersen et al., 2013; Mora et al., 2017; Chen et al., 2019; Chen et al., 2017	Manzano-Salgado et al., 2017	-0.000711988	-0.00316109	0.00173711	0.60473	0.00604587	-0.00104966	0.0131414
PFHxS_prenatal_BMI_both_sexes_4_18y	Zhang, Lei, et al., 2022; Bloom et al., 2022; Gyllenhammar et al., 2018; Liu et al., 2020; Mora et al., 2017; Chen et al., 2019; Karlsen et al., 2017; Manzano-Salgado et al., 2017; Vrijheid et al., 2020	NONE	-6.43753e-07	-0.00714894	0.00714765	0	-0.000874569	-0.0599596	0.0582104
PFHxS_prenatal_BMI_both_sexes_4_18y	Bloom et al., 2022; Gyllenhammar et al., 2018; Liu et al., 2020; Mora et al., 2017; Chen et al., 2019; Karlsen et al., 2017; Manzano-Salgado et al., 2017; Vrijheid et al., 2020	Zhang, Lei, et al., 2022	-0.00022631	-0.00725843	0.00680582	0	0.0162418	-0.041394	0.0738775
PFHxS_prenatal_BMI_both_sexes_4_18y	Zhang, Lei, et al., 2022; Gyllenhammar et al., 2018; Liu et al., 2020; Mora et al., 2017; Chen et al., 2019; Karlsen et al., 2017; Manzano-Salgado et al., 2017; Vrijheid et al., 2020	Bloom et al., 2022	0.000526635	-0.00678986	0.00784312	0	0.0235288	-0.0374483	0.0845059
PFHxS_prenatal_BMI_both_sexes_4_18y	Zhang, Lei, et al., 2022; Bloom et al., 2022; Liu et al., 2020; Mora et al., 2017; Chen et al., 2019; Karlsen et al., 2017; Manzano-Salgado et al., 2017; Vrijheid et al., 2020	Gyllenhammar et al., 2018	-0.000566014	-0.00774013	0.0066081	0	0.0166386	-0.0409516	0.0742287
PFHxS_prenatal_BMI_both_sexes_4_18y	Zhang, Lei, et al., 2022; Bloom et al., 2022; Gyllenhammar et al., 2018; Mora et al., 2017; Chen et al., 2019; Karlsen et al., 2017; Manzano-Salgado et al., 2017; Vrijheid et al., 2020	Liu et al., 2020	-0.000134599	-0.00711871	0.00684951	0	-0.0113945	-0.0567362	0.0339472
PFHxS_prenatal_BMI_both_sexes_4_18y	Zhang, Lei, et al., 2022; Bloom et al., 2022; Gyllenhammar et al., 2018; Liu et al., 2020; Chen et al., 2019; Karlsen et al., 2017; Manzano-Salgado et al., 2017; Vrijheid et al., 2020	Mora et al., 2017	-0.000601831	-0.00950868	0.00830502	0	0.0185287	-0.0442774	0.0813347
PFHxS_prenatal_BMI_both_sexes_4_18y	Zhang, Lei, et al., 2022; Bloom et al., 2022; Gyllenhammar et al., 2018; Liu et al., 2020; Mora et al., 2017; Karlsen et al., 2017; Manzano-Salgado et al., 2017; Vrijheid et al., 2020	Chen et al., 2019	0.00498533	-0.0107783	0.0207489	0	0.0184887	-0.0412081	0.0781854
PFHxS_prenatal_BMI_both_sexes_4_18y	Zhang, Lei, et al., 2022; Bloom et al., 2022; Gyllenhammar et al., 2018; Liu et al., 2020; Mora et al., 2017; Chen et al., 2019; Manzano-Salgado et al., 2017; Vrijheid et al., 2020	Karlsen et al., 2017	-0.000149851	-0.00760182	0.00730211	0	0.0150538	-0.0437216	0.0738291
PFHxS_prenatal_BMI_both_sexes_4_18y	Zhang, Lei, et al., 2022; Bloom et al., 2022; Gyllenhammar et al., 2018; Liu et al., 2020; Mora et al., 2017; Chen et al., 2019; Karlsen et al., 2017; Vrijheid et al., 2020	Manzano-Salgado et al., 2017	0.000148249	-0.0070167	0.0073132	0	0.0303745	-0.0279581	0.0887071
PFHxS_prenatal_BMI_both_sexes_4_18y	Zhang, Lei, et al., 2022; Bloom et al., 2022; Gyllenhammar et al., 2018; Liu et al., 2020; Mora et al., 2017; Chen et al., 2019; Karlsen et al., 2017; Manzano-Salgado et al., 2017	Vrijheid et al., 2020	4.55644e-06	-0.00707601	0.00708512	0	0.0243277	-0.0269574	0.0756127
PFHxS_prenatal_BMI_boys_0_3y	Romano et al., 2022; Zhang, Pan, et al., 2022; Jensen et al., 2020	NONE	-0.0022519	-0.00538396	0.000880164	0	0.0159212	-0.0998185	0.131661
PFHxS_prenatal_BMI_boys_0_3y	Zhang, Pan, et al., 2022; Jensen et al., 2020	Romano et al., 2022	-0.00313351	-0.111452	0.105185	0	0.0368173	-0.13802	0.211655
PFHxS_prenatal_BMI_boys_0_3y	Romano et al., 2022; Jensen et al., 2020	Zhang, Pan, et al., 2022	-0.00224528	-0.00537858	0.000888019	0	0.0711832	-0.189795	0.332161
PFHxS_prenatal_BMI_boys_0_3y	Romano et al., 2022; Zhang, Pan, et al., 2022	Jensen et al., 2020	-0.00225777	-0.0053899	0.00087436	0	-0.00818353	-0.0872713	0.0709043
PFHxS_prenatal_BMI_boys_4_18y	Zhang, Lei, et al., 2022; Bloom et al., 2022; Liu et al., 2020; Mora et al., 2017; Chen et al., 2019; Manzano-Salgado et al., 2017	NONE	0.00398906	-0.0107991	0.0187772	0	-0.0694162	-0.153436	0.0146036
PFHxS_prenatal_BMI_boys_4_18y	Bloom et al., 2022; Liu et al., 2020; Mora et al., 2017; Chen et al., 2019; Manzano-Salgado et al., 2017	Zhang, Lei, et al., 2022	0.0038983	-0.0109553	0.0187519	0	-0.0868269	-0.201438	0.0277837
PFHxS_prenatal_BMI_boys_4_18y	Zhang, Lei, et al., 2022; Liu et al., 2020; Mora et al., 2017; Chen et al., 2019; Manzano-Salgado et al., 2017	Bloom et al., 2022	0.00481546	-0.0102099	0.0198409	0	-0.0887843	-0.215255	0.0376863
PFHxS_prenatal_BMI_boys_4_18y	Zhang, Lei, et al., 2022; Bloom et al., 2022; Mora et al., 2017; Chen et al., 2019; Manzano-Salgado et al., 2017	Liu et al., 2020	0.00410476	-0.0106868	0.0188964	0	-0.0399054	-0.102027	0.0222161
PFHxS_prenatal_BMI_boys_4_18y	Zhang, Lei, et al., 2022; Bloom et al., 2022; Liu et al., 2020; Chen et al., 2019; Manzano-Salgado et al., 2017	Mora et al., 2017	0.00657743	-0.0102562	0.0234111	0	-0.0958515	-0.228124	0.0364206
PFHxS_prenatal_BMI_boys_4_18y	Zhang, Lei, et al., 2022; Bloom et al., 2022; Liu et al., 2020; Mora et al., 2017; Manzano-Salgado et al., 2017	Chen et al., 2019	-0.00894128	-0.0372109	0.0193284	0	-0.0907866	-0.212499	0.0309258
PFHxS_prenatal_BMI_boys_4_18y	Zhang, Lei, et al., 2022; Bloom et al., 2022; Liu et al., 2020; Mora et al., 2017; Chen et al., 2019	Manzano-Salgado et al., 2017	0.00470656	-0.0101184	0.0195315	0	-0.055887	-0.175265	0.0634909
PFHxS_prenatal_BMI_girls_0_3y	Romano et al., 2022; Zhang, Pan, et al., 2022; Jensen et al., 2020	NONE	0.0343446	-0.0359573	0.104647	0.325194	0.0806355	-0.0196805	0.180952
PFHxS_prenatal_BMI_girls_0_3y	Zhang, Pan, et al., 2022; Jensen et al., 2020	Romano et al., 2022	0.0899456	-0.00890633	0.188797	0	0.0811733	-0.0215512	0.183898
PFHxS_prenatal_BMI_girls_0_3y	Romano et al., 2022; Jensen et al., 2020	Zhang, Pan, et al., 2022	0.00748908	-0.0118381	0.0268163	0	0.0193634	-0.0952295	0.133956
PFHxS_prenatal_BMI_girls_0_3y	Romano et al., 2022; Zhang, Pan, et al., 2022	Jensen et al., 2020	0.0408176	-0.0507963	0.132432	0.658883	0.0764187	-0.0387434	0.191581
PFHxS_prenatal_BMI_girls_4_18y	Zhang, Lei, et al., 2022; Bloom et al., 2022; Hartman et al., 2017; Liu et al., 2020; Mora et al., 2017; Chen et al., 2019; Manzano-Salgado et al., 2017	NONE	-0.00144979	-0.00504527	0.0021457	0	0.0221127	-0.0347672	0.0789927
PFHxS_prenatal_BMI_girls_4_18y	Bloom et al., 2022; Hartman et al., 2017; Liu et al., 2020; Mora et al., 2017; Chen et al., 2019; Manzano-Salgado et al., 2017	Zhang, Lei, et al., 2022	-0.00154646	-0.00482951	0.00173658	0	0.0342833	-0.0352697	0.103836
PFHxS_prenatal_BMI_girls_4_18y	Zhang, Lei, et al., 2022; Hartman et al., 2017; Liu et al., 2020; Mora et al., 2017; Chen et al., 2019; Manzano-Salgado et al., 2017	Bloom et al., 2022	-0.00137225	-0.0048831	0.0021386	0	0.0468545	-0.0272454	0.120954
PFHxS_prenatal_BMI_girls_4_18y	Zhang, Lei, et al., 2022; Bloom et al., 2022; Liu et al., 2020; Mora et al., 2017; Chen et al., 2019; Manzano-Salgado et al., 2017	Hartman et al., 2017	-0.00224349	-0.00647823	0.00199126	0	0.0388898	-0.0364286	0.114208
PFHxS_prenatal_BMI_girls_4_18y	Zhang, Lei, et al., 2022; Bloom et al., 2022; Hartman et al., 2017; Mora et al., 2017; Chen et al., 2019; Manzano-Salgado et al., 2017	Liu et al., 2020	-0.00144765	-0.00358261	0.000687315	0	0.00173881	-0.0389573	0.0424349
PFHxS_prenatal_BMI_girls_4_18y	Zhang, Lei, et al., 2022; Bloom et al., 2022; Hartman et al., 2017; Liu et al., 2020; Chen et al., 2019; Manzano-Salgado et al., 2017	Mora et al., 2017	-0.00166557	-0.00567249	0.00234136	0	0.0378156	-0.0396175	0.115249
PFHxS_prenatal_BMI_girls_4_18y	Zhang, Lei, et al., 2022; Bloom et al., 2022; Hartman et al., 2017; Liu et al., 2020; Mora et al., 2017; Manzano-Salgado et al., 2017	Chen et al., 2019	-0.000778691	-0.0040252	0.00246782	0	0.0376707	-0.0349051	0.110246
PFHxS_prenatal_BMI_girls_4_18y	Zhang, Lei, et al., 2022; Bloom et al., 2022; Hartman et al., 2017; Liu et al., 2020; Mora et al., 2017; Chen et al., 2019	Manzano-Salgado et al., 2017	-0.0014833	-0.00469893	0.00173233	0	0.0339181	-0.0335037	0.10134
PFNA_prenatal_BMI_both_sexes_4_18y	Zhang, Lei, et al., 2022; Bloom et al., 2022; Gyllenhammar et al., 2018; Liu et al., 2020; Mora et al., 2017; Chen et al., 2019; Karlsen et al., 2017; Manzano-Salgado et al., 2017; Vrijheid et al., 2020	NONE	-0.000128418	-0.0032857	0.00302887	0	0.0655809	-0.025231	0.156393
PFNA_prenatal_BMI_both_sexes_4_18y	Bloom et al., 2022; Gyllenhammar et al., 2018; Liu et al., 2020; Mora et al., 2017; Chen et al., 2019; Karlsen et al., 2017; Manzano-Salgado et al., 2017; Vrijheid et al., 2020	Zhang, Lei, et al., 2022	-0.000141691	-0.00331714	0.00303376	0	0.0917339	-0.0455006	0.228968
PFNA_prenatal_BMI_both_sexes_4_18y	Zhang, Lei, et al., 2022; Gyllenhammar et al., 2018; Liu et al., 2020; Mora et al., 2017; Chen et al., 2019; Karlsen et al., 2017; Manzano-Salgado et al., 2017; Vrijheid et al., 2020	Bloom et al., 2022	-0.000109386	-0.00326798	0.00304921	0	0.100886	-0.0441684	0.245941
PFNA_prenatal_BMI_both_sexes_4_18y	Zhang, Lei, et al., 2022; Bloom et al., 2022; Liu et al., 2020; Mora et al., 2017; Chen et al., 2019; Karlsen et al., 2017; Manzano-Salgado et al., 2017; Vrijheid et al., 2020	Gyllenhammar et al., 2018	-0.000142968	-0.00330031	0.00301437	0	0.0616889	-0.0696335	0.193011
PFNA_prenatal_BMI_both_sexes_4_18y	Zhang, Lei, et al., 2022; Bloom et al., 2022; Gyllenhammar et al., 2018; Mora et al., 2017; Chen et al., 2019; Karlsen et al., 2017; Manzano-Salgado et al., 2017; Vrijheid et al., 2020	Liu et al., 2020	-0.000120735	-0.00341864	0.00317717	0	0.0598438	-0.00452051	0.124208
PFNA_prenatal_BMI_both_sexes_4_18y	Zhang, Lei, et al., 2022; Bloom et al., 2022; Gyllenhammar et al., 2018; Liu et al., 2020; Chen et al., 2019; Karlsen et al., 2017; Manzano-Salgado et al., 2017; Vrijheid et al., 2020	Mora et al., 2017	-0.000175672	-0.00333355	0.00298221	0	0.0787975	-0.0677446	0.22534
PFNA_prenatal_BMI_both_sexes_4_18y	Zhang, Lei, et al., 2022; Bloom et al., 2022; Gyllenhammar et al., 2018; Liu et al., 2020; Mora et al., 2017; Karlsen et al., 2017; Manzano-Salgado et al., 2017; Vrijheid et al., 2020	Chen et al., 2019	0.00673557	-0.0190648	0.032536	0	0.0946731	-0.0468208	0.236167
PFNA_prenatal_BMI_both_sexes_4_18y	Zhang, Lei, et al., 2022; Bloom et al., 2022; Gyllenhammar et al., 2018; Liu et al., 2020; Mora et al., 2017; Chen et al., 2019; Manzano-Salgado et al., 2017; Vrijheid et al., 2020	Karlsen et al., 2017	-0.000128608	-0.00328823	0.00303101	0	0.0942232	-0.0463814	0.234828
PFNA_prenatal_BMI_both_sexes_4_18y	Zhang, Lei, et al., 2022; Bloom et al., 2022; Gyllenhammar et al., 2018; Liu et al., 2020; Mora et al., 2017; Chen et al., 2019; Karlsen et al., 2017; Vrijheid et al., 2020	Manzano-Salgado et al., 2017	-0.000173464	-0.00333164	0.00298471	0	0.0864769	-0.0633996	0.236353
PFNA_prenatal_BMI_both_sexes_4_18y	Zhang, Lei, et al., 2022; Bloom et al., 2022; Gyllenhammar et al., 2018; Liu et al., 2020; Mora et al., 2017; Chen et al., 2019; Karlsen et al., 2017; Manzano-Salgado et al., 2017	Vrijheid et al., 2020	-0.000128454	-0.00328618	0.00302928	0	0.10354	-0.0460199	0.2531
PFNA_prenatal_BMI_boys_0_3y	Romano et al., 2022; Zhang, Pan, et al., 2022; Jensen et al., 2020	NONE	-0.00834016	-0.0183252	0.00164488	0	0.000891829	-0.0495364	0.0513201
PFNA_prenatal_BMI_boys_0_3y	Zhang, Pan, et al., 2022; Jensen et al., 2020	Romano et al., 2022	-0.0132304	-0.0795797	0.053119	0.103645	0.0182498	-0.0723577	0.108857
PFNA_prenatal_BMI_boys_0_3y	Romano et al., 2022; Jensen et al., 2020	Zhang, Pan, et al., 2022	-0.00744237	-0.0177217	0.00283693	0	0.0521166	-0.0729017	0.177135
PFNA_prenatal_BMI_boys_0_3y	Romano et al., 2022; Zhang, Pan, et al., 2022	Jensen et al., 2020	-0.00855395	-0.0185488	0.00144094	0	-0.0188096	-0.0488191	0.0111998
PFNA_prenatal_BMI_boys_4_18y	Zhang, Lei, et al., 2022; Bloom et al., 2022; Liu et al., 2020; Mora et al., 2017; Chen et al., 2019; Manzano-Salgado et al., 2017	NONE	0.00224038	-0.00519587	0.00967664	0.169535	0.185053	0.0279956	0.342109
PFNA_prenatal_BMI_boys_4_18y	Bloom et al., 2022; Liu et al., 2020; Mora et al., 2017; Chen et al., 2019; Manzano-Salgado et al., 2017	Zhang, Lei, et al., 2022	0.0133115	-0.0313573	0.0579803	0.318805	0.29969	0.0300823	0.569299
PFNA_prenatal_BMI_boys_4_18y	Zhang, Lei, et al., 2022; Liu et al., 2020; Mora et al., 2017; Chen et al., 2019; Manzano-Salgado et al., 2017	Bloom et al., 2022	0.00218258	-0.00572797	0.0100931	0.3181	0.320885	0.030453	0.611317
PFNA_prenatal_BMI_boys_4_18y	Zhang, Lei, et al., 2022; Bloom et al., 2022; Mora et al., 2017; Chen et al., 2019; Manzano-Salgado et al., 2017	Liu et al., 2020	0.00220466	-0.00487467	0.00928398	0	0.0611593	-0.0286551	0.150974
PFNA_prenatal_BMI_boys_4_18y	Zhang, Lei, et al., 2022; Bloom et al., 2022; Liu et al., 2020; Chen et al., 2019; Manzano-Salgado et al., 2017	Mora et al., 2017	0.00222874	-0.00617848	0.010636	0.319766	0.326905	0.0317083	0.622101
PFNA_prenatal_BMI_boys_4_18y	Zhang, Lei, et al., 2022; Bloom et al., 2022; Liu et al., 2020; Mora et al., 2017; Manzano-Salgado et al., 2017	Chen et al., 2019	0.0180268	-0.0475002	0.0835537	0.326883	0.312632	0.0291601	0.596105
PFNA_prenatal_BMI_boys_4_18y	Zhang, Lei, et al., 2022; Bloom et al., 2022; Liu et al., 2020; Mora et al., 2017; Chen et al., 2019	Manzano-Salgado et al., 2017	0.00203763	-0.00634043	0.0104157	0	0.300675	-0.00334098	0.604691
PFNA_prenatal_BMI_girls_0_3y	Romano et al., 2022; Zhang, Pan, et al., 2022; Jensen et al., 2020	NONE	0.0216126	-0.00308876	0.046314	0.520967	0.0587869	-0.00225496	0.119829
PFNA_prenatal_BMI_girls_0_3y	Zhang, Pan, et al., 2022; Jensen et al., 2020	Romano et al., 2022	0.111658	-0.118522	0.341838	0.756486	0.0975431	-0.134299	0.329385
PFNA_prenatal_BMI_girls_0_3y	Romano et al., 2022; Jensen et al., 2020	Zhang, Pan, et al., 2022	0.111448	-0.118329	0.341225	0.758517	0.147011	-0.0931093	0.387132
PFNA_prenatal_BMI_girls_0_3y	Romano et al., 2022; Zhang, Pan, et al., 2022	Jensen et al., 2020	0.0188311	-0.00598671	0.043649	0	0.0187549	-0.0106295	0.0481392
PFNA_prenatal_BMI_girls_4_18y	Zhang, Lei, et al., 2022; Bloom et al., 2022; Hartman et al., 2017; Liu et al., 2020; Mora et al., 2017; Chen et al., 2019; Manzano-Salgado et al., 2017	NONE	-0.000198675	-0.00271417	0.00231683	0.0536733	0.097607	-0.0355096	0.230724
PFNA_prenatal_BMI_girls_4_18y	Bloom et al., 2022; Hartman et al., 2017; Liu et al., 2020; Mora et al., 2017; Chen et al., 2019; Manzano-Salgado et al., 2017	Zhang, Lei, et al., 2022	-0.000285748	-0.00381814	0.00324665	0.143096	0.145882	-0.0668815	0.358646
PFNA_prenatal_BMI_girls_4_18y	Zhang, Lei, et al., 2022; Hartman et al., 2017; Liu et al., 2020; Mora et al., 2017; Chen et al., 2019; Manzano-Salgado et al., 2017	Bloom et al., 2022	-0.000243756	-0.00214387	0.00165636	0.00841258	0.173814	-0.0548422	0.402471
PFNA_prenatal_BMI_girls_4_18y	Zhang, Lei, et al., 2022; Bloom et al., 2022; Liu et al., 2020; Mora et al., 2017; Chen et al., 2019; Manzano-Salgado et al., 2017	Hartman et al., 2017	-0.00014229	-0.0034713	0.00318672	0.188585	0.156429	-0.0730434	0.385902
PFNA_prenatal_BMI_girls_4_18y	Zhang, Lei, et al., 2022; Bloom et al., 2022; Hartman et al., 2017; Mora et al., 2017; Chen et al., 2019; Manzano-Salgado et al., 2017	Liu et al., 2020	-0.000220719	-0.00254496	0.00210352	0.00531548	0.0282062	-0.0354763	0.0918886
PFNA_prenatal_BMI_girls_4_18y	Zhang, Lei, et al., 2022; Bloom et al., 2022; Hartman et al., 2017; Liu et al., 2020; Chen et al., 2019; Manzano-Salgado et al., 2017	Mora et al., 2017	-0.000178942	-0.00314906	0.00279117	0	0.119256	-0.112109	0.35062
PFNA_prenatal_BMI_girls_4_18y	Zhang, Lei, et al., 2022; Bloom et al., 2022; Hartman et al., 2017; Liu et al., 2020; Mora et al., 2017; Manzano-Salgado et al., 2017	Chen et al., 2019	0.00720082	-0.0113619	0.0257636	0.121625	0.15261	-0.0688666	0.374086
PFNA_prenatal_BMI_girls_4_18y	Zhang, Lei, et al., 2022; Bloom et al., 2022; Hartman et al., 2017; Liu et al., 2020; Mora et al., 2017; Chen et al., 2019	Manzano-Salgado et al., 2017	5.07601e-06	-0.00396732	0.00397747	0.211393	0.167912	-0.0718518	0.407676
PFDA_prenatal_BMI_both_sexes_4_18y	Zhang, Lei, et al., 2022; Bloom et al., 2022; Chen et al., 2019; Karlsen et al., 2017	NONE	-0.000733698	-0.00298853	0.00152113	0	-0.0815672	-0.26045	0.0973159
PFDA_prenatal_BMI_both_sexes_4_18y	Bloom et al., 2022; Chen et al., 2019; Karlsen et al., 2017	Zhang, Lei, et al., 2022	-0.000748977	-0.00300776	0.0015098	0	-0.0825885	-0.25985	0.0946728
PFDA_prenatal_BMI_both_sexes_4_18y	Zhang, Lei, et al., 2022; Chen et al., 2019; Karlsen et al., 2017	Bloom et al., 2022	-0.000728748	-0.00298361	0.00152611	0	-0.00913807	-0.0557431	0.037467
PFDA_prenatal_BMI_both_sexes_4_18y	Zhang, Lei, et al., 2022; Bloom et al., 2022; Karlsen et al., 2017	Chen et al., 2019	-0.000254596	-0.0366565	0.0361473	0	-0.0894633	-0.284114	0.105188
PFDA_prenatal_BMI_both_sexes_4_18y	Zhang, Lei, et al., 2022; Bloom et al., 2022; Chen et al., 2019	Karlsen et al., 2017	-0.000725258	-0.00298044	0.00152993	0	-0.079685	-0.267283	0.107913
PFDA_prenatal_BMI_boys_0_3y	Romano et al., 2022; Zhang, Pan, et al., 2022; Jensen et al., 2020	NONE	-0.00693123	-0.0285864	0.0147239	0	0.0364705	-0.0672762	0.140217
PFDA_prenatal_BMI_boys_0_3y	Zhang, Pan, et al., 2022; Jensen et al., 2020	Romano et al., 2022	-0.00821406	-0.0425214	0.0260933	0	0.0748667	-0.113692	0.263425
PFDA_prenatal_BMI_boys_0_3y	Romano et al., 2022; Jensen et al., 2020	Zhang, Pan, et al., 2022	-0.0054604	-0.0333452	0.0224244	0	0.130559	-0.177863	0.438981
PFDA_prenatal_BMI_boys_0_3y	Romano et al., 2022; Zhang, Pan, et al., 2022	Jensen et al., 2020	-0.00730773	-0.0289794	0.0143639	0	-0.00827298	-0.0339964	0.0174504
PFDA_prenatal_BMI_boys_4_18y	Zhang, Lei, et al., 2022; Bloom et al., 2022; Chen et al., 2019	NONE	0.0016239	-0.00380048	0.00704828	0	-0.0110819	-0.385192	0.363028
PFDA_prenatal_BMI_boys_4_18y	Bloom et al., 2022; Chen et al., 2019	Zhang, Lei, et al., 2022	0.00168354	-0.00375331	0.00712039	0	-0.00981225	-0.414275	0.394651
PFDA_prenatal_BMI_boys_4_18y	Zhang, Lei, et al., 2022; Chen et al., 2019	Bloom et al., 2022	0.00162506	-0.00379947	0.00704959	0	-0.00376461	-0.0374665	0.0299373
PFDA_prenatal_BMI_boys_4_18y	Zhang, Lei, et al., 2022; Bloom et al., 2022	Chen et al., 2019	-0.0114183	-0.0910454	0.0682089	0	-0.0161034	-0.477941	0.445734
PFDA_prenatal_BMI_girls_0_3y	Romano et al., 2022; Zhang, Pan, et al., 2022; Jensen et al., 2020	NONE	0.0110703	-0.0205341	0.0426748	0.405945	0.105457	-0.0437152	0.254629
PFDA_prenatal_BMI_girls_0_3y	Zhang, Pan, et al., 2022; Jensen et al., 2020	Romano et al., 2022	0.209973	-0.324289	0.744235	0.701913	0.195713	-0.339292	0.730717
PFDA_prenatal_BMI_girls_0_3y	Romano et al., 2022; Jensen et al., 2020	Zhang, Pan, et al., 2022	0.221009	-0.304512	0.74653	0.664416	0.317882	-0.240897	0.876661
PFDA_prenatal_BMI_girls_0_3y	Romano et al., 2022; Zhang, Pan, et al., 2022	Jensen et al., 2020	0.00953714	-0.0220263	0.0411006	0	0.0126381	-0.0448076	0.0700838
PFDA_prenatal_BMI_girls_4_18y	Zhang, Lei, et al., 2022; Bloom et al., 2022; Chen et al., 2019	NONE	-0.00172396	-0.00771451	0.00426659	0	-0.162783	-0.472943	0.147377
PFDA_prenatal_BMI_girls_4_18y	Bloom et al., 2022; Chen et al., 2019	Zhang, Lei, et al., 2022	-0.00950079	-0.101854	0.0828528	0.0469297	-0.176652	-0.517037	0.163732
PFDA_prenatal_BMI_girls_4_18y	Zhang, Lei, et al., 2022; Chen et al., 2019	Bloom et al., 2022	-0.0019645	-0.00593032	0.00200131	0	0.00168225	-0.00915912	0.0125236
PFDA_prenatal_BMI_girls_4_18y	Zhang, Lei, et al., 2022; Bloom et al., 2022	Chen et al., 2019	-0.00940976	-0.148456	0.129637	0.100124	-0.199066	-0.595947	0.197814
PFUA_prenatal_BMI_both_sexes_4_18y	Zhang, Lei, et al., 2022; Bloom et al., 2022; Chen et al., 2019; Vrijheid et al., 2020	NONE	-0.00154547	-0.00479466	0.00170372	0	-0.393134	-1.24117	0.454904
PFUA_prenatal_BMI_both_sexes_4_18y	Bloom et al., 2022; Chen et al., 2019; Vrijheid et al., 2020	Zhang, Lei, et al., 2022	-0.00157692	-0.00483428	0.00168043	0	-0.334793	-1.08613	0.416544
PFUA_prenatal_BMI_both_sexes_4_18y	Zhang, Lei, et al., 2022; Chen et al., 2019; Vrijheid et al., 2020	Bloom et al., 2022	-0.00154791	-0.00479715	0.00170132	0	-0.420414	-1.26231	0.421482
PFUA_prenatal_BMI_both_sexes_4_18y	Zhang, Lei, et al., 2022; Bloom et al., 2022; Vrijheid et al., 2020	Chen et al., 2019	0.0045161	-0.0412587	0.0502909	0	-0.358763	-1.16686	0.449337
PFUA_prenatal_BMI_both_sexes_4_18y	Zhang, Lei, et al., 2022; Bloom et al., 2022; Chen et al., 2019	Vrijheid et al., 2020	-0.00154227	-0.00479146	0.00170693	0	0.0388804	-0.229339	0.307099
PFUA_prenatal_BMI_boys_4_18y	Zhang, Lei, et al., 2022; Bloom et al., 2022; Chen et al., 2019	NONE	0.00212283	-0.00551049	0.00975615	0	0.282674	-0.275536	0.840884
PFUA_prenatal_BMI_boys_4_18y	Bloom et al., 2022; Chen et al., 2019	Zhang, Lei, et al., 2022	0.00201819	-0.00563937	0.00967575	0	0.302684	-0.300948	0.906316
PFUA_prenatal_BMI_boys_4_18y	Zhang, Lei, et al., 2022; Chen et al., 2019	Bloom et al., 2022	0.00209584	-0.00553767	0.00972935	0	0.00893544	-0.0315187	0.0493896
PFUA_prenatal_BMI_boys_4_18y	Zhang, Lei, et al., 2022; Bloom et al., 2022	Chen et al., 2019	0.022679	-0.0729496	0.118308	0	0.350646	-0.338137	1.03943
PFUA_prenatal_BMI_girls_4_18y	Zhang, Lei, et al., 2022; Bloom et al., 2022; Chen et al., 2019	NONE	-0.00450603	-0.00982536	0.000813309	0	-0.0501473	-0.470399	0.370105
PFUA_prenatal_BMI_girls_4_18y	Bloom et al., 2022; Chen et al., 2019	Zhang, Lei, et al., 2022	-0.00426227	-0.00965618	0.00113165	0	-0.0521258	-0.504438	0.400187
PFUA_prenatal_BMI_girls_4_18y	Zhang, Lei, et al., 2022; Chen et al., 2019	Bloom et al., 2022	-0.00450232	-0.00982178	0.000817128	0	-0.00793688	-0.0216033	0.00572953
PFUA_prenatal_BMI_girls_4_18y	Zhang, Lei, et al., 2022; Bloom et al., 2022	Chen et al., 2019	-0.0132599	-0.0453342	0.0188143	0	-0.062353	-0.581529	0.456823
PFOA_prenatal_risk_both_sexes_4_18y	Bloom et al., 2022; Martinsson et al., 2020; Lauritzen et al., 2018; Mora et al., 2017; Braun et al., 2016; Karlsen et al., 2017; Manzano-Salgado et al., 2017; Hoyer et al., 2015 - Greenland; Hoyer et al., 2015 - Ukraine	NONE	0.00841743	-0.00031358	0.0171484	0.0239867	0.0141879	-0.000559002	0.0289347
PFOA_prenatal_risk_both_sexes_4_18y	Martinsson et al., 2020; Lauritzen et al., 2018; Mora et al., 2017; Braun et al., 2016; Karlsen et al., 2017; Manzano-Salgado et al., 2017; Hoyer et al., 2015 - Greenland; Hoyer et al., 2015 - Ukraine	Bloom et al., 2022	0.012099	0.00109236	0.0231057	0.00316823	0.0183826	0.00197858	0.0347867
PFOA_prenatal_risk_both_sexes_4_18y	Bloom et al., 2022; Lauritzen et al., 2018; Mora et al., 2017; Braun et al., 2016; Karlsen et al., 2017; Manzano-Salgado et al., 2017; Hoyer et al., 2015 - Greenland; Hoyer et al., 2015 - Ukraine	Martinsson et al., 2020	0.00817515	-0.00067107	0.0170214	0.135894	0.016516	0.00147828	0.0315537
PFOA_prenatal_risk_both_sexes_4_18y	Bloom et al., 2022; Martinsson et al., 2020; Mora et al., 2017; Braun et al., 2016; Karlsen et al., 2017; Manzano-Salgado et al., 2017; Hoyer et al., 2015 - Greenland; Hoyer et al., 2015 - Ukraine	Lauritzen et al., 2018	0.00716586	-0.00151991	0.0158516	0	0.00990001	-0.00450499	0.024305
PFOA_prenatal_risk_both_sexes_4_18y	Bloom et al., 2022; Martinsson et al., 2020; Lauritzen et al., 2018; Braun et al., 2016; Karlsen et al., 2017; Manzano-Salgado et al., 2017; Hoyer et al., 2015 - Greenland; Hoyer et al., 2015 - Ukraine	Mora et al., 2017	0.0110368	0.000254303	0.0218194	0.0888108	0.0187956	0.00192678	0.0356644
PFOA_prenatal_risk_both_sexes_4_18y	Bloom et al., 2022; Martinsson et al., 2020; Lauritzen et al., 2018; Mora et al., 2017; Karlsen et al., 2017; Manzano-Salgado et al., 2017; Hoyer et al., 2015 - Greenland; Hoyer et al., 2015 - Ukraine	Braun et al., 2016	0.00683867	-0.0024762	0.0161535	0.0675615	0.016438	0.000698772	0.0321773
PFOA_prenatal_risk_both_sexes_4_18y	Bloom et al., 2022; Martinsson et al., 2020; Lauritzen et al., 2018; Mora et al., 2017; Braun et al., 2016; Manzano-Salgado et al., 2017; Hoyer et al., 2015 - Greenland; Hoyer et al., 2015 - Ukraine	Karlsen et al., 2017	0.0067861	-0.00241241	0.0159846	0	0.0152228	-0.000433675	0.0308794
PFOA_prenatal_risk_both_sexes_4_18y	Bloom et al., 2022; Martinsson et al., 2020; Lauritzen et al., 2018; Mora et al., 2017; Braun et al., 2016; Karlsen et al., 2017; Hoyer et al., 2015 - Greenland; Hoyer et al., 2015 - Ukraine	Manzano-Salgado et al., 2017	0.0102509	1.13943e-05	0.0204903	0.112075	0.0190748	0.00208368	0.036066
PFOA_prenatal_risk_both_sexes_4_18y	Bloom et al., 2022; Martinsson et al., 2020; Lauritzen et al., 2018; Mora et al., 2017; Braun et al., 2016; Karlsen et al., 2017; Manzano-Salgado et al., 2017; Hoyer et al., 2015 - Ukraine	Hoyer et al., 2015 - Greenland	0.00819208	-0.000693829	0.017078	0.136334	0.0165733	0.000893722	0.0322528
PFOA_prenatal_risk_both_sexes_4_18y	Bloom et al., 2022; Martinsson et al., 2020; Lauritzen et al., 2018; Mora et al., 2017; Braun et al., 2016; Karlsen et al., 2017; Manzano-Salgado et al., 2017; Hoyer et al., 2015 - Greenland	Hoyer et al., 2015 - Ukraine	0.00854319	-0.000319444	0.0174058	0.144592	0.0178854	0.00332621	0.0324446
PFOS_prenatal_risk_both_sexes_4_18y	Bloom et al., 2022; Martinsson et al., 2020; Lauritzen et al., 2018; Mora et al., 2017; Braun et al., 2016; Karlsen et al., 2017; Manzano-Salgado et al., 2017; Hoyer et al., 2015 - Greenland; Hoyer et al., 2015 - Ukraine	NONE	0.000709039	-0.00115453	0.00257261	0.190737	0.00157507	-0.00180495	0.00495509
PFOS_prenatal_risk_both_sexes_4_18y	Martinsson et al., 2020; Lauritzen et al., 2018; Mora et al., 2017; Braun et al., 2016; Karlsen et al., 2017; Manzano-Salgado et al., 2017; Hoyer et al., 2015 - Greenland; Hoyer et al., 2015 - Ukraine	Bloom et al., 2022	0.0011604	-0.00128901	0.00360982	0.16664	0.00209105	-0.00182808	0.00601017
PFOS_prenatal_risk_both_sexes_4_18y	Bloom et al., 2022; Lauritzen et al., 2018; Mora et al., 2017; Braun et al., 2016; Karlsen et al., 2017; Manzano-Salgado et al., 2017; Hoyer et al., 2015 - Greenland; Hoyer et al., 2015 - Ukraine	Martinsson et al., 2020	-0.000178009	-0.00167862	0.00132261	0	0.00139553	-0.00253656	0.00532762
PFOS_prenatal_risk_both_sexes_4_18y	Bloom et al., 2022; Martinsson et al., 2020; Mora et al., 2017; Braun et al., 2016; Karlsen et al., 2017; Manzano-Salgado et al., 2017; Hoyer et al., 2015 - Greenland; Hoyer et al., 2015 - Ukraine	Lauritzen et al., 2018	0.000597455	-0.00126287	0.00245778	0.17886	0.000808693	-0.00251231	0.0041297
PFOS_prenatal_risk_both_sexes_4_18y	Bloom et al., 2022; Martinsson et al., 2020; Lauritzen et al., 2018; Braun et al., 2016; Karlsen et al., 2017; Manzano-Salgado et al., 2017; Hoyer et al., 2015 - Greenland; Hoyer et al., 2015 - Ukraine	Mora et al., 2017	0.000355557	-0.00162416	0.00233527	0.174251	0.0016068	-0.00232757	0.00554118
PFOS_prenatal_risk_both_sexes_4_18y	Bloom et al., 2022; Martinsson et al., 2020; Lauritzen et al., 2018; Mora et al., 2017; Karlsen et al., 2017; Manzano-Salgado et al., 2017; Hoyer et al., 2015 - Greenland; Hoyer et al., 2015 - Ukraine	Braun et al., 2016	0.00110611	-0.001312	0.00352422	0.228667	0.00194861	-0.00178948	0.00568669
PFOS_prenatal_risk_both_sexes_4_18y	Bloom et al., 2022; Martinsson et al., 2020; Lauritzen et al., 2018; Mora et al., 2017; Braun et al., 2016; Manzano-Salgado et al., 2017; Hoyer et al., 2015 - Greenland; Hoyer et al., 2015 - Ukraine	Karlsen et al., 2017	0.000741772	-0.00119375	0.00267729	0.291276	0.00193237	-0.00182438	0.00568911
PFOS_prenatal_risk_both_sexes_4_18y	Bloom et al., 2022; Martinsson et al., 2020; Lauritzen et al., 2018; Mora et al., 2017; Braun et al., 2016; Karlsen et al., 2017; Hoyer et al., 2015 - Greenland; Hoyer et al., 2015 - Ukraine	Manzano-Salgado et al., 2017	0.000828278	-0.00108485	0.00274141	0.255221	0.00268091	-0.000910049	0.00627187
PFOS_prenatal_risk_both_sexes_4_18y	Bloom et al., 2022; Martinsson et al., 2020; Lauritzen et al., 2018; Mora et al., 2017; Braun et al., 2016; Karlsen et al., 2017; Manzano-Salgado et al., 2017; Hoyer et al., 2015 - Ukraine	Hoyer et al., 2015 - Greenland	0.00106871	-0.00105579	0.00319321	0.218662	0.00215977	-0.00168708	0.00600662
PFOS_prenatal_risk_both_sexes_4_18y	Bloom et al., 2022; Martinsson et al., 2020; Lauritzen et al., 2018; Mora et al., 2017; Braun et al., 2016; Karlsen et al., 2017; Manzano-Salgado et al., 2017; Hoyer et al., 2015 - Greenland	Hoyer et al., 2015 - Ukraine	0.000676121	-0.00120429	0.00255654	0.278127	0.00138938	-0.00167839	0.00445715
PFHxS_prenatal_risk_both_sexes_4_18y	Bloom et al., 2022; Martinsson et al., 2020; Mora et al., 2017; Braun et al., 2016; Karlsen et al., 2017; Manzano-Salgado et al., 2017	NONE	-0.0034688	-0.023545	0.0166074	0.413714	-0.0626762	-0.120149	-0.00520341
PFHxS_prenatal_risk_both_sexes_4_18y	Martinsson et al., 2020; Mora et al., 2017; Braun et al., 2016; Karlsen et al., 2017; Manzano-Salgado et al., 2017	Bloom et al., 2022	0.00292598	-0.0139962	0.0198481	0.438861	-0.0563697	-0.117767	0.00502716
PFHxS_prenatal_risk_both_sexes_4_18y	Bloom et al., 2022; Mora et al., 2017; Braun et al., 2016; Karlsen et al., 2017; Manzano-Salgado et al., 2017	Martinsson et al., 2020	-0.000348422	-0.0179453	0.0172485	0	-0.00427282	-0.0283917	0.0198461
PFHxS_prenatal_risk_both_sexes_4_18y	Bloom et al., 2022; Martinsson et al., 2020; Braun et al., 2016; Karlsen et al., 2017; Manzano-Salgado et al., 2017	Mora et al., 2017	-0.0161228	-0.0445783	0.0123327	0.419776	-0.06439	-0.129079	0.000299051
PFHxS_prenatal_risk_both_sexes_4_18y	Bloom et al., 2022; Martinsson et al., 2020; Mora et al., 2017; Karlsen et al., 2017; Manzano-Salgado et al., 2017	Braun et al., 2016	-0.00847107	-0.032611	0.0156689	0.481108	-0.0595721	-0.115508	-0.00363618
PFHxS_prenatal_risk_both_sexes_4_18y	Bloom et al., 2022; Martinsson et al., 2020; Mora et al., 2017; Braun et al., 2016; Manzano-Salgado et al., 2017	Karlsen et al., 2017	-0.00675526	-0.0302296	0.0167191	0.512376	-0.0617	-0.119119	-0.00428135
PFHxS_prenatal_risk_both_sexes_4_18y	Bloom et al., 2022; Martinsson et al., 2020; Mora et al., 2017; Braun et al., 2016; Karlsen et al., 2017	Manzano-Salgado et al., 2017	0.00148343	-0.0159892	0.0189561	0.448229	-0.0564189	-0.118847	0.0060093
PFNA_prenatal_risk_both_sexes_4_18y	Bloom et al., 2022; Martinsson et al., 2020; Mora et al., 2017; Braun et al., 2016; Karlsen et al., 2017; Manzano-Salgado et al., 2017	NONE	0.0250015	-0.0116055	0.0616086	0.0227201	-0.0633398	-0.161085	0.0344056
PFNA_prenatal_risk_both_sexes_4_18y	Martinsson et al., 2020; Mora et al., 2017; Braun et al., 2016; Karlsen et al., 2017; Manzano-Salgado et al., 2017	Bloom et al., 2022	0.020106	-0.0238581	0.0640701	0.193404	-0.0637643	-0.170985	0.0434561
PFNA_prenatal_risk_both_sexes_4_18y	Bloom et al., 2022; Mora et al., 2017; Braun et al., 2016; Karlsen et al., 2017; Manzano-Salgado et al., 2017	Martinsson et al., 2020	0.0292282	-0.00756681	0.0660232	0	0.0384	-0.0191801	0.0959802
PFNA_prenatal_risk_both_sexes_4_18y	Bloom et al., 2022; Martinsson et al., 2020; Braun et al., 2016; Karlsen et al., 2017; Manzano-Salgado et al., 2017	Mora et al., 2017	0.0240534	-0.0133949	0.0615016	0.209614	-0.0688859	-0.171082	0.0333101
PFNA_prenatal_risk_both_sexes_4_18y	Bloom et al., 2022; Martinsson et al., 2020; Mora et al., 2017; Karlsen et al., 2017; Manzano-Salgado et al., 2017	Braun et al., 2016	0.0238998	-0.0130901	0.0608897	0.190882	-0.0599626	-0.154468	0.0345428
PFNA_prenatal_risk_both_sexes_4_18y	Bloom et al., 2022; Martinsson et al., 2020; Mora et al., 2017; Braun et al., 2016; Manzano-Salgado et al., 2017	Karlsen et al., 2017	0.0283168	-0.0151258	0.0717595	0.206117	-0.0561297	-0.158916	0.0466564
PFNA_prenatal_risk_both_sexes_4_18y	Bloom et al., 2022; Martinsson et al., 2020; Mora et al., 2017; Braun et al., 2016; Karlsen et al., 2017	Manzano-Salgado et al., 2017	0.0232622	-0.0215823	0.0681066	0.21552	-0.0675321	-0.180797	0.0457328
PFOA_prenatal_WC_both_sexes_4_18y	Papadopoulou et al., 2021; Zhang, Lei, et al., 2022; Bloom et al., 2022; Liu et al., 2020; Mora et al., 2017; Chen et al., 2019; Manzano-Salgado et al., 2017	NONE	-1.80742e-05	-8.23014e-05	4.6153e-05	0	0.000651011	-0.0170893	0.0183913
PFOA_prenatal_WC_both_sexes_4_18y	Zhang, Lei, et al., 2022; Bloom et al., 2022; Liu et al., 2020; Mora et al., 2017; Chen et al., 2019; Manzano-Salgado et al., 2017	Papadopoulou et al., 2021	-1.80851e-05	-8.23123e-05	4.61422e-05	0	-0.00109238	-0.0122286	0.0100438
PFOA_prenatal_WC_both_sexes_4_18y	Papadopoulou et al., 2021; Bloom et al., 2022; Liu et al., 2020; Mora et al., 2017; Chen et al., 2019; Manzano-Salgado et al., 2017	Zhang, Lei, et al., 2022	-4.06497e-06	-7.99097e-05	7.17798e-05	0	0.000912804	-0.0148126	0.0166382
PFOA_prenatal_WC_both_sexes_4_18y	Papadopoulou et al., 2021; Zhang, Lei, et al., 2022; Liu et al., 2020; Mora et al., 2017; Chen et al., 2019; Manzano-Salgado et al., 2017	Bloom et al., 2022	-1.81437e-05	-8.23713e-05	4.60838e-05	0	-7.5434e-05	-0.0166995	0.0165486
PFOA_prenatal_WC_both_sexes_4_18y	Papadopoulou et al., 2021; Zhang, Lei, et al., 2022; Bloom et al., 2022; Mora et al., 2017; Chen et al., 2019; Manzano-Salgado et al., 2017	Liu et al., 2020	-1.87789e-05	-8.3015e-05	4.54573e-05	0	0.000673191	-0.015069	0.0164154
PFOA_prenatal_WC_both_sexes_4_18y	Papadopoulou et al., 2021; Zhang, Lei, et al., 2022; Bloom et al., 2022; Liu et al., 2020; Chen et al., 2019; Manzano-Salgado et al., 2017	Mora et al., 2017	-2.78793e-05	-9.45988e-05	3.88402e-05	0	0.000982713	-0.0164393	0.0184048
PFOA_prenatal_WC_both_sexes_4_18y	Papadopoulou et al., 2021; Zhang, Lei, et al., 2022; Bloom et al., 2022; Liu et al., 2020; Mora et al., 2017; Manzano-Salgado et al., 2017	Chen et al., 2019	-1.99505e-06	-0.000160579	0.000156589	0	0.000944108	-0.0153827	0.0172709
PFOA_prenatal_WC_both_sexes_4_18y	Papadopoulou et al., 2021; Zhang, Lei, et al., 2022; Bloom et al., 2022; Liu et al., 2020; Mora et al., 2017; Chen et al., 2019	Manzano-Salgado et al., 2017	-1.80522e-05	-8.22795e-05	4.61751e-05	0	0.0035099	-0.0109011	0.0179209
PFOA_prenatal_WC_boys_4_18y	Zhang, Lei, et al., 2022; Bloom et al., 2022; Liu et al., 2020; Andersen et al., 2013; Mora et al., 2017; Chen et al., 2019; Manzano-Salgado et al., 2017	NONE	-6.02708e-05	-0.000236326	0.000115784	0	-0.00226742	-0.0218211	0.0172863
PFOA_prenatal_WC_boys_4_18y	Bloom et al., 2022; Liu et al., 2020; Andersen et al., 2013; Mora et al., 2017; Chen et al., 2019; Manzano-Salgado et al., 2017	Zhang, Lei, et al., 2022	-2.04294e-06	-5.40117e-05	4.99258e-05	0	-0.00244159	-0.0199673	0.0150841
PFOA_prenatal_WC_boys_4_18y	Zhang, Lei, et al., 2022; Liu et al., 2020; Andersen et al., 2013; Mora et al., 2017; Chen et al., 2019; Manzano-Salgado et al., 2017	Bloom et al., 2022	-6.04755e-05	-0.000236785	0.000115833	0	-0.00303676	-0.0212177	0.0151442
PFOA_prenatal_WC_boys_4_18y	Zhang, Lei, et al., 2022; Bloom et al., 2022; Andersen et al., 2013; Mora et al., 2017; Chen et al., 2019; Manzano-Salgado et al., 2017	Liu et al., 2020	-6.20158e-05	-0.000240773	0.000116742	0	-0.00246543	-0.019892	0.0149612
PFOA_prenatal_WC_boys_4_18y	Zhang, Lei, et al., 2022; Bloom et al., 2022; Liu et al., 2020; Mora et al., 2017; Chen et al., 2019; Manzano-Salgado et al., 2017	Andersen et al., 2013	-5.94075e-05	-0.000234421	0.000115606	0	0.00156359	-0.0154548	0.018582
PFOA_prenatal_WC_boys_4_18y	Zhang, Lei, et al., 2022; Bloom et al., 2022; Liu et al., 2020; Andersen et al., 2013; Chen et al., 2019; Manzano-Salgado et al., 2017	Mora et al., 2017	-6.37181e-05	-0.000293441	0.000166005	0	-0.00271597	-0.022221	0.0167891
PFOA_prenatal_WC_boys_4_18y	Zhang, Lei, et al., 2022; Bloom et al., 2022; Liu et al., 2020; Andersen et al., 2013; Mora et al., 2017; Manzano-Salgado et al., 2017	Chen et al., 2019	-0.00021848	-0.000521537	8.45764e-05	0	-0.0025653	-0.0207748	0.0156442
PFOA_prenatal_WC_boys_4_18y	Zhang, Lei, et al., 2022; Bloom et al., 2022; Liu et al., 2020; Andersen et al., 2013; Mora et al., 2017; Chen et al., 2019	Manzano-Salgado et al., 2017	-6.03647e-05	-0.000236534	0.000115805	0	-0.00409968	-0.0149624	0.00676301
PFOA_prenatal_WC_girls_4_18y	Zhang, Lei, et al., 2022; Bloom et al., 2022; Hartman et al., 2017; Liu et al., 2020; Andersen et al., 2013; Mora et al., 2017; Chen et al., 2019; Manzano-Salgado et al., 2017	NONE	-8.51318e-06	-7.76716e-05	6.06452e-05	0.432198	-0.00403123	-0.0194284	0.011366
PFOA_prenatal_WC_girls_4_18y	Bloom et al., 2022; Hartman et al., 2017; Liu et al., 2020; Andersen et al., 2013; Mora et al., 2017; Chen et al., 2019; Manzano-Salgado et al., 2017	Zhang, Lei, et al., 2022	7.34077e-06	-0.000256618	0.0002713	0.509758	-0.00282793	-0.0163797	0.0107238
PFOA_prenatal_WC_girls_4_18y	Zhang, Lei, et al., 2022; Hartman et al., 2017; Liu et al., 2020; Andersen et al., 2013; Mora et al., 2017; Chen et al., 2019; Manzano-Salgado et al., 2017	Bloom et al., 2022	-8.59058e-06	-7.77493e-05	6.05681e-05	0.487729	-0.00454722	-0.0185176	0.00942312
PFOA_prenatal_WC_girls_4_18y	Zhang, Lei, et al., 2022; Bloom et al., 2022; Liu et al., 2020; Andersen et al., 2013; Mora et al., 2017; Chen et al., 2019; Manzano-Salgado et al., 2017	Hartman et al., 2017	-5.50992e-06	-7.47099e-05	6.36901e-05	0.0482008	-0.00263728	-0.0171142	0.0118396
PFOA_prenatal_WC_girls_4_18y	Zhang, Lei, et al., 2022; Bloom et al., 2022; Hartman et al., 2017; Andersen et al., 2013; Mora et al., 2017; Chen et al., 2019; Manzano-Salgado et al., 2017	Liu et al., 2020	-9.01253e-06	-7.81744e-05	6.01494e-05	0.419705	-0.00328223	-0.0169151	0.0103507
PFOA_prenatal_WC_girls_4_18y	Zhang, Lei, et al., 2022; Bloom et al., 2022; Hartman et al., 2017; Liu et al., 2020; Mora et al., 2017; Chen et al., 2019; Manzano-Salgado et al., 2017	Andersen et al., 2013	-8.52096e-06	-7.76795e-05	6.06375e-05	0.512569	-0.0035969	-0.0162884	0.00909456
PFOA_prenatal_WC_girls_4_18y	Zhang, Lei, et al., 2022; Bloom et al., 2022; Hartman et al., 2017; Liu et al., 2020; Andersen et al., 2013; Chen et al., 2019; Manzano-Salgado et al., 2017	Mora et al., 2017	-2.50095e-05	-9.69901e-05	4.69712e-05	0.381691	-0.00312772	-0.0179446	0.0116892
PFOA_prenatal_WC_girls_4_18y	Zhang, Lei, et al., 2022; Bloom et al., 2022; Hartman et al., 2017; Liu et al., 2020; Andersen et al., 2013; Mora et al., 2017; Manzano-Salgado et al., 2017	Chen et al., 2019	3.19027e-05	-0.000138709	0.000202515	0.48885	-0.002916	-0.0169307	0.0110987
PFOA_prenatal_WC_girls_4_18y	Zhang, Lei, et al., 2022; Bloom et al., 2022; Hartman et al., 2017; Liu et al., 2020; Andersen et al., 2013; Mora et al., 2017; Chen et al., 2019	Manzano-Salgado et al., 2017	-8.47822e-06	-7.76367e-05	6.06802e-05	0.482872	0.00223425	-0.00647132	0.0109398
PFOS_prenatal_WC_both_sexes_4_18y	Papadopoulou et al., 2021; Zhang, Lei, et al., 2022; Bloom et al., 2022; Liu et al., 2020; Mora et al., 2017; Chen et al., 2019; Manzano-Salgado et al., 2017	NONE	3.94581e-05	-9.15943e-06	8.80756e-05	0	-0.00379169	-0.011473	0.00388962
PFOS_prenatal_WC_both_sexes_4_18y	Zhang, Lei, et al., 2022; Bloom et al., 2022; Liu et al., 2020; Mora et al., 2017; Chen et al., 2019; Manzano-Salgado et al., 2017	Papadopoulou et al., 2021	3.95193e-05	-9.09835e-06	8.81369e-05	0	-9.18609e-05	-0.00509467	0.00491095
PFOS_prenatal_WC_both_sexes_4_18y	Papadopoulou et al., 2021; Bloom et al., 2022; Liu et al., 2020; Mora et al., 2017; Chen et al., 2019; Manzano-Salgado et al., 2017	Zhang, Lei, et al., 2022	3.90803e-05	-9.55598e-06	8.77167e-05	0	-0.00334237	-0.0101096	0.00342489
PFOS_prenatal_WC_both_sexes_4_18y	Papadopoulou et al., 2021; Zhang, Lei, et al., 2022; Liu et al., 2020; Mora et al., 2017; Chen et al., 2019; Manzano-Salgado et al., 2017	Bloom et al., 2022	3.98681e-05	-8.75595e-06	8.84922e-05	0	-0.00328894	-0.0105687	0.00399081
PFOS_prenatal_WC_both_sexes_4_18y	Papadopoulou et al., 2021; Zhang, Lei, et al., 2022; Bloom et al., 2022; Mora et al., 2017; Chen et al., 2019; Manzano-Salgado et al., 2017	Liu et al., 2020	3.90731e-05	-9.55341e-06	8.76996e-05	0	-0.00339927	-0.0101733	0.00337479
PFOS_prenatal_WC_both_sexes_4_18y	Papadopoulou et al., 2021; Zhang, Lei, et al., 2022; Bloom et al., 2022; Liu et al., 2020; Chen et al., 2019; Manzano-Salgado et al., 2017	Mora et al., 2017	5.06773e-05	-0.000133919	0.000235273	0	-0.00365734	-0.0111569	0.00384218
PFOS_prenatal_WC_both_sexes_4_18y	Papadopoulou et al., 2021; Zhang, Lei, et al., 2022; Bloom et al., 2022; Liu et al., 2020; Mora et al., 2017; Manzano-Salgado et al., 2017	Chen et al., 2019	3.89353e-05	-1.1423e-05	8.92936e-05	0	-0.00342606	-0.0104541	0.00360196
PFOS_prenatal_WC_both_sexes_4_18y	Papadopoulou et al., 2021; Zhang, Lei, et al., 2022; Bloom et al., 2022; Liu et al., 2020; Mora et al., 2017; Chen et al., 2019	Manzano-Salgado et al., 2017	4.98175e-05	-0.000208308	0.000307943	0	-0.00373975	-0.00961627	0.00213678
PFOS_prenatal_WC_boys_4_18y	Zhang, Lei, et al., 2022; Bloom et al., 2022; Liu et al., 2020; Andersen et al., 2013; Mora et al., 2017; Chen et al., 2019; Manzano-Salgado et al., 2017	NONE	-6.02806e-06	-7.59388e-05	6.38827e-05	0	-0.00124366	-0.00933027	0.00684295
PFOS_prenatal_WC_boys_4_18y	Bloom et al., 2022; Liu et al., 2020; Andersen et al., 2013; Mora et al., 2017; Chen et al., 2019; Manzano-Salgado et al., 2017	Zhang, Lei, et al., 2022	-6.321e-06	-7.62381e-05	6.35961e-05	0	-0.00111243	-0.00807463	0.00584977
PFOS_prenatal_WC_boys_4_18y	Zhang, Lei, et al., 2022; Liu et al., 2020; Andersen et al., 2013; Mora et al., 2017; Chen et al., 2019; Manzano-Salgado et al., 2017	Bloom et al., 2022	-6.02221e-06	-7.59417e-05	6.38972e-05	0	-0.00102842	-0.0085294	0.00647257
PFOS_prenatal_WC_boys_4_18y	Zhang, Lei, et al., 2022; Bloom et al., 2022; Andersen et al., 2013; Mora et al., 2017; Chen et al., 2019; Manzano-Salgado et al., 2017	Liu et al., 2020	-7.04977e-06	-7.69987e-05	6.28991e-05	0	-0.00103561	-0.00797485	0.00590364
PFOS_prenatal_WC_boys_4_18y	Zhang, Lei, et al., 2022; Bloom et al., 2022; Liu et al., 2020; Mora et al., 2017; Chen et al., 2019; Manzano-Salgado et al., 2017	Andersen et al., 2013	-5.94169e-06	-7.58555e-05	6.39721e-05	0	-0.0008459	-0.00835123	0.00665943
PFOS_prenatal_WC_boys_4_18y	Zhang, Lei, et al., 2022; Bloom et al., 2022; Liu et al., 2020; Andersen et al., 2013; Chen et al., 2019; Manzano-Salgado et al., 2017	Mora et al., 2017	-1.66506e-05	-0.00014071	0.000107408	0	-0.00106418	-0.00883297	0.00670461
PFOS_prenatal_WC_boys_4_18y	Zhang, Lei, et al., 2022; Bloom et al., 2022; Liu et al., 2020; Andersen et al., 2013; Mora et al., 2017; Manzano-Salgado et al., 2017	Chen et al., 2019	6.54626e-07	-8.38735e-05	8.51828e-05	0	-0.000990844	-0.00824353	0.00626184
PFOS_prenatal_WC_boys_4_18y	Zhang, Lei, et al., 2022; Bloom et al., 2022; Liu et al., 2020; Andersen et al., 2013; Mora et al., 2017; Chen et al., 2019	Manzano-Salgado et al., 2017	-6.00472e-06	-7.59157e-05	6.39062e-05	0	5.41003e-05	-0.00185392	0.00196212
PFOS_prenatal_WC_girls_4_18y	Zhang, Lei, et al., 2022; Bloom et al., 2022; Hartman et al., 2017; Liu et al., 2020; Andersen et al., 2013; Mora et al., 2017; Chen et al., 2019; Manzano-Salgado et al., 2017	NONE	-6.49868e-05	-0.000403986	0.000274012	0.511598	0.00149814	-0.00532129	0.00831756
PFOS_prenatal_WC_girls_4_18y	Bloom et al., 2022; Hartman et al., 2017; Liu et al., 2020; Andersen et al., 2013; Mora et al., 2017; Chen et al., 2019; Manzano-Salgado et al., 2017	Zhang, Lei, et al., 2022	-0.000100659	-0.000476353	0.000275036	0.575001	0.00118336	-0.00457664	0.00694336
PFOS_prenatal_WC_girls_4_18y	Zhang, Lei, et al., 2022; Hartman et al., 2017; Liu et al., 2020; Andersen et al., 2013; Mora et al., 2017; Chen et al., 2019; Manzano-Salgado et al., 2017	Bloom et al., 2022	-4.5957e-05	-0.000380826	0.000288913	0.502599	0.00178992	-0.00432859	0.00790842
PFOS_prenatal_WC_girls_4_18y	Zhang, Lei, et al., 2022; Bloom et al., 2022; Liu et al., 2020; Andersen et al., 2013; Mora et al., 2017; Chen et al., 2019; Manzano-Salgado et al., 2017	Hartman et al., 2017	5.79575e-05	-1.01699e-06	0.000116932	0	0.00137429	-0.00477641	0.00752498
PFOS_prenatal_WC_girls_4_18y	Zhang, Lei, et al., 2022; Bloom et al., 2022; Hartman et al., 2017; Andersen et al., 2013; Mora et al., 2017; Chen et al., 2019; Manzano-Salgado et al., 2017	Liu et al., 2020	-8.01554e-05	-0.000425209	0.000264898	0.557312	0.00106658	-0.00472524	0.0068584
PFOS_prenatal_WC_girls_4_18y	Zhang, Lei, et al., 2022; Bloom et al., 2022; Hartman et al., 2017; Liu et al., 2020; Mora et al., 2017; Chen et al., 2019; Manzano-Salgado et al., 2017	Andersen et al., 2013	-6.33246e-05	-0.000402273	0.000275624	0.579454	0.00148459	-0.00462002	0.0075892
PFOS_prenatal_WC_girls_4_18y	Zhang, Lei, et al., 2022; Bloom et al., 2022; Hartman et al., 2017; Liu et al., 2020; Andersen et al., 2013; Chen et al., 2019; Manzano-Salgado et al., 2017	Mora et al., 2017	-0.000102614	-0.000744568	0.00053934	0.427525	0.00130849	-0.00499328	0.00761027
PFOS_prenatal_WC_girls_4_18y	Zhang, Lei, et al., 2022; Bloom et al., 2022; Hartman et al., 2017; Liu et al., 2020; Andersen et al., 2013; Mora et al., 2017; Manzano-Salgado et al., 2017	Chen et al., 2019	-0.000144893	-0.000646265	0.000356478	0.567379	0.0012223	-0.00473642	0.00718103
PFOS_prenatal_WC_girls_4_18y	Zhang, Lei, et al., 2022; Bloom et al., 2022; Hartman et al., 2017; Liu et al., 2020; Andersen et al., 2013; Mora et al., 2017; Chen et al., 2019	Manzano-Salgado et al., 2017	-6.61742e-05	-0.000405526	0.000273178	0.570574	-0.000567938	-0.00221816	0.00108228
PFHxS_prenatal_WC_both_sexes_4_18y	Papadopoulou et al., 2021; Zhang, Lei, et al., 2022; Bloom et al., 2022; Liu et al., 2020; Mora et al., 2017; Chen et al., 2019; Manzano-Salgado et al., 2017	NONE	0.000276015	-0.00141781	0.00196984	0.134794	-0.00693106	-0.041991	0.0281289
PFHxS_prenatal_WC_both_sexes_4_18y	Zhang, Lei, et al., 2022; Bloom et al., 2022; Liu et al., 2020; Mora et al., 2017; Chen et al., 2019; Manzano-Salgado et al., 2017	Papadopoulou et al., 2021	0.00044187	-0.00268669	0.00357043	0.2058	-0.0138844	-0.0430177	0.0152489
PFHxS_prenatal_WC_both_sexes_4_18y	Papadopoulou et al., 2021; Bloom et al., 2022; Liu et al., 2020; Mora et al., 2017; Chen et al., 2019; Manzano-Salgado et al., 2017	Zhang, Lei, et al., 2022	0.00010827	-0.000401623	0.000618164	0.184332	-0.0054022	-0.0370153	0.0262109
PFHxS_prenatal_WC_both_sexes_4_18y	Papadopoulou et al., 2021; Zhang, Lei, et al., 2022; Liu et al., 2020; Mora et al., 2017; Chen et al., 2019; Manzano-Salgado et al., 2017	Bloom et al., 2022	0.000346992	-0.00154825	0.00224224	0.0730332	0.000776259	-0.0321262	0.0336787
PFHxS_prenatal_WC_both_sexes_4_18y	Papadopoulou et al., 2021; Zhang, Lei, et al., 2022; Bloom et al., 2022; Mora et al., 2017; Chen et al., 2019; Manzano-Salgado et al., 2017	Liu et al., 2020	0.000375913	-0.00358298	0.00433481	0	-0.00869134	-0.0400376	0.0226549
PFHxS_prenatal_WC_both_sexes_4_18y	Papadopoulou et al., 2021; Zhang, Lei, et al., 2022; Bloom et al., 2022; Liu et al., 2020; Chen et al., 2019; Manzano-Salgado et al., 2017	Mora et al., 2017	0.000509973	-0.00170596	0.00272591	0.25971	-0.00511522	-0.040794	0.0305636
PFHxS_prenatal_WC_both_sexes_4_18y	Papadopoulou et al., 2021; Zhang, Lei, et al., 2022; Bloom et al., 2022; Liu et al., 2020; Mora et al., 2017; Manzano-Salgado et al., 2017	Chen et al., 2019	0.000370245	-0.00279835	0.00353884	0.267575	-0.00482711	-0.0383549	0.0287007
PFHxS_prenatal_WC_both_sexes_4_18y	Papadopoulou et al., 2021; Zhang, Lei, et al., 2022; Bloom et al., 2022; Liu et al., 2020; Mora et al., 2017; Chen et al., 2019	Manzano-Salgado et al., 2017	0.000242	-0.00113049	0.00161449	0.162666	0.00820758	-0.0156748	0.0320899
PFHxS_prenatal_WC_boys_4_18y	Zhang, Lei, et al., 2022; Bloom et al., 2022; Liu et al., 2020; Mora et al., 2017; Chen et al., 2019; Manzano-Salgado et al., 2017	NONE	-0.000116055	-0.00408843	0.00385632	0.191639	-0.0518463	-0.106879	0.00318664
PFHxS_prenatal_WC_boys_4_18y	Bloom et al., 2022; Liu et al., 2020; Mora et al., 2017; Chen et al., 2019; Manzano-Salgado et al., 2017	Zhang, Lei, et al., 2022	-0.000200299	-0.0040486	0.003648	0.313598	-0.0447527	-0.0930743	0.00356897
PFHxS_prenatal_WC_boys_4_18y	Zhang, Lei, et al., 2022; Liu et al., 2020; Mora et al., 2017; Chen et al., 2019; Manzano-Salgado et al., 2017	Bloom et al., 2022	-0.000198286	-0.00201997	0.0016234	0.277137	-0.039426	-0.0900517	0.0111996
PFHxS_prenatal_WC_boys_4_18y	Zhang, Lei, et al., 2022; Bloom et al., 2022; Mora et al., 2017; Chen et al., 2019; Manzano-Salgado et al., 2017	Liu et al., 2020	-0.000307851	-0.00342177	0.00280607	0.09498	-0.0458284	-0.0940516	0.00239483
PFHxS_prenatal_WC_boys_4_18y	Zhang, Lei, et al., 2022; Bloom et al., 2022; Liu et al., 2020; Chen et al., 2019; Manzano-Salgado et al., 2017	Mora et al., 2017	-0.000304317	-0.00350386	0.00289522	0.334876	-0.0486509	-0.10652	0.00921777
PFHxS_prenatal_WC_boys_4_18y	Zhang, Lei, et al., 2022; Bloom et al., 2022; Liu et al., 2020; Mora et al., 2017; Manzano-Salgado et al., 2017	Chen et al., 2019	-3.01531e-05	-0.00319796	0.00313765	0.332762	-0.0446092	-0.0980457	0.00882735
PFHxS_prenatal_WC_boys_4_18y	Zhang, Lei, et al., 2022; Bloom et al., 2022; Liu et al., 2020; Mora et al., 2017; Chen et al., 2019	Manzano-Salgado et al., 2017	-0.000146204	-0.000530279	0.00023787	0	-0.00148221	-0.0234436	0.0204792
PFHxS_prenatal_WC_girls_4_18y	Zhang, Lei, et al., 2022; Bloom et al., 2022; Hartman et al., 2017; Liu et al., 2020; Mora et al., 2017; Chen et al., 2019; Manzano-Salgado et al., 2017	NONE	1.31343e-05	-0.000439475	0.000465743	0.0614024	0.0143816	-0.0284682	0.0572315
PFHxS_prenatal_WC_girls_4_18y	Bloom et al., 2022; Hartman et al., 2017; Liu et al., 2020; Mora et al., 2017; Chen et al., 2019; Manzano-Salgado et al., 2017	Zhang, Lei, et al., 2022	1.96415e-05	-0.00042877	0.000468053	0.18068	0.0139703	-0.0230487	0.0509894
PFHxS_prenatal_WC_girls_4_18y	Zhang, Lei, et al., 2022; Hartman et al., 2017; Liu et al., 2020; Mora et al., 2017; Chen et al., 2019; Manzano-Salgado et al., 2017	Bloom et al., 2022	1.4216e-05	-0.000437559	0.000465991	0.170225	0.0188661	-0.019059	0.0567911
PFHxS_prenatal_WC_girls_4_18y	Zhang, Lei, et al., 2022; Bloom et al., 2022; Liu et al., 2020; Mora et al., 2017; Chen et al., 2019; Manzano-Salgado et al., 2017	Hartman et al., 2017	0.000159298	-8.92341e-05	0.00040783	0	0.0149247	-0.0251603	0.0550097
PFHxS_prenatal_WC_girls_4_18y	Zhang, Lei, et al., 2022; Bloom et al., 2022; Hartman et al., 2017; Mora et al., 2017; Chen et al., 2019; Manzano-Salgado et al., 2017	Liu et al., 2020	1.07986e-05	-0.000443652	0.000465249	0	0.00889738	-0.027702	0.0454967
PFHxS_prenatal_WC_girls_4_18y	Zhang, Lei, et al., 2022; Bloom et al., 2022; Hartman et al., 2017; Liu et al., 2020; Chen et al., 2019; Manzano-Salgado et al., 2017	Mora et al., 2017	5.93581e-05	-0.00185203	0.00197075	0	0.0152453	-0.0259809	0.0564716
PFHxS_prenatal_WC_girls_4_18y	Zhang, Lei, et al., 2022; Bloom et al., 2022; Hartman et al., 2017; Liu et al., 2020; Mora et al., 2017; Manzano-Salgado et al., 2017	Chen et al., 2019	-2.55671e-05	-0.000510727	0.000459593	0.00751226	0.0139148	-0.0246292	0.0524588
PFHxS_prenatal_WC_girls_4_18y	Zhang, Lei, et al., 2022; Bloom et al., 2022; Hartman et al., 2017; Liu et al., 2020; Mora et al., 2017; Chen et al., 2019	Manzano-Salgado et al., 2017	0.000290814	-0.00230386	0.00288548	0.150557	0.00146389	-0.0147313	0.0176591
PFNA_prenatal_WC_both_sexes_4_18y	Papadopoulou et al., 2021; Zhang, Lei, et al., 2022; Bloom et al., 2022; Liu et al., 2020; Mora et al., 2017; Chen et al., 2019; Manzano-Salgado et al., 2017	NONE	0.000417234	-0.000627481	0.00146195	0.136474	0.0411367	-0.00016707	0.0824405
PFNA_prenatal_WC_both_sexes_4_18y	Zhang, Lei, et al., 2022; Bloom et al., 2022; Liu et al., 2020; Mora et al., 2017; Chen et al., 2019; Manzano-Salgado et al., 2017	Papadopoulou et al., 2021	0.000404177	-0.00062592	0.00143427	0	0.0234876	-0.0122705	0.0592458
PFNA_prenatal_WC_both_sexes_4_18y	Papadopoulou et al., 2021; Bloom et al., 2022; Liu et al., 2020; Mora et al., 2017; Chen et al., 2019; Manzano-Salgado et al., 2017	Zhang, Lei, et al., 2022	0.000477949	-0.000662358	0.00161826	0.269523	0.0407063	0.00116058	0.0802521
PFNA_prenatal_WC_both_sexes_4_18y	Papadopoulou et al., 2021; Zhang, Lei, et al., 2022; Liu et al., 2020; Mora et al., 2017; Chen et al., 2019; Manzano-Salgado et al., 2017	Bloom et al., 2022	0.00040294	-0.000625789	0.00143167	0	0.0314991	-0.00785864	0.0708569
PFNA_prenatal_WC_both_sexes_4_18y	Papadopoulou et al., 2021; Zhang, Lei, et al., 2022; Bloom et al., 2022; Mora et al., 2017; Chen et al., 2019; Manzano-Salgado et al., 2017	Liu et al., 2020	0.000639598	-0.00211671	0.0033959	0.254555	0.0372297	5.57243e-05	0.0744036
PFNA_prenatal_WC_both_sexes_4_18y	Papadopoulou et al., 2021; Zhang, Lei, et al., 2022; Bloom et al., 2022; Liu et al., 2020; Chen et al., 2019; Manzano-Salgado et al., 2017	Mora et al., 2017	0.000102882	-0.000584187	0.000789951	0.0642932	0.0447128	0.000884905	0.0885406
PFNA_prenatal_WC_both_sexes_4_18y	Papadopoulou et al., 2021; Zhang, Lei, et al., 2022; Bloom et al., 2022; Liu et al., 2020; Mora et al., 2017; Manzano-Salgado et al., 2017	Chen et al., 2019	0.00130106	-0.000491942	0.00309405	0.0832827	0.042159	0.00107454	0.0832435
PFNA_prenatal_WC_both_sexes_4_18y	Papadopoulou et al., 2021; Zhang, Lei, et al., 2022; Bloom et al., 2022; Liu et al., 2020; Mora et al., 2017; Chen et al., 2019	Manzano-Salgado et al., 2017	0.000413613	-0.000627213	0.00145444	0.258124	0.0397356	0.00395139	0.0755198
PFNA_prenatal_WC_boys_4_18y	Zhang, Lei, et al., 2022; Bloom et al., 2022; Liu et al., 2020; Mora et al., 2017; Chen et al., 2019; Manzano-Salgado et al., 2017	NONE	-0.000135459	-0.000618851	0.000347933	0	0.0477026	-0.0105384	0.105944
PFNA_prenatal_WC_boys_4_18y	Bloom et al., 2022; Liu et al., 2020; Mora et al., 2017; Chen et al., 2019; Manzano-Salgado et al., 2017	Zhang, Lei, et al., 2022	-0.000133737	-0.000617238	0.000349763	0	0.0482036	-0.00641332	0.102821
PFNA_prenatal_WC_boys_4_18y	Zhang, Lei, et al., 2022; Liu et al., 2020; Mora et al., 2017; Chen et al., 2019; Manzano-Salgado et al., 2017	Bloom et al., 2022	-0.000136298	-0.000619693	0.000347096	0	0.033784	-0.0153091	0.082877
PFNA_prenatal_WC_boys_4_18y	Zhang, Lei, et al., 2022; Bloom et al., 2022; Mora et al., 2017; Chen et al., 2019; Manzano-Salgado et al., 2017	Liu et al., 2020	-0.000136586	-0.000619983	0.000346811	0	0.041423	-0.0116015	0.0944475
PFNA_prenatal_WC_boys_4_18y	Zhang, Lei, et al., 2022; Bloom et al., 2022; Liu et al., 2020; Chen et al., 2019; Manzano-Salgado et al., 2017	Mora et al., 2017	-0.000150932	-0.000639805	0.000337941	0	0.0543742	-0.00808652	0.116835
PFNA_prenatal_WC_boys_4_18y	Zhang, Lei, et al., 2022; Bloom et al., 2022; Liu et al., 2020; Mora et al., 2017; Manzano-Salgado et al., 2017	Chen et al., 2019	0.00057674	-0.00262559	0.00377907	0	0.0500648	-0.0072621	0.107392
PFNA_prenatal_WC_boys_4_18y	Zhang, Lei, et al., 2022; Bloom et al., 2022; Liu et al., 2020; Mora et al., 2017; Chen et al., 2019	Manzano-Salgado et al., 2017	-0.000136314	-0.000619708	0.00034708	0	0.0267182	-0.0131941	0.0666306
PFNA_prenatal_WC_girls_4_18y	Zhang, Lei, et al., 2022; Bloom et al., 2022; Hartman et al., 2017; Liu et al., 2020; Mora et al., 2017; Chen et al., 2019; Manzano-Salgado et al., 2017	NONE	0.00103568	-0.000210009	0.00228137	0	-0.00354094	-0.0509016	0.0438198
PFNA_prenatal_WC_girls_4_18y	Bloom et al., 2022; Hartman et al., 2017; Liu et al., 2020; Mora et al., 2017; Chen et al., 2019; Manzano-Salgado et al., 2017	Zhang, Lei, et al., 2022	0.00115829	-0.000154488	0.00247106	0	-0.00165512	-0.0508386	0.0475284
PFNA_prenatal_WC_girls_4_18y	Zhang, Lei, et al., 2022; Hartman et al., 2017; Liu et al., 2020; Mora et al., 2017; Chen et al., 2019; Manzano-Salgado et al., 2017	Bloom et al., 2022	0.00103171	-0.000214035	0.00227745	0	-0.0103831	-0.057578	0.0368118
PFNA_prenatal_WC_girls_4_18y	Zhang, Lei, et al., 2022; Bloom et al., 2022; Liu et al., 2020; Mora et al., 2017; Chen et al., 2019; Manzano-Salgado et al., 2017	Hartman et al., 2017	0.00104997	-0.000201462	0.0023014	0	-0.00170483	-0.0549071	0.0514975
PFNA_prenatal_WC_girls_4_18y	Zhang, Lei, et al., 2022; Bloom et al., 2022; Hartman et al., 2017; Mora et al., 2017; Chen et al., 2019; Manzano-Salgado et al., 2017	Liu et al., 2020	0.00103591	-0.000209792	0.00228161	0	-0.000582389	-0.040694	0.0395292
PFNA_prenatal_WC_girls_4_18y	Zhang, Lei, et al., 2022; Bloom et al., 2022; Hartman et al., 2017; Liu et al., 2020; Chen et al., 2019; Manzano-Salgado et al., 2017	Mora et al., 2017	0.000607477	-0.000943133	0.00215809	0	-0.00224805	-0.0570029	0.0525068
PFNA_prenatal_WC_girls_4_18y	Zhang, Lei, et al., 2022; Bloom et al., 2022; Hartman et al., 2017; Liu et al., 2020; Mora et al., 2017; Manzano-Salgado et al., 2017	Chen et al., 2019	0.00136483	-0.000464791	0.00319445	0	-0.00183535	-0.0530363	0.0493656
PFNA_prenatal_WC_girls_4_18y	Zhang, Lei, et al., 2022; Bloom et al., 2022; Hartman et al., 2017; Liu et al., 2020; Mora et al., 2017; Chen et al., 2019	Manzano-Salgado et al., 2017	0.00103865	-0.000207087	0.00228438	0	0.00825542	-0.0340188	0.0505297
PFDA_prenatal_WC_both_sexes_4_18y	Zhang, Lei, et al., 2022; Bloom et al., 2022; Chen et al., 2019	NONE	0.000290523	-0.000200725	0.00078177	0	0.0323838	-0.179057	0.243824
PFDA_prenatal_WC_both_sexes_4_18y	Bloom et al., 2022; Chen et al., 2019	Zhang, Lei, et al., 2022	0.000295234	-0.000196671	0.000787139	0	0.0352609	-0.193092	0.263614
PFDA_prenatal_WC_both_sexes_4_18y	Zhang, Lei, et al., 2022; Chen et al., 2019	Bloom et al., 2022	0.000290432	-0.000200816	0.00078168	0	-0.000440067	-0.00441144	0.00353131
PFDA_prenatal_WC_both_sexes_4_18y	Zhang, Lei, et al., 2022; Bloom et al., 2022	Chen et al., 2019	-0.00143472	-0.0109402	0.00807071	0	0.0396488	-0.221516	0.300814
PFDA_prenatal_WC_boys_4_18y	Zhang, Lei, et al., 2022; Bloom et al., 2022; Chen et al., 2019	NONE	-7.5684e-05	-0.000425599	0.00027423	0	0.0311935	-0.309725	0.372112
PFDA_prenatal_WC_boys_4_18y	Bloom et al., 2022; Chen et al., 2019	Zhang, Lei, et al., 2022	-7.46881e-05	-0.000424626	0.00027525	0	0.0351147	-0.333934	0.404163
PFDA_prenatal_WC_boys_4_18y	Zhang, Lei, et al., 2022; Chen et al., 2019	Bloom et al., 2022	-7.57018e-05	-0.000425616	0.000274213	0	-0.00321742	-0.0159394	0.00950451
PFDA_prenatal_WC_boys_4_18y	Zhang, Lei, et al., 2022; Bloom et al., 2022	Chen et al., 2019	-0.00742938	-0.0377703	0.0229115	0	0.0373284	-0.383446	0.458103
PFDA_prenatal_WC_girls_4_18y	Zhang, Lei, et al., 2022; Bloom et al., 2022; Chen et al., 2019	NONE	0.00098571	-0.000148061	0.00211948	0	0.0329473	-0.244123	0.310018
PFDA_prenatal_WC_girls_4_18y	Bloom et al., 2022; Chen et al., 2019	Zhang, Lei, et al., 2022	0.00103152	-0.000132289	0.00219533	0	0.0355672	-0.262903	0.334037
PFDA_prenatal_WC_girls_4_18y	Zhang, Lei, et al., 2022; Chen et al., 2019	Bloom et al., 2022	0.00098543	-0.000148343	0.0021192	0	0.000658948	-0.0015304	0.00284829
PFDA_prenatal_WC_girls_4_18y	Zhang, Lei, et al., 2022; Bloom et al., 2022	Chen et al., 2019	0.000138031	-0.0048845	0.00516056	0	0.040348	-0.302214	0.38291
PFUA_prenatal_WC_both_sexes_4_18y	Zhang, Lei, et al., 2022; Bloom et al., 2022; Chen et al., 2019	NONE	0.000489349	-0.000994597	0.00197329	0.671005	0.372889	0.0703035	0.675474
PFUA_prenatal_WC_both_sexes_4_18y	Bloom et al., 2022; Chen et al., 2019	Zhang, Lei, et al., 2022	0.296949	-0.394514	0.988412	0.827941	0.402162	-0.319408	1.12373
PFUA_prenatal_WC_both_sexes_4_18y	Zhang, Lei, et al., 2022; Chen et al., 2019	Bloom et al., 2022	0.000445689	-0.000249888	0.00114127	0	0.00169469	-0.00309055	0.00647993
PFUA_prenatal_WC_both_sexes_4_18y	Zhang, Lei, et al., 2022; Bloom et al., 2022	Chen et al., 2019	0.298224	-0.390148	0.986595	0.826411	0.460931	-0.297734	1.2196
PFUA_prenatal_WC_boys_4_18y	Zhang, Lei, et al., 2022; Bloom et al., 2022; Chen et al., 2019	NONE	0.000228518	-0.00439842	0.00485545	0.378242	0.513237	-0.113888	1.14036
PFUA_prenatal_WC_boys_4_18y	Bloom et al., 2022; Chen et al., 2019	Zhang, Lei, et al., 2022	0.299529	-0.588915	1.18797	0.607932	0.552952	-0.464927	1.57083
PFUA_prenatal_WC_boys_4_18y	Zhang, Lei, et al., 2022; Chen et al., 2019	Bloom et al., 2022	-2.43872e-05	-0.000547274	0.000498499	0	0.00630529	-0.00890395	0.0215145
PFUA_prenatal_WC_boys_4_18y	Zhang, Lei, et al., 2022; Bloom et al., 2022	Chen et al., 2019	0.304256	-0.565625	1.17414	0.595253	0.635695	-0.449994	1.72138
PFUA_prenatal_WC_girls_4_18y	Zhang, Lei, et al., 2022; Bloom et al., 2022; Chen et al., 2019	NONE	0.00149178	-0.00153697	0.00452052	0	0.280509	-0.16239	0.723408
PFUA_prenatal_WC_girls_4_18y	Bloom et al., 2022; Chen et al., 2019	Zhang, Lei, et al., 2022	0.0935915	-0.303156	0.49034	0.344254	0.301897	-0.267405	0.871198
PFUA_prenatal_WC_girls_4_18y	Zhang, Lei, et al., 2022; Chen et al., 2019	Bloom et al., 2022	0.00135166	-0.000196667	0.00289999	0	0.00171817	-0.00105644	0.00449278
PFUA_prenatal_WC_girls_4_18y	Zhang, Lei, et al., 2022; Bloom et al., 2022	Chen et al., 2019	0.0937782	-0.301058	0.488614	0.34168	0.34667	-0.287037	0.980376
PFOA_children_BMI_both_sexes_4_18y	Canova et al., 2021; Scinicariello et al., 2020; Sevelsted et al., 2022; Liu et al., 2020; Timmermann et al., 2014; Karlsen et al., 2017; Schillemans et al., 2023; Vrijheid et al., 2020	NONE	-0.0525446	-0.103911	-0.00117847	0.843286	-0.0445109	-0.0603902	-0.0286317
PFOA_children_BMI_both_sexes_4_18y	Scinicariello et al., 2020; Sevelsted et al., 2022; Liu et al., 2020; Timmermann et al., 2014; Karlsen et al., 2017; Schillemans et al., 2023; Vrijheid et al., 2020	Canova et al., 2021	-0.0642357	-0.123323	-0.00514792	0.856593	-0.097189	-0.16118	-0.033198
PFOA_children_BMI_both_sexes_4_18y	Canova et al., 2021; Sevelsted et al., 2022; Liu et al., 2020; Timmermann et al., 2014; Karlsen et al., 2017; Schillemans et al., 2023; Vrijheid et al., 2020	Scinicariello et al., 2020	-0.0510242	-0.107654	0.00560583	0.861199	-0.0654364	-0.0957745	-0.0350984
PFOA_children_BMI_both_sexes_4_18y	Canova et al., 2021; Scinicariello et al., 2020; Liu et al., 2020; Timmermann et al., 2014; Karlsen et al., 2017; Schillemans et al., 2023; Vrijheid et al., 2020	Sevelsted et al., 2022	-0.0629275	-0.120388	-0.00546697	0.865433	-0.0735327	-0.105686	-0.041379
PFOA_children_BMI_both_sexes_4_18y	Canova et al., 2021; Scinicariello et al., 2020; Sevelsted et al., 2022; Timmermann et al., 2014; Karlsen et al., 2017; Schillemans et al., 2023; Vrijheid et al., 2020	Liu et al., 2020	-0.0491379	-0.100429	0.00215295	0.85972	-0.0536728	-0.074601	-0.0327447
PFOA_children_BMI_both_sexes_4_18y	Canova et al., 2021; Scinicariello et al., 2020; Sevelsted et al., 2022; Liu et al., 2020; Karlsen et al., 2017; Schillemans et al., 2023; Vrijheid et al., 2020	Timmermann et al., 2014	-0.0643393	-0.12329	-0.00538903	0.854881	-0.0724722	-0.133073	-0.011871
PFOA_children_BMI_both_sexes_4_18y	Canova et al., 2021; Scinicariello et al., 2020; Sevelsted et al., 2022; Liu et al., 2020; Timmermann et al., 2014; Schillemans et al., 2023; Vrijheid et al., 2020	Karlsen et al., 2017	-0.0564027	-0.118759	0.00595368	0.850762	-0.0685516	-0.10082	-0.0362836
PFOA_children_BMI_both_sexes_4_18y	Canova et al., 2021; Scinicariello et al., 2020; Sevelsted et al., 2022; Liu et al., 2020; Timmermann et al., 2014; Karlsen et al., 2017; Vrijheid et al., 2020	Schillemans et al., 2023	-0.0488638	-0.1084	0.0106727	0.835871	-0.0634173	-0.097679	-0.0291555
PFOA_children_BMI_both_sexes_4_18y	Canova et al., 2021; Scinicariello et al., 2020; Sevelsted et al., 2022; Liu et al., 2020; Timmermann et al., 2014; Karlsen et al., 2017; Schillemans et al., 2023	Vrijheid et al., 2020	-0.0222168	-0.0507877	0.00635407	0.683483	-0.0464528	-0.0792417	-0.0136638
PFOA_children_BMI_boys_4_18y	Canova et al., 2021; Liu et al., 2020; Schillemans et al., 2023	NONE	-0.0909881	-0.248773	0.0667965	0.887976	-0.0410289	-0.228456	0.146398
PFOA_children_BMI_boys_4_18y	Liu et al., 2020; Schillemans et al., 2023	Canova et al., 2021	-0.177974	-0.260574	-0.0953743	0	-0.187668	-0.344037	-0.0312999
PFOA_children_BMI_boys_4_18y	Canova et al., 2021; Schillemans et al., 2023	Liu et al., 2020	-0.0834698	-0.256786	0.0898467	0.942348	-0.0604454	-0.239544	0.118653
PFOA_children_BMI_boys_4_18y	Canova et al., 2021; Liu et al., 2020	Schillemans et al., 2023	-2.62778e-07	-0.000664729	0.000664204	0	-0.0302904	-0.113591	0.0530102
PFOA_children_BMI_girls_4_18y	Canova et al., 2021; Liu et al., 2020; Schillemans et al., 2023; Pinney et al., 2019	NONE	-0.0150047	-0.0400518	0.0100424	0.738655	-0.0134299	-0.045556	0.0186962
PFOA_children_BMI_girls_4_18y	Liu et al., 2020; Schillemans et al., 2023; Pinney et al., 2019	Canova et al., 2021	-0.0309027	-0.0487051	-0.0131002	0	-0.0633025	-0.1602	0.0335953
PFOA_children_BMI_girls_4_18y	Canova et al., 2021; Schillemans et al., 2023; Pinney et al., 2019	Liu et al., 2020	-0.0144916	-0.0394896	0.0105063	0.808866	-0.0108398	-0.0422679	0.0205882
PFOA_children_BMI_girls_4_18y	Canova et al., 2021; Liu et al., 2020; Pinney et al., 2019	Schillemans et al., 2023	-0.0159574	-0.0454755	0.0135607	0.825041	-0.0433353	-0.113816	0.0271457
PFOA_children_BMI_girls_4_18y	Canova et al., 2021; Liu et al., 2020; Schillemans et al., 2023	Pinney et al., 2019	-0.00160432	-0.00263403	-0.000574622	0	-0.035817	-0.1018	0.0301662
PFOS_children_BMI_both_sexes_4_18y	Canova et al., 2021; Scinicariello et al., 2020; Sevelsted et al., 2022; Liu et al., 2020; Timmermann et al., 2014; Karlsen et al., 2017; Schillemans et al., 2023; Vrijheid et al., 2020	NONE	-0.0165864	-0.0282618	-0.00491106	0.816825	-0.0225771	-0.0412314	-0.00392279
PFOS_children_BMI_both_sexes_4_18y	Scinicariello et al., 2020; Sevelsted et al., 2022; Liu et al., 2020; Timmermann et al., 2014; Karlsen et al., 2017; Schillemans et al., 2023; Vrijheid et al., 2020	Canova et al., 2021	-0.0150643	-0.0286329	-0.00149563	0.694077	-0.0220301	-0.0392193	-0.004841
PFOS_children_BMI_both_sexes_4_18y	Canova et al., 2021; Sevelsted et al., 2022; Liu et al., 2020; Timmermann et al., 2014; Karlsen et al., 2017; Schillemans et al., 2023; Vrijheid et al., 2020	Scinicariello et al., 2020	-0.0165125	-0.0287223	-0.00430267	0.840176	-0.0228726	-0.039243	-0.00650212
PFOS_children_BMI_both_sexes_4_18y	Canova et al., 2021; Scinicariello et al., 2020; Liu et al., 2020; Timmermann et al., 2014; Karlsen et al., 2017; Schillemans et al., 2023; Vrijheid et al., 2020	Sevelsted et al., 2022	-0.0165385	-0.0288482	-0.00422888	0.83981	-0.022886	-0.0393913	-0.00638062
PFOS_children_BMI_both_sexes_4_18y	Canova et al., 2021; Scinicariello et al., 2020; Sevelsted et al., 2022; Timmermann et al., 2014; Karlsen et al., 2017; Schillemans et al., 2023; Vrijheid et al., 2020	Liu et al., 2020	-0.016178	-0.0278744	-0.00448172	0.838945	-0.0205483	-0.0355504	-0.0055463
PFOS_children_BMI_both_sexes_4_18y	Canova et al., 2021; Scinicariello et al., 2020; Sevelsted et al., 2022; Liu et al., 2020; Karlsen et al., 2017; Schillemans et al., 2023; Vrijheid et al., 2020	Timmermann et al., 2014	-0.0210496	-0.0308985	-0.0112006	0.105157	-0.0245809	-0.0360776	-0.0130841
PFOS_children_BMI_both_sexes_4_18y	Canova et al., 2021; Scinicariello et al., 2020; Sevelsted et al., 2022; Liu et al., 2020; Timmermann et al., 2014; Schillemans et al., 2023; Vrijheid et al., 2020	Karlsen et al., 2017	-0.0168977	-0.0305464	-0.0032491	0.828622	-0.0230452	-0.0400337	-0.00605669
PFOS_children_BMI_both_sexes_4_18y	Canova et al., 2021; Scinicariello et al., 2020; Sevelsted et al., 2022; Liu et al., 2020; Timmermann et al., 2014; Karlsen et al., 2017; Vrijheid et al., 2020	Schillemans et al., 2023	-0.018809	-0.0328114	-0.00480665	0.83564	-0.0254295	-0.044787	-0.00607193
PFOS_children_BMI_both_sexes_4_18y	Canova et al., 2021; Scinicariello et al., 2020; Sevelsted et al., 2022; Liu et al., 2020; Timmermann et al., 2014; Karlsen et al., 2017; Schillemans et al., 2023	Vrijheid et al., 2020	-0.0125116	-0.0233841	-0.00163907	0.768429	-0.019816	-0.0355086	-0.0041234
PFOS_children_BMI_boys_4_18y	Canova et al., 2021; Liu et al., 2020; Schillemans et al., 2023	NONE	-0.0228888	-0.0338269	-0.0119508	0	-0.0235025	-0.0354109	-0.0115941
PFOS_children_BMI_boys_4_18y	Liu et al., 2020; Schillemans et al., 2023	Canova et al., 2021	-0.0295748	-0.0496528	-0.0094969	0	-0.0459242	-0.105597	0.0137486
PFOS_children_BMI_boys_4_18y	Canova et al., 2021; Schillemans et al., 2023	Liu et al., 2020	-0.0227348	-0.0336836	-0.011786	0	-0.0231485	-0.0341524	-0.0121446
PFOS_children_BMI_boys_4_18y	Canova et al., 2021; Liu et al., 2020	Schillemans et al., 2023	-0.0202929	-0.0333184	-0.00726753	0	-0.031119	-0.0665973	0.00435928
PFOS_children_BMI_girls_4_18y	Canova et al., 2021; Liu et al., 2020; Schillemans et al., 2023	NONE	-0.0162141	-0.0530834	0.0206551	0.840141	-0.027784	-0.0719359	0.0163678
PFOS_children_BMI_girls_4_18y	Liu et al., 2020; Schillemans et al., 2023	Canova et al., 2021	0.00428987	-0.0123596	0.0209393	0	0.00176118	-0.0317369	0.0352593
PFOS_children_BMI_girls_4_18y	Canova et al., 2021; Schillemans et al., 2023	Liu et al., 2020	-0.0169043	-0.0588018	0.0249932	0.919927	-0.0230496	-0.0666448	0.0205456
PFOS_children_BMI_girls_4_18y	Canova et al., 2021; Liu et al., 2020	Schillemans et al., 2023	-0.0377669	-0.0543762	-0.0211577	0	-0.033666	-0.0575639	-0.00976804
PFHxS_children_BMI_both_sexes_4_18y	Canova et al., 2021; Scinicariello et al., 2020; Liu et al., 2020; Karlsen et al., 2017; Schillemans et al., 2023; Vrijheid et al., 2020	NONE	-0.024711	-0.0813858	0.0319639	0.34665	-0.0334143	-0.115692	0.0488632
PFHxS_children_BMI_both_sexes_4_18y	Scinicariello et al., 2020; Liu et al., 2020; Karlsen et al., 2017; Schillemans et al., 2023; Vrijheid et al., 2020	Canova et al., 2021	-0.0644312	-0.134328	0.00546611	0	-0.0814553	-0.229365	0.0664544
PFHxS_children_BMI_both_sexes_4_18y	Canova et al., 2021; Liu et al., 2020; Karlsen et al., 2017; Schillemans et al., 2023; Vrijheid et al., 2020	Scinicariello et al., 2020	-0.0172371	-0.0849474	0.0504732	0.320808	-0.0458076	-0.160027	0.0684118
PFHxS_children_BMI_both_sexes_4_18y	Canova et al., 2021; Scinicariello et al., 2020; Karlsen et al., 2017; Schillemans et al., 2023; Vrijheid et al., 2020	Liu et al., 2020	-0.0285201	-0.0875165	0.0304764	0.434189	-0.0663233	-0.166812	0.0341654
PFHxS_children_BMI_both_sexes_4_18y	Canova et al., 2021; Scinicariello et al., 2020; Liu et al., 2020; Schillemans et al., 2023; Vrijheid et al., 2020	Karlsen et al., 2017	-0.00454972	-0.0491752	0.0400757	0.185997	-0.0435703	-0.148167	0.0610268
PFHxS_children_BMI_both_sexes_4_18y	Canova et al., 2021; Scinicariello et al., 2020; Liu et al., 2020; Karlsen et al., 2017; Vrijheid et al., 2020	Schillemans et al., 2023	-0.0337566	-0.0995427	0.0320294	0.471072	-0.067481	-0.18322	0.0482581
PFHxS_children_BMI_both_sexes_4_18y	Canova et al., 2021; Scinicariello et al., 2020; Liu et al., 2020; Karlsen et al., 2017; Schillemans et al., 2023	Vrijheid et al., 2020	-0.0175312	-0.0705674	0.035505	0.233051	0.0113043	-0.0620596	0.0846681
PFHxS_children_BMI_boys_4_18y	Canova et al., 2021; Liu et al., 2020; Schillemans et al., 2023	NONE	-0.054713	-0.25579	0.146364	0.177921	-0.0331445	-0.161968	0.0956791
PFHxS_children_BMI_boys_4_18y	Liu et al., 2020; Schillemans et al., 2023	Canova et al., 2021	-0.221375	-0.517607	0.0748577	0	-0.195041	-0.59951	0.209428
PFHxS_children_BMI_boys_4_18y	Canova et al., 2021; Schillemans et al., 2023	Liu et al., 2020	-0.0576436	-0.272232	0.156945	0.584686	-0.0649487	-0.280019	0.150122
PFHxS_children_BMI_boys_4_18y	Canova et al., 2021; Liu et al., 2020	Schillemans et al., 2023	0.0128076	0.00212921	0.0234859	0	-0.00202207	-0.185506	0.181462
PFHxS_children_BMI_girls_4_18y	Canova et al., 2021; Liu et al., 2020; Schillemans et al., 2023	NONE	0.0666572	-0.113577	0.246892	0.348101	0.0398788	-0.124895	0.204652
PFHxS_children_BMI_girls_4_18y	Liu et al., 2020; Schillemans et al., 2023	Canova et al., 2021	0.216758	-0.044222	0.477738	0	0.232428	-0.0368148	0.501671
PFHxS_children_BMI_girls_4_18y	Canova et al., 2021; Schillemans et al., 2023	Liu et al., 2020	0.037616	-0.126817	0.202049	0.462154	0.0584089	-0.111004	0.227822
PFHxS_children_BMI_girls_4_18y	Canova et al., 2021; Liu et al., 2020	Schillemans et al., 2023	0.023869	-0.180504	0.228242	0.175928	0.0453849	-0.163311	0.254081
PFNA_children_BMI_both_sexes_4_18y	Scinicariello et al., 2020; Liu et al., 2020; Karlsen et al., 2017; Schillemans et al., 2023; Vrijheid et al., 2020	NONE	-0.216236	-0.488311	0.0558396	0.805426	-0.327923	-0.612061	-0.0437845
PFNA_children_BMI_both_sexes_4_18y	Liu et al., 2020; Karlsen et al., 2017; Schillemans et al., 2023; Vrijheid et al., 2020	Scinicariello et al., 2020	-0.302007	-0.621074	0.0170602	0.845756	-0.305697	-0.758938	0.147545
PFNA_children_BMI_both_sexes_4_18y	Scinicariello et al., 2020; Karlsen et al., 2017; Schillemans et al., 2023; Vrijheid et al., 2020	Liu et al., 2020	-0.224198	-0.501553	0.0531564	0.853297	-0.308386	-0.560695	-0.0560763
PFNA_children_BMI_both_sexes_4_18y	Scinicariello et al., 2020; Liu et al., 2020; Schillemans et al., 2023; Vrijheid et al., 2020	Karlsen et al., 2017	-0.285316	-0.641171	0.0705387	0.816358	-0.276812	-0.732415	0.178791
PFNA_children_BMI_both_sexes_4_18y	Scinicariello et al., 2020; Liu et al., 2020; Karlsen et al., 2017; Vrijheid et al., 2020	Schillemans et al., 2023	-0.172443	-0.509935	0.16505	0.82176	-0.179093	-0.582929	0.224743
PFNA_children_BMI_both_sexes_4_18y	Scinicariello et al., 2020; Liu et al., 2020; Karlsen et al., 2017; Schillemans et al., 2023	Vrijheid et al., 2020	-0.0502405	-0.0925465	-0.00793439	0.378393	-0.123733	-0.482666	0.235199
PFOA_children_risk_both_sexes_4_18y	Karlsen et al., 2017; Geiger et al., 2021; Domazet et al., 2016; Vrijheid et al., 2020	NONE	-0.0100997	-0.049653	0.0294535	0.836445	-0.0073501	-0.0553715	0.0406713
PFOA_children_risk_both_sexes_4_18y	Geiger et al., 2021; Domazet et al., 2016; Vrijheid et al., 2020	Karlsen et al., 2017	-0.00805758	-0.0649724	0.0488572	0.877411	-0.0101265	-0.0664736	0.0462206
PFOA_children_risk_both_sexes_4_18y	Karlsen et al., 2017; Domazet et al., 2016; Vrijheid et al., 2020	Geiger et al., 2021	-0.0209526	-0.0685668	0.0266616	0.875924	-0.0365369	-0.0858913	0.0128174
PFOA_children_risk_both_sexes_4_18y	Karlsen et al., 2017; Geiger et al., 2021; Vrijheid et al., 2020	Domazet et al., 2016	-0.0203534	-0.0714487	0.0307418	0.830404	-0.0154484	-0.0661842	0.0352873
PFOA_children_risk_both_sexes_4_18y	Karlsen et al., 2017; Geiger et al., 2021; Domazet et al., 2016	Vrijheid et al., 2020	0.00694998	-0.0178522	0.0317521	0.618025	0.01345	-0.0181404	0.0450403
PFOS_children_risk_both_sexes_4_18y	Karlsen et al., 2017; Geiger et al., 2021; Domazet et al., 2016	NONE	0.00160161	-0.0081404	0.0113436	0.778853	-0.000710517	-0.0137473	0.0123262
PFOS_children_risk_both_sexes_4_18y	Geiger et al., 2021; Domazet et al., 2016	Karlsen et al., 2017	0.00476341	-0.00456952	0.0140963	0.801348	0.0018055	-0.00918165	0.0127927
PFOS_children_risk_both_sexes_4_18y	Karlsen et al., 2017; Domazet et al., 2016	Geiger et al., 2021	0.00140805	-0.0162997	0.0191158	0.81243	-0.000930383	-0.019222	0.0173612
PFOS_children_risk_both_sexes_4_18y	Karlsen et al., 2017; Geiger et al., 2021	Domazet et al., 2016	-0.00226467	-0.00920904	0.0046797	0.0684819	-0.00283723	-0.00987192	0.00419746
